# Supplementary material for: Secretory pathway Ca-ATPase 2 (SPCA2) gene knockout results in mouse mammary gland changes and a secretory defect
Source: Research Square preprint supplement (doi:10.21203/rs.3.rs-830264/v1), 2021-08-26
Supplement: Supplementary file 1 [file 3380caabc288bb711a059a47.xlsx]

## Sheet: Tab 1 Data
Accession	ID	Gene Name	Description	Significant	.=-LOG(P-value)	Difference	Peptides	Razor + unique peptides	Unique peptides	Sequence coverage [%]	Unique + razor sequence coverage [%]	Unique sequence coverage [%]	Mol. weight [kDa]	Q-value	Score	Intensity	MS/MS count	22-KO	24-KO	36-WT	38-KO	57-KO	59-WT	63-WT	65-WT
Q8K273	MMGT1_MOUSE	Mmgt1	Membrane magnesium transporter 1	+	3.54659	-0.785335	4	4	4	35.1	35.1	35.1	14.677	0	18.655	108620000	53	23.4746	23.3676	23.9145	23.1558	23.2046	24.1895	24.2275	24.0124
Q99L88	SNTB1_MOUSE	Sntb1	Beta-1-syntrophin	+	2.86405	-1.56932	18	18	17	49	49	47.7	58.081	0	78.674	137330000	79	21.4363	20.9545	22.135	20.4483	20.5028	22.2457	22.857	22.3815
A2A5R2	BIG2_MOUSE	Arfgef2	Brefeldin A-inhibited guanine nucleotide-exchange protein 2		0	NaN	2	2	2	1.5	1.5	1.5	202.24	0	5.5608	1976300	4	NaN	NaN	NaN	NaN	NaN	NaN	NaN	NaN
A2A863	ITB4_MOUSE	Itgb4	Integrin beta-4		0.0778522	0.0358214	27	27	27	16.8	16.8	16.8	201.65	0	57.118	45658000	78	20.0007	20.424	20.4321	20.4414	20.6336	20.3942	20.4802	20.0499
F6Y3V0	F6Y3V0_MOUSE	Ptprf	Protein-tyrosine-phosphatase (Fragment)		0	NaN	2	2	2	2	2	2	145.38	0.0011429	2.2934	1255100	3	NaN	NaN	NaN	NaN	NaN	NaN	NaN	NaN
A2ADY9	DDI2_MOUSE	Ddi2	Protein DDI1 homolog 2		0	NaN	1	1	1	4.8	4.8	4.8	44.59	0	4.1326	735020	2	NaN	NaN	NaN	NaN	NaN	NaN	NaN	NaN
A2AI08	TPRN_MOUSE	Tprn	Taperin		0	NaN	2	2	2	3.9	3.9	3.9	80.088	0.0096705	1.58	3120800	7	NaN	NaN	NaN	NaN	NaN	NaN	NaN	NaN
A2AJ88	PLPL7_MOUSE	Pnpla7	Patatin-like phospholipase domain-containing protein 7		0	0.230883	5	5	4	5	5	4.4	150.49	0	10.972	7007000	16	NaN	20.5437	NaN	NaN	NaN	20.4483	20.4301	20.06
A2ALW5	DJC25_MOUSE	Dnajc25	DnaJ homolog subfamily C member 25		0.355757	0.192672	6	6	6	15.1	15.1	15.1	41.937	0	14.762	14785000	21	20.3398	20.1848	19.7603	NaN	19.6429	20.0174	19.8119	NaN
A2AN08	UBR4_MOUSE	Ubr4	E3 ubiquitin-protein ligase UBR4		0	NaN	4	4	4	0.8	0.8	0.8	572.28	0	4.6792	3110500	4	NaN	NaN	NaN	NaN	NaN	NaN	NaN	NaN
A2AQ25	SKT_MOUSE	Skt	Sickle tail protein		0	NaN	4	4	4	3.5	3.5	3.5	213.03	0.0003882	2.5432	4381100	5	NaN	NaN	NaN	NaN	NaN	NaN	NaN	NaN
A2ARA8	ITA8_MOUSE	Itga8	Integrin alpha-8		0	NaN	1	1	1	1	1	1	117.55	0.0047847	1.8651	199060	1	NaN	NaN	NaN	NaN	NaN	NaN	NaN	NaN
A2ARI4	LGR4_MOUSE	Lgr4	Leucine-rich repeat-containing G-protein coupled receptor 4		0	NaN	1	1	1	1.1	1.1	1.1	104.15	0	3.6193	1394000	3	NaN	NaN	NaN	NaN	NaN	NaN	NaN	NaN
E9Q8N1	E9Q8N1_MOUSE	Ttn	Titin		0	NaN	3	3	3	0.1	0.1	0.1	3716	0.0040831	1.9385	15781000	4	NaN	NaN	NaN	NaN	NaN	NaN	NaN	NaN
A2AVQ5	LEXM_MOUSE	Lexm	Lymphocyte expansion molecule		0	NaN	2	2	2	6.3	6.3	6.3	47.584	0.0075949	1.687	5157700	3	NaN	NaN	NaN	NaN	NaN	NaN	NaN	NaN
A3KMP2	TTC38_MOUSE	Ttc38	Tetratricopeptide repeat protein 38		0	NaN	2	2	2	4.9	4.9	4.9	52.223	0.0076032	1.6905	780940	5	NaN	NaN	NaN	NaN	NaN	NaN	NaN	NaN
E9Q5L2	E9Q5L2_MOUSE	Itih4	Inter alpha-trypsin inhibitor, heavy chain 4		0.50141	0.404047	6	6	6	8	8	8	102.82	0	41.769	15269000	19	19.159	20.1477	18.7555	19.434	20.0502	NaN	19.525	19.6006
A7L9Z8	AT2C2_MOUSE	Atp2c2	Calcium-transporting ATPase type 2C member 2		0	NaN	25	25	24	31.5	31.5	29.6	102.53	0	290.97	177270000	129	NaN	NaN	22.5238	NaN	NaN	22.407	22.4784	22.4541
A9JSM3	TM238_MOUSE	Tmem238	Transmembrane protein 238		0	0.365061	5	5	5	20.5	20.5	20.5	18.226	0	6.3977	26462000	19	NaN	21.2667	20.912	NaN	NaN	22.0589	20.1655	20.47
Z4YKM2	Z4YKM2_MOUSE	Cisd3	CDGSH iron-sulfur domain-containing protein 3, mitochondrial		0	NaN	1	1	1	11.3	11.3	11.3	13.155	0.0093492	1.6197	2427500	11	NaN	NaN	NaN	NaN	NaN	NaN	NaN	NaN
B1AUE5	PEX10_MOUSE	Pex10	Peroxisome biogenesis factor 10		0	NaN	1	1	1	5.2	5.2	5.2	37.157	0	2.835	506690	2	NaN	NaN	NaN	NaN	NaN	NaN	NaN	NaN
B1AZA5	TM245_MOUSE	Tmem245	Transmembrane protein 245		0	NaN	2	2	2	2.9	2.9	2.9	97.356	0	2.6096	2290200	8	NaN	NaN	NaN	NaN	NaN	NaN	NaN	NaN
E9QAI5	E9QAI5_MOUSE	Cad	Aspartate carbamoyltransferase		0	NaN	2	2	2	1	1	1	236.25	0	6.2669	2346000	7	NaN	NaN	NaN	NaN	NaN	17.7911	17.9489	NaN
B2RSH2	GNAI1_MOUSE	Gnai1	Guanine nucleotide-binding protein G(i) subunit alpha-1		0	-0.636183	15	3	3	38.4	10.7	10.7	40.361	0	6.4593	5240400	7	20.0115	NaN	20.6477	NaN	NaN	NaN	NaN	NaN
B2RXS4	PLXB2_MOUSE	Plxnb2	Plexin-B2		0.327833	-0.23188	29	29	29	21.8	21.8	21.8	206.23	0	83.147	185620000	93	23.6416	23.25	23.331	22.3068	23.4912	23.4335	23.455	23.3975
B9EJ80	PDZD8_MOUSE	Pdzd8	PDZ domain-containing protein 8		0	NaN	2	2	2	2.7	2.7	2.7	127.74	0	6.8531	1400800	7	NaN	NaN	NaN	NaN	NaN	NaN	NaN	NaN
A0A5F8MPC5	A0A5F8MPC5_MOUSE	Osbpl8	Oxysterol-binding protein (Fragment)		0	-0.0876226	5	5	5	8.5	8.5	8.5	79.231	0	14.925	12613000	15	NaN	NaN	20.5489	NaN	20.4357	20.5314	20.4367	20.5764
C0HKE5	H2A1G_MOUSE	H2ac11	Histone H2A type 1-G		0	NaN	5	1	1	35.4	8.5	8.5	14.135	0.0011407	2.2549	4371000	6	NaN	NaN	NaN	NaN	NaN	NaN	NaN	NaN
E9PU92	E9PU92_MOUSE	Slc18b1	MFS-type transporter SLC18B1		0	NaN	1	1	1	2.4	2.4	2.4	48.809	0	3.8548	376890	2	NaN	NaN	NaN	NaN	NaN	NaN	NaN	NaN
D3Z7P3	GLSK_MOUSE	Gls	Glutaminase kidney isoform, mitochondrial		0	NaN	1	1	1	2.2	2.2	2.2	73.963	0	3.6047	1360500	6	NaN	NaN	NaN	NaN	NaN	NaN	NaN	NaN
F7AC58	F7AC58_MOUSE	Piezo1	Piezo-type mechanosensitive ion channel component		1.10153	-1.1274	13	13	13	6.9	6.9	6.9	292.12	0	49.88	20374000	50	19.2523	18.6862	19.4988	NaN	NaN	20.1327	20.906	19.849
E9PV24	FIBA_MOUSE	Fga	Fibrinogen alpha chain		0.138572	-0.109343	21	21	21	25.2	25.2	25.2	87.428	0	176.75	465130000	294	22.5994	23.2112	22.8482	23.5699	22.7225	23.6438	23.248	22.8003
E9PVA8	GCN1_MOUSE	Gcn1	eIF-2-alpha kinase activator GCN1		0	NaN	8	8	8	3.2	3.2	3.2	293.02	0	14.797	23948000	17	NaN	NaN	NaN	NaN	NaN	18.0242	NaN	18.4261
E9PYK3	PARP4_MOUSE	Parp4	Protein mono-ADP-ribosyltransferase PARP4		0	-0.0508029	3	3	3	1.7	1.7	1.7	216.13	0	17.09	4519000	14	19.3453	19.3584	19.4966	19.6335	NaN	NaN	NaN	NaN
K3W4M2	K3W4M2_MOUSE	Ryr1	Ryanodine receptor 1		0	NaN	1	1	1	0.2	0.2	0.2	564.89	0	5.0774	232750	1	NaN	NaN	NaN	NaN	NaN	NaN	NaN	NaN
E9Q137	TX264_MOUSE	Tex264	Testis-expressed protein 264 homolog		2.0113	0.646005	7	7	7	30.4	30.4	30.4	33.589	0	39.209	19832000	49	20.3916	NaN	19.747	20.2652	20.0354	19.7669	19.2839	19.5412
E9Q3C1	C2CD2_MOUSE	C2cd2	C2 domain-containing protein 2		0	NaN	2	2	2	4.5	4.5	4.5	76.535	0	20.617	3465000	9	NaN	NaN	NaN	NaN	NaN	19.9594	NaN	19.5286
A0A140T8I9	A0A140T8I9_MOUSE	Pi4ka	Phosphatidylinositol 4-kinase alpha		0	NaN	8	8	8	4.6	4.6	4.6	231.35	0	31.737	6087800	19	NaN	NaN	NaN	NaN	NaN	19.0791	19.0228	19.0856
D3YWG9	D3YWG9_MOUSE	Wdfy1	WD repeat and FYVE domain-containing protein 1 (Fragment)		0	NaN	2	2	2	38.7	38.7	38.7	8.2774	0	2.7202	3834800	4	NaN	NaN	NaN	NaN	NaN	20.811	NaN	19.0123
E9Q4Z2	ACACB_MOUSE	Acacb	Acetyl-CoA carboxylase 2		1.96795	-0.34611	72	61	61	35.9	31.4	31.4	275.75	0	235.52	420730000	282	22.5586	22.6213	22.6674	22.4293	22.319	22.8945	22.7782	22.9724
E9Q555	RN213_MOUSE	Rnf213	E3 ubiquitin-protein ligase RNF213		0	NaN	3	3	3	0.6	0.6	0.6	584.78	0	6.7073	12027000	6	NaN	NaN	NaN	NaN	NaN	NaN	NaN	NaN
E9PZW0	E9PZW0_MOUSE	Dsp	Desmoplakin		0	NaN	2	2	2	0.8	0.8	0.8	261.42	0.003723	1.9518	12333000	12	NaN	NaN	NaN	NaN	NaN	NaN	NaN	NaN
E9Q735	UBE4A_MOUSE	Ube4a	Ubiquitin conjugation factor E4 A		0	NaN	2	2	2	2.9	2.9	2.9	118.2	0	7.0486	3489100	6	NaN	NaN	NaN	NaN	NaN	NaN	NaN	NaN
E9Q7D5	ARHG5_MOUSE	Arhgef5	Rho guanine nucleotide exchange factor 5		0	NaN	2	2	2	2	2	2	176.66	0.00038506	2.4257	554770	2	NaN	NaN	NaN	NaN	NaN	NaN	NaN	NaN
F7BPW6	F7BPW6_MOUSE	Sec16a	Protein transport protein sec16 (Fragment)		0	NaN	3	3	3	4	4	4	98.346	0.0055086	1.8276	38754000	5	NaN	NaN	NaN	NaN	NaN	23.1704	NaN	22.1092
E9Q805	E9Q805_MOUSE	Farp1	FERM, ARHGEF and pleckstrin domain-containing protein 1 (Fragment)		0	NaN	2	2	2	12.3	12.3	12.3	23.863	0	5.1262	1227400	3	NaN	NaN	NaN	NaN	NaN	NaN	NaN	NaN
G3UW57	G3UW57_MOUSE	Rab11fip2	Rab11 family-interacting protein 2		0	NaN	1	1	1	3.2	3.2	3.2	41.768	0	4.706	305860	1	NaN	NaN	NaN	NaN	NaN	NaN	NaN	NaN
G5E829	AT2B1_MOUSE	Atp2b1	Plasma membrane calcium-transporting ATPase 1		0.0498703	0.0247178	19	10	8	17.9	10.2	7.7	134.75	0	41.409	31373000	39	20.4344	20.2421	20.1695	19.8085	20.3188	20.4029	20.2431	19.8895
E9Q5B5	E9Q5B5_MOUSE	Hk2	Hexokinase		0	-0.355579	11	9	9	13.9	11.4	11.4	99.213	0	15.645	14004000	25	19.7145	NaN	NaN	NaN	NaN	NaN	20.0832	20.0571
O08529	CAN2_MOUSE	Capn2	Calpain-2 catalytic subunit		0	NaN	2	2	2	4.3	4.3	4.3	79.871	0.009674	1.5842	592130	2	NaN	NaN	NaN	NaN	NaN	NaN	NaN	NaN
O08547	SC22B_MOUSE	Sec22b	Vesicle-trafficking protein SEC22b		1.29293	0.216674	17	17	17	64.7	64.7	64.7	24.74	0	188.86	859250000	395	24.3456	24.3558	24.4077	24.35	24.4887	24.0361	24.103	24.1267
O08553	DPYL2_MOUSE	Dpysl2	Dihydropyrimidinase-related protein 2		0	-0.281893	5	5	5	13.3	13.3	13.3	62.277	0	8.984	9341200	13	NaN	NaN	NaN	NaN	20.0534	NaN	20.3353	NaN
I7HJS1	I7HJS1_MOUSE	Emd	Emerin		0.663779	-0.21029	6	6	6	33.2	33.2	33.2	25.134	0	77.497	21985000	40	20.4465	20.5889	20.9216	20.8545	20.5126	20.5726	21.1044	20.6451
O08581	KCNK1_MOUSE	Kcnk1	Potassium channel subfamily K member 1		0	NaN	2	2	2	11.6	11.6	11.6	38.201	0	49.091	11909000	12	NaN	NaN	20.7784	NaN	NaN	NaN	NaN	20.309
O08600	NUCG_MOUSE	Endog	Endonuclease G, mitochondrial		0	NaN	1	1	1	3.4	3.4	3.4	32.19	0.0065693	1.7729	909390	1	NaN	NaN	NaN	NaN	NaN	NaN	NaN	NaN
O08601	MTP_MOUSE	Mttp	Microsomal triglyceride transfer protein large subunit		0	NaN	1	1	1	1.7	1.7	1.7	99.098	0	3.4925	470330	2	NaN	NaN	NaN	NaN	NaN	NaN	NaN	NaN
M0QWM9	M0QWM9_MOUSE	Metap2	Methionine aminopeptidase 2 (Fragment)		0	NaN	3	3	3	16.9	16.9	16.9	26.591	0	7.7475	2985300	3	NaN	NaN	NaN	NaN	NaN	NaN	NaN	NaN
D3YTY9	D3YTY9_MOUSE	Kng1	Kininogen-1		0.166735	-0.0869541	9	9	9	22.1	22.1	22.1	53.204	0	60.357	46918000	46	21.1994	21.1571	20.9355	21.2433	20.8878	20.9509	21.2215	21.7276
O08688	CAN5_MOUSE	Capn5	Calpain-5		0.210165	0.0892797	7	7	7	14.1	14.1	14.1	72.954	0	19.737	16595000	21	20.2526	20.3167	20.1129	NaN	NaN	19.9352	20.4346	20.2988
O08691	ARGI2_MOUSE	Arg2	Arginase-2, mitochondrial		0.0892356	-0.0736265	10	10	10	41	41	41	38.878	0	66.603	114910000	62	23.0225	21.8981	22.1714	22.227	22.5959	22.7045	22.2537	22.9084
O08692	NGP_MOUSE	Ngp	Neutrophilic granule protein		0	1.20345	5	5	5	37.1	37.1	37.1	19.331	0	14.907	8535400	31	NaN	20.9953	NaN	NaN	NaN	19.9651	20.381	19.0294
O08715	AKAP1_MOUSE	Akap1	A-kinase anchor protein 1, mitochondrial		0.451492	0.183235	10	10	10	19.7	19.7	19.7	92.194	0	30.765	34248000	47	20.6833	20.2131	20.2754	20.1766	20.4054	19.7894	20.23	20.4507
F7CUQ1	F7CUQ1_MOUSE	Bak1	Bcl-2 homologous antagonist/killer		0.041784	0.0320168	3	3	3	30.1	30.1	30.1	15.963	0	23.251	11958000	21	NaN	19.4995	19.2193	NaN	19.008	NaN	19.2242	NaN
O08749	DLDH_MOUSE	Dld	Dihydrolipoyl dehydrogenase, mitochondrial		0.045351	-0.0208411	24	24	24	56.2	56.2	56.2	54.272	0	193.74	614600000	390	23.7562	23.2525	23.248	23.3081	23.7025	23.5908	23.6351	23.6288
O08795	GLU2B_MOUSE	Prkcsh	Glucosidase 2 subunit beta		0.244303	-0.0463886	16	16	16	42	42	42	58.792	0	73.464	383680000	227	22.8303	22.8878	23.0476	22.7469	22.872	22.9276	22.7163	22.8312
O08807	PRDX4_MOUSE	Prdx4	Peroxiredoxin-4		2.28618	-0.448207	20	20	19	66.8	66.8	66.8	31.052	0	129.83	1553400000	431	24.6957	24.7995	24.916	24.6567	24.6992	25.3781	25.0956	25.2542
O08832	GALT4_MOUSE	Galnt4	Polypeptide N-acetylgalactosaminyltransferase 4		0	NaN	2	2	2	4.8	4.8	4.8	66.554	0	5.7434	1527300	6	NaN	NaN	NaN	NaN	NaN	NaN	NaN	NaN
O08912	GALT1_MOUSE	Galnt1	Polypeptide N-acetylgalactosaminyltransferase 1		1.20024	0.308558	17	17	17	35.2	35.2	35.2	64.254	0	73.904	196730000	146	22.5666	22.4879	22.1445	22.2395	22.3797	21.837	22.3963	22.0616
O08914	FAAH1_MOUSE	Faah	Fatty-acid amide hydrolase 1		0	NaN	2	2	2	4.5	4.5	4.5	63.221	0	5.1055	3926500	4	NaN	NaN	NaN	NaN	NaN	NaN	NaN	NaN
O08917	FLOT1_MOUSE	Flot1	Flotillin-1		0	0.284719	7	7	7	21.5	21.5	21.5	47.513	0	19.053	6786300	12	NaN	19.5128	19.2281	NaN	NaN	NaN	NaN	NaN
O08919	NUMBL_MOUSE	Numbl	Numb-like protein		0	NaN	1	1	1	1.7	1.7	1.7	64.13	0	3.3222	1834800	3	NaN	NaN	NaN	NaN	NaN	NaN	NaN	NaN
Q3TMX0	Q3TMX0_MOUSE	Sdcbp	Syntenin-1		1.02269	0.901183	5	5	5	22.8	22.8	22.8	32.251	0	12.158	31358000	34	20.4072	21.2866	20.1846	21.6966	21.3219	NaN	20.3692	NaN
O08997	ATOX1_MOUSE	Atox1	Copper transport protein ATOX1		0.588857	0.278299	5	5	5	58.8	58.8	58.8	7.3384	0	16.873	30711000	18	20.9725	21.304	NaN	NaN	NaN	20.6777	20.8118	21.0903
O09005	DEGS1_MOUSE	Degs1	Sphingolipid delta(4)-desaturase DES1		0	NaN	3	3	3	15.8	15.8	15.8	38.241	0	16.872	10408000	9	NaN	NaN	20.8422	NaN	NaN	NaN	NaN	20.4485
B0R030	B0R030_MOUSE	Snap23	Synaptosomal-associated protein (Fragment)		0.608304	0.385634	6	6	6	47.8	47.8	47.8	17.781	0	76.836	37886000	75	21.0926	21.254	20.9093	20.9614	20.1062	20.1704	20.4157	20.3763
O09061	PSB1_MOUSE	Psmb1	Proteasome subunit beta type-1		0.764696	-0.390659	6	6	6	32.1	32.1	32.1	26.372	0	23.184	34649000	25	20.2128	21.3051	21.4067	20.8786	21.1541	21.3828	21.217	21.1066
O09111	NDUBB_MOUSE	Ndufb11	NADH dehydrogenase [ubiquinone] 1 beta subcomplex subunit 11, mitochondrial		0.151465	0.180641	7	7	7	51.7	51.7	51.7	17.444	0	23.892	31465000	33	21.6423	20.8145	21.6765	21.3857	21.6845	21.644	NaN	20.2829
O09117	SYPL1_MOUSE	Sypl1	Synaptophysin-like protein 1		0.0129837	-0.0130796	2	2	2	13	13	13	28.899	0	14.173	118240000	48	23.0229	23.0594	23.7761	22.9206	24.0739	22.8192	23.4302	23.1037
O09131	GSTO1_MOUSE	Gsto1	Glutathione S-transferase omega-1		0.114682	0.112453	9	9	9	30.4	30.4	30.4	27.497	0	13.857	31103000	28	20.5015	21.8394	21.5433	21.1111	21.1917	20.5088	21.3501	20.7917
O09159	MA2B1_MOUSE	Man2b1	Lysosomal alpha-mannosidase		0	NaN	3	3	3	3.6	3.6	3.6	114.65	0	7.2185	3691200	5	NaN	NaN	NaN	NaN	NaN	NaN	NaN	NaN
O09165	CASQ1_MOUSE	Casq1	Calsequestrin-1		0	NaN	3	3	3	11.4	11.4	11.4	46.377	0	24.593	12723000	17	NaN	20.477	NaN	NaN	20.9368	NaN	NaN	NaN
F6VNW5	F6VNW5_MOUSE	Gclm	GCS light chain (Fragment)		0	NaN	1	1	1	8.5	8.5	8.5	16.997	0	5.5514	3873900	8	NaN	NaN	NaN	NaN	NaN	NaN	NaN	NaN
O35083	PLCA_MOUSE	Agpat1	1-acyl-sn-glycerol-3-phosphate acyltransferase alpha		0.109022	0.0585232	5	5	5	29.5	29.5	29.5	31.709	0	31.156	213870000	85	24.0251	24.0552	24.1784	23.8118	23.6703	23.8097	23.9862	23.3541
O35114	SCRB2_MOUSE	Scarb2	Lysosome membrane protein 2		1.13438	0.281647	10	10	10	20.5	20.5	20.5	54.043	0	35.423	99892000	70	22.8282	22.8636	22.476	23.0236	22.4578	22.6529	22.5048	22.413
O35129	PHB2_MOUSE	Phb2	Prohibitin-2		0.976422	0.186671	24	24	24	84.3	84.3	84.3	33.296	0	170.63	1782400000	603	26.0774	25.7768	25.7652	25.9596	26.0357	25.8968	25.5765	25.8643
A0A1B0GT05	A0A1B0GT05_MOUSE	Gm45785	Predicted gene 45785		0.0180634	-0.00712729	4	4	4	42.6	42.6	42.6	10.446	0	10.041	36007000	32	21.2757	21.3584	21.2656	21.401	20.9654	21.4596	21.2853	21.0186
A2A9I0	A2A9I0_MOUSE	Gosr2	Golgi SNAP receptor complex member 2		0.744199	-0.325066	5	5	5	26.1	26.1	26.1	19.571	0	9.6467	71176000	37	22.5486	22.0145	22.5484	22.9171	22.4027	22.7357	22.846	23.0529
O35215	DOPD_MOUSE	Ddt	D-dopachrome decarboxylase		1.12731	-0.291507	8	8	8	79.7	79.7	79.7	13.077	0	29.997	87137000	55	22.5048	21.9623	22.5975	22.0023	22.2935	22.465	22.4795	22.387
O35226	PSMD4_MOUSE	Psmd4	26S proteasome non-ATPase regulatory subunit 4		0	NaN	3	3	3	11.4	11.4	11.4	40.703	0	66.097	7358300	10	NaN	NaN	NaN	NaN	NaN	NaN	NaN	NaN
A0A0G2JG10	A0A0G2JG10_MOUSE	Dhx15	RNA helicase		0	NaN	3	3	3	3.8	3.8	3.8	68.578	0	4.6551	706760	4	NaN	NaN	NaN	NaN	NaN	NaN	NaN	NaN
O35295	PURB_MOUSE	Purb	Transcriptional activator protein Pur-beta		0	NaN	1	1	1	6.5	6.5	6.5	33.901	0	26.62	2136000	4	NaN	NaN	NaN	NaN	NaN	NaN	NaN	NaN
O35326	SRSF5_MOUSE	Srsf5	Serine/arginine-rich splicing factor 5		0	NaN	3	2	2	13.4	10	10	30.891	0	22.295	7546000	11	NaN	NaN	NaN	NaN	NaN	19.8032	19.1745	19.7704
A0A494BBB0	A0A494BBB0_MOUSE	Capn1	Calcium-activated neutral proteinase 1 (Fragment)		0	NaN	1	1	1	1.7	1.7	1.7	80.362	0	4.5228	952170	2	NaN	NaN	NaN	NaN	NaN	NaN	NaN	NaN
F6UFG6	F6UFG6_MOUSE	Anp32a	Acidic leucine-rich nuclear phosphoprotein 32 family member A (Fragment)		0.194626	0.108203	7	7	5	45.7	45.7	34.1	15.306	0	16.654	24168000	30	20.6375	20.2449	20.3025	19.9136	20.1169	19.8786	20.4681	19.8309
Q8C391	Q8C391_MOUSE	Exoc4	Exocyst complex component Sec8		0	NaN	1	1	1	3.8	3.8	3.8	57.299	0	3.0909	291490	1	NaN	NaN	NaN	NaN	NaN	NaN	NaN	NaN
A0A0G2JEE6	A0A0G2JEE6_MOUSE	Hax1	HCLS1-associated protein X-1		0	NaN	1	1	1	7.3	7.3	7.3	17.086	0.0047829	1.8599	1204200	11	NaN	NaN	NaN	NaN	NaN	NaN	NaN	NaN
O35405	PLD3_MOUSE	Pld3	5-3 exonuclease PLD3		0	NaN	4	4	4	8.8	8.8	8.8	54.388	0	5.697	6010000	8	NaN	NaN	NaN	NaN	NaN	NaN	NaN	NaN
O35435	PYRD_MOUSE	Dhodh	Dihydroorotate dehydrogenase (quinone), mitochondrial		0.591332	-0.14255	17	17	17	51.6	51.6	51.6	42.699	0	86.948	123340000	97	22.3378	21.9765	22.0616	21.9827	21.8558	22.2269	22.1625	22.272
O35459	ECH1_MOUSE	Ech1	Delta(3,5)-Delta(2,4)-dienoyl-CoA isomerase, mitochondrial		0.00153761	-0.00116587	5	5	5	19.9	19.9	19.9	36.118	0	29.647	20516000	27	20.8901	21.4611	21.4221	21.4081	21.817	NaN	21.6043	21.1594
O35465	FKBP8_MOUSE	Fkbp8	Peptidyl-prolyl cis-trans isomerase FKBP8		1.25436	-0.569655	8	8	8	23.1	23.1	23.1	43.528	0	49.403	34543000	34	20.6321	20.1201	20.7453	20.9169	20.8795	21.3828	21.2973	21.4017
A0A1B0GRG3	A0A1B0GRG3_MOUSE	Cd151	CD151 antigen (Fragment)		0	NaN	1	1	1	10.7	10.7	10.7	16.784	0.0011364	2.2123	1649200	4	NaN	NaN	NaN	NaN	NaN	NaN	NaN	NaN
O35598	ADA10_MOUSE	Adam10	Disintegrin and metalloproteinase domain-containing protein 10		0	-0.0550957	7	7	7	14.6	14.6	14.6	83.967	0	27.985	12878000	16	20.3409	NaN	NaN	NaN	NaN	20.396	NaN	NaN
O35604	NPC1_MOUSE	Npc1	NPC intracellular cholesterol transporter 1		0	NaN	3	3	3	2.9	2.9	2.9	142.88	0	9.0128	6577900	7	NaN	NaN	NaN	NaN	NaN	NaN	NaN	NaN
E9Q855	E9Q855_MOUSE	Scamp3	Secretory carrier-associated membrane protein		0.238417	0.0687757	5	5	5	27	27	27	34.515	0	73.773	48378000	32	21.852	22.0782	22.099	22.0421	21.9716	21.627	22.045	21.8977
O35623	BET1_MOUSE	Bet1	BET1 homolog		1.34968	-0.306205	5	5	5	60.2	60.2	60.2	13.274	0	91.205	78827000	45	21.2869	21.2332	21.5029	21.3264	21.3866	21.9543	21.4321	21.5686
O35639	ANXA3_MOUSE	Anxa3	Annexin A3		0.000395317	0.000331084	5	5	5	18.3	18.3	18.3	36.384	0	25.167	28660000	31	20.0366	21.0982	20.5783	20.8177	NaN	20.8311	20.5453	20.6473
Q5SVG5	Q5SVG5_MOUSE	Ap1b1	AP complex subunit beta		0.33409	-0.287372	28	9	9	31	12.8	12.8	101.19	0	24.377	44617000	45	21.0708	21.3575	21.1385	19.9187	21.3731	21.1457	20.9998	21.5857
O35678	MGLL_MOUSE	Mgll	Monoglyceride lipase		0.343985	-0.436633	5	5	5	22.1	22.1	22.1	33.387	0	25.885	13351000	16	20.561	19.9654	21.3052	NaN	NaN	NaN	20.0807	20.7136
O35682	MYADM_MOUSE	Myadm	Myeloid-associated differentiation marker		0	0.467374	2	2	2	10.3	10.3	10.3	35.284	0	29.343	45372000	35	22.1376	NaN	21.9947	NaN	NaN	21.2044	22.0569	21.4249
O35683	NDUA1_MOUSE	Ndufa1	NADH dehydrogenase [ubiquinone] 1 alpha subcomplex subunit 1		0	0.537897	1	1	1	14.3	14.3	14.3	8.1384	0	11.812	26265000	21	22.3555	NaN	NaN	NaN	NaN	NaN	NaN	21.8176
O35685	NUDC_MOUSE	Nudc	Nuclear migration protein nudC		0	NaN	2	2	2	7.2	7.2	7.2	38.358	0	4.6975	1659200	4	NaN	NaN	NaN	NaN	NaN	NaN	NaN	NaN
O35704	SPTC1_MOUSE	Sptlc1	Serine palmitoyltransferase 1		0.19476	0.0658312	11	11	11	29	29	29	52.534	0	91.574	61298000	77	21.0304	21.0425	20.7442	21.2035	21.1596	21.1458	21.3304	20.9523
Q8C2Q7	Q8C2Q7_MOUSE	Hnrnph1	Heterogeneous nuclear ribonucleoprotein H		0.227102	-0.136941	6	4	4	18.6	12.9	12.9	51.217	0	70.784	19293000	20	20.03	NaN	NaN	20.5273	NaN	20.4095	20.237	20.6002
O35744	CHIL3_MOUSE	Chil3	Chitinase-like protein 3		0	NaN	5	5	5	10.3	10.3	10.3	44.458	0	10.531	2736200	6	NaN	NaN	NaN	NaN	NaN	NaN	NaN	NaN
O35855	BCAT2_MOUSE	Bcat2	Branched-chain-amino-acid aminotransferase, mitochondrial		0.0552677	-0.0234642	15	15	15	49.9	49.9	49.9	44.127	0	54.397	245150000	122	23.2438	23.0279	22.8877	23.4414	23.2186	23.3944	23.3473	23.3961
O35857	TIM44_MOUSE	Timm44	Mitochondrial import inner membrane translocase subunit TIM44		0	NaN	8	8	8	17.5	17.5	17.5	51.091	0	16.332	10985000	14	NaN	NaN	NaN	NaN	NaN	20.2432	20.265	19.6954
O35864	CSN5_MOUSE	Cops5	COP9 signalosome complex subunit 5		0	NaN	1	1	1	3	3	3	37.548	0	2.6505	1085700	4	NaN	NaN	NaN	NaN	NaN	NaN	NaN	NaN
O35874	SATT_MOUSE	Slc1a4	Neutral amino acid transporter A		0.761166	-0.278557	4	4	4	12.8	12.8	12.8	56.061	0	125.47	44089000	43	20.9245	20.8692	21.4042	NaN	20.8896	20.9974	20.848	21.4424
O35887	CALU_MOUSE	Calu	Calumenin		0.975318	-0.285281	20	20	3	55.6	55.6	7.6	37.063	0	169.18	463780000	413	23.1334	22.5782	23.3693	23.0256	22.8403	23.2777	23.0889	22.9826
A0A1B0GQZ1	A0A1B0GQZ1_MOUSE	Mrpl23	39S ribosomal protein L23, mitochondrial		0	NaN	2	2	2	27.7	27.7	27.7	11.89	0	11.121	9070200	20	NaN	NaN	NaN	NaN	NaN	NaN	NaN	NaN
O35988	SDC4_MOUSE	Sdc4	Syndecan-4		0	0.117036	3	3	3	16.7	16.7	16.7	21.482	0	15.602	6838100	22	NaN	NaN	18.9922	19.449	NaN	19.7903	NaN	19.2133
O54692	ZW10_MOUSE	Zw10	Centromere/kinetochore protein zw10 homolog		0	NaN	9	9	9	14.6	14.6	14.6	88.062	0	110.24	73890000	19	NaN	NaN	NaN	NaN	NaN	NaN	NaN	NaN
O54724	CAVN1_MOUSE	Cavin1	Caveolae-associated protein 1		0.0256827	0.0202694	19	19	19	51.8	51.8	51.8	43.953	0	275.71	261400000	209	22.3104	22.4572	22.9307	22.1437	22.62	21.8799	22.6285	22.0111
O54734	OST48_MOUSE	Ddost	Dolichyl-diphosphooligosaccharide--protein glycosyltransferase 48 kDa subunit		0.331657	-0.0729327	20	20	20	58.3	58.3	58.3	49.027	0	211.37	2485500000	470	25.9657	25.9528	26.1896	26.2446	25.9949	26.0571	26.2413	25.9618
O54774	AP3D1_MOUSE	Ap3d1	AP-3 complex subunit delta-1		0	NaN	5	5	5	4.6	4.6	4.6	135.08	0	5.6689	15084000	6	NaN	NaN	NaN	NaN	NaN	NaN	NaN	NaN
E9PZI9	E9PZI9_MOUSE	Cd200	OX-2 membrane glycoprotein		0	NaN	1	1	1	9.3	9.3	9.3	14.307	0	4.5181	878320	1	NaN	NaN	NaN	NaN	NaN	NaN	NaN	NaN
O54931	AKAP2_MOUSE	Akap2	A-kinase anchor protein 2		0	NaN	3	3	3	5.3	5.3	5.3	98.577	0	20.333	1997200	5	NaN	NaN	NaN	NaN	NaN	18.2552	NaN	18.0502
D3Z141	D3Z141_MOUSE	Lgals7	Galectin (Fragment)		0	NaN	2	2	2	22.1	22.1	22.1	9.5176	0	4.467	3936800	4	NaN	NaN	NaN	NaN	NaN	NaN	NaN	NaN
O54984	GET3_MOUSE	Get3	ATPase GET3		0	-0.446434	4	4	4	11.2	11.2	11.2	38.822	0	10.839	6374500	10	20.1939	NaN	20.6753	20.2638	NaN	NaN	NaN	NaN
O55013	TPPC3_MOUSE	Trappc3	Trafficking protein particle complex subunit 3		0	NaN	1	1	1	7.8	7.8	7.8	20.302	0	4.6357	366370	1	NaN	NaN	NaN	NaN	NaN	NaN	NaN	NaN
O55022	PGRC1_MOUSE	Pgrmc1	Membrane-associated progesterone receptor component 1		1.07236	0.383475	9	8	8	59	54.4	54.4	21.694	0	49.551	142750000	91	23.9447	24.0167	23.9222	24.2257	23.8111	23.7415	23.1534	23.6472
Q924B0	Q924B0_MOUSE	Impa1	Inositol-1-monophosphatase		0	NaN	4	4	4	17	17	17	30.429	0	16.966	9341400	13	NaN	NaN	NaN	NaN	NaN	19.8163	19.7579	19.9676
O55026	ENTP2_MOUSE	Entpd2	Ectonucleoside triphosphate diphosphohydrolase 2		0.114703	0.13863	4	4	4	9.9	9.9	9.9	54.319	0	12.588	10804000	15	19.8856	NaN	20.6341	20.2271	NaN	19.3968	20.1074	19.5325
O55029	COPB2_MOUSE	Copb2	Coatomer subunit beta		0.262965	-0.127961	23	23	23	35.2	35.2	35.2	102.45	0	123.4	121540000	123	21.46	21.2787	21.0487	21.4211	20.9118	21.3923	21.3363	21.8061
O55100	SNG1_MOUSE	Syngr1	Synaptogyrin-1		0.450513	0.49137	2	2	2	10.3	10.3	10.3	25.652	0	10.628	33370000	27	21.6865	21.895	21.8643	21.1918	21.5843	21.5458	21.23	19.7521
O55106	STRN_MOUSE	Strn	Striatin		0	NaN	7	7	7	14.9	14.9	14.9	85.965	0	24.981	4959400	9	NaN	NaN	NaN	NaN	NaN	NaN	NaN	NaN
O55111	DSG2_MOUSE	Dsg2	Desmoglein-2		0	NaN	5	5	5	6.2	6.2	6.2	122.38	0	17.089	4627000	12	NaN	NaN	NaN	NaN	NaN	18.8803	18.7292	18.4916
O55126	NIPS2_MOUSE	Nipsnap2	Protein NipSnap homolog 2		1.02529	0.295208	6	6	6	22.1	22.1	22.1	32.932	0	12.376	48872000	51	21.057	21.1701	20.6819	21.2533	21.3487	21.2031	21.0813	20.6819
O55131	SEPT7_MOUSE	Septin7	Septin-7		0.754418	-0.171392	5	5	5	13.5	13.5	13.5	50.549	0	9.3555	8073800	22	18.7523	18.6686	18.9036	NaN	NaN	18.7331	18.8361	19.0549
O55137	ACOT1_MOUSE	Acot1	Acyl-coenzyme A thioesterase 1		1.7329	-0.600884	7	7	2	15.5	15.5	3.1	46.135	0	13.527	39105000	24	20.5652	19.9194	20.5715	20.1893	19.8971	21.0476	20.6916	20.6639
O55142	RL35A_MOUSE	Rpl35a	60S ribosomal protein L35a		0.577817	-0.177181	16	16	16	67.3	67.3	67.3	12.554	0	31.35	1999300000	516	25.2216	25.3074	25.1957	25.4758	25.4096	25.7098	25.7738	25.4438
O55143	AT2A2_MOUSE	Atp2a2	Sarcoplasmic/endoplasmic reticulum calcium ATPase 2		2.35212	0.539038	53	53	33	51.2	51.2	35.4	114.86	0	323.31	1552000000	866	24.3039	24.5847	24.1181	24.6932	24.764	23.9866	24.1951	23.8899
O55222	ILK_MOUSE	Ilk	Integrin-linked protein kinase		0	NaN	2	2	2	3.5	3.5	3.5	51.373	0	2.9267	1262100	5	NaN	NaN	NaN	NaN	NaN	NaN	NaN	NaN
O55234	PSB5_MOUSE	Psmb5	Proteasome subunit beta type-5		0.197514	-0.177858	9	9	9	35.6	35.6	35.6	28.532	0	43.118	58683000	43	20.8637	21.1325	20.3944	20.7209	21.3961	21.7685	21.6785	20.9833
O55242	SGMR1_MOUSE	Sigmar1	Sigma non-opioid intracellular receptor 1		0.144792	-0.0681558	4	4	4	17.9	17.9	17.9	25.25	0	5.4346	50877000	29	NaN	NaN	21.9243	21.6534	21.6193	21.8264	21.6766	21.3908
O70133	DHX9_MOUSE	Dhx9	ATP-dependent RNA helicase A		0	NaN	1	1	1	1.2	1.2	1.2	149.47	0	2.9488	288560	2	NaN	NaN	NaN	NaN	NaN	NaN	NaN	NaN
O70152	DPM1_MOUSE	Dpm1	Dolichol-phosphate mannosyltransferase subunit 1		0.0844149	0.0348644	12	12	12	56.2	56.2	56.2	29.174	0	47.942	245960000	118	23.8456	23.6674	24.1345	23.9506	23.7615	23.731	23.7497	23.4705
O70194	EIF3D_MOUSE	Eif3d	Eukaryotic translation initiation factor 3 subunit D		0	NaN	3	3	3	6.2	6.2	6.2	63.988	0	5.2308	1984700	4	NaN	NaN	NaN	NaN	NaN	NaN	NaN	NaN
A0A087WPM8	A0A087WPM8_MOUSE	Hmx1	Homeobox protein HMX1 (Fragment)		0	NaN	1	1	1	9.9	9.9	9.9	14.864	0.0037216	1.9514	884020	1	NaN	NaN	NaN	NaN	NaN	NaN	NaN	NaN
Q8C4G3	Q8C4G3_MOUSE	Atp9a	Phospholipid-transporting ATPase		0	NaN	3	2	2	3.7	2.6	2.6	116.42	0	28.987	1205500	0	NaN	NaN	NaN	NaN	NaN	NaN	NaN	NaN
O70251	EF1B_MOUSE	Eef1b	Elongation factor 1-beta		0.284408	-0.078434	10	8	8	62.7	57.3	57.3	24.693	0	158.51	164980000	73	22.8932	22.7016	22.6593	22.4111	22.5423	22.6517	22.6932	22.8578
O70252	HMOX2_MOUSE	Hmox2	Heme oxygenase 2		1.50249	-1.20351	12	12	12	46.7	46.7	46.7	35.738	0	45.273	52989000	45	20.6095	20.28	20.9991	20.8843	19.8616	21.749	21.0966	22.6046
F6WKE4	F6WKE4_MOUSE	Sgce	Epsilon-sarcoglycan		0	NaN	1	1	1	2.5	2.5	2.5	44.939	0.0011329	2.1517	249890	1	NaN	NaN	NaN	NaN	NaN	NaN	NaN	NaN
O70274	TP4A2_MOUSE	Ptp4a2	Protein tyrosine phosphatase type IVA 2		0	NaN	2	2	2	16.2	16.2	16.2	19.127	0	2.7734	3285900	8	NaN	NaN	NaN	NaN	NaN	NaN	NaN	NaN
O70302	CIDEA_MOUSE	Cidea	Cell death activator CIDE-A		0.019476	-0.0417666	3	3	3	14.7	14.7	14.7	24.669	0	3.8371	17423000	14	20.7336	NaN	19.37	20.7762	NaN	21.3113	21.2646	21.2406
O70309	ITB5_MOUSE	Itgb5	Integrin beta-5		0	NaN	2	2	2	3.9	3.9	3.9	87.908	0	7.9735	2099900	2	NaN	NaN	NaN	NaN	NaN	NaN	NaN	NaN
O70310	NMT1_MOUSE	Nmt1	Glycylpeptide N-tetradecanoyltransferase 1		0	NaN	1	1	1	2.6	2.6	2.6	56.888	0	3.0809	0	1	NaN	NaN	NaN	NaN	NaN	NaN	NaN	NaN
Q80UE5	Q80UE5_MOUSE	Epb41l2	Band 4.1-like protein 2		0	0.486347	9	9	9	10.3	10.3	10.3	101.81	0	49.077	9451100	18	18.5557	NaN	NaN	NaN	NaN	18.0694	NaN	NaN
S4R1E5	S4R1E5_MOUSE	Gpx4	Glutathione peroxidase		1.23749	0.407867	9	9	9	57.3	57.3	57.3	17.937	0	18.105	60400000	53	22.2939	23.0102	22.5203	22.752	22.776	22.0994	22.3471	22.2338
O70378	EMC8_MOUSE	Emc8	ER membrane protein complex subunit 8		1.53157	0.333784	11	11	11	58	58	58	23.348	0	114.16	123130000	108	22.0688	21.8005	21.4695	21.8688	21.6102	21.4028	21.7074	21.4336
O70400	PDLI1_MOUSE	Pdlim1	PDZ and LIM domain protein 1		0	0.327023	7	7	7	35.5	35.5	35.5	35.774	0	12.053	43458000	26	NaN	22.4975	21.8847	22.2142	21.9235	NaN	NaN	NaN
O70404	VAMP8_MOUSE	Vamp8	Vesicle-associated membrane protein 8		0.57687	0.158092	8	8	8	54.5	54.5	54.5	11.451	0	48.268	138340000	92	22.1869	22.2955	22.1675	21.9959	21.9597	21.6931	22.0364	21.9086
O70423	AOC3_MOUSE	Aoc3	Membrane primary amine oxidase		0.185381	0.165955	27	27	27	45.9	45.9	45.9	84.533	0	155.7	861990000	392	24.9542	24.8061	25.7196	24.9518	25.3753	24.165	24.9345	24.6044
O70435	PSA3_MOUSE	Psma3	Proteasome subunit alpha type-3		0	NaN	5	5	5	21.2	21.2	21.2	28.405	0	15.891	30681000	23	NaN	NaN	NaN	NaN	NaN	20.8639	20.8006	21.0183
Q8BH40	Q8BH40_MOUSE	Stx7	Syntaxin-7		0.254442	0.0753622	10	10	10	47.9	47.9	47.9	29.736	0	58.098	106700000	81	21.7395	21.818	21.6975	21.6695	21.3612	21.4819	21.6791	21.4283
O70456	1433S_MOUSE	Sfn	14-3-3 protein sigma		0	NaN	6	3	3	24.2	14.1	14.1	27.706	0	3.156	32480000	26	NaN	NaN	NaN	NaN	NaN	NaN	NaN	NaN
O70480	VAMP4_MOUSE	Vamp4	Vesicle-associated membrane protein 4		0.639681	0.286592	4	4	4	26.2	26.2	26.2	16.353	0	24.218	10355000	15	19.384	19.8813	19.3993	NaN	19.1688	19.1502	18.9506	19.2657
Q78ZM0	Q78ZM0_MOUSE	Snx3	Sorting nexin-3		0	NaN	4	4	3	21.6	21.6	17.3	18.762	0	6.8327	14161000	20	NaN	NaN	NaN	NaN	NaN	20.0352	19.97	20.0952
O70496	CLCN7_MOUSE	Clcn7	H(+)/Cl(-) exchange transporter 7		0	NaN	2	2	2	3.9	3.9	3.9	88.712	0	3.1594	2408900	2	NaN	NaN	NaN	NaN	NaN	19.7908	NaN	19.7629
O70503	DHB12_MOUSE	Hsd17b12	Very-long-chain 3-oxoacyl-CoA reductase		0.225701	-0.116174	23	23	23	64.1	64.1	64.1	34.741	0	162.7	2355900000	864	25.6031	25.8516	25.4126	25.7376	26.0823	26.2293	26.0012	26.0962
O70570	PIGR_MOUSE	Pigr	Polymeric immunoglobulin receptor		0.345531	-0.156427	23	23	23	31.9	31.9	31.9	84.998	0	178.09	194660000	186	22.114	21.7244	22.0825	21.5593	21.5306	21.567	21.7435	22.1609
O70572	NSMA_MOUSE	Smpd2	Sphingomyelin phosphodiesterase 2		0.962316	0.318837	5	5	5	15.3	15.3	15.3	47.466	0	7.8007	21418000	22	20.8361	21.2524	20.9515	20.8128	20.9639	20.5419	20.771	20.3254
O70579	PM34_MOUSE	Slc25a17	Peroxisomal membrane protein PMP34		0	NaN	1	1	1	2.9	2.9	2.9	34.412	0	3.0179	5343000	5	NaN	NaN	NaN	NaN	NaN	NaN	NaN	NaN
G3UY34	G3UY34_MOUSE	Dtnb	Dystrobrevin		0	NaN	4	4	4	6.7	6.7	6.7	67.762	0	8.2236	4613300	8	NaN	NaN	NaN	NaN	NaN	18.7541	19.1701	18.6776
A0A067XG53	A0A067XG53_MOUSE	Cask	Peripheral plasma membrane protein CASK (Fragment)		0	NaN	4	4	4	5.7	5.7	5.7	99.226	0	18.481	4387400	7	NaN	NaN	NaN	NaN	NaN	19.6881	NaN	18.8744
O70622	RTN2_MOUSE	Rtn2	Reticulon-2		0	NaN	3	3	3	7.6	7.6	7.6	51.346	0	6.7562	3397200	6	NaN	NaN	NaN	20.5471	21.2861	NaN	NaN	NaN
O88207	CO5A1_MOUSE	Col5a1	Collagen alpha-1(V) chain		0	NaN	1	1	1	0.7	0.7	0.7	183.67	0	4.0983	0	1	NaN	NaN	NaN	NaN	NaN	NaN	NaN	NaN
O88307	SORL_MOUSE	Sorl1	Sortilin-related receptor		0	NaN	4	4	4	2.1	2.1	2.1	247.08	0	7.7667	1242000	5	NaN	NaN	NaN	NaN	NaN	NaN	NaN	NaN
O88342	WDR1_MOUSE	Wdr1	WD repeat-containing protein 1		1.14356	-0.498828	21	21	21	42.9	42.9	42.9	66.406	0	62.032	139730000	98	21.9496	21.9365	21.9509	21.8134	21.1145	22.0932	22.4637	22.3015
Q91XH6	Q91XH6_MOUSE	Vti1b	Vesicle transport through interaction with t-SNAREs 1B homolog		0.573534	-0.319123	7	7	7	38.8	38.8	38.8	26.727	0	24.603	57639000	45	21.8861	21.8043	21.3948	21.1827	21.4009	22.2206	21.7265	22.2086
O88441	MTX2_MOUSE	Mtx2	Metaxin-2		0.633262	-0.337118	11	11	11	45.6	45.6	45.6	29.758	0	39.217	71406000	75	21.9524	21.601	22.2979	21.6706	20.9506	21.7728	21.7606	21.6917
O88455	DHCR7_MOUSE	Dhcr7	7-dehydrocholesterol reductase		1.35494	0.430323	6	6	6	16.3	16.3	16.3	53.918	0	17.044	151730000	49	23.1159	22.8407	22.8846	22.9492	23.1214	22.2774	22.8005	22.3435
A0A0R4J1C2	A0A0R4J1C2_MOUSE	Capns1	Calcium-activated neutral proteinase small subunit		0	NaN	1	1	1	5	5	5	22.924	0	3.1486	305040	1	NaN	NaN	NaN	NaN	NaN	NaN	NaN	NaN
A2BFF8	A2BFF8_MOUSE	Dync1i2	Cytoplasmic dynein 1 intermediate chain 2		0.418877	0.164528	5	5	5	11.3	11.3	11.3	68.265	0	28.697	11170000	39	19.3871	19.6861	19.4512	19.3589	19.4811	19.5238	19.4356	18.8445
O88492	PLIN4_MOUSE	Plin4	Perilipin-4		0.213073	0.121179	4	4	4	15.7	15.7	15.7	139.41	0	29.382	7947100	13	NaN	20.2403	20.351	NaN	20.3013	NaN	19.9482	NaN
O88512	AP1G2_MOUSE	Ap1g2	AP-1 complex subunit gamma-like 2		0	NaN	1	1	1	1.3	1.3	1.3	87.862	0.0040816	1.9337	734140	1	NaN	NaN	NaN	NaN	NaN	NaN	NaN	NaN
O88531	PPT1_MOUSE	Ppt1	Palmitoyl-protein thioesterase 1		0	NaN	1	1	1	4.9	4.9	4.9	34.49	0	3.5195	4150500	7	NaN	NaN	NaN	NaN	NaN	NaN	NaN	NaN
F6QTS1	F6QTS1_MOUSE	Cops4	COP9 signalosome complex subunit 4 (Fragment)		0	NaN	2	2	2	10.7	10.7	10.7	29.167	0	5.3821	1449000	6	NaN	NaN	NaN	NaN	NaN	NaN	NaN	NaN
O88561	S27A3_MOUSE	Slc27a3	Solute carrier family 27 member 3		0.0396493	0.025106	17	17	17	25.9	25.9	25.9	72.964	0	113.38	272220000	141	22.6957	22.5333	21.9675	22.3663	22.6708	22.7425	22.9165	22.5392
O88569	ROA2_MOUSE	Hnrnpa2b1	Heterogeneous nuclear ribonucleoproteins A2/B1		0.200348	-0.11011	6	6	6	22.7	22.7	22.7	37.402	0	19.67	21390000	49	19.9908	20.4243	20.116	19.726	NaN	20.1722	19.9003	20.44
O88587	COMT_MOUSE	Comt	Catechol O-methyltransferase		0.0150769	-0.00917959	7	7	7	37.4	37.4	37.4	29.486	0	34.841	64071000	44	21.485	22.0487	22.189	21.8568	22.2757	21.7311	21.7142	22.0686
O88630	GOSR1_MOUSE	Gosr1	Golgi SNAP receptor complex member 1		0.76584	-0.207029	5	5	5	22.8	22.8	22.8	28.489	0	18.233	71424000	52	21.7569	22.0796	21.9541	21.8222	22.1864	22.109	22.3241	22.286
O88653	LTOR3_MOUSE	Lamtor3	Ragulator complex protein LAMTOR3		0.474479	-0.351937	3	3	3	50	50	50	13.553	0	25.729	72160000	25	22.9706	22.7436	22.7478	NaN	NaN	23.0812	23.7521	23.2549
O88685	PRS6A_MOUSE	Psmc3	26S proteasome regulatory subunit 6A		0	NaN	7	7	7	22.2	22.2	22.2	49.548	0	30.564	13703000	16	NaN	NaN	NaN	NaN	NaN	21.1684	21.7075	21.3427
O88696	CLPP_MOUSE	Clpp	ATP-dependent Clp protease proteolytic subunit, mitochondrial		0	0.0378819	4	4	4	18.8	18.8	18.8	29.8	0	34.409	15266000	19	NaN	NaN	20.4684	NaN	20.5063	NaN	NaN	NaN
O88736	DHB7_MOUSE	Hsd17b7	3-keto-steroid reductase/17-beta-hydroxysteroid dehydrogenase 7		0.310138	-0.636039	5	5	5	22.8	22.8	22.8	37.316	0	115.27	11096000	13	NaN	NaN	20.8355	20.498	19.0675	NaN	19.4762	20.9448
S4R1L5	S4R1L5_MOUSE	Birc6	Baculoviral IAP repeat-containing protein 6		0	NaN	1	1	1	0.2	0.2	0.2	529.32	0	2.8104	376460	1	NaN	NaN	NaN	NaN	NaN	NaN	NaN	NaN
O88746	TOM1_MOUSE	Tom1	Target of Myb protein 1		0	NaN	3	3	3	10	10	10	54.325	0	4.7927	2058600	6	NaN	NaN	NaN	NaN	NaN	NaN	NaN	NaN
O88792	JAM1_MOUSE	F11r	Junctional adhesion molecule A		0.84795	0.298319	5	5	5	17.7	17.7	17.7	32.423	0	16.342	32901000	42	NaN	21.2016	21.3551	21.4685	21.4362	20.7185	21.0752	21.133
O88822	SC5D_MOUSE	Sc5d	Lathosterol oxidase		0	NaN	3	3	3	11.4	11.4	11.4	35.062	0	5.9992	4235500	26	NaN	NaN	NaN	NaN	NaN	18.807	NaN	18.8356
D3Z4D1	D3Z4D1_MOUSE	Jtb	Protein JTB		0	NaN	1	1	1	13.7	13.7	13.7	10.478	0	4.5743	13314000	14	NaN	NaN	NaN	NaN	NaN	NaN	NaN	NaN
O88844	IDHC_MOUSE	Idh1	Isocitrate dehydrogenase [NADP] cytoplasmic		0	NaN	5	4	4	13.5	11.4	11.4	46.674	0	11.988	3679400	7	NaN	NaN	NaN	NaN	NaN	NaN	NaN	NaN
O88947	FA10_MOUSE	F10	Coagulation factor X		0	NaN	1	1	1	2.3	2.3	2.3	54.017	0.0003861	2.4701	780100	1	NaN	NaN	NaN	NaN	NaN	NaN	NaN	NaN
O88952	LIN7C_MOUSE	Lin7c	Protein lin-7 homolog C		0.328827	-0.15725	6	6	5	38.1	38.1	33	21.834	0	13.569	36208000	25	20.5281	20.6196	20.7112	20.895	21.1378	20.9522	21.3732	20.7731
O88967	YMEL1_MOUSE	Yme1l1	ATP-dependent zinc metalloprotease YME1L1		1.33667	0.542321	12	12	12	23.4	23.4	23.4	80.027	0	47.274	35136000	44	20.7379	20.6143	20.2412	20.3111	20.5219	19.436	20.2928	20.0459
O88968	TCO2_MOUSE	Tcn2	Transcobalamin-2		0	NaN	2	2	2	4.2	4.2	4.2	47.585	0	3.6346	4899100	10	NaN	NaN	NaN	NaN	NaN	19.6344	19.3357	19.652
O88983	STX8_MOUSE	Stx8	Syntaxin-8		0	0.337779	5	5	5	23.3	23.3	23.3	26.925	0	10.415	6813900	16	19.2515	NaN	NaN	NaN	NaN	18.7891	19.0385	NaN
A0A2R8VHE4	A0A2R8VHE4_MOUSE	Gcat	2-amino-3-ketobutyrate coenzyme A ligase, mitochondrial (Fragment)		0	NaN	2	2	2	15.4	15.4	15.4	24.308	0	9.744	5660800	11	NaN	NaN	NaN	NaN	NaN	20.0378	NaN	19.7096
O89023	TPP1_MOUSE	Tpp1	Tripeptidyl-peptidase 1		0	-0.10046	3	3	3	8.7	8.7	8.7	61.341	0	11.926	19494000	18	NaN	NaN	21.6641	NaN	21.7293	21.9226	21.7958	21.9367
O89051	ITM2B_MOUSE	Itm2b	Integral membrane protein 2B		0.0546812	-0.0302901	5	5	5	18.4	18.4	18.4	30.26	0	33.045	35840000	28	22.2771	22.0131	22.5384	22.2913	22.6356	22.4787	21.8976	22.4236
O89053	COR1A_MOUSE	Coro1a	Coronin-1A		0	-0.248285	5	5	5	11.3	11.3	11.3	50.989	0	6.775	5157300	15	NaN	19.0487	NaN	NaN	NaN	19.4751	NaN	19.1189
D3Z315	D3Z315_MOUSE	Cope	Coatomer subunit epsilon (Fragment)		0.531546	0.272176	7	7	7	44.5	44.5	44.5	25.37	0	111.17	35061000	38	20.8824	20.3002	20.7467	21.1355	20.5602	20.5485	20.0328	20.4616
O89086	RBM3_MOUSE	Rbm3	RNA-binding protein 3		0	NaN	3	3	3	23.5	23.5	23.5	16.604	0	7.5632	1607000	6	NaN	NaN	NaN	17.6627	18.0428	NaN	NaN	NaN
O89110	CASP8_MOUSE	Casp8	Caspase-8		0	NaN	2	2	2	4.2	4.2	4.2	55.356	0	4.4729	803410	2	NaN	NaN	NaN	NaN	NaN	NaN	NaN	NaN
A0A286YDF2	A0A286YDF2_MOUSE	Vti1a	Vesicle transport through interaction with t-SNAREs homolog 1A		0	NaN	2	2	2	11.7	11.7	11.7	23.039	0	35.64	3465100	9	NaN	NaN	NaN	NaN	NaN	NaN	NaN	NaN
P00158	CYB_MOUSE	Mt-Cyb	Cytochrome b		0	NaN	1	1	1	2.4	2.4	2.4	43.209	0	3.49	10699000	9	NaN	NaN	NaN	NaN	NaN	NaN	NaN	NaN
P00405	COX2_MOUSE	Mtco2	Cytochrome c oxidase subunit 2		0.847021	0.657956	7	7	7	44.9	44.9	44.9	25.976	0	62.856	2078300000	249	27.1416	27.4494	27.9061	28.1033	27.7819	26.4298	26.9007	26.6078
P00848	ATP6_MOUSE	Mtatp6	ATP synthase subunit a		0	NaN	2	2	2	20.8	20.8	20.8	25.095	0	4.1958	4460500	4	NaN	NaN	NaN	NaN	NaN	NaN	NaN	NaN
P00920	CAH2_MOUSE	Ca2	Carbonic anhydrase 2		0.640154	-0.750496	10	10	10	55.8	55.8	55.8	29.032	0	29.131	45952000	47	21.3312	20.0378	21.1367	NaN	19.5014	20.371	21.6278	21.027
P01027	CO3_MOUSE	C3	Complement C3		0.855703	-0.179195	40	40	37	28.6	28.6	26.7	186.48	0	120.66	139530000	210	21.4587	21.3711	21.4823	21.5898	21.5552	21.8924	21.562	21.755
P01029	CO4B_MOUSE	C4b	Complement C4-B		0.741956	1.17133	14	14	14	10	10	10	192.91	0	66.834	23930000	38	21.05	21.0667	19.5858	19.059	22.5029	20.6031	19.0919	19.7125
P01592	IGJ_MOUSE	Jchain	Immunoglobulin J chain		0	NaN	2	2	2	17	17	17	18.013	0	4.2495	15408000	16	NaN	NaN	NaN	NaN	NaN	20.8515	21.3065	NaN
P01635	KV5A3_MOUSE	1 SV=1	Ig kappa chain V-V region K2 (Fragment)		0	NaN	2	2	1	20	20	11.3	12.581	0	7.5532	1780800	2	NaN	NaN	NaN	NaN	NaN	NaN	NaN	NaN
P03977	KV3A4_MOUSE	1 SV=1	Ig kappa chain V-III region 50S10.1		0	NaN	2	1	1	30.6	14.4	14.4	12.042	0	3.282	402970	1	NaN	NaN	NaN	NaN	NaN	NaN	NaN	NaN
P01660	KV3A8_MOUSE	1 SV=1	Ig kappa chain V-III region PC 3741/TEPC 111		0	NaN	2	1	1	26.1	9.9	9.9	12.099	0	3.0757	721860	1	NaN	NaN	NaN	NaN	NaN	NaN	NaN	NaN
P01671	KV3AJ_MOUSE	1 SV=1	Ig kappa chain V-III region PC 7175		0	NaN	4	4	3	68.5	68.5	52.3	12.01	0	46.304	7480700	4	NaN	NaN	NaN	NaN	NaN	NaN	NaN	NaN
A0A1L1SUX8	A0A1L1SUX8_MOUSE	Thy1	Thy-1 antigen (Fragment)		0.181847	0.108074	5	5	5	42.4	42.4	42.4	14.038	0	42.353	59778000	49	21.7647	22.1914	21.4863	22.01	22.2308	21.9232	22.4872	21.868
P01837	IGKC_MOUSE	Igkc	Immunoglobulin kappa constant		0.649386	-0.393839	6	6	6	81.3	81.3	81.3	11.934	0	58.831	111610000	63	22.4308	22.3622	22.4084	22.304	21.4703	22.7031	22.9394	22.0917
P01843	LAC1_MOUSE	1 SV=1	Ig lambda-1 chain C region		0	NaN	2	2	2	32.4	32.4	32.4	11.575	0	4.8216	841730	4	NaN	NaN	NaN	NaN	NaN	NaN	NaN	NaN
P01845	LAC3_MOUSE	Iglc3	Ig lambda-3 chain C region		0	NaN	2	2	2	33.7	33.7	33.7	11.371	0	6.0243	1785700	2	NaN	NaN	NaN	NaN	NaN	NaN	NaN	NaN
P01872	IGHM_MOUSE	Ighm	Immunoglobulin heavy constant mu		0.814511	0.862772	13	13	13	34.6	34.6	34.6	49.971	0	60.905	113870000	69	23.0251	22.6212	21.0151	23.0651	21.2942	22.5219	21.312	21.7056
P01887	B2MG_MOUSE	B2m	Beta-2-microglobulin		0.118968	-0.0727358	4	4	4	47.1	47.1	47.1	13.779	0	8.8967	91929000	45	22.9632	22.5086	22.4697	22.9927	22.2866	22.602	22.8263	23.1441
P01899	HA11_MOUSE	H2-D1	H-2 class I histocompatibility antigen, D-B alpha chain		0.521244	0.193359	17	17	10	45	45	28.2	40.836	0	53.128	229840000	156	22.7328	22.7365	22.869	23.1396	22.8717	22.2698	22.8726	22.6958
Q3TH01	Q3TH01_MOUSE	H2-K1	H-2 class I histocompatibility antigen, K-K alpha chain		0.0784812	-0.0226493	16	13	10	52.8	46.4	36.4	40.285	0	93.443	179350000	118	23.6802	23.4619	23.7089	23.6758	23.7659	23.6201	23.8667	23.4788
E0CZ27	E0CZ27_MOUSE	H3f3a	Histone H3 (Fragment)		0	NaN	3	3	3	15.1	15.1	15.1	13.322	0	4.8376	73289000	23	NaN	NaN	NaN	NaN	NaN	22.3618	22.3963	22.1787
A0A1B0GRC0	A0A1B0GRC0_MOUSE	Col4a1	Collagen alpha-1(IV) chain (Fragment)		0	NaN	2	2	2	9.5	9.5	9.5	33.938	0	2.6616	1626900	5	NaN	NaN	NaN	NaN	NaN	NaN	NaN	NaN
P02468	LAMC1_MOUSE	Lamc1	Laminin subunit gamma-1		0	NaN	2	2	2	1.4	1.4	1.4	177.3	0	7.2833	2207700	7	NaN	NaN	NaN	NaN	NaN	NaN	NaN	NaN
P02469	LAMB1_MOUSE	Lamb1	Laminin subunit beta-1		1.11684	-1.21934	21	21	21	14.9	14.9	14.9	197.09	0	57.828	46610000	58	20.3023	18.9361	19.6646	18.1726	19.2935	20.9159	19.8961	21.1052
A0A0G2JDP4	A0A0G2JDP4_MOUSE	Csn1s2b	Alpha-S2-casein-like B		1.4464	0.589746	11	11	11	67.4	67.4	67.4	15.593	0	140.66	2027400000	2140	26.8105	27.0378	26.4336	27.4293	26.6098	26.3185	26.7019	26.0745
P02798	MT2_MOUSE	Mt2	Metallothionein-2		0.565556	0.617865	3	3	1	34.4	34.4	13.1	6.1153	0	10.835	22426000	79	NaN	21.1158	NaN	19.8074	21.1788	20.0249	20.4351	19.7884
P02802	MT1_MOUSE	Mt1	Metallothionein-1		0.58607	-0.395048	3	3	2	34.4	34.4	21.3	6.0181	0	13.733	65028000	142	21.2275	20.745	20.9478	21.5106	21.5184	22.0699	21.5501	22.0139
P03888	NU1M_MOUSE	Mtnd1	NADH-ubiquinone oxidoreductase chain 1		0.266607	0.132651	2	2	2	8.8	8.8	8.8	36.059	0	6.1111	31779000	18	22.9512	22.235	22.5758	22.4162	NaN	22.3623	22.2057	22.4621
P03899	NU3M_MOUSE	Mtnd3	NADH-ubiquinone oxidoreductase chain 3		0	NaN	1	1	1	13	13	13	13.219	0	14.039	6737200	10	NaN	NaN	NaN	NaN	NaN	NaN	NaN	NaN
P03911	NU4M_MOUSE	Mtnd4	NADH-ubiquinone oxidoreductase chain 4		0.229506	0.292927	5	5	5	13.3	13.3	13.3	51.881	0	7.3448	39598000	87	20.9768	22.1546	22.09	22.7316	21.2206	21.781	20.6443	21.3966
P03921	NU5M_MOUSE	Mtnd5	NADH-ubiquinone oxidoreductase chain 5		0.00795581	-0.00547886	3	3	3	7.7	7.7	7.7	68.474	0	7.1446	288650000	26	26.0744	25.6102	25.9352	26.0522	25.7989	25.6507	25.5299	26.442
P03930	ATP8_MOUSE	Mtatp8	ATP synthase protein 8		0.21811	-0.0998297	3	3	3	46.3	46.3	46.3	7.7662	0	6.9195	816530000	80	NaN	26.5373	NaN	26.5396	NaN	26.4439	26.5748	26.8961
P03953	CFAD_MOUSE	Cfd	Complement factor D		0	NaN	2	2	2	11.6	11.6	11.6	28.057	0	3.7359	10392000	7	NaN	NaN	NaN	NaN	NaN	21.0417	20.5148	20.5876
P03975	IGEB_MOUSE	Iap	IgE-binding protein		0	NaN	3	3	3	6.1	6.1	6.1	62.747	0	5.5609	10546000	19	NaN	NaN	NaN	NaN	NaN	NaN	NaN	NaN
A0A075B5P5	A0A075B5P5_MOUSE	Ighg3	Immunoglobulin heavy constant gamma 3 (Fragment)		0	2.8171	5	5	5	18.5	18.5	18.5	36.198	0	10.532	6797500	7	NaN	22.2114	19.3943	NaN	NaN	NaN	NaN	NaN
P04117	FABP4_MOUSE	Fabp4	Fatty acid-binding protein, adipocyte		0.0344195	-0.0143266	16	16	16	85.6	85.6	85.6	14.65	0	137.32	1030800000	352	24.3274	24.2878	24.5299	24.2413	24.1187	24.3354	23.8807	24.2864
B8JJM3	B8JJM3_MOUSE	Cfb	Complement factor B (Fragment)		0	NaN	1	1	1	7.7	7.7	7.7	25.962	0.0040711	1.916	422650	1	NaN	NaN	NaN	NaN	NaN	NaN	NaN	NaN
A0A498WGS3	A0A498WGS3_MOUSE	Mbp	Myelin basic protein		0	-0.443923	4	4	4	30.7	30.7	30.7	16.537	0	11.922	15631000	21	NaN	NaN	20.8245	NaN	20.5345	20.8531	21.2576	NaN
P04441	HG2A_MOUSE	Cd74	H-2 class II histocompatibility antigen gamma chain		0	-0.0176926	3	3	3	11.1	11.1	11.1	31.557	0	18.458	13034000	12	20.8633	NaN	20.909	NaN	NaN	NaN	20.8529	NaN
P04919	B3AT_MOUSE	Slc4a1	Band 3 anion transport protein		0.73847	-0.496674	9	9	9	10.7	10.7	10.7	103.13	0	28.042	42052000	35	20.8801	21.1765	20.9159	20.4739	NaN	21.2435	21.2068	21.9943
P05063	ALDOC_MOUSE	Aldoc	Fructose-bisphosphate aldolase C		0.41972	-0.141519	29	29	23	78.8	78.8	65	39.394	0	209.98	579070000	320	23.2594	23.3258	23.1166	22.9947	22.951	23.1354	23.2291	23.6158
P05064	ALDOA_MOUSE	Aldoa	Fructose-bisphosphate aldolase A		1.00821	0.241072	26	20	20	78.3	64.6	64.6	39.355	0	123.15	334110000	282	22.7528	23.0581	22.883	23.0409	22.8908	22.4122	22.7638	22.7192
P05132	KAPCA_MOUSE	Prkaca	cAMP-dependent protein kinase catalytic subunit alpha		0	NaN	5	5	5	17.7	17.7	17.7	40.57	0	9.2812	7916100	13	NaN	NaN	NaN	NaN	NaN	20.7201	19.4094	NaN
P05201	AATC_MOUSE	Got1	Aspartate aminotransferase, cytoplasmic		0.652648	-0.326139	17	17	17	50.4	50.4	50.4	46.247	0	65.216	125040000	94	22.3394	21.7411	22.1444	21.6333	22.1894	22.4181	21.9354	22.7099
P05202	AATM_MOUSE	Got2	Aspartate aminotransferase, mitochondrial		0.0822914	0.0344615	23	23	23	57.9	57.9	57.9	47.411	0	157.96	649240000	297	24.6514	24.6232	24.486	24.3048	25.0092	24.6352	24.7088	24.6206
P05213	TBA1B_MOUSE	Tuba1b	Tubulin alpha-1B chain		0.00312039	0.000924587	29	6	0	68.5	17.5	0	50.151	0	107.41	339820000	110	23.5956	23.5516	23.5075	23.4648	23.8278	23.6176	23.5322	23.7788
P05366	SAA1_MOUSE	Saa1	Serum amyloid A-1 protein		0	NaN	5	5	4	32.8	32.8	24.6	13.77	0	14.45	26827000	28	NaN	22.2452	NaN	22.4503	22.1553	NaN	NaN	NaN
A0A1B0GQV5	A0A1B0GQV5_MOUSE	Saa2	Serum amyloid A protein		0	NaN	3	2	2	36.4	25	25	10.074	0	5.2206	6186300	11	NaN	NaN	NaN	NaN	NaN	NaN	NaN	NaN
F8WI90	F8WI90_MOUSE	Src	Tyrosine-protein kinase		0	NaN	6	6	4	12.5	12.5	9.3	59.89	0	20.991	6621800	9	NaN	NaN	NaN	NaN	NaN	NaN	NaN	NaN
E9PWG4	E9PWG4_MOUSE	Myl1	Myosin light chain 1/3, skeletal muscle isoform		0	NaN	4	4	4	24.2	24.2	24.2	17.689	0	15.396	9845800	13	NaN	NaN	NaN	NaN	NaN	NaN	NaN	NaN
P06151	LDHA_MOUSE	Ldha	L-lactate dehydrogenase A chain		0.733907	-0.224031	24	24	23	59.3	59.3	59.3	36.498	0	140.82	1426100000	397	25.6826	25.333	25.3995	25.2331	25.5161	25.5854	25.917	25.759
P06728	APOA4_MOUSE	Apoa4	Apolipoprotein A-IV		0.717331	-0.208281	18	18	18	59.2	59.2	59.2	45.029	0	130.2	176270000	115	21.9725	21.5839	22.1129	22.1985	21.7776	22.0729	21.9641	22.2158
P06745	G6PI_MOUSE	Gpi	Glucose-6-phosphate isomerase		1.11182	-0.577346	12	12	12	27.8	27.8	27.8	62.766	0	104.46	83753000	92	21.882	21.8748	21.6994	21.1209	21.0315	22.0497	22.0871	22.3825
P06796	CASK_MOUSE	Csn3	Kappa-casein		1.53748	0.844739	4	4	4	27.6	27.6	27.6	20.03	0	15.86	2879800000	175	27.5165	28.4594	27.5831	28.5042	27.6393	27.03	27.1454	26.9819
P06797	CATL1_MOUSE	Ctsl	Procathepsin L		0.606313	1.23036	6	6	6	23.1	23.1	23.1	37.547	0	32.335	25847000	25	19.7359	20.9374	19.4907	22.7594	NaN	20.2991	NaN	19.9518
S4R1M0	S4R1M0_MOUSE	Ptprc	Protein-tyrosine-phosphatase		0	0.031105	6	6	6	5.9	5.9	5.9	128.57	0	35.304	6795700	16	19.7108	NaN	NaN	NaN	NaN	NaN	20.1441	19.2153
P06801	MAOX_MOUSE	Me1	NADP-dependent malic enzyme		1.37153	-0.405681	37	37	37	68.7	68.7	68.7	63.953	0	323.31	1567800000	712	25.0698	24.8883	25.0098	24.4698	24.6221	25.1306	25.1276	25.4047
A0A0A6YWP4	A0A0A6YWP4_MOUSE	Cfh	Complement factor H (Fragment)		0	NaN	2	2	1	4.1	4.1	1.9	94.106	0.0089993	1.6229	21957000	11	NaN	NaN	NaN	NaN	NaN	NaN	NaN	NaN
Q5NCU4	Q5NCU4_MOUSE	Sparc	Osteonectin		0	NaN	1	1	1	3.3	3.3	3.3	34.322	0	3.22	104620	1	NaN	NaN	NaN	NaN	NaN	NaN	NaN	NaN
P07309	TTHY_MOUSE	Ttr	Transthyretin		1.13869	-0.847936	9	9	9	51	51	51	15.776	0	39.392	121900000	55	21.452	NaN	22.691	22.1692	21.8058	23.275	21.9152	22.7467
P07310	KCRM_MOUSE	Ckm	Creatine kinase M-type		1.00333	1.25909	9	9	9	32.3	32.3	32.3	43.044	0	78.927	31178000	29	21.1861	22.0247	19.3302	21.291	21.0725	NaN	20.9387	NaN
P07356	ANXA2_MOUSE	Anxa2	Annexin A2		0.429117	-0.164217	36	36	36	80.8	80.8	80.8	38.676	0	323.31	1918400000	684	25.2203	25.4034	25.8147	25.2156	25.6946	25.2488	25.6963	25.431
P07724	ALBU_MOUSE	Alb	Albumin		1.5812	0.110814	62	62	58	86.5	86.5	84.4	68.692	0	323.31	12476000000	4110	26.857	26.8507	26.7012	26.8729	26.8112	26.8433	26.6967	26.7073
P07901	HS90A_MOUSE	Hsp90aa1	Heat shock protein HSP 90-alpha		0.556085	-0.100592	29	14	14	39	23.2	23.2	84.787	0	75.667	125920000	113	21.8374	21.9985	21.9385	22.0681	22.0036	21.99	22.1473	22.2341
P08003	PDIA4_MOUSE	Pdia4	Protein disulfide-isomerase A4		0.814525	-0.115493	44	44	44	57.2	57.2	57.2	71.982	0	323.31	1126100000	702	23.9145	24.1158	24.1799	24.1249	24.2002	24.3063	24.1423	24.189
P08032	SPTA1_MOUSE	Spta1	Spectrin alpha chain, erythrocytic 1		0	NaN	5	4	4	2.4	2	2	279.86	0	10.849	2098600	5	NaN	NaN	NaN	NaN	NaN	18.2999	NaN	18.5969
P08071	TRFL_MOUSE	Ltf	Lactotransferrin		0.957631	0.716323	51	51	51	70.9	70.9	70.9	77.837	0	323.31	1239400000	824	24.1219	25.3041	24.5693	25.4871	25.1053	23.9705	24.7878	23.8255
P08074	CBR2_MOUSE	Cbr2	Carbonyl reductase [NADPH] 2		0.141301	0.0729876	3	3	3	11.5	11.5	11.5	25.958	0	7.8856	16941000	23	20.5947	20.9888	20.3932	NaN	20.2697	20.6486	20.4492	20.688
A0A0B4J1G1	A0A0B4J1G1_MOUSE	Fcgr2b	Fc receptor, IgG, low affinity IIb		0	NaN	2	2	2	8.9	8.9	8.9	32.976	0.0015032	2.0676	1068200	2	NaN	NaN	NaN	NaN	NaN	NaN	NaN	NaN
P08113	ENPL_MOUSE	Hsp90b1	Endoplasmin		0.814489	0.0743418	69	69	67	64.2	64.2	62.7	92.475	0	323.31	8328800000	2189	27.2255	27.0748	27.1157	27.1298	27.1946	27.0393	27.1504	27.022
P08122	CO4A2_MOUSE	Col4a2	Collagen alpha-2(IV) chain		0	NaN	2	2	2	1.4	1.4	1.4	167.32	0	5.666	2602800	6	NaN	NaN	NaN	NaN	NaN	NaN	NaN	NaN
P08207	S10AA_MOUSE	S100a10	Protein S100-A10		0.0062794	-0.0053978	4	4	4	49.5	49.5	49.5	11.186	0	20.65	160830000	107	23.2788	22.5939	23.1118	22.7473	23.6249	22.7759	23.5019	22.8768
P08226	APOE_MOUSE	Apoe	Apolipoprotein E		0.910925	0.638078	12	12	12	33.8	33.8	33.8	35.866	0	35.526	65200000	115	21.6076	22.7379	22.1335	22.2647	22.9768	22.0301	21.4285	21.4427
P08228	SODC_MOUSE	Sod1	Superoxide dismutase [Cu-Zn]		0.70234	-0.287171	10	10	10	61	61	61	15.942	0	59.803	449600000	156	23.8592	23.9972	24.1243	23.6842	23.1316	23.9236	23.8581	23.9148
P08249	MDHM_MOUSE	Mdh2	Malate dehydrogenase, mitochondrial		0.563645	0.20971	20	20	20	63.6	63.6	63.6	35.611	0	190.42	2077600000	636	26.4008	26.1476	26.0755	25.933	26.7327	26.0505	26.0839	26.1653
D3YZ35	D3YZ35_MOUSE	Nefm	Neurofilament medium polypeptide		0	NaN	3	1	1	4.7	2.1	2.1	53.497	0.0011385	2.246	146540	1	NaN	NaN	NaN	NaN	NaN	NaN	NaN	NaN
P08752	GNAI2_MOUSE	Gnai2	Guanine nucleotide-binding protein G(i) subunit alpha-2		1.07153	0.213029	24	24	12	63.7	63.7	36.1	40.489	0	112.76	322160000	192	23.8598	23.7927	23.852	23.7995	23.8788	23.4991	23.7184	23.4092
P09055	ITB1_MOUSE	Itgb1	Integrin beta-1		1.01302	0.203108	25	25	25	35.6	35.6	35.6	88.231	0	130.73	304050000	308	23.6859	23.8191	23.8483	23.8033	23.8168	23.4228	23.599	23.4425
P09103	PDIA1_MOUSE	P4hb	Protein disulfide-isomerase		1.56162	-0.361574	68	68	68	91.9	91.9	91.9	57.058	0	323.31	17792000000	3509	27.0145	27.0366	27.0994	26.8368	27.1425	27.5805	27.4971	27.2996
P09242	PPBT_MOUSE	Alpl	Alkaline phosphatase, tissue-nonspecific isozyme		1.0335	-0.52072	8	8	8	17	17	17	57.514	0	27.516	40287000	28	NaN	NaN	NaN	20.7152	21.285	21.5538	21.4962	21.5125
P09405	NUCL_MOUSE	Ncl	Nucleolin		0.157577	-0.095644	11	11	11	17.5	17.5	17.5	76.722	0	48.629	15049000	29	19.6927	NaN	19.3575	19.1303	NaN	19.7608	19.342	19.5682
P09411	PGK1_MOUSE	Pgk1	Phosphoglycerate kinase 1		0.109911	-0.040235	19	19	19	57.6	57.6	57.6	44.55	0	210.98	470960000	228	23.3647	23.5369	23.4886	23.0951	23.7182	23.3958	23.5273	23.464
P09470	ACE_MOUSE	Ace	Angiotensin-converting enzyme		1.35975	0.84132	19	19	19	19.2	19.2	19.2	150.92	0	88.005	91657000	84	21.9306	22.6349	21.598	22.5296	22.5654	21.0987	22.375	21.2236
P09528	FRIH_MOUSE	Fth1	Ferritin heavy chain		0.565327	0.530201	10	10	10	56.6	56.6	56.6	21.066	0	25.075	109250000	81	21.0839	22.366	22.032	22.6087	23.0757	21.6244	21.5723	21.7847
P09671	SODM_MOUSE	Sod2	Superoxide dismutase [Mn], mitochondrial		0.0055342	0.00345564	9	9	9	38.3	38.3	38.3	24.603	0	40.48	240960000	110	23.4095	22.9991	22.8142	23.1582	23.5759	23.3281	23.5813	23.4052
A0A0R4IZW5	A0A0R4IZW5_MOUSE	Cdh1	Cadherin-1		0.0468188	0.012877	18	18	18	28.6	28.6	28.6	98.283	0	72.965	90973000	72	22.3769	22.2865	22.4116	22.5105	22.4555	22.3626	22.603	22.2007
P09813	APOA2_MOUSE	Apoa2	Apolipoprotein A-II		0	-0.466037	2	2	2	18.6	18.6	18.6	11.309	0	7.2957	39887000	19	21.4312	NaN	NaN	NaN	NaN	21.6926	22.2147	21.7846
A0A0A6YVR9	A0A0A6YVR9_MOUSE	Surf1	SURF1-like protein (Fragment)		0.0052328	0.00379403	6	6	6	42.5	42.5	42.5	27.146	0	20.689	30431000	20	NaN	21.3991	21.1179	21.9545	21.3728	21.7793	21.7121	21.6774
P0C0A3	CHMP6_MOUSE	Chmp6	Charged multivesicular body protein 6		0	-0.756828	2	2	2	10.5	10.5	10.5	23.415	0	12.472	5484300	8	19.0576	NaN	NaN	NaN	NaN	NaN	19.8144	NaN
Q3THW5	H2AV_MOUSE	H2az2	Histone H2A.V		0	NaN	3	1	1	20.3	7.8	7.8	13.509	0	3.1861	283210	3	NaN	NaN	NaN	NaN	NaN	NaN	NaN	NaN
S4R191	S4R191_MOUSE	Smim1	Small integral membrane protein 1 (Fragment)		0	NaN	1	1	1	50	50	50	2.7899	0	4.8917	1276900	2	NaN	NaN	NaN	NaN	NaN	NaN	NaN	NaN
A0A140LIS7	A0A140LIS7_MOUSE	Pet100	Protein PET100 homolog, mitochondrial		0	NaN	1	1	1	19.4	19.4	19.4	8.3494	0	5.8741	3160000	6	NaN	NaN	NaN	NaN	NaN	NaN	NaN	NaN
P0DN34	NDUB1_MOUSE	Ndufb1	NADH dehydrogenase [ubiquinone] 1 beta subcomplex subunit 1		0.725454	-0.498106	2	2	2	31.6	31.6	31.6	6.954	0	4.2064	78505000	27	22.6052	21.6346	22.1599	22.6095	21.5594	22.7366	22.937	22.5676
P0DP28	CALM3_MOUSE	Calm3	Calmodulin-3		0.689154	-0.149241	12	12	12	41.6	41.6	41.6	16.837	0	89.516	396240000	164	23.4605	23.4404	23.6663	23.5087	23.2551	23.316	23.5637	23.7155
P10107	ANXA1_MOUSE	Anxa1	Annexin A1		0.49993	0.257578	29	29	29	72.5	72.5	72.5	38.734	0	237.51	292120000	238	21.8948	22.8541	22.2107	22.575	22.3113	22.1154	22.4237	21.8551
P10126	EF1A1_MOUSE	Eef1a1	Elongation factor 1-alpha 1		0.786015	-0.14203	25	25	25	68.8	68.8	68.8	50.113	0	123.72	2657400000	927	26.5208	26.3505	26.3305	26.3647	26.4204	26.6302	26.7038	26.5599
P10404	ENV1_MOUSE	1 SV=3	MLV-related proviral Env polyprotein		1.61796	0.680456	18	18	16	28.2	28.2	27	69.612	0	89.62	542400000	175	24.6687	24.2868	23.609	24.4618	24.7598	23.9775	24.3792	23.4896
P10518	HEM2_MOUSE	Alad	Delta-aminolevulinic acid dehydratase		0	NaN	1	1	1	5.8	5.8	5.8	36.023	0	80.067	1120600	7	NaN	NaN	NaN	NaN	NaN	NaN	NaN	NaN
P10598	CASB_MOUSE	Csn2	Beta-casein		1.09171	0.663309	6	6	1	29	29	11.3	25.337	0	106.74	2924000000	820	27.2477	28.2622	26.9058	27.929	27.1265	27.2886	27.1622	26.5557
P10605	CATB_MOUSE	Ctsb	Cathepsin B		0.0795506	0.0325632	19	19	19	52.8	52.8	52.8	37.279	0	178.46	513450000	288	24.4673	24.151	24.6821	24.3247	24.6192	24.2739	24.2526	24.2235
P10639	THIO_MOUSE	Txn	Thioredoxin		2.00637	-0.648983	10	10	10	65.7	65.7	65.7	11.675	0	82.346	160290000	122	22.41	21.7717	22.4869	21.8014	21.9545	22.5498	22.9059	22.5909
A2AE89	A2AE89_MOUSE	Gstm1	Glutathione transferase		0	0.0567961	5	5	5	22.5	22.5	22.5	28.556	0	12.319	38711000	30	21.9516	NaN	22.0024	NaN	NaN	21.7238	22.0076	21.8453
P10810	CD14_MOUSE	Cd14	Monocyte differentiation antigen CD14		1.35112	1.08142	12	12	12	34.7	34.7	34.7	39.203	0	171.38	196050000	127	23.0295	24.0343	23.143	24.3756	23.9409	22.279	23.4539	22.1788
P10833	RRAS_MOUSE	Rras	Ras-related protein R-Ras		0.379804	0.244876	10	10	8	53.7	53.7	41.3	23.764	0	31.8	63268000	73	21.7086	21.4073	22.2258	21.8662	21.8586	21.153	21.1122	21.3701
P10852	4F2_MOUSE	Slc3a2	4F2 cell-surface antigen heavy chain		1.26298	-0.2838	33	33	33	54	54	54	58.336	0	178.18	1616900000	661	25.0426	24.932	25.0587	24.8512	24.5327	25.0393	25.2417	25.154
Q8CGP2	H2B1P_MOUSE	Hist1h2bp	Histone H2B type 1-P		0.619074	-0.575448	9	9	9	55.6	55.6	55.6	13.992	0	35.09	198190000	126	22.0462	22.8218	21.9111	22.1277	22.8399	23.6668	23.3127	23.2468
P10923	OSTP_MOUSE	Spp1	Osteopontin		0	NaN	1	1	1	6.5	6.5	6.5	32.459	0	97.987	1042000	2	NaN	NaN	NaN	NaN	NaN	NaN	NaN	NaN
P11087	CO1A1_MOUSE	Col1a1	Collagen alpha-1(I) chain		1.21515	0.714294	6	6	6	4.5	4.5	4.5	138.03	0	17.155	98666000	60	22.7614	23.2475	21.9346	22.7585	22.6166	21.6452	22.9304	22.0166
P11152	LIPL_MOUSE	Lpl	Lipoprotein lipase		0.338923	-0.337083	12	12	12	32.5	32.5	32.5	53.109	0	31.324	57938000	67	21.4056	21.7567	21.4593	20.7937	19.9611	21.5477	21.4203	20.838
P11247	PERM_MOUSE	Mpo	Myeloperoxidase		0.263367	0.567488	7	7	7	11.1	11.1	11.1	81.181	0	20.356	17989000	29	NaN	21.5763	19.3748	20.1989	NaN	21.1233	20.4622	NaN
B7ZNJ1	B7ZNJ1_MOUSE	Fn1	Fibronectin		0.611967	0.261667	33	33	33	21	21	21	239.72	0	137.67	100420000	105	21.7055	22.232	21.7455	22.1863	21.9288	22.152	21.7485	21.36
P11352	GPX1_MOUSE	Gpx1	Glutathione peroxidase 1		0.788547	-0.339284	11	11	11	70.1	70.1	70.1	22.329	0	38.396	103450000	49	22.842	22.3211	22.4982	22.2123	22.6844	22.8177	23.2451	22.856
P11404	FABPH_MOUSE	Fabp3	Fatty acid-binding protein, heart		0.4055	-0.162198	15	15	15	78.9	78.9	78.9	14.819	0	73.958	6834700000	942	27.9538	27.7213	27.6808	27.3867	27.8755	28.2053	27.7127	27.9874
P11438	LAMP1_MOUSE	Lamp1	Lysosome-associated membrane glycoprotein 1		0.476103	0.661002	3	3	3	8.4	8.4	8.4	43.865	0	10.496	72895000	50	NaN	23.0106	22.7305	NaN	22.7564	NaN	21.7144	NaN
D3Z2T9	D3Z2T9_MOUSE	Cdk1	Cyclin-dependent kinase 1 (Fragment)		0	0.55077	2	2	1	8.5	8.5	4.5	22.893	0.0093324	1.6063	542610000	38	NaN	26.0526	25.4766	NaN	NaN	NaN	25.5271	NaN
P11499	HS90B_MOUSE	Hsp90ab1	Heat shock protein HSP 90-beta		0.417526	-0.063767	42	40	25	50.3	50.3	38.5	83.28	0	228.51	999060000	436	23.8411	23.8175	23.9152	23.9565	23.6886	23.9652	23.7789	23.8995
P11672	NGAL_MOUSE	Lcn2	Neutrophil gelatinase-associated lipocalin		1.0883	1.16776	5	5	5	22	22	22	22.875	0	14.942	35121000	42	22.4168	21.9702	22.1349	23.5458	22.1153	NaN	20.9042	20.9938
P11688	ITA5_MOUSE	Itga5	Integrin alpha-5		0	NaN	3	3	3	3.3	3.3	3.3	115.04	0	4.1109	1638300	6	NaN	NaN	NaN	NaN	NaN	NaN	NaN	NaN
Q542I8	Q542I8_MOUSE	Itgb2	Integrin beta		0.0214008	0.0459741	12	12	12	20.6	20.6	20.6	84.893	0	96.855	33836000	41	19.6139	21.0627	19.7505	20.1912	NaN	20.9447	21.2985	18.9795
P11881	ITPR1_MOUSE	Itpr1	Inositol 1,4,5-trisphosphate receptor type 1		2.28381	-1.74551	22	18	12	9.2	7.9	5.9	313.16	0	42.169	26960000	56	18.9789	17.9302	19.9009	18.4234	19.1801	19.8937	21.1059	20.5941
P11983	TCPA_MOUSE	Tcp1	T-complex protein 1 subunit alpha		0.893033	-0.207005	23	23	23	42.1	42.1	42.1	60.448	0	58.874	110790000	120	21.7903	21.6088	21.6988	21.3515	21.4482	21.6078	21.8005	21.9198
A0A2I3BR03	A0A2I3BR03_MOUSE	App	ABPP		0	NaN	1	1	1	2.1	2.1	2.1	65.965	0	4.9812	1988300	4	NaN	NaN	NaN	NaN	NaN	NaN	NaN	NaN
P12242	UCP1_MOUSE	Ucp1	Mitochondrial brown fat uncoupling protein 1		0.202519	-0.375279	7	7	7	27.7	27.7	27.7	33.247	0	35.636	38683000	39	21.0307	22.3011	22.5204	21.2081	NaN	NaN	21.2567	NaN
P12265	BGLR_MOUSE	Gusb	Beta-glucuronidase		0	NaN	2	2	2	2.8	2.8	2.8	74.194	0	3.6899	2209900	9	NaN	NaN	NaN	NaN	NaN	NaN	NaN	NaN
P12382	PFKAL_MOUSE	Pfkl	ATP-dependent 6-phosphofructokinase, liver type		1.13534	-0.85386	25	25	25	34.1	34.1	34.1	85.359	0	155.2	143150000	114	22.3127	21.1957	21.6453	21.6351	20.8524	22.582	22.5561	22.6279
P12787	COX5A_MOUSE	Cox5a	Cytochrome c oxidase subunit 5A, mitochondrial		0.803016	-0.445045	11	11	11	63	63	63	16.101	0	77.004	2637800000	431	26.0856	25.6191	25.7429	25.8038	25.779	26.6637	25.9073	26.7537
P12815	PDCD6_MOUSE	Pdcd6	Programmed cell death protein 6		0.416105	0.577825	5	5	5	24.6	24.6	24.6	21.867	0	15.045	23390000	18	21.7587	21.6709	21.0612	NaN	NaN	20.1825	22.1059	21.1982
P12970	RL7A_MOUSE	Rpl7a	60S ribosomal protein L7a		0.203945	0.0400147	29	29	29	65.4	65.4	65.4	29.976	0	295.39	6237900000	1118	26.4386	26.642	26.484	26.6919	26.6464	26.7214	26.5148	26.5386
A0A494BAV5	A0A494BAV5_MOUSE	Scd2	Stearoyl-CoA desaturase 2		0	0.0689154	9	3	3	47.4	29.3	29.3	24.575	0	24.192	41126000	37	NaN	NaN	23.1636	NaN	22.6568	22.0457	22.78	22.3623
P13020	GELS_MOUSE	Gsn	Gelsolin		1.12084	-0.41151	15	15	15	27.6	27.6	27.6	85.941	0	122.86	301820000	101	24.2544	24.405	24.1712	23.8235	23.8403	24.6063	24.4455	24.7461
P13516	ACOD1_MOUSE	Scd1	Acyl-CoA desaturase 1		0.851447	-0.346083	12	12	6	37.5	37.5	26.5	41.046	0	81.103	953840000	580	24.2313	24.5937	24.7906	24.1312	24.519	24.9434	24.2114	24.9139
P13597	ICAM1_MOUSE	Icam1	Intercellular adhesion molecule 1		0	NaN	2	2	2	3.7	3.7	3.7	58.844	0	5.215	777810	2	NaN	NaN	NaN	NaN	NaN	NaN	NaN	NaN
P13707	GPDA_MOUSE	Gpd1	Glycerol-3-phosphate dehydrogenase [NAD(+)], cytoplasmic		1.12801	-0.134408	27	27	25	84	84	80.8	37.572	0	292.21	643350000	322	24.4739	24.6657	24.7721	24.5345	24.6551	24.7362	24.5953	24.7631
P14069	S10A6_MOUSE	S100a6	Protein S100-A6		0.396514	-0.433075	2	2	2	28.1	28.1	28.1	10.051	0	8.1539	89986000	21	NaN	NaN	23.9897	24.0604	23.843	24.7798	NaN	NaN
P14094	AT1B1_MOUSE	Atp1b1	Sodium/potassium-transporting ATPase subunit beta-1		0	NaN	3	3	3	11.5	11.5	11.5	35.194	0	5.192	3874600	7	NaN	NaN	NaN	NaN	NaN	NaN	NaN	NaN
P14115	RL27A_MOUSE	Rpl27a	60S ribosomal protein L27a		1.21517	-0.579858	10	10	10	48	48	48	16.605	0	34.613	1544400000	284	25.8317	25.9634	25.7114	25.8532	25.5552	26.7675	26.6512	26.393
P14131	RS16_MOUSE	Rps16	40S ribosomal protein S16		0.283144	-0.0827799	19	19	19	77.4	77.4	77.4	16.445	0	58.537	3782200000	834	27.1175	26.9127	26.8893	27.1762	27.1918	27.3671	27.2083	27.2646
P14142	GLUT4_MOUSE	Slc2a4	Solute carrier family 2, facilitated glucose transporter member 4		0	NaN	1	1	1	2	2	2	54.755	0.0058694	1.811	1017400	3	NaN	NaN	NaN	NaN	NaN	NaN	NaN	NaN
P14148	RL7_MOUSE	Rpl7	60S ribosomal protein L7		0.80429	-0.171107	30	30	30	60.7	60.7	60.7	31.419	0	101.96	6795900000	1554	27.685	27.8169	27.5861	27.512	27.5397	27.9277	27.9129	27.8113
P14152	MDHC_MOUSE	Mdh1	Malate dehydrogenase, cytoplasmic		1.32904	-0.375302	19	19	19	45.5	45.5	45.5	36.511	0	114.2	927190000	294	25.1497	24.7239	24.9806	24.8372	24.6086	25.1833	25.2102	25.4464
P14206	RSSA_MOUSE	Rpsa	40S ribosomal protein SA		0.0779394	-0.0241461	21	21	21	65.8	65.8	65.8	32.838	0	254.47	5832100000	871	27.6381	27.7265	27.5438	27.7831	27.7367	28.0382	27.7612	27.6379
P14211	CALR_MOUSE	Calr	Calreticulin		1.42365	-0.247949	42	42	42	74.3	74.3	74.3	47.994	0	323.31	5241900000	1695	25.9058	25.5863	25.9399	25.7314	25.9096	26.1793	25.9927	26.0131
G3UWR9	G3UWR9_MOUSE	H2-Aa	H-2 class II histocompatibility antigen, A-Q alpha chain		0	NaN	1	1	1	8.7	8.7	8.7	18.971	0	26.127	4975900	5	NaN	NaN	NaN	NaN	NaN	NaN	NaN	NaN
P14483	HB2A_MOUSE	H2-Ab1	H-2 class II histocompatibility antigen, A beta chain		0.324805	0.168051	9	9	9	39.2	39.2	39.2	30.128	0	46.682	21794000	28	20.0556	20.0192	20.4156	20.363	NaN	19.9857	19.6123	19.8981
P14576	SRP54_MOUSE	Srp54	Signal recognition particle 54 kDa protein		0	NaN	9	9	9	19	19	19	55.72	0	18.475	15384000	17	NaN	NaN	NaN	NaN	NaN	20.5983	19.1429	20.8279
P14602	HSPB1_MOUSE	Hspb1	Heat shock protein beta-1		1.26334	0.909121	8	8	8	45.9	45.9	45.9	23.014	0	14.001	52410000	35	21.877	22.021	21.3903	22.5741	22.2187	20.2656	21.9004	21.498
P14685	PSMD3_MOUSE	Psmd3	26S proteasome non-ATPase regulatory subunit 3		0.466719	-0.221992	8	8	8	20.2	20.2	20.2	60.718	0	29.684	16971000	19	20.1234	NaN	20.4883	NaN	19.977	20.2293	19.9103	20.4609
P14733	LMNB1_MOUSE	Lmnb1	Lamin-B1		0	NaN	4	3	3	9	7.7	7.7	66.785	0	9.0154	1155800	5	NaN	NaN	NaN	NaN	NaN	NaN	NaN	NaN
P14824	ANXA6_MOUSE	Anxa6	Annexin A6		0	NaN	62	1	1	77	4.5	4.5	75.884	0	11.367	542690	3	NaN	NaN	NaN	NaN	NaN	NaN	NaN	NaN
P14869	RLA0_MOUSE	Rplp0	60S acidic ribosomal protein P0		0.920215	0.1766	23	23	23	66.9	66.9	66.9	34.216	0	308.69	4704100000	1050	26.9109	26.7888	26.7609	26.8877	26.849	26.8344	26.4094	26.7253
P14901	HMOX1_MOUSE	Hmox1	Heme oxygenase 1		0	-0.229628	4	4	4	19	19	19	32.928	0	9.1819	15621000	13	NaN	NaN	NaN	NaN	20.7133	NaN	21.4133	20.4726
P15089	CBPA3_MOUSE	Cpa3	Mast cell carboxypeptidase A		0	NaN	1	1	1	3.4	3.4	3.4	48.789	0	3.7605	1425600	1	NaN	NaN	NaN	NaN	NaN	NaN	NaN	NaN
P15105	GLNA_MOUSE	Glul	Glutamine synthetase		0.871502	-0.284478	12	12	12	40.2	40.2	40.2	42.119	0	132.65	179080000	134	23.4885	23.6888	23.5805	23.5001	23.0284	23.5515	23.8132	23.8986
P15208	INSR_MOUSE	Insr	Insulin receptor		0	NaN	4	4	4	3.6	3.6	3.6	155.61	0	26.609	4114500	13	NaN	NaN	18.8889	NaN	NaN	NaN	18.8603	18.3327
P15306	TRBM_MOUSE	Thbd	Thrombomodulin		0	NaN	2	2	2	3.6	3.6	3.6	61.867	0.000387	2.505	956480	4	NaN	NaN	NaN	NaN	NaN	NaN	NaN	NaN
G5E846	G5E846_MOUSE	Prph	Peripherin		0	NaN	8	3	3	14.1	7.8	7.8	54.297	0	4.5889	1532500	5	NaN	NaN	NaN	NaN	NaN	NaN	NaN	NaN
Q3U8S1	Q3U8S1_MOUSE	Cd44	CD44 antigen		0	NaN	1	1	1	3.3	3.3	3.3	40.263	0	5.4888	12366000	9	NaN	NaN	NaN	NaN	NaN	NaN	NaN	NaN
P15532	NDKA_MOUSE	Nme1	Nucleoside diphosphate kinase A		0	NaN	11	3	3	73.7	19.1	19.1	17.208	0	15.677	22971000	32	NaN	NaN	NaN	NaN	NaN	21.362	20.6893	21.5514
P15535	B4GT1_MOUSE	B4galt1	Beta-1,4-galactosyltransferase 1		1.84855	-0.545123	14	14	14	35.1	35.1	35.1	44.411	0	124.51	675430000	250	24.6577	24.4321	25.1362	24.5834	24.9517	25.2459	24.9325	25.4909
P15864	H12_MOUSE	H1-2	Histone H1.2		0	NaN	2	2	1	10.8	10.8	5.7	21.266	0	3.6429	8222200	9	NaN	NaN	NaN	NaN	NaN	NaN	NaN	NaN
P15920	VPP2_MOUSE	Atp6v0a2	V-type proton ATPase 116 kDa subunit a2		0.633092	0.258624	5	5	5	6	6	6	98.144	0	18.918	22464000	29	21.1115	21.1464	21.0714	21.3088	NaN	20.4799	20.9888	21.1811
P16015	CAH3_MOUSE	Ca3	Carbonic anhydrase 3		0.0776006	0.0282402	16	16	16	61.5	61.5	61.5	29.366	0	88.288	615530000	191	23.9076	24.4561	24.2933	24.2109	24.2978	24.1184	24.2961	24.0516
P16045	LEG1_MOUSE	Lgals1	Galectin-1		0.946467	-0.37315	5	5	5	48.1	48.1	48.1	14.866	0	30.209	111880000	55	22.5857	22.7782	22.7929	21.9765	22.0505	22.6738	22.7796	22.6371
P16125	LDHB_MOUSE	Ldhb	L-lactate dehydrogenase B chain		0	0.730494	4	3	3	13.8	10.2	10.2	36.572	0	5.4773	8930500	10	20.2	20.5013	NaN	NaN	NaN	NaN	19.6201	NaN
A2AUM6	A2AUM6_MOUSE	Srp14	Signal recognition particle 14 kDa protein		0	NaN	1	1	1	12.4	12.4	12.4	11.234	0	5.5285	9752500	9	NaN	NaN	NaN	NaN	NaN	NaN	NaN	NaN
P16330	CN37_MOUSE	Cnp	2,3-cyclic-nucleotide 3-phosphodiesterase		0.369239	-0.116808	15	15	15	34	34	34	47.123	0	38.701	63422000	71	20.9969	21.0853	20.7465	20.7117	20.769	21.1176	20.9446	21.2215
P16332	MUTA_MOUSE	Mmut	Methylmalonyl-CoA mutase, mitochondrial		0.376255	0.0470772	11	11	11	20.5	20.5	20.5	82.843	0	35.974	41395000	44	21.005	20.9039	20.9952	21.0405	21.0833	20.9047	20.8903	21.0541
P16460	ASSY_MOUSE	Ass1	Argininosuccinate synthase		0	-0.0649939	5	5	5	13.6	13.6	13.6	46.584	0	9.3253	11454000	10	19.7922	NaN	NaN	NaN	NaN	NaN	19.4123	20.3021
P16546	SPTN1_MOUSE	Sptan1	Spectrin alpha chain, non-erythrocytic 1		2.86613	-0.357707	113	113	112	49	49	48.5	284.59	0	323.31	766590000	655	21.997	22.2409	22.4449	22.0499	22.1045	22.3974	22.5603	22.4205
P16675	PPGB_MOUSE	Ctsa	Lysosomal protective protein		0	-0.0908318	3	3	3	6.8	6.8	6.8	53.844	0	7.5582	18218000	17	20.9211	NaN	21.1487	20.8827	21.3699	NaN	NaN	NaN
P16858	G3P_MOUSE	Gapdh	Glyceraldehyde-3-phosphate dehydrogenase		0.0694791	0.0225425	21	21	3	72.7	72.7	12.6	35.81	0	206.66	2175100000	681	26.2326	26.1214	25.9765	25.9424	26.136	26.3804	25.9687	26.0168
P17047	LAMP2_MOUSE	Lamp2	Lysosome-associated membrane glycoprotein 2		1.12859	0.796509	3	3	3	6.5	6.5	6.5	45.681	0	5.8174	53007000	25	23.021	23.317	NaN	23.6882	23.7324	22.9965	22.2898	NaN
P17182	ENOA_MOUSE	Eno1	Alpha-enolase		1.00378	-0.146554	35	35	35	76.5	76.5	76.5	47.14	0	323.31	2117400000	690	24.6907	24.5392	24.6449	24.4342	24.6807	24.6763	24.8306	24.7793
P17426	AP2A1_MOUSE	Ap2a1	AP-2 complex subunit alpha-1		0	NaN	15	6	6	20	8.3	8.3	107.66	0	11.115	4108200	9	NaN	NaN	NaN	NaN	NaN	NaN	NaN	NaN
P17427	AP2A2_MOUSE	Ap2a2	AP-2 complex subunit alpha-2		1.07231	-0.204798	36	36	27	43.7	43.7	32.5	104.02	0	142.6	256130000	191	23.3688	23.3799	23.3834	23.0732	23.3839	23.6174	23.6149	23.4094
P17439	GLCM_MOUSE	Gba	Lysosomal acid glucosylceramidase		0	0.456255	6	6	6	13.8	13.8	13.8	57.621	0	21.859	22002000	22	NaN	NaN	20.5656	NaN	21.1224	20.7164	21.0609	20.3218
P17563	SBP1_MOUSE	Selenbp1	Methanethiol oxidase		0	NaN	3	3	3	8.1	8.1	8.1	52.513	0	8.2193	3928900	7	NaN	NaN	NaN	NaN	NaN	19.2056	19.1334	18.7266
P17665	COX7C_MOUSE	Cox7c	Cytochrome c oxidase subunit 7C, mitochondrial		0.155518	-0.23542	3	3	3	31.7	31.7	31.7	7.3325	0	6.9214	235350000	95	24.0863	23.8879	24.4357	22.3748	24.0848	23.1381	24.6524	23.1492
G3UVV4	G3UVV4_MOUSE	Hk1	Hexokinase		0.302588	-0.130772	14	14	12	17.1	17.1	14.6	101.87	0	29.636	20008000	34	19.772	NaN	19.9378	19.8354	19.439	20.0884	19.6932	19.5324
P17742	PPIA_MOUSE	Ppia	Peptidyl-prolyl cis-trans isomerase A		1.57757	-0.352794	13	13	13	81.1	81.1	81.1	17.971	0	144.87	1536100000	439	25.214	24.9811	25.1517	25.0025	25.2171	25.5457	25.5736	25.5548
P17751	TPIS_MOUSE	Tpi1	Triosephosphate isomerase		1.19527	-0.432254	16	16	16	74.3	74.3	74.3	26.712	0	95.302	468500000	359	23.2736	23.3148	23.2132	23.0602	23.431	23.7188	24.0183	23.8583
P17809	GTR1_MOUSE	Slc2a1	Solute carrier family 2, facilitated glucose transporter member 1		0	-0.143028	6	6	6	14.2	14.2	14.2	53.984	0	13.747	37175000	22	21.5561	NaN	NaN	NaN	NaN	21.3129	22.1992	21.5854
Q61696	HS71A_MOUSE	Hspa1a	Heat shock 70 kDa protein 1A		0.932649	0.395867	25	18	12	43.1	33.1	23.1	70.078	0	75.85	130210000	105	21.9239	22.3188	21.9869	22.5531	21.9909	21.4412	22.1355	21.6396
P17932	RL32P_MOUSE	Rpl32-ps	Putative 60S ribosomal protein L32		0	NaN	2	1	1	14.8	7.4	7.4	16.011	0	3.3266	47427000	35	NaN	NaN	NaN	NaN	NaN	NaN	NaN	NaN
Q91V35	Q91V35_MOUSE	Ptpra	Receptor-type tyrosine-protein phosphatase alpha		0	NaN	2	2	2	4.2	4.2	4.2	89.841	0.001149	2.3534	2375800	10	NaN	NaN	NaN	NaN	NaN	NaN	NaN	NaN
F8WIR1	F8WIR1_MOUSE	Ctsd	Cathepsin D		0.055989	-0.0271225	20	20	20	51.5	51.5	51.5	44.215	0	111.03	502830000	221	24.2114	24.1269	24.0478	24.21	24.5117	24.0377	24.6295	24.4536
P18572	BASI_MOUSE	Bsg	Basigin		2.35349	-0.462587	9	9	9	21.9	21.9	21.9	42.444	0	44.18	487510000	134	23.6808	23.5499	23.8292	23.4442	23.2361	23.9181	24.0474	23.9667
P18581	CTR2_MOUSE	Slc7a2	Cationic amino acid transporter 2		0	NaN	1	1	1	3	3	3	71.855	0	5.0457	191100	1	NaN	NaN	NaN	NaN	NaN	NaN	NaN	NaN
P18653	KS6A1_MOUSE	Rps6ka1	Ribosomal protein S6 kinase alpha-1		0	NaN	5	5	5	8.8	8.8	8.8	81.594	0	5.1591	2995500	7	NaN	NaN	NaN	NaN	NaN	19.394	NaN	19.7896
P18760	COF1_MOUSE	Cfl1	Cofilin-1		0.602924	0.106777	16	16	14	74.1	74.1	63.3	18.559	0	132.54	254600000	140	22.4781	22.7118	22.3637	22.3995	22.6802	22.458	22.5159	22.505
P19096	FAS_MOUSE	Fasn	Fatty acid synthase		1.86486	-0.240177	181	181	181	75.7	75.7	75.7	272.43	0	323.31	24346000000	5441	28.128	28.0966	28.2111	28.0864	27.856	28.3138	28.2544	28.3485
P19157	GSTP1_MOUSE	Gstp1	Glutathione S-transferase P 1		2.3282	-0.661311	5	5	5	37.1	37.1	37.1	23.609	0	62.761	93414000	41	22.0859	21.9865	22.3069	21.7961	21.8952	22.7147	22.4576	22.9298
P19221	THRB_MOUSE	F2	Prothrombin		0	NaN	7	7	7	12.5	12.5	12.5	70.268	0	13.689	12581000	18	NaN	NaN	NaN	NaN	NaN	20.0251	20.226	NaN
P19253	RL13A_MOUSE	Rpl13a	60S ribosomal protein L13a		0.955361	0.252973	18	18	18	55.7	55.7	55.7	23.464	0	44.798	2532200000	595	26.0203	26.2044	26.1153	26.2315	26.0419	25.6169	25.7037	26.0502
P19324	SERPH_MOUSE	Serpinh1	Serpin H1		1.00839	0.195807	15	15	15	39.1	39.1	39.1	46.533	0	78.679	213350000	115	22.5197	22.8484	22.3837	22.8757	22.6112	22.5319	22.6105	22.5457
P19536	COX5B_MOUSE	Cox5b	Cytochrome c oxidase subunit 5B, mitochondrial		0.618906	0.296816	12	12	12	78.1	78.1	78.1	13.813	0	47.7	925280000	575	24.4681	24.3025	24.7683	24.7153	24.4165	23.8757	24.1964	23.8747
P19783	COX41_MOUSE	Cox4i1	Cytochrome c oxidase subunit 4 isoform 1, mitochondrial		0.646655	0.17505	14	14	7	64.5	64.5	34.3	19.53	0	101.98	2651000000	502	26.4287	26.1978	26.0902	26.1667	26.1266	26.2918	25.7575	26.0801
P20029	BIP_MOUSE	Hspa5	Endoplasmic reticulum chaperone BiP		0.18581	-0.0494041	71	71	69	72.7	72.7	72.7	72.421	0	323.31	22212000000	5381	27.1323	27.267	27.0908	27.3414	27.3606	27.4262	27.5008	27.281
P20065	TYB4_MOUSE	Tmsb4x	Thymosin beta-4		1.12782	0.382156	3	3	3	40	40	40	5.6794	0	14.007	32762000	60	20.9291	20.7993	20.5125	20.9165	20.9015	20.6838	20.0128	20.8087
P20108	PRDX3_MOUSE	Prdx3	Thioredoxin-dependent peroxide reductase, mitochondrial		0.292175	0.133045	13	13	13	55.6	55.6	55.6	28.127	0	86.323	486630000	172	24.7918	24.1401	24.122	24.3977	24.7387	24.3342	24.6687	24.4111
P20152	VIME_MOUSE	Vim	Vimentin		0.103127	0.0400724	59	59	48	91	91	79.6	53.687	0	323.31	2109600000	1275	25.0744	25.37	25.3647	25.1241	25.5993	25.039	25.2467	25.3571
P20491	FCERG_MOUSE	Fcer1g	High affinity immunoglobulin epsilon receptor subunit gamma		0	NaN	2	2	2	23.3	23.3	23.3	9.6523	0	6.5185	4069300	7	NaN	NaN	NaN	NaN	NaN	NaN	NaN	NaN
P20918	PLMN_MOUSE	Plg	Plasminogen		0.288011	0.14203	17	17	17	24	24	24	90.807	0	36.43	65925000	77	21.8212	21.4332	21.0477	21.0639	20.9317	21.2492	21.2383	21.1467
G5E8G6	G5E8G6_MOUSE	Myo5b	Unconventional myosin-Vb		0	NaN	3	1	1	2.1	0.8	0.8	210.54	0.00038745	2.5269	506060	1	NaN	NaN	NaN	NaN	NaN	NaN	NaN	NaN
P21278	GNA11_MOUSE	Gna11	Guanine nucleotide-binding protein subunit alpha-11		0	-0.0800781	8	6	6	23.7	18.4	18.4	42.024	0	18.326	17375000	18	NaN	21.3086	21.4741	21.4025	21.471	NaN	NaN	NaN
P21279	GNAQ_MOUSE	Gnaq	Guanine nucleotide-binding protein G(q) subunit alpha		0.350893	0.383705	9	9	7	26.5	26.5	21.2	42.158	0	31.381	24761000	32	21.1491	21.556	21.2474	22.1563	21.4201	20.3516	21.961	NaN
P21614	VTDB_MOUSE	Gc	Vitamin D-binding protein		1.45442	0.525972	9	9	9	18.3	18.3	18.3	53.6	0	19.835	37405000	42	20.6532	21.2721	20.6616	21.0344	NaN	20.2864	20.553	20.3413
P21619	LMNB2_MOUSE	Lmnb2	Lamin-B2		0	NaN	2	1	1	3.7	2.3	2.3	67.317	0	3.7601	590180	1	NaN	NaN	NaN	NaN	NaN	NaN	NaN	NaN
P21844	CMA1_MOUSE	Cma1	Chymase		0	0.547436	3	3	3	15.4	15.4	15.4	27.586	0	23.44	4757800	12	NaN	19.8335	19.27	NaN	NaN	NaN	19.302	NaN
P21956	MFGM_MOUSE	Mfge8	Lactadherin		0.427434	0.169027	26	26	26	51.6	51.6	51.6	51.24	0	189.77	1673400000	888	24.4519	24.9335	24.1973	24.9287	24.5722	24.6616	24.7759	24.5754
P21958	TAP1_MOUSE	Tap1	Antigen peptide transporter 1		0.291635	0.260728	10	10	10	18.4	18.4	18.4	78.863	0	27.488	35307000	81	22.0545	21.0073	21.8599	22.3788	22.5739	22.0261	21.6772	21.4083
P21981	TGM2_MOUSE	Tgm2	Protein-glutamine gamma-glutamyltransferase 2		0.02708	0.0172009	10	10	10	17.9	17.9	17.9	77.06	0	36.408	39666000	43	NaN	21.0249	20.5898	20.8122	20.9797	21.343	21.0799	20.6742
P22437	PGH1_MOUSE	Ptgs1	Prostaglandin G/H synthase 1		0.0346103	-0.0291348	12	12	12	26.2	26.2	26.2	69.042	0	26.25	111030000	65	21.8902	21.1591	22.3608	21.7384	22.1059	21.5787	21.4218	21.6487
P22599	A1AT2_MOUSE	Serpina1b	Alpha-1-antitrypsin 1-2		0.34019	-0.132541	16	6	4	41.6	16.5	8.7	45.974	0	22.201	55042000	40	21.5307	21.3914	21.0752	21.0987	21.3231	21.5444	21.5149	21.7395
P22892	AP1G1_MOUSE	Ap1g1	AP-1 complex subunit gamma-1		0.0747129	0.0670433	13	13	13	15.2	15.2	15.2	91.349	0	35.841	15946000	31	20.3021	19.7562	NaN	20.8463	NaN	20.2665	20.2059	20.231
P23116	EIF3A_MOUSE	Eif3a	Eukaryotic translation initiation factor 3 subunit A		0	-0.0989704	19	19	19	15.4	15.4	15.4	161.93	0	26.383	30414000	39	NaN	NaN	20.3654	20.1956	NaN	20.1758	20.4252	20.2117
Q543K9	Q543K9_MOUSE	Pnp	Purine nucleoside phosphorylase		0	NaN	4	4	4	17.6	17.6	17.6	32.263	0	19.672	10828000	9	NaN	NaN	NaN	NaN	NaN	20.289	21.3013	20.5764
P23591	FCL_MOUSE	Gfus	GDP-L-fucose synthase		0	NaN	3	3	3	13.4	13.4	13.4	35.877	0	86.649	6814100	10	NaN	NaN	NaN	NaN	NaN	NaN	NaN	NaN
P23780	BGAL_MOUSE	Glb1	Beta-galactosidase		0.124873	0.0660893	13	13	13	28.3	28.3	28.3	73.12	0	46.301	53484000	45	21.9807	21.3136	21.6517	NaN	21.8741	21.4746	21.6432	21.8575
P23953	EST1C_MOUSE	Ces1c	Carboxylesterase 1C		0.281242	-0.268785	8	5	5	15	9.6	9.6	61.055	0	23.684	18795000	50	19.9891	19.7169	19.6	18.8965	19.5662	20.6058	19.0752	19.963
P24270	CATA_MOUSE	Cat	Catalase		0.253588	0.0369487	30	30	30	55.4	55.4	55.4	59.795	0	122.36	584750000	402	23.2788	23.4302	23.2946	23.2538	23.3358	23.1587	23.346	23.3515
P24369	PPIB_MOUSE	Ppib	Peptidyl-prolyl cis-trans isomerase B		0.533264	-0.134869	21	21	21	70.4	70.4	70.4	23.713	0	95.538	1984600000	612	25.1931	24.9129	25.2678	24.9329	25.3062	25.3769	25.165	25.075
B7ZP10	B7ZP10_MOUSE	Cyp2d12	Cyp2d12 protein		0	NaN	1	1	1	2.9	2.9	2.9	51.874	0	5.7986	672590	1	NaN	NaN	NaN	NaN	NaN	NaN	NaN	NaN
P24527	LKHA4_MOUSE	Lta4h	Leukotriene A-4 hydrolase		0	NaN	4	4	4	7.7	7.7	7.7	69.05	0	12.282	2048500	5	NaN	NaN	NaN	NaN	NaN	NaN	NaN	NaN
P24668	MPRD_MOUSE	M6pr	Cation-dependent mannose-6-phosphate receptor		0.432209	-0.169383	10	10	10	35.3	35.3	35.3	31.172	0	98.094	175750000	116	22.4151	22.603	22.4317	22.4838	22.81	23.0877	22.5612	22.9089
P25444	RS2_MOUSE	Rps2	40S ribosomal protein S2		0.497277	0.120016	22	22	22	59.4	59.4	59.4	31.231	0	99.182	4148800000	938	26.3288	26.0556	26.1034	26.2406	26.3801	26.2065	26.3043	25.9109
P25911	LYN_MOUSE	Lyn	Tyrosine-protein kinase Lyn		0	NaN	3	2	2	5.7	4.3	4.3	58.812	0	8.7325	5631100	6	NaN	NaN	NaN	NaN	NaN	NaN	NaN	NaN
P26039	TLN1_MOUSE	Tln1	Talin-1		0.104549	-0.119364	18	18	16	10.5	10.5	9.5	269.82	0	68.269	32986000	63	19.2081	20.3097	20.6334	20.7907	20.163	19.9294	20.716	19.6701
P26040	EZRI_MOUSE	Ezr	Ezrin		0.621811	0.412402	32	22	22	52.4	36.9	36.9	69.406	0	115.41	159660000	148	21.4563	22.122	21.3733	22.1706	22.5946	21.3016	22.2043	21.8146
P26041	MOES_MOUSE	Msn	Moesin		0.958414	0.859709	22	11	11	36.7	20.1	20.1	67.766	0	22.381	24653000	37	19.5528	20.4105	20.028	20.0837	20.311	18.0802	19.5852	19.2259
P26043	RADI_MOUSE	Rdx	Radixin		0.0996054	0.0522013	44	44	32	67.6	67.6	48.2	68.542	0	194.24	651420000	495	24.2735	24.3808	24.2001	23.9086	24.8171	24.3378	24.3936	24.2398
P26231	CTNA1_MOUSE	Ctnna1	Catenin alpha-1		0.089576	0.00944424	44	44	35	54.6	54.6	48.1	100.11	0	323.31	452230000	372	22.9758	23.0911	22.9634	22.9332	23.0483	23.0298	22.9986	23.0189
P26350	PTMA_MOUSE	Ptma	Prothymosin alpha		0.124289	0.130213	4	4	4	36	36	36	12.254	0	47.416	61426000	123	22.5458	21.8234	22.0993	21.8033	22.4858	21.162	22.0786	22.7975
P26443	DHE3_MOUSE	Glud1	Glutamate dehydrogenase 1, mitochondrial		0.384851	0.154593	23	23	23	51.4	51.4	51.4	61.336	0	85.68	227680000	165	22.128	21.926	21.7476	21.6165	22.2712	22.0151	21.578	21.9827
P26516	PSMD7_MOUSE	Psmd7	26S proteasome non-ATPase regulatory subunit 7		0	NaN	7	7	7	32.1	32.1	32.1	36.539	0	17.479	16351000	18	NaN	NaN	NaN	NaN	NaN	21.0187	20.1331	20.6722
P26638	SYSC_MOUSE	Sars1	Serine--tRNA ligase, cytoplasmic		0.540696	0.190175	8	8	8	18.2	18.2	18.2	58.388	0	32.811	26847000	34	20.1936	20.1056	19.9539	20.0247	19.748	19.5178	19.7212	20.1185
P26645	MARCS_MOUSE	Marcks	Myristoylated alanine-rich C-kinase substrate		0.112228	0.0418863	14	14	14	72.2	72.2	72.2	29.661	0	139.87	111770000	229	21.5727	21.9143	21.6974	21.4197	21.8835	21.4615	21.6855	21.7781
P26883	FKB1A_MOUSE	Fkbp1a	Peptidyl-prolyl cis-trans isomerase FKBP1A		0	NaN	2	2	2	27.8	27.8	27.8	11.922	0	7.3846	17392000	14	NaN	NaN	NaN	NaN	NaN	NaN	20.7342	20.9272
P27005	S10A8_MOUSE	S100a8	Protein S100-A8		0	NaN	1	1	1	13.5	13.5	13.5	10.294	0.0093357	1.6086	570660	1	NaN	NaN	NaN	NaN	NaN	NaN	NaN	NaN
P27046	MA2A1_MOUSE	Man2a1	Alpha-mannosidase 2		1.20347	0.177588	43	43	42	38.1	38.1	37.4	131.63	0	177.3	298470000	258	22.5267	22.5576	22.4619	22.6874	22.7972	22.338	22.5005	22.5582
P27546	MAP4_MOUSE	Map4	Microtubule-associated protein 4		0	NaN	3	3	3	4	4	4	117.43	0.0011381	2.2348	463540	4	NaN	NaN	NaN	NaN	NaN	NaN	NaN	NaN
P27601	GNA13_MOUSE	Gna13	Guanine nucleotide-binding protein subunit alpha-13		0	NaN	6	5	5	20.2	18	18	44.054	0	23.471	3495900	6	NaN	NaN	NaN	NaN	NaN	NaN	NaN	NaN
P27612	PLAP_MOUSE	Plaa	Phospholipase A-2-activating protein		0	NaN	1	1	1	1.3	1.3	1.3	87.22	0	3.6462	242770	2	NaN	NaN	NaN	NaN	NaN	NaN	NaN	NaN
P27659	RL3_MOUSE	Rpl3	60S ribosomal protein L3		2.39084	-0.459158	41	41	41	71.7	71.7	71.7	46.109	0	154.96	6280800000	1738	26.9078	27.0091	27.1186	26.9548	26.8963	27.5686	27.4905	27.4269
P27773	PDIA3_MOUSE	Pdia3	Protein disulfide-isomerase A3		0.577333	-0.0762649	53	53	53	72.9	72.9	72.9	56.678	0	323.31	4953500000	1396	25.6723	25.7787	25.8236	25.7817	25.8946	25.9667	25.8743	25.7679
P27808	MGAT1_MOUSE	Mgat1	Alpha-1,3-mannosyl-glycoprotein 2-beta-N-acetylglucosaminyltransferase		0	NaN	2	2	2	5.1	5.1	5.1	51.69	0	4.6536	491030	4	NaN	NaN	NaN	NaN	NaN	NaN	NaN	NaN
P28063	PSB8_MOUSE	Psmb8	Proteasome subunit beta type-8		0	NaN	2	2	2	8	8	8	30.26	0	5.9224	1586900	4	NaN	NaN	NaN	NaN	NaN	NaN	NaN	NaN
P28230	CXB1_MOUSE	Gjb1	Gap junction beta-1 protein		0	NaN	4	4	4	12.7	12.7	12.7	32.003	0	8.3717	13795000	12	NaN	NaN	NaN	NaN	NaN	19.608	19.9175	19.9774
P28271	ACOC_MOUSE	Aco1	Cytoplasmic aconitate hydratase		0.0930822	-0.0605621	19	19	19	29.7	29.7	29.7	98.124	0	43.168	77069000	78	21.7278	20.964	21.2392	21.2266	21.8858	21.5467	21.7274	21.5332
P28352	APEX1_MOUSE	Apex1	DNA-(apurinic or apyrimidinic site) endonuclease		0	NaN	3	3	3	12.9	12.9	12.9	35.49	0	3.9858	1209700	5	NaN	NaN	NaN	NaN	NaN	NaN	NaN	NaN
P28474	ADHX_MOUSE	Adh5	Alcohol dehydrogenase class-3		0	NaN	4	4	4	23	23	23	39.547	0	15.843	8021600	9	NaN	NaN	NaN	NaN	NaN	NaN	NaN	NaN
P28653	PGS1_MOUSE	Bgn	Biglycan		1.02434	0.337419	6	5	5	19.8	17.6	17.6	41.639	0	11.469	21334000	20	20.3662	20.5856	20.5146	20.3226	20.6041	19.8972	20.247	19.87
P28654	PGS2_MOUSE	Dcn	Decorin		0.296291	-0.14258	11	11	10	36.4	36.4	34.2	39.809	0	60.299	86396000	88	21.6987	22.0374	21.8612	22.0138	21.3033	21.779	22.2154	21.7679
P28660	NCKP1_MOUSE	Nckap1	Nck-associated protein 1		0	NaN	4	4	4	3.5	3.5	3.5	128.78	0	11.191	4071000	8	NaN	NaN	NaN	NaN	NaN	NaN	NaN	NaN
P28667	MRP_MOUSE	Marcksl1	MARCKS-related protein		0.0456061	-0.0227046	3	3	3	31	31	31	20.165	0	35.891	36623000	57	21.4852	21.1283	21.1907	20.9152	21.5505	21.5376	21.1478	21.2939
P28843	DPP4_MOUSE	Dpp4	Dipeptidyl peptidase 4		0.0219564	0.0116105	8	8	8	12.4	12.4	12.4	87.436	0	32.575	23467000	29	20.6038	20.3854	19.9901	20.0031	19.9744	20.1862	20.3034	20.4405
P29341	PABP1_MOUSE	Pabpc1	Polyadenylate-binding protein 1		0.426949	0.503859	38	38	12	58.6	58.6	25.2	70.67	0	238.33	1760500000	535	26.0274	24.3473	24.6817	25.6486	25.7036	25.4856	23.9866	25.5577
P29351	PTN6_MOUSE	Ptpn6	Tyrosine-protein phosphatase non-receptor type 6		0	NaN	2	2	2	3.7	3.7	3.7	67.558	0	4.2399	961810	3	NaN	NaN	NaN	NaN	NaN	NaN	NaN	NaN
P29387	GBB4_MOUSE	Gnb4	Guanine nucleotide-binding protein subunit beta-4		1.75759	-0.417606	11	6	6	41.5	31.5	31.5	37.379	0	21.768	35712000	50	20.763	NaN	NaN	21.0921	20.923	21.3205	21.2725	21.4379
A0A2I3BRG0	A0A2I3BRG0_MOUSE	Nedd8	NEDD8 (Fragment)		0	NaN	1	1	1	61.1	61.1	61.1	1.9311	0	3.9946	8357200	16	NaN	NaN	NaN	NaN	NaN	NaN	NaN	NaN
P29699	FETUA_MOUSE	Ahsg	Alpha-2-HS-glycoprotein		0.368218	-0.117263	9	9	8	38	38	35.9	37.325	0	36.282	99159000	82	22.645	22.6645	22.6991	22.575	22.1178	22.6934	22.4924	22.5866
P29752	LALBA_MOUSE	Lalba	Alpha-lactalbumin		0.039816	0.0140185	6	6	6	28.7	28.7	28.7	16.26	0	144.41	897320000	333	24.9812	25.0439	24.6947	24.6164	24.7995	24.8543	25.049	24.787
P29758	OAT_MOUSE	Oat	Ornithine aminotransferase, mitochondrial		0	NaN	6	6	6	21.2	21.2	21.2	48.354	0	57.63	13499000	13	NaN	NaN	NaN	NaN	NaN	20.3719	NaN	20.2134
P29788	VTNC_MOUSE	Vtn	Vitronectin		0.618702	0.400447	6	6	6	17.4	17.4	17.4	54.848	0	19.7	34348000	37	21.4721	20.843	20.2062	20.6257	20.9206	20.7631	21.1766	20.1138
P30115	GSTA3_MOUSE	Gsta3	Glutathione S-transferase A3		0	NaN	3	3	3	14.5	14.5	14.5	25.36	0	7.0482	8511000	9	NaN	NaN	NaN	NaN	NaN	20.5115	NaN	21.1793
P30275	KCRU_MOUSE	Ckmt1	Creatine kinase U-type, mitochondrial		0	NaN	1	1	1	3.8	3.8	3.8	47.003	0	5.5211	2157500	4	NaN	NaN	NaN	NaN	NaN	NaN	NaN	NaN
P30416	FKBP4_MOUSE	Fkbp4	Peptidyl-prolyl cis-trans isomerase FKBP4		0.440477	0.305803	8	8	8	20.3	20.3	20.3	51.572	0	19.874	16609000	37	19.9606	19.6194	19.8618	19.9971	19.2248	18.9425	18.9716	19.8028
P30678	GNA15_MOUSE	Gna15	Guanine nucleotide-binding protein subunit alpha-15		0	NaN	1	1	1	3.5	3.5	3.5	43.535	0	4.7419	203870	1	NaN	NaN	NaN	NaN	NaN	NaN	NaN	NaN
G3X9V2	G3X9V2_MOUSE	Ctnnd1	Catenin delta-1		0.0844552	-0.0264716	31	31	1	36.8	36.8	1.3	104.1	0	180.63	264610000	214	22.7177	22.6777	22.7564	22.7608	22.4701	22.4886	22.9081	22.5791
P31001	DESM_MOUSE	Des	Desmin		0	NaN	9	3	3	14.7	7.5	7.5	53.497	0	7.7571	70446000	13	NaN	NaN	NaN	NaN	NaN	NaN	NaN	NaN
P31230	AIMP1_MOUSE	Aimp1	Aminoacyl tRNA synthase complex-interacting multifunctional protein 1		0.459488	0.173167	8	8	8	37.1	37.1	37.1	33.997	0	17.199	27630000	50	20.7974	20.9277	20.4863	20.4492	20.3724	20.75	20.3046	20.3131
H3BK84	H3BK84_MOUSE	Prkar2b	cAMP-dependent protein kinase type II-beta regulatory subunit		0	NaN	2	1	1	13.7	7.8	7.8	28.463	0.0069166	1.745	214960	2	NaN	NaN	NaN	NaN	NaN	NaN	NaN	NaN
P31428	DPEP1_MOUSE	Dpep1	Dipeptidase 1		0	-0.142573	5	5	5	14.1	14.1	14.1	45.722	0	13.107	13302000	12	NaN	NaN	NaN	21.3791	NaN	21.8035	22.1863	20.5752
P31725	S10A9_MOUSE	S100a9	Protein S100-A9		0.0714401	-0.190648	6	6	6	47.8	47.8	47.8	13.049	0	15.164	71388000	56	21.15	23.6733	21.1598	21.7291	NaN	23.5665	23.1895	21.5833
P31786	ACBP_MOUSE	Dbi	Acyl-CoA-binding protein		0.69965	0.378613	5	5	5	57.5	57.5	57.5	10	0	17.968	310970000	64	24.5541	24.3063	24.4423	23.9621	24.61	24.2296	23.4885	23.7576
Q925P3	Q925P3_MOUSE	Ceacam1	CEA-related cell adhesion molecule 1		0	-0.22518	3	3	3	7.7	7.7	7.7	56.985	0	7.467	4569800	8	NaN	19.7573	19.9825	NaN	NaN	NaN	NaN	NaN
P31938	MP2K1_MOUSE	Map2k1	Dual specificity mitogen-activated protein kinase kinase 1		0	NaN	2	2	2	5.6	5.6	5.6	43.474	0	5.7112	913670	3	NaN	NaN	NaN	NaN	NaN	NaN	NaN	NaN
P32020	NLTP_MOUSE	Scp2	Non-specific lipid-transfer protein		0.00549569	-0.00278568	12	12	12	14.4	14.4	14.4	59.125	0	43.231	224660000	164	22.8402	23.2048	22.6981	22.62	22.6091	22.6387	23.0658	22.8828
P32067	LA_MOUSE	Ssb	Lupus La protein homolog		0	NaN	4	4	4	12.3	12.3	12.3	47.756	0	9.7689	1838200	7	NaN	NaN	NaN	NaN	NaN	NaN	NaN	NaN
A0A0A6YWH7	A0A0A6YWH7_MOUSE	Serpinc1	Antithrombin-III (Fragment)		0.553404	0.38065	4	4	4	14	14	14	31.944	0	5.5337	9767100	15	21.0883	20.1467	NaN	20.7331	NaN	20.443	20.0147	20.3684
P32507	NECT2_MOUSE	Nectin2	Nectin-2		0	-0.229514	5	5	5	12.3	12.3	12.3	57.317	0	11.953	7141800	12	19.5036	NaN	NaN	NaN	NaN	19.7723	19.5124	19.9146
P32848	PRVA_MOUSE	Pvalb	Parvalbumin alpha		0	0.979753	7	7	7	61.8	61.8	61.8	11.93	0	19.433	27413000	25	NaN	21.3775	NaN	21.0839	21.5059	NaN	20.3427	NaN
P32883	RASK_MOUSE	Kras	GTPase KRas		0.890797	-0.913456	4	4	4	33.9	33.9	33.9	21.656	0	14.816	29777000	33	NaN	20.0491	20.857	21.0433	NaN	22.0391	21.359	21.5836
P32921	SYWC_MOUSE	Wars1	Tryptophan--tRNA ligase, cytoplasmic		0	NaN	1	1	1	3.3	3.3	3.3	54.357	0.0072516	1.7094	958840	1	NaN	NaN	NaN	NaN	NaN	NaN	NaN	NaN
A0A0U1RPL9	A0A0U1RPL9_MOUSE	Cyp2f2	Cytochrome P450 2F2 (Fragment)		0	NaN	3	3	3	14.9	14.9	14.9	23.98	0	4.9461	3872300	5	NaN	NaN	NaN	NaN	NaN	NaN	NaN	NaN
P33622	APOC3_MOUSE	Apoc3	Apolipoprotein C-III		0	NaN	1	1	1	19.2	19.2	19.2	10.982	0	23.028	8110900	5	NaN	NaN	NaN	NaN	NaN	20.3732	19.9486	19.4908
P34022	RANG_MOUSE	Ranbp1	Ran-specific GTPase-activating protein		0	NaN	2	2	2	9.9	9.9	9.9	23.596	0	5.202	5127300	14	NaN	NaN	19.2152	NaN	NaN	NaN	18.5198	17.8936
P34884	MIF_MOUSE	Mif	Macrophage migration inhibitory factor		0	-0.0498457	2	2	2	17.4	17.4	17.4	12.504	0	6.2064	37393000	28	22.7957	22.4316	22.3228	22.3055	21.5591	NaN	NaN	NaN
P34914	HYES_MOUSE	Ephx2	Bifunctional epoxide hydrolase 2		0	-0.198038	3	3	3	9.6	9.6	9.6	62.515	0	15.692	9161500	8	NaN	NaN	19.4054	19.2074	NaN	NaN	NaN	NaN
P35276	RAB3D_MOUSE	Rab3d	Ras-related protein Rab-3D		0	-1.09557	5	3	2	27.4	20.5	11.9	24.416	0	29.206	32656000	16	NaN	21.2255	21.4546	NaN	NaN	21.9917	23.5717	22.2664
P35278	RAB5C_MOUSE	Rab5c	Ras-related protein Rab-5C		0.415569	-0.12735	8	8	5	47.7	47.7	32.9	23.412	0	90.878	159180000	140	22.7267	23.1968	22.9981	22.8773	22.7825	23.1962	22.7959	23.1023
P35279	RAB6A_MOUSE	Rab6a	Ras-related protein Rab-6A		0.432839	0.146029	13	13	4	57.7	57.7	22.6	23.59	0	120.45	641340000	214	25.1853	25.2109	25.5372	25.4028	25.299	25.1058	24.9499	24.9211
P35282	RAB21_MOUSE	Rab21	Ras-related protein Rab-21		1.08046	-0.616818	8	8	8	41.4	41.4	41.4	24.106	0	106.13	30138000	41	19.9699	20.2803	20.0842	20.4843	19.4608	20.7698	20.8907	20.9178
P35293	RAB18_MOUSE	Rab18	Ras-related protein Rab-18		1.43791	-0.439868	21	21	21	85	85	85	23.035	0	240.85	882070000	376	24.3411	24.2021	24.5182	23.7735	24.139	24.7188	24.2543	24.7239
P35486	ODPA_MOUSE	Pdha1	Pyruvate dehydrogenase E1 component subunit alpha, somatic form, mitochondrial		0.213092	0.0872779	33	33	33	73.1	73.1	73.1	43.231	0	195.34	1304000000	734	25.3177	24.9379	25.098	24.6467	25.2439	24.8341	24.9206	24.9443
P35505	FAAA_MOUSE	Fah	Fumarylacetoacetase		1.04424	-0.118731	12	12	12	40.3	40.3	40.3	46.175	0	81.286	138610000	158	22.4708	22.5786	22.5821	22.3452	22.5483	22.5712	22.5778	22.6868
P35564	CALX_MOUSE	Canx	Calnexin		0.275171	-0.0440807	41	41	41	52.6	52.6	52.6	67.277	0	218.77	1454100000	669	24.9685	25.1787	25.2917	25.1741	25.159	25.1147	25.1319	25.1182
P35585	AP1M1_MOUSE	Ap1m1	AP-1 complex subunit mu-1		0	NaN	4	1	1	11.3	4.7	4.7	48.542	0.0011372	2.2152	1179900	2	NaN	NaN	NaN	NaN	NaN	NaN	NaN	NaN
P35700	PRDX1_MOUSE	Prdx1	Peroxiredoxin-1		0.842552	-0.253687	19	18	18	71.4	71.4	71.4	22.176	0	57.438	701980000	259	24.189	24.6416	24.4569	24.6814	24.3177	24.7785	24.7306	24.8784
P35762	CD81_MOUSE	Cd81	CD81 antigen		0.114882	-0.064806	2	2	2	19.1	19.1	19.1	25.814	0	14.19	158390000	32	24.6464	24.8507	NaN	NaN	NaN	24.6511	24.9756	NaN
P35821	PTN1_MOUSE	Ptpn1	Tyrosine-protein phosphatase non-receptor type 1		0.457231	0.298075	9	9	9	27.1	27.1	27.1	49.593	0	27.055	16270000	23	NaN	20.8601	NaN	20.6206	20.4304	19.9808	20.8258	20.2104
P35846	FOLR1_MOUSE	Folr1	Folate receptor alpha		0.877691	0.188563	12	12	12	49.4	49.4	49.4	29.449	0	63.814	360520000	185	23.2395	23.1914	23.2213	23.388	23.6184	23.042	23.1456	23.2741
A0A1L1SRE8	A0A1L1SRE8_MOUSE	Ldlr	Low-density lipoprotein receptor		1.18106	0.379858	10	10	10	15.7	15.7	15.7	89.44	0	81.632	33988000	56	20.9032	20.8535	20.62	20.4651	20.5556	20.4307	20.1634	20.0439
P35979	RL12_MOUSE	Rpl12	60S ribosomal protein L12		0.0171574	0.00801468	11	11	11	70.9	70.9	70.9	17.804	0	156.96	2655500000	476	26.5003	26.242	26.1066	26.3567	25.9715	26.1699	26.5923	26.1697
P35980	RL18_MOUSE	Rpl18	60S ribosomal protein L18		0.999654	-0.498435	15	15	5	48.4	48.4	10.6	21.644	0	80.745	4243600000	962	26.9278	27.0212	26.9204	26.9317	26.958	27.7275	27.1526	28.032
P36371	TAP2_MOUSE	Tap2	Antigen peptide transporter 2		0.0478914	-0.029819	16	16	16	25.8	25.8	25.8	77.444	0	77.49	69816000	68	20.3892	20.7297	20.7647	21.3356	21.1139	21.0429	20.8946	20.9856
P36552	HEM6_MOUSE	Cpox	Oxygen-dependent coproporphyrinogen-III oxidase, mitochondrial		0	-0.217383	8	8	8	24.4	24.4	24.4	49.714	0	20.226	18533000	18	NaN	20.2177	20.5107	NaN	NaN	20.149	20.6167	20.464
P37040	NCPR_MOUSE	Por	NADPH--cytochrome P450 reductase		0.778035	-0.163998	41	41	41	59.9	59.9	59.9	77.043	0	323.31	985700000	527	23.4495	23.4184	23.598	23.687	23.2898	23.6067	23.7996	23.4964
P37804	TAGL_MOUSE	Tagln	Transgelin		0.847806	-0.155621	15	15	15	73.6	73.6	73.6	22.576	0	44.635	119110000	100	22.3672	22.2614	22.353	22.4341	22.2703	22.6405	22.34	22.6219
P38060	HMGCL_MOUSE	Hmgcl	Hydroxymethylglutaryl-CoA lyase, mitochondrial		1.86261	0.171202	7	7	7	23.7	23.7	23.7	34.238	0	39.263	49941000	35	21.93	22.0924	21.8845	NaN	22.0284	21.7908	21.8458	21.8618
P38647	GRP75_MOUSE	Hspa9	Stress-70 protein, mitochondrial		0.630563	0.119873	40	40	40	55.1	55.1	55.1	73.46	0	323.31	1071600000	626	24.1911	24.1039	24.0637	23.992	24.2068	24.0682	23.7772	24.1053
Q3T9X3	Q3T9X3_MOUSE	Dnm2	Dynamin GTPase		0	NaN	9	9	6	12.3	12.3	7.7	97.194	0	48.785	9305100	14	NaN	NaN	NaN	NaN	NaN	20.286	NaN	20.4388
A0A0G2JGT9	A0A0G2JGT9_MOUSE	Man1a2	Mannosyl-oligosaccharide 1,2-alpha-mannosidase IB		0	NaN	1	1	1	13.9	13.9	13.9	13.473	0	3.0621	625170	1	NaN	NaN	NaN	NaN	NaN	NaN	NaN	NaN
B9EHJ3	B9EHJ3_MOUSE	Tjp1	Tight junction protein ZO-1		2.05395	-1.29375	25	25	25	20	20	20	188.85	0	71.649	75019000	86	19.8303	20.7003	20.8347	20.1547	19.3337	21.1857	21.5757	21.5981
P40124	CAP1_MOUSE	Cap1	Adenylyl cyclase-associated protein 1		0.391292	-0.135867	13	13	13	31.9	31.9	31.9	51.564	0	230.71	104680000	108	22.4219	22.5259	22.3377	22.2909	22.2609	22.2435	22.8619	22.6
P40142	TKT_MOUSE	Tkt	Transketolase		1.10424	-0.189917	42	42	42	67.7	67.7	67.7	67.63	0	297.69	2953200000	943	25.3035	25.2309	25.2918	25.1207	25.2854	25.2826	25.5513	25.5745
P40237	CD82_MOUSE	Cd82	CD82 antigen		0.468333	-0.290591	5	5	5	12.4	12.4	12.4	29.628	0	23.816	29151000	33	20.2629	19.8474	20.2011	20.7221	20.0151	20.8175	20.8953	20.096
P40240	CD9_MOUSE	Cd9	CD9 antigen		0	-0.584101	4	4	4	19	19	19	25.258	0	18.989	24605000	10	NaN	23.7894	24.3735	NaN	NaN	NaN	NaN	NaN
P40336	VP26A_MOUSE	Vps26a	Vacuolar protein sorting-associated protein 26A		0	NaN	1	1	1	5.5	5.5	5.5	38.113	0	2.8195	0	1	NaN	NaN	NaN	NaN	NaN	NaN	NaN	NaN
P40936	INMT_MOUSE	Inmt	Indolethylamine N-methyltransferase		0	NaN	1	1	1	4.2	4.2	4.2	29.459	0.0040756	1.9285	602250	1	NaN	NaN	NaN	NaN	NaN	NaN	NaN	NaN
P41105	RL28_MOUSE	Rpl28	60S ribosomal protein L28		0.411666	0.111169	16	16	16	63.5	63.5	63.5	15.733	0	57.787	2236300000	902	26.4151	26.411	26.4402	26.4281	26.5492	26.3744	26.0099	26.5341
P41216	ACSL1_MOUSE	Acsl1	Long-chain-fatty-acid--CoA ligase 1		1.44437	-0.345992	64	64	60	79.8	79.8	77.4	77.951	0	323.31	26239000000	4256	28.4082	28.1063	28.3349	28.1242	28.1755	28.7683	28.3961	28.6989
A0A3Q4EC00	A0A3Q4EC00_MOUSE	Eci1	Enoyl-CoA delta isomerase 1, mitochondrial		1.16132	-0.257329	7	7	7	31.9	31.9	31.9	27.842	0	65.794	174580000	91	22.7048	22.8647	22.8852	22.742	22.5676	23.2631	22.815	22.9451
E9Q3V6	E9Q3V6_MOUSE	Septin2	Septin-2		0	0.775488	6	6	6	21.2	21.2	21.2	36.978	0	19.623	6491500	15	NaN	18.4203	17.6448	NaN	NaN	NaN	NaN	NaN
Q99K94	Q99K94_MOUSE	Stat1	Signal transducer and activator of transcription		0	NaN	1	1	1	1.7	1.7	1.7	83.106	0	4.8343	275970	1	NaN	NaN	NaN	NaN	NaN	NaN	NaN	NaN
P42227	STAT3_MOUSE	Stat3	Signal transducer and activator of transcription 3		0	0.260653	3	3	3	5.8	5.8	5.8	88.053	0	12.132	4448900	10	20.1873	NaN	NaN	NaN	NaN	NaN	NaN	19.9266
P42232	STA5B_MOUSE	Stat5b	Signal transducer and activator of transcription 5B		0	NaN	1	1	1	1.3	1.3	1.3	90.001	0.0022447	1.9948	672990	2	NaN	NaN	NaN	NaN	NaN	NaN	NaN	NaN
A0A0R4J0A0	A0A0R4J0A0_MOUSE	Eps15	Epidermal growth factor receptor substrate 15		0	NaN	3	3	3	6.9	6.9	6.9	64.312	0	25.817	1242600	4	NaN	NaN	NaN	NaN	NaN	NaN	NaN	NaN
P42669	PURA_MOUSE	Pura	Transcriptional activator protein Pur-alpha		0	NaN	1	1	1	8.1	8.1	8.1	34.883	0	17.694	464010	1	NaN	NaN	NaN	NaN	NaN	NaN	NaN	NaN
P42867	GPT_MOUSE	Dpagt1	UDP-N-acetylglucosamine--dolichyl-phosphate N-acetylglucosaminephosphotransferase		0	NaN	4	4	4	8	8	8	46.412	0	6.239	18908000	27	NaN	NaN	20.387	NaN	NaN	20.528	NaN	20.2073
P42932	TCPQ_MOUSE	Cct8	T-complex protein 1 subunit theta		0.210629	-0.0790033	21	21	21	39.8	39.8	39.8	59.555	0	62.536	102460000	105	22.1924	22.7076	22.4415	22.0276	22.3172	22.4415	22.2874	22.3903
P43024	CX6A1_MOUSE	Cox6a1	Cytochrome c oxidase subunit 6A1, mitochondrial		0	0.347237	4	4	4	61.3	61.3	61.3	12.352	0	18.503	347170000	31	NaN	25.7559	24.9799	25.0782	25.1473	NaN	NaN	NaN
P43274	H14_MOUSE	H1-4	Histone H1.4		0	NaN	2	1	1	14.6	9.6	9.6	21.977	0.0044231	1.8883	4104800	3	NaN	NaN	NaN	NaN	NaN	NaN	NaN	NaN
A2AKI5	A2AKI5_MOUSE	Itgav	Integrin alpha-V		0.0931566	0.0373888	21	21	21	23.1	23.1	23.1	111.51	0	59.215	60766000	117	20.7684	21.2107	20.963	21.025	21.2407	21.0079	20.8291	21.2952
P43883	PLIN2_MOUSE	Plin2	Perilipin-2		1.37361	0.54909	11	11	11	34.8	34.8	34.8	46.646	0	33.234	44030000	39	21.3016	21.5489	21.0025	22.1633	21.5789	21.2846	21.2779	20.8313
P45376	ALDR_MOUSE	Akr1b1	Aldo-keto reductase family 1 member B1		0.0940188	0.0651903	10	10	10	32.9	32.9	32.9	35.732	0	26.225	36746000	42	21.4014	20.8517	20.8484	NaN	21.1562	20.9043	21.6084	20.9238
P45700	MA1A1_MOUSE	Man1a1	Mannosyl-oligosaccharide 1,2-alpha-mannosidase IA		0	NaN	1	1	1	1.7	1.7	1.7	73.275	0	3.9196	1454200	2	NaN	NaN	NaN	NaN	NaN	NaN	NaN	NaN
P45878	FKBP2_MOUSE	Fkbp2	Peptidyl-prolyl cis-trans isomerase FKBP2		0	0.265606	8	8	8	70	70	70	15.344	0	16.755	94763000	35	22.5877	NaN	NaN	NaN	NaN	22.2792	22.23	22.4571
P45952	ACADM_MOUSE	Acadm	Medium-chain specific acyl-CoA dehydrogenase, mitochondrial		1.31898	-0.389934	13	13	13	34	34	34	46.481	0	59.063	92784000	84	21.512	21.5427	21.6076	20.9656	21.2285	21.5392	21.766	21.8959
P46061	RAGP1_MOUSE	Rangap1	Ran GTPase-activating protein 1		0	NaN	1	1	1	2.2	2.2	2.2	63.53	0.0072464	1.7057	153680	1	NaN	NaN	NaN	NaN	NaN	NaN	NaN	NaN
P46460	NSF_MOUSE	Nsf	Vesicle-fusing ATPase		0	-0.140289	7	7	7	11	11	11	82.613	0	22.765	10709000	20	19.1767	NaN	NaN	NaN	NaN	19.2061	19.4127	19.3322
P46467	VPS4B_MOUSE	Vps4b	Vacuolar protein sorting-associated protein 4B		0	NaN	2	2	2	6.1	6.1	6.1	49.419	0	3.4745	627660	2	NaN	NaN	NaN	NaN	NaN	NaN	NaN	NaN
P46471	PRS7_MOUSE	Psmc2	26S proteasome regulatory subunit 7		1.18662	0.183351	10	10	10	23.8	23.8	23.8	48.647	0	20.959	22494000	31	20.3173	20.361	20.0527	20.4236	NaN	20.3486	20.1417	20.1927
P46638	RB11B_MOUSE	Rab11b	Ras-related protein Rab-11B		0.460518	-0.0530024	14	14	13	60.6	60.6	56.9	24.489	0	143.46	792610000	256	24.0172	24.0883	24.1456	24.0387	24.2349	24.1128	24.1386	24.1941
P46656	ADX_MOUSE	Fdx1	Adrenodoxin, mitochondrial		0	NaN	4	4	4	19.1	19.1	19.1	20.123	0	5.4635	7108800	14	19.653	NaN	NaN	NaN	19.4282	NaN	NaN	NaN
P46935	NEDD4_MOUSE	Nedd4	E3 ubiquitin-protein ligase NEDD4		0.433224	0.226905	5	5	5	7.2	7.2	7.2	102.71	0	16.936	14464000	31	20.0817	20.5566	20.7031	20.9009	20.7735	20.0107	20.2328	20.4584
P46978	STT3A_MOUSE	Stt3a	Dolichyl-diphosphooligosaccharide--protein glycosyltransferase subunit STT3A		0.456999	0.0373073	27	27	26	28.5	28.5	28.5	80.597	0	84.076	1028500000	425	24.4496	24.3496	24.4234	24.4058	24.3496	24.2928	24.3297	24.3594
Q3ULB1	Q3ULB1_MOUSE	Tes	Testin		0	NaN	2	2	2	8.3	8.3	8.3	46.586	0	3.1188	3744200	4	NaN	NaN	NaN	NaN	NaN	18.8992	NaN	19.0759
P47738	ALDH2_MOUSE	Aldh2	Aldehyde dehydrogenase, mitochondrial		0.19803	0.0350261	30	30	30	54.5	54.5	54.5	56.537	0	212.79	644070000	313	23.8667	23.8794	23.7741	23.7529	23.9282	23.9947	23.7278	23.7904
P47740	AL3A2_MOUSE	Aldh3a2	Aldehyde dehydrogenase family 3 member A2		0.761653	-0.202868	24	24	24	41.5	41.5	41.5	53.97	0	65.526	323230000	193	22.5286	22.6997	22.5257	22.5081	22.5321	23.0838	22.6295	22.8411
P47754	CAZA2_MOUSE	Capza2	F-actin-capping protein subunit alpha-2		0.210121	-0.0948048	10	10	8	47.6	47.6	38.1	32.967	0	84.713	119940000	81	22.651	22.6504	22.2686	22.456	22.2484	22.4588	22.9733	22.6844
P47757	CAPZB_MOUSE	Capzb	F-actin-capping protein subunit beta		0	NaN	11	1	1	41.2	4.7	4.7	31.345	0	4.7859	1942500	3	NaN	NaN	NaN	NaN	NaN	NaN	NaN	NaN
P47758	SRPRB_MOUSE	Srprb	Signal recognition particle receptor subunit beta		1.22705	0.163773	22	22	22	74	74	74	29.579	0	146.59	1718400000	439	25.446	25.5231	25.3547	25.589	25.317	25.204	25.3793	25.282
P47791	GSHR_MOUSE	Gsr	Glutathione reductase, mitochondrial		0	NaN	1	1	1	4.2	4.2	4.2	53.662	0	6.1963	2744500	2	NaN	NaN	NaN	NaN	NaN	NaN	NaN	NaN
Q8R5C0	Q8R5C0_MOUSE	Mtx1	Metaxin		0.873755	0.300979	15	15	3	47.9	47.9	7.3	35.646	0	69.449	108100000	85	22.6406	22.7046	22.5217	22.5593	22.2619	22.4378	21.9161	22.0868
P47856	GFPT1_MOUSE	Gfpt1	Glutamine--fructose-6-phosphate aminotransferase [isomerizing] 1		0	0.383355	5	5	5	9.2	9.2	9.2	78.538	0	33.206	6928900	17	19.4354	19.4463	19.0575	NaN	NaN	NaN	NaN	NaN
P47911	RL6_MOUSE	Rpl6	60S ribosomal protein L6		0.409502	0.0664487	30	30	30	59.1	59.1	59.1	33.509	0	195.39	5358900000	1016	27.802	27.6934	27.4849	27.6879	27.6085	27.6984	27.7535	27.5891
P47915	RL29_MOUSE	Rpl29	60S ribosomal protein L29		2.63978	-0.623227	8	8	8	42.5	42.5	42.5	17.587	0	12.049	689580000	361	24.9106	24.9011	25.3663	25.2145	24.8837	25.8071	25.5504	25.679
H7BX88	H7BX88_MOUSE	Crat	Carnitine O-acetyltransferase		0	NaN	3	3	3	5	5	5	68.644	0	6.3255	2836000	7	NaN	NaN	NaN	NaN	NaN	NaN	NaN	NaN
P47955	RLA1_MOUSE	Rplp1	60S acidic ribosomal protein P1		0.147047	-0.125637	6	6	6	95.6	95.6	95.6	11.475	0	133.44	2617000000	127	28.5262	28.3294	27.7034	28.6406	28.4776	29.1273	28.9665	28.6791
P47962	RL5_MOUSE	Rpl5	60S ribosomal protein L5		0.0269684	0.0246882	24	24	24	66.3	66.3	66.3	34.4	0	130.72	1847200000	854	24.7017	25.5117	25.2952	25.6789	25.005	25.3715	25.5631	24.5687
P47963	RL13_MOUSE	Rpl13	60S ribosomal protein L13		0.52897	-0.114611	21	21	21	64.9	64.9	64.9	24.305	0	63.435	2518800000	639	25.9623	26.1572	26.0544	26.1025	25.8029	26.0698	26.3041	26.0552
P47968	RPIA_MOUSE	Rpia	Ribose-5-phosphate isomerase		0	NaN	1	1	1	6.3	6.3	6.3	32.45	0	3.0454	3903900	5	NaN	NaN	NaN	NaN	NaN	NaN	NaN	NaN
P48024	EIF1_MOUSE	Eif1	Eukaryotic translation initiation factor 1		0.451572	-0.368931	5	5	5	75.2	75.2	75.2	12.746	0	23.416	20595000	18	NaN	20.4707	NaN	NaN	19.8775	20.4346	20.9251	20.2693
P48036	ANXA5_MOUSE	Anxa5	Annexin A5		0.767738	-0.156787	28	28	28	70.8	70.8	70.8	35.752	0	134.67	706030000	352	23.6912	23.8202	23.9304	23.4805	23.5987	23.8028	23.8768	23.6076
A0A571BEG4	A0A571BEG4_MOUSE	Epb41	Band 4.1		0	0.450831	6	6	6	13.1	13.1	13.1	66.597	0	30.499	9868800	16	19.735	NaN	NaN	NaN	NaN	19.2902	NaN	19.2782
A0A1Y7VJ48	A0A1Y7VJ48_MOUSE	Tbca	Tubulin-specific chaperone A		0	NaN	4	4	4	52.4	52.4	52.4	9.9271	0	22.652	13723000	14	NaN	NaN	18.5815	NaN	NaN	19.9188	18.8436	20.4937
E9Q6P2	E9Q6P2_MOUSE	Ppp3cb	Serine/threonine-protein phosphatase		0	NaN	2	2	2	4.4	4.4	4.4	56.098	0.0086518	1.6305	3704500	6	NaN	NaN	NaN	NaN	NaN	NaN	NaN	NaN
P48678	LMNA_MOUSE	Lmna	Prelamin-A/C		0.554833	-0.393972	21	21	20	31	31	29.8	74.237	0	61.144	32036000	58	19.4789	19.731	19.3466	20.019	18.9725	20.4128	19.747	20.2709
P48758	CBR1_MOUSE	Cbr1	Carbonyl reductase [NADPH] 1		0.48913	-0.197878	11	11	11	45.8	45.8	45.8	30.641	0	46.181	35949000	48	21.0628	20.9131	20.7662	20.8649	20.7257	21.5548	20.9223	21.1147
P48771	CX7A2_MOUSE	Cox7a2	Cytochrome c oxidase subunit 7A2, mitochondrial		0.837868	0.420913	2	2	2	27.7	27.7	27.7	9.2908	0	12.591	175960000	95	23.7613	23.0569	23.1054	22.7506	23.0368	22.6718	22.6448	22.5001
P48962	ADT1_MOUSE	Slc25a4	ADP/ATP translocase 1		1.97446	0.517635	31	14	14	74.5	34.9	34.9	32.904	0	59.688	575530000	170	24.7275	24.9345	24.658	25.0186	24.8223	24.1611	24.4764	24.137
P49070	CAMLG_MOUSE	Camlg	Calcium signal-modulating cyclophilin ligand		0	NaN	4	4	4	19.7	19.7	19.7	32.542	0	16.72	13817000	15	NaN	NaN	NaN	NaN	NaN	20.174	19.7408	20.2092
P49282	NRAM2_MOUSE	Slc11a2	Natural resistance-associated macrophage protein 2		0	NaN	2	2	2	6	6	6	62.367	0	24.76	4103400	14	NaN	NaN	NaN	NaN	NaN	NaN	NaN	NaN
P49290	PERE_MOUSE	Epx	Eosinophil peroxidase		0	0.916778	13	13	13	19.7	19.7	19.7	81.379	0	31.943	30116000	30	NaN	21.5545	21.0344	NaN	NaN	18.3897	22.681	20.4457
A2CF65	A2CF65_MOUSE	Clec10a	C-type lectin domain family 10 member A (Fragment)		0	NaN	3	1	1	18.7	4.7	4.7	24.516	0.00076894	2.4101	406170	1	NaN	NaN	NaN	NaN	NaN	NaN	NaN	NaN
P49722	PSA2_MOUSE	Psma2	Proteasome subunit alpha type-2		0	NaN	6	6	6	34.2	34.2	34.2	25.926	0	23.145	19911000	19	NaN	NaN	NaN	NaN	NaN	20.625	20.9018	20.3293
P49769	PSN1_MOUSE	Psen1	Presenilin-1		0	0.391055	3	3	3	9.4	9.4	9.4	52.639	0	48.165	2484400	8	NaN	18.4382	18.4753	NaN	NaN	NaN	17.619	NaN
P49817	CAV1_MOUSE	Cav1	Caveolin-1		0.323701	-0.124648	10	10	7	47.8	47.8	37.6	20.538	0	29.587	300270000	269	23.0099	23.2227	23.6994	23.1465	23.3444	23.0215	23.3499	23.1512
P49935	CATH_MOUSE	Ctsh	Pro-cathepsin H		0	0.26214	4	4	4	17.7	17.7	17.7	37.17	0	15.555	6386800	9	NaN	NaN	21.1736	NaN	21.4357	NaN	NaN	NaN
P49962	SRP09_MOUSE	Srp9	Signal recognition particle 9 kDa protein		0	NaN	3	3	3	36	36	36	10.194	0	7.4565	7833500	9	NaN	NaN	NaN	NaN	NaN	NaN	19.7128	20.4169
Q3U3J1	Q3U3J1_MOUSE	Bckdha	2-oxoisovalerate dehydrogenase subunit alpha		0	NaN	3	3	3	12.6	12.6	12.6	50.773	0	4.5232	5939200	10	NaN	NaN	NaN	NaN	NaN	NaN	NaN	NaN
P50171	DHB8_MOUSE	Hsd17b8	Estradiol 17-beta-dehydrogenase 8		1.06846	0.338995	5	5	5	29.3	29.3	29.3	26.588	0	53.377	24732000	33	20.8467	20.5255	20.5214	20.4731	21.0291	20.3732	20.5196	20.1043
P50172	DHI1_MOUSE	Hsd11b1	Corticosteroid 11-beta-dehydrogenase isozyme 1		0.102585	0.114224	10	10	10	32.2	32.2	32.2	32.364	0	32.671	26994000	42	20.6243	20.9163	21.185	21.3177	20.1877	20.6037	19.7232	21.0773
P50247	SAHH_MOUSE	Ahcy	Adenosylhomocysteinase		0	NaN	9	9	9	23.6	23.6	23.6	47.688	0	19.539	18359000	17	NaN	NaN	NaN	NaN	NaN	20.4561	20.8485	20.4775
P50285	FMO1_MOUSE	Fmo1	Dimethylaniline monooxygenase [N-oxide-forming] 1		0.0180283	0.00993395	9	9	9	22	22	22	59.914	0	22.087	30810000	36	20.8737	21.2978	20.7569	21.0157	20.5404	20.748	21.0338	21.1491
P50295	ARY2_MOUSE	Nat2	Arylamine N-acetyltransferase 2		0	NaN	1	1	1	4.1	4.1	4.1	33.701	0	4.7771	393550	1	NaN	NaN	NaN	NaN	NaN	NaN	NaN	NaN
P50396	GDIA_MOUSE	Gdi1	Rab GDP dissociation inhibitor alpha		0	NaN	5	1	1	10.3	3.4	3.4	50.521	0.00076923	2.4111	511660	2	NaN	NaN	NaN	NaN	NaN	NaN	NaN	NaN
P50427	STS_MOUSE	Sts	Steryl-sulfatase		0	NaN	1	1	1	1.9	1.9	1.9	66.59	0	3.0633	438260	1	NaN	NaN	NaN	NaN	NaN	NaN	NaN	NaN
G3UZ26	G3UZ26_MOUSE	Shmt1	Serine hydroxymethyltransferase (Fragment)		0	NaN	2	2	2	4.8	4.8	4.8	48.334	0	5.6859	2003400	4	NaN	NaN	NaN	NaN	NaN	NaN	NaN	NaN
P50516	VATA_MOUSE	Atp6v1a	V-type proton ATPase catalytic subunit A		0.104193	-0.0393891	31	31	31	57.5	57.5	57.5	68.325	0	178.94	257350000	197	22.9233	22.8016	22.9264	22.41	22.8479	22.616	22.9124	22.6856
P50518	VATE1_MOUSE	Atp6v1e1	V-type proton ATPase subunit E 1		0.775392	-0.635934	10	10	10	44.2	44.2	44.2	26.157	0	36.804	72985000	87	21.3518	20.746	21.0725	20.1766	21.1613	21.8611	20.8729	22.1728
P50543	S10AB_MOUSE	S100a11	Protein S100-A11		0.239343	0.200077	4	4	4	23.5	23.5	23.5	11.083	0	10.453	34443000	74	20.5477	21.7035	NaN	21.4413	21.5297	20.9666	21.4313	20.9185
P50544	ACADV_MOUSE	Acadvl	Very long-chain specific acyl-CoA dehydrogenase, mitochondrial		0.115586	0.068152	22	22	22	43	43	43	70.875	0	106.09	99170000	104	21.9396	22.4276	22.3837	21.7391	22.5002	22.1458	21.8589	21.9455
P50580	PA2G4_MOUSE	Pa2g4	Proliferation-associated protein 2G4		0.952165	-0.712554	13	13	13	34.5	34.5	34.5	43.698	0	31.473	37398000	55	20.2483	20.4217	20.0313	19.6969	NaN	21.1763	20.9818	21.15
A0A140LIU9	A0A140LIU9_MOUSE	Tspo	Peripheral-type benzodiazepine receptor (Fragment)		0	0.0981242	1	1	1	13.7	13.7	13.7	11.341	0	2.8036	19964000	16	NaN	NaN	NaN	22.2336	NaN	22.1636	22.0063	22.2364
P51150	RAB7A_MOUSE	Rab7a	Ras-related protein Rab-7a		1.19393	0.196708	20	20	20	86.5	86.5	86.5	23.489	0	166.88	736440000	357	24.0922	24.1556	24.0676	24.2926	24.477	24.0265	24.1	24.0366
A0A140T8T4	A0A140T8T4_MOUSE	Rpl9-ps6	60S ribosomal protein L9		0.198384	0.168347	13	13	13	65.6	65.6	65.6	21.853	0	214.6	703230000	497	24.6628	24.9727	24.7415	25.6399	24.6826	25.1521	25.232	24.1589
P51437	CAMP_MOUSE	Camp	Cathelicidin antimicrobial peptide		0	0.668827	2	2	2	19.8	19.8	19.8	19.453	0	109.38	14046000	20	NaN	21.0954	NaN	NaN	NaN	20.6802	20.1729	NaN
P51660	DHB4_MOUSE	Hsd17b4	Peroxisomal multifunctional enzyme type 2		0.905454	0.202393	29	29	29	43.3	43.3	43.3	79.481	0	174.77	626050000	453	23.7954	24.104	23.944	24.1037	24.0747	23.5743	23.8258	23.9241
Q790S0	Q790S0_MOUSE	Clcn3	Chloride channel protein		0	-0.0819696	3	3	3	4.9	4.9	4.9	84.474	0	6.6383	11432000	14	NaN	21.0515	21.0705	NaN	NaN	NaN	21.0763	21.2535
E9Q706	E9Q706_MOUSE	Adcy9	Adenylate cyclase type 9		0	NaN	2	2	2	1.9	1.9	1.9	124.39	0.00038565	2.4649	2753700	2	NaN	NaN	NaN	NaN	NaN	NaN	NaN	NaN
P51855	GSHB_MOUSE	Gss	Glutathione synthetase		0	NaN	2	2	2	5.9	5.9	5.9	52.246	0	10.484	556690	2	NaN	NaN	NaN	NaN	NaN	NaN	NaN	NaN
P51859	HDGF_MOUSE	Hdgf	Hepatoma-derived growth factor		0.00624261	-0.00460434	5	5	5	23.6	23.6	23.6	26.268	0	11.758	10484000	16	19.1955	NaN	NaN	19.5049	NaN	19.251	19.6698	19.1436
P51863	VA0D1_MOUSE	Atp6v0d1	V-type proton ATPase subunit d 1		1.26704	0.213191	16	16	16	52.1	52.1	52.1	40.301	0	68.056	395210000	178	23.7152	23.7906	23.495	23.6744	23.9173	23.4241	23.5695	23.7563
P51881	ADT2_MOUSE	Slc25a5	ADP/ATP translocase 2		0.151116	0.0399928	42	42	25	93.6	93.6	60.4	32.931	0	222.75	10813000000	1433	28.1654	27.8022	27.8489	27.9432	28.0234	28.1254	27.8379	27.9621
P51885	LUM_MOUSE	Lum	Lumican		0	NaN	4	4	4	11.8	11.8	11.8	38.265	0	7.0322	3969200	9	NaN	NaN	NaN	NaN	NaN	NaN	NaN	NaN
P52019	ERG1_MOUSE	Sqle	Squalene monooxygenase		1.08908	-0.232994	15	15	15	35.5	35.5	35.5	63.769	0	40.941	125000000	85	22.837	22.8057	22.9989	22.4631	22.6723	22.8138	22.8015	23.0958
P52196	THTR_MOUSE	Tst	Thiosulfate sulfurtransferase		0.402344	0.112481	9	9	9	37	37	37	33.466	0	51.962	79757000	57	22.2312	21.9458	21.7687	21.8331	22.2465	22.0117	21.9477	22.0785
B1ASP2	B1ASP2_MOUSE	Jak1	Tyrosine-protein kinase		0	NaN	3	3	3	2.8	2.8	2.8	133.35	0	7.392	1150000	4	NaN	NaN	NaN	NaN	NaN	NaN	NaN	NaN
P52480	KPYM_MOUSE	Pkm	Pyruvate kinase PKM		0.143345	0.0393534	40	40	40	79.8	79.8	79.8	57.844	0	323.31	1742800000	694	24.8366	24.8697	24.7231	24.6518	25.1139	24.8385	24.9334	24.8197
P52503	NDUS6_MOUSE	Ndufs6	NADH dehydrogenase [ubiquinone] iron-sulfur protein 6, mitochondrial		1.43288	-0.567769	6	6	6	60.3	60.3	60.3	13.02	0	21.276	432710000	263	23.1112	22.9035	23.1855	23.2136	23.2721	23.8571	23.6197	24.109
P52825	CPT2_MOUSE	Cpt2	Carnitine O-palmitoyltransferase 2, mitochondrial		0.103365	0.0835571	15	15	15	23.3	23.3	23.3	73.98	0	44.623	60414000	61	21.6141	21.2739	20.8257	21.1406	21.6922	21.6174	20.9845	21.959
P52875	TM165_MOUSE	Tmem165	Transmembrane protein 165		0.171765	0.0597606	11	11	11	34.1	34.1	34.1	34.79	0	182.67	473280000	298	23.3664	23.4434	23.6432	23.3649	23.3065	23.0326	23.1842	23.3822
P53395	ODB2_MOUSE	Dbt	Lipoamide acyltransferase component of branched-chain alpha-keto acid dehydrogenase complex, mitochondrial		0.15328	-0.0603862	11	11	11	31.3	31.3	31.3	53.246	0	32.41	66240000	62	21.6575	21.3027	21.2759	21.1157	21.3091	21.5011	21.2094	21.6401
Q6PFA1	Q6PFA1_MOUSE	Rabggtb	Geranylgeranyl transferase type-2 subunit beta		0	NaN	1	1	1	8.3	8.3	8.3	14.804	0.00038865	2.5594	227110	3	NaN	NaN	NaN	NaN	NaN	NaN	NaN	NaN
G3UXK7	G3UXK7_MOUSE	Hccs	Cytochrome c-type heme lyase		0	NaN	1	1	1	14	14	14	9.5524	0	5.9113	2450900	3	NaN	NaN	NaN	NaN	NaN	NaN	NaN	NaN
P53798	FDFT_MOUSE	Fdft1	Squalene synthase		0.637401	0.376379	9	9	9	28.4	28.4	28.4	48.154	0	37.51	33447000	34	21.4568	21.4395	20.9572	21.1028	20.5179	20.2262	20.9666	20.8614
P53810	PIPNA_MOUSE	Pitpna	Phosphatidylinositol transfer protein alpha isoform		0	NaN	3	3	3	20.7	20.7	20.7	31.893	0	33.252	13521000	10	NaN	NaN	NaN	NaN	NaN	NaN	22.0551	22.9791
P53811	PIPNB_MOUSE	Pitpnb	Phosphatidylinositol transfer protein beta isoform		0	NaN	1	1	1	4.8	4.8	4.8	31.487	0	5.3426	834490	2	NaN	NaN	NaN	NaN	NaN	NaN	NaN	NaN
P53986	MOT1_MOUSE	Slc16a1	Monocarboxylate transporter 1		2.38114	-0.514338	7	7	7	14.2	14.2	14.2	53.267	0	59.91	184800000	84	23.017	22.5803	23.219	22.7978	22.5713	23.3882	23.2174	23.1991
P53994	RAB2A_MOUSE	Rab2a	Ras-related protein Rab-2A		1.25897	-0.297366	18	18	17	77.4	77.4	77.4	23.547	0	138.69	636750000	272	23.4874	23.7827	23.574	23.4331	23.5216	24.0341	23.9	23.9061
P54071	IDHP_MOUSE	Idh2	Isocitrate dehydrogenase [NADP], mitochondrial		0.195511	-0.105193	20	20	19	43.8	43.8	43.8	50.906	0	112.77	151760000	139	22.3079	21.9756	22.1126	22.0548	22.6691	22.6271	22.5832	22.1053
P54116	STOM_MOUSE	Stom	Stomatin		2.42184	1.13829	9	9	9	34.2	34.2	34.2	31.375	0	115.35	77402000	107	21.8466	22.6721	21.6318	22.6532	22.5513	20.9484	21.4458	21.1441
P54728	RD23B_MOUSE	Rad23b	UV excision repair protein RAD23 homolog B		0	NaN	2	2	2	4.3	4.3	4.3	43.512	0.0037133	1.9415	2424300	6	NaN	NaN	NaN	NaN	NaN	NaN	NaN	NaN
P54751	SIA4A_MOUSE	St3gal1	CMP-N-acetylneuraminate-beta-galactosamide-alpha-2,3-sialyltransferase 1		0.851884	-0.688589	10	10	10	32.9	32.9	32.9	39.072	0	22.426	50344000	36	20.9769	21.3737	21.4175	19.8176	NaN	21.3448	21.3572	21.5258
A0A140LIZ5	A0A140LIZ5_MOUSE	Psmc4	26S proteasome AAA-ATPase subunit RPT3		0	NaN	6	6	6	17.1	17.1	17.1	43.549	0	8.63	7596900	14	NaN	NaN	NaN	NaN	NaN	19.9535	19.2704	19.2938
E9Q242	E9Q242_MOUSE	Adsl	Adenylosuccinate lyase		0	NaN	1	1	1	2.3	2.3	2.3	53.13	0.0040786	1.9319	1266500	2	NaN	NaN	NaN	NaN	NaN	NaN	NaN	NaN
P54823	DDX6_MOUSE	Ddx6	Probable ATP-dependent RNA helicase DDX6		0	NaN	2	2	2	5.8	5.8	5.8	54.191	0.0011359	2.2044	1328000	3	NaN	NaN	NaN	NaN	NaN	NaN	NaN	NaN
P55002	MFAP2_MOUSE	Mfap2	Microfibrillar-associated protein 2		0	-0.0267096	2	2	2	10.4	10.4	10.4	20.578	0	3.1473	18984000	13	NaN	21.1892	21.0751	NaN	NaN	NaN	21.3568	NaN
P55096	ABCD3_MOUSE	Abcd3	ATP-binding cassette sub-family D member 3		1.23871	0.344175	23	23	23	35.2	35.2	35.2	75.474	0	133.62	250280000	181	23.2667	23.1733	23.0511	23.5093	23.2069	22.8892	22.6243	23.2149
P55144	TYRO3_MOUSE	Tyro3	Tyrosine-protein kinase receptor TYRO3		0	NaN	1	1	1	1.9	1.9	1.9	96.207	0.009636	1.5485	709060	2	NaN	NaN	NaN	NaN	NaN	NaN	NaN	NaN
P55258	RAB8A_MOUSE	Rab8a	Ras-related protein Rab-8A		0.366122	-0.111003	11	9	7	43.5	38.2	30.9	23.668	0	36.955	58707000	102	20.9232	21.2343	20.994	21.3541	21.0797	21.3366	21.4164	21.2883
P55264	ADK_MOUSE	Adk	Adenosine kinase		0	NaN	8	8	8	31.6	31.6	31.6	40.148	0	22.65	25463000	24	NaN	NaN	NaN	NaN	NaN	NaN	NaN	NaN
P55302	AMRP_MOUSE	Lrpap1	Alpha-2-macroglobulin receptor-associated protein		0.365589	0.128685	18	18	18	48.1	48.1	48.1	42.215	0	49.802	136130000	134	22.3999	22.1045	21.8565	22.1152	21.7386	22.1568	21.9651	21.865
P55821	STMN2_MOUSE	Stmn2	Stathmin-2		0	NaN	2	2	2	10.6	10.6	10.6	20.828	0	2.9635	781660	4	NaN	NaN	NaN	NaN	NaN	NaN	NaN	NaN
A0A0R4J1H6	A0A0R4J1H6_MOUSE	Golga3	Golgin subfamily A member 3		0	NaN	3	3	3	2.5	2.5	2.5	162.89	0	5.4455	21645000	3	NaN	NaN	NaN	NaN	NaN	NaN	NaN	NaN
P56135	ATPK_MOUSE	Atp5mf	ATP synthase subunit f, mitochondrial		1.38554	0.234968	6	6	6	48.9	48.9	48.9	10.344	0	16.397	957980000	145	25.872	25.8231	25.8392	25.9987	25.9678	25.7357	25.4563	25.6905
E9Q4B9	E9Q4B9_MOUSE	Arpp19	cAMP-regulated phosphoprotein 19		0	NaN	1	1	1	19.7	19.7	19.7	7.6566	0	4.1044	1776800	4	NaN	NaN	NaN	NaN	NaN	NaN	NaN	NaN
P56213	ALR_MOUSE	Gfer	FAD-linked sulfhydryl oxidase ALR		0.465153	0.29403	8	8	8	43.4	43.4	43.4	22.876	0	24.518	31138000	59	21.5633	21.2261	21.499	20.8761	20.9909	20.6195	20.9737	20.3881
P56371	RAB4A_MOUSE	Rab4a	Ras-related protein Rab-4A		1.38602	-0.638311	6	6	4	33.9	33.9	21.1	24.408	0	16.171	28316000	33	20.6883	20.0609	20.522	20.1444	20.4529	20.7706	21.218	21.3893
P56375	ACYP2_MOUSE	Acyp2	Acylphosphatase-2		0	NaN	1	1	1	12.3	12.3	12.3	11.877	0	5.7736	490830	3	NaN	NaN	NaN	NaN	NaN	NaN	NaN	NaN
P56379	ATP68_MOUSE	Atp5mpl	ATP synthase subunit ATP5MPL, mitochondrial		1.37683	-0.905027	3	3	3	34.5	34.5	34.5	6.6979	0	8.0603	265210000	231	23.7397	23.0003	23.3981	23.3362	22.9702	24.8676	24.2692	24.1317
P56380	AP4A_MOUSE	Nudt2	Bis(5-nucleosyl)-tetraphosphatase [asymmetrical]		0	NaN	1	1	1	10.2	10.2	10.2	16.989	0.0011368	2.2147	311680	1	NaN	NaN	NaN	NaN	NaN	NaN	NaN	NaN
P56382	ATP5E_MOUSE	Atp5f1e	ATP synthase subunit epsilon, mitochondrial		0.251265	0.115789	4	4	4	50	50	50	5.8378	0	5.0148	388940000	103	24.2672	24.1344	24.036	23.6576	24.2151	24.2707	23.7219	23.7826
P56389	CDD_MOUSE	Cda	Cytidine deaminase		0	NaN	1	1	1	11	11	11	16.131	0	3.5312	5638400	6	NaN	NaN	NaN	NaN	NaN	NaN	NaN	NaN
P56391	CX6B1_MOUSE	Cox6b1	Cytochrome c oxidase subunit 6B1		0.0260035	-0.0100236	12	12	12	83.7	83.7	83.7	10.071	0	40.803	1920200000	565	26.31	25.9618	26.2128	26.13	26.1939	26.2935	25.8339	26.2956
P56392	CX7A1_MOUSE	Cox7a1	Cytochrome c oxidase subunit 7A1, mitochondrial		0	NaN	1	1	1	16.2	16.2	16.2	8.9863	0	6.1874	14536000	9	NaN	NaN	NaN	NaN	NaN	NaN	NaN	NaN
P56394	COX17_MOUSE	Cox17	Cytochrome c oxidase copper chaperone		0	NaN	1	1	1	25.4	25.4	25.4	6.784	0	3.0555	548520	1	NaN	NaN	NaN	NaN	NaN	NaN	NaN	NaN
G5E850	G5E850_MOUSE	Cyb5a	Cytochrome b5		2.33425	-0.401858	8	8	8	76.5	76.5	76.5	11.142	0	81.193	877650000	181	24.4653	24.557	24.7854	24.4914	24.2624	24.8173	25.0384	24.7425
Q3U4W8	Q3U4W8_MOUSE	Usp5	Ubiquitin carboxyl-terminal hydrolase		0	NaN	3	3	3	3.8	3.8	3.8	93.354	0	5.1828	4401600	9	NaN	NaN	NaN	NaN	NaN	18.8715	18.3423	18.8242
P56480	ATPB_MOUSE	Atp5f1b	ATP synthase subunit beta, mitochondrial		0.240032	-0.0730648	35	35	35	80.3	80.3	80.3	56.3	0	323.31	18127000000	2804	28.0396	27.8116	28.3102	27.9577	28.0446	28.0228	27.768	28.0448
P56501	UCP3_MOUSE	Ucp3	Mitochondrial uncoupling protein 3		0.208676	0.159395	8	8	8	29.9	29.9	29.9	33.91	0	25.118	15504000	17	20.9915	NaN	NaN	20.762	20.5312	20.3784	20.2996	21.1286
P56564	EAA1_MOUSE	Slc1a3	Excitatory amino acid transporter 1		0	NaN	2	2	2	5.5	5.5	5.5	59.622	0	6.5223	2369700	12	NaN	NaN	NaN	NaN	NaN	NaN	NaN	NaN
Q91V77	Q91V77_MOUSE	S100a1	Protein S100		0	NaN	1	1	1	16	16	16	10.505	0	5.1102	422360	3	NaN	NaN	NaN	NaN	NaN	NaN	NaN	NaN
P56677	ST14_MOUSE	St14	Suppressor of tumorigenicity 14 protein homolog		0.30917	-0.182613	19	19	19	29.7	29.7	29.7	94.654	0	64.373	126320000	98	22.5539	22.7678	22.9824	22.4203	22.9377	22.4892	23.422	22.5166
P56695	WFS1_MOUSE	Wfs1	Wolframin		1.06642	-0.419954	16	16	16	22.4	22.4	22.4	100.58	0	64.058	66600000	109	20.4248	20.5173	20.3738	20.4846	19.8366	20.8208	20.7888	20.9597
P56812	PDCD5_MOUSE	Pdcd5	Programmed cell death protein 5		0	NaN	1	1	1	7.9	7.9	7.9	14.275	0	3.3957	2879000	9	NaN	NaN	NaN	NaN	NaN	NaN	NaN	NaN
P57016	LAD1_MOUSE	Lad1	Ladinin-1		0	NaN	1	1	1	2.1	2.1	2.1	58.863	0	3.7005	889260	4	NaN	NaN	NaN	NaN	NaN	NaN	NaN	NaN
P57716	NICA_MOUSE	Ncstn	Nicastrin		0.0701672	0.0414281	7	7	7	11.3	11.3	11.3	78.491	0	29.913	38487000	55	21.4505	20.6027	20.9385	20.9071	21.3685	21.0973	21.2073	20.92
P57746	VATD_MOUSE	Atp6v1d	V-type proton ATPase subunit D		0.559673	0.212676	6	6	6	33.6	33.6	33.6	28.369	0	86.657	30058000	30	21.4367	21.0626	20.8592	20.7243	21.4106	20.8507	21.0895	20.9841
P57759	ERP29_MOUSE	Erp29	Endoplasmic reticulum resident protein 29		0.744653	0.210471	15	15	15	42.4	42.4	42.4	28.823	0	69.365	270550000	137	23.3606	23.231	23.4624	23.2703	23.4041	22.8206	23.0918	23.0494
Q80T06	Q80T06_MOUSE	Eef1d	Elongation factor 1-delta		2.35659	-0.328186	13	13	2	60.1	60.1	12.1	31.292	0	65.128	232360000	118	22.5446	22.4301	22.6439	22.4353	22.2933	22.7814	22.7014	22.8893
P57780	ACTN4_MOUSE	Actn4	Alpha-actinin-4		1.08377	-0.114318	66	66	42	76.1	76.1	51.9	104.98	0	323.31	1368000000	784	23.7608	23.6959	23.776	23.7409	23.8801	23.8846	23.9494	23.925
P58021	TM9S2_MOUSE	Tm9sf2	Transmembrane 9 superfamily member 2		0.815805	-0.202369	16	16	16	24.6	24.6	24.6	75.329	0	193.71	627620000	388	23.2661	23.1746	23.6351	23.1837	23.5574	23.2607	23.6063	23.4893
P58044	IDI1_MOUSE	Idi1	Isopentenyl-diphosphate Delta-isomerase 1		0	NaN	1	1	1	4.8	4.8	4.8	26.289	0.0011346	2.1794	2709700	3	NaN	NaN	NaN	NaN	NaN	NaN	NaN	NaN
P58064	RT06_MOUSE	Mrps6	28S ribosomal protein S6, mitochondrial		0	0.279552	2	2	2	18.4	18.4	18.4	14.308	0	5.3836	5800400	14	NaN	NaN	18.6811	NaN	18.9606	NaN	NaN	NaN
P58137	ACOT8_MOUSE	Acot8	Acyl-coenzyme A thioesterase 8		0	0.15142	2	2	2	10.6	10.6	10.6	35.827	0	7.6272	22041000	18	20.8045	20.542	20.4885	20.6349	20.5781	NaN	NaN	NaN
P58158	B3GA3_MOUSE	B3gat3	Galactosylgalactosylxylosylprotein 3-beta-glucuronosyltransferase 3		0	NaN	2	2	2	6	6	6	37.066	0	2.6795	2385100	6	NaN	NaN	NaN	NaN	NaN	NaN	NaN	NaN
P58252	EF2_MOUSE	Eef2	Elongation factor 2		0.464931	0.0953703	54	54	53	59.1	59.1	57.9	95.313	0	313.42	1314700000	761	24.4727	24.6481	24.6643	24.4749	24.6716	24.3317	24.5154	24.3745
H7BX01	H7BX01_MOUSE	Opa1	Dynamin-like 120 kDa protein, form S1		0.706484	0.219387	30	30	25	31.6	31.6	25.5	113.23	0	98.685	134320000	192	21.0769	21.5182	21.4323	21.2374	21.3684	20.9855	20.9188	20.9866
P58404	STRN4_MOUSE	Strn4	Striatin-4		0	NaN	5	3	3	6.3	4.9	4.9	81.644	0	4.6397	702330	3	NaN	NaN	NaN	NaN	NaN	NaN	NaN	NaN
A0A2R8VI59	A0A2R8VI59_MOUSE	Aaas	Aladin (Fragment)		0	NaN	1	1	1	20	20	20	6.0828	0.004068	1.9131	508640	1	NaN	NaN	NaN	NaN	NaN	NaN	NaN	NaN
A0A571BEG9	A0A571BEG9_MOUSE	Tnks1bp1	182 kDa tankyrase-1-binding protein (Fragment)		0	NaN	1	1	1	4	4	4	30.156	0.0096844	1.5949	0	1	NaN	NaN	NaN	NaN	NaN	NaN	NaN	NaN
P59017	B2L13_MOUSE	Bcl2l13	Bcl-2-like protein 13		0.199989	-0.0472836	6	6	6	22.1	22.1	22.1	46.719	0	56.142	68208000	61	21.2775	21.4415	21.3712	21.3505	21.0451	21.3967	21.219	21.3168
P59266	FITM2_MOUSE	Fitm2	Fat storage-inducing transmembrane protein 2		0	-0.170178	4	4	4	17.9	17.9	17.9	30.016	0	8.3909	17167000	17	21.5436	NaN	21.6448	21.4056	NaN	NaN	NaN	NaN
P59268	ZDHC9_MOUSE	Zdhhc9	Palmitoyltransferase ZDHHC9		0	NaN	1	1	1	3.6	3.6	3.6	40.939	0.0015089	2.1134	524630	2	NaN	NaN	NaN	NaN	NaN	NaN	NaN	NaN
Q8BVV6	Q8BVV6_MOUSE	Eif5	Eukaryotic translation initiation factor 5		0	-0.0271416	2	2	2	5.6	5.6	5.6	42.586	0	3.6644	4333300	10	18.9123	NaN	NaN	NaN	NaN	NaN	18.9395	NaN
F6QN75	F6QN75_MOUSE	Lman2l	VIP36-like protein (Fragment)		0	NaN	2	2	2	25	25	25	14.273	0	3.2716	8878500	6	NaN	NaN	NaN	NaN	NaN	NaN	NaN	NaN
P59999	ARPC4_MOUSE	Arpc4	Actin-related protein 2/3 complex subunit 4		0.472452	-0.16324	5	5	5	29.8	29.8	29.8	19.667	0	13.42	90294000	44	22.4226	22.3882	22.278	22.2089	22.3762	22.365	22.9449	22.461
P60060	SC61G_MOUSE	Sec61g	Protein transport protein Sec61 subunit gamma		0.00613509	-0.0089221	2	2	2	36.8	36.8	36.8	7.7412	0	6.7855	77659000	41	23.0595	22.3477	22.7996	23.0224	23.2057	23.7131	21.7046	23.4536
P60229	EIF3E_MOUSE	Eif3e	Eukaryotic translation initiation factor 3 subunit E		0	NaN	2	2	2	4.7	4.7	4.7	52.22	0	6.6719	5385000	7	NaN	NaN	19.0459	NaN	NaN	NaN	NaN	19.4019
P60335	PCBP1_MOUSE	Pcbp1	Poly(rC)-binding protein 1		1.3934	0.2504	6	6	5	20.8	20.8	17.7	37.497	0	26.389	74633000	61	22.2579	22.2652	22.0946	22.5419	22.195	21.9958	22.2123	21.9557
A0A1B0GRM4	A0A1B0GRM4_MOUSE	Ppfia3	Liprin-alpha-3 (Fragment)		0	NaN	1	1	1	1	1	1	115.16	0.0040665	1.9086	5838800	4	NaN	NaN	NaN	NaN	NaN	NaN	NaN	NaN
P60521	GBRL2_MOUSE	Gabarapl2	Gamma-aminobutyric acid receptor-associated protein-like 2		0	NaN	1	1	1	9.4	9.4	9.4	13.667	0	2.6388	576550	1	NaN	NaN	NaN	NaN	NaN	NaN	NaN	NaN
P60670	NPL4_MOUSE	Nploc4	Nuclear protein localization protein 4 homolog		0	NaN	2	2	2	4.3	4.3	4.3	68.016	0.0079394	1.6448	9543800	3	NaN	NaN	NaN	NaN	NaN	NaN	NaN	NaN
P60710	ACTB_MOUSE	Actb	Actin, cytoplasmic 1		0.799501	-0.898404	33	1	1	79.7	4.5	4.5	41.736	0	119.11	171180000	71	23.4117	22.5998	23.1961	21.4027	NaN	23.8387	22.9163	23.5281
P60766	CDC42_MOUSE	Cdc42	Cell division control protein 42 homolog		0.790124	0.173993	10	10	9	59.7	59.7	53.9	21.258	0	52.382	331670000	187	23.3733	23.7656	23.4427	23.7104	23.454	23.3476	23.2894	23.5277
P60843	IF4A1_MOUSE	Eif4a1	Eukaryotic initiation factor 4A-I		0.7692	0.13731	22	22	11	57.4	57.4	30.8	46.153	0	122.08	279500000	201	23.8241	23.5412	23.6305	23.7736	23.7297	23.4048	23.699	23.5851
P60867	RS20_MOUSE	Rps20	40S ribosomal protein S20		0.230339	-0.166951	10	10	10	52.9	52.9	52.9	13.373	0	37.767	2547100000	478	25.7349	25.7209	25.0583	25.4913	25.6708	26.412	25.766	26.0493
P60904	DNJC5_MOUSE	Dnajc5	DnaJ homolog subfamily C member 5		0	NaN	5	5	5	32.8	32.8	32.8	22.101	0	8.398	7985300	11	NaN	NaN	NaN	NaN	NaN	NaN	NaN	NaN
P61021	RAB5B_MOUSE	Rab5b	Ras-related protein Rab-5B		1.83285	-0.369982	6	3	3	35.8	20.9	20.9	23.707	0	12.308	21712000	48	20.746	20.6261	21.0584	NaN	NaN	20.9243	21.0491	21.1923
P61022	CHP1_MOUSE	Chp1	Calcineurin B homologous protein 1		2.01242	-0.439311	17	17	17	71.8	71.8	71.8	22.432	0	171.98	224830000	182	22.251	22.4694	22.6596	21.9989	22.3102	22.5976	22.8898	22.6398
P61027	RAB10_MOUSE	Rab10	Ras-related protein Rab-10		1.30746	0.68158	10	9	8	45.5	40	36.5	22.541	0	18.752	175450000	142	23.9312	24.0815	24.1964	24.3796	24.5861	23.2041	23.6443	23.2072
A0A494BAN1	A0A494BAN1_MOUSE	Ube2d2a	Ubiquitin-conjugating enzyme E2D 2A (Fragment)		0.768806	-0.994034	2	2	2	31.5	31.5	31.5	10.508	0	6.1835	20338000	11	20.0935	NaN	NaN	NaN	21.3916	22.1262	21.6686	21.415
A0A0J9YUI1	A0A0J9YUI1_MOUSE	Ube2k	Ubiquitin-conjugating enzyme E2 K		0	NaN	2	2	2	15.8	15.8	15.8	15.81	0	3.3673	2416900	3	NaN	NaN	NaN	NaN	NaN	NaN	NaN	NaN
P61089	UBE2N_MOUSE	Ube2n	Ubiquitin-conjugating enzyme E2 N		0.00967939	0.0038991	5	5	5	37.5	37.5	37.5	17.138	0	11.265	35424000	23	21.5822	21.3339	21.2504	NaN	NaN	21.4965	21.4771	21.5925
P61161	ARP2_MOUSE	Actr2	Actin-related protein 2		0.625457	0.270589	9	9	9	26.9	26.9	26.9	44.76	0	70.247	74816000	68	21.2133	21.1407	21.2843	21.1057	21.4101	20.5243	21.27	20.7089
A0A494BB86	A0A494BB86_MOUSE	Actr1a	Alpha-centractin		0	NaN	4	4	4	16	16	16	37.669	0	9.2371	12749000	11	NaN	NaN	19.4958	NaN	NaN	NaN	20.1144	19.9066
P61211	ARL1_MOUSE	Arl1	ADP-ribosylation factor-like protein 1		0	NaN	6	6	6	39.2	39.2	39.2	20.411	0	18.763	16028000	16	NaN	NaN	NaN	NaN	NaN	NaN	NaN	NaN
P61222	ABCE1_MOUSE	Abce1	ATP-binding cassette sub-family E member 1		0	NaN	7	7	7	11.7	11.7	11.7	67.314	0	15.223	7455900	15	19.6541	NaN	NaN	19.3938	19.4997	NaN	NaN	NaN
P61255	RL26_MOUSE	Rpl26	60S ribosomal protein L26		0.0816618	0.0516043	17	17	16	62.1	62.1	57.9	17.258	0	36.026	910550000	355	25.5706	26.1118	25.8365	26.2766	25.6165	26.1144	25.9734	25.4446
G3UZW7	G3UZW7_MOUSE	Magohb	Protein mago nashi homolog 2		0	NaN	1	1	1	9.8	9.8	9.8	11.799	0.0096463	1.552	869540	1	NaN	NaN	NaN	NaN	NaN	NaN	NaN	NaN
P61358	RL27_MOUSE	Rpl27	60S ribosomal protein L27		0.715288	-0.45894	9	9	9	55.1	55.1	55.1	15.798	0	24.471	2068500000	441	25.8395	25.7701	25.3783	25.8984	25.8213	26.5512	26.7776	26.4579
P61514	RL37A_MOUSE	Rpl37a	60S ribosomal protein L37a		0.839482	-0.220487	7	7	7	59.8	59.8	59.8	10.275	0	78.997	1055600000	423	25.3366	25.4512	25.5949	25.8691	25.5016	25.7566	25.785	25.904
P61620	S61A1_MOUSE	Sec61a1	Protein transport protein Sec61 subunit alpha isoform 1		0.11019	0.0423365	18	18	10	38.4	38.4	23.9	52.264	0	203.08	3051200000	628	27.1525	27.0776	27.4229	27.1448	27.4417	27.1173	26.866	27.241
P61750	ARF4_MOUSE	Arf4	ADP-ribosylation factor 4		0.885706	-0.20744	9	3	3	57.2	19.4	19.4	20.396	0	7.1974	78846000	48	22.3358	22.3932	22.3264	22.0958	22.0451	22.4818	22.2657	22.6257
P61804	DAD1_MOUSE	Dad1	Dolichyl-diphosphooligosaccharide--protein glycosyltransferase subunit DAD1		0.57908	0.253345	4	4	4	35.4	35.4	35.4	12.497	0	13.724	294520000	77	24.359	24.4557	24.4074	24.2539	23.8618	23.9396	23.6395	23.9306
P61924	COPZ1_MOUSE	Copz1	Coatomer subunit zeta-1		0	NaN	2	2	2	18.6	18.6	18.6	20.198	0	13.702	9379700	8	NaN	NaN	NaN	NaN	NaN	NaN	NaN	NaN
G3UZX6	G3UZX6_MOUSE	Sumo3	Small ubiquitin-related modifier 3 (Fragment)		0	NaN	1	1	1	25.5	25.5	25.5	5.2631	0	5.2554	20143000	8	NaN	NaN	NaN	NaN	NaN	NaN	NaN	NaN
P61961	UFM1_MOUSE	Ufm1	Ubiquitin-fold modifier 1		0	NaN	4	4	4	72.9	72.9	72.9	9.1175	0	17.88	46301000	17	NaN	NaN	NaN	NaN	NaN	22.7619	23.1533	22.9913
P61967	AP1S1_MOUSE	Ap1s1	AP-1 complex subunit sigma-1A		0	NaN	2	2	2	15.8	15.8	15.8	18.733	0	37.907	15060000	23	NaN	NaN	NaN	NaN	NaN	NaN	NaN	NaN
B2M1R6	B2M1R6_MOUSE	Hnrnpk	Heterogeneous nuclear ribonucleoprotein K		0.14167	-0.0292994	9	9	9	27.3	27.3	27.3	48.562	0	25.558	20485000	33	20.4245	20.6613	20.6576	20.6902	NaN	20.5839	20.5646	20.6791
P61982	1433G_MOUSE	Ywhag	14-3-3 protein gamma		0.163621	-0.0665131	13	9	7	51	39.7	33.2	28.302	0	118.39	134210000	107	22.1794	22.1647	21.8584	22.1805	22.1414	22.2934	22.1659	22.6142
P62071	RRAS2_MOUSE	Rras2	Ras-related protein R-Ras2		1.23834	0.771927	5	3	3	32.4	19.1	19.1	23.399	0	10.567	10862000	14	NaN	19.9958	19.7468	NaN	20.4335	19.3364	NaN	19.2449
P62073	TIM10_MOUSE	Timm10	Mitochondrial import inner membrane translocase subunit Tim10		0.46753	-0.178243	5	5	5	48.9	48.9	48.9	10.333	0	9.8834	21358000	22	20.8118	NaN	NaN	20.7511	NaN	NaN	20.8192	21.1002
P62075	TIM13_MOUSE	Timm13	Mitochondrial import inner membrane translocase subunit Tim13		0.0211945	0.0165849	5	5	5	53.7	53.7	53.7	10.458	0	33.493	73540000	49	23.2065	23.2156	23.6253	22.59	23.2326	22.8326	23.089	22.6315
P62077	TIM8B_MOUSE	Timm8b	Mitochondrial import inner membrane translocase subunit Tim8 B		0.575165	-0.19795	5	5	5	60.2	60.2	60.2	9.2864	0	23.589	27965000	40	21.0513	21.4248	21.3859	20.9703	21.3782	21.6681	21.4475	21.1149
P62082	RS7_MOUSE	Rps7	40S ribosomal protein S7		0.0492433	0.0239129	21	21	21	71.1	71.1	71.1	22.127	0	132.77	3563100000	665	27.6908	27.8497	27.5295	28.0312	28.0884	28.1259	28.1206	27.7885
P62137	PP1A_MOUSE	Ppp1ca	Serine/threonine-protein phosphatase PP1-alpha catalytic subunit		0.170283	-0.081172	11	11	5	45.2	45.2	19.4	37.54	0	69.016	47400000	50	21.3322	21.0946	20.8661	21.1012	21.0457	21.249	21.0958	21.6874
P62141	PP1B_MOUSE	Ppp1cb	Serine/threonine-protein phosphatase PP1-beta catalytic subunit		0	NaN	11	6	5	45	23.2	19.9	37.186	0	15.034	10380000	9	NaN	NaN	NaN	NaN	NaN	20.1	NaN	20.7312
P62192	PRS4_MOUSE	Psmc1	26S proteasome regulatory subunit 4		0	0.244307	7	7	7	19.5	19.5	19.5	49.184	0	38.699	19458000	24	NaN	20.4134	19.3487	NaN	NaN	NaN	20.4274	20.7312
Q8K1K2	Q8K1K2_MOUSE	Psmc5	26S proteasome regulatory subunit 8		0	0.222178	5	5	5	20.4	20.4	20.4	38.751	0	14.232	5457500	17	NaN	NaN	NaN	18.3039	NaN	NaN	18.0818	NaN
P62242	RS8_MOUSE	Rps8	40S ribosomal protein S8		0.189737	-0.0598445	23	23	23	63	63	63	24.205	0	245.46	5441200000	893	26.8596	26.506	26.504	26.7591	26.6274	26.9631	26.7052	26.8192
P62245	RS15A_MOUSE	Rps15a	40S ribosomal protein S15a		1.92766	0.172502	15	15	15	76.9	76.9	76.9	14.839	0	48.635	1983700000	690	26.6108	26.7089	26.478	26.7343	26.5793	26.4693	26.5707	26.4252
P62259	1433E_MOUSE	Ywhae	14-3-3 protein epsilon		0.288482	-0.0522957	18	15	15	71	63.9	63.9	29.174	0	120.09	285800000	146	24.1502	23.9636	23.9808	23.9267	24.0491	23.988	24.2205	24.1095
P62264	RS14_MOUSE	Rps14	40S ribosomal protein S14		0.978539	-0.0762582	13	13	13	70.2	70.2	70.2	16.273	0	125.19	2321400000	527	25.3846	25.4301	25.5276	25.5357	25.434	25.5678	25.5393	25.4547
P62267	RS23_MOUSE	Rps23	40S ribosomal protein S23		0.169513	-0.145198	8	8	8	49.7	49.7	49.7	15.807	0	47.462	1195200000	395	25.4684	25.7028	25.6218	26.5239	26.4014	26.6298	26.2064	26.2192
F6YVP7	F6YVP7_MOUSE	Rps18-ps6	40S ribosomal protein S18		0.707119	0.145554	21	21	21	65.1	65.1	65.1	17.671	0	84.478	3204400000	1048	26.6573	26.5825	26.2459	26.7657	26.4674	26.496	26.5615	26.5873
P62274	RS29_MOUSE	Rps29	40S ribosomal protein S29		0.882179	-0.412988	4	4	4	48.2	48.2	48.2	6.6767	0	12.571	248340000	456	23.1458	22.773	22.9649	23.0229	23.3504	23.9325	23.6279	23.4188
P62281	RS11_MOUSE	Rps11	40S ribosomal protein S11		0.445553	-0.124354	20	20	20	69.6	69.6	69.6	18.431	0	86.033	3400100000	878	26.0508	26.0329	25.9111	26.1838	26.0167	26.4711	26.1183	26.2812
P62301	RS13_MOUSE	Rps13	40S ribosomal protein S13		0.0836104	0.0393891	15	15	15	60.3	60.3	60.3	17.222	0	55.183	2321000000	418	25.7653	26.1094	25.6649	25.9184	26.3402	26.2058	26.0113	26.0938
P62317	SMD2_MOUSE	Snrpd2	Small nuclear ribonucleoprotein Sm D2		0	NaN	1	1	1	8.5	8.5	8.5	13.527	0	2.878	1211400	1	NaN	NaN	NaN	NaN	NaN	NaN	NaN	NaN
P62331	ARF6_MOUSE	Arf6	ADP-ribosylation factor 6		0	NaN	2	2	2	12.6	12.6	12.6	20.082	0	4.5788	3638100	8	NaN	NaN	NaN	NaN	NaN	NaN	NaN	NaN
P62334	PRS10_MOUSE	Psmc6	26S proteasome regulatory subunit 10B		0	NaN	8	8	8	26	26	26	44.172	0	15.84	15203000	12	NaN	NaN	NaN	NaN	NaN	20.5485	NaN	20.4781
P62342	SELT_MOUSE	Selenot	Thioredoxin reductase-like selenoprotein T		0	NaN	4	4	4	23.6	23.6	23.6	22.292	0	6.7539	4707100	5	NaN	NaN	NaN	NaN	NaN	NaN	NaN	NaN
P62627	DLRB1_MOUSE	Dynlrb1	Dynein light chain roadblock-type 1		0	NaN	4	4	4	38.5	38.5	38.5	10.99	0	17.035	7450300	11	NaN	NaN	NaN	NaN	NaN	19.6457	19.3901	19.887
P62702	RS4X_MOUSE	Rps4x	40S ribosomal protein S4, X isoform		1.14238	-0.217577	29	29	29	70.7	70.7	70.7	29.597	0	211.75	5348000000	1476	26.9116	26.7888	26.854	26.9453	26.8841	27.2844	27.0618	27.1999
P63330	PP2AA_MOUSE	Ppp2ca	Serine/threonine-protein phosphatase 2A catalytic subunit alpha isoform		0	NaN	4	4	4	18.8	18.8	18.8	35.608	0	21.475	6232900	6	NaN	NaN	NaN	NaN	NaN	NaN	NaN	NaN
P62717	RL18A_MOUSE	Rpl18a	60S ribosomal protein L18a		1.24282	-0.318079	21	21	2	68.8	68.8	9.7	20.732	0	84.838	2218800000	843	25.7944	25.9095	25.746	25.8142	25.7689	26.2375	26.3011	26.2747
P62737	ACTA_MOUSE	Acta2	Actin, aortic smooth muscle		0	NaN	31	2	2	82.8	8	8	42.009	0	6.0872	60904000	17	NaN	NaN	NaN	NaN	NaN	NaN	NaN	NaN
P62743	AP2S1_MOUSE	Ap2s1	AP-2 complex subunit sigma		0	NaN	3	3	3	19	19	19	17.018	0	6.1379	26248000	14	NaN	NaN	NaN	NaN	NaN	22.3499	22.3248	21.821
P62746	RHOB_MOUSE	Rhob	Rho-related GTP-binding protein RhoB		0	NaN	4	2	2	27	13.8	13.8	22.123	0	4.967	1935200	3	NaN	NaN	NaN	NaN	NaN	NaN	NaN	NaN
P62748	HPCL1_MOUSE	Hpcal1	Hippocalcin-like protein 1		0	NaN	2	2	2	9.3	9.3	9.3	22.338	0.0003876	2.5297	1040200	3	NaN	NaN	NaN	NaN	NaN	NaN	NaN	NaN
P62751	RL23A_MOUSE	Rpl23a	60S ribosomal protein L23a		0.393246	-0.367888	16	16	16	51.3	51.3	51.3	17.695	0	68.722	978760000	255	23.997	25.0427	24.7708	25.2693	24.3519	25.08	25.8015	24.4802
P62754	RS6_MOUSE	Rps6	40S ribosomal protein S6		0.59088	-0.173511	19	19	19	47.8	47.8	47.8	28.68	0	201.03	2333100000	510	26.2928	25.9842	26.0205	26.2817	25.9788	26.533	26.3618	26.3162
P62774	MTPN_MOUSE	Mtpn	Myotrophin		0.0983625	-0.088946	2	2	2	16.9	16.9	16.9	12.861	0	32.481	18412000	16	20.3857	20.4933	20.5982	NaN	19.8653	NaN	20.0759	NaN
P62806	H4_MOUSE	H4c1	Histone H4		0.820414	-0.313508	11	11	11	64.1	64.1	64.1	11.367	0	45.76	311500000	233	22.6839	23.2045	23.0487	22.3844	22.9589	23.2388	22.9555	23.2428
M0QWG9	M0QWG9_MOUSE	Wfdc18	WAP four-disulfide core domain protein 18 (Fragment)		0.0607903	0.0957284	3	3	3	47.9	47.9	47.9	7.5278	0	10.265	57664000	67	20.5984	22.4854	21.9333	22.1627	22.3626	21.4623	22.7077	21.123
P62814	VATB2_MOUSE	Atp6v1b2	V-type proton ATPase subunit B, brain isoform		0.0559718	0.0298152	24	24	24	46.4	46.4	46.4	56.55	0	151.78	242910000	158	23.0366	22.9925	23.17	22.5186	23	22.4984	22.9629	22.7971
P62821	RAB1A_MOUSE	Rab1A	Ras-related protein Rab-1A		0	0.146525	24	1	1	84.9	5.9	5.9	22.677	0	5.6273	14461000	9	20.4162	NaN	NaN	NaN	NaN	20.4444	NaN	20.0949
P62827	RAN_MOUSE	Ran	GTP-binding nuclear protein Ran		0	0.298815	7	7	7	41.2	41.2	41.2	24.423	0	22.966	33147000	22	NaN	21.9014	21.4917	NaN	NaN	21.2741	22.1071	21.5375
P62830	RL23_MOUSE	Rpl23	60S ribosomal protein L23		0.324851	0.388635	10	10	10	75	75	75	14.865	0	55.818	474990000	232	24.1204	25.6906	24.6228	26.0252	24.8242	24.8941	25.441	24.1479
P62835	RAP1A_MOUSE	Rap1a	Ras-related protein Rap-1A		0.80442	-0.558052	12	2	2	52.2	14.1	14.1	20.987	0	11.49	17669000	16	20.7822	20.3748	21.0775	NaN	21.0422	NaN	NaN	21.5047
P62843	RS15_MOUSE	Rps15	40S ribosomal protein S15		0.955164	0.422048	8	8	8	72.4	72.4	72.4	17.04	0	80.451	1067100000	490	25.8346	26.1716	26.2155	26.6878	26.389	25.7435	25.5691	25.8667
P62849	RS24_MOUSE	Rps24	40S ribosomal protein S24		1.61179	0.422225	7	7	7	43.6	43.6	43.6	15.423	0	41.081	1091800000	323	27.095	27.1061	27.047	27.1504	27.4673	26.5275	26.8526	26.7028
A0A1L1SQA8	A0A1L1SQA8_MOUSE	Rps25	40S ribosomal protein S25		0.844489	0.183195	8	8	8	59.1	59.1	59.1	10.309	0	28.572	2242100000	370	26.794	26.6497	26.3427	26.6204	26.8455	26.5173	26.5195	26.7974
P62855	RS26_MOUSE	Rps26	40S ribosomal protein S26		0.734239	-0.450358	5	5	5	37.4	37.4	37.4	13.015	0	35.736	1620800000	323	24.9851	24.9715	24.7666	25.2813	25.1678	26.0248	25.959	25.4567
G3UYV7	G3UYV7_MOUSE	Rps28	40S ribosomal protein S28 (Fragment)		0.700177	-0.610418	9	9	9	82.1	82.1	82.1	6.3442	0	84.361	1518200000	567	24.7203	24.4147	23.9933	24.6886	24.6922	25.6098	25.7659	25.5884
P62862	RS30_MOUSE	Fau	40S ribosomal protein S30		0.191936	0.103728	3	3	3	20.3	20.3	20.3	6.6478	0	8.9286	471960000	76	26.7236	26.5875	26.1324	26.4279	26.6752	26.4501	27.0736	26.3433
P62869	ELOB_MOUSE	Elob	Elongin-B		0	NaN	3	3	3	36.4	36.4	36.4	13.17	0	12.647	13597000	13	NaN	NaN	NaN	NaN	NaN	21.7435	21.4936	21.5985
P62874	GBB1_MOUSE	Gnb1	Guanine nucleotide-binding protein G(I)/G(S)/G(T) subunit beta-1		1.74188	0.303793	16	9	9	62.1	40.9	40.9	37.377	0	197.5	164990000	97	22.4657	22.4202	22.3216	22.6509	22.5363	22.0648	22.3801	22.0915
P62880	GBB2_MOUSE	Gnb2	Guanine nucleotide-binding protein G(I)/G(S)/G(T) subunit beta-2		0.228448	0.0954137	17	17	7	62.4	62.4	37.4	37.331	0	134.12	438990000	271	22.868	23.1973	23.4054	23.4853	23.3584	22.9117	23.0856	23.1246
P62889	RL30_MOUSE	Rpl30	60S ribosomal protein L30		1.60789	-0.305449	13	13	13	79.1	79.1	79.1	12.784	0	100.7	2914000000	640	26.3643	26.1695	26.2857	26.2703	26.1693	26.6611	26.6818	26.5666
P62892	RL39_MOUSE	Rpl39	60S ribosomal protein L39		1.04495	-0.937654	1	1	1	19.6	19.6	19.6	6.4066	0.00076746	2.3934	137700000	31	23.4687	NaN	23.7136	23.713	NaN	24.899	24.657	24.8446
P62897	CYC_MOUSE	Cycs	Cytochrome c, somatic		1.20508	-0.27051	14	14	14	65.7	65.7	65.7	11.605	0	208.81	481340000	287	23.6398	23.7312	23.8701	23.2871	23.5132	23.6098	23.8583	23.9151
P62900	RL31_MOUSE	Rpl31	60S ribosomal protein L31		0.190361	-0.186644	7	7	7	46.4	46.4	46.4	14.463	0	34.359	554100000	98	24.468	25.5789	24.982	25.6387	24.5491	25.4277	25.7645	24.807
P62908	RS3_MOUSE	Rps3	40S ribosomal protein S3		0.897929	0.12454	33	33	33	87.7	87.7	87.7	26.674	0	179.65	7944800000	1992	26.4135	26.3031	26.1858	26.5114	26.4571	26.4206	26.227	26.3535
P62911	RL32_MOUSE	Rpl32	60S ribosomal protein L32		0.306572	0.126002	12	12	11	58.5	58.5	51.1	15.86	0	100.14	1716700000	491	25.6626	25.8622	25.8157	25.5461	25.373	25.2969	25.217	25.6103
P62918	RL8_MOUSE	Rpl8	60S ribosomal protein L8		1.77415	-0.548494	19	19	19	51.4	51.4	51.4	28.024	0	121.3	3892600000	699	26.1618	26.2024	26.4123	26.3965	26.4337	26.9358	27.1272	26.9131
P62960	YBOX1_MOUSE	Ybx1	Y-box-binding protein 1		0.77248	0.447892	17	17	12	56.8	56.8	49.4	35.73	0	270.43	605750000	388	24.1501	23.3392	23.5406	23.7922	24.0234	23.4554	22.7386	23.7789
P62983	RS27A_MOUSE	Rps27a	Ubiquitin-40S ribosomal protein S27a		0.0210196	0.0123487	11	11	4	62.2	62.2	26.9	17.951	0	81.7	1539700000	595	24.8743	24.7437	25.151	25.0801	25.0406	25.1522	24.3793	25.0066
P62984	RL40_MOUSE	Uba52	Ubiquitin-60S ribosomal protein L40		0	NaN	9	2	2	51.6	8.6	8.6	14.728	0	4.7954	23780000	27	NaN	NaN	NaN	NaN	NaN	NaN	NaN	NaN
P63001	RAC1_MOUSE	Rac1	Ras-related C3 botulinum toxin substrate 1		1.18613	0.621763	8	7	4	41.1	35.4	19.8	21.45	0	17.304	89016000	50	22.3503	22.6572	22.6106	22.6167	22.4409	21.5563	21.9811	21.43
P63005	LIS1_MOUSE	Pafah1b1	Platelet-activating factor acetylhydrolase IB subunit beta		0	NaN	4	4	4	12.4	12.4	12.4	46.67	0	12.513	2166800	3	NaN	NaN	NaN	NaN	NaN	NaN	NaN	NaN
P63017	HSP7C_MOUSE	Hspa8	Heat shock cognate 71 kDa protein		0.551011	0.0879097	51	49	33	71.7	71.7	51.4	70.87	0	323.31	4164800000	1604	25.2252	25.5064	25.3418	25.5281	25.3263	25.3022	25.2732	25.317
P63024	VAMP3_MOUSE	Vamp3	Vesicle-associated membrane protein 3		0.84267	-0.176435	7	7	7	55.3	55.3	55.3	11.48	0	172.38	264950000	117	22.7438	23.1062	23.142	22.7702	23.0503	22.9521	23.1341	23.148
P63028	TCTP_MOUSE	Tpt1	Translationally-controlled tumor protein		0.520355	-0.393654	6	6	6	29.1	29.1	29.1	19.462	0	28.005	145170000	84	22.6193	22.0797	21.7591	22.3667	22.3388	23.0066	23.039	23.1743
P63030	MPC1_MOUSE	Mpc1	Mitochondrial pyruvate carrier 1		0.397632	-0.24451	10	10	10	88.1	88.1	88.1	12.454	0	79.686	484500000	243	24.7918	25.6901	25.0943	24.9541	25.2847	25.8804	25.1645	25.5596
P63037	DNJA1_MOUSE	Dnaja1	DnaJ homolog subfamily A member 1		0	0.0945745	4	4	4	14.4	14.4	14.4	44.868	0	11.102	14556000	20	NaN	20.9958	20.8089	NaN	NaN	20.8721	20.8621	21.0618
P63038	CH60_MOUSE	Hspd1	60 kDa heat shock protein, mitochondrial		0.0104672	-0.00516319	43	43	43	69.5	69.5	69.5	60.955	0	302.36	1348100000	622	24.4603	24.2737	24.1999	24.1148	24.6089	24.6668	24.1247	24.487
A0A0G2JGT5	A0A0G2JGT5_MOUSE	Eif4e	Eukaryotic translation initiation factor 4E (Fragment)		0	NaN	2	2	2	18.6	18.6	18.6	21.371	0.0069267	1.7568	4443500	3	NaN	NaN	NaN	NaN	NaN	NaN	NaN	NaN
A0A338P781	A0A338P781_MOUSE	Mapk1	Mitogen-activated protein kinase 1 (Fragment)		0	NaN	1	1	1	8.3	8.3	8.3	12.562	0.00038956	2.5844	1216500	2	NaN	NaN	NaN	NaN	NaN	NaN	NaN	NaN
P63087	PP1G_MOUSE	Ppp1cc	Serine/threonine-protein phosphatase PP1-gamma catalytic subunit		0	NaN	8	1	1	32.8	3.1	3.1	36.983	0	2.8889	3260900	8	NaN	NaN	NaN	NaN	NaN	NaN	NaN	NaN
P63094	GNAS2_MOUSE	Gnas	Guanine nucleotide-binding protein G(s) subunit alpha isoforms short		1.32162	0.363108	12	11	11	35	32.2	32.2	45.663	0	36.657	73066000	67	21.3939	21.6	21.3554	21.3769	21.7187	21.0234	21.3699	20.8884
P63101	1433Z_MOUSE	Ywhaz	14-3-3 protein zeta/delta		0.580081	-0.158097	22	22	17	72.2	72.2	64.5	27.771	0	198.75	538840000	226	23.9458	23.8496	23.7291	24.0317	23.899	24.2011	24.1632	24.2651
A0A0J9YUD8	A0A0J9YUD8_MOUSE	Hmgb1	High mobility group protein B1		0	NaN	3	3	3	26.3	26.3	26.3	19.774	0	9.6503	13481000	9	NaN	NaN	NaN	NaN	NaN	NaN	NaN	NaN
P63213	GBG2_MOUSE	Gng2	Guanine nucleotide-binding protein G(I)/G(S)/G(O) subunit gamma-2		0	NaN	1	1	1	16.9	16.9	16.9	7.8501	0.004065	1.9037	249580	1	NaN	NaN	NaN	NaN	NaN	NaN	NaN	NaN
A0A0A0MQM0	A0A0A0MQM0_MOUSE	Eif5a	Eukaryotic translation initiation factor 5A (Fragment)		0.834448	-0.346224	8	8	8	71.8	71.8	71.8	16.302	0	37.835	112300000	68	22.0034	22.3106	21.9482	22.12	22.273	22.8134	22.6932	22.637
P63260	ACTG_MOUSE	Actg1	Actin, cytoplasmic 2		2.2963	-0.364527	33	33	1	79.7	79.7	4.5	41.792	0	323.31	12442000000	3392	26.9991	27.0607	27.2584	26.9055	27.2231	27.4884	27.4587	27.4411
P63276	RS17_MOUSE	Rps17	40S ribosomal protein S17		1.2272	-0.429014	14	14	14	63.7	63.7	63.7	15.524	0	163.04	1294300000	779	24.6565	24.6387	24.6784	24.8969	24.6098	25.517	25.1361	25.1864
P63321	RALA_MOUSE	Rala	Ras-related protein Ral-A		0	NaN	4	2	2	19.4	10.7	10.7	23.553	0	7.4318	2029900	7	NaN	NaN	NaN	NaN	NaN	NaN	NaN	NaN
P63325	RS10_MOUSE	Rps10	40S ribosomal protein S10		0.42348	0.16787	17	16	16	70.9	70.9	70.9	18.916	0	88.591	2201700000	541	28.2395	27.8252	28.3329	28.4786	28.3138	27.9432	28.0785	27.831
P67778	PHB_MOUSE	Phb	Prohibitin		0.54719	-0.0734611	25	25	25	90.4	90.4	90.4	29.82	0	266.77	1694200000	467	25.4682	25.4911	25.6481	25.5755	25.3877	25.6293	25.4711	25.4678
P67984	RL22_MOUSE	Rpl22	60S ribosomal protein L22		0.174264	0.184283	9	9	7	69.5	69.5	62.5	14.759	0	80.157	701760000	191	24.1243	24.6913	24.3628	25.0737	24.3707	24.5206	25.1832	23.4563
P68033	ACTC_MOUSE	Actc1	Actin, alpha cardiac muscle 1		1.77069	-0.269719	31	15	1	77.7	51.2	7.2	42.019	0	243.29	1509100000	391	25.1259	24.7575	25.1609	24.8642	24.9198	25.1913	25.2629	25.1311
A0A338P702	A0A338P702_MOUSE	Ube2l3	Ubiquitin-conjugating enzyme E2 L3		0	0.0845642	3	3	3	36.8	36.8	36.8	13.173	0	5.0591	12938000	13	NaN	21.1868	21.1023	NaN	NaN	NaN	NaN	NaN
P68040	RACK1_MOUSE	Rack1	Receptor of activated protein C kinase 1		0.502555	-0.166738	32	32	32	89	89	89	35.076	0	323.31	6433000000	1169	26.5053	26.1466	26.1952	26.3795	26.4263	26.8323	26.5225	26.5745
P68254	1433T_MOUSE	Ywhaq	14-3-3 protein theta		0.512588	0.12557	12	7	7	48.6	40.4	40.4	27.778	0	66.097	40267000	28	21.9109	21.8278	21.8713	21.9533	21.7504	NaN	21.5987	NaN
P68368	TBA4A_MOUSE	Tuba4a	Tubulin alpha-4A chain		0.154063	-0.0216475	30	30	7	65.4	65.4	15.6	49.924	0	323.31	1282600000	475	25.7372	25.7293	25.6402	25.6204	25.772	25.6889	25.8065	25.8099
P68369	TBA1A_MOUSE	Tuba1a	Tubulin alpha-1A chain		0	NaN	29	1	1	68.5	3.1	3.1	50.135	0	8.4923	1496900	1	NaN	NaN	NaN	NaN	NaN	NaN	NaN	NaN
P68372	TBB4B_MOUSE	Tubb4b	Tubulin beta-4B chain		1.50541	0.324699	27	27	6	74.4	74.4	17.3	49.83	0	275.68	1328500000	664	25.0578	25.0331	24.9679	24.8598	25.0943	24.4691	24.6376	24.6717
P68373	TBA1C_MOUSE	Tuba1c	Tubulin alpha-1C chain		0.0681947	-0.0361706	29	4	2	68.4	12.7	9.6	49.909	0	22.636	30308000	23	21.4048	21.556	NaN	21.6549	21.4333	21.6402	21.1497	21.8553
P68510	1433F_MOUSE	Ywhah	14-3-3 protein eta		0.886183	-0.185084	14	11	10	51.2	47.2	43.1	28.211	0	37.329	93647000	41	22.7089	22.7019	23.0247	22.9722	22.9456	22.8027	23.0942	23.1474
P70124	SPB5_MOUSE	Serpinb5	Serpin B5		0.940556	-0.153906	5	5	5	16.5	16.5	16.5	42.111	0	18.633	14481000	17	20.8252	NaN	NaN	20.7188	20.7576	NaN	20.9978	20.8444
P70168	IMB1_MOUSE	Kpnb1	Importin subunit beta-1		0	NaN	2	2	2	2.4	2.4	2.4	97.183	0	6.292	5401000	13	NaN	NaN	NaN	NaN	NaN	18.8339	NaN	19.5122
P70195	PSB7_MOUSE	Psmb7	Proteasome subunit beta type-7		1.96525	-0.650823	4	4	4	14.8	14.8	14.8	29.891	0	8.417	20247000	29	20.1452	20.1135	20.8532	20.6131	20.3653	20.8482	NaN	21.1789
P70202	LXN_MOUSE	Lxn	Latexin		0	0.606648	3	3	3	17.6	17.6	17.6	25.492	0	16.489	12396000	13	NaN	20.6406	20.1745	NaN	NaN	NaN	19.8934	NaN
P70227	ITPR3_MOUSE	Itpr3	Inositol 1,4,5-trisphosphate receptor type 3		2.1065	0.31107	37	37	33	16.7	16.7	15.4	304.27	0	125.89	117960000	155	21.6734	21.3585	21.1729	21.5972	21.6398	21.2307	21.3347	21.2862
P70245	EBP_MOUSE	Ebp	3-beta-hydroxysteroid-Delta(8),Delta(7)-isomerase		0.0955568	0.0250745	3	3	3	15.2	15.2	15.2	26.215	0	12.786	285890000	64	25.599	25.7607	25.4779	25.5172	25.3867	25.6893	25.4382	25.5579
A0A0R4J007	A0A0R4J007_MOUSE	Pald1	Paladin		0	NaN	1	1	1	1.2	1.2	1.2	96.763	0	3.237	396390	1	NaN	NaN	NaN	NaN	NaN	NaN	NaN	NaN
P70277	SIA7B_MOUSE	St6galnac2	Alpha-N-acetylgalactosaminide alpha-2,6-sialyltransferase 2		2.84512	-1.17199	14	14	14	39.9	39.9	39.9	42.481	0	36.919	56231000	41	21.4034	20.8478	22.1357	20.8015	NaN	22.4133	22.099	22.1103
P70280	VAMP7_MOUSE	Vamp7	Vesicle-associated membrane protein 7		0	NaN	5	5	5	18.2	18.2	18.2	24.967	0	10.82	4481500	12	NaN	NaN	NaN	NaN	NaN	19.3247	NaN	19.6042
Q3U3K9	Q3U3K9_MOUSE	Aup1	Lipid droplet-regulating VLDL assembly factor AUP1		0.294153	0.20174	6	6	6	19.6	19.6	19.6	49.35	0	10.989	13775000	23	NaN	20.4392	19.6056	20.3417	19.9472	20.6294	20.0077	19.9211
P70296	PEBP1_MOUSE	Pebp1	Phosphatidylethanolamine-binding protein 1		0.145228	-0.0636883	9	9	9	84.5	84.5	84.5	20.83	0	47.082	95271000	51	23.12	22.3616	22.8757	22.7407	22.6778	22.6731	22.6981	22.9079
A0A1B0GR78	A0A1B0GR78_MOUSE	Stim1	Stromal interaction molecule 1		0	-0.181408	3	2	2	8.5	5.6	5.6	62.195	0	53.615	4604800	12	NaN	NaN	19.8536	19.6722	NaN	NaN	NaN	NaN
P70349	HINT1_MOUSE	Hint1	Histidine triad nucleotide-binding protein 1		0	0.0175629	5	5	5	58.7	58.7	58.7	13.777	0	15.247	41831000	19	NaN	NaN	21.9831	NaN	21.7757	21.3486	22.297	21.4037
P70398	USP9X_MOUSE	Usp9x	Probable ubiquitin carboxyl-terminal hydrolase FAF-X		0	NaN	4	4	4	2.1	2.1	2.1	290.71	0	4.0255	4078200	4	NaN	NaN	NaN	NaN	NaN	NaN	NaN	NaN
H3BKT0	H3BKT0_MOUSE	Cux1	Protein CASP		0	NaN	9	9	9	12.7	12.7	12.7	77.161	0	30.777	9547600	25	NaN	NaN	NaN	NaN	NaN	19.6217	NaN	19.3987
P70404	IDHG1_MOUSE	Idh3g	Isocitrate dehydrogenase [NAD] subunit gamma 1, mitochondrial		0.289033	-0.161064	8	8	8	30.3	30.3	30.3	42.785	0	22.878	59641000	58	21.1889	21.3385	21.0352	20.8916	21.6807	21.5502	21.3449	21.8135
P70419	GALT3_MOUSE	Galnt3	Polypeptide N-acetylgalactosaminyltransferase 3		0.938108	0.252457	13	13	13	29.2	29.2	29.2	72.931	0	32.143	85203000	72	21.6359	22.2675	21.6692	22.0419	22.097	21.771	21.7934	21.7989
E9Q1M5	E9Q1M5_MOUSE	Ext2	Exostosin-2		0	NaN	2	2	2	4.7	4.7	4.7	45.926	0.0044264	1.8905	602560	2	NaN	NaN	NaN	NaN	NaN	NaN	NaN	NaN
P70441	NHRF1_MOUSE	Slc9a3r1	Na(+)/H(+) exchange regulatory cofactor NHE-RF1		0.289355	-0.151005	29	29	29	84.5	84.5	84.5	38.6	0	164.22	574840000	283	23.5882	23.3557	23.1926	23.0468	23.7528	23.5115	23.909	23.7344
P70445	4EBP2_MOUSE	Eif4ebp2	Eukaryotic translation initiation factor 4E-binding protein 2		0	NaN	1	1	1	11.7	11.7	11.7	12.898	0	2.6334	749600	5	NaN	NaN	NaN	NaN	NaN	NaN	NaN	NaN
P70452	STX4_MOUSE	Stx4	Syntaxin-4		0	0.390742	5	5	5	16.1	16.1	16.1	34.165	0	18.143	8633000	22	19.4518	NaN	18.7726	NaN	NaN	19.337	NaN	19.0735
P70460	VASP_MOUSE	Vasp	Vasodilator-stimulated phosphoprotein		0	NaN	4	4	4	16.8	16.8	16.8	39.666	0	8.3162	2239700	6	NaN	NaN	NaN	NaN	NaN	NaN	NaN	NaN
Q60817	NACA_MOUSE	Naca	Nascent polypeptide-associated complex subunit alpha		0	NaN	1	1	1	7	7	7	23.384	0	20.446	4507500	5	NaN	NaN	NaN	NaN	NaN	NaN	NaN	NaN
P70677	CASP3_MOUSE	Casp3	Caspase-3		0.58182	0.10496	3	3	3	13	13	13	31.474	0	9.1131	14198000	18	20.3283	NaN	NaN	20.1819	NaN	20.2285	20.089	20.133
A0A0M3HEP7	A0A0M3HEP7_MOUSE	Atp8a1	Phospholipid-transporting ATPase		0	NaN	1	1	1	1	1	1	131.51	0	4.9676	207650	2	NaN	NaN	NaN	NaN	NaN	NaN	NaN	NaN
P80313	TCPH_MOUSE	Cct7	T-complex protein 1 subunit eta		0.0919314	0.0634475	15	15	15	37.1	37.1	37.1	59.652	0	110.76	50707000	56	21.5304	21.8433	21.7858	20.9662	22.051	21.4846	21.3905	21.4762
P80314	TCPB_MOUSE	Cct2	T-complex protein 1 subunit beta		0.729575	-0.504163	20	20	20	46.7	46.7	46.7	57.477	0	129.23	103670000	98	22.1701	21.8462	21.4937	21.7395	21.6376	22.3701	23.0174	22.529
P80315	TCPD_MOUSE	Cct4	T-complex protein 1 subunit delta		0.947129	-0.276927	21	21	21	41.4	41.4	41.4	58.066	0	69.425	101560000	106	21.3188	21.3938	21.6022	21.391	21.5425	21.3556	22.0299	21.7661
P80316	TCPE_MOUSE	Cct5	T-complex protein 1 subunit epsilon		0.00385268	0.00227213	17	17	17	36.4	36.4	36.4	59.623	0	65.226	76595000	72	21.6497	21.0457	21.7428	21.5376	21.6251	21.091	21.5516	21.4635
P80317	TCPZ_MOUSE	Cct6a	T-complex protein 1 subunit zeta		1.90471	-0.516545	17	17	17	39.4	39.4	39.4	58.004	0	116.66	90855000	78	21.0419	21.5784	21.5844	20.9931	21.2813	21.7372	21.7673	21.8721
P80318	TCPG_MOUSE	Cct3	T-complex protein 1 subunit gamma		0.175465	-0.0788169	25	25	25	50.6	50.6	50.6	60.629	0	67.806	122390000	116	21.7755	21.7612	22.0844	21.6618	22.052	21.517	22.192	21.7725
P81117	NUCB2_MOUSE	Nucb2	Nucleobindin-2		0.116031	-0.0218086	32	32	32	61.4	61.4	61.4	50.304	0	294.75	1545700000	665	24.7601	24.9537	24.9449	24.7687	24.7562	24.8865	24.7275	24.767
D6RHA2	D6RHA2_MOUSE	Renbp	GlcNAc 2-epimerase		0	NaN	1	1	1	3.3	3.3	3.3	48.509	0	3.7585	118760	1	NaN	NaN	NaN	NaN	NaN	NaN	NaN	NaN
P82347	SGCD_MOUSE	Sgcd	Delta-sarcoglycan		0	NaN	3	3	3	11.1	11.1	11.1	32.133	0	5.5234	3752700	7	NaN	NaN	NaN	NaN	NaN	NaN	NaN	NaN
I1E4X8	I1E4X8_MOUSE	Stim2	Stromal interaction molecule 2		0.262085	0.0526185	23	23	22	37.3	37.3	35.1	84.77	0	171.27	69013000	149	21.0605	21.134	21.1926	21.1181	21.2714	21.2099	20.9116	21.0594
P83882	RL36A_MOUSE	Rpl36a	60S ribosomal protein L36a		0.299154	0.344072	6	6	6	29.2	29.2	29.2	12.441	0	17.52	236920000	121	23.2038	24.4025	23.7779	24.4342	23.5292	23.5729	24.2997	22.543
P84078	ARF1_MOUSE	Arf1	ADP-ribosylation factor 1		0.529538	0.294081	14	14	8	81.2	81.2	51.4	20.697	0	92.404	411940000	208	24.4543	24.1448	24.5192	24.3731	24.0761	23.3479	24.0328	23.972
P84084	ARF5_MOUSE	Arf5	ADP-ribosylation factor 5		0.505337	-0.242616	10	4	3	57.2	21.7	13.9	20.529	0	16.171	20403000	42	21.474	21.0765	21.4258	21.2906	21.4459	21.1069	22.0559	21.6689
Q3TWV4	Q3TWV4_MOUSE	Ap2m1	AP-2 complex subunit mu		0.913277	-0.201144	19	19	19	44.1	44.1	44.1	49.389	0	67.573	100070000	84	21.5459	21.3473	21.3534	21.4984	21.4367	21.8073	21.7184	21.7539
P84096	RHOG_MOUSE	Rhog	Rho-related GTP-binding protein RhoG		0.702749	-0.346492	9	8	8	53.9	48.2	48.2	21.308	0	43.842	31336000	27	20.7355	20.3645	NaN	NaN	20.4718	20.929	21.1769	20.5054
A2A547	A2A547_MOUSE	Rpl19	Ribosomal protein L19		0.195895	0.10799	13	13	13	37.1	37.1	37.1	23.247	0	77.289	722890000	437	24.4834	24.8545	24.7598	25.0317	24.9238	24.6687	25.1595	24.2734
P84104	SRSF3_MOUSE	Srsf3	Serine/arginine-rich splicing factor 3		0	NaN	4	4	4	30.5	30.5	30.5	19.329	0	6.6037	2477700	4	NaN	NaN	NaN	NaN	NaN	NaN	NaN	NaN
P85094	ISC2A_MOUSE	Isoc2a	Isochorismatase domain-containing protein 2A		0	NaN	3	3	3	25.2	25.2	25.2	22.417	0	10.583	1670500	4	NaN	NaN	NaN	NaN	NaN	NaN	NaN	NaN
H3BIX4	H3BIX4_MOUSE	Nptn	Neuroplastin (Fragment)		0.098699	0.0567594	5	5	5	22.6	22.6	22.6	24.293	0	10.246	47024000	35	21.4777	21.7367	21.41	21.3708	21.2798	21.1892	21.9336	21.1051
P97315	CSRP1_MOUSE	Csrp1	Cysteine and glycine-rich protein 1		0.172195	-0.124075	12	12	12	64.8	64.8	64.8	20.583	0	42.568	143510000	96	22.1544	21.7495	21.6007	21.9582	21.1275	21.8952	21.6494	22.3405
P97351	RS3A_MOUSE	Rps3a	40S ribosomal protein S3a		0.253709	-0.0789757	32	32	32	72.7	72.7	72.7	29.885	0	188.02	5231000000	1910	25.9627	25.9883	25.8481	26.0589	26.1166	26.3888	26.2315	25.974
P97352	S10AD_MOUSE	S100a13	Protein S100-A13		0	NaN	1	1	1	11.2	11.2	11.2	11.158	0	3.022	341750	3	NaN	NaN	NaN	NaN	NaN	NaN	NaN	NaN
P97363	SPTC2_MOUSE	Sptlc2	Serine palmitoyltransferase 2		0.0058441	-0.00327253	12	12	12	29.8	29.8	29.8	62.981	0	47.076	47186000	50	20.4806	21.0636	20.9181	21.2995	21.1865	21.129	21.0134	20.9828
P97370	AT1B3_MOUSE	Atp1b3	Sodium/potassium-transporting ATPase subunit beta-3		0.60622	-0.111621	10	10	10	30.2	30.2	30.2	31.775	0	35.306	191580000	150	24.2334	23.9653	24.079	23.914	23.8851	24.1625	24.1756	24.0272
G3UXZ5	G3UXZ5_MOUSE	Psme1	Proteasome activator complex subunit 1 (Fragment)		0.553386	0.224086	7	7	6	36.1	36.1	31.5	27.411	0	22.439	14337000	23	20.0696	20.0338	NaN	20.2025	20.6827	20.0366	19.9068	20.1258
P97372	PSME2_MOUSE	Psme2	Proteasome activator complex subunit 2		0	NaN	4	3	3	23.4	18.8	18.8	27.057	0	12.06	7811000	9	NaN	NaN	NaN	NaN	NaN	20.89	20.7392	20.8107
P97379	G3BP2_MOUSE	G3bp2	Ras GTPase-activating protein-binding protein 2		0	NaN	1	1	1	2.7	2.7	2.7	54.087	0.00076687	2.3707	1118500	2	NaN	NaN	NaN	NaN	NaN	NaN	NaN	NaN
P97384	ANX11_MOUSE	Anxa11	Annexin A11		0.95645	-0.300025	9	9	9	21.7	21.7	21.7	54.079	0	44.229	40482000	55	20.4869	20.2357	20.8915	20.9102	20.8259	20.8382	21.0163	20.9128
P97390	VPS45_MOUSE	Vps45	Vacuolar protein sorting-associated protein 45		0.660103	-0.334374	12	12	12	24.2	24.2	24.2	65.052	0	30.121	31563000	37	20.7213	19.8886	20.4063	20.7265	20.474	20.7621	20.8955	21.0839
P97429	ANXA4_MOUSE	Anxa4	Annexin A4		0.869625	0.267031	18	18	18	51.4	51.4	51.4	35.915	0	96.272	132780000	101	21.8963	22.0917	22.1178	21.9606	22.0797	21.4464	21.8159	21.5802
A2AEX7	A2AEX7_MOUSE	Fhl1	Four and a half LIM domains protein 1		0	NaN	3	3	3	14.8	14.8	14.8	23.686	0	6.1579	924830	5	NaN	NaN	NaN	NaN	NaN	NaN	NaN	NaN
P97449	AMPN_MOUSE	Anpep	Aminopeptidase N		0.373789	-0.119507	12	12	12	13.8	13.8	13.8	109.65	0	56.871	44489000	55	20.8116	20.8897	21.1189	20.4548	20.8802	20.7265	20.9344	20.7345
P97450	ATP5J_MOUSE	Atp5pf	ATP synthase-coupling factor 6, mitochondrial		0.16456	0.059464	8	8	8	50.9	50.9	50.9	12.496	0	58.229	1175500000	192	25.4325	25.0714	25.0979	24.776	25.1573	25.1118	24.9655	25.024
P97478	COQ7_MOUSE	Coq7	5-demethoxyubiquinone hydroxylase, mitochondrial		0	NaN	2	2	2	9.2	9.2	9.2	24.041	0	5.0021	2231200	6	NaN	NaN	NaN	NaN	NaN	NaN	NaN	NaN
G3UZY2	G3UZY2_MOUSE	Txn2	Thioredoxin, mitochondrial (Fragment)		0	NaN	2	2	2	23.8	23.8	23.8	14.099	0	4.4693	3657900	5	NaN	NaN	NaN	NaN	NaN	NaN	NaN	NaN
P97503	NKX32_MOUSE	Nkx3-2	Homeobox protein Nkx-3.2		0	NaN	1	1	1	2.7	2.7	2.7	35.167	0.0093424	1.6119	15296000	1	NaN	NaN	NaN	NaN	NaN	NaN	NaN	NaN
P97742	CPT1A_MOUSE	Cpt1a	Carnitine O-palmitoyltransferase 1, liver isoform		0	NaN	4	3	3	6.1	4.7	4.7	88.25	0	10.205	8765600	10	NaN	NaN	NaN	NaN	NaN	19.4822	19.1354	19.3119
P97765	WBP2_MOUSE	Wbp2	WW domain-binding protein 2		0	NaN	3	3	3	14.9	14.9	14.9	28.032	0	6.0442	1470500	4	NaN	NaN	NaN	NaN	NaN	17.8805	NaN	18.6674
P97792	CXAR_MOUSE	Cxadr	Coxsackievirus and adenovirus receptor homolog		0	NaN	1	1	1	3.3	3.3	3.3	39.947	0	2.6741	552240	1	NaN	NaN	NaN	NaN	NaN	NaN	NaN	NaN
P97797	SHPS1_MOUSE	Sirpa	Tyrosine-protein phosphatase non-receptor type substrate 1		0	NaN	1	1	1	1.8	1.8	1.8	56.413	0	2.7407	1835100	15	NaN	NaN	NaN	NaN	NaN	NaN	NaN	NaN
P97807	FUMH_MOUSE	Fh	Fumarate hydratase, mitochondrial		0.623496	0.11237	18	18	18	48.5	48.5	48.5	54.356	0	132.68	136100000	90	22.6734	22.2876	22.4308	22.4678	22.4125	22.2889	22.3357	22.3365
P97821	CATC_MOUSE	Ctsc	Dipeptidyl peptidase 1		0.645043	0.346519	5	5	5	15.4	15.4	15.4	52.376	0	45.119	39102000	23	21.7377	21.5662	21.2671	21.2503	22.2139	21.0445	21.7992	21.2712
J3QP56	J3QP56_MOUSE	Lypla1	Acyl-protein thioesterase 1		0.168955	0.142966	3	3	3	14.3	14.3	14.3	23.726	0	9.4621	11395000	18	21.01	20.4019	20.8036	NaN	20.2692	20.4201	20.0285	NaN
P97926	OXYR_MOUSE	Oxtr	Oxytocin receptor		0	NaN	1	1	1	4.9	4.9	4.9	42.804	0	71.732	18108000	13	NaN	NaN	NaN	NaN	NaN	NaN	NaN	NaN
E9QL31	E9QL31_MOUSE	Dab2	Disabled homolog 2		0.546079	-0.197036	15	15	15	27.9	27.9	27.9	79.992	0	55.231	68954000	70	21.5022	21.4989	21.2799	20.871	21.1497	21.459	21.6208	21.4503
F8WGI9	F8WGI9_MOUSE	Vldlr	Very low-density lipoprotein receptor		0	NaN	2	2	2	2.9	2.9	2.9	89.004	0.00076658	2.3674	23916000	5	NaN	NaN	NaN	NaN	NaN	NaN	NaN	NaN
P98192	GNPAT_MOUSE	Gnpat	Dihydroxyacetone phosphate acyltransferase		0	NaN	1	1	1	1.5	1.5	1.5	76.869	0	3.0539	1399000	4	NaN	NaN	NaN	NaN	NaN	NaN	NaN	NaN
A0A286YCV0	A0A286YCV0_MOUSE	Atp9b	Phospholipid-transporting ATPase		0	NaN	4	4	3	5	5	4.1	127.94	0	41.702	5097100	7	NaN	NaN	NaN	NaN	NaN	NaN	NaN	NaN
F6Z4J2	F6Z4J2_MOUSE	Atp11a	Phospholipid-transporting ATPase (Fragment)		0	NaN	1	1	1	1.5	1.5	1.5	67.356	0	3.0179	552510	3	NaN	NaN	NaN	NaN	NaN	NaN	NaN	NaN
P99024	TBB5_MOUSE	Tubb5	Tubulin beta-5 chain		0.749021	0.239691	25	6	5	70.3	20.5	17.1	49.67	0	28.153	150060000	78	22.8712	22.779	22.859	22.6056	22.7271	22.182	22.6136	22.3695
P99026	PSB4_MOUSE	Psmb4	Proteasome subunit beta type-4		0.429301	0.181401	5	5	5	22.7	22.7	22.7	29.116	0	13.139	17984000	19	NaN	20.3466	20.0784	NaN	20.0523	NaN	19.9577	NaN
P99027	RLA2_MOUSE	Rplp2	60S acidic ribosomal protein P2		0.562516	-0.17777	14	14	14	97.4	97.4	97.4	11.651	0	217.44	5636600000	789	26.73	26.6886	26.4456	26.6342	26.5349	27.1104	26.9436	26.7992
P99028	QCR6_MOUSE	Uqcrh	Cytochrome b-c1 complex subunit 6, mitochondrial		0.241842	0.133305	9	9	9	78.7	78.7	78.7	10.435	0	44.995	510920000	186	24.631	24.2754	24.0316	23.5745	24.0116	23.9271	23.9984	24.0022
P99029	PRDX5_MOUSE	Prdx5	Peroxiredoxin-5, mitochondrial		0.0558347	0.0180197	10	10	10	46.7	46.7	46.7	21.897	0	25.421	161390000	90	23.4553	23.2343	23.1137	23.0256	23.27	23.0994	23.3117	23.3882
Q3TJ55	Q3TJ55_MOUSE	Stx2	Syntaxin-2		0	NaN	1	1	1	3.1	3.1	3.1	33.203	0.0065717	1.7753	5740400	1	NaN	NaN	NaN	NaN	NaN	NaN	NaN	NaN
Q00519	XDH_MOUSE	Xdh	Xanthine dehydrogenase/oxidase		0.269515	0.0940804	60	60	60	58.3	58.3	58.3	146.56	0	323.31	2573800000	1014	25.4754	25.174	25.3362	25.0484	25.4962	24.9406	25.2227	25.3182
V9GX00	V9GX00_MOUSE	Il6st	Interleukin-6 receptor subunit beta		0	NaN	1	1	1	1.6	1.6	1.6	95.371	0	15.166	1426100	4	NaN	NaN	NaN	NaN	NaN	NaN	NaN	NaN
Q00612	G6PD1_MOUSE	G6pdx	Glucose-6-phosphate 1-dehydrogenase X		0.403595	0.0486493	31	31	31	62.1	62.1	62.1	59.262	0	149.6	298390000	176	22.9735	22.9741	23.0227	23.0217	22.9211	22.815	22.9885	22.8695
Q00623	APOA1_MOUSE	Apoa1	Apolipoprotein A-I		0.0805712	0.0438147	22	22	19	57.6	57.6	53.4	30.615	0	58.45	724280000	310	24.2127	23.6081	24.2227	24.1583	24.1837	24.2242	23.7185	23.8221
Q00897	A1AT4_MOUSE	Serpina1d	Alpha-1-antitrypsin 1-4		0.395194	0.385259	15	4	4	39.5	11.9	11.9	45.998	0	33.358	39760000	26	22.4184	21.6445	21.7292	21.5756	21.2949	21.864	20.313	21.4863
A0A494BAL6	A0A494BAL6_MOUSE	Gm50139	Predicted gene, 50139 (Fragment)		0	NaN	1	1	1	7.5	7.5	7.5	14.958	0.0096601	1.5601	422530	2	NaN	NaN	NaN	NaN	NaN	NaN	NaN	NaN
Q01149	CO1A2_MOUSE	Col1a2	Collagen alpha-2(I) chain		0.351322	0.338113	6	6	6	4.3	4.3	4.3	129.56	0	8.0519	52310000	77	21.3312	21.8697	20.5468	21.1384	20.9181	20.648	22.0554	20.6547
Q01237	HMDH_MOUSE	Hmgcr	3-hydroxy-3-methylglutaryl-coenzyme A reductase		0.132577	-0.0589919	12	12	12	16.2	16.2	16.2	97.039	0	52.403	52201000	64	20.5823	20.3373	20.1898	20.0478	20.4863	20.6609	20.2423	20.5968
Q01279	EGFR_MOUSE	Egfr	Epidermal growth factor receptor		0	NaN	6	6	6	7	7	7	134.85	0	11.687	5696200	18	NaN	NaN	NaN	NaN	NaN	19.4576	20.6958	19.1248
Q01339	APOH_MOUSE	Apoh	Beta-2-glycoprotein 1		0.503381	0.123999	13	13	13	41.2	41.2	41.2	38.618	0	33.782	128780000	103	22.334	22.222	22.3105	22.0603	22.3111	22.0891	22.171	21.8608
E9Q1S3	E9Q1S3_MOUSE	Sec23a	Protein transport protein SEC23		0	NaN	6	4	4	11	7.2	7.2	82.955	0	8.8409	3940600	12	NaN	NaN	NaN	NaN	NaN	NaN	19.1524	18.3905
Q01853	TERA_MOUSE	Vcp	Transitional endoplasmic reticulum ATPase		2.57259	0.168736	68	68	68	73.3	73.3	73.3	89.321	0	323.31	1766300000	1027	24.6918	24.7045	24.6173	24.7044	24.7152	24.5039	24.4605	24.5593
Q02013	AQP1_MOUSE	Aqp1	Aquaporin-1		2.102	-0.725801	6	6	6	31.6	31.6	31.6	28.793	0	109.91	144190000	76	23.6147	23.4807	24.4074	23.8294	23.273	24.4269	23.8424	24.4243
Q02053	UBA1_MOUSE	Uba1	Ubiquitin-like modifier-activating enzyme 1		0.631747	-0.230088	15	15	15	17.7	17.7	17.7	117.81	0	136.46	48218000	46	20.5016	20.4923	20.2481	20.4376	20.6136	21.0137	20.8087	20.895
Q02248	CTNB1_MOUSE	Ctnnb1	Catenin beta-1		0.632865	-0.103246	30	30	25	51.7	51.7	46.4	85.47	0	151.65	297800000	270	22.5328	22.5864	22.7193	22.599	22.7608	22.6364	22.8948	22.6414
Q02257	PLAK_MOUSE	Jup	Junction plakoglobin		0.0917681	0.066915	26	21	21	44.4	37	37	81.8	0	74.955	96128000	91	21.4511	22.0909	21.8841	21.7749	22.0935	21.4692	22.359	21.4305
G3UY11	G3UY11_MOUSE	Ank1	Ankyrin-1		0	NaN	1	1	1	0.9	0.9	0.9	113.97	0	3.0794	572460	2	NaN	NaN	NaN	NaN	NaN	NaN	NaN	NaN
Q02496	MUC1_MOUSE	Muc1	Mucin-1		1.23186	-0.397319	6	6	6	9.7	9.7	9.7	64.538	0	18.957	117970000	63	23.0119	22.6402	22.9435	22.3651	22.6662	23.2536	22.8299	23.2455
Q02596	GLCM1_MOUSE	Glycam1	Glycosylation-dependent cell adhesion molecule 1		0.803757	0.665663	8	8	8	77.5	77.5	77.5	16.209	0	136.69	1068500000	244	25.0985	25.1355	25.6751	25.0537	25.9916	24.1529	24.4201	24.3685
Q02788	CO6A2_MOUSE	Col6a2	Collagen alpha-2(VI) chain		1.18811	0.538056	25	25	25	25.5	25.5	25.5	110.33	0	107.52	126370000	150	22.332	22.6842	22.5538	22.7112	22.6328	21.5632	22.2684	21.8226
A0A1C7CYU3	A0A1C7CYU3_MOUSE	Nucb1	Nucleobindin-1		0	0.117428	6	6	6	16	16	16	52.997	0	8.7558	7783800	13	19.2448	NaN	NaN	NaN	NaN	18.7783	19.5151	19.0887
Q02862	CS2LA_MOUSE	Csn1s2a	Alpha-S2-casein-like A		0.437095	0.256078	16	16	4	60.9	60.9	15.8	21.1	0	183.5	12723000000	1171	30.2405	31.1597	29.9909	30.8535	30.4829	30.7721	30.5627	30.3866
Q03265	ATPA_MOUSE	Atp5f1a	ATP synthase subunit alpha, mitochondrial		0.934576	-0.185937	59	59	59	78.3	78.3	78.3	59.752	0	323.31	17185000000	2713	28.7753	28.5754	28.6218	28.5179	28.7595	28.9663	28.8482	28.9356
Q04447	KCRB_MOUSE	Ckb	Creatine kinase B-type		0	NaN	3	3	3	8.1	8.1	8.1	42.713	0	10.132	2523200	8	NaN	NaN	NaN	NaN	NaN	NaN	NaN	NaN
Q04736	YES_MOUSE	Yes1	Tyrosine-protein kinase Yes		0	0.459089	5	3	3	9.2	6.1	6.1	60.629	0	3.0204	2920700	8	19.15	NaN	NaN	NaN	NaN	18.8158	18.4262	18.8309
Q04857	CO6A1_MOUSE	Col6a1	Collagen alpha-1(VI) chain		0.733328	0.201308	21	21	21	24.8	24.8	24.8	108.49	0	243.92	200240000	141	22.2702	22.8197	22.5489	22.5684	22.7058	22.2605	22.4262	22.3231
Q05117	PPA5_MOUSE	Acp5	Tartrate-resistant acid phosphatase type 5		0	NaN	1	1	1	5.8	5.8	5.8	36.807	0.0093458	1.6134	859280	1	NaN	NaN	NaN	NaN	NaN	NaN	NaN	NaN
Q05421	CP2E1_MOUSE	Cyp2e1	Cytochrome P450 2E1		0	0.47612	6	6	6	14	14	14	56.804	0	15.021	24566000	20	NaN	NaN	22.4183	22.1762	NaN	21.8612	20.6436	21.8771
F7CVZ7	F7CVZ7_MOUSE	Mark2	Non-specific serine/threonine protein kinase (Fragment)		0	NaN	1	1	1	4.6	4.6	4.6	33.46	0.0051471	1.8517	519960	1	NaN	NaN	NaN	NaN	NaN	NaN	NaN	NaN
Q05793	PGBM_MOUSE	Hspg2	Basement membrane-specific heparan sulfate proteoglycan core protein		0	NaN	3	3	3	1.1	1.1	1.1	398.29	0	6.5451	1315000	6	NaN	NaN	NaN	NaN	NaN	NaN	NaN	NaN
Q05816	FABP5_MOUSE	Fabp5	Fatty acid-binding protein 5		1.01686	-0.356098	11	11	11	80	80	80	15.137	0	83.1	142740000	123	21.9084	21.8425	22.2352	21.588	22.0114	22.1766	21.7995	22.5634
Q06138	CAB39_MOUSE	Cab39	Calcium-binding protein 39		0	NaN	1	1	1	4.4	4.4	4.4	39.842	0	3.9749	3084300	5	NaN	NaN	NaN	NaN	NaN	NaN	NaN	NaN
Q06185	ATP5I_MOUSE	Atp5me	ATP synthase subunit e, mitochondrial		0.273406	0.112005	5	5	5	56.3	56.3	56.3	8.2355	0	24.284	1076200000	318	25.8293	26.0351	25.8528	25.5399	25.7808	25.7435	25.855	25.2857
Q06890	CLUS_MOUSE	Clu	Clusterin		2.16852	1.27036	21	21	21	38.8	38.8	38.8	51.655	0	118.1	794340000	342	24.1455	24.9917	23.5941	25.0904	24.8068	23.2673	24.0823	23.0093
A0A2C9F2D2	A0A2C9F2D2_MOUSE	Anxa7	Annexin		0.247369	0.0768766	15	15	15	35.7	35.7	35.7	52.27	0	90.215	200710000	183	23.0422	23.343	23.0868	23.3867	23.0816	23.1477	23.374	22.9374
Q07113	MPRI_MOUSE	Igf2r	Cation-independent mannose-6-phosphate receptor		0.181234	0.0730815	56	56	56	27.5	27.5	27.5	273.81	0	213.25	321590000	273	22.2827	22.139	21.9499	21.6091	22.0762	21.8247	22.1121	21.928
Q07417	ACADS_MOUSE	Acads	Short-chain specific acyl-CoA dehydrogenase, mitochondrial		0.535821	-0.120932	11	11	11	31.6	31.6	31.6	44.889	0	41.122	43050000	42	20.955	20.7876	20.9367	20.5773	21.0491	20.9933	20.9808	20.9418
A0A1B0GS13	A0A1B0GS13_MOUSE	Bax	Apoptosis regulator BAX (Fragment)		0	NaN	1	1	1	11.4	11.4	11.4	12.513	0	5.431	722210	2	NaN	NaN	NaN	NaN	NaN	NaN	NaN	NaN
Q08091	CNN1_MOUSE	Cnn1	Calponin-1		0.295994	-0.152703	8	8	8	31.6	31.6	31.6	33.355	0	38.615	35599000	38	21.0785	21.593	21.384	21.0974	NaN	21.7462	21.0853	21.4206
B1ARB3	B1ARB3_MOUSE	Pecam1	Platelet endothelial cell adhesion molecule		0.497683	-0.32207	5	5	5	11.9	11.9	11.9	81.917	0	53.665	11087000	20	NaN	19.0071	19.6176	19.1382	NaN	18.8456	19.4781	19.6375
Q08857	CD36_MOUSE	Cd36	Platelet glycoprotein 4		2.33627	-0.55217	19	19	19	37.9	37.9	37.9	52.697	0	163.1	2498700000	553	26.579	26.369	26.9397	26.4729	26.2764	26.9033	27.2822	26.7808
B0V3P6	B0V3P6_MOUSE	Bcl2l15	Bcl-2-like protein 15		0	NaN	1	1	1	9.1	9.1	9.1	18.066	0	25.681	0	1	NaN	NaN	NaN	NaN	NaN	NaN	NaN	NaN
Q09143	SL7A1_MOUSE	Slc7a1	High affinity cationic amino acid transporter 1		0	NaN	2	2	2	6.3	6.3	6.3	67.091	0	5.6188	1362400	3	NaN	NaN	NaN	NaN	NaN	NaN	NaN	NaN
Q09200	B4GN1_MOUSE	B4galnt1	Beta-1,4 N-acetylgalactosaminyltransferase 1		0.54884	0.207989	16	16	16	34	34	34	59.211	0	65.373	161140000	147	21.7569	22.1009	21.9656	21.9488	22.4019	21.5132	21.9931	21.9047
E9Q039	E9Q039_MOUSE	Npepps	Aminopeptidase		0	NaN	4	4	4	5.1	5.1	5.1	100.13	0	8.0759	3100800	3	NaN	NaN	NaN	NaN	NaN	18.1856	NaN	19.828
Q11127	FUT4_MOUSE	Fut4	Alpha-(1,3)-fucosyltransferase 4		0.01645	-0.00927862	5	5	5	14.8	14.8	14.8	49.481	0	20.732	11735000	37	19.3225	NaN	19.1228	19.6044	19.4974	19.826	19.5923	19.3951
Q11136	PEPD_MOUSE	Pepd	Xaa-Pro dipeptidase		0	NaN	1	1	1	2.2	2.2	2.2	55.028	0.0022455	1.9959	565500	3	NaN	NaN	NaN	NaN	NaN	NaN	NaN	NaN
Q149F3	ERF3B_MOUSE	Gspt2	Eukaryotic peptide chain release factor GTP-binding subunit ERF3B		0	NaN	1	1	1	1.6	1.6	1.6	69.146	0	2.8044	420310	1	NaN	NaN	NaN	NaN	NaN	NaN	NaN	NaN
Q149L6	DJB14_MOUSE	Dnajb14	DnaJ homolog subfamily B member 14		0.373323	-0.357619	4	4	4	12.4	12.4	12.4	42.325	0	20.095	6748100	17	18.478	19.4273	18.971	18.7991	19.2721	NaN	NaN	19.7325
Q14AE4	WFDC3_MOUSE	Wfdc3	WAP four-disulfide core domain protein 3		0.0817801	0.0375311	5	5	5	56.2	56.2	56.2	13.718	0	26.843	43039000	36	22.3766	22.3566	22.3744	21.9475	NaN	22.1343	22.3093	21.9394
Q14C51	PTCD3_MOUSE	Ptcd3	Pentatricopeptide repeat domain-containing protein 3, mitochondrial		0	NaN	2	2	2	3.5	3.5	3.5	77.795	0	5.4062	2699300	4	NaN	NaN	NaN	NaN	NaN	NaN	NaN	NaN
Q19LI2	A1BG_MOUSE	A1bg	Alpha-1B-glycoprotein		0.315506	0.340221	5	5	5	9.8	9.8	9.8	56.553	0	12.977	16229000	15	NaN	20.3583	20.0803	NaN	20.5645	20.6895	20.3832	19.3317
X1WI18	X1WI18_MOUSE	Cd300lg	CMRF35-like molecule 9 (Fragment)		0	NaN	1	1	1	5.2	5.2	5.2	28.124	0	2.8629	2036500	4	NaN	NaN	NaN	NaN	NaN	NaN	NaN	NaN
B7ZNP0	B7ZNP0_MOUSE	Edem3	alpha-1,2-Mannosidase		0	NaN	1	1	1	1.4	1.4	1.4	102.22	0.0096497	1.5531	326000	1	NaN	NaN	NaN	NaN	NaN	NaN	NaN	NaN
A0A494BBQ4	A0A494BBQ4_MOUSE	Pi4k2a	Phosphatidylinositol 4-kinase type 2		0	NaN	1	1	1	8.5	8.5	8.5	43.074	0	4.6905	812870	1	NaN	NaN	NaN	NaN	NaN	NaN	NaN	NaN
Q2TPA8	HSDL2_MOUSE	Hsdl2	Hydroxysteroid dehydrogenase-like protein 2		0.0343067	0.0245037	8	8	8	15.5	15.5	15.5	54.208	0	21.863	25600000	42	20.9428	20.9381	20.9604	21.2259	21.603	21.5443	20.7195	21.3875
Q2VLH6	C163A_MOUSE	Cd163	Scavenger receptor cysteine-rich type 1 protein M130		0.133166	-0.284148	9	9	9	8.3	8.3	8.3	120.92	0	16.979	8579900	20	NaN	18.5316	19.8189	19.8009	NaN	NaN	19.0819	NaN
Q31125	S39A7_MOUSE	Slc39a7	Zinc transporter SLC39A7		0.062796	0.0613232	5	5	5	18.5	18.5	18.5	50.656	0	22.2	163240000	135	24.1875	24.0304	24.3026	24.7826	24.7495	24.4997	25.0494	23.6532
Q3B7Z2	OSBP1_MOUSE	Osbp	Oxysterol-binding protein 1		0.659929	0.297166	4	4	4	6.6	6.6	6.6	88.796	0	11.456	10928000	12	NaN	19.378	19.0077	19.7653	19.7361	NaN	19.5167	19.4636
A0A0R4J1H0	A0A0R4J1H0_MOUSE	Marchf5	E3 ubiquitin-protein ligase MARCHF5		0	-0.553801	2	2	2	10.2	10.2	10.2	27.363	0	4.0716	5958300	11	19.6207	NaN	NaN	NaN	NaN	NaN	NaN	20.1745
E0CYA8	E0CYA8_MOUSE	Tmem120b	Transmembrane protein 120B		0	NaN	2	2	2	32.1	32.1	32.1	12.963	0	92.519	29686000	14	NaN	NaN	NaN	NaN	NaN	NaN	22.0756	22.1863
Q3TAA7	S11IP_MOUSE	Stk11ip	Serine/threonine-protein kinase 11-interacting protein		0	NaN	1	1	1	1	1	1	118	0	5.8088	0	1	NaN	NaN	NaN	NaN	NaN	NaN	NaN	NaN
A0A0X1KG67	A0A0X1KG67_MOUSE	Emc10	ER membrane protein complex subunit 10		1.37146	-0.396169	6	6	6	23.9	23.9	23.9	28.187	0	63.477	32585000	44	NaN	21.9394	22.2235	21.9966	NaN	22.4612	22.5666	22.2053
Q3TBT3	STING_MOUSE	Sting1	Stimulator of interferon genes protein		1.73704	0.4794	10	10	10	33.1	33.1	33.1	42.829	0	48.132	67792000	117	21.9643	21.5743	21.6409	22.1974	21.9891	21.3519	21.321	21.4938
Q3TC33	CC127_MOUSE	Ccdc127	Coiled-coil domain-containing protein 127		0.494064	-0.237137	6	6	6	24.6	24.6	24.6	30.509	0	17.144	24941000	30	20.7431	20.2192	20.5695	20.444	20.7122	21.026	20.3582	21.1134
Q3TDN2	FAF2_MOUSE	Faf2	FAS-associated factor 2		0.301477	0.0784292	14	14	14	43.4	43.4	43.4	52.471	0	30.882	75014000	68	21.5409	21.6713	21.8196	21.9254	21.7518	21.6902	21.5952	21.4708
A0A0R4J0D3	A0A0R4J0D3_MOUSE	Stt3b	Dolichyl-diphosphooligosaccharide--protein glycotransferase		0.0629746	-0.0152087	21	20	20	20.4	19.6	19.6	93.314	0	80.574	297730000	353	23.0718	23.2607	23.0702	23.1499	22.9719	23.0331	23.1087	23.3031
F7D0T8	F7D0T8_MOUSE	Rnf157	E3 ubiquitin ligase Rnf157 (Fragment)		0	NaN	1	1	1	2	2	2	54.729	0.00038551	2.4387	343280	3	NaN	NaN	NaN	NaN	NaN	NaN	NaN	NaN
Q3UBW1	Q3UBW1_MOUSE	Spryd7	SPRY domain-containing protein 7		0	0.901274	2	2	2	16.6	16.6	16.6	17.987	0	4.3071	4798000	7	21.2529	NaN	NaN	NaN	NaN	NaN	20.3516	NaN
Q3THG9	AASD1_MOUSE	Aarsd1	Alanyl-tRNA editing protein Aarsd1		0	NaN	1	1	1	3.2	3.2	3.2	44.97	0	5.3671	477490	4	NaN	NaN	NaN	NaN	NaN	NaN	NaN	NaN
A0A1B0GS30	A0A1B0GS30_MOUSE	Ric8a	Synembryn-A		0	NaN	1	1	1	11.9	11.9	11.9	17.855	0	43.151	176240	2	NaN	NaN	NaN	NaN	NaN	NaN	NaN	NaN
Q3TIV5	ZC3HF_MOUSE	Zc3h15	Zinc finger CCCH domain-containing protein 15		0	NaN	1	1	1	3.3	3.3	3.3	48.327	0	4.1645	162270	2	NaN	NaN	NaN	NaN	NaN	NaN	NaN	NaN
A0A3Q4EBV4	A0A3Q4EBV4_MOUSE	Fam98a	Protein FAM98A		0	NaN	1	1	1	3.2	3.2	3.2	33.951	0.0011494	2.3624	183790	1	NaN	NaN	NaN	NaN	NaN	NaN	NaN	NaN
Q3TKY6	CWC27_MOUSE	Cwc27	Spliceosome-associated protein CWC27 homolog		0	NaN	1	1	1	2.1	2.1	2.1	53.542	0.00038536	2.4303	702590	1	NaN	NaN	NaN	NaN	NaN	NaN	NaN	NaN
Q3TL44	NLRX1_MOUSE	Nlrx1	NLR family member X1		1.00623	-0.365623	20	20	20	24.2	24.2	24.2	107.83	0	67.334	74368000	67	21.7189	21.0369	21.4235	21.452	21.3054	21.6891	21.9536	21.9095
Q3TMX7	QSOX2_MOUSE	Qsox2	Sulfhydryl oxidase 2		0	NaN	2	2	2	4.2	4.2	4.2	77.774	0	3.8257	2594400	2	NaN	NaN	NaN	NaN	NaN	NaN	NaN	NaN
A0A0R4J1P4	A0A0R4J1P4_MOUSE	Pgap2	Post-GPI attachment to proteins factor 2		0	NaN	1	1	1	4.4	4.4	4.4	29.327	0	4.0043	16446000	12	NaN	NaN	NaN	NaN	NaN	NaN	NaN	NaN
A0A140LHU9	A0A140LHU9_MOUSE	Pnpla6	Patatin-like phospholipase domain-containing protein 6		0	NaN	4	3	3	4.7	4.1	4.1	145.23	0	12.276	6193600	8	NaN	NaN	NaN	NaN	NaN	20.0997	19.138	NaN
Q3TVI8	PBIP1_MOUSE	Pbxip1	Pre-B-cell leukemia transcription factor-interacting protein 1		0.124588	0.107255	8	8	8	13.5	13.5	13.5	81.163	0	22.478	9325100	25	18.6002	19.6416	18.6689	19.3488	19.1627	19.4311	NaN	19.1433
Q3TW96	UAP1L_MOUSE	Uap1l1	UDP-N-acetylhexosamine pyrophosphorylase-like protein 1		0	NaN	2	2	2	6.1	6.1	6.1	56.613	0	2.7408	2626600	6	NaN	NaN	NaN	NaN	NaN	NaN	NaN	NaN
E0CZF6	E0CZF6_MOUSE	Pip4p1	Phosphatidylinositol-4,5-bisphosphate 4-phosphatase		0	-0.0703545	3	3	2	13.9	13.9	9.5	24.089	0	16.955	8757300	10	20.1833	NaN	20.2536	NaN	NaN	NaN	NaN	NaN
Q3TWW8	SRSF6_MOUSE	Srsf6	Serine/arginine-rich splicing factor 6		0.0742955	-0.109506	6	6	4	19.2	19.2	14.5	39.025	0	14.32	16842000	18	20.9757	20.7487	NaN	NaN	19.3238	20.4922	20.4709	20.4136
Q3TXS7	PSMD1_MOUSE	Psmd1	26S proteasome non-ATPase regulatory subunit 1		0	NaN	7	7	7	12.1	12.1	12.1	105.73	0	28.116	27340000	34	NaN	NaN	20.6655	NaN	NaN	20.5263	20.7345	20.8615
Q3TYD6	LMTK2_MOUSE	Lmtk2	Serine/threonine-protein kinase LMTK2		0	NaN	1	1	1	0.7	0.7	0.7	160.51	0	4.5166	530890	4	NaN	NaN	NaN	NaN	NaN	NaN	NaN	NaN
Q3TYS2	CYBC1_MOUSE	Cybc1	Cytochrome b-245 chaperone 1		0.219428	0.122775	6	6	6	26.2	26.2	26.2	20.921	0	12.669	35856000	42	21.6443	21.3506	21.6317	21.2409	21.8685	21.2071	21.753	21.0215
Q3TZM9	ALG11_MOUSE	Alg11	GDP-Man:Man(3)GlcNAc(2)-PP-Dol alpha-1,2-mannosyltransferase		1.76378	-0.794885	13	13	13	31.5	31.5	31.5	55.269	0	54.695	59631000	52	21.3709	21.6187	21.8645	20.9298	21.8264	22.1135	22.4534	22.494
Q3TZZ7	ESYT2_MOUSE	Esyt2	Extended synaptotagmin-2		0.849355	-0.279821	21	21	21	30.1	30.1	30.1	94.138	0	115.06	83098000	94	21.0013	20.6014	20.8951	20.9118	20.579	20.788	21.3126	21.2171
Q3U0B3	DHR11_MOUSE	Dhrs11	Dehydrogenase/reductase SDR family member 11		0	NaN	1	1	1	5	5	5	28.274	0	3.025	0	1	NaN	NaN	NaN	NaN	NaN	NaN	NaN	NaN
Q3U1J4	DDB1_MOUSE	Ddb1	DNA damage-binding protein 1		0	NaN	4	4	4	3.5	3.5	3.5	126.85	0	6.5175	16704000	11	NaN	NaN	21.5364	NaN	NaN	22.1656	NaN	22.6235
Q3U2C5	RN149_MOUSE	Rnf149	E3 ubiquitin-protein ligase RNF149		0	NaN	2	2	2	6.9	6.9	6.9	42.552	0	6.6621	1622200	10	NaN	NaN	NaN	NaN	NaN	NaN	NaN	NaN
Z4YJR1	Z4YJR1_MOUSE	Lmf1	Lipase maturation factor		0.517564	0.24486	9	9	9	14.8	14.8	14.8	65.734	0	39.354	117880000	91	23.0035	23.1281	23.2661	23.0624	22.8447	22.2484	22.8297	22.715
Q3U4G3	XXLT1_MOUSE	Xxylt1	Xyloside xylosyltransferase 1		0	NaN	1	1	1	2.6	2.6	2.6	43.838	0.00038625	2.4787	333540	1	NaN	NaN	NaN	NaN	NaN	NaN	NaN	NaN
Q3U5Q7	CMPK2_MOUSE	Cmpk2	UMP-CMP kinase 2, mitochondrial		0	NaN	4	4	4	10.5	10.5	10.5	50.036	0	11.607	2713900	5	NaN	NaN	NaN	NaN	NaN	NaN	NaN	NaN
Q3U7R1	ESYT1_MOUSE	Esyt1	Extended synaptotagmin-1		0.689743	0.134655	34	34	34	37.6	37.6	37.6	121.55	0	124.1	210140000	160	22.6603	22.9481	22.6546	22.7044	23.0269	22.6507	22.7708	22.7248
Q3U9G9	LBR_MOUSE	Lbr	Delta(14)-sterol reductase LBR		1.02119	-0.212757	5	5	5	8.8	8.8	8.8	71.439	0	30.019	36977000	36	20.7543	20.9264	20.9571	20.6875	21.0485	20.9626	21.096	21.252
Q3UBX0	TM109_MOUSE	Tmem109	Transmembrane protein 109		0	NaN	3	3	3	7.8	7.8	7.8	26.306	0	4.7538	20673000	45	NaN	NaN	NaN	NaN	NaN	19.8862	21.8541	20.0514
Q3UDR8	YIPF3_MOUSE	Yipf3	Protein YIPF3		0	0.073349	4	4	4	18.4	18.4	18.4	37.998	0	38.168	15962000	23	NaN	19.8779	20.1132	20.4537	20.2281	NaN	NaN	NaN
Q3UDW8	HGNAT_MOUSE	Hgsnat	Heparan-alpha-glucosaminide N-acetyltransferase		0	NaN	2	2	2	4.1	4.1	4.1	72.503	0	6.3064	5212100	5	NaN	NaN	NaN	NaN	NaN	NaN	NaN	NaN
E9QLB2	E9QLB2_MOUSE	Lyplal1	Lysophospholipase-like protein 1		0	NaN	1	1	1	4.6	4.6	4.6	26.34	0.0096429	1.5506	791090	1	NaN	NaN	NaN	NaN	NaN	NaN	NaN	NaN
Q3UFY8	TM10C_MOUSE	Trmt10c	tRNA methyltransferase 10 homolog C		0	NaN	1	1	1	3.4	3.4	3.4	48.385	0.0072438	1.6986	0	1	NaN	NaN	NaN	NaN	NaN	NaN	NaN	NaN
Q3UGC7	EI3JA_MOUSE	Eif3j1	Eukaryotic translation initiation factor 3 subunit J-A		0	NaN	4	4	4	22.2	22.2	22.2	29.343	0	9.9006	10886000	8	NaN	NaN	NaN	NaN	NaN	NaN	NaN	NaN
Q3UHN9	NDST1_MOUSE	Ndst1	Bifunctional heparan sulfate N-deacetylase/N-sulfotransferase 1		0	NaN	4	4	4	4.8	4.8	4.8	100.72	0	6.0625	3200000	5	NaN	NaN	NaN	NaN	NaN	NaN	NaN	NaN
A2AP32	A2AP32_MOUSE	Ndufb6	Complex I-B17		0.188687	0.114134	6	6	6	56.7	56.7	56.7	11.741	0	10.013	60590000	29	22.9881	22.2457	22.7175	22.3998	22.7747	22.8219	22.1509	22.2614
G5E896	G5E896_MOUSE	Edc4	Enhancer of mRNA-decapping protein 4		0.266542	0.0867591	11	11	11	11.9	11.9	11.9	152.48	0	62.623	39537000	38	20.3311	20.5894	20.371	20.4501	20.8249	20.3138	20.478	20.6856
E9Q9M5	E9Q9M5_MOUSE	Usp19	Ubiquitin carboxyl-terminal hydrolase 19		0	NaN	5	5	5	6.5	6.5	6.5	143.45	0	22.886	2862800	9	NaN	NaN	NaN	NaN	NaN	NaN	18.9963	19.3173
Q3UJU9	RMD3_MOUSE	Rmdn3	Regulator of microtubule dynamics protein 3		0.739445	-0.259439	11	11	11	27.9	27.9	27.9	52.028	0	57.091	53858000	55	20.6681	20.4117	20.7269	20.692	20.6578	21.0528	20.4916	21.196
Q3UKC1	TAXB1_MOUSE	Tax1bp1	Tax1-binding protein 1 homolog		0	NaN	2	2	2	3.1	3.1	3.1	93.629	0	3.0748	899500	4	NaN	NaN	NaN	NaN	NaN	NaN	NaN	NaN
Q3ULD5	MCCB_MOUSE	Mccc2	Methylcrotonoyl-CoA carboxylase beta chain, mitochondrial		0.399741	-0.161345	15	15	15	29.8	29.8	29.8	61.378	0	64.084	106230000	102	21.7396	21.4262	21.5961	21.305	21.7233	22.1057	21.4521	21.6857
D3YZN4	D3YZN4_MOUSE	Spg7	Paraplegin		0	NaN	7	7	7	11.7	11.7	11.7	75.002	0	14.53	5913300	10	NaN	NaN	NaN	NaN	NaN	19.4531	NaN	19.3185
Q3ULJ0	GPD1L_MOUSE	Gpd1l	Glycerol-3-phosphate dehydrogenase 1-like protein		0.855436	-0.653421	13	11	11	38.7	33.6	33.6	38.225	0	78.138	34723000	37	20.2926	20.203	19.8117	19.777	18.9602	20.7192	20.4447	20.8709
A0A0G2JFY0	A0A0G2JFY0_MOUSE	Spata5	ATPase family protein 2 homolog		0	NaN	2	2	2	6.4	6.4	6.4	91.287	0	5.5919	108520000	39	NaN	NaN	NaN	NaN	NaN	NaN	NaN	NaN
Q3UMF0	COBL1_MOUSE	Cobll1	Cordon-bleu protein-like 1		1.23522	-2.00345	22	22	1	28	28	0.9	137.38	0	47.362	50872000	57	20.1479	NaN	NaN	17.7562	18.931	20.5491	21.5851	20.7112
Q3UMR5	MCU_MOUSE	Mcu	Calcium uniporter protein, mitochondrial		0	NaN	6	6	6	22.3	22.3	22.3	39.681	0	7.8007	6937600	18	NaN	NaN	NaN	NaN	NaN	NaN	NaN	NaN
A0A3B2WDB3	A0A3B2WDB3_MOUSE	Lclat1	Lysocardiolipin acyltransferase 1 (Fragment)		0	NaN	2	2	2	5.6	5.6	5.6	41.839	0	4.7498	4443600	7	NaN	NaN	NaN	NaN	NaN	NaN	NaN	NaN
Q3UPH1	PRRC1_MOUSE	Prrc1	Protein PRRC1		0	NaN	3	3	3	10.2	10.2	10.2	46.297	0	8.4364	3203000	3	NaN	NaN	NaN	NaN	NaN	NaN	NaN	NaN
S4R2U9	S4R2U9_MOUSE	Arhgef40	Rho guanine nucleotide exchange factor 40		0	NaN	1	1	1	1.1	1.1	1.1	129.47	0	5.5003	262270	2	NaN	NaN	NaN	NaN	NaN	NaN	NaN	NaN
Q3UPL0	SC31A_MOUSE	Sec31a	Protein transport protein Sec31A		0.147203	0.0812082	23	23	23	23.6	23.6	23.6	133.57	0	97.953	127910000	179	22.0364	21.5196	21.4534	21.8823	21.2595	21.6787	21.8766	21.3643
Q3UQ44	IQGA2_MOUSE	Iqgap2	Ras GTPase-activating-like protein IQGAP2		0	NaN	6	2	2	3.6	1.5	1.5	180.53	0	3.1284	440610	1	NaN	NaN	NaN	NaN	NaN	NaN	NaN	NaN
D3Z7V3	D3Z7V3_MOUSE	Slmap	Sarcolemmal membrane-associated protein		0.0691204	0.0229907	27	27	27	41.5	41.5	41.5	90.72	0	200.83	130950000	158	22.2121	22.2884	22.1325	22.2392	21.9672	22.165	21.9274	22.3901
Q3URS9	MITOK_MOUSE	Ccdc51	Mitochondrial potassium channel		0.411502	0.585689	3	3	3	9.9	9.9	9.9	45.132	0	7.4226	5249500	19	18.6798	NaN	19.1172	NaN	20.1003	18.8206	18.4754	NaN
Q8BRB6	Q8BRB6_MOUSE	Tbc1d24	TBC1 domain family member 24		0	NaN	2	2	2	6.5	6.5	6.5	36.907	0	4.3012	1044200	3	NaN	NaN	NaN	NaN	NaN	NaN	NaN	NaN
Q3UVK0	ERMP1_MOUSE	Ermp1	Endoplasmic reticulum metallopeptidase 1		1.03307	0.553765	7	7	7	8.8	8.8	8.8	100.15	0	16.889	18468000	24	20.5165	NaN	19.6725	20.6831	20.6238	19.7054	20.2423	20.5961
E9PYV4	E9PYV4_MOUSE	Niban1	Protein Niban 1		0	NaN	6	6	6	13.7	13.7	13.7	66.824	0	18.495	6296600	10	NaN	NaN	NaN	NaN	NaN	NaN	NaN	NaN
Q3UYV9	NCBP1_MOUSE	Ncbp1	Nuclear cap-binding protein subunit 1		0	NaN	1	1	1	1.3	1.3	1.3	91.926	0	2.8209	233680	1	NaN	NaN	NaN	NaN	NaN	NaN	NaN	NaN
E9QPU2	E9QPU2_MOUSE	Dnah12	Dynein heavy chain 12, axonemal (Fragment)		0	NaN	2	2	2	1.1	1.1	1.1	267.48	0.0075922	1.6867	4920900	6	NaN	NaN	NaN	NaN	NaN	NaN	NaN	NaN
Q3V1H3	HPHL1_MOUSE	Hephl1	Ferroxidase HEPHL1		0	NaN	3	3	3	3.1	3.1	3.1	130.89	0	5.7973	1536800	6	NaN	NaN	NaN	NaN	NaN	NaN	NaN	NaN
Q3V3R4	ITA1_MOUSE	Itga1	Integrin alpha-1		0	NaN	7	7	7	6.1	6.1	6.1	130.81	0	23.458	7547900	14	NaN	NaN	NaN	NaN	NaN	19.3799	19.6376	20.3062
A0A1W2P7X0	A0A1W2P7X0_MOUSE	Abracl	Costars family protein ABRACL (Fragment)		0	NaN	2	2	2	43.9	43.9	43.9	6.4374	0	4.6873	9621300	13	NaN	NaN	NaN	NaN	NaN	19.8811	18.3184	19.7688
Q4PJX1	ODR4_MOUSE	Odr4	Protein odr-4 homolog		0.790546	-0.0959706	18	18	18	36.5	36.5	36.5	49.997	0	64.913	295490000	178	22.8908	22.8772	22.9356	22.9147	22.9321	23.0793	22.8672	23.1167
Q4PZA2	ECE1_MOUSE	Ece1	Endothelin-converting enzyme 1		0	NaN	2	2	2	4	4	4	87.072	0	3.7809	4563600	4	NaN	NaN	NaN	NaN	NaN	NaN	NaN	NaN
A2AGS6	A2AGS6_MOUSE	Trp53i11	Tumor protein p53-inducible protein 11 (Fragment)		0	NaN	1	1	1	17.2	17.2	17.2	9.5972	0	2.7847	2427200	5	NaN	NaN	NaN	NaN	NaN	NaN	NaN	NaN
A0A087WNP6	A0A087WNP6_MOUSE	Cdv3	Protein CDV3		0	0.227838	4	4	4	29.4	29.4	29.4	24.196	0	21.67	10465000	18	19.9084	NaN	19.7073	19.9618	NaN	NaN	NaN	NaN
Q4VBD2	TAPT1_MOUSE	Tapt1	Transmembrane anterior posterior transformation protein 1		0.389849	-0.198127	7	7	7	14.7	14.7	14.7	63.893	0	17.121	19639000	18	NaN	NaN	20.2164	20.3891	19.9459	20.386	20.1895	20.6706
Q501J6	DDX17_MOUSE	Ddx17	Probable ATP-dependent RNA helicase DDX17		0	NaN	4	4	4	6.3	6.3	6.3	72.399	0	3.6536	1850000	4	NaN	NaN	NaN	NaN	NaN	NaN	NaN	NaN
D3YXD8	D3YXD8_MOUSE	Clec12a	C-type lectin domain family 12 member A (Fragment)		0	NaN	1	1	1	5.6	5.6	5.6	20.184	0	3.4728	316530	1	NaN	NaN	NaN	NaN	NaN	NaN	NaN	NaN
Q505D7	OPA3_MOUSE	Opa3	Optic atrophy 3 protein homolog		0.0620125	0.0367425	4	4	4	20.7	20.7	20.7	20.11	0	10.559	48541000	47	22.1301	NaN	21.4704	21.5013	21.6952	22.0315	21.6689	21.7844
Q570Y9	DPTOR_MOUSE	Deptor	DEP domain-containing mTOR-interacting protein		0	NaN	3	3	3	11.2	11.2	11.2	46.119	0	12.316	2215500	3	NaN	NaN	NaN	NaN	NaN	NaN	NaN	NaN
Q8CC47	Q8CC47_MOUSE	Galns	N-acetylgalactosamine-6-sulfatase		0	NaN	2	2	2	4.5	4.5	4.5	48.555	0	2.6916	1974500	3	NaN	NaN	NaN	NaN	NaN	NaN	NaN	NaN
Q59J78	NDUF2_MOUSE	Ndufaf2	NADH dehydrogenase [ubiquinone] 1 alpha subcomplex assembly factor 2		0	-0.138607	4	4	4	27.4	27.4	27.4	19.628	0	6.2239	13912000	15	20.0717	NaN	20.6611	NaN	NaN	19.7595	NaN	NaN
Q5BL07	PEX1_MOUSE	Pex1	Peroxisome biogenesis factor 1		0	NaN	1	1	1	1.2	1.2	1.2	141.43	0	4.8954	120690	1	NaN	NaN	NaN	NaN	NaN	NaN	NaN	NaN
Q5DTI8	ESYT3_MOUSE	Esyt3	Extended synaptotagmin-3		0	NaN	2	2	2	2.5	2.5	2.5	100.07	0.00038895	2.5671	2748100	6	NaN	NaN	NaN	NaN	NaN	NaN	NaN	NaN
Q3TUQ7	Q3TUQ7_MOUSE	Prkaa1	Acetyl-CoA carboxylase kinase		0	NaN	1	1	1	1.8	1.8	1.8	62.727	0	3.3271	332630	2	NaN	NaN	NaN	NaN	NaN	NaN	NaN	NaN
Q5F285	TM256_MOUSE	Tmem256	Transmembrane protein 256		1.18427	-0.569081	2	2	2	32.7	32.7	32.7	11.655	0	11.858	24519000	10	21.7918	NaN	22.2047	21.4855	NaN	NaN	22.2108	NaN
Q5FWK3	RHG01_MOUSE	Arhgap1	Rho GTPase-activating protein 1		0	NaN	2	2	2	5.2	5.2	5.2	50.41	0	3.3161	693330	2	NaN	NaN	NaN	NaN	NaN	NaN	NaN	NaN
G3UYJ3	G3UYJ3_MOUSE	Slc25a51	Solute carrier family 25 member 51 (Fragment)		0	NaN	2	2	2	10.3	10.3	10.3	22.072	0	4.4744	2322600	6	NaN	NaN	NaN	NaN	NaN	NaN	NaN	NaN
J3QNE8	J3QNE8_MOUSE	Slc38a10	Putative sodium-coupled neutral amino acid transporter 10		2.06836	-0.312647	26	26	26	30.4	30.4	30.4	117.14	0	122.25	125730000	130	21.1	20.9339	21.3714	21.1018	21.0105	21.5286	21.1891	21.3079
Q5MJS3	FA20C_MOUSE	Fam20c	Extracellular serine/threonine protein kinase FAM20C		0.37623	0.176198	19	18	18	43.7	41.6	41.6	65.765	0	85.595	144910000	118	22.6342	22.5025	22.863	22.3208	22.4185	22.0327	22.0897	22.1857
G5E8P4	G5E8P4_MOUSE	Cobl	Protein cordon-bleu		0	NaN	3	3	3	2.7	2.7	2.7	141.47	0	12.068	1201500	7	NaN	NaN	NaN	NaN	NaN	NaN	NaN	NaN
Q5NCE8	MRS2_MOUSE	Mrs2	Magnesium transporter MRS2 homolog, mitochondrial		0	0.0788358	2	2	2	4.6	4.6	4.6	49.299	0	7.2103	10005000	18	19.9413	NaN	NaN	NaN	NaN	19.7985	19.8591	19.9299
F8WIU9	F8WIU9_MOUSE	Smim7	Small integral membrane protein 7		0	NaN	1	1	1	15.9	15.9	15.9	7.2675	0	3.9087	0	3	NaN	NaN	NaN	NaN	NaN	NaN	NaN	NaN
Q5RKZ7	MOCS1_MOUSE	Mocs1	Molybdenum cofactor biosynthesis protein 1		0.423287	0.209598	5	5	5	9.1	9.1	9.1	69.858	0	28.397	11063000	25	20.1106	19.6022	NaN	NaN	20.1911	19.562	19.9116	19.8014
Q5RL79	KTAP2_MOUSE	Krtcap2	Keratinocyte-associated protein 2		0	NaN	2	2	2	32.4	32.4	32.4	14.674	0	22.966	9528800	9	NaN	NaN	NaN	NaN	NaN	NaN	NaN	NaN
Q5SGK3	AOXB_MOUSE	Aox2	Aldehyde oxidase 2		0	NaN	1	1	1	0.7	0.7	0.7	147.91	0.00038521	2.4261	830390	2	NaN	NaN	NaN	NaN	NaN	NaN	NaN	NaN
Q5SXA5	Q5SXA5_MOUSE	Tom1l2	TOM1-like protein 2		0	NaN	1	1	1	5	5	5	50.069	0	5.3064	358750	1	NaN	NaN	NaN	NaN	NaN	NaN	NaN	NaN
Q5SS80	DHR13_MOUSE	Dhrs13	Dehydrogenase/reductase SDR family member 13		0	NaN	5	5	5	23.9	23.9	23.9	40.744	0	17.011	12563000	17	NaN	NaN	NaN	NaN	NaN	19.78	20.0006	19.8593
Q5SSH8	NEUFC_MOUSE	Cyb5d2	Neuferricin		0	NaN	1	1	1	4.9	4.9	4.9	29.162	0.0069116	1.7403	358010	3	NaN	NaN	NaN	NaN	NaN	NaN	NaN	NaN
Q5SUC9	SCO1_MOUSE	Sco1	Protein SCO1 homolog, mitochondrial		0	NaN	2	2	2	8.5	8.5	8.5	31.617	0	3.1498	6746500	5	NaN	NaN	NaN	NaN	NaN	NaN	NaN	NaN
Q5SUR0	PUR4_MOUSE	Pfas	Phosphoribosylformylglycinamidine synthase		0	NaN	3	3	3	2.8	2.8	2.8	144.63	0	7.2057	3974500	7	NaN	NaN	NaN	NaN	NaN	NaN	NaN	NaN
Q5SWK7	RN145_MOUSE	Rnf145	RING finger protein 145		0	NaN	1	1	1	1.8	1.8	1.8	74.647	0	5.2994	3455600	5	NaN	NaN	NaN	NaN	NaN	NaN	NaN	NaN
Q5SWT3	S2535_MOUSE	Slc25a35	Solute carrier family 25 member 35		2.94341	-0.500956	9	9	9	36	36	36	32.63	0	43.617	52195000	60	20.6062	20.8119	21.1879	20.8707	NaN	21.2763	21.3251	21.2662
Q5SWU9	ACACA_MOUSE	Acaca	Acetyl-CoA carboxylase 1		0.690564	0.0688748	111	111	100	55.3	55.3	50.6	265.25	0	323.31	1808100000	1039	23.8442	23.8133	23.742	23.8282	23.6704	23.6401	23.7395	23.7591
Q5SX39	MYH4_MOUSE	Myh4	Myosin-4		0.783718	1.47313	14	13	7	8.4	7.9	4.3	222.86	0	59.151	11348000	24	20.8679	NaN	NaN	19.0698	18.9421	18.2286	NaN	18.0783
Q5SYD0	MYO1D_MOUSE	Myo1d	Unconventional myosin-Id		0	NaN	4	4	4	4.4	4.4	4.4	116.08	0	5.4732	2605900	5	NaN	NaN	NaN	NaN	NaN	NaN	NaN	NaN
Q5SYH2	TM199_MOUSE	Tmem199	Transmembrane protein 199		0.565608	-0.109497	4	4	4	22.1	22.1	22.1	23.099	0	80.081	14659000	18	19.6361	19.5924	19.9368	19.8608	19.7832	19.808	NaN	19.7381
Q5U458	DJC11_MOUSE	Dnajc11	DnaJ homolog subfamily C member 11		0.196958	0.0973444	19	19	19	37.4	37.4	37.4	63.232	0	80.174	86903000	80	21.6802	21.4243	20.9993	21.3939	21.7945	21.5344	21.7936	21.5763
Q5U462	CDCP1_MOUSE	Cdcp1	CUB domain-containing protein 1		0.330239	0.201477	8	8	8	11	11	11	92.725	0	23.528	16663000	22	20.2635	20.6442	20.4229	NaN	20.9106	NaN	20.3864	NaN
S4R2M1	S4R2M1_MOUSE	Atp13a4	Cation-transporting ATPase (Fragment)		0	NaN	1	1	1	2.1	2.1	2.1	62.927	0.0058608	1.7997	270650	2	NaN	NaN	NaN	NaN	NaN	NaN	NaN	NaN
A0A2I3BRB9	A0A2I3BRB9_MOUSE	Acbd5	Acyl-CoA-binding domain-containing protein 5		0.272319	-0.161106	9	9	9	22.6	22.6	22.6	53.729	0	27.649	24730000	37	20.319	19.3448	20.1371	20.0465	20.0926	20.3302	19.7593	20.2207
Q5XJY5	COPD_MOUSE	Arcn1	Coatomer subunit delta		0.726967	-0.302174	12	12	12	26.8	26.8	26.8	57.229	0	48.805	55952000	61	20.3166	20.4106	20.3382	20.7592	19.9678	20.8783	20.6265	20.8199
Q5XKN4	JAGN1_MOUSE	Jagn1	Protein jagunal homolog 1		0.446699	-0.499738	3	3	3	13.7	13.7	13.7	21.102	0	64.35	53007000	58	21.9097	21.7354	20.94	21.6091	20.1998	22.2854	22.0394	22.1882
Q5XPT3	LARG2_MOUSE	Large2	LARGE xylosyl- and glucuronyltransferase 2		0	NaN	1	1	1	1.6	1.6	1.6	79.513	0	3.9519	2047700	3	NaN	NaN	NaN	NaN	NaN	NaN	NaN	NaN
Q60520	SIN3A_MOUSE	Sin3a	Paired amphipathic helix protein Sin3a		0	NaN	2	2	2	2	2	2	145.09	0.0015049	2.0817	1637100	3	NaN	NaN	NaN	NaN	NaN	NaN	NaN	NaN
Q60590	A1AG1_MOUSE	Orm1	Alpha-1-acid glycoprotein 1		0	NaN	3	3	3	15	15	15	23.895	0	4.5545	14069000	11	NaN	NaN	NaN	20.7939	20.5067	NaN	NaN	NaN
Q60597	ODO1_MOUSE	Ogdh	2-oxoglutarate dehydrogenase, mitochondrial		0.0416637	-0.0121431	38	38	38	42.2	42.2	42.2	116.45	0	131.04	246160000	217	23.1634	22.9629	23.0418	22.8017	22.9322	23.087	22.7789	23.0011
Q921L6	Q921L6_MOUSE	Cttn	Cttn protein		0.65723	-0.37637	12	12	12	28.3	28.3	28.3	57.086	0	48.722	30129000	62	19.664	19.4108	19.2145	19.4112	18.8755	19.6674	20.2841	19.7009
Q60605	MYL6_MOUSE	Myl6	Myosin light polypeptide 6		0.347969	0.151024	10	10	10	62.9	62.9	62.9	16.93	0	75.903	415200000	212	23.7627	23.6155	23.7709	23.5075	23.5163	22.9452	23.5284	23.5534
Q60631	GRB2_MOUSE	Grb2	Growth factor receptor-bound protein 2		0	-0.0959778	3	3	3	16.6	16.6	16.6	25.238	0	8.4443	7189600	14	NaN	19.3096	NaN	NaN	NaN	NaN	19.4056	NaN
Q5SS83	Q5SS83_MOUSE	Flot2	Flotillin		0.327959	0.166662	5	5	5	13.3	13.3	13.3	47.116	0	22.941	8991200	20	NaN	19.3543	19.4045	19.1019	19.3156	NaN	19.1303	18.7369
Q60648	SAP3_MOUSE	Gm2a	Ganglioside GM2 activator		0.0902799	-0.202885	5	5	5	25.9	25.9	25.9	20.824	0	11.001	25891000	28	20.3199	19.5646	22.2901	21.0792	NaN	19.8057	20.388	19.6127
Q60649	CLPB_MOUSE	Clpb	Caseinolytic peptidase B protein homolog		0	0.266306	4	4	4	9.5	9.5	9.5	76.003	0	7.5783	12312000	11	NaN	NaN	NaN	NaN	20.9831	20.5373	20.8311	20.7821
Q60675	LAMA2_MOUSE	Lama2	Laminin subunit alpha-2		0	NaN	2	2	2	0.6	0.6	0.6	343.81	0	3.3163	4545700	2	NaN	NaN	NaN	NaN	NaN	20.4686	NaN	18.7332
Q60692	PSB6_MOUSE	Psmb6	Proteasome subunit beta type-6		0.738006	0.515856	6	6	6	38.2	38.2	38.2	25.378	0	13.814	48008000	46	21.443	21.9262	21.9359	21.6553	21.9009	20.3642	21.2919	21.2699
Q60714	S27A1_MOUSE	Slc27a1	Long-chain fatty acid transport protein 1		0.247836	0.176873	21	19	19	38.9	35.4	35.4	71.275	0	96.164	140460000	120	22.8529	23.2209	22.8218	23.2755	22.1658	22.2872	22.8345	22.8641
E9Q7B0	E9Q7B0_MOUSE	P4ha1	Procollagen-proline 4-dioxygenase		0	NaN	1	1	1	2.4	2.4	2.4	51.753	0	2.9203	477580	3	NaN	NaN	NaN	NaN	NaN	NaN	NaN	NaN
Q5SX75	Q5SX75_MOUSE	P4ha2	Procollagen-proline 4-dioxygenase		0	NaN	1	1	1	2.6	2.6	2.6	61.014	0	3.7618	324350	1	NaN	NaN	NaN	NaN	NaN	NaN	NaN	NaN
Q60720	CY561_MOUSE	Cyb561	Cytochrome b561		0	NaN	1	1	1	4.4	4.4	4.4	27.821	0.0037161	1.944	2049800	3	NaN	NaN	NaN	NaN	NaN	NaN	NaN	NaN
Q60759	GCDH_MOUSE	Gcdh	Glutaryl-CoA dehydrogenase, mitochondrial		0.778219	0.18475	6	6	6	16	16	16	48.605	0	24.113	20197000	26	21.0576	NaN	20.8411	20.8797	21.2984	21.0141	20.8157	20.9045
Q60766	IRGM1_MOUSE	Irgm1	Immunity-related GTPase family M protein 1		0.0667363	-0.0675735	9	9	9	20	20	20	46.551	0	17.842	35972000	28	NaN	21.6213	NaN	20.6836	20.7248	21.3345	21.1583	20.7397
Q60770	STXB3_MOUSE	Stxbp3	Syntaxin-binding protein 3		0	NaN	8	8	8	15.9	15.9	15.9	67.942	0	26.962	8268500	18	NaN	NaN	NaN	NaN	NaN	19.8111	NaN	19.4183
F7D1J2	F7D1J2_MOUSE	Ripk1	Receptor-interacting serine/threonine-protein kinase 1 (Fragment)		0	NaN	1	1	1	2	2	2	68.027	0	4.9865	346230	2	NaN	NaN	NaN	NaN	NaN	NaN	NaN	NaN
Q60864	STIP1_MOUSE	Stip1	Stress-induced-phosphoprotein 1		0	NaN	6	6	6	11.8	11.8	11.8	62.581	0	14.088	5985100	16	NaN	NaN	NaN	NaN	NaN	19.2839	19.533	19.5953
Q60865	CAPR1_MOUSE	Caprin1	Caprin-1		0	NaN	3	3	3	3.1	3.1	3.1	78.168	0	6.0646	1897800	3	NaN	NaN	NaN	NaN	NaN	NaN	NaN	NaN
Q8BMJ3	IF1AX_MOUSE	Eif1ax	Eukaryotic translation initiation factor 1A, X-chromosomal		0	NaN	2	2	2	14.6	14.6	14.6	16.46	0	3.6081	450070	2	NaN	NaN	NaN	NaN	NaN	NaN	NaN	NaN
A0A1D5RLS1	A0A1D5RLS1_MOUSE	Eps15l1	Epidermal growth factor receptor substrate 15-like 1		0	NaN	8	8	8	15.5	15.5	15.5	66.204	0	54.328	7575400	16	NaN	NaN	NaN	NaN	NaN	18.818	19.3151	19.4987
Q60928	GGT1_MOUSE	Ggt1	Glutathione hydrolase 1 proenzyme		0.179113	-0.079556	9	9	9	17.8	17.8	17.8	61.562	0	35.394	86514000	71	22.0301	22.3516	22.1566	21.7468	21.8581	21.7949	22.327	22.0265
Q60930	VDAC2_MOUSE	Vdac2	Voltage-dependent anion-selective channel protein 2		0.781966	-0.211211	22	22	22	76.3	76.3	76.3	31.732	0	310.4	1773300000	523	25.3455	25.4192	25.5004	25.1876	25.3358	25.6531	25.2008	25.7787
Q60931	VDAC3_MOUSE	Vdac3	Voltage-dependent anion-selective channel protein 3		1.39653	-0.368805	22	22	22	72.8	72.8	72.8	30.752	0	316.49	767890000	321	24.0068	23.9049	24.2817	24.0272	23.9396	24.5433	23.9697	24.559
Q60932	VDAC1_MOUSE	Vdac1	Voltage-dependent anion-selective channel protein 1		0.884352	-0.480811	31	31	31	76	76	76	32.351	0	323.31	2193500000	684	25.2454	25.0945	25.2193	25.1535	25.1699	26.0953	25.1314	26.1405
F7B1B6	F7B1B6_MOUSE	Coq8a	Atypical kinase COQ8A, mitochondrial (Fragment)		0	NaN	1	1	1	2.5	2.5	2.5	45.385	0	6.8535	804540	3	NaN	NaN	NaN	NaN	NaN	NaN	NaN	NaN
Q60972	RBBP4_MOUSE	Rbbp4	Histone-binding protein RBBP4		0	NaN	1	1	1	2.6	2.6	2.6	47.655	0	2.9472	417590	2	NaN	NaN	NaN	NaN	NaN	NaN	NaN	NaN
Q60994	ADIPO_MOUSE	Adipoq	Adiponectin		0.289914	-0.289397	6	6	6	20.6	20.6	20.6	26.809	0	31.753	82347000	59	21.6826	22.1093	22.5659	22.3583	20.8113	21.9111	21.4296	22.2125
Q61009	SCRB1_MOUSE	Scarb1	Scavenger receptor class B member 1		0	NaN	7	7	7	17.5	17.5	17.5	56.753	0	8.2327	26074000	12	NaN	NaN	NaN	NaN	NaN	22.2455	22.3525	22.505
Q61017	GBGT2_MOUSE	Gngt2	Guanine nucleotide-binding protein G(I)/G(S)/G(O) subunit gamma-T2		0	NaN	1	1	1	20.3	20.3	20.3	7.8019	0	3.9439	567900	2	NaN	NaN	NaN	NaN	NaN	NaN	NaN	NaN
Q61024	ASNS_MOUSE	Asns	Asparagine synthetase [glutamine-hydrolyzing]		1.32965	0.292882	13	13	13	28.2	28.2	28.2	64.282	0	54.896	30564000	33	20.9204	21.0484	20.6164	20.8667	NaN	20.7122	20.8454	20.4352
Q61029	LAP2B_MOUSE	Tmpo	Lamina-associated polypeptide 2, isoforms beta/delta/epsilon/gamma		0.0348186	-0.0186105	7	7	7	22.6	22.6	22.6	50.372	0	86.352	19874000	49	19.2765	19.6612	19.4967	19.9159	NaN	19.5125	19.697	19.8397
Q61035	HARS1_MOUSE	Hars1	Histidine--tRNA ligase, cytoplasmic		0	-0.161707	2	2	2	4.3	4.3	4.3	57.432	0	9.6789	5855800	11	19.6496	NaN	NaN	NaN	NaN	NaN	19.8113	NaN
V9GXH2	V9GXH2_MOUSE	Ei24	Etoposide-induced protein 2.4 (Fragment)		0	0.600193	4	4	4	17.2	17.2	17.2	18.868	0	5.8742	13339000	14	NaN	21.0327	20.6539	NaN	NaN	20.3168	20.4574	20.3017
E9Q638	E9Q638_MOUSE	Adam9	Disintegrin and metalloproteinase domain-containing protein 9		0.0454661	-0.0454807	7	7	7	10.1	10.1	10.1	91.848	0	24.488	5184300	20	NaN	18.6559	19.1533	19.1637	NaN	NaN	NaN	18.7573
Q61074	PPM1G_MOUSE	Ppm1g	Protein phosphatase 1G		0	NaN	2	2	2	4.2	4.2	4.2	58.727	0.009329	1.6026	11726000	2	NaN	NaN	NaN	NaN	NaN	NaN	NaN	NaN
Q61081	CDC37_MOUSE	Cdc37	Hsp90 co-chaperone Cdc37		0.841319	0.609595	2	2	2	8.4	8.4	8.4	44.593	0	24.19	8917400	24	19.4896	19.7256	19.6659	19.6904	NaN	18.8306	18.5804	NaN
Q61093	CY24B_MOUSE	Cybb	Cytochrome b-245 heavy chain		0.0153948	-0.0221043	5	5	5	12.3	12.3	12.3	65.304	0	12.18	16560000	28	20.1936	21.3521	20.5434	NaN	20.7442	21.4964	21.1179	19.984
Q61102	ABCB7_MOUSE	Abcb7	ATP-binding cassette sub-family B member 7, mitochondrial		0.0991035	-0.0401993	12	12	12	19.4	19.4	19.4	82.58	0	55.297	34574000	46	20.8435	20.4168	20.6657	20.4703	20.8765	20.9328	20.649	20.5205
E0CZ73	E0CZ73_MOUSE	Ocln	Occludin		0	NaN	1	1	1	4.4	4.4	4.4	31.613	0	2.7581	212400	1	NaN	NaN	NaN	NaN	NaN	NaN	NaN	NaN
Q61165	SL9A1_MOUSE	Slc9a1	Sodium/hydrogen exchanger 1		0	NaN	1	1	1	2.1	2.1	2.1	91.467	0	3.4484	233170	2	NaN	NaN	NaN	NaN	NaN	NaN	NaN	NaN
Q61171	PRDX2_MOUSE	Prdx2	Peroxiredoxin-2		0.221377	0.0831885	12	12	12	70.2	70.2	70.2	21.778	0	34.986	97191000	74	21.6732	21.7124	21.3845	22.0445	21.7262	21.7565	21.9847	21.6978
Q61187	TS101_MOUSE	Tsg101	Tumor susceptibility gene 101 protein		0.2448	-0.212682	6	6	6	14.6	14.6	14.6	44.123	0	18.557	9525600	21	18.6625	NaN	19.1269	19.5273	NaN	19.1053	19.2671	19.7312
D3Z2X5	D3Z2X5_MOUSE	Pafah1b3	Platelet-activating factor acetylhydrolase IB subunit gamma (Fragment)		0	NaN	1	1	1	15.4	15.4	15.4	15.893	0	8.1278	0	1	NaN	NaN	NaN	NaN	NaN	NaN	NaN	NaN
E9PZ00	E9PZ00_MOUSE	Psap	Prosaposin		0.0720896	0.0645402	3	3	3	5.6	5.6	5.6	60.672	0	9.9799	10950000	31	19.9746	19.4416	20.1981	NaN	20.3442	19.6468	NaN	19.722
Q61233	PLSL_MOUSE	Lcp1	Plastin-2		0	NaN	6	6	5	11	11	9.6	70.148	0	14.099	8202000	14	NaN	NaN	NaN	NaN	NaN	19.7565	19.7733	19.2187
Q61235	SNTB2_MOUSE	Sntb2	Beta-2-syntrophin		0	NaN	4	3	3	7.9	6.5	6.5	56.381	0.0040771	1.9309	3961500	5	NaN	NaN	NaN	NaN	NaN	NaN	NaN	NaN
Q5ND35	Q5ND35_MOUSE	Serpinf2	Alpha-2-antiplasmin (Fragment)		0	NaN	1	1	1	3.2	3.2	3.2	31.248	0	3.0715	624050	4	NaN	NaN	NaN	NaN	NaN	NaN	NaN	NaN
Q61249	IGBP1_MOUSE	Igbp1	Immunoglobulin-binding protein 1		0	NaN	1	1	1	3.8	3.8	3.8	38.97	0	7.928	798430	5	NaN	NaN	NaN	NaN	NaN	NaN	NaN	NaN
A0A0R4J0U5	A0A0R4J0U5_MOUSE	Abcd2	ATP-binding cassette sub-family D member 2		0	NaN	7	7	7	9.9	9.9	9.9	83.456	0	16.306	8438100	12	NaN	NaN	NaN	NaN	NaN	NaN	NaN	NaN
E0CXB9	E0CXB9_MOUSE	Ctnna2	Catenin alpha-2		0	NaN	10	1	1	10.2	1.9	1.9	106.73	0	3.3168	7310400	4	NaN	NaN	NaN	NaN	NaN	NaN	NaN	NaN
Q61316	HSP74_MOUSE	Hspa4	Heat shock 70 kDa protein 4		0.12678	-0.0354528	11	9	9	19.3	16.6	16.6	94.132	0	77.054	21276000	39	19.8334	19.4039	19.6907	19.5777	19.4868	19.476	19.6705	19.6065
Q61334	BAP29_MOUSE	Bcap29	B-cell receptor-associated protein 29		0	NaN	6	6	6	23.3	23.3	23.3	27.964	0	9.7114	7393900	13	20.1513	21.0398	NaN	NaN	NaN	NaN	NaN	NaN
Q61335	BAP31_MOUSE	Bcap31	B-cell receptor-associated protein 31		0.52536	0.154718	13	13	13	31	31	31	27.956	0	48.088	443080000	516	24.2917	24.1592	24.1069	24.124	23.9768	23.8094	24.2578	23.7587
Q61387	COX7R_MOUSE	Cox7a2l	Cytochrome c oxidase subunit 7A-related protein, mitochondrial		0	0.260501	2	2	2	18	18	18	12.399	0	6.2005	16974000	15	20.886	NaN	NaN	NaN	NaN	20.8362	20.4553	20.5849
Q61391	NEP_MOUSE	Mme	Neprilysin		0	NaN	4	4	4	6.5	6.5	6.5	85.701	0	9.9454	9647400	11	NaN	NaN	NaN	NaN	NaN	NaN	NaN	NaN
F6R7Y0	F6R7Y0_MOUSE	Slc35a1	CMP-sialic acid transporter (Fragment)		0	NaN	2	2	2	8.4	8.4	8.4	26.734	0	5.8991	4839200	6	NaN	NaN	NaN	NaN	NaN	NaN	NaN	NaN
Q61425	HCDH_MOUSE	Hadh	Hydroxyacyl-coenzyme A dehydrogenase, mitochondrial		0.106616	-0.0549116	14	14	14	36	36	36	34.463	0	45.058	160110000	139	23.3843	23.1547	23.2613	23.2249	23.7526	23.2049	23.8031	23.4668
E9Q731	E9Q731_MOUSE	Cd55b	Complement decay-accelerating factor transmembrane isoform		0	NaN	2	2	2	13.2	13.2	13.2	31.729	0.0086486	1.6293	818410	3	NaN	NaN	NaN	NaN	NaN	NaN	NaN	NaN
Q5SU71	Q5SU71_MOUSE	Trim25	E3 ubiquitin/ISG15 ligase TRIM25		0	NaN	1	1	1	1.9	1.9	1.9	70.753	0.001506	2.102	177880	1	NaN	NaN	NaN	NaN	NaN	NaN	NaN	NaN
Q61542	STAR3_MOUSE	Stard3	StAR-related lipid transfer protein 3		0	NaN	1	1	1	2.9	2.9	2.9	50.469	0.0022497	2.0184	0	1	NaN	NaN	NaN	NaN	NaN	NaN	NaN	NaN
F8WHM5	F8WHM5_MOUSE	Glg1	Golgi apparatus protein 1 (Fragment)		0.529452	0.237579	19	19	19	17.6	17.6	17.6	132.35	0	86.069	128680000	170	22.0401	22.3175	21.6468	21.6869	21.9257	21.3985	22.1653	21.8092
Q5SUT0	Q5SUT0_MOUSE	Ewsr1	RNA-binding protein EWS		0	NaN	1	1	1	2.3	2.3	2.3	64.988	0	4.1076	1063500	2	NaN	NaN	NaN	NaN	NaN	NaN	NaN	NaN
Q61554	FBN1_MOUSE	Fbn1	Fibrillin-1		0.960248	0.338367	95	95	95	39.7	39.7	39.7	312.3	0	323.31	2142100000	1422	24.8982	24.9783	25.0393	24.8558	24.7886	24.2778	24.5401	24.31
Q61559	FCGRN_MOUSE	Fcgrt	IgG receptor FcRn large subunit p51		0	NaN	1	1	1	3.3	3.3	3.3	40.092	0	4.4665	408020	1	NaN	NaN	NaN	NaN	NaN	NaN	NaN	NaN
Q61578	ADRO_MOUSE	Fdxr	NADPH:adrenodoxin oxidoreductase, mitochondrial		0	NaN	1	1	1	2.2	2.2	2.2	54.201	0.004062	1.8985	577200	1	NaN	NaN	NaN	NaN	NaN	NaN	NaN	NaN
Q61585	G0S2_MOUSE	G0s2	G0/G1 switch protein 2		0	NaN	3	3	3	28.2	28.2	28.2	11.118	0	7.9176	3616600	17	NaN	NaN	NaN	NaN	NaN	NaN	NaN	NaN
Q61586	GPAT1_MOUSE	Gpam	Glycerol-3-phosphate acyltransferase 1, mitochondrial		0	NaN	4	4	4	6	6	6	93.703	0	15.333	4908500	5	NaN	NaN	NaN	NaN	NaN	NaN	NaN	NaN
Q61598	GDIB_MOUSE	Gdi2	Rab GDP dissociation inhibitor beta		0.3255	-0.0931726	24	24	20	64.3	64.3	57.3	50.537	0	101.98	195990000	114	22.9256	22.6231	22.6505	22.635	22.6916	22.6993	22.8053	23.0929
D3YWL7	D3YWL7_MOUSE	Arhgdib	Rho GDP-dissociation inhibitor 2 (Fragment)		0	NaN	1	1	1	32	32	32	5.8564	0.0093525	1.6207	328010	1	NaN	NaN	NaN	NaN	NaN	NaN	NaN	NaN
Q61646	HPT_MOUSE	Hp	Haptoglobin		0.117485	0.204283	7	7	7	18.4	18.4	18.4	38.752	0	15.175	17222000	20	NaN	NaN	NaN	20.0155	19.9246	20.1769	20.3086	18.8117
Q61655	DD19A_MOUSE	Ddx19a	ATP-dependent RNA helicase DDX19A		0	NaN	2	2	2	5	5	5	53.932	0	4.5787	681370	5	NaN	NaN	NaN	NaN	NaN	NaN	NaN	NaN
Q61699	HS105_MOUSE	Hsph1	Heat shock protein 105 kDa		0.160544	-0.0668874	12	12	10	15.5	15.5	12.9	96.406	0	39.191	17271000	33	19.555	19.9813	19.6774	19.9143	19.3994	19.6619	19.7793	19.9991
Q61712	DNJC1_MOUSE	Dnajc1	DnaJ homolog subfamily C member 1		0.164036	-0.0942769	15	15	15	31.7	31.7	31.7	63.869	0	51.44	84712000	97	21.0216	21.5872	21.7939	21.1231	21.8143	21.2484	21.5055	21.3756
E9Q6I2	E9Q6I2_MOUSE	Il1rap	Interleukin-1 receptor accessory protein		0	NaN	3	3	3	4.8	4.8	4.8	73.516	0	5.3052	4092300	6	NaN	NaN	NaN	NaN	NaN	NaN	NaN	NaN
Q61733	RT31_MOUSE	Mrps31	28S ribosomal protein S31, mitochondrial		0	NaN	1	1	1	3.4	3.4	3.4	43.88	0	5.676	3763200	6	NaN	NaN	NaN	NaN	NaN	NaN	NaN	NaN
G3X9Q1	G3X9Q1_MOUSE	Itga7	Integrin alpha-7		0	NaN	1	1	1	1.1	1.1	1.1	124.61	0	4.9649	322740	1	NaN	NaN	NaN	NaN	NaN	NaN	NaN	NaN
A0A5F8MPB5	A0A5F8MPB5_MOUSE	Itga6	Integrin alpha-6		1.58679	0.327509	31	31	31	33.2	33.2	33.2	126.72	0	181.2	370390000	248	23.3198	23.414	23.1785	23.4359	23.3261	23.002	23.2422	22.763
Q61753	SERA_MOUSE	Phgdh	D-3-phosphoglycerate dehydrogenase		1.02806	-0.236636	11	11	11	25.9	25.9	25.9	56.585	0	92.95	95772000	70	21.2706	21.0864	21.1758	20.875	21.0594	21.2019	21.3026	21.5577
Q61768	KINH_MOUSE	Kif5b	Kinesin-1 heavy chain		0.751645	-0.252887	10	10	10	11.9	11.9	11.9	109.55	0	78.596	18896000	35	19.8991	NaN	19.9043	19.6039	NaN	20.0658	19.8376	20.2099
Q61781	K1C14_MOUSE	Krt14	Keratin, type I cytoskeletal 14		0.381902	0.0939169	28	25	8	64.9	61.6	26	52.866	0	118.6	287770000	288	22.8154	22.9475	23.0946	23.1125	22.9561	22.9098	22.7142	22.7371
Q61792	LASP1_MOUSE	Lasp1	LIM and SH3 domain protein 1		0	-0.176966	6	6	6	21.3	21.3	21.3	29.994	0	16.828	11398000	24	NaN	NaN	NaN	19.5147	NaN	19.111	20.0845	19.8794
Q61805	LBP_MOUSE	Lbp	Lipopolysaccharide-binding protein		0	0.30645	6	6	6	15.8	15.8	15.8	53.055	0	16.732	15232000	18	21.2331	21.9289	21.2066	21.3773	NaN	NaN	NaN	NaN
Q61830	MRC1_MOUSE	Mrc1	Macrophage mannose receptor 1		0.193836	0.109851	14	14	14	10.5	10.5	10.5	164.98	0	22.368	20104000	29	19.751	20.1048	20.0893	20.5522	20.5106	19.9888	20.4638	19.9372
Q61838	PZP_MOUSE	Pzp	Pregnancy zone protein		0.782949	-0.314927	30	30	30	26.5	26.5	26.5	165.85	0	121.18	205220000	142	21.8446	22.1407	21.9238	21.6594	21.315	22.3054	22.1178	21.8724
Q61878	PRG2_MOUSE	Prg2	Bone marrow proteoglycan		0	NaN	2	2	2	10.8	10.8	10.8	24.255	0	6.5907	26089000	23	NaN	NaN	NaN	NaN	NaN	NaN	NaN	NaN
Q9DAY9	Q9DAY9_MOUSE	Npm1	Nucleophosmin		0	-0.443218	3	3	3	13.6	13.6	13.6	28.385	0	8.4978	4157600	7	19.2018	NaN	NaN	NaN	NaN	19.645	NaN	NaN
Q61941	NNTM_MOUSE	Nnt	NAD(P) transhydrogenase, mitochondrial		0.277584	-0.0775924	37	37	37	38.8	38.8	38.8	113.84	0	184.92	497520000	337	22.9449	22.7112	22.8361	22.8522	22.5126	22.8809	22.6473	22.9669
Q61990	PCBP2_MOUSE	Pcbp2	Poly(rC)-binding protein 2		0	NaN	5	4	4	18	14.9	14.9	38.221	0	13.883	14962000	14	21.3095	21.5145	NaN	21.6218	NaN	NaN	NaN	NaN
Q62000	MIME_MOUSE	Ogn	Mimecan		0	NaN	2	2	2	11.4	11.4	11.4	34.012	0	4.7221	2857000	4	NaN	NaN	NaN	NaN	NaN	NaN	NaN	NaN
Q62009	POSTN_MOUSE	Postn	Periostin		0.388088	-0.112258	8	8	6	12.4	12.4	9.8	93.142	0	21.914	22245000	37	20.2005	20.3135	20.2815	20.1971	20.5735	20.2998	20.6679	20.4844
Q62048	PEA15_MOUSE	Pea15	Astrocytic phosphoprotein PEA-15		0	NaN	1	1	1	7.7	7.7	7.7	15.054	0	18.855	550350	1	NaN	NaN	NaN	NaN	NaN	NaN	NaN	NaN
Q62074	KPCI_MOUSE	Prkci	Protein kinase C iota type		0	NaN	1	1	1	3.2	3.2	3.2	68.203	0.0079422	1.6469	774420	1	NaN	NaN	NaN	NaN	NaN	NaN	NaN	NaN
Q62086	PON2_MOUSE	Pon2	Serum paraoxonase/arylesterase 2		0.18485	-0.100444	5	5	5	16.4	16.4	16.4	39.617	0	11.214	16494000	22	20.8587	20.3636	20.9654	20.9284	20.7546	NaN	20.6881	NaN
Q62087	PON3_MOUSE	Pon3	Serum paraoxonase/lactonase 3		0.579004	0.398953	11	11	11	40.7	40.7	40.7	39.351	0	120.53	109360000	90	22.2016	22.4087	22.4291	22.1959	22.8826	21.6228	22.5769	21.4643
Q62159	RHOC_MOUSE	Rhoc	Rho-related GTP-binding protein RhoC		0	NaN	10	1	1	56.5	6.2	6.2	22.006	0	5.4228	13209000	9	NaN	NaN	NaN	NaN	NaN	NaN	NaN	NaN
Q62165	DAG1_MOUSE	Dag1	Dystroglycan		0	NaN	2	2	2	2.7	2.7	2.7	96.904	0	4.8503	11960000	7	NaN	NaN	NaN	NaN	NaN	NaN	NaN	NaN
Q62167	DDX3X_MOUSE	Ddx3x	ATP-dependent RNA helicase DDX3X		0.473208	-0.175353	17	17	4	28.9	28.9	6.9	73.101	0	99.379	72154000	116	21.1752	21.567	21.2561	21.5892	21.2561	21.4631	21.8053	21.7644
Q62186	SSRD_MOUSE	Ssr4	Translocon-associated protein subunit delta		0.913988	-0.330779	10	10	10	61.6	61.6	61.6	18.936	0	71.681	2593300000	773	26.5462	26.5591	26.6385	26.6054	26.9867	27.2863	26.8806	27.2151
Q62261	SPTB2_MOUSE	Sptbn1	Spectrin beta chain, non-erythrocytic 1		1.39081	-0.182045	86	86	81	42.1	42.1	39.8	274.22	0	323.31	456610000	422	21.7862	21.9083	22.0958	21.6846	21.8099	21.9033	22.0408	21.8774
Q62264	THRSP_MOUSE	Thrsp	Thyroid hormone-inducible hepatic protein		0.0850898	0.0581532	5	5	5	42.7	42.7	42.7	17.093	0	127.37	38452000	38	21.8451	21.1953	21.5476	21.4128	NaN	21.0566	21.3104	21.7904
Q62273	S26A2_MOUSE	Slc26a2	Sulfate transporter		0	NaN	2	2	2	3.9	3.9	3.9	81.603	0	3.1712	2618200	5	NaN	NaN	NaN	NaN	NaN	NaN	NaN	NaN
Q62312	TGFR2_MOUSE	Tgfbr2	TGF-beta receptor type-2		0	NaN	1	1	1	1.5	1.5	1.5	67.121	0.0011325	2.1499	1305900	4	NaN	NaN	NaN	NaN	NaN	NaN	NaN	NaN
Q62313	TGON1_MOUSE	Tgoln1	Trans-Golgi network integral membrane protein 1		1.16258	-0.464841	8	8	8	29.2	29.2	29.2	37.848	0	33.494	35489000	103	20.0262	20.0193	20.235	20.2574	19.9169	21.0981	20.3086	20.4375
Q62348	TSN_MOUSE	Tsn	Translin		0	NaN	3	3	3	19.7	19.7	19.7	26.201	0	4.8097	7599400	10	NaN	NaN	NaN	NaN	NaN	20.6148	NaN	20.8207
Q62351	TFR1_MOUSE	Tfrc	Transferrin receptor protein 1		1.39076	-0.304534	49	49	49	60.9	60.9	60.9	85.73	0	323.31	2624700000	1131	24.3813	24.2926	24.9611	24.3147	24.4588	24.4828	24.508	24.7135
D3Z637	D3Z637_MOUSE	Tpd52	Tumor protein D52		2.24565	-0.923318	7	7	7	40.1	40.1	40.1	17.603	0	41.992	35915000	43	20.8995	20.9164	21.2238	20.6492	20.4758	21.4702	21.8552	22.0851
E9QNA7	E9QNA7_MOUSE	Sorbs1	Sorbin and SH3 domain-containing protein 1		0	NaN	3	3	3	5.5	5.5	5.5	82.874	0	6.3431	956590	4	NaN	NaN	NaN	NaN	NaN	NaN	NaN	NaN
Q62418	DBNL_MOUSE	Dbnl	Drebrin-like protein		0	NaN	7	7	7	21.3	21.3	21.3	48.699	0	32.13	5383200	18	NaN	NaN	NaN	NaN	NaN	NaN	NaN	NaN
Q62419	SH3G1_MOUSE	Sh3gl1	Endophilin-A2		0	NaN	1	1	1	4.3	4.3	4.3	41.518	0.009667	1.5721	208260	1	NaN	NaN	NaN	NaN	NaN	NaN	NaN	NaN
Q62425	NDUA4_MOUSE	Ndufa4	Cytochrome c oxidase subunit NDUFA4		1.17663	0.294328	10	10	10	86.6	86.6	86.6	9.3267	0	30.279	1680700000	358	26.1264	26.1546	26.0547	26.4784	26.0983	25.8474	25.6795	26.0987
Q62426	CYTB_MOUSE	Cstb	Cystatin-B		0	0.189874	4	4	4	45.9	45.9	45.9	11.045	0	6.4356	38210000	24	22.5298	NaN	22.3541	NaN	NaN	21.5068	22.9117	22.587
Q62433	NDRG1_MOUSE	Ndrg1	Protein NDRG1		1.97682	-0.217422	14	14	14	55.3	55.3	55.3	43.008	0	103.52	467600000	265	23.0415	23.0264	23.0839	22.8599	22.9677	23.2517	23.1617	23.2679
Q62446	FKBP3_MOUSE	Fkbp3	Peptidyl-prolyl cis-trans isomerase FKBP3		0	NaN	1	1	1	4.9	4.9	4.9	25.147	0	4.0064	214480	1	NaN	NaN	NaN	NaN	NaN	NaN	NaN	NaN
Q62465	VAT1_MOUSE	Vat1	Synaptic vesicle membrane protein VAT-1 homolog		0.0493587	-0.0382131	7	7	7	25.4	25.4	25.4	43.096	0	25.935	26025000	26	20.918	21.4227	NaN	20.8552	NaN	21.2998	20.7121	21.2986
Q62470	ITA3_MOUSE	Itga3	Integrin alpha-3		0	NaN	3	3	3	3.1	3.1	3.1	116.74	0	10.507	1282200	9	NaN	NaN	NaN	NaN	NaN	NaN	NaN	NaN
Q62556	BT1A1_MOUSE	Btn1a1	Butyrophilin subfamily 1 member A1		1.75716	-0.461145	27	27	27	44.8	44.8	44.8	58.406	0	239.71	1551400000	625	24.9743	24.5564	25.0125	24.4227	24.8458	25.1766	25.1361	25.3186
Q63918	CAVN2_MOUSE	Cavin2	Caveolae-associated protein 2		0.897059	-0.16925	11	11	11	28.7	28.7	28.7	46.763	0	33.328	33545000	85	20.4785	20.3666	20.7363	20.5915	20.2895	20.6081	20.4097	20.649
Q8JZR2	Q8JZR2_MOUSE	Crk	Adapter molecule crk		0	NaN	1	1	1	14.7	14.7	14.7	22.889	0	4.4211	2077300	4	NaN	NaN	NaN	NaN	NaN	NaN	NaN	NaN
Q640L3	CCPG1_MOUSE	Ccpg1	Cell cycle progression protein 1		0	NaN	3	3	3	3.9	3.9	3.9	86.125	0	3.5188	1434300	4	NaN	NaN	NaN	NaN	NaN	NaN	NaN	NaN
G3UXX3	G3UXX3_MOUSE	Spr	Sepiapterin reductase		0	NaN	2	2	2	11.9	11.9	11.9	23.357	0	5.168	806550	2	NaN	NaN	NaN	NaN	NaN	NaN	NaN	NaN
Q64133	AOFA_MOUSE	Maoa	Amine oxidase [flavin-containing] A		1.32545	0.27808	13	13	13	28.9	28.9	28.9	59.601	0	52.418	109260000	89	21.8514	21.7033	21.4386	21.6549	22.0015	21.6763	21.6397	21.3441
Q64152	BTF3_MOUSE	Btf3	Transcription factor BTF3		0	NaN	1	1	1	9.3	9.3	9.3	22.031	0	2.9231	10002000	10	NaN	NaN	NaN	NaN	NaN	NaN	NaN	NaN
E9Q4Q2	E9Q4Q2_MOUSE	Sf1	Splicing factor 1		0	NaN	2	2	2	4.2	4.2	4.2	59.698	0	3.0896	538420	4	NaN	NaN	NaN	NaN	NaN	NaN	NaN	NaN
A0A087WNS9	A0A087WNS9_MOUSE	Ly6e	Lymphocyte antigen 6E (Fragment)		0	NaN	1	1	1	22.2	22.2	22.2	6.9541	0	3.8267	1074100	1	NaN	NaN	NaN	NaN	NaN	NaN	NaN	NaN
Q64285	CEL_MOUSE	Cel	Bile salt-activated lipase		2.08801	0.78883	9	9	9	17	17	17	65.812	0	40.768	33179000	35	NaN	21.0085	20.2984	21.012	20.7832	19.9981	20.4727	19.8137
Q64310	SURF4_MOUSE	Surf4	Surfeit locus protein 4		1.15294	0.660715	5	5	5	21.6	21.6	21.6	30.381	0	117.76	820670000	370	26.9054	26.6875	26.7821	26.9997	26.6565	25.8609	26.4618	25.5015
Q64314	CD34_MOUSE	Cd34	Hematopoietic progenitor cell antigen CD34		0	0.171225	2	2	2	5	5	5	40.982	0	5.2399	3337500	7	NaN	20.083	19.9118	NaN	NaN	NaN	NaN	NaN
Q64324	STXB2_MOUSE	Stxbp2	Syntaxin-binding protein 2		0.707148	0.610977	3	3	3	6.2	6.2	6.2	66.357	0	8.303	9775400	15	NaN	20.9382	20.5876	20.4698	NaN	19.9276	19.7639	NaN
D3YZJ1	D3YZJ1_MOUSE	Sqstm1	Sequestosome-1		0	NaN	3	3	3	15.7	15.7	15.7	41.683	0	4.4044	22979000	11	NaN	NaN	NaN	NaN	NaN	NaN	NaN	NaN
Q64433	CH10_MOUSE	Hspe1	10 kDa heat shock protein, mitochondrial		0.220785	-0.123818	8	8	8	67.6	67.6	67.6	10.963	0	19.95	442300000	126	24.6968	24.766	24.4745	24.5905	25.2753	25.2188	25.0232	25.1074
Q64435	UD16_MOUSE	Ugt1a6	UDP-glucuronosyltransferase 1-6		0	NaN	3	3	3	5.5	5.5	5.5	60.438	0	4.6282	7608800	9	NaN	NaN	NaN	NaN	NaN	20.4164	20.7216	20.5881
A2AWF8	A2AWF8_MOUSE	Ptprj	Protein-tyrosine-phosphatase		0	NaN	2	2	2	1.8	1.8	1.8	128.71	0	6.0228	1445800	4	NaN	NaN	NaN	NaN	NaN	18.9924	NaN	18.5879
Q64462	CP4B1_MOUSE	Cyp4b1	Cytochrome P450 4B1		0	NaN	4	4	4	11	11	11	58.9	0	3.3428	3970500	11	NaN	NaN	NaN	NaN	NaN	20.4038	19.6478	19.5437
Q05DJ9	Q05DJ9_MOUSE	Tpp2	Tpp2 protein		0	NaN	3	3	3	7.1	7.1	7.1	65.553	0	11.764	2497700	3	NaN	NaN	NaN	NaN	NaN	NaN	NaN	NaN
B1ASZ3	B1ASZ3_MOUSE	Gk	Glycerol kinase		0.147899	-0.0606971	18	18	18	36.6	36.6	36.6	59.832	0	56.277	105980000	148	21.8527	21.7735	21.6358	21.4664	21.7129	21.9557	21.4505	22.0062
B1ATS4	B1ATS4_MOUSE	Atp2a3	Calcium-transporting ATPase		0	0.260546	14	2	2	12.6	2.3	2.3	107.6	0	28.543	87325000	38	NaN	23.4191	NaN	22.9307	24.729	NaN	23.4324	NaN
Q64521	GPDM_MOUSE	Gpd2	Glycerol-3-phosphate dehydrogenase, mitochondrial		0.25025	0.141339	36	36	36	56.5	56.5	56.5	80.953	0	161.07	386430000	304	22.8458	23.2805	23.1137	23.044	22.3788	22.5244	22.7065	22.6391
Q64523	H2A2C_MOUSE	H2ac20	Histone H2A type 2-C		0.792791	-0.510294	5	5	1	35.7	35.7	8.5	13.988	0	42.582	165620000	60	24.4772	23.3358	23.7426	23.5248	23.512	24.3446	24.1652	24.6385
Q64674	SPEE_MOUSE	Srm	Spermidine synthase		0.630725	0.320248	9	9	9	38.1	38.1	38.1	33.995	0	14.198	35930000	30	21.9771	22.4958	NaN	21.8395	21.8128	21.4865	21.5981	22.0485
Q64685	SIAT1_MOUSE	St6gal1	Beta-galactoside alpha-2,6-sialyltransferase 1		3.71172	-0.381643	15	15	15	36.7	36.7	36.7	46.585	0	81.975	419270000	285	23.5318	23.7027	24.0317	23.6977	23.6021	24.0193	23.9497	24.0603
Q64704	STX3_MOUSE	Stx3	Syntaxin-3		0	NaN	2	2	2	7.3	7.3	7.3	33.243	0.0015066	2.1055	914260	3	NaN	NaN	NaN	NaN	NaN	NaN	NaN	NaN
Q64727	VINC_MOUSE	Vcl	Vinculin		1.44795	-0.726351	22	22	22	23	23	23	116.72	0	57.598	38261000	55	19.8057	19.6576	20.8991	20.3915	19.3214	20.4375	20.1772	20.5679
Q9D5H8	Q9D5H8_MOUSE	Tgfbr1	Receptor protein serine/threonine kinase		0	NaN	1	1	1	3.6	3.6	3.6	47.575	0	3.145	467260	1	NaN	NaN	NaN	NaN	NaN	NaN	NaN	NaN
A0A0A6YVT1	A0A0A6YVT1_MOUSE	Cr1l	Complement component receptor 1-like protein (Fragment)		1.42204	-0.804513	6	6	6	28.2	28.2	28.2	28.522	0	20.031	60429000	67	21.4033	21.7931	22.0863	21.305	21.6784	22.9486	21.7013	22.6618
Q64FW2	RETST_MOUSE	Retsat	All-trans-retinol 13,14-reductase		0	-0.0678724	8	8	8	18.6	18.6	18.6	67.334	0	31.3	15179000	17	NaN	20.5119	20.7268	20.7771	20.6879	NaN	NaN	NaN
Q5SXR6	Q5SXR6_MOUSE	Cltc	Clathrin heavy chain		1.0838	-0.168406	101	101	101	61.4	61.4	61.4	191.98	0	323.31	2536200000	1222	24.5848	24.4895	24.6852	24.3643	24.346	24.4651	24.7255	24.5825
F6RJ64	F6RJ64_MOUSE	Fnip1	Folliculin-interacting protein 1 (Fragment)		0	NaN	1	1	1	2.7	2.7	2.7	70.685	0.0037175	1.9446	2327600	2	NaN	NaN	NaN	NaN	NaN	NaN	NaN	NaN
F8WGT1	F8WGT1_MOUSE	Ahcyl2	Putative adenosylhomocysteinase 3		1.36746	-0.459114	6	6	1	10	10	1.1	66.771	0	12.66	9691800	13	NaN	19.5607	19.9708	19.6418	NaN	NaN	20.1499	NaN
E9QB02	E9QB02_MOUSE	Mars1	Methionine--tRNA ligase, cytoplasmic		1.37531	-0.673235	15	15	15	23.8	23.8	23.8	102.37	0	70.06	72288000	59	21.6348	22.0394	21.8408	21.312	21.2804	22.1678	22.7677	22.1832
E9Q390	E9Q390_MOUSE	Myof	Myoferlin		0.728128	0.0932169	78	78	76	42	42	40.9	233.32	0	223.83	608670000	480	23.2215	23.1907	23.2529	23.2359	23.3914	23.1311	23.061	23.2216
Q6A0A2	LAR4B_MOUSE	Larp4b	La-related protein 4B		0	NaN	7	7	7	10.9	10.9	10.9	81.626	0	12.956	7317300	15	NaN	NaN	NaN	NaN	NaN	NaN	NaN	NaN
Q6A0A9	F120A_MOUSE	FAM120A	Constitutive coactivator of PPAR-gamma-like protein 1		0	NaN	5	5	5	6.7	6.7	6.7	121.64	0	18.292	3272500	11	NaN	NaN	NaN	NaN	NaN	18.1737	NaN	18.5502
Q6DID7	WLS_MOUSE	Wls	Protein wntless homolog		0	-0.459391	7	7	7	10.4	10.4	10.4	62.188	0	6.7889	11925000	26	NaN	NaN	19.3614	19.076	18.7279	NaN	NaN	NaN
Q6DVA0	LEMD2_MOUSE	Lemd2	LEM domain-containing protein 2		0	NaN	3	3	3	6.8	6.8	6.8	57.506	0	7.6041	6360300	12	NaN	NaN	NaN	NaN	NaN	NaN	NaN	NaN
Q6DYE8	ENPP3_MOUSE	Enpp3	Ectonucleotide pyrophosphatase/phosphodiesterase family member 3		0.379057	0.5881	4	4	4	8	8	8	98.661	0	9.8526	13546000	15	20.8185	21.5642	20.6662	NaN	NaN	19.5415	20.6806	21.5246
Q6GQT9	NOMO1_MOUSE	Nomo1	Nodal modulator 1		0.12351	-0.0202684	46	46	46	46.8	46.8	46.8	133.42	0	323.31	522840000	397	22.8995	22.8722	23.0877	22.9308	22.9617	22.9053	22.9455	22.8068
Q6GV12	KDSR_MOUSE	Kdsr	3-ketodihydrosphingosine reductase		1.04393	-0.466074	5	5	5	20.8	20.8	20.8	35.955	0	26.909	73276000	54	21.8398	21.921	22.0634	21.36	21.1188	22.3012	21.6799	22.0593
Q6IRU2	TPM4_MOUSE	Tpm4	Tropomyosin alpha-4 chain		0	NaN	2	2	2	11.3	11.3	11.3	28.467	0	5.941	2924600	4	NaN	NaN	NaN	NaN	NaN	NaN	NaN	NaN
Q6IRU5	CLCB_MOUSE	Cltb	Clathrin light chain B		0.108553	-0.0683079	6	6	6	21.4	21.4	21.4	25.171	0	13.136	28445000	38	20.0929	20.8496	20.5271	20.181	20.1883	20.5936	20.5241	19.9402
A0A087WPR9	A0A087WPR9_MOUSE	Retreg2	Reticulophagy regulator 2 (Fragment)		0	NaN	2	2	2	4.5	4.5	4.5	52.011	0	6.889	2301400	6	NaN	NaN	NaN	NaN	NaN	NaN	NaN	NaN
Q6NSQ9	G6PC3_MOUSE	G6pc3	Glucose-6-phosphatase 3		0	NaN	1	1	1	6.1	6.1	6.1	38.781	0	6.6629	2950000	2	NaN	NaN	NaN	NaN	NaN	NaN	NaN	NaN
Q6NVD0	FREM2_MOUSE	Frem2	FRAS1-related extracellular matrix protein 2		0	NaN	1	1	1	0.4	0.4	0.4	350.64	0.0011442	2.2958	129710000	7	NaN	NaN	NaN	NaN	NaN	NaN	NaN	NaN
D6RIK6	D6RIK6_MOUSE	Tsga10	Testis-specific gene 10 protein		0	NaN	2	2	2	10.6	10.6	10.6	30.124	0.007249	1.7074	77925000	12	NaN	NaN	NaN	NaN	NaN	24.0885	22.1243	22.0924
G3X928	G3X928_MOUSE	Sec23ip	SEC23-interacting protein		0	NaN	2	2	2	2.2	2.2	2.2	110.76	0	2.8493	1604700	5	NaN	NaN	NaN	NaN	NaN	NaN	NaN	NaN
A0A0J9YUS5	A0A0J9YUS5_MOUSE	Eif4g1	Eukaryotic translation initiation factor 4 gamma 1		0.499447	-0.277221	12	12	12	12.6	12.6	12.6	145.31	0	86.913	25689000	51	19.7751	19.4758	19.895	20.0725	NaN	19.6538	20.4234	20.2346
Q6P069	SORCN_MOUSE	Sri	Sorcin		0	0.337578	3	3	3	17.2	17.2	17.2	21.627	0	7.3729	9182000	11	19.9438	20.4389	19.8538	NaN	NaN	NaN	NaN	NaN
B0QZM1	B0QZM1_MOUSE	Ube2j2	Ubiquitin-conjugating enzyme E2 J2		0	NaN	2	2	2	14.7	14.7	14.7	25.848	0	5.6804	2199200	3	NaN	NaN	NaN	NaN	NaN	NaN	NaN	NaN
Q6P1H6	ANKL2_MOUSE	Ankle2	Ankyrin repeat and LEM domain-containing protein 2		0	NaN	1	1	1	1.8	1.8	1.8	106.2	0.0044248	1.8894	132740	1	NaN	NaN	NaN	NaN	NaN	NaN	NaN	NaN
Q6P3A8	ODBB_MOUSE	Bckdhb	2-oxoisovalerate dehydrogenase subunit beta, mitochondrial		0	NaN	4	4	4	18.5	18.5	18.5	42.88	0	9.6152	5257400	5	NaN	NaN	NaN	NaN	NaN	19.4626	20.3692	NaN
Q6P5E4	UGGG1_MOUSE	Uggt1	UDP-glucose:glycoprotein glucosyltransferase 1		0.56	-0.0694089	62	62	62	49.5	49.5	49.5	176.43	0	323.31	940260000	528	23.8184	23.9261	23.9798	23.7384	23.9146	23.9869	23.8488	23.8597
A0A087WRC8	A0A087WRC8_MOUSE	Slc39a10	Zinc transporter ZIP10 (Fragment)		0	NaN	1	1	1	6.9	6.9	6.9	16.869	0	3.5715	544480	2	NaN	NaN	NaN	NaN	NaN	NaN	NaN	NaN
Q6P5F9	XPO1_MOUSE	Xpo1	Exportin-1		0	NaN	2	2	2	2.5	2.5	2.5	123.09	0	5.9874	766010	3	NaN	NaN	NaN	NaN	NaN	NaN	NaN	NaN
Q6P6J9	TXD15_MOUSE	Txndc15	Thioredoxin domain-containing protein 15		0	NaN	1	1	1	6.1	6.1	6.1	38.146	0.00038595	2.47	1663400	1	NaN	NaN	NaN	NaN	NaN	NaN	NaN	NaN
Q6P6M5	PX11C_MOUSE	Pex11g	Peroxisomal membrane protein 11C		0	NaN	1	1	1	5	5	5	27.151	0	4.7956	1416600	3	NaN	NaN	NaN	NaN	NaN	NaN	NaN	NaN
Q6P8H8	ALG8_MOUSE	Alg8	Probable dolichyl pyrophosphate Glc1Man9GlcNAc2 alpha-1,3-glucosyltransferase		0	NaN	2	2	2	4.4	4.4	4.4	59.534	0.00479	1.8789	5316100	6	NaN	NaN	NaN	NaN	NaN	NaN	NaN	NaN
Q6P9J9	ANO6_MOUSE	Ano6	Anoctamin-6		0	NaN	3	3	3	4.9	4.9	4.9	106.25	0	31.63	1305000	3	NaN	NaN	NaN	NaN	NaN	NaN	NaN	NaN
Q6P9R2	OXSR1_MOUSE	Oxsr1	Serine/threonine-protein kinase OSR1		0	NaN	2	2	2	4.6	4.6	4.6	58.213	0	2.9421	773170	2	NaN	NaN	NaN	NaN	NaN	NaN	NaN	NaN
Q6P9S7	GLT10_MOUSE	Galnt10	Polypeptide N-acetylgalactosaminyltransferase 10		0	NaN	2	2	2	3.2	3.2	3.2	69.115	0.0040605	1.8968	1437900	8	NaN	NaN	NaN	NaN	NaN	NaN	NaN	NaN
Q6PA06	ATLA2_MOUSE	Atl2	Atlastin-2		0.207885	0.0863733	18	18	17	37	37	35.2	66.223	0	153.29	142390000	102	21.2919	21.8862	21.7486	21.9168	21.544	21.5774	21.5681	21.3994
Q6PB66	LPPRC_MOUSE	Lrpprc	Leucine-rich PPR motif-containing protein, mitochondrial		0.509186	0.185626	12	12	12	9.1	9.1	9.1	156.61	0	39.001	34196000	32	21.9631	21.9042	21.6192	NaN	22.1376	22.0952	NaN	21.7336
Q6PB93	GALT2_MOUSE	Galnt2	Polypeptide N-acetylgalactosaminyltransferase 2		0	NaN	3	3	3	8.1	8.1	8.1	64.514	0.0022438	1.9933	2573400	5	NaN	NaN	NaN	NaN	NaN	NaN	NaN	NaN
F7CTF8	F7CTF8_MOUSE	Mff	Mitochondrial fission factor (Fragment)		1.45168	-0.646986	3	3	3	15.9	15.9	15.9	24.791	0	4.6616	8423600	18	18.7476	NaN	19.0201	18.787	NaN	19.5611	19.6387	19.4372
Q6PCX9	TRI37_MOUSE	Trim37	E3 ubiquitin-protein ligase TRIM37		0	NaN	1	1	1	1.1	1.1	1.1	107.66	0.0015038	2.068	546060	1	NaN	NaN	NaN	NaN	NaN	NaN	NaN	NaN
Q6PD26	PIGS_MOUSE	Pigs	GPI transamidase component PIG-S		0.171852	-0.0812254	9	9	9	20.7	20.7	20.7	61.71	0	23.572	53451000	45	21.9955	22.6462	22.5415	21.9829	22.2823	22.0835	22.3592	22.2476
A0A1L1STF0	A0A1L1STF0_MOUSE	Mindy2	Ubiquitinyl hydrolase 1		0	NaN	2	2	2	4.8	4.8	4.8	65.508	0	8.7381	635290	4	NaN	NaN	NaN	NaN	NaN	NaN	NaN	NaN
A0A1D5RMC1	A0A1D5RMC1_MOUSE	Dync1li2	Dynein light intermediate chain (Fragment)		0	NaN	1	1	1	3	3	3	45.24	0	3.9058	844010	6	NaN	NaN	NaN	NaN	NaN	NaN	NaN	NaN
H7BX95	H7BX95_MOUSE	Srsf1	Serine/arginine-rich splicing factor 1		0	0.930563	8	8	8	31.6	31.6	31.6	28.329	0	11.06	7859100	16	19.3651	NaN	18.6851	NaN	NaN	18.8717	NaN	17.7467
A0A0N4SV74	A0A0N4SV74_MOUSE	Washc2	WASH complex subunit 2 (Fragment)		0	NaN	1	1	1	1.4	1.4	1.4	98.534	0.0011477	2.3452	0	1	NaN	NaN	NaN	NaN	NaN	NaN	NaN	NaN
Q6PHN9	RAB35_MOUSE	Rab35	Ras-related protein Rab-35		0	NaN	5	4	4	28.4	23.4	23.4	23.025	0	8.6974	3282600	9	NaN	NaN	NaN	NaN	NaN	NaN	NaN	NaN
Q6PHU5	SORT_MOUSE	Sort1	Sortilin		1.0684	-0.428028	18	18	18	28.5	28.5	28.5	91.199	0	53.329	159700000	98	22.3652	21.9611	22.0699	21.7038	21.5975	22.2067	22.4786	22.5845
A0A0G2JGS4	A0A0G2JGS4_MOUSE	Camk2d	Calcium/calmodulin-dependent protein kinase		0.248839	-0.2339	9	9	9	19.7	19.7	19.7	60.003	0	77.608	24219000	28	19.6322	NaN	19.3218	20.037	19.7197	19.9549	20.8245	20.0196
Q6PIC6	AT1A3_MOUSE	Atp1a3	Sodium/potassium-transporting ATPase subunit alpha-3		0	NaN	15	1	1	17.4	1.3	1.3	111.69	0	3.3844	831530	2	NaN	NaN	NaN	NaN	NaN	NaN	NaN	NaN
D3YYN7	D3YYN7_MOUSE	Atp1a2	Sodium/potassium-transporting ATPase subunit alpha		0	0.740696	20	5	4	23.8	5.9	4.8	103.58	0	9.9815	5520400	11	NaN	21.1403	NaN	NaN	NaN	20.4448	20.342	20.4121
F7AAP4	F7AAP4_MOUSE	Atp2b4	Calcium-transporting ATPase		0	-0.636093	13	5	5	13.7	5.8	5.8	128.56	0	21.18	7317000	15	NaN	19.0321	19.6682	NaN	NaN	NaN	NaN	NaN
Q6QD59	SEC20_MOUSE	Bnip1	Vesicle transport protein SEC20		0.144988	-0.0646143	11	11	11	39	39	39	26.175	0	44.762	54604000	52	21.3336	21.023	21.1486	21.2453	20.6433	21.0895	20.9618	21.304
Q6RUT7	CSMT1_MOUSE	Ccsmst1	Protein CCSMST1		0	NaN	1	1	1	12.5	12.5	12.5	15.348	0	21.085	2283600	7	NaN	NaN	NaN	NaN	NaN	NaN	NaN	NaN
Q6TEK5	VKORL_MOUSE	Vkorc1l1	Vitamin K epoxide reductase complex subunit 1-like protein 1		0	NaN	4	4	4	20.5	20.5	20.5	19.778	0	8.4011	20160000	15	NaN	NaN	21.7019	NaN	NaN	21.1572	21.6983	21.7541
Q6URW6	MYH14_MOUSE	Myh14	Myosin-14		0	NaN	11	3	3	4.8	1.3	1.3	228.58	0	8.111	56085000	14	NaN	NaN	NaN	NaN	NaN	22.384	22.6832	NaN
Q6VNB8	WDFY3_MOUSE	Wdfy3	WD repeat and FYVE domain-containing protein 3		0	NaN	3	3	3	1.3	1.3	1.3	392.33	0.0082943	1.6317	2537700	4	NaN	NaN	NaN	NaN	NaN	NaN	NaN	NaN
Q6ZQ38	CAND1_MOUSE	Cand1	Cullin-associated NEDD8-dissociated protein 1		0	NaN	7	7	7	8	8	8	136.33	0	16.711	6147100	9	NaN	NaN	NaN	NaN	NaN	NaN	NaN	NaN
Q6ZQ58	LARP1_MOUSE	Larp1	La-related protein 1		0.553718	0.671252	23	23	23	28.3	28.3	28.3	121.12	0	79.772	90669000	96	22.7299	20.7816	21.6042	22.4973	22.3597	21.9664	20.3972	21.7158
Q6ZQI3	MLEC_MOUSE	Mlec	Malectin		0.974693	0.24316	26	26	26	58.4	58.4	58.4	32.342	0	323.31	1085900000	401	24.4333	24.3931	24.523	24.5299	24.8097	24.1204	24.3352	24.2146
Q6ZQK5	ACAP2_MOUSE	Acap2	Arf-GAP with coiled-coil, ANK repeat and PH domain-containing protein 2		0	NaN	1	1	1	1.4	1.4	1.4	87.21	0	3.1506	1886800	3	NaN	NaN	NaN	NaN	NaN	NaN	NaN	NaN
Q6ZWN5	RS9_MOUSE	Rps9	40S ribosomal protein S9		0.0283879	0.0107589	26	26	26	61.9	61.9	61.9	22.591	0	66.495	3644900000	689	26.1518	25.9577	25.8169	26.2355	26.1895	26.339	26.2502	26.0854
Q6ZWQ7	SPCS3_MOUSE	Spcs3	Signal peptidase complex subunit 3		0.160264	-0.0301008	12	12	12	37.8	37.8	37.8	20.313	0	40.898	481350000	146	24.5181	24.2677	24.3327	24.3655	24.3939	24.5571	24.3542	24.4216
A0A0G2JDW7	A0A0G2JDW7_MOUSE	Rps27	40S ribosomal protein S27 (Fragment)		0.0442997	-0.028831	9	3	3	47.6	15.9	15.9	9.2327	0	9.4212	441090000	115	24.3533	24.1427	23.7161	24.0404	23.9956	23.9027	24.6309	24.3977
Q6ZWV3	RL10_MOUSE	Rpl10	60S ribosomal protein L10		0.496648	-0.260187	17	17	17	60.7	60.7	60.7	24.604	0	89.44	1074100000	656	23.778	24.258	23.8341	24.1353	23.8052	24.4566	24.7334	23.9931
Q6ZWV7	RL35_MOUSE	Rpl35	60S ribosomal protein L35		0.45725	-0.332463	9	7	7	35	34.1	34.1	14.552	0	18.019	828410000	145	25.2691	26.1089	25.9251	26.0803	25.4478	26.3403	26.5417	25.4288
Q6ZWX6	IF2A_MOUSE	Eif2s1	Eukaryotic translation initiation factor 2 subunit 1		0	NaN	3	3	3	11.1	11.1	11.1	36.108	0	8.7728	81065000	12	NaN	NaN	NaN	NaN	NaN	24.2933	NaN	24.3172
Q6ZWY3	RS27L_MOUSE	Rps27l	40S ribosomal protein S27-like		0.423781	-0.16969	9	9	3	46.4	46.4	15.5	9.4771	0	35.227	1308000000	454	25.0854	24.7889	25.1038	25.1431	24.9857	25.3675	24.748	25.4625
Q6ZWY8	TYB10_MOUSE	Tmsb10	Thymosin beta-10		0	NaN	1	1	1	31.8	31.8	31.8	5.0256	0	2.6537	2411800	3	NaN	NaN	NaN	NaN	NaN	NaN	NaN	NaN
E9QQ10	E9QQ10_MOUSE	Akap9	A-kinase anchor protein 9		0	NaN	1	1	1	0.3	0.3	0.3	434.13	0.0011377	2.2247	259680	1	NaN	NaN	NaN	NaN	NaN	NaN	NaN	NaN
Q70IV5	SYNEM_MOUSE	Synm	Synemin		0	-0.562609	6	6	6	4.2	4.2	4.2	173.21	0	10.192	4736300	15	18.4166	NaN	NaN	NaN	NaN	18.468	NaN	19.4904
Q71FD5	ZNRF2_MOUSE	Znrf2	E3 ubiquitin-protein ligase ZNRF2		0	NaN	2	2	2	14.7	14.7	14.7	23.705	0	11.189	1745100	6	NaN	NaN	NaN	NaN	NaN	NaN	NaN	NaN
Q71KT5	ERG24_MOUSE	Tm7sf2	Delta(14)-sterol reductase TM7SF2		0.289765	-0.211208	6	6	6	12.4	12.4	12.4	46.52	0	9.3408	32793000	34	21.2989	19.9428	21.2127	20.9071	20.8516	20.7291	20.9099	20.9935
Q71RI9	KAT3_MOUSE	Kyat3	Kynurenine--oxoglutarate transaminase 3		0	NaN	3	3	3	7.3	7.3	7.3	51.126	0.0011398	2.2511	5621700	5	NaN	NaN	NaN	NaN	NaN	NaN	NaN	NaN
Q76MZ3	2AAA_MOUSE	Ppp2r1a	Serine/threonine-protein phosphatase 2A 65 kDa regulatory subunit A alpha isoform		0.833623	-0.383713	14	14	14	30.2	30.2	30.2	65.322	0	34.471	62766000	59	21.5698	21.8169	21.3945	21.1665	21.5311	22.286	21.9122	22.0264
Q78IK2	ATPMD_MOUSE	Atp5md	ATP synthase membrane subunit DAPIT, mitochondrial		0.0616634	0.0381866	4	4	4	44.8	44.8	44.8	6.3814	0	66.085	553940000	160	24.6245	24.0502	24.2984	24.5001	24.5776	24.6233	23.9503	24.7278
Q78IK4	MIC27_MOUSE	Apool	MICOS complex subunit Mic27		0.259989	0.0911002	10	10	10	42.6	42.6	42.6	29.26	0	37.999	134350000	83	22.4624	22.1947	22.3174	22.3731	22.1553	22.2994	21.8362	22.3682
Q78IS1	TMED3_MOUSE	Tmed3	Transmembrane emp24 domain-containing protein 3		0.470759	0.0891805	12	12	12	48.9	48.9	48.9	25.465	0	49.305	843770000	364	25.4476	25.3022	25.4026	25.2856	25.5094	25.1278	25.2572	25.4004
Q78PY7	SND1_MOUSE	Snd1	Staphylococcal nuclease domain-containing protein 1		0.0980246	-0.0225215	48	48	48	61.1	61.1	61.1	102.09	0	288.97	615120000	397	22.6079	22.5258	22.4941	22.3772	22.3344	22.516	22.5933	22.332
Q78T54	VMA21_MOUSE	Vma21	Vacuolar ATPase assembly integral membrane protein Vma21		0	NaN	1	1	1	11.9	11.9	11.9	11.365	0.0011355	2.1921	14663000	15	NaN	NaN	NaN	NaN	NaN	NaN	NaN	NaN
Q78XF5	OSTC_MOUSE	Ostc	Oligosaccharyltransferase complex subunit OSTC		0	NaN	1	1	1	8.1	8.1	8.1	16.815	0	5.1456	136000000	20	NaN	NaN	NaN	NaN	NaN	NaN	NaN	NaN
Q78ZA7	NP1L4_MOUSE	Nap1l4	Nucleosome assembly protein 1-like 4		0	NaN	3	3	3	10.7	10.7	10.7	42.679	0	7.3245	2368300	7	NaN	NaN	NaN	NaN	NaN	NaN	NaN	NaN
Q791T5	MTCH1_MOUSE	Mtch1	Mitochondrial carrier homolog 1		0	1.05387	7	7	7	20.8	20.8	20.8	41.565	0	14.648	14346000	32	20.7351	NaN	NaN	21.5713	21.5052	NaN	20.2167	NaN
Q791V5	MTCH2_MOUSE	Mtch2	Mitochondrial carrier homolog 2		0.888666	0.15561	13	13	13	49.8	49.8	49.8	33.499	0	54.716	860340000	283	25.1248	25.0676	24.7993	25.0399	24.8095	24.9937	24.7405	24.8859
Q7TMB8	CYFP1_MOUSE	Cyfip1	Cytoplasmic FMR1-interacting protein 1		0.861463	-0.199949	12	12	12	11.2	11.2	11.2	145.24	0	26.692	17256000	44	19.9356	20.2784	20.2482	19.9845	19.9369	20.2629	20.4124	20.0118
A0A0R4J275	A0A0R4J275_MOUSE	Ndufa12	NADH dehydrogenase [ubiquinone] 1 alpha subcomplex subunit 12		0.741874	0.322194	13	13	13	75.2	75.2	75.2	17.633	0	67.626	273600000	270	22.8245	22.709	22.9302	22.701	23.031	22.6208	21.9792	22.4466
G3UZI2	G3UZI2_MOUSE	Syncrip	Heterogeneous nuclear ribonucleoprotein Q		0	-0.122505	6	6	6	13.7	13.7	13.7	58.751	0	26.566	12447000	21	NaN	NaN	NaN	19.5561	NaN	20.1001	18.6949	20.241
Q7TMM9	TBB2A_MOUSE	Tubb2a	Tubulin beta-2A chain		0	-0.319251	22	5	4	59.6	14.4	11.7	49.906	0	16.96	26602000	22	NaN	NaN	21.2194	20.9402	NaN	21.366	21.0445	21.4078
S4R2E1	S4R2E1_MOUSE	Abcg2	ATP-binding cassette sub-family G member 2		0.295269	-0.0499659	17	17	17	38.9	38.9	38.9	63.607	0	59.489	506470000	202	23.9043	23.8326	23.8231	23.6452	23.9102	23.8047	23.9287	23.9356
A0A1B0GS49	A0A1B0GS49_MOUSE	Trpm4	Transient receptor potential cation channel subfamily M member 4		0	NaN	2	2	2	2.6	2.6	2.6	119.75	0	2.8354	2781100	2	NaN	NaN	NaN	NaN	NaN	NaN	NaN	NaN
E9Q715	E9Q715_MOUSE	Luc7l2	Putative RNA-binding protein Luc7-like 2		0	NaN	1	1	1	5.5	5.5	5.5	32.646	0	5.8089	0	1	NaN	NaN	NaN	NaN	NaN	NaN	NaN	NaN
Q7TPQ3	SHPRH_MOUSE	Shprh	E3 ubiquitin-protein ligase SHPRH		0	NaN	1	1	1	0.8	0.8	0.8	191.49	0.0069041	1.7354	31609000	28	NaN	NaN	NaN	NaN	NaN	NaN	NaN	NaN
A1BN54	A1BN54_MOUSE	Actn1	Alpha-actinin cytoskeletal isoform		0.650951	-0.268455	35	12	11	41.6	17.7	16	102.72	0	77.435	35820000	44	19.9493	19.5779	20.3516	20.4681	19.9938	20.3639	20.0409	20.3066
Q7TQ48	SRCA_MOUSE	Srl	Sarcalumenin		0	NaN	6	6	6	11.4	11.4	11.4	54.286	0	12.148	3671500	7	NaN	NaN	NaN	NaN	NaN	NaN	NaN	NaN
Q7TQ95	LNP_MOUSE	Lnpk	Endoplasmic reticulum junction formation protein lunapark		0.061504	0.0129352	10	10	10	31.3	31.3	31.3	47.499	0	35.289	43312000	67	20.4269	20.7713	20.6236	20.6385	20.6741	20.6424	20.6277	20.5652
Q7TQE6	MACOI_MOUSE	Maco1	Macoilin		0	NaN	3	3	3	5.3	5.3	5.3	76.088	0	6.5467	2849300	7	NaN	NaN	NaN	NaN	NaN	NaN	NaN	NaN
A0A087WRB7	A0A087WRB7_MOUSE	Plekha6	Pleckstrin homology domain-containing family A member 6		0	NaN	2	2	2	2.4	2.4	2.4	117.1	0	3.831	1727200	3	NaN	NaN	NaN	NaN	NaN	17.8983	NaN	18.2157
D3YWF6	D3YWF6_MOUSE	Otub1	Ubiquitinyl hydrolase 1		0	NaN	2	2	2	7.9	7.9	7.9	28.036	0.0072622	1.7277	2340400	3	NaN	NaN	NaN	NaN	NaN	NaN	NaN	NaN
A0A0J9YU98	A0A0J9YU98_MOUSE	Zar1	Zygote arrest protein 1 (Fragment)		0	NaN	1	1	1	4.9	4.9	4.9	22.048	0.0072648	1.7277	6733100	9	NaN	NaN	NaN	NaN	NaN	NaN	NaN	NaN
F6ZBL2	F6ZBL2_MOUSE	Mib1	RING-type E3 ubiquitin transferase (Fragment)		0	NaN	1	1	1	2.3	2.3	2.3	69.637	0.0069192	1.7537	173190	1	NaN	NaN	NaN	NaN	NaN	NaN	NaN	NaN
Q80SZ7	GBG5_MOUSE	Gng5	Guanine nucleotide-binding protein G(I)/G(S)/G(O) subunit gamma-5		0.218598	-0.180779	4	4	4	48.5	48.5	48.5	7.3184	0	11.026	56716000	94	21.3891	20.5336	21.6497	21.9495	21.6856	21.2135	21.7713	21.6463
Q80TA1	EPT1_MOUSE	Selenoi	Ethanolaminephosphotransferase 1		0	NaN	2	2	2	7	7	7	45.345	0	10.8	9067200	10	NaN	NaN	NaN	NaN	NaN	NaN	NaN	NaN
B2RUJ2	B2RUJ2_MOUSE	Erbin	Erbb2ip protein		0	-0.0522003	5	5	5	4.7	4.7	4.7	145.09	0	35.319	15088000	19	NaN	NaN	20.3144	20.2606	NaN	20.3011	20.6647	19.9711
Q80TM9	NISCH_MOUSE	Nisch	Nischarin		0	NaN	2	2	2	1.6	1.6	1.6	175.01	0	3.3608	4982000	3	NaN	NaN	NaN	NaN	NaN	NaN	NaN	NaN
Q80TN4	DJC16_MOUSE	Dnajc16	DnaJ homolog subfamily C member 16		0	0.108098	4	4	4	6.9	6.9	6.9	89.135	0	18.967	8030300	16	NaN	NaN	18.8809	19.1816	NaN	19.0544	NaN	19.2851
Q80U63	MFN2_MOUSE	Mfn2	Mitofusin-2		0	NaN	4	4	4	7.4	7.4	7.4	86.187	0	19.23	3579100	15	NaN	NaN	NaN	NaN	NaN	NaN	NaN	NaN
Q80U72	SCRIB_MOUSE	Scrib	Protein scribble homolog		0	NaN	5	5	5	3.3	3.3	3.3	174.06	0	20.056	3427600	13	NaN	NaN	NaN	NaN	NaN	NaN	19.0406	18.7753
A2A6U5	A2A6U5_MOUSE	Septin9	Septin-9 (Fragment)		0	NaN	2	2	2	7	7	7	27.598	0	4.0542	1614900	5	NaN	NaN	NaN	NaN	NaN	NaN	NaN	NaN
Q80UM7	MOGS_MOUSE	Mogs	Mannosyl-oligosaccharide glucosidase		0.266096	-0.0663447	28	28	28	39.3	39.3	39.3	91.83	0	204.01	409070000	203	23.3693	23.4401	23.4183	23.6461	23.6938	23.6178	23.7289	23.6498
Q80UU9	PGRC2_MOUSE	Pgrmc2	Membrane-associated progesterone receptor component 2		0.021502	-0.00740719	10	10	9	53.9	53.9	49.8	23.334	0	75.335	167030000	94	23.6263	23.6091	23.55	23.4702	23.1909	23.5081	23.3045	23.5635
Q80V26	IMPA3_MOUSE	Bpnt2	Golgi-resident adenosine 3,5-bisphosphate 3-phosphatase		0	NaN	3	3	3	14.9	14.9	14.9	38.616	0	8.1574	9038400	10	NaN	NaN	NaN	NaN	NaN	NaN	NaN	NaN
Q80VA0	GALT7_MOUSE	Galnt7	N-acetylgalactosaminyltransferase 7		0	NaN	4	4	4	5.3	5.3	5.3	75.418	0.0033557	1.9573	3890000	7	NaN	NaN	NaN	NaN	NaN	NaN	NaN	NaN
A0A0G2JFP5	A0A0G2JFP5_MOUSE	Tdrkh	Tudor and KH domain-containing protein		0	NaN	1	1	1	8.6	8.6	8.6	16.007	0	5.4609	1118600	5	NaN	NaN	NaN	NaN	NaN	NaN	NaN	NaN
Q80W54	FACE1_MOUSE	Zmpste24	CAAX prenyl protease 1 homolog		1.54066	-0.819151	12	12	12	26.5	26.5	26.5	54.734	0	28.348	59199000	50	20.982	20.5342	21.0739	20.1887	NaN	21.5148	21.1852	21.7761
Q80WG5	LRC8A_MOUSE	Lrrc8a	Volume-regulated anion channel subunit LRRC8A		0	NaN	1	1	1	2.2	2.2	2.2	94.118	0.0026168	1.9821	1378700	2	NaN	NaN	NaN	NaN	NaN	NaN	NaN	NaN
Q80WJ7	LYRIC_MOUSE	Mtdh	Protein LYRIC		0.374653	0.10034	30	30	10	54.1	54.1	24.2	63.845	0	298.07	519760000	422	23.7775	23.3898	23.5362	23.499	23.312	23.3602	23.2651	23.4153
A0A1D5RLY2	A0A1D5RLY2_MOUSE	Vac14	Protein VAC14 homolog		0	NaN	1	1	1	2.8	2.8	2.8	51.483	0	4.9753	2018500	6	NaN	NaN	NaN	NaN	NaN	NaN	NaN	NaN
Q80WW9	DDRGK_MOUSE	Ddrgk1	DDRGK domain-containing protein 1		0.212167	-0.106982	6	6	6	30.2	30.2	30.2	35.977	0	73.063	110480000	100	22.3304	22.5168	22.0423	22.2891	22.5044	22.5767	22.4721	22.9776
B7ZNH7	B7ZNH7_MOUSE	Col14a1	Collagen alpha-1(XIV) chain		0	NaN	1	1	1	0.7	0.7	0.7	192.75	0	5.4281	1217800	3	NaN	NaN	NaN	NaN	NaN	NaN	NaN	NaN
D3Z191	D3Z191_MOUSE	Tmem106b	Transmembrane protein 106B (Fragment)		0	0.633785	4	4	4	26.5	26.5	26.5	20.738	0	10.195	5842400	49	NaN	NaN	NaN	19.2366	19.5724	NaN	18.7707	NaN
Q80X80	C2C2L_MOUSE	C2cd2l	Phospholipid transfer protein C2CD2L		0	NaN	4	4	4	5.8	5.8	5.8	76.328	0	8.7346	3648600	9	NaN	NaN	NaN	NaN	NaN	17.9089	18.4574	18.4232
Q80X85	RT07_MOUSE	Mrps7	28S ribosomal protein S7, mitochondrial		0	NaN	3	3	3	11.2	11.2	11.2	28.062	0	5.4288	895580	5	NaN	NaN	NaN	NaN	NaN	NaN	NaN	NaN
Q80X90	FLNB_MOUSE	Flnb	Filamin-B		0.0932346	0.0269198	88	80	77	45.4	43.4	41.8	277.82	0	323.31	435110000	406	22.799	22.9042	22.8338	22.8252	22.5752	22.6415	22.9253	22.5955
Q80X95	RRAGA_MOUSE	Rraga	Ras-related GTP-binding protein A		0	NaN	5	5	5	17.6	17.6	17.6	36.566	0	13.568	8072200	9	NaN	NaN	NaN	NaN	NaN	19.8539	NaN	20.1269
A0A0R4J0I6	A0A0R4J0I6_MOUSE	Acad11	Acyl-CoA dehydrogenase family member 11		0.541729	0.220164	10	10	10	15.7	15.7	15.7	87.347	0	56.342	25151000	38	21.043	21.2774	21.0674	21.0733	20.6535	20.4649	20.9565	20.6777
Q80XN0	BDH_MOUSE	Bdh1	D-beta-hydroxybutyrate dehydrogenase, mitochondrial		0.0860812	0.0225196	23	23	23	62.1	62.1	62.1	38.299	0	223.49	1039700000	394	25.1916	24.9173	24.9931	24.787	24.8402	24.9067	24.8481	24.8982
Q8BMS7	Q8BMS7_MOUSE	Atp2c1	Calcium-transporting ATPase		0.248613	-0.114198	17	16	16	30.9	28.3	28.3	72.329	0	67.715	73894000	63	20.8917	20.829	20.5604	20.5613	21.1274	21.0243	21.0205	21.261
A0A1Y7VN70	A0A1Y7VN70_MOUSE	Glrx5	Glutaredoxin-related protein 5, mitochondrial		0	NaN	1	1	1	11.9	11.9	11.9	12.168	0	15.362	4988900	6	NaN	NaN	NaN	NaN	NaN	NaN	NaN	NaN
B1ATP7	B1ATP7_MOUSE	Elac2	ElaC homolog protein 2		0	NaN	3	3	3	5.8	5.8	5.8	91.946	0	2.904	3390300	3	NaN	NaN	NaN	NaN	NaN	NaN	NaN	NaN
Q80YD3	F205C_MOUSE	Fam205c	Protein FAM205C		0	NaN	1	1	1	4	4	4	41.486	0.008996	1.6227	10129000	7	NaN	NaN	NaN	NaN	NaN	NaN	NaN	NaN
Q80YT7	MYOME_MOUSE	Pde4dip	Myomegalin		0	NaN	4	4	4	1.9	1.9	1.9	250.63	0	3.7002	5055900	5	NaN	NaN	NaN	NaN	NaN	NaN	NaN	NaN
Q80YW5	BSPRY_MOUSE	Bspry	B box and SPRY domain-containing protein		0	NaN	5	5	5	11.8	11.8	11.8	52.75	0	11.781	6018900	20	NaN	NaN	NaN	NaN	NaN	18.7525	19.7086	19.9852
Q80YX1	TENA_MOUSE	Tnc	Tenascin		0	NaN	2	2	2	0.9	0.9	0.9	231.8	0.00038986	2.5886	928340	2	NaN	NaN	NaN	NaN	NaN	NaN	NaN	NaN
Q80Z38	SHAN2_MOUSE	Shank2	SH3 and multiple ankyrin repeat domains protein 2		0	NaN	5	5	5	3.7	3.7	3.7	158.97	0	9.2622	1959500	8	NaN	NaN	NaN	NaN	NaN	NaN	NaN	NaN
Q80ZJ8	EFC4A_MOUSE	Cracr2b	EF-hand calcium-binding domain-containing protein 4A		0.357264	-0.22478	7	7	7	19.8	19.8	19.8	44.437	0	17.71	17366000	36	19.702	19.6212	19.4497	NaN	19.9234	19.8806	20.496	20.0683
Q80ZS3	RT26_MOUSE	Mrps26	28S ribosomal protein S26, mitochondrial		0.382535	-0.321775	2	2	2	10.5	10.5	10.5	23.443	0	6.7818	6872100	8	19.2483	NaN	NaN	NaN	18.8624	19.1281	NaN	19.6261
Q810B6	ANFY1_MOUSE	Ankfy1	Rabankyrin-5		0	NaN	1	1	1	0.9	0.9	0.9	128.65	0	2.7494	1505400	6	NaN	NaN	NaN	NaN	NaN	NaN	NaN	NaN
H7BWY4	H7BWY4_MOUSE	Dlg1	Disks large homolog 1		2.20334	-2.25743	14	14	14	23.4	23.4	23.4	96.891	0	50.011	50646000	59	19.178	19.0397	21.0078	20.0834	NaN	21.2721	22.5898	21.8947
Q811U4	MFN1_MOUSE	Mfn1	Mitofusin-1		0.293709	0.257533	7	7	7	11.7	11.7	11.7	83.725	0	32.01	12891000	37	19.7319	19.2146	19.8991	20.3101	19.5962	NaN	19.5569	18.911
Q8BFP9	PDK1_MOUSE	Pdk1	[Pyruvate dehydrogenase (acetyl-transferring)] kinase isozyme 1, mitochondrial		0	NaN	3	3	3	7.1	7.1	7.1	48.994	0	6.5213	2903200	5	NaN	NaN	NaN	NaN	NaN	NaN	NaN	NaN
Q8BFR5	EFTU_MOUSE	Tufm	Elongation factor Tu, mitochondrial		0.40749	0.0806494	22	22	22	53.1	53.1	53.1	49.508	0	79.347	258040000	191	22.4679	22.0936	22.1736	22.2958	22.3776	22.1615	22.2992	22.2779
Q8BFY9	TNPO1_MOUSE	Tnpo1	Transportin-1		0	NaN	2	2	2	3.3	3.3	3.3	102.36	0	3.9955	591730	3	NaN	NaN	NaN	NaN	NaN	NaN	NaN	NaN
Q8BFZ3	ACTBL_MOUSE	Actbl2	Beta-actin-like protein 2		0	NaN	11	2	2	33.2	8	8	42.004	0	4.9648	1375300000	34	25.6673	NaN	NaN	NaN	27.1515	NaN	NaN	NaN
Q8BFZ9	ERLN2_MOUSE	Erlin2	Erlin-2		0.314447	0.0493836	20	20	17	56.8	56.8	51.2	37.872	0	111.29	400500000	214	22.8865	22.8679	22.9136	23.0218	22.8441	22.7616	22.7716	22.976
Q8BG05	ROA3_MOUSE	Hnrnpa3	Heterogeneous nuclear ribonucleoprotein A3		0	NaN	4	4	4	17.2	17.2	17.2	39.652	0	10.795	6500800	9	NaN	NaN	NaN	NaN	NaN	18.5969	NaN	18.9472
A6PWX1	A6PWX1_MOUSE	Cacfd1	Calcium channel flower homolog		0	NaN	1	1	1	8.3	8.3	8.3	12.045	0.003357	1.9582	4910600	14	NaN	NaN	NaN	NaN	NaN	NaN	NaN	NaN
Q8BG32	PSD11_MOUSE	Psmd11	26S proteasome non-ATPase regulatory subunit 11		0.0845563	0.0960584	11	11	9	30.6	30.6	22.7	47.436	0	37.647	20420000	24	20.2618	20.5661	20.0794	NaN	NaN	19.8544	21.0558	20.2818
Q8BG51	MIRO1_MOUSE	Rhot1	Mitochondrial Rho GTPase 1		0.0602286	-0.0215058	4	4	4	6.5	6.5	6.5	72.241	0	5.8418	12255000	17	20.4245	20.0625	20.4555	20.1408	20.5292	20.3584	20.1956	20.2335
A0A1D5RLL3	A0A1D5RLL3_MOUSE	Efr3a	Protein EFR3 homolog A		0	NaN	3	3	3	4	4	4	95.684	0	9.3141	2085600	4	NaN	NaN	NaN	NaN	NaN	NaN	NaN	NaN
Q8BGA9	OXA1L_MOUSE	Oxa1l	Mitochondrial inner membrane protein OXA1L		0.0269308	0.0129118	3	3	3	6.7	6.7	6.7	48.219	0	6.5519	16160000	11	20.51	20.2175	NaN	NaN	NaN	20.3907	NaN	20.311
Q8BGC4	PTGR3_MOUSE	Zadh2	Prostaglandin reductase-3		0	NaN	1	1	1	4	4	4	40.528	0	2.7069	1706000	4	NaN	NaN	NaN	NaN	NaN	NaN	NaN	NaN
Q8BGD8	COA6_MOUSE	Coa6	Cytochrome c oxidase assembly factor 6 homolog		0	NaN	2	2	2	30.4	30.4	30.4	9.2983	0	9.1552	3447900	7	NaN	NaN	NaN	NaN	NaN	NaN	19.0669	19.5875
Q8BGD9	IF4B_MOUSE	Eif4b	Eukaryotic translation initiation factor 4B		0	NaN	5	5	5	11.8	11.8	11.8	68.839	0	8.9819	1735100	8	NaN	NaN	NaN	NaN	NaN	NaN	NaN	NaN
A0A1B0GRZ8	A0A1B0GRZ8_MOUSE	Elmod2	ELMO domain-containing protein 2 (Fragment)		0	NaN	2	2	2	10.6	10.6	10.6	22.345	0	5.1863	757980	2	NaN	NaN	NaN	NaN	NaN	NaN	NaN	NaN
Q8BGH2	SAM50_MOUSE	Samm50	Sorting and assembly machinery component 50 homolog		0.0714207	-0.0254102	16	16	16	37.7	37.7	37.7	51.863	0	40.471	89601000	76	22.4153	22.5586	22.7317	22.7292	22.2553	22.3897	22.4191	22.5195
Q8BGQ7	SYAC_MOUSE	Aars1	Alanine--tRNA ligase, cytoplasmic		0	-0.422657	6	6	6	7.9	7.9	7.9	106.91	0	16.673	8230300	14	NaN	NaN	NaN	NaN	19.382	19.7131	NaN	19.8962
Q8BGR2	LRC8D_MOUSE	Lrrc8d	Volume-regulated anion channel subunit LRRC8D		0	0.0176907	4	4	4	6.1	6.1	6.1	98.112	0	4.3171	6902400	17	NaN	19.7096	19.692	NaN	NaN	NaN	NaN	NaN
A0A0A6YXR0	A0A0A6YXR0_MOUSE	Cept1	Choline/ethanolaminephosphotransferase 1 (Fragment)		0.189569	-0.225327	3	3	3	18.2	18.2	18.2	27.005	0	7.4223	106450000	26	24.6702	23.5212	24.7677	NaN	NaN	23.885	24.4794	24.152
Q8BGT5	ALAT2_MOUSE	Gpt2	Alanine aminotransferase 2		0.112	0.0684675	4	4	4	10.7	10.7	10.7	57.943	0	20.892	10758000	13	21.0519	20.7297	20.7047	20.4071	NaN	20.9739	20.6574	20.3084
Q8BGX0	TRI23_MOUSE	Trim23	E3 ubiquitin-protein ligase TRIM23		0	NaN	1	1	1	1.7	1.7	1.7	63.931	0.00038971	2.587	644560	1	NaN	NaN	NaN	NaN	NaN	NaN	NaN	NaN
Q8BGX2	TIM29_MOUSE	Timm29	Mitochondrial import inner membrane translocase subunit Tim29		0.108163	-0.0491123	7	7	7	27.4	27.4	27.4	29.415	0	43.285	15142000	25	20.1989	19.7154	19.9128	20.1641	19.5862	19.8497	20.1408	19.9577
Q8BGY7	F210A_MOUSE	Fam210a	Protein FAM210A		0	NaN	2	2	2	8.4	8.4	8.4	31.599	0	3.7491	2312300	11	NaN	NaN	NaN	NaN	NaN	NaN	NaN	NaN
A0A2I3BQL9	A0A2I3BQL9_MOUSE	Pck2	Phosphoenolpyruvate carboxykinase (GTP) (Fragment)		0	NaN	6	6	6	12.9	12.9	12.9	65.936	0	14.739	8191500	17	NaN	NaN	NaN	19.6051	20.5787	NaN	NaN	NaN
Q8BH24	TM9S4_MOUSE	Tm9sf4	Transmembrane 9 superfamily member 4		0.356864	0.178263	13	13	13	21.9	21.9	21.9	74.692	0	65.792	157250000	106	22.5718	22.7067	23.0131	22.7827	22.3745	22.2146	22.3105	22.1844
Q8BH43	WASF2_MOUSE	Wasf2	Wiskott-Aldrich syndrome protein family member 2		0	NaN	3	3	3	5.2	5.2	5.2	54.073	0	11.355	3008800	7	NaN	NaN	NaN	NaN	NaN	NaN	NaN	NaN
A0A338P6J4	A0A338P6J4_MOUSE	Sec22a	Vesicle-trafficking protein SEC22a		0	NaN	1	1	1	10.5	10.5	10.5	20.688	0.0040696	1.9141	937070	1	NaN	NaN	NaN	NaN	NaN	NaN	NaN	NaN
Q8BH59	CMC1_MOUSE	Slc25a12	Calcium-binding mitochondrial carrier protein Aralar1		1.66731	0.217882	30	30	25	48.9	48.9	43	74.569	0	107.35	327810000	220	22.7451	22.7883	22.7413	22.7833	22.8933	22.4419	22.5407	22.6147
Q8BH61	F13A_MOUSE	F13a1	Coagulation factor XIII A chain		0	NaN	2	2	2	3.3	3.3	3.3	83.206	0	4.5484	1811100	6	NaN	NaN	NaN	NaN	NaN	NaN	NaN	NaN
Q8BH64	EHD2_MOUSE	Ehd2	EH domain-containing protein 2		0.507752	-0.305898	15	15	13	32	32	28.4	61.174	0	48.751	29854000	31	21.2153	21.3262	21.9659	NaN	NaN	21.1771	21.7455	21.4182
Q8BH73	QPCTL_MOUSE	Qpctl	Glutaminyl-peptide cyclotransferase-like protein		0.12836	-0.0611108	6	6	6	15.4	15.4	15.4	42.691	0	12.365	19603000	25	20.8246	20.4342	20.6691	20.7056	NaN	20.9421	20.3819	20.8706
Q8BH79	ANO10_MOUSE	Ano10	Anoctamin-10		0.670388	0.172359	11	11	11	22	22	22	76.187	0	109.08	77239000	52	22.5881	22.2777	22.364	22.4511	22.5721	22.1554	22.1229	22.5573
Q8BH95	ECHM_MOUSE	Echs1	Enoyl-CoA hydratase, mitochondrial		0.182846	-0.0799851	11	11	11	39.3	39.3	39.3	31.474	0	87.816	262670000	137	22.9814	22.8256	22.7146	22.4212	23.1329	22.969	22.9205	23.077
Q8BHC4	DCAKD_MOUSE	Dcakd	Dephospho-CoA kinase domain-containing protein		0.342933	0.259148	6	6	6	29.4	29.4	29.4	26.476	0	8.7436	32887000	26	20.9508	21.3838	21.9165	21.3938	21.5583	20.5571	20.9587	20.8178
Q8BHC7	RHBL4_MOUSE	Rhbdd1	Rhomboid-related protein 4		0	NaN	1	1	1	5.4	5.4	5.4	35.776	0	156.3	5716100	13	NaN	NaN	NaN	NaN	NaN	NaN	NaN	NaN
Q8BHD0	RB39A_MOUSE	Rab39a	Ras-related protein Rab-39A		0	NaN	2	1	1	6	6	6	24.977	0	6.4873	22465000	14	NaN	NaN	NaN	NaN	NaN	22.4544	NaN	22.6069
Q8BHE8	MAIP1_MOUSE	Maip1	m-AAA protease-interacting protein 1, mitochondrial		0	NaN	2	2	2	7.9	7.9	7.9	32.985	0	2.8643	4476200	3	NaN	NaN	NaN	NaN	NaN	NaN	NaN	NaN
Q8BHF7	PGPS1_MOUSE	Pgs1	CDP-diacylglycerol--glycerol-3-phosphate 3-phosphatidyltransferase, mitochondrial		0	NaN	4	4	4	9.8	9.8	9.8	62.488	0	11.839	5803800	8	20.2769	NaN	NaN	20.0621	NaN	NaN	NaN	NaN
Q8BHI7	ELOV5_MOUSE	Elovl5	Elongation of very long chain fatty acids protein 5		0.16775	-0.151948	6	6	6	23.1	23.1	23.1	35.332	0	17.348	425120000	119	26.0636	25.0277	25.84	25.2891	25.3812	25.1131	26.2417	25.1746
Q8BHN3	GANAB_MOUSE	Ganab	Neutral alpha-glucosidase AB		0.00907562	0.00230551	41	41	41	53.7	53.7	53.7	106.91	0	226.56	666830000	437	23.7517	23.668	23.8671	23.547	23.8283	23.5822	23.6706	23.6659
Q8BHY3	ANO1_MOUSE	Ano1	Anoctamin-1		0	NaN	4	4	4	3.8	3.8	3.8	110.91	0	6.0363	5174800	8	NaN	NaN	NaN	NaN	NaN	NaN	NaN	NaN
D6RH84	D6RH84_MOUSE	Snx14	Sorting nexin-14		0	NaN	1	1	1	7.1	7.1	7.1	21.352	0	5.6958	275330	2	NaN	NaN	NaN	NaN	NaN	NaN	NaN	NaN
Q8BI84	TGO1_MOUSE	Mia3	Transport and Golgi organization protein 1 homolog		0.0154626	-0.0021019	92	92	54	49	49	32.8	213.67	0	323.31	1250600000	920	23.6809	23.8095	23.7102	23.7138	23.635	23.7427	23.6357	23.759
I7HJQ8	I7HJQ8_MOUSE	Cd99l2	CD99 antigen-like protein 2		0	NaN	2	2	2	17.4	17.4	17.4	20.092	0	18.094	2126300	8	NaN	NaN	NaN	NaN	NaN	NaN	18.259	18.7424
H3BJ37	H3BJ37_MOUSE	Comtd1	Catechol O-methyltransferase domain-containing protein 1		0	NaN	1	1	1	6	6	6	22.215	0	5.0073	1595600	4	NaN	NaN	NaN	NaN	NaN	NaN	NaN	NaN
Q8BIJ6	SYIM_MOUSE	Iars2	Isoleucine--tRNA ligase, mitochondrial		1.69417	0.453162	5	5	5	6.6	6.6	6.6	112.8	0	9.9327	7654000	12	19.9931	NaN	19.5692	NaN	20.1102	NaN	19.6278	NaN
Q8BJ03	COX15_MOUSE	Cox15	Cytochrome c oxidase assembly protein COX15 homolog		0	NaN	1	1	1	3.4	3.4	3.4	45.852	0	3.1339	7962600	3	NaN	NaN	NaN	NaN	NaN	NaN	NaN	NaN
Q8BJ48	NAGPA_MOUSE	Nagpa	N-acetylglucosamine-1-phosphodiester alpha-N-acetylglucosaminidase		0	NaN	2	2	2	4.8	4.8	4.8	56.043	0	9.4851	458210	2	NaN	NaN	NaN	NaN	NaN	NaN	NaN	NaN
Q8BJ64	CHDH_MOUSE	Chdh	Choline dehydrogenase, mitochondrial		0.685453	-0.289211	10	10	10	21.6	21.6	21.6	66.414	0	37.848	49687000	63	21.1972	20.619	20.7297	20.3761	20.5765	21.1749	20.9012	21.1199
Q8BJE2	BTNL9_MOUSE	Btnl9	Butyrophilin-like protein 9		0	NaN	1	1	1	1.9	1.9	1.9	60.548	0.0011464	2.3312	477640	1	NaN	NaN	NaN	NaN	NaN	NaN	NaN	NaN
A0A338P7L8	A0A338P7L8_MOUSE	Chmp2b	Charged multivesicular body protein 2b		0	NaN	1	1	1	4.8	4.8	4.8	23.528	0	3.5324	2046600	4	NaN	NaN	NaN	NaN	NaN	NaN	NaN	NaN
D3Z0J8	D3Z0J8_MOUSE	Smarcal1	SWI/SNF-related matrix-associated actin-dependent regulator of chromatin subfamily A-like protein 1 (Fragment)		0	NaN	3	3	3	32.7	32.7	32.7	10.611	0.0022531	2.0476	19340000	7	NaN	NaN	NaN	NaN	NaN	NaN	NaN	NaN
Q8BJM5	ZNT6_MOUSE	Slc30a6	Zinc transporter 6		0	NaN	2	2	2	6.1	6.1	6.1	51.026	0	6.5484	7656300	9	21.4831	21.3319	NaN	21.4857	NaN	NaN	NaN	NaN
F6VNP0	F6VNP0_MOUSE	Tyw1	S-adenosyl-L-methionine-dependent tRNA 4-demethylwyosine synthase TYW1 (Fragment)		0	NaN	2	2	2	11.1	11.1	11.1	25.659	0.0003873	2.5149	904160	2	NaN	NaN	NaN	NaN	NaN	NaN	NaN	NaN
Q8BJS4	SUN2_MOUSE	Sun2	SUN domain-containing protein 2		0	NaN	3	3	3	6.8	6.8	6.8	81.604	0	13.524	7385000	16	NaN	NaN	NaN	NaN	NaN	NaN	NaN	NaN
A0A1W2P7I5	A0A1W2P7I5_MOUSE	Sgta	Small glutamine-rich tetratricopeptide repeat-containing protein alpha (Fragment)		0	NaN	2	2	2	18.1	18.1	18.1	18.27	0	5.6603	3155500	16	NaN	NaN	NaN	NaN	NaN	NaN	NaN	NaN
Q8BJW6	EIF2A_MOUSE	Eif2a	Eukaryotic translation initiation factor 2A		0	NaN	2	2	2	5	5	5	64.403	0	15.237	1881500	4	NaN	NaN	NaN	NaN	NaN	18.5138	NaN	18.6036
Q8BJY1	PSMD5_MOUSE	Psmd5	26S proteasome non-ATPase regulatory subunit 5		0	-0.299558	7	7	7	16.9	16.9	16.9	55.971	0	23.544	10092000	17	19.3927	NaN	NaN	NaN	NaN	19.5996	20.0886	19.3886
A0A0R4J0L6	A0A0R4J0L6_MOUSE	Mrps35	28S ribosomal protein S35, mitochondrial		0	NaN	3	3	3	10	10	10	35.917	0	9.5022	2017000	5	NaN	NaN	NaN	NaN	NaN	NaN	NaN	NaN
Q8BK08	TMM11_MOUSE	Tmem11	Transmembrane protein 11, mitochondrial		0.233055	0.122195	5	5	5	26.3	26.3	26.3	21.311	0	9.2906	43448000	28	22.7509	22.5917	22.7918	22.4886	22.6812	22.1207	22.9188	22.1924
Q8BK30	NDUV3_MOUSE	Ndufv3	NADH dehydrogenase [ubiquinone] flavoprotein 3, mitochondrial		0.157206	0.0980155	5	2	2	46.2	16.3	16.3	11.813	0	21.02	147950000	40	23.5324	23.1704	23.6131	23.6259	NaN	22.9832	NaN	23.4383
Q8BK72	RT27_MOUSE	Mrps27	28S ribosomal protein S27, mitochondrial		0	0.0734191	3	3	3	9.4	9.4	9.4	47.778	0	9.8654	7555200	10	19.2303	NaN	18.7053	NaN	NaN	19.5675	19.2248	19.1299
Q8BKC5	IPO5_MOUSE	Ipo5	Importin-5		0	NaN	4	4	4	5.5	5.5	5.5	123.59	0	8.1749	1434200	5	NaN	NaN	NaN	NaN	NaN	NaN	NaN	NaN
Q8BKE6	CP20A_MOUSE	Cyp20a1	Cytochrome P450 20A1		0.739978	0.270806	14	14	14	39.8	39.8	39.8	52.149	0	46.657	76911000	65	21.6744	22.0878	22.0611	21.9229	22.2026	21.3895	21.6981	21.6557
Q8BKG3	PTK7_MOUSE	Ptk7	Inactive tyrosine-protein kinase 7		0	NaN	2	2	2	2.2	2.2	2.2	117.53	0	3.5453	3673400	8	NaN	NaN	NaN	NaN	NaN	19.3899	19.3764	19.7109
Z4YML9	Z4YML9_MOUSE	Tmem87b	Transmembrane protein 87B (Fragment)		0	NaN	2	2	2	6	6	6	62.398	0.0015083	2.1099	912970	2	NaN	NaN	NaN	NaN	NaN	NaN	NaN	NaN
Q8BKZ9	ODPX_MOUSE	Pdhx	Pyruvate dehydrogenase protein X component, mitochondrial		0.601423	-0.209165	14	14	14	34.3	34.3	34.3	53.998	0	69.377	242280000	156	23.1585	22.6914	23.0808	22.4008	22.9025	23.0045	22.9096	22.995
Q8BL03	MCATL_MOUSE	Slc25a29	Mitochondrial basic amino acids transporter		0	NaN	3	3	3	10.8	10.8	10.8	32.672	0	6.6249	3238900	6	NaN	NaN	NaN	NaN	NaN	NaN	NaN	NaN
Q8BL66	EEA1_MOUSE	Eea1	Early endosome antigen 1		0	NaN	2	2	2	1.5	1.5	1.5	160.91	0.0011485	2.3504	27747000	21	NaN	NaN	NaN	NaN	NaN	NaN	21.1705	20.652
Q8BYQ0	Q8BYQ0_MOUSE	Nceh1	Neutral cholesterol ester hydrolase 1		0	NaN	1	1	1	6	6	6	21.72	0	5.3869	823680	4	NaN	NaN	NaN	NaN	NaN	NaN	NaN	NaN
Q8BLN5	LSS_MOUSE	Lss	Lanosterol synthase		0.494248	0.12878	9	9	9	15.7	15.7	15.7	83.14	0	20.858	21404000	30	20.669	21.1149	20.9477	20.9204	20.8815	20.5968	20.7007	20.8256
Q8BM55	TM214_MOUSE	Tmem214	Transmembrane protein 214		0.82197	0.180844	33	33	33	50.9	50.9	50.9	76.429	0	150.78	1090000000	683	24.533	24.6302	24.7111	24.8423	24.6546	24.5328	24.3835	24.3094
Q8BM72	HSP13_MOUSE	Hspa13	Heat shock 70 kDa protein 13		0.116834	0.0514369	9	9	9	24.8	24.8	24.8	51.709	0	16.86	22031000	31	20.5163	20.7046	20.6128	20.649	21.0804	NaN	20.8683	20.5774
Q8BM75	ARI5B_MOUSE	Arid5b	AT-rich interactive domain-containing protein 5B		0	NaN	1	1	1	1.1	1.1	1.1	131.84	0.0011403	2.2527	0	2	NaN	NaN	NaN	NaN	NaN	NaN	NaN	NaN
Q8BMA6	SRP68_MOUSE	Srp68	Signal recognition particle subunit SRP68		1.22345	-0.352171	13	13	13	26.4	26.4	26.4	70.573	0	36.526	27659000	39	20.2226	NaN	20.8191	20.4222	NaN	20.534	20.5367	20.8085
Q8BMD8	SCMC1_MOUSE	Slc25a24	Calcium-binding mitochondrial carrier protein SCaMC-1		0	0.522404	3	3	3	7.2	7.2	7.2	52.901	0	12.346	8275500	14	NaN	NaN	19.9392	20.2906	NaN	19.5697	19.9498	19.6142
Q8BMF4	ODP2_MOUSE	Dlat	Dihydrolipoyllysine-residue acetyltransferase component of pyruvate dehydrogenase complex, mitochondrial		0.0371317	-0.0168142	28	28	28	47.8	47.8	47.8	67.941	0	207.1	1752800000	604	25.1564	25.1385	25.3039	24.6546	25.022	24.875	24.8461	25.0138
Q8BMJ2	SYLC_MOUSE	Lars1	Leucine--tRNA ligase, cytoplasmic		1.49452	-0.680255	21	21	21	22	22	22	134.19	0	42.618	44182000	61	21.0906	20.5477	21.5311	20.6644	20.0017	21.0947	21.1381	21.2614
Q8BMJ7	CGRF1_MOUSE	Cgrrf1	Cell growth regulator with RING finger domain protein 1		0	NaN	3	3	3	8.7	8.7	8.7	37.899	0	5.8458	1169600	7	NaN	NaN	NaN	NaN	NaN	NaN	NaN	NaN
Q8BMK4	CKAP4_MOUSE	Ckap4	Cytoskeleton-associated protein 4		0.156534	-0.0436006	28	28	28	47	47	47	63.691	0	163.05	165770000	177	21.0576	21.3826	21.2765	21.4389	21.0362	21.2834	21.2292	21.3007
Q8BML9	SYQ_MOUSE	Qars1	Glutamine--tRNA ligase		0.414845	-0.185632	24	23	23	34.5	33.4	33.4	87.676	0	63.142	88662000	98	21.9613	21.9262	21.9171	21.3277	21.4408	21.5588	22.0963	21.8262
A0A0R4J079	A0A0R4J079_MOUSE	Acbd3	Golgi resident protein GCP60		0.605992	-0.333102	5	5	5	13.9	13.9	13.9	60.181	0	16.794	17354000	37	19.6106	19.0194	19.611	19.3957	18.9875	19.9953	18.9973	19.742
Q8BMS1	ECHA_MOUSE	Hadha	Trifunctional enzyme subunit alpha, mitochondrial		0.416929	-0.0965466	39	39	39	55.7	55.7	55.7	82.669	0	323.31	995360000	506	23.7282	23.6941	24.0545	23.6128	23.6788	23.7487	23.7132	23.5837
Q8BMS4	COQ3_MOUSE	Coq3	Ubiquinone biosynthesis O-methyltransferase, mitochondrial		0	NaN	2	2	2	6.5	6.5	6.5	40.956	0	2.9349	4739100	3	NaN	NaN	NaN	NaN	NaN	19.3126	NaN	19.7023
Q8BN82	S17A5_MOUSE	Slc17a5	Sialin		0	NaN	1	1	1	4.2	4.2	4.2	54.369	0	46.571	695170	3	NaN	NaN	NaN	NaN	NaN	NaN	NaN	NaN
Q8BND5	QSOX1_MOUSE	Qsox1	Sulfhydryl oxidase 1		1.15457	0.608856	23	23	23	36.4	36.4	36.4	82.784	0	72.941	237680000	159	22.7095	23.1638	22.587	23.5087	22.7159	22.0831	22.8946	22.0977
Q8BNI4	DERL2_MOUSE	Derl2	Derlin-2		0	NaN	3	3	2	20.5	20.5	17.2	27.639	0	13.512	12979000	13	NaN	NaN	NaN	NaN	NaN	20.621	NaN	20.8764
Q8BP40	PPA6_MOUSE	Acp6	Lysophosphatidic acid phosphatase type 6		0	NaN	3	3	3	9.3	9.3	9.3	47.624	0	6.4746	3660300	6	NaN	NaN	NaN	NaN	NaN	NaN	NaN	NaN
A0A498WGK2	A0A498WGK2_MOUSE	Nars	Asparagine--tRNA ligase		0.190521	0.113947	8	8	8	18.6	18.6	18.6	64.208	0	46.391	36823000	47	20.7761	20.7878	20.8579	20.1939	NaN	20.4761	20.2139	20.3401
Q8BP67	RL24_MOUSE	Rpl24	60S ribosomal protein L24		0.759438	0.489935	11	11	11	51	51	51	17.779	0	41.836	768370000	226	25.3293	25.886	25.5236	26.2373	25.6315	25.2052	25.7841	24.6114
Q8BP92	RCN2_MOUSE	Rcn2	Reticulocalbin-2		1.2892	-0.763103	14	14	14	40.3	40.3	40.3	37.27	0	199.96	155330000	145	21.063	20.9326	21.0614	21.0211	20.6623	22.1859	21.2715	22.2127
Q8BPB0	MOB1B_MOUSE	Mob1b	MOB kinase activator 1B		0	NaN	2	2	2	10.6	10.6	10.6	25.091	0	7.1591	895580	7	NaN	NaN	NaN	NaN	NaN	NaN	NaN	NaN
Q8BPM0	DAAM1_MOUSE	Daam1	Disheveled-associated activator of morphogenesis 1		0	-0.104432	4	4	4	4.5	4.5	4.5	123.37	0	11.621	3758300	14	18.2533	NaN	18.4923	NaN	NaN	18.1139	NaN	18.4669
Q8BPS4	GP180_MOUSE	Gpr180	Integral membrane protein GPR180		0.39897	-0.185719	5	5	5	14.7	14.7	14.7	48.974	0	16.125	33299000	21	NaN	21.1325	21.2299	20.8313	NaN	21.4508	21.0889	20.9007
Q8BQP8	RFIP4_MOUSE	Rab11fip4	Rab11 family-interacting protein 4		0	NaN	1	1	1	1.6	1.6	1.6	71.9	0.007948	1.6692	342730	1	NaN	NaN	NaN	NaN	NaN	NaN	NaN	NaN
Q8BR63	F177A_MOUSE	Fam177a1	Protein FAM177A1		0	-0.00658607	3	3	3	19.3	19.3	19.3	23.578	0	49.673	10632000	12	NaN	NaN	NaN	NaN	20.2488	NaN	20.2553	NaN
B1AV66	B1AV66_MOUSE	Yipf6	Protein YIPF (Fragment)		0.0653343	0.0987878	3	3	3	11.6	11.6	11.6	21.781	0	9.3816	64298000	54	21.2369	21.3897	22.0756	21.4313	21.7854	20.1153	22.3718	20.8854
Q8BRF7	SCFD1_MOUSE	Scfd1	Sec1 family domain-containing protein 1		0.0121165	-0.00351524	24	24	24	43.3	43.3	43.3	72.322	0	165.99	251610000	173	22.4836	22.8295	22.8045	22.8488	22.9111	22.7432	22.7458	22.7935
Q8BRH0	TMTC3_MOUSE	Tmtc3	Protein O-mannosyl-transferase TMTC3		0.281488	-0.0966935	8	8	8	10.9	10.9	10.9	104.2	0	27.546	45404000	34	20.7961	20.9061	20.8917	20.6067	20.4691	21.0332	20.659	20.5808
Q8BRK8	AAPK2_MOUSE	Prkaa2	5-AMP-activated protein kinase catalytic subunit alpha-2		0	NaN	1	1	1	1.8	1.8	1.8	62.022	0	3.7301	4456400	5	NaN	NaN	NaN	NaN	NaN	NaN	NaN	NaN
Q8BRK9	MA2A2_MOUSE	Man2a2	Alpha-mannosidase 2x		0	NaN	5	4	4	4.5	3.8	3.8	130.65	0	12.356	5906600	11	NaN	NaN	NaN	NaN	NaN	NaN	NaN	NaN
Q8BS95	GPHR_MOUSE	Gpr89	Golgi pH regulator		0	NaN	2	2	2	5.1	5.1	5.1	52.734	0	5.8275	4133300	8	NaN	NaN	NaN	NaN	NaN	NaN	NaN	NaN
D3YY63	D3YY63_MOUSE	Pisd	Phosphatidylserine decarboxylase		0	NaN	1	1	1	5.7	5.7	5.7	30.085	0.0011472	2.3396	974750	2	NaN	NaN	NaN	NaN	NaN	NaN	NaN	NaN
A2AL85	A2AL85_MOUSE	Asph	Aspartyl/asparaginyl beta-hydroxylase		0.810202	-0.248008	23	23	23	41.7	41.7	41.7	81.467	0	187.63	141670000	139	21.842	22.3681	22.2217	22.3455	21.9511	22.2853	22.4981	22.4936
Q8BT51	COA4_MOUSE	COA4	Cytochrome c oxidase assembly factor 4 homolog, mitochondrial		0	NaN	1	1	1	16.1	16.1	16.1	10.135	0	5.0351	420350	2	NaN	NaN	NaN	NaN	NaN	NaN	NaN	NaN
Q8BT60	CPNE3_MOUSE	Cpne3	Copine-3		1.34865	-0.304728	8	8	7	14.4	14.4	12.8	59.584	0	20.007	33299000	31	22.1518	22.0185	22.2276	21.8916	NaN	22.3496	22.5433	22.1809
B7FAU9	B7FAU9_MOUSE	Flna	Filamin, alpha		0.433182	0.0978599	92	92	82	45.5	45.5	42.6	280.5	0	323.31	657280000	651	22.1408	22.5344	22.3512	22.4065	22.3031	22.1234	22.3376	22.1813
Q8BTX9	HSDL1_MOUSE	Hsdl1	Inactive hydroxysteroid dehydrogenase-like protein 1		0	0.387685	5	5	5	14.5	14.5	14.5	36.867	0	17.65	12899000	18	NaN	NaN	NaN	20.5392	NaN	20.1346	19.9721	20.348
Q8BTY8	SCFD2_MOUSE	Scfd2	Sec1 family domain-containing protein 2		0.325787	0.148748	6	6	6	11.4	11.4	11.4	74.75	0	26.288	24341000	24	20.9145	20.5163	20.5018	20.5348	20.4588	20.484	20.024	20.8196
Q8BTZ5	ANR46_MOUSE	Ankrd46	Ankyrin repeat domain-containing protein 46		0	NaN	2	2	2	11.8	11.8	11.8	25.222	0	15.183	922300	3	NaN	NaN	NaN	NaN	NaN	NaN	NaN	NaN
Q8BTZ7	GMPPB_MOUSE	Gmppb	Mannose-1-phosphate guanyltransferase beta		1.80961	0.426664	8	8	8	29.2	29.2	29.2	39.916	0	37.541	41541000	43	21.3974	21.3239	21.0206	21.1329	21.2468	20.5658	20.7607	21.0473
Q8BU14	SEC62_MOUSE	Sec62	Translocation protein SEC62		0.307123	0.1084	12	12	12	26.6	26.6	26.6	45.58	0	119.89	262490000	190	22.585	23.0993	22.8371	23.0106	22.6246	22.5935	22.8451	22.6102
Q8BU30	SYIC_MOUSE	Iars1	Isoleucine--tRNA ligase, cytoplasmic		1.09379	-0.528784	22	22	22	20	20	20	144.27	0	66.875	72249000	71	21.7083	21.6056	22.0501	21.2393	21.0491	21.606	22.4403	21.621
Q8BU31	RAP2C_MOUSE	Rap2c	Ras-related protein Rap-2c		0	0.166813	3	3	3	20.8	20.8	20.8	20.745	0	9.1813	4680600	11	NaN	20.5376	20.3708	NaN	NaN	NaN	NaN	NaN
Q8BU33	HACL2_MOUSE	Ilvbl	2-hydroxyacyl-CoA lyase 2		0.249043	-0.113753	10	10	10	21.2	21.2	21.2	68.155	0	30.989	48392000	39	21.461	21.2865	21.2681	21.2131	21.0379	21.8251	21.0493	21.3109
Q8BU88	RM22_MOUSE	Mrpl22	39S ribosomal protein L22, mitochondrial		0	NaN	3	3	3	13.6	13.6	13.6	23.805	0	2.7169	1322600	4	NaN	NaN	NaN	NaN	NaN	NaN	NaN	NaN
Q8BUE7	MUC20_MOUSE	Muc20	Mucin-20		0	NaN	1	1	1	1.7	1.7	1.7	68.719	0	2.9039	430270	2	NaN	NaN	NaN	NaN	NaN	NaN	NaN	NaN
Q8BUV3	GEPH_MOUSE	Gphn	Gephyrin		0	NaN	5	5	5	7.2	7.2	7.2	83.281	0	9.4461	5462600	15	NaN	NaN	NaN	NaN	NaN	18.9268	19.188	19.0247
Q8BUV8	GP107_MOUSE	Gpr107	Protein GPR107		0	NaN	2	2	2	3.8	3.8	3.8	62.055	0	7.31	7473700	11	NaN	NaN	NaN	NaN	NaN	NaN	NaN	NaN
Q8BUY5	TIDC1_MOUSE	Timmdc1	Complex I assembly factor TIMMDC1, mitochondrial		0	NaN	1	1	1	3.2	3.2	3.2	31.791	0.0069217	1.7537	279770	1	NaN	NaN	NaN	NaN	NaN	NaN	NaN	NaN
A0A1W2P7T7	A0A1W2P7T7_MOUSE	Ldah	Lipid droplet-associated hydrolase (Fragment)		0	-0.295558	3	3	3	14.7	14.7	14.7	21.634	0	9.6659	3672200	10	NaN	17.7921	18.9104	19.4375	NaN	NaN	NaN	NaN
A0A3Q4EH71	A0A3Q4EH71_MOUSE	Mpp7	MAGUK p55 subfamily member 7 (Fragment)		0	NaN	1	1	1	3.1	3.1	3.1	39.477	0	3.8193	1806700	3	NaN	NaN	NaN	NaN	NaN	NaN	NaN	NaN
A0A0A6YX18	A0A0A6YX18_MOUSE	Atp6v1h	V-type proton ATPase subunit H		0.61706	-0.188111	10	10	10	26.7	26.7	26.7	54.108	0	129.77	56240000	66	20.6661	20.9331	21.0537	20.4243	20.9001	20.7324	20.8236	21.0664
A0A0G2JGJ1	A0A0G2JGJ1_MOUSE	Qdpr	Dihydropteridine reductase		0	NaN	4	4	4	23.5	23.5	23.5	22.346	0	10.601	4921000	8	NaN	NaN	NaN	NaN	NaN	NaN	NaN	NaN
F7CJY7	F7CJY7_MOUSE	Stx16	Syntaxin-16 (Fragment)		0	NaN	4	4	4	17.1	17.1	17.1	29.315	0	12.822	3525900	8	NaN	NaN	NaN	NaN	NaN	NaN	NaN	NaN
Q8BVQ5	PPME1_MOUSE	Ppme1	Protein phosphatase methylesterase 1		0	NaN	1	1	1	4.7	4.7	4.7	42.256	0.0072569	1.7244	521870	2	NaN	NaN	NaN	NaN	NaN	NaN	NaN	NaN
Q8BW75	AOFB_MOUSE	Maob	Amine oxidase [flavin-containing] B		0.191477	0.0981908	7	7	7	15	15	15	58.557	0	28.517	33485000	54	20.4838	20.9686	20.5599	20.7621	20.1155	20.2994	20.6667	20.4113
Q8BWF0	SSDH_MOUSE	Aldh5a1	Succinate-semialdehyde dehydrogenase, mitochondrial		0	NaN	3	3	3	6.7	6.7	6.7	55.968	0	3.6426	951270	4	NaN	NaN	NaN	NaN	NaN	NaN	NaN	NaN
Q8BWG9	CRCM1_MOUSE	Orai1	Calcium release-activated calcium channel protein 1		1.70414	-0.779727	6	6	6	21.4	21.4	21.4	33.061	0	39.966	95190000	49	21.9789	21.2175	21.9474	21.6413	20.9849	22.4191	22.1743	22.4007
Q8BWM0	PGES2_MOUSE	Ptges2	Prostaglandin E synthase 2		0	0.293368	5	5	5	22.7	22.7	22.7	43.323	0	17.167	15427000	15	21.3613	NaN	NaN	NaN	NaN	NaN	21.4943	20.6416
Q8BWR8	RHPN2_MOUSE	Rhpn2	Rhophilin-2		0	NaN	3	3	3	4.7	4.7	4.7	76.956	0	2.6871	2242400	8	NaN	NaN	NaN	NaN	NaN	NaN	NaN	NaN
Q8BWT1	THIM_MOUSE	Acaa2	3-ketoacyl-CoA thiolase, mitochondrial		0.104699	-0.0371394	21	21	21	67.3	67.3	67.3	41.829	0	300.71	338060000	236	23.4022	23.1238	23.5455	23.1997	23.6531	23.3027	23.334	23.3452
E9Q066	E9Q066_MOUSE	Larp4	La-related protein 4		0.526961	0.461504	14	14	14	27	27	27	79.601	0	36.94	101440000	89	21.9074	20.5316	21.156	21.7421	21.556	21.3889	20.211	21.1351
Q8BWY7	S39AB_MOUSE	Slc39a11	Zinc transporter ZIP11		0.180487	0.417613	3	3	3	11.1	11.1	11.1	35.466	0	6.2424	21923000	37	20.0633	21.593	21.5572	21.4254	NaN	21.937	19.1634	19.781
A0A0G2JG95	A0A0G2JG95_MOUSE	Pgam5	Serine/threonine-protein phosphatase PGAM5, mitochondrial (Fragment)		0.0145636	-0.0117035	5	5	5	24.6	24.6	24.6	20.294	0	16.739	30520000	35	20.6355	19.9776	20.3067	20.8309	20.1131	20.5816	19.9465	20.769
A2AFQ9	A2AFQ9_MOUSE	Gemin5	Gem-associated protein 5		0	NaN	1	1	1	0.6	0.6	0.6	166.52	0	3.0933	335210	2	NaN	NaN	NaN	NaN	NaN	NaN	NaN	NaN
Q8BX90	FND3A_MOUSE	Fndc3a	Fibronectin type-III domain-containing protein 3A		1.13558	0.332905	27	27	27	30.9	30.9	30.9	131.96	0	125.72	288580000	163	22.9716	23.1795	23.1701	23.2319	23.3635	22.5405	22.9019	22.8023
Q8BXA5	CLP1L_MOUSE	Clptm1l	Cleft lip and palate transmembrane protein 1-like protein		0.0566511	-0.0336056	10	10	10	21.3	21.3	21.3	62.183	0	45.538	100360000	61	22.8186	22.6535	22.3987	22.2961	22.2823	22.72	22.1726	22.8936
E9PZK7	E9PZK7_MOUSE	Arfrp1	ADP-ribosylation factor-related protein 1		0	0.0980592	2	2	2	14.3	14.3	14.3	17.127	0	9.2241	12291000	14	NaN	20.3986	20.5918	NaN	NaN	20.1165	20.593	19.901
A2AQJ7	A2AQJ7_MOUSE	Tmem87a	Transmembrane protein 87A		1.59268	-0.56255	5	5	5	9.4	9.4	9.4	57.011	0	67.245	28041000	26	20.0167	19.5114	20.4512	19.9082	19.5309	20.3222	19.9062	20.5378
Q8BXQ2	PIGT_MOUSE	Pigt	GPI transamidase component PIG-T		0	0.172478	8	8	8	14.4	14.4	14.4	65.704	0	10.599	10992000	15	NaN	20.1135	20.135	NaN	NaN	19.8989	NaN	19.7892
Q8BXZ1	TMX3_MOUSE	Tmx3	Protein disulfide-isomerase TMX3		0.45678	0.150733	11	11	11	25.4	25.4	25.4	51.847	0	87.102	102140000	67	21.8273	21.617	21.6722	22.0692	21.5933	21.6762	21.3453	21.8102
A0A1L1SV73	A0A1L1SV73_MOUSE	Usp47	Ubiquitin carboxyl-terminal hydrolase 47		1.11643	-2.38176	2	2	2	1.5	1.5	1.5	157.15	0.0076004	1.6898	84441000	21	NaN	NaN	NaN	22.4078	21.5115	24.8784	23.8044	NaN
Q8BYB9	PGLT1_MOUSE	Poglut1	Protein O-glucosyltransferase 1		0	NaN	1	1	1	2.8	2.8	2.8	46.379	0	3.0803	747550	2	NaN	NaN	NaN	NaN	NaN	NaN	NaN	NaN
H7BX82	H7BX82_MOUSE	Tbc1d4	TBC1 domain family member 4 (Fragment)		0	NaN	3	3	3	4.6	4.6	4.6	92.738	0	4.2303	580470	4	NaN	NaN	NaN	NaN	NaN	NaN	NaN	NaN
Q8BYK6	YTHD3_MOUSE	Ythdf3	YTH domain-containing family protein 3		0	NaN	2	2	2	3.2	3.2	3.2	63.961	0	4.2503	1010800	5	NaN	NaN	NaN	NaN	NaN	NaN	NaN	NaN
Q8BYU6	TOIP2_MOUSE	Tor1aip2	Torsin-1A-interacting protein 2		0.140301	0.0232587	18	18	17	42.2	42.2	40.2	54.495	0	79.043	140230000	133	22.7313	22.5998	22.556	22.5561	22.5174	22.5011	22.6984	22.5562
Q8BYW9	EOGT_MOUSE	Eogt	EGF domain-specific O-linked N-acetylglucosamine transferase		0	NaN	1	1	1	1.9	1.9	1.9	61.445	0.0022514	2.0405	211200	4	NaN	NaN	NaN	NaN	NaN	NaN	NaN	NaN
Q8BZ36	RINT1_MOUSE	Rint1	RAD50-interacting protein 1		0	NaN	3	3	3	4.4	4.4	4.4	90.093	0	12.003	12450000	12	NaN	NaN	20.0307	NaN	NaN	19.9043	NaN	20.0646
Q3TXI7	Q3TXI7_MOUSE	Wwp2	HECT-type E3 ubiquitin transferase		0	NaN	1	1	1	2.3	2.3	2.3	51.06	0	2.7175	294930	1	NaN	NaN	NaN	NaN	NaN	NaN	NaN	NaN
Q8C025	CHPT1_MOUSE	Chpt1	Cholinephosphotransferase 1		0	NaN	4	1	1	9	3	3	44.607	0	4.7577	7687900	10	NaN	NaN	NaN	NaN	NaN	NaN	NaN	NaN
Q8C079	STRP1_MOUSE	Strip1	Striatin-interacting protein 1		0	NaN	1	1	1	2.5	2.5	2.5	95.584	0	4.2238	146590	0	NaN	NaN	NaN	NaN	NaN	NaN	NaN	NaN
E9PWY9	E9PWY9_MOUSE	Farsa	Phenylalanine--tRNA ligase		0	NaN	1	1	1	2.2	2.2	2.2	57.47	0	2.7942	1365200	3	NaN	NaN	NaN	NaN	NaN	NaN	NaN	NaN
Q8C0E2	VP26B_MOUSE	Vps26b	Vacuolar protein sorting-associated protein 26B		0	NaN	1	1	1	3.6	3.6	3.6	39.124	0.0033607	1.9678	375780	1	NaN	NaN	NaN	NaN	NaN	NaN	NaN	NaN
Q8C0I1	ADAS_MOUSE	Agps	Alkyldihydroxyacetonephosphate synthase, peroxisomal		2.44766	0.542815	26	26	4	49	49	3.9	71.683	0	127.81	316140000	236	22.7758	23.1412	22.2014	22.8063	23.002	22.5163	22.5249	22.3114
D3YVC9	D3YVC9_MOUSE	Slc25a16	Graves disease carrier protein homolog (Fragment)		0	NaN	6	6	6	23.9	23.9	23.9	34.912	0	31.646	14702000	20	NaN	NaN	20.8267	NaN	NaN	21.1848	20.3368	20.8139
Q8C0L0	TMX4_MOUSE	Tmx4	Thioredoxin-related transmembrane protein 4		0	NaN	1	1	1	5.4	5.4	5.4	37.131	0	4.2259	729130	3	NaN	NaN	NaN	NaN	NaN	NaN	NaN	NaN
Q8C0N2	GPAT3_MOUSE	Gpat3	Glycerol-3-phosphate acyltransferase 3		0	NaN	3	2	2	7.8	5.7	5.7	49	0	8.2559	2566300	7	NaN	NaN	NaN	NaN	NaN	NaN	NaN	NaN
Q8C0T7	MFSD9_MOUSE	Mfsd9	Major facilitator superfamily domain-containing protein 9		0	NaN	1	1	1	3.2	3.2	3.2	49.663	0	3.3765	865770	2	NaN	NaN	NaN	NaN	NaN	NaN	NaN	NaN
Q8C0Z1	F234A_MOUSE	Fam234a	Protein FAM234A		0	NaN	2	2	2	3.6	3.6	3.6	60.575	0	5.8932	831230	2	NaN	NaN	NaN	NaN	NaN	NaN	NaN	NaN
Q8C129	LCAP_MOUSE	Lnpep	Leucyl-cystinyl aminopeptidase		0.980355	-0.243943	20	20	20	21.6	21.6	21.6	117.3	0	77.384	117920000	121	21.541	21.2354	21.3307	21.1303	21.1157	21.6398	21.3915	21.636
D3Z7N4	D3Z7N4_MOUSE	Slc39a6	Zinc transporter ZIP6 (Fragment)		0	NaN	2	2	2	4.8	4.8	4.8	48.623	0	8.2962	200810	3	NaN	NaN	NaN	NaN	NaN	NaN	NaN	NaN
Q8C163	EXOG_MOUSE	Exog	Nuclease EXOG, mitochondrial		0	-0.384614	6	6	6	22.8	22.8	22.8	41.383	0	14.864	10736000	16	20.7998	20.771	NaN	21.1297	NaN	NaN	21.2848	NaN
V9GXM6	V9GXM6_MOUSE	Cpne1	Copine-1 (Fragment)		0	NaN	2	2	2	12.7	12.7	12.7	21.923	0	5.4912	3319000	10	NaN	NaN	NaN	NaN	NaN	NaN	NaN	NaN
A0A1Y7VKC5	A0A1Y7VKC5_MOUSE	Mtrr	Methionine synthase reductase		0	NaN	1	1	1	5.1	5.1	5.1	17.628	0	3.0503	16504000	6	NaN	NaN	NaN	NaN	NaN	NaN	NaN	NaN
A0A0R4IZY0	A0A0R4IZY0_MOUSE	Thop1	Thimet oligopeptidase		0	NaN	1	1	1	1.7	1.7	1.7	78.026	0.0029895	1.9767	225530	1	NaN	NaN	NaN	NaN	NaN	NaN	NaN	NaN
A0A0J9YTY0	A0A0J9YTY0_MOUSE	Septin11	Septin-11		0	NaN	4	4	4	11.3	11.3	11.3	48.978	0	35.082	10078000	13	NaN	NaN	NaN	NaN	NaN	19.2326	NaN	19.7138
Q8C1E7	TACAN_MOUSE	Tmem120a	Ion channel TACAN		0.298537	-0.0904511	7	7	7	17.8	17.8	17.8	40.751	0	17.588	70670000	60	22.2109	21.7348	21.9864	NaN	21.9825	22.0791	22.179	22.0214
Q8C1Q6	SMIM4_MOUSE	Smim4	Small integral membrane protein 4		0	NaN	1	1	1	15	15	15	9.7463	0	5.4585	608400	3	NaN	NaN	NaN	NaN	NaN	NaN	NaN	NaN
A0A286YCV1	A0A286YCV1_MOUSE	Tmem161b	Transmembrane protein 161B (Fragment)		0	NaN	1	1	1	6.5	6.5	6.5	16.358	0.00038835	2.5555	1246400	2	NaN	NaN	NaN	NaN	NaN	NaN	NaN	NaN
Q8C341	SUCO_MOUSE	Suco	SUN domain-containing ossification factor		0	NaN	4	4	4	3.9	3.9	3.9	139.17	0	13.407	2639900	18	NaN	NaN	NaN	NaN	NaN	NaN	NaN	NaN
Q9QXI6	Q9QXI6_MOUSE	Slc5a1	SGLT1 protein		0	0.355452	5	5	5	8	8	8	73.317	0	19.213	13388000	26	20.773	20.4202	20.0794	20.0518	20.4944	NaN	NaN	NaN
Q8C3X2	CC90B_MOUSE	Ccdc90b	Coiled-coil domain-containing protein 90B, mitochondrial		0	NaN	1	1	1	7	7	7	29.596	0.0018783	2.0652	644980	1	NaN	NaN	NaN	NaN	NaN	NaN	NaN	NaN
Q8C3X8	LMF2_MOUSE	Lmf2	Lipase maturation factor 2		1.63897	-0.961024	9	9	9	14.8	14.8	14.8	79.996	0	42.067	63302000	45	21.3554	22.2115	21.9925	21.8937	21.5473	22.7641	23.1646	22.9307
Q8C407	YIPF4_MOUSE	Yipf4	Protein YIPF4		0.738304	0.379649	2	2	2	8.1	8.1	8.1	27.283	0	4.4805	26793000	16	NaN	21.7009	21.177	NaN	21.7821	NaN	21.5467	NaN
Q8C561	LMBD2_MOUSE	Lmbrd2	G-protein coupled receptor-associated protein LMBRD2		0	NaN	6	6	6	12.7	12.7	12.7	81.1	0	31.704	10117000	27	NaN	NaN	18.7489	NaN	NaN	19.1177	19.4231	19.4701
Q8C5L6	INP5K_MOUSE	Inpp5k	Inositol polyphosphate 5-phosphatase K		0	NaN	3	3	3	6	6	6	54.158	0	4.2238	8477600	9	NaN	NaN	20.2607	NaN	NaN	NaN	19.7401	NaN
Q8C6Z1	MUC15_MOUSE	Muc15	Mucin-15		0	-0.252652	5	5	2	12.4	12.4	3.6	36.382	0	7.5707	135570000	34	23.438	23.0452	23.3964	23.0519	23.0398	NaN	NaN	NaN
Q8C7V8	CC134_MOUSE	Ccdc134	Coiled-coil domain-containing protein 134		0	0.234886	3	3	3	20.5	20.5	20.5	26.494	0	8.476	7814300	12	NaN	20.0949	19.87	NaN	NaN	NaN	19.8501	NaN
Q8C7X2	EMC1_MOUSE	Emc1	ER membrane protein complex subunit 1		0.420658	-0.0732579	40	40	40	45.6	45.6	45.6	111.6	0	191.01	449270000	309	23.3259	23.2271	23.3109	23.271	22.9907	23.2717	23.3108	23.2144
Q8CAQ8	MIC60_MOUSE	Immt	MICOS complex subunit Mic60		0.163967	-0.0321321	65	65	24	70.1	70.1	28.3	83.899	0	323.31	1482600000	921	24.2246	24.2278	24.3649	24.3555	24.2061	24.2806	24.098	24.399
Q8CAY6	THIC_MOUSE	Acat2	Acetyl-CoA acetyltransferase, cytosolic		0.05836	0.0236568	11	11	11	32.7	32.7	32.7	41.297	0	35.305	55620000	48	22.4773	22.2188	22.2743	21.9904	22.3401	21.947	22.4046	22.3062
F6UDR6	F6UDR6_MOUSE	Rnf170	E3 ubiquitin-protein ligase RNF170 (Fragment)		0	-0.00129128	2	2	2	25.7	25.7	25.7	12.782	0	10.146	6007300	12	20.4645	20.4194	20.4432	NaN	NaN	NaN	NaN	NaN
Q8CC88	VWA8_MOUSE	Vwa8	von Willebrand factor A domain-containing protein 8		0	NaN	2	2	2	1.4	1.4	1.4	213.42	0	6.9273	984230	2	NaN	NaN	NaN	NaN	NaN	NaN	NaN	NaN
Q8CCH2	NHLC3_MOUSE	Nhlrc3	NHL repeat-containing protein 3		0	NaN	2	2	2	7.5	7.5	7.5	38.195	0	8.1568	7811800	7	NaN	NaN	NaN	NaN	NaN	NaN	NaN	NaN
Q8CCJ3	UFL1_MOUSE	Ufl1	E3 UFM1-protein ligase 1		0.145867	0.0216746	45	45	45	57.3	57.3	57.3	89.519	0	323.31	567300000	397	23.3542	23.177	23.273	23.149	23.2015	23.1169	23.1815	23.2236
Q8CCM6	TIM21_MOUSE	Timm21	Mitochondrial import inner membrane translocase subunit Tim21		0	NaN	2	2	2	9	9	9	27.911	0	3.2283	1651700	3	NaN	NaN	NaN	NaN	NaN	NaN	NaN	NaN
Q0VF62	Q0VF62_MOUSE	Bcas3	Bcas3 protein		0	NaN	2	2	2	3.1	3.1	3.1	99.464	0	3.368	1874100	2	NaN	NaN	NaN	NaN	NaN	NaN	NaN	NaN
Q8CD26	S35E1_MOUSE	Slc35e1	Solute carrier family 35 member E1		0	NaN	4	4	4	13.7	13.7	13.7	44.325	0	4.7176	8189800	14	21.4344	NaN	NaN	21.3492	NaN	NaN	NaN	NaN
Q8CDN6	TXNL1_MOUSE	Txnl1	Thioredoxin-like protein 1		0	0.00989819	8	8	8	37	37	37	32.237	0	18.547	12532000	28	NaN	NaN	19.4967	19.565	NaN	19.4875	19.4265	19.8098
Q8CEE7	RDH13_MOUSE	Rdh13	Retinol dehydrogenase 13		0.238025	-0.0881224	6	6	6	19.8	19.8	19.8	36.464	0	19.485	13823000	21	20.696	NaN	20.7593	20.6577	20.6245	20.856	20.3987	20.976
Q8CF66	LTOR4_MOUSE	Lamtor4	Ragulator complex protein LAMTOR4		0	NaN	2	2	2	28.3	28.3	28.3	10.678	0	5.174	3622400	3	NaN	NaN	NaN	NaN	NaN	NaN	NaN	NaN
Q8CFA2	GCST_MOUSE	Amt	Aminomethyltransferase, mitochondrial		0	NaN	4	4	4	12.2	12.2	12.2	44.008	0	9.7156	3061900	5	NaN	NaN	NaN	NaN	NaN	NaN	NaN	NaN
Q8CFE6	S38A2_MOUSE	Slc38a2	Sodium-coupled neutral amino acid transporter 2		0.904036	-0.622901	4	4	4	9.1	9.1	9.1	55.503	0	19.558	39309000	23	21.1062	20.2278	20.8897	NaN	19.8977	21.088	20.7851	21.371
Q8CFJ7	S2545_MOUSE	Slc25a45	Solute carrier family 25 member 45		0.628898	0.332651	10	10	10	42.7	42.7	42.7	31.689	0	40.818	29265000	32	21.0325	20.8657	21.1763	20.9343	NaN	20.5083	20.1929	20.5687
A2A7A7	A2A7A7_MOUSE	H6pd	GDH/6PGL endoplasmic bifunctional protein		0	NaN	2	2	2	2.3	2.3	2.3	89.909	0	4.423	2012100	5	NaN	NaN	NaN	NaN	NaN	NaN	NaN	NaN
Q8CG76	ARK72_MOUSE	Akr7a2	Aflatoxin B1 aldehyde reductase member 2		0	NaN	2	2	2	8.7	8.7	8.7	40.612	0	5.7758	7261600	6	NaN	NaN	NaN	NaN	NaN	NaN	NaN	NaN
Q8CGC7	SYEP_MOUSE	Eprs1	Bifunctional glutamate/proline--tRNA ligase		1.9458	-0.265118	35	35	34	30.1	30.1	30.1	170.08	0	210.27	209450000	233	21.6539	21.5778	21.8232	21.3496	21.4551	21.6902	21.771	21.8125
D3Z3E6	D3Z3E6_MOUSE	Tlcd4	TLC domain-containing protein 4 (Fragment)		0	NaN	1	1	1	9.4	9.4	9.4	15.265	0	5.0445	628200	3	NaN	NaN	NaN	NaN	NaN	NaN	NaN	NaN
Q8CGK3	LONM_MOUSE	Lonp1	Lon protease homolog, mitochondrial		0.0391043	-0.020617	15	15	15	20	20	20	105.84	0	44.852	38013000	59	21.3472	20.856	21.0466	20.7916	21.3254	21.3945	21.0761	20.8854
Q8CGN5	PLIN1_MOUSE	Plin1	Perilipin-1		0.448111	-0.15209	8	8	8	20.3	20.3	20.3	55.595	0	29.997	21338000	38	20.2989	NaN	20.4379	19.8989	19.9924	20.0069	20.1327	20.2846
Q8CHK3	MBOA7_MOUSE	Mboat7	Lysophospholipid acyltransferase 7		0	NaN	2	2	2	2.5	2.5	2.5	53.435	0	4.8895	4016100	7	NaN	NaN	NaN	NaN	NaN	NaN	NaN	NaN
Q8CHP8	PGP_MOUSE	Pgp	Glycerol-3-phosphate phosphatase		0.128153	-0.0770235	9	9	9	33.6	33.6	33.6	34.54	0	38.839	33003000	46	21.8758	NaN	21.309	21.4357	21.6465	21.9001	21.6378	22.0718
Q8CHT0	AL4A1_MOUSE	Aldh4a1	Delta-1-pyrroline-5-carboxylate dehydrogenase, mitochondrial		0.114044	0.0462322	11	11	11	24.7	24.7	24.7	61.84	0	37.047	47464000	41	21.0395	21.196	20.6417	20.7611	21.1134	21.0604	21.18	21.0429
Q5NCM6	Q5NCM6_MOUSE	Epn2	Epsin-2		0	NaN	1	1	1	1.7	1.7	1.7	61.648	0	3.5832	1282800	5	NaN	NaN	NaN	NaN	NaN	NaN	NaN	NaN
Q8CHX6	MBTP2_MOUSE	Mbtps2	Membrane-bound transcription factor site-2 protease		0	NaN	3	3	3	6.8	6.8	6.8	56.959	0	3.5534	2487800	6	NaN	NaN	NaN	NaN	NaN	NaN	NaN	NaN
A0A0G2JGZ5	A0A0G2JGZ5_MOUSE	Pdlim5	PDZ and LIM domain protein 5 (Fragment)		0	NaN	4	4	4	22.4	22.4	22.4	23.219	0	8.4954	4953200	13	NaN	NaN	NaN	NaN	NaN	NaN	NaN	NaN
A0A0R4J1G9	A0A0R4J1G9_MOUSE	Steap3	Metalloreductase STEAP3		2.32122	-0.73201	13	13	13	27.7	27.7	27.7	54.747	0	46.887	114220000	75	21.924	22.3753	22.9182	21.832	22.3448	22.6548	22.7576	23.0736
Q8CI78	RMND1_MOUSE	Rmnd1	Required for meiotic nuclear division protein 1 homolog		0	NaN	3	3	3	9.1	9.1	9.1	51.842	0	18.371	7247600	6	NaN	NaN	NaN	NaN	NaN	NaN	NaN	NaN
Q8CI94	PYGB_MOUSE	Pygb	Glycogen phosphorylase, brain form		0.0330099	-0.0238118	11	11	7	14.4	14.4	10	96.729	0	23.206	33449000	36	NaN	20.8568	20.3949	20.898	20.3666	20.9254	21.1062	20.4973
Q8CIB5	FERM2_MOUSE	Fermt2	Fermitin family homolog 2		0	NaN	4	4	4	7.2	7.2	7.2	77.8	0	10.281	3295000	10	NaN	NaN	NaN	NaN	NaN	17.8018	NaN	18.5284
Q8CIB6	TM230_MOUSE	Tmem230	Transmembrane protein 230		0	NaN	2	2	2	20.8	20.8	20.8	13.188	0	9.2155	5645000	8	NaN	NaN	NaN	NaN	NaN	NaN	NaN	NaN
Q8CID3	FA20A_MOUSE	Fam20a	Pseudokinase FAM20A		1.54748	-0.485177	22	22	21	52.5	52.5	50.3	61.525	0	93.675	494960000	237	23.1614	23.3351	23.3604	22.9209	23.4842	23.8725	23.8026	23.8068
Q8CIE6	COPA_MOUSE	Copa	Coatomer subunit alpha		0.473152	-0.114459	37	37	37	35	35	35	138.43	0	136.21	213460000	175	21.7834	21.9043	21.9	21.6775	21.4647	21.6526	21.8871	21.8482
Q8CIN4	PAK2_MOUSE	Pak2	Serine/threonine-protein kinase PAK 2		0	NaN	4	4	4	14.5	14.5	14.5	57.93	0	6.7369	4105200	7	NaN	NaN	NaN	NaN	NaN	18.1845	NaN	19.4421
Q8CJ40	CROCC_MOUSE	Crocc	Rootletin		0	NaN	1	1	1	0.4	0.4	0.4	226.94	0.0096636	1.5626	17812000	13	NaN	NaN	NaN	NaN	NaN	NaN	NaN	NaN
Q8JZN5	ACAD9_MOUSE	Acad9	Complex I assembly factor ACAD9, mitochondrial		0.256986	-0.112958	33	33	33	56.3	56.3	56.3	68.721	0	138.05	353000000	216	22.6217	22.0353	22.0603	21.9836	22.3023	22.5462	22.4452	22.3432
Q8JZN7	MIRO2_MOUSE	Rhot2	Mitochondrial Rho GTPase 2		0	NaN	6	6	6	13.1	13.1	13.1	69.07	0	8.4501	9994400	12	NaN	NaN	NaN	NaN	NaN	20.4656	20.1848	19.6435
Q8JZQ2	AFG32_MOUSE	Afg3l2	AFG3-like protein 2		0.229432	0.0860381	20	20	18	26.3	26.3	24.3	89.518	0	42.448	80192000	139	22.3065	22.185	22.1011	22.101	22.2433	21.94	21.9123	22.5383
Q8JZQ9	EIF3B_MOUSE	Eif3b	Eukaryotic translation initiation factor 3 subunit B		0	0.687781	8	8	8	15.1	15.1	15.1	91.369	0	39.4	18579000	23	20.8693	NaN	20.2426	NaN	NaN	19.3086	20.7792	20.3956
Q8JZR0	ACSL5_MOUSE	Acsl5	Long-chain-fatty-acid--CoA ligase 5		0.833297	0.40296	9	6	6	14.5	10.4	10.4	76.205	0	15.734	18259000	28	20.8739	21.1137	20.5484	20.2549	20.2933	20.0308	20.1131	20.2316
Q8JZU2	TXTP_MOUSE	Slc25a1	Tricarboxylate transport protein, mitochondrial		1.15209	-0.377452	30	30	30	79.4	79.4	79.4	33.931	0	129.65	5959000000	1646	26.7013	26.8147	27.0074	26.9793	26.7383	27.4954	26.8266	27.414
A0A0G2JFV3	A0A0G2JFV3_MOUSE	Adgrl2	Adhesion G protein-coupled receptor L2		0	NaN	3	3	3	2.6	2.6	2.6	151.05	0	8.071	3135200	4	NaN	NaN	NaN	NaN	NaN	NaN	NaN	NaN
Q8K009	AL1L2_MOUSE	Aldh1l2	Mitochondrial 10-formyltetrahydrofolate dehydrogenase		0	NaN	10	10	8	13.1	13.1	10.8	101.59	0	28.923	13561000	18	NaN	NaN	NaN	NaN	NaN	21.0393	21.0922	21.1807
Q8K021	SCAM1_MOUSE	Scamp1	Secretory carrier-associated membrane protein 1		0.655448	0.101118	6	6	6	26.3	26.3	26.3	38.028	0	31.981	54994000	46	22.6147	22.4018	22.5113	22.4724	22.5033	22.4793	22.2595	22.3377
Q8K072	REEP4_MOUSE	Reep4	Receptor expression-enhancing protein 4		0	NaN	2	2	2	12.5	12.5	12.5	29.69	0	16.91	3300500	7	NaN	NaN	NaN	NaN	NaN	NaN	NaN	NaN
Q8K0B2	LMBD1_MOUSE	Lmbrd1	Lysosomal cobalamin transport escort protein LMBD1		0	NaN	1	1	1	3.4	3.4	3.4	61.062	0	4.8275	4714900	12	NaN	NaN	NaN	NaN	NaN	NaN	NaN	NaN
Q8K0C4	CP51A_MOUSE	Cyp51a1	Lanosterol 14-alpha demethylase		1.12649	0.440752	23	23	23	52.7	52.7	52.7	56.775	0	104.2	333670000	196	23.9671	23.8576	23.8179	23.4311	24.0593	23.1511	23.3683	23.2148
Q8K0C9	GMDS_MOUSE	Gmds	GDP-mannose 4,6 dehydratase		0	NaN	5	5	5	16.7	16.7	16.7	41.984	0	7.1289	8847000	10	NaN	NaN	NaN	NaN	NaN	NaN	21.0097	21.0495
Q8K0E8	FIBB_MOUSE	Fgb	Fibrinogen beta chain		0.0597284	0.0626678	26	26	26	59.3	59.3	59.3	54.752	0	298.55	442980000	243	22.1851	22.8875	22.331	23.1683	22.4945	23.3621	22.8193	21.9724
Q7M6W1	Q7M6W1_MOUSE	Rtn1	Reticulon		0	-1.77027	2	2	2	7.7	7.7	7.7	23.557	0	4.879	228320000	89	NaN	22.111	NaN	NaN	NaN	24.1037	23.444	24.096
Q8K135	K319L_MOUSE	Kiaa0319l	Dyslexia-associated protein KIAA0319-like protein		0	NaN	2	2	2	1.7	1.7	1.7	115.31	0	3.3834	2097700	5	NaN	NaN	NaN	NaN	NaN	18.7663	NaN	18.2267
Q8K183	PDXK_MOUSE	Pdxk	Pyridoxal kinase		0.786049	-0.30624	9	9	9	32.4	32.4	32.4	35.015	0	16.159	71169000	40	22.5501	22.1166	22.1628	22.0296	22.0444	22.3395	22.828	22.6354
Q8K190	SMDC1_MOUSE	Saysd1	SAYSvFN domain-containing protein 1		0	NaN	3	3	3	34	34	34	20.703	0	39.211	16115000	25	NaN	NaN	NaN	NaN	NaN	21.1474	NaN	21.5245
Q8K1A5	TM41B_MOUSE	Tmem41b	Transmembrane protein 41B		0.602642	0.445682	4	4	4	13.7	13.7	13.7	32.429	0	8.3337	38886000	69	20.16	21.0208	21.1263	21.1338	21.275	20.2842	20.4204	19.976
Q8K1E0	STX5_MOUSE	Stx5	Syntaxin-5		0.37012	-0.0826821	13	13	13	42.3	42.3	42.3	39.713	0	188.88	65784000	111	21.4208	21.3813	21.5779	21.6797	21.6744	21.6519	21.7568	21.5003
A0A2U3TZ67	A0A2U3TZ67_MOUSE	Dnm1l	Dynamin-1-like protein		0	NaN	2	2	2	3.6	3.6	3.6	65.395	0	4.2074	1499000	2	NaN	NaN	NaN	NaN	NaN	NaN	NaN	NaN
Q8K1Z0	COQ9_MOUSE	Coq9	Ubiquinone biosynthesis protein COQ9, mitochondrial		0.829864	0.775341	6	6	6	28.1	28.1	28.1	35.082	0	13.757	36156000	35	21.4956	20.905	21.5666	21.4782	21.2856	20.5102	19.3845	20.6017
A0A0A0MQD4	A0A0A0MQD4_MOUSE	9530068E07Rik	RIKEN cDNA 9530068E07 gene		0	NaN	1	1	1	5.2	5.2	5.2	27.292	0	4.9088	1378000	8	NaN	NaN	NaN	NaN	NaN	NaN	NaN	NaN
Q8K209	AGRG1_MOUSE	Adgrg1	Adhesion G-protein coupled receptor G1		0	0.00112979	3	3	3	4.7	4.7	4.7	77.254	0	7.1406	11724000	11	21.0348	NaN	NaN	NaN	NaN	20.8405	21.1534	21.107
A8Y5P1	A8Y5P1_MOUSE	Slc31a1	Copper transporter		0	NaN	1	1	1	14.6	14.6	14.6	14.486	0.0011416	2.2692	1301800	1	NaN	NaN	NaN	NaN	NaN	NaN	NaN	NaN
Q8K297	GT251_MOUSE	Colgalt1	Procollagen galactosyltransferase 1		1.18814	0.791254	4	4	4	10.2	10.2	10.2	71.06	0	14.523	9328600	22	19.6564	20.4628	19.3227	20.6219	19.5063	19.3248	19.1644	NaN
A0A338P7B5	A0A338P7B5_MOUSE	Alg3	Dol-P-Man:Man(5)GlcNAc(2)-PP-Dol alpha-1,3-mannosyltransferase		0	NaN	1	1	1	21.7	21.7	21.7	7.9473	0.00076864	2.4061	374720	1	NaN	NaN	NaN	NaN	NaN	NaN	NaN	NaN
Q8K2B3	SDHA_MOUSE	Sdha	Succinate dehydrogenase [ubiquinone] flavoprotein subunit, mitochondrial		0.914509	0.110818	35	35	35	68.7	68.7	68.7	72.585	0	323.31	2291500000	972	26.4755	26.3043	26.2379	26.2636	26.2016	26.2081	26.2065	26.1492
Q8K2C7	OS9_MOUSE	Os9	Protein OS-9		0.59083	-0.152212	19	19	19	33	33	33	76.107	0	102.15	107340000	136	20.9398	21.1722	21.5348	21.1212	21.2762	21.1641	21.0888	21.3305
Q8K2C8	GPAT4_MOUSE	Gpat4	Glycerol-3-phosphate acyltransferase 4		2.17937	-0.663103	14	14	13	30.7	30.7	28.7	52.181	0	35.235	85824000	74	21.3708	21.2517	21.606	21.4255	21.4687	22.1087	22.1053	22.3491
Q8K2C9	HACD3_MOUSE	Hacd3	Very-long-chain (3R)-3-hydroxyacyl-CoA dehydratase 3		0.517623	0.240252	6	6	6	24	24	24	43.131	0	22.391	155470000	54	23.927	24.0399	24.3104	23.9763	24.5566	23.5634	23.7958	23.8692
A0A087WNV1	A0A087WNV1_MOUSE	Agfg1	Arf-GAP domain and FG repeat-containing protein 1		0	NaN	1	1	1	4.4	4.4	4.4	53.974	0.0003888	2.566	1568100	1	NaN	NaN	NaN	NaN	NaN	NaN	NaN	NaN
Q8K2Q9	SHOT1_MOUSE	Shtn1	Shootin-1		0	NaN	3	3	3	5.9	5.9	5.9	71.342	0	6.6034	1790200	11	NaN	NaN	NaN	NaN	NaN	17.2462	NaN	17.8001
Q8K2Y7	RM47_MOUSE	Mrpl47	39S ribosomal protein L47, mitochondrial		0	NaN	4	4	4	16.7	16.7	16.7	29.725	0	8.2444	4277200	6	NaN	NaN	NaN	NaN	NaN	NaN	NaN	NaN
D3YVS7	D3YVS7_MOUSE	Cystm1	Cysteine-rich and transmembrane domain-containing protein 1 (Fragment)		0	NaN	1	1	1	11.9	11.9	11.9	9.1651	0	3.6388	1638000	4	NaN	NaN	NaN	NaN	NaN	NaN	NaN	NaN
Q8K358	PIGU_MOUSE	Pigu	Phosphatidylinositol glycan anchor biosynthesis class U protein		0	NaN	2	2	2	4.6	4.6	4.6	49.804	0	3.5543	1024900	2	NaN	NaN	NaN	NaN	NaN	NaN	NaN	NaN
Q8K3J1	NDUS8_MOUSE	Ndufs8	NADH dehydrogenase [ubiquinone] iron-sulfur protein 8, mitochondrial		0.368829	0.145229	12	12	12	47.6	47.6	47.6	24.038	0	66.972	224180000	145	23.1827	22.8995	23.2317	22.7769	22.9523	22.6615	22.5601	22.7771
Q8K3K7	PLCB_MOUSE	Agpat2	1-acyl-sn-glycerol-3-phosphate acyltransferase beta		1.53624	0.546361	9	9	9	32.7	32.7	32.7	31.01	0	24.932	76074000	51	22.3085	22.471	22.0811	22.1273	NaN	21.4196	21.781	21.742
Q8K411	PREP_MOUSE	Pitrm1	Presequence protease, mitochondrial		0	NaN	4	4	4	3.9	3.9	3.9	117.37	0	6.0801	2840700	6	NaN	NaN	NaN	NaN	NaN	18.4672	NaN	18.8835
Q8K426	RETNG_MOUSE	Retnlg	Resistin-like gamma		0	NaN	2	2	2	23.1	23.1	23.1	12.535	0	5.0483	2299000	3	NaN	NaN	NaN	NaN	NaN	NaN	NaN	NaN
A0A3B2WB50	A0A3B2WB50_MOUSE	Emilin2	EMILIN-2		0	NaN	1	1	1	1	1	1	108.43	0.0040801	1.9335	330720	2	NaN	NaN	NaN	NaN	NaN	NaN	NaN	NaN
Q8K4F5	ABHDB_MOUSE	Abhd11	Protein ABHD11		0.4732	0.277427	7	7	7	35.5	35.5	35.5	33.56	0	8.5502	19465000	22	21.4979	20.8349	21.1866	21.0138	NaN	21.0706	20.5027	20.5925
A2AFJ8	A2AFJ8_MOUSE	Arhgef6	Rho guanine nucleotide exchange factor 6		0	NaN	1	1	1	2.7	2.7	2.7	55.13	0	5.8327	1195400	5	NaN	NaN	NaN	NaN	NaN	NaN	NaN	NaN
Q8K4Z3	NNRE_MOUSE	Naxe	NAD(P)H-hydrate epimerase		0	0.0219727	5	5	5	24.8	24.8	24.8	30.972	0	19.175	23622000	17	21.5252	NaN	20.9831	NaN	NaN	21.8935	21.3491	21.787
Q8K5B2	MCFD2_MOUSE	Mcfd2	Multiple coagulation factor deficiency protein 2 homolog		0.343279	-0.134283	3	3	3	35.9	35.9	35.9	16.168	0	21.74	72266000	46	21.3364	21.4873	22.0208	21.4334	21.5575	21.53	21.2421	21.5588
Q8N7N5	DCAF8_MOUSE	Dcaf8	DDB1- and CUL4-associated factor 8		0	NaN	1	1	1	1.9	1.9	1.9	66.031	0.0069141	1.7441	239920	2	NaN	NaN	NaN	NaN	NaN	NaN	NaN	NaN
A0A2R8VHV7	A0A2R8VHV7_MOUSE	Gpt	Alanine aminotransferase 1 (Fragment)		0	NaN	1	1	1	3.9	3.9	3.9	25.828	0	2.9377	1078800	3	NaN	NaN	NaN	NaN	NaN	NaN	NaN	NaN
Q8QZS1	HIBCH_MOUSE	Hibch	3-hydroxyisobutyryl-CoA hydrolase, mitochondrial		0.443868	-0.218866	13	13	13	32.2	32.2	32.2	43.037	0	61.812	47255000	46	21.1733	20.3939	20.9117	20.3556	20.7183	20.8726	21.1431	20.5893
Q8QZT1	THIL_MOUSE	Acat1	Acetyl-CoA acetyltransferase, mitochondrial		0.353584	0.119746	17	17	17	52.1	52.1	52.1	44.816	0	194.47	358830000	213	23.5066	23.2558	23.4371	23.1418	23.6791	23.3605	23.0656	23.2411
Q8QZY1	EIF3L_MOUSE	Eif3l	Eukaryotic translation initiation factor 3 subunit L		1.01026	0.385303	7	7	7	14	14	14	66.612	0	41.398	11019000	24	19.122	19.6414	18.7579	19.4696	19.5592	19.5132	19.007	18.9729
Q8QZY6	TSN14_MOUSE	Tspan14	Tetraspanin-14		0	NaN	2	2	2	10.4	10.4	10.4	30.673	0	5.7389	7756300	9	NaN	NaN	NaN	NaN	NaN	NaN	NaN	NaN
Q8R010	AIMP2_MOUSE	Aimp2	Aminoacyl tRNA synthase complex-interacting multifunctional protein 2		0	NaN	4	4	4	25	25	25	35.377	0	31.318	12994000	17	NaN	NaN	NaN	NaN	NaN	NaN	NaN	NaN
A2A6T4	A2A6T4_MOUSE	Mrpl58	Peptidyl-tRNA hydrolase ICT1, mitochondrial		0	NaN	1	1	1	6.5	6.5	6.5	21.356	0	4.9339	5304400	6	NaN	NaN	NaN	NaN	NaN	NaN	NaN	NaN
Q8R059	GALE_MOUSE	Gale	UDP-glucose 4-epimerase		0	0.0126375	4	4	4	13.3	13.3	13.3	38.224	0	9.7171	13812000	14	20.4037	NaN	NaN	NaN	NaN	20.1745	20.216	20.7828
Q8R086	SUOX_MOUSE	Suox	Sulfite oxidase, mitochondrial		0	-0.423803	5	5	5	14.8	14.8	14.8	60.755	0	8.439	7334000	9	19.0829	NaN	NaN	NaN	NaN	NaN	20.0671	18.9463
H3BJ12	H3BJ12_MOUSE	Golph3l	Golgi phosphoprotein 3-like (Fragment)		0	NaN	1	1	1	5.4	5.4	5.4	31.812	0	9.0258	662900	2	NaN	NaN	NaN	NaN	NaN	NaN	NaN	NaN
Q8R0F3	SUMF1_MOUSE	Sumf1	Formylglycine-generating enzyme		0.85124	-0.250669	5	5	5	20.2	20.2	20.2	40.659	0	40.237	88013000	34	22.4514	22.6525	22.8456	22.5544	22.2589	22.5109	22.5466	23.0168
Q8R0F8	FAHD1_MOUSE	Fahd1	Acylpyruvase FAHD1, mitochondrial		0	NaN	1	1	1	6.2	6.2	6.2	25.172	0	4.1144	683820	1	NaN	NaN	NaN	NaN	NaN	NaN	NaN	NaN
D3YTR6	D3YTR6_MOUSE	Spns1	Protein spinster homolog 1		0	NaN	2	2	2	8	8	8	51.395	0	7.1998	8713200	13	NaN	NaN	NaN	NaN	NaN	NaN	NaN	NaN
Q8R0K2	TRI31_MOUSE	Trim31	E3 ubiquitin-protein ligase TRIM31		0	NaN	1	1	1	2.6	2.6	2.6	57.127	0	3.8498	3466100	2	NaN	NaN	NaN	NaN	NaN	NaN	NaN	NaN
Q8R0L1	STAP2_MOUSE	Stap2	Signal-transducing adaptor protein 2		0	NaN	1	1	1	2.7	2.7	2.7	45.801	0	3.2465	456460	3	NaN	NaN	NaN	NaN	NaN	NaN	NaN	NaN
A0A2I3BRT4	A0A2I3BRT4_MOUSE	Eppk1	Epiplakin		0	NaN	5	3	3	2.4	1	1	381.72	0.0037189	1.9455	23552000	6	NaN	NaN	NaN	NaN	NaN	NaN	NaN	NaN
Q8R0X7	SGPL1_MOUSE	Sgpl1	Sphingosine-1-phosphate lyase 1		0.465994	0.146753	19	19	19	34	34	34	63.676	0	84.941	107090000	151	21.281	21.6	21.393	21.8145	21.6719	21.7004	21.3717	21.3153
Q8R0Y6	AL1L1_MOUSE	Aldh1l1	Cytosolic 10-formyltetrahydrofolate dehydrogenase		0	0.189863	9	7	7	12.7	10.4	10.4	98.708	0	51.414	10746000	18	19.3417	NaN	NaN	NaN	NaN	19.2105	NaN	19.0933
Q8R127	SCPDL_MOUSE	Sccpdh	Saccharopine dehydrogenase-like oxidoreductase		0.716241	0.463043	5	5	5	11.2	11.2	11.2	47.129	0	8.3782	5580500	17	20.0733	NaN	19.9452	20.4524	NaN	NaN	NaN	19.6544
F6TFF2	F6TFF2_MOUSE	Pttg1ip	Pituitary tumor-transforming gene 1 protein-interacting protein		0	NaN	1	1	1	7.2	7.2	7.2	13.148	0.0011433	2.2947	8466200	7	NaN	NaN	NaN	NaN	NaN	NaN	NaN	NaN
Q8R164	BPHL_MOUSE	Bphl	Valacyclovir hydrolase		0	NaN	2	2	2	12.4	12.4	12.4	32.851	0	5.8027	821300	2	NaN	NaN	NaN	NaN	NaN	NaN	NaN	NaN
Q8R180	ERO1A_MOUSE	Ero1a	ERO1-like protein alpha		0.0020341	0.000474453	18	18	17	52.4	52.4	50	54.084	0	100.26	226990000	164	22.4056	22.5359	22.5331	22.3603	22.334	22.2975	22.5028	22.3006
Q8R197	SAST_MOUSE	Olah	S-acyl fatty acid synthase thioesterase, medium chain		1.52439	-0.443633	16	16	16	58.5	58.5	58.5	30.25	0	55.93	283060000	155	23.728	23.5006	23.6636	23.0658	23.3756	24.0026	23.838	23.9402
Q8R1B4	EIF3C_MOUSE	Eif3c	Eukaryotic translation initiation factor 3 subunit C		0	-0.0513604	8	8	8	11.5	11.5	11.5	105.53	0	72.27	11451000	20	NaN	19.3776	NaN	NaN	NaN	19.1661	19.6069	19.514
Q8R1F1	NIBA2_MOUSE	Niban2	Protein Niban 2		0	-0.273363	10	10	10	12.7	12.7	12.7	84.818	0	20.336	16640000	16	NaN	NaN	NaN	NaN	20.058	19.9893	21.0326	19.9722
Q8R1F6	HID1_MOUSE	Hid1	Protein HID1		0	NaN	3	3	3	4.4	4.4	4.4	88.778	0	16.805	4346800	13	NaN	NaN	18.5354	NaN	NaN	NaN	18.6586	19.0268
Q8R1I1	QCR9_MOUSE	Uqcr10	Cytochrome b-c1 complex subunit 9		0.133612	-0.0566287	4	4	4	51.6	51.6	51.6	7.4454	0	64.658	672200000	98	25.3516	24.7899	25.0518	24.8575	25.2006	25.2817	24.8928	25.1998
Q8R1K1	UBAC2_MOUSE	Ubac2	Ubiquitin-associated domain-containing protein 2		0	-0.428251	3	3	3	11.3	11.3	11.3	39.056	0	6.1067	19517000	15	21.4065	NaN	NaN	NaN	NaN	21.9555	21.888	21.6608
Q8R1Q0	STX19_MOUSE	Stx19	Syntaxin-19		0	NaN	1	1	1	3.1	3.1	3.1	33.866	0.0037202	1.9511	585110	2	NaN	NaN	NaN	NaN	NaN	NaN	NaN	NaN
Q8R1Q8	DC1L1_MOUSE	Dync1li1	Cytoplasmic dynein 1 light intermediate chain 1		0	NaN	3	3	3	7.6	7.6	7.6	56.614	0	9.1313	1638100	3	NaN	NaN	NaN	NaN	NaN	NaN	NaN	NaN
Q7TSQ9	Q7TSQ9_MOUSE	Cog4	Component of oligomeric Golgi complex 4		0	NaN	2	2	2	2.4	2.4	2.4	80.77	0	2.7982	377080	3	NaN	NaN	NaN	NaN	NaN	NaN	NaN	NaN
Q8R1V4	TMED4_MOUSE	Tmed4	Transmembrane emp24 domain-containing protein 4		0.539382	-0.303436	11	9	9	45.4	42.3	42.3	26.022	0	35.443	235620000	111	21.8584	22.0808	21.5107	21.5648	21.9949	22.2445	22.606	22.3516
Q8R1Z9	RN121_MOUSE	Rnf121	RING finger protein 121		1.5862	-0.752404	6	6	2	18.7	18.7	10.1	37.986	0	17.65	57676000	59	21.4954	21.7221	21.7171	21.1825	21.8316	22.4617	22.7135	22.3488
Q8R2E9	ERO1B_MOUSE	Ero1b	ERO1-like protein beta		0	-0.248363	4	3	3	11.1	8.8	8.8	53.517	0	29.907	3176000	7	18.5856	NaN	18.8339	NaN	NaN	NaN	NaN	NaN
Q8R2Q8	BST2_MOUSE	Bst2	Bone marrow stromal antigen 2		0.538028	0.374792	5	5	5	17.4	17.4	17.4	19.152	0	12.502	14362000	34	19.3339	20.2823	19.9724	19.7052	20.2011	19.8019	19.2984	18.9506
Q8R2S8	CD177_MOUSE	Cd177	CD177 antigen		0	NaN	2	2	2	2.4	2.4	2.4	87.09	0	6.0005	1073900	5	NaN	NaN	NaN	NaN	NaN	NaN	NaN	NaN
Q8R2X8	GO45_MOUSE	Blzf1	Golgin-45		0	NaN	1	1	1	2.7	2.7	2.7	45.54	0	7.5611	573360	2	NaN	NaN	NaN	NaN	NaN	NaN	NaN	NaN
Q8R2Y0	ABHD6_MOUSE	Abhd6	Monoacylglycerol lipase ABHD6		0	NaN	1	1	1	3.6	3.6	3.6	38.204	0	2.5978	3370400	1	NaN	NaN	NaN	NaN	NaN	NaN	NaN	NaN
Q8R2Y2	MUC18_MOUSE	Mcam	Cell surface glycoprotein MUC18		0	-0.236722	6	6	6	13.4	13.4	13.4	71.545	0	9.7056	11363000	17	NaN	NaN	20.3543	19.5427	20.6925	NaN	NaN	NaN
Q8R2Y3	DOLK_MOUSE	Dolk	Dolichol kinase		0	NaN	2	2	2	4.1	4.1	4.1	59.145	0	7.2911	8740500	9	NaN	NaN	NaN	NaN	NaN	NaN	NaN	NaN
Q8R2Y8	PTH2_MOUSE	Ptrh2	Peptidyl-tRNA hydrolase 2, mitochondrial		0.585654	0.315305	9	9	9	61.3	61.3	61.3	19.526	0	68.837	260980000	168	24.3052	24.3334	24.642	24.3786	24.0415	23.7123	23.5467	23.8965
Q8R310	TMCC3_MOUSE	Tmcc3	Transmembrane and coiled-coil domain protein 3		0	NaN	7	7	7	19.5	19.5	19.5	53.721	0	19.127	4433300	9	NaN	NaN	NaN	NaN	NaN	NaN	NaN	NaN
Q8R317	UBQL1_MOUSE	Ubqln1	Ubiquilin-1		0	NaN	2	2	2	5.5	5.5	5.5	61.976	0	3.4876	6762000	5	NaN	NaN	NaN	NaN	NaN	NaN	NaN	NaN
G3UYZ1	G3UYZ1_MOUSE	Igsf8	Immunoglobulin superfamily member 8		0	NaN	2	2	2	5.5	5.5	5.5	58.131	0	25.349	1179300	1	NaN	NaN	NaN	NaN	NaN	NaN	NaN	NaN
Q8R3D1	TBC13_MOUSE	Tbc1d13	TBC1 domain family member 13		0	NaN	1	1	1	2.5	2.5	2.5	46.452	0.0040635	1.9007	606690	2	NaN	NaN	NaN	NaN	NaN	NaN	NaN	NaN
A0A2R8VHT7	A0A2R8VHT7_MOUSE	Mcat	Malonyl-CoA-acyl carrier protein transacylase, mitochondrial (Fragment)		0	NaN	1	1	1	11.6	11.6	11.6	13.817	0	13.513	2489000	6	NaN	NaN	NaN	NaN	NaN	NaN	NaN	NaN
Q8R3H7	HS2ST_MOUSE	Hs2st1	Heparan sulfate 2-O-sulfotransferase 1		0	NaN	2	2	2	7.3	7.3	7.3	41.813	0	2.6894	3087900	3	NaN	NaN	NaN	NaN	NaN	NaN	NaN	NaN
Q8R3Q0	SARAF_MOUSE	Saraf	Store-operated calcium entry-associated regulatory factor		0.336933	-0.165633	10	10	10	37.4	37.4	37.4	35.856	0	148.37	34297000	44	20.6409	20.7871	20.9492	20.7228	19.9798	20.7408	20.5114	20.5917
Q8R404	MIC13_MOUSE	Micos13	MICOS complex subunit MIC13		0	NaN	2	2	2	23.5	23.5	23.5	13.373	0	21.408	12885000	9	NaN	NaN	NaN	NaN	NaN	20.5804	20.4259	20.2388
Q6AXE3	Q6AXE3_MOUSE	Abca3	ATP-binding cassette sub-family A member 3		0	NaN	1	1	1	1	1	1	163.48	0.0015043	2.0806	1688600	4	NaN	NaN	NaN	NaN	NaN	NaN	NaN	NaN
Q8R429	AT2A1_MOUSE	Atp2a1	Sarcoplasmic/endoplasmic reticulum calcium ATPase 1		1.42234	1.90157	49	33	30	43.7	31.7	29.4	109.42	0	243.79	745890000	587	22.8171	24.8361	21.3891	24.6808	25.3163	22.5034	23.6455	22.5059
A0A286YDV6	A0A286YDV6_MOUSE	Slc30a5	Zinc transporter 5		0	0.507954	2	2	2	3.3	3.3	3.3	77.766	0	6.4666	6331300	9	NaN	21.232	20.7241	NaN	NaN	NaN	NaN	NaN
Q8R4N0	CLYBL_MOUSE	Clybl	Citramalyl-CoA lyase, mitochondrial		0.144704	0.0996943	6	6	6	17.5	17.5	17.5	37.548	0	19.608	16738000	26	19.6536	NaN	19.984	19.5476	20.0663	19.7456	19.7825	19.1125
B2FDF6	B2FDF6_MOUSE	Snap47	Synaptosomal-associated protein 47		0	NaN	1	1	1	3.6	3.6	3.6	37.131	0.0040726	1.9186	709650	1	NaN	NaN	NaN	NaN	NaN	NaN	NaN	NaN
Q8R5J9	PRAF3_MOUSE	Arl6ip5	PRA1 family protein 3		1.08629	0.755029	5	5	5	25	25	25	21.557	0	10.402	46844000	26	NaN	22.2	22.0828	22.2445	21.7293	21.2466	20.9331	20.9493
Q8R5M8	CADM1_MOUSE	Cadm1	Cell adhesion molecule 1		0.144741	0.169556	3	3	3	7.7	7.7	7.7	49.788	0	62.55	5537900	23	17.9683	18.9099	18.9471	NaN	19.2571	NaN	18.3475	18.3321
Q8VBT0	TMX1_MOUSE	Tmx1	Thioredoxin-related transmembrane protein 1		0.466134	0.131016	13	13	13	34.2	34.2	34.2	31.395	0	84.765	240440000	158	23.6254	23.8372	23.8395	23.6704	24.0758	23.5048	23.75	23.5905
Q8VBT6	APOBR_MOUSE	Apobr	Apolipoprotein B receptor		0.924985	0.250085	7	7	7	8.7	8.7	8.7	102.7	0	33.763	9789000	23	19.2271	NaN	NaN	NaN	19.0415	18.9989	18.9012	18.7527
Q8VBZ3	CLPT1_MOUSE	Clptm1	Cleft lip and palate transmembrane protein 1 homolog		0.979625	0.27677	12	12	12	26.1	26.1	26.1	75.29	0	129.52	85999000	110	21.9956	22.0775	21.9653	21.9572	22.1693	21.3847	21.7751	21.9674
E9Q4T9	E9Q4T9_MOUSE	Tmprss4	Transmembrane protease serine 4		0	NaN	1	1	1	4.8	4.8	4.8	36.747	0	2.5949	403600	1	NaN	NaN	NaN	NaN	NaN	NaN	NaN	NaN
Q8VCF0	MAVS_MOUSE	Mavs	Mitochondrial antiviral-signaling protein		1.04547	0.675151	7	7	7	26.6	26.6	26.6	53.398	0	30.634	63841000	104	22.6813	21.8036	22.4801	22.5318	22.605	21.7327	21.3927	21.3156
Q8VCH6	DHC24_MOUSE	Dhcr24	Delta(24)-sterol reductase		0	0.156912	5	5	5	9.1	9.1	9.1	60.112	0	8.8595	10728000	13	19.8712	19.7883	NaN	19.2918	NaN	NaN	19.4935	NaN
Q8VCI5	PEX19_MOUSE	Pex19	Peroxisomal biogenesis factor 19		0	NaN	2	2	2	10.4	10.4	10.4	32.733	0	5.6019	507250	1	NaN	NaN	NaN	NaN	NaN	NaN	NaN	NaN
Q8VCL2	SCO2_MOUSE	Sco2	Protein SCO2 homolog, mitochondrial		0	NaN	3	3	3	13.7	13.7	13.7	28.944	0.0011459	2.3219	10238000	11	NaN	NaN	NaN	NaN	NaN	NaN	NaN	NaN
Q8VCM7	FIBG_MOUSE	Fgg	Fibrinogen gamma chain		0.135916	0.127971	25	25	25	55.7	55.7	55.7	49.391	0	143.49	488740000	299	23.1919	23.7866	23.3725	24.2011	23.5999	24.173	23.8615	22.8606
Q8VCM8	NCLN_MOUSE	Ncln	Nicalin		0.627351	-0.10406	20	20	20	35.2	35.2	35.2	62.907	0	88.679	288920000	180	22.5564	22.4143	22.5457	22.6148	22.6636	22.742	22.7854	22.5923
Q8VCS3	XYLK_MOUSE	Fam20b	Glycosaminoglycan xylosylkinase		0	NaN	2	2	2	5.6	5.6	5.6	46.58	0	4.4165	3114700	6	NaN	NaN	NaN	NaN	NaN	NaN	NaN	NaN
E9PYF1	E9PYF1_MOUSE	Rnpep	Aminopeptidase B		0	NaN	3	3	3	6.1	6.1	6.1	68.002	0	5.4883	1197900	9	NaN	NaN	NaN	NaN	NaN	NaN	NaN	NaN
Q8VCT4	EST1D_MOUSE	Ces1d	Carboxylesterase 1D		0.452261	-0.230334	27	27	23	57.9	57.9	51.5	61.787	0	107.96	760270000	403	24.356	24.834	25.0228	24.5787	24.0291	24.4703	24.8453	24.3809
Q8VCW4	UN93B_MOUSE	Unc93b1	Protein unc-93 homolog B1		0	NaN	1	1	1	2.8	2.8	2.8	66.98	0	12.783	4141000	6	NaN	NaN	NaN	NaN	NaN	NaN	NaN	NaN
E9Q9E0	E9Q9E0_MOUSE	Micu1	Calcium uptake protein 1, mitochondrial (Fragment)		0	NaN	1	1	1	5.6	5.6	5.6	26.718	0	4.78	1047300	3	NaN	NaN	NaN	NaN	NaN	NaN	NaN	NaN
Q8VD31	TPSNR_MOUSE	Tapbpl	Tapasin-related protein		0	NaN	5	5	5	13.1	13.1	13.1	48.732	0	9.5218	10678000	15	NaN	NaN	NaN	NaN	NaN	NaN	NaN	NaN
A0A0A6YX21	A0A0A6YX21_MOUSE	Sft2d2	Vesicle transport protein		0	NaN	2	2	2	16.9	16.9	16.9	6.9339	0	4.4349	8450200	10	NaN	NaN	NaN	NaN	NaN	NaN	20.8384	21.0717
Q8VDD5	MYH9_MOUSE	Myh9	Myosin-9		1.05804	-0.213801	126	126	101	57.4	57.4	46.6	226.37	0	323.31	1130300000	1086	22.9572	22.8956	23.3329	22.9891	22.7475	22.9059	23.0485	23.1573
Q8VDG5	PPCS_MOUSE	Ppcs	Phosphopantothenate--cysteine ligase		0	NaN	2	2	2	7.7	7.7	7.7	33.794	0	3.5759	199690	4	NaN	NaN	NaN	NaN	NaN	NaN	NaN	NaN
Q8VDI9	ALG9_MOUSE	Alg9	Alpha-1,2-mannosyltransferase ALG9		0.150843	-0.132821	9	9	9	23.7	23.7	23.7	69.56	0	32.244	38175000	35	20.9238	21.4823	20.8704	NaN	NaN	21.489	21.2367	21.7473
Q8VDJ3	VIGLN_MOUSE	Hdlbp	Vigilin		0.541464	-0.0995603	39	39	39	35.3	35.3	35.3	141.74	0	272.98	253390000	217	22.625	22.4888	22.5488	22.3048	22.2712	22.4854	22.4878	22.566
Q8VDK1	NIT1_MOUSE	Nit1	Deaminated glutathione amidase		0	NaN	2	2	2	12.4	12.4	12.4	35.705	0	7.3517	8223200	10	NaN	NaN	NaN	NaN	NaN	NaN	NaN	NaN
Q3UDS7	Q3UDS7_MOUSE	Adpgk	ADP-dependent glucokinase		0.78778	0.220597	12	12	12	34.3	34.3	34.3	53.788	0	77.404	111160000	75	22.1994	22.7316	22.3646	22.4922	22.2917	22.1005	22.2992	22.0682
Q8VDM4	PSMD2_MOUSE	Psmd2	26S proteasome non-ATPase regulatory subunit 2		0.185766	-0.139931	11	11	11	15.7	15.7	15.7	100.2	0	51.529	24339000	50	19.9486	20.5694	20.5915	NaN	20.5699	20.0742	21.0074	20.3372
Q8VDM6	HNRL1_MOUSE	Hnrnpul1	Heterogeneous nuclear ribonucleoprotein U-like protein 1		0	NaN	1	1	1	0.9	0.9	0.9	96.001	0.0011455	2.3158	1251100	3	NaN	NaN	NaN	NaN	NaN	NaN	NaN	NaN
Q8VDN2	AT1A1_MOUSE	Atp1a1	Sodium/potassium-transporting ATPase subunit alpha-1		2.18759	-0.218948	45	45	30	43.3	43.3	29.3	112.98	0	323.31	1777500000	850	24.427	24.5319	24.5926	24.409	24.2861	24.6167	24.6416	24.6789
A0A0U1RP13	A0A0U1RP13_MOUSE	Cdipt	CDP-diacylglycerol--inositol 3-phosphatidyltransferase		0.12888	0.078949	3	3	3	17.3	17.3	17.3	20.292	0	9.6532	22815000	32	21.6782	21.5275	21.7629	21.9213	21.6267	21.9157	20.9744	21.7848
Q8VDS8	STX18_MOUSE	Stx18	Syntaxin-18		0.563407	0.257139	7	7	7	24.3	24.3	24.3	38.381	0	12.727	20814000	26	NaN	20.2207	19.8807	20.3551	20.6389	20.2231	20.5501	19.9372
Q8VDT9	RM50_MOUSE	Mrpl50	39S ribosomal protein L50, mitochondrial		0	-0.496967	3	3	3	26.4	26.4	26.4	18.213	0	7.7959	5833100	14	19.954	NaN	NaN	NaN	NaN	NaN	20.451	NaN
Q3TI14	Q3TI14_MOUSE	Mrps23	28S ribosomal protein S23, mitochondrial		0	-0.0261326	3	3	3	27.2	27.2	27.2	18.283	0	13.705	3015600	7	18.9158	NaN	NaN	NaN	NaN	NaN	18.9419	NaN
Q8VE47	UBA5_MOUSE	Uba5	Ubiquitin-like modifier-activating enzyme 5		0.475516	0.147702	2	2	2	5.5	5.5	5.5	44.789	0	8.8155	7245800	16	20.9354	NaN	NaN	20.7492	NaN	NaN	20.7657	20.6235
Q8VE91	RETR1_MOUSE	Retreg1	Reticulophagy regulator 1		0	NaN	4	4	4	12.9	12.9	12.9	52.966	0	9.1452	10870000	12	NaN	NaN	NaN	NaN	NaN	NaN	NaN	NaN
Q9D1W4	Q9D1W4_MOUSE	C030006K11Rik	RIKEN cDNA C030006K11 gene		0	NaN	1	1	1	8.4	8.4	8.4	15.717	0	5.4228	2023600	6	NaN	NaN	NaN	NaN	NaN	NaN	NaN	NaN
A0A0G2JEG3	A0A0G2JEG3_MOUSE	Slc35f6	Solute carrier family 35 member F6		0	NaN	1	1	1	3.1	3.1	3.1	35.25	0.0058587	1.7991	158710	1	NaN	NaN	NaN	NaN	NaN	NaN	NaN	NaN
Q8VE97	SRSF4_MOUSE	Srsf4	Serine/arginine-rich splicing factor 4		0	NaN	3	1	1	5.9	2.7	2.7	55.979	0	5.8135	1658000	10	NaN	NaN	NaN	NaN	NaN	NaN	NaN	NaN
Q8VE99	CC115_MOUSE	Ccdc115	Coiled-coil domain-containing protein 115		2.45638	0.48679	9	9	9	52.2	52.2	52.2	19.742	0	25.987	42191000	41	21.8963	21.7676	21.4326	21.7703	21.7162	21.1089	NaN	21.3609
Q8VEA4	MIA40_MOUSE	Chchd4	Mitochondrial intermembrane space import and assembly protein 40		0	NaN	1	1	1	20.1	20.1	20.1	15.525	0	11.532	3883300	12	NaN	NaN	NaN	NaN	NaN	NaN	NaN	NaN
F6QKK2	F6QKK2_MOUSE	Arl8a	ADP-ribosylation factor-like protein 8A (Fragment)		0.348361	-0.376662	9	3	3	50.3	14.5	14.5	18.756	0	5.5461	23152000	21	20.9838	NaN	NaN	NaN	22.1303	21.8615	22.04	21.8997
Q8VEH8	ERLEC_MOUSE	Erlec1	Endoplasmic reticulum lectin 1		0.16335	0.191711	13	13	13	37.1	37.1	37.1	54.906	0	30.154	35656000	33	20.598	21.078	20.3001	21.9526	20.8175	NaN	21.4365	21.0229
D3YVV1	D3YVV1_MOUSE	Tmem30a	Cell cycle control protein		0	NaN	2	2	2	7.9	7.9	7.9	37.178	0	16.303	11757000	16	NaN	NaN	NaN	NaN	NaN	NaN	NaN	NaN
Q8VEL0	MSPD1_MOUSE	Mospd1	Motile sperm domain-containing protein 1		1.89286	-0.472786	4	4	4	18.3	18.3	18.3	24.074	0	9.0541	14468000	25	20.0261	20.0327	NaN	20.3253	NaN	20.6023	20.5145	20.6856
Q8VEM8	MPCP_MOUSE	Slc25a3	Phosphate carrier protein, mitochondrial		1.40538	0.26387	19	19	19	53.8	53.8	53.8	39.632	0	189.91	2697600000	592	26.7309	26.5683	26.5831	26.7432	26.6133	26.5222	26.2038	26.2912
Q8VEN2	PLET1_MOUSE	Plet1	Placenta-expressed transcript 1 protein		0.231423	0.589731	2	2	2	7.6	7.6	7.6	25.006	0	37.621	29588000	17	21.1765	21.6256	21.8507	20.7848	20.2791	NaN	18.9029	NaN
F7AA45	F7AA45_MOUSE	Rbm39	RNA-binding protein 39 (Fragment)		0	NaN	1	1	1	5.5	5.5	5.5	33.828	0	5.0177	682980	2	NaN	NaN	NaN	NaN	NaN	NaN	NaN	NaN
Q8VHE0	SEC63_MOUSE	Sec63	Translocation protein SEC63 homolog		0.00263319	-0.000898361	32	32	32	49.3	49.3	49.3	87.869	0	323.31	741810000	402	24.0399	23.8275	24.0127	24.1547	23.6699	23.8582	23.9463	23.8784
Q8VHX6	FLNC_MOUSE	Flnc	Filamin-C		0	NaN	16	4	4	6.4	1.8	1.8	291.12	0	25.016	1878100	10	NaN	NaN	NaN	NaN	NaN	17.8784	NaN	18.2758
Q8VHY0	CSPG4_MOUSE	Cspg4	Chondroitin sulfate proteoglycan 4		0	NaN	2	2	2	1.1	1.1	1.1	252.31	0.00038685	2.5019	2280700	6	NaN	NaN	NaN	NaN	NaN	NaN	NaN	NaN
F7BWP1	F7BWP1_MOUSE	Ciapin1	Anamorsin (Fragment)		0	NaN	1	1	1	4.7	4.7	4.7	27.575	0	3.5165	167560	1	NaN	NaN	NaN	NaN	NaN	NaN	NaN	NaN
Q8WUR0	CS012_MOUSE	1 SV=1	Protein C19orf12 homolog		0	NaN	1	1	1	7.1	7.1	7.1	15.087	0	13.8	0	1	NaN	NaN	NaN	NaN	NaN	NaN	NaN	NaN
Q91V01	MBOA5_MOUSE	Lpcat3	Lysophospholipid acyltransferase 5		0.43675	-0.165494	5	5	5	11.9	11.9	11.9	56.146	0	33.751	39304000	58	21.1343	21.2173	21.6346	21.8048	21.5456	21.3917	21.7101	21.6275
Q91V04	TRAM1_MOUSE	Tram1	Translocating chain-associated membrane protein 1		0.965747	0.422203	5	5	5	12	12	12	43.039	0	60.563	184070000	166	23.3239	23.3074	23.6381	23.5429	23.7785	22.8085	22.834	22.9832
Q91V08	CLC2D_MOUSE	Clec2d	C-type lectin domain family 2 member D		0	NaN	1	1	1	7.2	7.2	7.2	23.647	0	3.5504	943790	1	NaN	NaN	NaN	NaN	NaN	NaN	NaN	NaN
Q91V41	RAB14_MOUSE	Rab14	Ras-related protein Rab-14		3.29808	-0.324746	23	23	23	86.5	86.5	86.5	23.897	0	231.52	637430000	334	22.9063	22.92	23.195	23.027	23.032	23.3407	23.3181	23.3305
Q91V61	SFXN3_MOUSE	Sfxn3	Sideroflexin-3		0.985957	-0.175889	17	17	16	54.5	54.5	48.6	35.406	0	127.51	792330000	236	23.4583	23.6674	23.5326	23.3991	23.3826	23.7652	23.5517	23.7615
Q91VC3	IF4A3_MOUSE	Eif4a3	Eukaryotic initiation factor 4A-III		0	NaN	11	7	7	22.6	16.5	16.5	46.839	0	13.837	5131600	10	NaN	NaN	NaN	NaN	NaN	19.7367	NaN	20.0087
G3X924	G3X924_MOUSE	Plvap	Plasmalemma vesicle-associated protein		0	NaN	2	2	2	5.3	5.3	5.3	49.903	0	3.7823	1888500	4	NaN	NaN	NaN	NaN	NaN	NaN	NaN	NaN
A0A286YDK2	A0A286YDK2_MOUSE	Ghitm	Growth hormone-inducible transmembrane protein (Fragment)		0	NaN	1	1	1	5.1	5.1	5.1	21.695	0.0033545	1.957	8814300	10	NaN	NaN	NaN	NaN	NaN	NaN	NaN	NaN
Q91VD9	NDUS1_MOUSE	Ndufs1	NADH-ubiquinone oxidoreductase 75 kDa subunit, mitochondrial		1.19224	0.146771	48	48	48	65.5	65.5	65.5	79.776	0	323.31	1207900000	884	24.4661	24.3619	24.4435	24.436	24.4381	24.2344	24.1548	24.2823
Q91VE0	S27A4_MOUSE	Slc27a4	Long-chain fatty acid transport protein 4		1.09747	-0.159807	31	31	29	49.1	49.1	45.7	72.318	0	140.28	227270000	169	22.6768	22.8403	22.8912	22.9105	22.5964	22.9803	22.875	22.9168
Q91VH2	SNX9_MOUSE	Snx9	Sorting nexin-9		0	NaN	1	1	1	2	2	2	66.545	0	4.8139	1722300	5	NaN	NaN	NaN	NaN	NaN	NaN	NaN	NaN
Q91VI7	RINI_MOUSE	Rnh1	Ribonuclease inhibitor		1.24421	0.691973	9	9	9	23.2	23.2	23.2	49.816	0	33.615	16710000	31	19.2814	19.6585	19.1919	19.6907	19.8325	18.1174	19.1363	19.2496
Q91VJ2	CAVN3_MOUSE	Cavin3	Caveolae-associated protein 3		0.0657347	-0.0373236	7	7	7	38.1	38.1	38.1	27.853	0	10.366	13114000	31	NaN	20.3529	19.909	19.8934	20.2001	20.2536	20.3958	NaN
Q91VK1	BZW2_MOUSE	Bzw2	Basic leucine zipper and W2 domain-containing protein 2		0	NaN	2	2	2	5	5	5	48.063	0	10.143	3620100	6	NaN	NaN	NaN	NaN	NaN	19.0449	NaN	18.3677
E9Q4M4	E9Q4M4_MOUSE	Chchd6	MICOS complex subunit Mic25		0	NaN	4	4	4	18.4	18.4	18.4	26.388	0	9.1783	5043700	8	NaN	NaN	NaN	NaN	NaN	20.1635	NaN	19.9945
Q91VR5	DDX1_MOUSE	Ddx1	ATP-dependent RNA helicase DDX1		0	NaN	9	9	9	16.1	16.1	16.1	82.499	0	27.007	10322000	18	NaN	NaN	NaN	NaN	NaN	18.8705	NaN	20.6655
Q91VS7	MGST1_MOUSE	Mgst1	Microsomal glutathione S-transferase 1		0.447766	0.273885	7	7	7	32.9	32.9	32.9	17.551	0	65.017	1654200000	523	26.8415	26.5627	26.9564	26.6531	26.6003	26.0771	26.7153	25.8132
D3Z4C0	D3Z4C0_MOUSE	Farp2	FERM, ARHGEF and pleckstrin domain-containing protein 2		0	NaN	2	2	2	2.5	2.5	2.5	87.861	0	4.3073	2553700	4	NaN	NaN	NaN	NaN	NaN	NaN	NaN	NaN
Q91VT4	CBR4_MOUSE	Cbr4	Carbonyl reductase family member 4		0	NaN	5	5	5	24.6	24.6	24.6	25.414	0	14.893	6900800	31	NaN	NaN	NaN	NaN	NaN	20.1921	NaN	20.1211
A2A8S2	A2A8S2_MOUSE	Yipf1	Protein YIPF (Fragment)		0	NaN	2	2	2	9.5	9.5	9.5	27.434	0	13.78	1074600	7	NaN	NaN	NaN	NaN	NaN	NaN	NaN	NaN
I7HPY0	I7HPY0_MOUSE	Sh3bgrl3	SH3 domain-binding glutamic acid-rich-like protein 3		0	NaN	1	1	1	27	27	27	4.2126	0	3.7301	2976700	13	NaN	NaN	NaN	NaN	NaN	NaN	NaN	NaN
A0A0N4SW50	A0A0N4SW50_MOUSE	Tmem168	Transmembrane protein 168		0	NaN	3	3	3	13.4	13.4	13.4	35.587	0	17.115	3064100	4	NaN	NaN	NaN	NaN	NaN	NaN	NaN	NaN
Q91W10	S39A8_MOUSE	Slc39a8	Metal cation symporter ZIP8		0	NaN	2	2	2	10.4	10.4	10.4	50.081	0	3.2564	34436000	18	NaN	NaN	NaN	NaN	NaN	NaN	NaN	NaN
Q91W43	GCSP_MOUSE	Gldc	Glycine dehydrogenase (decarboxylating), mitochondrial		0.0814952	-0.0431581	18	18	18	22.6	22.6	22.6	113.27	0	76.123	59875000	68	21.0525	20.4488	20.925	20.4869	21.1244	20.6324	20.8727	20.8551
Q91W50	CSDE1_MOUSE	Csde1	Cold shock domain-containing protein E1		0	NaN	2	2	2	3.1	3.1	3.1	88.79	0	6.0263	962440	2	NaN	NaN	NaN	NaN	NaN	NaN	NaN	NaN
A0A1W2P7R5	A0A1W2P7R5_MOUSE	Tmem19	Transmembrane protein 19		0	NaN	1	1	1	5.5	5.5	5.5	25.162	0	5.776	9473600	7	NaN	NaN	NaN	NaN	NaN	NaN	NaN	NaN
Q91W53	GOGA7_MOUSE	Golga7	Golgin subfamily A member 7		0	NaN	4	4	4	29.9	29.9	29.9	15.792	0	5.944	3581100	12	NaN	NaN	NaN	NaN	NaN	NaN	NaN	NaN
Q91W90	TXND5_MOUSE	Txndc5	Thioredoxin domain-containing protein 5		1.4561	-0.355915	20	20	20	51.8	51.8	51.8	46.415	0	120.84	705850000	230	24.7744	24.7974	25.1206	24.6901	24.896	25.1592	25.4544	24.8474
A0A0R4J0G3	A0A0R4J0G3_MOUSE	Nipal2	NIPA-like protein 2		0	NaN	1	1	1	4.2	4.2	4.2	42.076	0.0090025	1.6251	310810	1	NaN	NaN	NaN	NaN	NaN	NaN	NaN	NaN
Q91WD0	GP108_MOUSE	Gpr108	Protein GPR108		0.107884	-0.156007	5	5	5	10.5	10.5	10.5	63.98	0	15.428	47119000	26	22.5587	22.5825	20.9503	21.794	22.1427	22.9433	22.6844	23.1238
Q91WD5	NDUS2_MOUSE	Ndufs2	NADH dehydrogenase [ubiquinone] iron-sulfur protein 2, mitochondrial		0.453477	0.121591	28	28	28	67.4	67.4	67.4	52.625	0	179.02	604070000	419	24.2867	23.9254	24.2063	24.1796	24.0753	23.9166	23.7812	24.0766
Q91WE4	CR032_MOUSE	3 SV=1	UPF0729 protein C18orf32 homolog		0	NaN	3	3	3	44.4	44.4	44.4	8.0355	0	5.2678	13249000	13	NaN	NaN	NaN	NaN	NaN	20.273	20.8286	19.444
Q91WE6	CDKAL_MOUSE	Cdkal1	Threonylcarbamoyladenosine tRNA methylthiotransferase		0.585829	0.41912	5	5	5	12.8	12.8	12.8	65.288	0	14.466	4443200	16	19.4203	NaN	NaN	19.9516	NaN	NaN	19.3089	19.2248
Q91WG8	GLCNE_MOUSE	Gne	Bifunctional UDP-N-acetylglucosamine 2-epimerase/N-acetylmannosamine kinase		0	NaN	6	6	6	9.7	9.7	9.7	79.198	0	15.163	8280500	11	NaN	NaN	NaN	NaN	NaN	NaN	19.3528	20.9755
Q91WK2	EIF3H_MOUSE	Eif3h	Eukaryotic translation initiation factor 3 subunit H		0	NaN	4	4	4	14.8	14.8	14.8	39.832	0	10.97	5182000	16	NaN	NaN	NaN	NaN	NaN	19.6221	19.5162	NaN
Q91WK5	GCSH_MOUSE	Gcsh	Glycine cleavage system H protein, mitochondrial		0	NaN	2	2	2	10	10	10	18.637	0	3.4035	4984200	5	NaN	NaN	NaN	NaN	NaN	NaN	NaN	NaN
Q91WM2	HDHD5_MOUSE	Hdhd5	Haloacid dehalogenase-like hydrolase domain-containing 5		0.548267	0.532063	4	4	4	11.7	11.7	11.7	46.306	0	13.334	7285400	13	20.8182	NaN	20.7681	NaN	21.488	20.4741	NaN	NaN
G3X8T9	G3X8T9_MOUSE	Serpina3n	Serine protease inhibitor A3N		0	NaN	2	1	1	8.1	4.5	4.5	46.766	0	50.935	1127700	2	NaN	NaN	NaN	NaN	NaN	NaN	NaN	NaN
Q91WQ3	SYYC_MOUSE	Yars1	Tyrosine--tRNA ligase, cytoplasmic		0	NaN	4	4	4	7.6	7.6	7.6	59.105	0	9.2603	4492400	12	NaN	NaN	18.733	NaN	NaN	17.8553	18.421	18.6384
Q91WS0	CISD1_MOUSE	Cisd1	CDGSH iron-sulfur domain-containing protein 1		0.799022	-0.242142	6	6	6	50	50	50	12.097	0	60.769	251370000	180	22.834	22.5722	22.7784	22.5901	22.7164	23.195	22.6061	23.1018
Q91WU0	EST1F_MOUSE	Ces1f	Carboxylesterase 1F		0	-0.0292444	8	7	5	19.1	17.8	13.2	61.612	0	19.303	19375000	14	20.7795	NaN	NaN	21.2128	NaN	NaN	21.0254	NaN
Q91X21	K2013_MOUSE	Kiaa2013	Uncharacterized protein KIAA2013		0	-0.269391	7	7	7	15.8	15.8	15.8	69.424	0	11.086	16403000	21	20.5142	NaN	NaN	NaN	NaN	NaN	20.8514	20.7158
A2AC16	A2AC16_MOUSE	Dcxr	L-xylulose reductase		0	NaN	2	2	2	9.3	9.3	9.3	24.99	0	4.0273	1811600	6	NaN	NaN	NaN	NaN	NaN	19.2315	NaN	19.6561
Q91X72	HEMO_MOUSE	Hpx	Hemopexin		1.31936	0.378476	13	13	13	34.8	34.8	34.8	51.317	0	24.885	66238000	62	21.5462	21.2733	21.1155	21.4069	21.8376	21.3258	21.2203	20.8885
Q91X78	ERLN1_MOUSE	Erlin1	Erlin-1		0	NaN	7	4	4	17.8	8.9	8.9	39.182	0	8.8767	4202900	17	NaN	NaN	NaN	NaN	NaN	18.369	19.0608	19.0889
Q91XA2	GOLM1_MOUSE	Golm1	Golgi membrane protein 1		0.30298	0.158902	4	4	4	13.2	13.2	13.2	44.326	0	13.339	20219000	29	19.9056	19.8588	19.3149	19.6075	20.156	19.9715	NaN	19.8828
A0A494B8Y8	A0A494B8Y8_MOUSE	Yif1a	Protein YIF1A		0.388665	0.584937	7	7	7	26.1	26.1	26.1	26.438	0	19.937	49867000	53	22.747	22.9545	22.7264	22.7366	21.7081	NaN	21.1768	NaN
Q91XC8	DAP1_MOUSE	Dap	Death-associated protein 1		0	NaN	3	3	3	30.4	30.4	30.4	11.154	0	4.816	4744800	10	NaN	NaN	NaN	NaN	NaN	18.8787	NaN	19.2159
Q91XC9	PEX16_MOUSE	Pex16	Peroxisomal membrane protein PEX16		0.391268	0.28045	4	4	4	14.6	14.6	14.6	38.677	0	13.227	25285000	27	20.708	21.5459	20.9948	NaN	20.776	20.7671	20.2111	20.9452
Q91XD7	CREL1_MOUSE	Creld1	Protein disulfide isomerase Creld1		0	NaN	1	1	1	2.9	2.9	2.9	45.717	0.0065741	1.7772	267740	1	NaN	NaN	NaN	NaN	NaN	NaN	NaN	NaN
A0A1L1SSA8	A0A1L1SSA8_MOUSE	Tmem205	Transmembrane protein 205 (Fragment)		0.0587278	0.0226212	5	5	5	20.2	20.2	20.2	19.612	0	17.536	119550000	66	22.5541	22.5379	22.4083	22.3143	22.6027	22.6535	22.1709	22.6857
D3Z7I9	D3Z7I9_MOUSE	Osbpl1a	Oxysterol-binding protein (Fragment)		0	NaN	1	1	1	5.4	5.4	5.4	20.659	0.0011468	2.3394	813630	2	NaN	NaN	NaN	NaN	NaN	NaN	NaN	NaN
Q91XU3	PI42C_MOUSE	Pip4k2c	Phosphatidylinositol 5-phosphate 4-kinase type-2 gamma		0	NaN	1	1	1	4	4	4	47.335	0	4.1546	8892100	7	NaN	NaN	NaN	NaN	NaN	NaN	NaN	NaN
Q91XV3	BASP1_MOUSE	Basp1	Brain acid soluble protein 1		1.22552	1.26755	14	14	14	82.7	82.7	82.7	22.086	0	229.66	219290000	232	22.541	24.0868	23.1186	23.6591	23.9696	21.6267	22.9113	21.5296
E9PYT3	E9PYT3_MOUSE	Atl3	Atlastin-3		1.20108	0.267849	17	17	16	50.2	50.2	48.9	60.231	0	242.17	205280000	147	22.5435	22.7081	22.4387	22.5372	22.3141	22.2301	22.0361	22.3265
E9PUT1	E9PUT1_MOUSE	Tbrg4	FAST kinase domain-containing protein 4		0	NaN	2	2	2	5.8	5.8	5.8	41.501	0	4.7229	953540	4	NaN	NaN	NaN	NaN	NaN	NaN	NaN	NaN
Q91YN9	BAG2_MOUSE	Bag2	BAG family molecular chaperone regulator 2		0	NaN	2	2	2	9	9	9	23.473	0	4.2888	2362500	5	NaN	NaN	NaN	NaN	NaN	NaN	NaN	NaN
Q91YP0	L2HDH_MOUSE	L2hgdh	L-2-hydroxyglutarate dehydrogenase, mitochondrial		0	NaN	3	3	3	10.1	10.1	10.1	50.898	0	4.1852	3122200	4	NaN	NaN	NaN	NaN	NaN	NaN	NaN	NaN
Q91YP2	NEUL_MOUSE	Nln	Neurolysin, mitochondrial		0	NaN	4	4	4	7	7	7	80.428	0	11.441	4070200	12	20.4317	NaN	NaN	NaN	20.5101	NaN	NaN	NaN
Q91YQ5	RPN1_MOUSE	Rpn1	Dolichyl-diphosphooligosaccharide--protein glycosyltransferase subunit 1		3.03623	-0.220114	55	55	55	74.3	74.3	74.3	68.527	0	323.31	5962700000	1719	26.4669	26.5787	26.7231	26.4973	26.5739	26.7958	26.6976	26.7808
Q91YR1	TWF1_MOUSE	Twf1	Twinfilin-1		0.00874189	0.00645256	6	6	6	20	20	20	40.079	0	52.488	30008000	35	19.8804	20.5649	20.1358	19.9253	19.9912	19.6793	19.9426	20.5782
D3YUM1	D3YUM1_MOUSE	Ndufv1	NADH dehydrogenase [ubiquinone] flavoprotein 1, mitochondrial		0.334333	0.0747991	30	30	30	65.7	65.7	65.7	49.913	0	236.64	766630000	382	23.2949	23.1766	23.2676	23.2138	23.232	23.1419	22.8993	23.3092
Q91YT8	CSCL1_MOUSE	Tmem63a	CSC1-like protein 1		0.0892476	0.0485678	6	6	6	9.2	9.2	9.2	91.859	0	28.026	22749000	26	20.1871	20.3007	19.8117	19.8223	20.1694	20.0462	19.8725	20.5549
Q91YW3	DNJC3_MOUSE	Dnajc3	DnaJ homolog subfamily C member 3		1.6866	-0.298054	35	35	35	61.5	61.5	61.5	57.463	0	323.31	800210000	412	23.4981	23.2754	23.4202	23.2567	23.2799	23.6132	23.6878	23.7811
Q91YY4	ATPF2_MOUSE	Atpaf2	ATP synthase mitochondrial F1 complex assembly factor 2		0	NaN	1	1	1	3.1	3.1	3.1	33.289	0	2.9593	323090	1	NaN	NaN	NaN	NaN	NaN	NaN	NaN	NaN
Q91Z53	GRHPR_MOUSE	Grhpr	Glyoxylate reductase/hydroxypyruvate reductase		0.215168	0.163869	6	6	6	25.6	25.6	25.6	35.328	0	12.878	18255000	22	21.1371	21.5911	21.4076	20.6686	20.9305	21.0393	20.9379	20.2869
Q91Z58	CF132_MOUSE	1 SV=2	Uncharacterized protein C6orf132 homolog		0.000215017	-0.000113487	7	7	7	7.4	7.4	7.4	127.88	0	14.373	11834000	16	20.5924	NaN	NaN	NaN	20.4961	20.6445	20.2911	20.6975
Q91Z83	MYH7_MOUSE	Myh7	Myosin-7		0	NaN	5	2	1	3.2	1.1	0.5	222.88	0	8.942	7608300	11	NaN	NaN	NaN	NaN	NaN	NaN	NaN	NaN
Q91ZA3	PCCA_MOUSE	Pcca	Propionyl-CoA carboxylase alpha chain, mitochondrial		0.293638	-0.121908	22	22	22	36.9	36.9	36.9	79.921	0	93.366	167600000	115	22.1387	21.7306	21.8949	21.8876	22.3027	22.2583	21.9904	22.4037
Q91ZE0	TMLH_MOUSE	Tmlhe	Trimethyllysine dioxygenase, mitochondrial		0	NaN	1	1	1	2.4	2.4	2.4	49.609	0.00076805	2.399	0	1	NaN	NaN	NaN	NaN	NaN	NaN	NaN	NaN
Q91ZJ5	UGPA_MOUSE	Ugp2	UTP--glucose-1-phosphate uridylyltransferase		0.349593	-0.134379	12	12	12	26	26	26	56.979	0	59.84	59464000	58	21.7696	21.3188	21.3278	21.1812	21.2074	21.4045	21.7523	21.5298
Q91ZN5	S35B2_MOUSE	Slc35b2	Adenosine 3-phospho 5-phosphosulfate transporter 1		0.14256	0.0873542	8	8	8	14.6	14.6	14.6	47.369	0	35.738	70746000	41	23.2706	22.452	22.938	23.0134	23.0004	22.5546	23.2464	22.6479
A0A1Y7VLN4	A0A1Y7VLN4_MOUSE	Lpin1	Phosphatidate phosphatase		0	NaN	2	2	2	3.7	3.7	3.7	98.535	0	4.9754	2839200	3	NaN	NaN	NaN	NaN	NaN	NaN	NaN	NaN
Q91ZR1	RAB4B_MOUSE	Rab4b	Ras-related protein Rab-4B		0	-0.611979	5	4	2	28.6	22.1	11.7	23.629	0	7.599	8019100	9	19.7615	NaN	NaN	NaN	NaN	NaN	20.5578	20.1892
A2AMC3	A2AMC3_MOUSE	Pofut1	GDP-fucose protein O-fucosyltransferase 1		0	NaN	1	1	1	4.5	4.5	4.5	40.02	0.0058544	1.7977	2109200	2	NaN	NaN	NaN	NaN	NaN	NaN	NaN	NaN
A0A0R4J0I9	A0A0R4J0I9_MOUSE	Lrp1	Prolow-density lipoprotein receptor-related protein 1		0	-0.515097	15	15	15	4.5	4.5	4.5	504.77	0	53.879	12415000	26	19.5275	NaN	NaN	NaN	NaN	20.2718	20.2078	19.648
Q920A5	RISC_MOUSE	Scpep1	Retinoid-inducible serine carboxypeptidase		0	NaN	1	1	1	2	2	2	50.964	0	2.9851	1103100	3	NaN	NaN	NaN	NaN	NaN	NaN	NaN	NaN
Q920A7	AFG31_MOUSE	Afg3l1	AFG3-like protein 1		0	NaN	5	3	3	7.2	5.2	5.2	87.046	0	4.7906	4250000	7	NaN	NaN	NaN	NaN	NaN	NaN	NaN	NaN
Q920E5	FPPS_MOUSE	Fdps	Farnesyl pyrophosphate synthase		0	NaN	7	7	7	22.7	22.7	22.7	40.581	0	26.278	15482000	15	NaN	NaN	NaN	NaN	NaN	20.8467	20.9697	20.6491
Q920L1	FADS1_MOUSE	Fads1	Acyl-CoA (8-3)-desaturase		1.60745	-0.462058	13	13	13	29.8	29.8	29.8	52.322	0	58.525	468960000	144	23.9336	23.7421	24.0681	23.8711	23.7587	24.6644	24.0351	24.3862
A0A0G2JFE8	A0A0G2JFE8_MOUSE	Elovl6	Elongation of very long chain fatty acids protein (Fragment)		0	NaN	1	1	1	7.5	7.5	7.5	23.602	0	16.578	1427900	2	NaN	NaN	NaN	NaN	NaN	NaN	NaN	NaN
H3BIX9	H3BIX9_MOUSE	Lrch4	Leucine-rich repeat and calponin homology domain-containing protein 4		0	NaN	2	2	2	7.3	7.3	7.3	67.895	0	3.4542	346710	1	NaN	NaN	NaN	NaN	NaN	NaN	NaN	NaN
Q6PF96	Q6PF96_MOUSE	Etfdh	Electron transfer flavoprotein-ubiquinone oxidoreductase		0.712886	0.202754	24	24	24	46.9	46.9	46.9	61.16	0	105.69	510740000	287	23.1897	23.0567	23.1438	23.1753	22.7746	22.7661	22.757	22.7184
Q921H8	THIKA_MOUSE	Acaa1a	3-ketoacyl-CoA thiolase A, peroxisomal		1.01588	0.309409	18	18	18	54.7	54.7	54.7	43.953	0	196.92	286790000	127	23.8846	24.4581	24.0765	23.996	24.2687	23.6585	23.857	23.7779
Q921H9	COA7_MOUSE	Coa7	Cytochrome c oxidase assembly factor 7		0	NaN	2	2	2	9.1	9.1	9.1	25.617	0	7.3464	2001600	9	NaN	NaN	NaN	NaN	NaN	NaN	NaN	NaN
Q921I1	TRFE_MOUSE	Tf	Serotransferrin		0.96934	-0.22026	72	72	66	75.3	75.3	72.5	76.723	0	323.31	14491000000	2999	28.0685	27.945	27.9163	27.6147	27.7503	28.1989	28.088	28.0564
Q921J2	RHEB_MOUSE	Rheb	GTP-binding protein Rheb		0	NaN	2	2	2	13	13	13	20.451	0.0011351	2.1897	905090	3	NaN	NaN	NaN	NaN	NaN	NaN	NaN	NaN
Q921K8	TCAF2_MOUSE	Tcaf2	TRPM8 channel-associated factor 2		0.236666	-0.274881	7	7	7	10.8	10.8	10.8	101.6	0	22.144	26626000	26	20.8908	NaN	NaN	20.572	NaN	21.311	21.364	20.3439
Q921L3	TMCO1_MOUSE	Tmco1	Calcium load-activated calcium channel		0.850718	0.32115	6	6	6	25.5	25.5	25.5	21.175	0	18.688	277670000	96	26.2454	26.3012	25.7597	26.3234	25.8019	25.8104	25.5677	26.2494
Q921L5	COG2_MOUSE	Cog2	Conserved oligomeric Golgi complex subunit 2		0	NaN	1	1	1	1.8	1.8	1.8	82.039	0.0082973	1.641	0	1	NaN	NaN	NaN	NaN	NaN	NaN	NaN	NaN
Z4YJU8	Z4YJU8_MOUSE	Golga2	Golgin subfamily A member 2		1.40614	-0.518544	20	20	20	23.5	23.5	23.5	108.63	0	62.814	86244000	151	20.6107	20.6847	20.6781	20.4866	20.7292	21.0869	21.2206	21.5999
A0A2I3BQK1	A0A2I3BQK1_MOUSE	Cyrib	CYFIP-related Rac1 interactor B (Fragment)		0	NaN	1	1	1	17.1	17.1	17.1	8.6745	0	4.7642	537110	2	NaN	NaN	NaN	NaN	NaN	NaN	NaN	NaN
Q921N7	TMM70_MOUSE	Tmem70	Transmembrane protein 70, mitochondrial		0	NaN	2	2	2	7.9	7.9	7.9	28.274	0	4.2663	4243200	13	NaN	NaN	NaN	NaN	NaN	19.7687	19.5161	19.8803
Q921Q3	ALG1_MOUSE	Alg1	Chitobiosyldiphosphodolichol beta-mannosyltransferase		0	NaN	3	3	3	9.1	9.1	9.1	54.417	0	5.8204	12200000	8	NaN	NaN	NaN	NaN	NaN	20.1513	21.0913	20.3481
Q921S7	RM37_MOUSE	Mrpl37	39S ribosomal protein L37, mitochondrial		0	NaN	3	3	3	7.8	7.8	7.8	48.34	0	7.0293	3150500	4	NaN	NaN	NaN	NaN	NaN	NaN	NaN	NaN
Q921T2	TOIP1_MOUSE	Tor1aip1	Torsin-1A-interacting protein 1		0	NaN	6	5	5	12.4	10.8	10.8	66.78	0	9.4394	13397000	11	NaN	NaN	NaN	21.6909	21.4827	NaN	NaN	NaN
Q921U8	SMTN_MOUSE	Smtn	Smoothelin		0	NaN	4	4	4	6.9	6.9	6.9	100.29	0	48.232	1709400	11	NaN	NaN	NaN	NaN	NaN	NaN	NaN	NaN
Q921V5	MGAT2_MOUSE	Mgat2	Alpha-1,6-mannosyl-glycoprotein 2-beta-N-acetylglucosaminyltransferase		0.423506	-0.20957	9	9	9	31.2	31.2	31.2	51.029	0	29.742	66604000	40	22.0711	21.6462	22.0689	22.204	21.3279	21.8184	21.9566	22.2435
Q921V7	CTL3_MOUSE	Slc44a3	Choline transporter-like protein 3		0	NaN	1	1	1	2.4	2.4	2.4	73.413	0	8.7927	3587900	9	NaN	NaN	NaN	NaN	NaN	NaN	NaN	NaN
Q921X9	PDIA5_MOUSE	Pdia5	Protein disulfide-isomerase A5		0	NaN	5	5	5	12.2	12.2	12.2	59.266	0	6.552	3094700	7	NaN	NaN	NaN	NaN	NaN	NaN	NaN	NaN
Q922B1	MACD1_MOUSE	Macrod1	ADP-ribose glycohydrolase MACROD1		0.345688	0.245307	4	4	4	17.6	17.6	17.6	35.294	0	15.446	20009000	18	21.4213	21.1241	NaN	21.4781	NaN	20.5772	21.5021	21.2082
Q922B2	SYDC_MOUSE	Dars1	Aspartate--tRNA ligase, cytoplasmic		1.28504	-0.318737	23	23	23	53.5	53.5	53.5	57.147	0	85.662	154780000	114	21.8772	21.5338	21.9894	21.65	21.6693	21.9591	22.2963	21.7605
A2AQD6	A2AQD6_MOUSE	Itprid2	Protein ITPRID2		0.861102	-0.581851	10	10	10	10.5	10.5	10.5	133.46	0	27.302	23878000	39	20.5346	19.4346	20.054	NaN	19.561	20.6506	20.4398	20.5566
Q922D8	C1TC_MOUSE	Mthfd1	C-1-tetrahydrofolate synthase, cytoplasmic		0.128989	-0.0525403	11	11	11	13.2	13.2	13.2	101.2	0	34.858	16410000	46	18.9972	19.271	19.4141	19.1444	19.2804	19.493	18.9044	19.0917
Q922H4	GMPPA_MOUSE	Gmppa	Mannose-1-phosphate guanyltransferase alpha		0.419856	0.171454	7	7	7	20.7	20.7	20.7	46.244	0	25.159	19051000	30	20.6532	20.355	20.6078	20.3158	NaN	20.3141	20.1657	19.9919
Q922J9	FACR1_MOUSE	Far1	Fatty acyl-CoA reductase 1		1.24212	0.252332	21	21	21	42.9	42.9	42.9	59.434	0	62.903	213360000	129	22.8406	23.2939	22.6989	23.0404	23.0787	22.8009	22.7858	22.9587
Q922Q1	MARC2_MOUSE	Mtarc2	Mitochondrial amidoxime reducing component 2		0.880821	0.182568	22	22	22	58	58	58	38.194	0	117.08	661860000	477	24.2809	24.0727	24.081	23.9398	24.0139	23.94	23.8166	23.7395
Q922Q4	P5CR2_MOUSE	Pycr2	Pyrroline-5-carboxylate reductase 2		0.66317	0.351299	16	16	13	59.7	59.7	49.1	33.659	0	50.296	141710000	126	22.8418	22.861	23.0427	22.9884	23.3433	22.6732	22.0163	22.897
A0A286YCU5	A0A286YCU5_MOUSE	Slc35b3	Adenosine 3-phospho 5-phosphosulfate transporter 2 (Fragment)		0	NaN	1	1	1	7.6	7.6	7.6	13.768	0.003362	1.9723	992570	2	NaN	NaN	NaN	NaN	NaN	NaN	NaN	NaN
Q922Q8	LRC59_MOUSE	Lrrc59	Leucine-rich repeat-containing protein 59		0.70618	-0.207355	18	18	18	47.6	47.6	47.6	34.877	0	216.05	2628100000	487	26.3255	26.6209	26.3933	26.56	26.6392	26.9505	26.871	26.7601
Q923B6	STEA4_MOUSE	Steap4	Metalloreductase STEAP4		0.105002	0.0767288	9	9	9	23.8	23.8	23.8	52.993	0	28.211	30361000	51	20.351	20.0354	20.9964	20.8605	20.6086	20.195	20.1873	20.1699
Q923D2	BLVRB_MOUSE	Blvrb	Flavin reductase (NADPH)		0	NaN	2	2	2	15	15	15	22.197	0	6.1826	7383600	10	NaN	NaN	NaN	NaN	NaN	19.8773	NaN	19.7801
Q923S9	RAB30_MOUSE	Rab30	Ras-related protein Rab-30		0.219526	0.0932703	10	10	9	56.7	56.7	51.7	23.058	0	147.2	68535000	85	22.294	21.9865	22.0444	22.0385	21.656	21.6894	21.7424	22.1255
D3Z792	D3Z792_MOUSE	Rtn4ip1	Reticulon-4-interacting protein 1, mitochondrial		0	NaN	2	2	2	22.7	22.7	22.7	19.047	0.0015077	2.1098	20419000	6	NaN	NaN	NaN	NaN	NaN	NaN	NaN	NaN
Q924X2	CPT1B_MOUSE	Cpt1b	Carnitine O-palmitoyltransferase 1, muscle isoform		0	-0.655252	4	4	3	6.2	6.2	4.8	88.216	0	15.097	3960000	6	NaN	20.3003	20.9555	NaN	NaN	NaN	NaN	NaN
Q924Z4	CERS2_MOUSE	Cers2	Ceramide synthase 2		0.575416	0.187187	5	5	5	12.4	12.4	12.4	45.024	0	16.447	34748000	30	21.5195	NaN	21.2937	NaN	21.4776	21.0808	21.551	21.32
Q924Z5	TRAM2_MOUSE	Tram2	Translocating chain-associated membrane protein 2		0	NaN	1	1	1	3.2	3.2	3.2	43.182	0.0040741	1.924	661020	2	NaN	NaN	NaN	NaN	NaN	NaN	NaN	NaN
D3Z5Y0	D3Z5Y0_MOUSE	Esam	Endothelial cell-selective adhesion molecule (Fragment)		0	NaN	1	1	1	5.2	5.2	5.2	27.217	0	5.8135	688320	1	NaN	NaN	NaN	NaN	NaN	NaN	NaN	NaN
Q925I1	ATAD3_MOUSE	Atad3	ATPase family AAA domain-containing protein 3		1.22257	0.378781	27	27	27	46.4	46.4	46.4	66.741	0	282.2	203970000	165	22.1976	22.0555	22.2988	22.4655	22.3918	21.8055	21.7167	21.7744
D3YXH5	D3YXH5_MOUSE	Sfxn5	Sideroflexin-5		0	NaN	2	2	2	17.6	17.6	17.6	11.94	0	3.9052	2478400	6	NaN	NaN	NaN	NaN	NaN	NaN	NaN	NaN
Q925N2	SFXN2_MOUSE	Sfxn2	Sideroflexin-2		0.497836	-0.217275	10	10	10	34.8	34.8	34.8	36.141	0	27.027	66996000	53	22.1005	21.9593	21.7623	21.3628	21.7701	22.1003	21.8944	22.3048
Q93092	TALDO_MOUSE	Taldo1	Transaldolase		0.392802	-0.113842	22	22	22	53.1	53.1	53.1	37.387	0	55.932	316870000	202	23.5147	23.514	23.7088	23.2909	23.7831	23.6356	23.4264	23.7874
Q99020	ROAA_MOUSE	Hnrnpab	Heterogeneous nuclear ribonucleoprotein A/B		0	NaN	1	1	1	4.6	4.6	4.6	30.831	0	5.7672	878610	4	NaN	NaN	NaN	NaN	NaN	NaN	NaN	NaN
F7D5L2	F7D5L2_MOUSE	Wdr77	Methylosome protein 50 (Fragment)		0	NaN	2	2	2	19.2	19.2	19.2	18.128	0	2.6794	1282500	3	NaN	NaN	NaN	NaN	NaN	NaN	NaN	NaN
Q99J23	GHDC_MOUSE	Ghdc	GH3 domain-containing protein		0	NaN	3	3	3	5.5	5.5	5.5	58.507	0	19.857	2820800	8	NaN	NaN	NaN	NaN	NaN	NaN	NaN	NaN
Q99J27	ACATN_MOUSE	Slc33a1	Acetyl-coenzyme A transporter 1		0.0509519	0.0425444	10	10	10	18.4	18.4	18.4	61.075	0	42.229	39801000	46	21.3376	21.2286	21.5535	21.2066	20.5672	20.4722	20.879	21.2652
Q99J39	DCMC_MOUSE	Mlycd	Malonyl-CoA decarboxylase, mitochondrial		0	NaN	2	2	2	6.9	6.9	6.9	54.735	0	12.186	3626800	7	NaN	NaN	NaN	NaN	NaN	19.8793	19.6718	NaN
Z4YKT6	Z4YKT6_MOUSE	Dhrs7b	Dehydrogenase/reductase SDR family member 7B		0.327388	0.106908	15	15	15	49.4	49.4	49.4	33.225	0	76.982	121800000	96	22.889	22.6588	22.6611	22.7828	22.5082	22.5019	22.3631	22.885
Q99J56	DERL1_MOUSE	Derl1	Derlin-1		0.0142294	-0.00456715	5	5	5	16.7	16.7	16.7	28.834	0	7.4652	44607000	33	23.4704	23.3105	23.3711	23.5089	23.205	NaN	23.3855	NaN
Q3U5C5	Q3U5C5_MOUSE	Apobec3	Apolipoprotein B mRNA editing enzyme, catalytic polypeptide 3		0	NaN	4	4	4	11.9	11.9	11.9	47.422	0	3.1118	4357400	4	NaN	NaN	NaN	NaN	NaN	NaN	NaN	NaN
Q99J77	SIAS_MOUSE	Nans	Sialic acid synthase		0.0909255	0.0371509	13	13	13	51.5	51.5	51.5	40.024	0	46.812	121040000	76	22.1704	21.952	21.72	21.6149	21.7164	21.6851	21.8546	22.0453
Q99J93	IFM2_MOUSE	Ifitm2	Interferon-induced transmembrane protein 2		0	NaN	2	2	1	18.1	18.1	12.5	15.743	0.0022463	1.9981	1452200	2	NaN	NaN	NaN	NaN	NaN	NaN	NaN	NaN
Q99J99	THTM_MOUSE	Mpst	3-mercaptopyruvate sulfurtransferase		0	NaN	3	3	3	12.1	12.1	12.1	33.097	0	4.3719	3248900	27	NaN	NaN	NaN	NaN	NaN	NaN	NaN	NaN
Q99JB2	STML2_MOUSE	Stoml2	Stomatin-like protein 2, mitochondrial		0.87407	0.0819063	13	13	13	38.5	38.5	38.5	38.384	0	150.07	89986000	84	22.1046	22.093	22.1028	22.1688	21.9998	21.9707	21.999	21.966
Q99JB8	PACN3_MOUSE	Pacsin3	Protein kinase C and casein kinase II substrate protein 3		0	NaN	4	4	4	12.3	12.3	12.3	48.584	0	33.371	1858000	4	NaN	NaN	NaN	NaN	NaN	NaN	NaN	NaN
Q99JF8	PSIP1_MOUSE	Psip1	PC4 and SFRS1-interacting protein		0	NaN	1	1	1	1.5	1.5	1.5	59.696	0.0011437	2.2954	7951100	10	NaN	NaN	NaN	NaN	NaN	NaN	NaN	NaN
Q99JH8	ERD21_MOUSE	Kdelr1	ER lumen protein-retaining receptor 1		0	NaN	2	2	2	12.7	12.7	12.7	24.56	0	5.0909	3364500	4	NaN	NaN	NaN	NaN	NaN	NaN	NaN	NaN
Q99JI4	PSMD6_MOUSE	Psmd6	26S proteasome non-ATPase regulatory subunit 6		0	0.20376	4	4	4	13.1	13.1	13.1	45.536	0	11.769	11812000	14	NaN	20.0617	19.8969	20.1397	NaN	NaN	NaN	NaN
Q99JI6	RAP1B_MOUSE	Rap1b	Ras-related protein Rap-1b		0.686072	0.404806	13	13	3	53.3	53.3	15.2	20.825	0	90.156	305060000	118	24.8844	24.7054	24.8951	24.946	24.7637	23.6131	24.5148	24.6572
Q99JR1	SFXN1_MOUSE	Sfxn1	Sideroflexin-1		0.281313	0.0803585	13	12	12	44.7	38.8	38.8	35.649	0	132.1	362840000	169	23.2464	23.2097	23.0059	23.1062	22.9002	23.2539	22.8188	23.0626
Q99JW5	EPCAM_MOUSE	Epcam	Epithelial cell adhesion molecule		1.07459	-0.308813	20	20	20	55.6	55.6	55.6	35.019	0	174.19	546940000	309	24.5709	24.6386	24.5512	24.4039	24.4598	24.6974	25.2014	24.8583
A2ATI9	A2ATI9_MOUSE	Gorasp2	Golgi reassembly-stacking protein 2		0.361273	-0.329921	9	9	9	32.7	32.7	32.7	45.026	0	73.192	64713000	48	21.9258	22.2338	22.2005	21.3361	20.5491	21.5557	21.8581	21.7503
Q99JX4	EIF3M_MOUSE	Eif3m	Eukaryotic translation initiation factor 3 subunit M		0	NaN	4	4	4	15.2	15.2	15.2	42.516	0	9.277	2445100	5	NaN	NaN	NaN	NaN	NaN	NaN	NaN	NaN
Q99JY0	ECHB_MOUSE	Hadhb	Trifunctional enzyme subunit beta, mitochondrial		0.478349	-0.13369	25	25	25	65.9	65.9	65.9	51.386	0	99.876	486850000	263	23.6905	23.8842	24.1683	23.5425	23.8412	23.8042	23.8004	23.7204
E9Q7A5	E9Q7A5_MOUSE	Trabd	TraB domain-containing protein (Fragment)		0.234416	-0.408687	6	6	6	40.2	40.2	40.2	26.323	0	12.782	23535000	21	NaN	19.4003	20.7849	20.8172	21.0488	NaN	20.8767	NaN
Q99JY8	PLPP3_MOUSE	Plpp3	Phospholipid phosphatase 3		0	NaN	4	4	4	15.1	15.1	15.1	35.216	0	12.757	2562200	10	NaN	NaN	NaN	NaN	NaN	NaN	NaN	NaN
Q99JY9	ARP3_MOUSE	Actr3	Actin-related protein 3		0.587307	-0.1337	18	18	18	52.4	52.4	52.4	47.357	0	120.51	136420000	127	21.9654	21.9148	22.1312	21.8185	22.1526	21.971	22.3116	21.9724
A0A0R4J034	A0A0R4J034_MOUSE	Pdxdc1	Pyridoxal-dependent decarboxylase domain-containing protein 1		0	NaN	4	4	4	9	9	9	87.479	0	7.3827	11641000	16	NaN	NaN	20.6015	NaN	NaN	20.9068	20.2358	NaN
Q99K23	UFSP2_MOUSE	Ufsp2	Ufm1-specific protease 2		1.01389	-0.0825682	22	22	22	57	57	57	52.515	0	85.953	317210000	161	22.8024	22.8344	22.8503	22.8354	22.9201	22.9242	22.9335	23.0145
Q99K30	ES8L2_MOUSE	Eps8l2	Epidermal growth factor receptor kinase substrate 8-like protein 2		0	NaN	4	4	4	8.1	8.1	8.1	82.228	0	9.5045	1992800	4	NaN	NaN	NaN	NaN	NaN	NaN	NaN	NaN
Q99K67	AASS_MOUSE	Aass	Alpha-aminoadipic semialdehyde synthase, mitochondrial		0	NaN	1	1	1	1.1	1.1	1.1	102.97	0	2.9989	838430	4	NaN	NaN	NaN	NaN	NaN	NaN	NaN	NaN
Q99K70	RRAGC_MOUSE	Rragc	Ras-related GTP-binding protein C		0	NaN	4	4	4	19.6	19.6	19.6	44.12	0	46.656	6978600	10	NaN	NaN	19.9426	NaN	NaN	20.2839	18.8707	18.78
Q99K85	SERC_MOUSE	Psat1	Phosphoserine aminotransferase		0	NaN	3	3	3	9.2	9.2	9.2	40.472	0	6.532	4126100	10	NaN	NaN	NaN	NaN	NaN	NaN	NaN	NaN
E9Q2H8	E9Q2H8_MOUSE	Hagh	Hydroxyacylglutathione hydrolase, mitochondrial (Fragment)		0	NaN	3	3	3	16.6	16.6	16.6	23.756	0	5.9536	2559800	9	NaN	NaN	NaN	NaN	NaN	NaN	NaN	NaN
Q99KC8	VMA5A_MOUSE	Vwa5a	von Willebrand factor A domain-containing protein 5A		0	-0.158491	4	4	4	6.2	6.2	6.2	87.142	0	14.169	3267000	9	NaN	NaN	NaN	NaN	19.2619	NaN	19.4204	NaN
Q99KF1	TMED9_MOUSE	Tmed9	Transmembrane emp24 domain-containing protein 9		0.420321	-0.0584846	18	18	16	50.2	50.2	47.2	27.127	0	157.25	1080400000	344	24.8457	24.8741	24.767	24.629	24.7067	24.8581	24.8112	24.8531
D3YYU9	D3YYU9_MOUSE	Lsr	Lipolysis-stimulated lipoprotein receptor (Fragment)		0	NaN	1	1	1	4	4	4	30.362	0	3.8755	1767400	4	NaN	NaN	NaN	NaN	NaN	NaN	NaN	NaN
Q99KI0	ACON_MOUSE	Aco2	Aconitate hydratase, mitochondrial		0.0617476	0.0244222	49	49	45	64.7	64.7	61	85.462	0	323.31	1698700000	628	24.1673	23.912	23.869	23.8483	24.221	24.2356	23.7993	24.147
Q99KI3	EMC3_MOUSE	Emc3	ER membrane protein complex subunit 3		0.0404644	-0.0122423	6	6	6	23.8	23.8	23.8	29.98	0	108.22	75190000	41	21.5671	21.5483	21.6626	21.7823	21.9616	21.7842	21.66	21.8014
Q99KJ8	DCTN2_MOUSE	Dctn2	Dynactin subunit 2		0	NaN	2	2	2	7.7	7.7	7.7	44.116	0	18.463	2812800	3	NaN	NaN	NaN	NaN	NaN	NaN	NaN	NaN
Q99KK1	REEP3_MOUSE	Reep3	Receptor expression-enhancing protein 3		0.031687	0.0270805	3	3	3	13.8	13.8	13.8	29.213	0	17.836	10643000	19	NaN	NaN	19.4247	19.3691	19.8267	NaN	19.7169	NaN
Q99KK7	DPP3_MOUSE	Dpp3	Dipeptidyl peptidase 3		0	NaN	3	3	3	6.5	6.5	6.5	82.897	0	9.2695	3313300	3	NaN	NaN	NaN	NaN	NaN	NaN	NaN	NaN
Q99KQ4	NAMPT_MOUSE	Nampt	Nicotinamide phosphoribosyltransferase		0.915005	-0.625111	9	9	9	24.4	24.4	24.4	55.446	0	48.033	45528000	36	21.1853	19.9089	21.0387	21.2209	21.077	21.5763	21.6759	21.6016
Q99KU0	VMP1_MOUSE	Vmp1	Vacuole membrane protein 1		0.628201	0.762564	3	3	3	13.1	13.1	13.1	45.96	0	15.608	36877000	46	20.8705	20.8413	20.706	21.1765	20.7638	18.4407	20.6367	20.8185
Q99KV1	DJB11_MOUSE	Dnajb11	DnaJ homolog subfamily B member 11		1.1968	-0.31622	12	12	12	33.5	33.5	33.5	40.555	0	176.55	322500000	154	23.0065	22.5544	23.136	22.7268	23.0706	23.3396	23.0042	23.1434
Q99KW9	TIP_MOUSE	Itfg1	T-cell immunomodulatory protein		0	NaN	3	3	3	3.9	3.9	3.9	67.464	0	4.2934	5461700	11	NaN	NaN	NaN	NaN	NaN	NaN	19.7024	19.4034
Q99L04	DHRS1_MOUSE	Dhrs1	Dehydrogenase/reductase SDR family member 1		0.975093	0.239283	11	11	11	33.2	33.2	33.2	34.005	0	30.355	89740000	111	21.4794	21.5827	21.6817	21.7503	21.6277	21.3482	21.1448	21.3083
Q99L13	3HIDH_MOUSE	Hibadh	3-hydroxyisobutyrate dehydrogenase, mitochondrial		0.103219	0.0386629	8	8	8	36.4	36.4	36.4	35.44	0	72.958	92598000	62	22.6908	22.3166	22.3043	22.1695	22.6797	22.4398	22.4997	22.4581
A2AMQ5	A2AMQ5_MOUSE	Cds2	Phosphatidate cytidylyltransferase		0	NaN	3	3	3	12.2	12.2	12.2	49.293	0	49.117	16035000	16	NaN	NaN	NaN	NaN	NaN	20.9836	20.6113	21.6282
Q99L45	IF2B_MOUSE	Eif2s2	Eukaryotic translation initiation factor 2 subunit 2		0.540994	-0.287206	11	11	11	33.8	33.8	33.8	38.092	0	62.465	15202000	47	19.8006	NaN	19.8221	20.0084	19.2119	19.9196	20.2971	19.8045
Q99L47	F10A1_MOUSE	St13	Hsc70-interacting protein		0	NaN	3	3	3	10.2	10.2	10.2	41.655	0	10.245	11495000	13	NaN	NaN	20.045	NaN	NaN	20.4058	20.4488	20.3339
Q99LB2	DHRS4_MOUSE	Dhrs4	Dehydrogenase/reductase SDR family member 4		0.816226	0.514263	7	7	7	26.5	26.5	26.5	29.884	0	16.602	17474000	20	20.6115	20.6912	NaN	21.344	21.0462	20.7633	19.8669	20.5967
Q99LB7	SARDH_MOUSE	Sardh	Sarcosine dehydrogenase, mitochondrial		0.343858	0.376694	12	12	12	14.5	14.5	14.5	101.68	0	29.416	22918000	27	20.0682	NaN	NaN	NaN	20.6412	20.5577	19.7942	19.5821
Q99LC3	NDUAA_MOUSE	Ndufa10	NADH dehydrogenase [ubiquinone] 1 alpha subcomplex subunit 10, mitochondrial		0.792462	0.223289	27	27	27	73.2	73.2	73.2	40.603	0	188.6	843510000	317	25.4986	25.4482	25.5796	25.3153	25.4947	25.1162	24.951	25.2168
Q99LC5	ETFA_MOUSE	Etfa	Electron transfer flavoprotein subunit alpha, mitochondrial		0.213092	-0.0402455	17	17	17	55.3	55.3	55.3	35.009	0	152.5	402370000	240	23.9121	23.81	23.8814	23.5919	23.8623	23.7621	23.8644	23.8294
Q99LD4	CSN1_MOUSE	Gps1	COP9 signalosome complex subunit 1		0	NaN	3	3	3	8.5	8.5	8.5	53.442	0	7.6184	1394500	6	NaN	NaN	NaN	NaN	NaN	NaN	NaN	NaN
Q99LD8	DDAH2_MOUSE	Ddah2	N(G),N(G)-dimethylarginine dimethylaminohydrolase 2		0	NaN	2	2	2	9.1	9.1	9.1	29.645	0	10.373	2412500	6	NaN	NaN	NaN	NaN	NaN	17.8153	18.2979	NaN
Q99LE6	ABCF2_MOUSE	Abcf2	ATP-binding cassette sub-family F member 2		0	NaN	1	1	1	3.2	3.2	3.2	71.781	0.0033582	1.9607	267670	1	NaN	NaN	NaN	NaN	NaN	NaN	NaN	NaN
Q99LF4	RTCB_MOUSE	Rtcb	RNA-splicing ligase RtcB homolog		0	NaN	3	3	3	6.5	6.5	6.5	55.249	0	34.614	4919900	14	NaN	NaN	NaN	NaN	NaN	NaN	NaN	NaN
A2AEM2	A2AEM2_MOUSE	Clcc1	Chloride channel CLIC-like protein 1		0.188894	-0.068882	11	11	11	27.4	27.4	27.4	61.239	0	55.144	55009000	120	20.8674	20.4844	21.0992	20.9969	20.9894	20.9538	20.7643	20.7962
Q99LJ8	NGBR_MOUSE	Nus1	Dehydrodolichyl diphosphate synthase complex subunit Nus1		0	NaN	2	2	2	7.7	7.7	7.7	33.485	0	5.5981	1236200	3	NaN	NaN	NaN	NaN	NaN	NaN	NaN	NaN
Q99LM2	CK5P3_MOUSE	Cdk5rap3	CDK5 regulatory subunit-associated protein 3		0.113856	0.0393624	22	22	22	46.9	46.9	46.9	56.99	0	68.076	204070000	176	22.2363	22.0899	22.1373	21.9259	21.9778	21.8188	21.8535	22.2628
Q99LP6	GRPE1_MOUSE	Grpel1	GrpE protein homolog 1, mitochondrial		0.133996	0.0804915	6	6	6	41.9	41.9	41.9	24.307	0	14.454	22852000	27	19.9977	19.8808	19.802	20.1365	20.3143	20.4398	19.5283	20.2371
Q99LQ7	PDES1_MOUSE	PEDS1	Plasmanylethanolamine desaturase		0	NaN	2	1	1	14	5.5	5.5	31.133	0.0058716	1.8172	358790	1	NaN	NaN	NaN	NaN	NaN	NaN	NaN	NaN
Q99LR1	ABD12_MOUSE	Abhd12	Lysophosphatidylserine lipase ABHD12		1.19538	0.691138	10	10	10	30.7	30.7	30.7	45.269	0	22.35	49375000	49	22.6367	22.2713	22.5052	22.6189	22.2169	21.3157	21.8507	21.3076
Q99LX0	PARK7_MOUSE	Park7	Parkinson disease protein 7 homolog		1.75462	-0.449221	7	7	7	47.1	47.1	47.1	20.021	0	23.287	50371000	44	21.8112	21.69	22.0692	21.4559	21.4616	22.2994	21.7768	22.0702
B1ARW4	B1ARW4_MOUSE	Ndufs5	Complex I-15 kDa (Fragment)		0.299074	0.13075	6	6	6	57.1	57.1	57.1	10.909	0	14.299	91136000	67	22.7504	22.5204	22.8841	22.4947	22.4026	22.2004	22.1481	22.4126
Q99M08	CD003_MOUSE	1 SV=1	Uncharacterized protein C4orf3 homolog		0	NaN	1	1	1	24.6	24.6	24.6	7.4043	0.0033595	1.9653	1472200	2	NaN	NaN	NaN	NaN	NaN	NaN	NaN	NaN
Q99M87	DNJA3_MOUSE	Dnaja3	DnaJ homolog subfamily A member 3, mitochondrial		0.263339	-0.262396	4	4	4	9.2	9.2	9.2	52.443	0	10.964	11551000	18	19.6107	19.4279	19.7456	NaN	NaN	20.3084	NaN	19.291
Q99MB1	TLR3_MOUSE	Tlr3	Toll-like receptor 3		0	0.00369072	8	8	8	10.2	10.2	10.2	103.67	0	19.711	9534500	18	19.7021	NaN	19.6984	NaN	NaN	NaN	NaN	NaN
D3YZ89	D3YZ89_MOUSE	Mtfr1	Mitochondrial fission regulator 1 (Fragment)		0	NaN	1	1	1	6	6	6	18.59	0	2.6468	1108400	2	NaN	NaN	NaN	NaN	NaN	NaN	NaN	NaN
V9GX53	V9GX53_MOUSE	Erc1	ELKS/Rab6-interacting/CAST family member 1		0	NaN	1	1	1	3.2	3.2	3.2	82.008	0.0058673	1.8072	3857900	1	NaN	NaN	NaN	NaN	NaN	NaN	NaN	NaN
Q99MN1	SYK_MOUSE	Kars1	Lysine--tRNA ligase		1.42609	-0.873416	14	14	14	25.9	25.9	25.9	67.839	0	98.344	50281000	57	20.4738	19.9324	20.4022	19.9239	20.1492	20.7277	21.8132	21.03
Q99MN9	PCCB_MOUSE	Pccb	Propionyl-CoA carboxylase beta chain, mitochondrial		0.271007	0.0753913	16	16	16	38.4	38.4	38.4	58.408	0	190.96	142240000	121	22.3331	22.1888	22.2441	22.0174	22.4225	21.958	22.2871	22.1708
Q99MQ4	ASPN_MOUSE	Aspn	Asporin		0.872167	-0.240672	6	6	6	20.9	20.9	20.9	42.572	0	15.354	18034000	18	21.3122	21.2343	21.3836	21.3317	NaN	NaN	21.6832	NaN
Q99MR8	MCCA_MOUSE	Mccc1	Methylcrotonoyl-CoA carboxylase subunit alpha, mitochondrial		0.229216	-0.0905919	24	24	24	37.9	37.9	37.9	79.343	0	109.71	146620000	137	21.8654	21.5684	21.4125	21.2969	21.664	21.9276	21.7435	21.6734
Q99MY8	ASH1L_MOUSE	Ash1l	Histone-lysine N-methyltransferase ASH1L		0	NaN	2	2	2	0.7	0.7	0.7	331.33	0.0072595	1.7264	1806900	5	NaN	NaN	NaN	NaN	NaN	NaN	NaN	NaN
Q3UXD9	Q3UXD9_MOUSE	Pecr	Peroxisomal trans-2-enoyl-CoA reductase		0	-0.277633	4	4	4	16.2	16.2	16.2	28.095	0	10.617	10149000	13	19.7141	NaN	NaN	NaN	NaN	20.2776	19.574	20.1236
Q99N80	SYTL1_MOUSE	Sytl1	Synaptotagmin-like protein 1		0	NaN	1	1	1	1.9	1.9	1.9	62.361	0.0003885	2.5594	143640	2	NaN	NaN	NaN	NaN	NaN	NaN	NaN	NaN
G3UYQ9	G3UYQ9_MOUSE	Mrps18b	28S ribosomal protein S18b, mitochondrial (Fragment)		0	NaN	1	1	1	9.4	9.4	9.4	12.034	0	3.001	4249200	8	NaN	NaN	NaN	NaN	NaN	NaN	NaN	NaN
Q99N87	RT05_MOUSE	Mrps5	28S ribosomal protein S5, mitochondrial		0	NaN	3	3	3	8.6	8.6	8.6	48.206	0	6.8437	2112200	5	NaN	NaN	NaN	NaN	NaN	18.1534	NaN	18.1657
Q5RL20	Q5RL20_MOUSE	Mrpl43	39S ribosomal protein L43, mitochondrial		0	NaN	3	3	3	15.7	15.7	15.7	17.877	0	4.9975	7624900	10	NaN	NaN	NaN	NaN	NaN	19.2937	NaN	19.7457
Q99N91	RM34_MOUSE	Mrpl34	39S ribosomal protein L34, mitochondrial		0	NaN	1	1	1	10.9	10.9	10.9	10.531	0	3.166	1149300	6	NaN	NaN	NaN	NaN	NaN	NaN	NaN	NaN
Q99N92	RM27_MOUSE	Mrpl27	39S ribosomal protein L27, mitochondrial		0	NaN	2	2	2	18.9	18.9	18.9	15.944	0	6.3208	9302900	5	NaN	NaN	NaN	NaN	NaN	NaN	NaN	NaN
Q99N94	RM09_MOUSE	Mrpl9	39S ribosomal protein L9, mitochondrial		0	NaN	4	4	4	17	17	17	30.244	0	5.494	11709000	16	NaN	NaN	NaN	NaN	NaN	19.9686	20.483	20.4528
D3Z456	D3Z456_MOUSE	Mrpl3	39S ribosomal protein L3, mitochondrial		0	NaN	3	3	3	12.5	12.5	12.5	33.994	0	18.658	4871200	6	NaN	NaN	NaN	NaN	NaN	20.1203	20.0232	20.0445
Q99N96	RM01_MOUSE	Mrpl1	39S ribosomal protein L1, mitochondrial		0	NaN	3	3	3	11	11	11	37.596	0	6.7427	1704200	3	NaN	NaN	NaN	NaN	NaN	NaN	NaN	NaN
Q99NB1	ACS2L_MOUSE	Acss1	Acetyl-coenzyme A synthetase 2-like, mitochondrial		0.10037	0.0585966	22	22	22	36.8	36.8	36.8	74.622	0	57.72	169730000	130	22.6441	22.4744	22.0662	21.839	22.6423	22.3801	22.3996	22.5195
Q99P30	NUDT7_MOUSE	Nudt7	Peroxisomal coenzyme A diphosphatase NUDT7		0	NaN	2	2	2	10.2	10.2	10.2	26.856	0	2.6052	1788800	2	NaN	NaN	NaN	NaN	NaN	NaN	NaN	NaN
D6RI95	D6RI95_MOUSE	Slc29a3	Equilibrative nucleoside transporter 3		0	NaN	1	1	1	10.3	10.3	10.3	17.54	0	3.7136	2079800	3	NaN	NaN	NaN	NaN	NaN	NaN	NaN	NaN
Q99P72	RTN4_MOUSE	Rtn4	Reticulon-4		0.774282	0.369587	9	9	9	11.8	11.8	11.8	126.61	0	47	175450000	98	22.4429	23.1396	22.1449	23.0131	23.1007	22.7736	22.4082	22.8911
A2AVJ7	A2AVJ7_MOUSE	Rrbp1	Ribosome-binding protein 1		0.839356	-0.194366	100	100	100	62.8	62.8	62.8	158.39	0	323.31	3685900000	1778	27.5216	27.5125	27.4006	27.1983	27.1566	27.5101	27.6964	27.5593
Q99PT1	GDIR1_MOUSE	Arhgdia	Rho GDP-dissociation inhibitor 1		0.421782	-0.150504	9	9	9	60.3	60.3	60.3	23.407	0	55.012	135150000	78	23.0349	23.076	23.1325	22.6388	22.9846	23.1918	22.7278	23.2842
Q9BCZ4	SELS_MOUSE	Selenos	Selenoprotein S		1.4436	-0.4179	8	8	8	52.1	52.1	52.1	21.509	0	96.627	76399000	76	20.6594	21.2461	21.2991	20.8132	21.0033	21.33	21.1676	21.597
Q9CPP6	NDUA5_MOUSE	Ndufa5	NADH dehydrogenase [ubiquinone] 1 alpha subcomplex subunit 5		0.746662	-0.180475	8	8	8	61.2	61.2	61.2	13.36	0	87.929	233330000	176	23.4593	23.0559	23.3657	23.0294	23.2226	23.2427	23.327	23.5536
Q9CPQ1	COX6C_MOUSE	Cox6c	Cytochrome c oxidase subunit 6C		1.17131	0.484985	8	8	8	56.6	56.6	56.6	8.4689	0	12.718	1270200000	521	25.883	25.7608	25.8367	25.6031	25.8385	25.3434	24.8555	25.1098
Q9CPQ3	TOM22_MOUSE	Tomm22	Mitochondrial import receptor subunit TOM22 homolog		0.0115877	-0.0102005	5	5	5	56.3	56.3	56.3	15.537	0	190.88	93777000	74	22.008	22.1803	22.1582	22.2948	21.8849	22.4904	21.287	22.4732
Q9CPQ8	ATP5L_MOUSE	Atp5mg	ATP synthase subunit g, mitochondrial		0.56805	0.178375	7	7	7	77.7	77.7	77.7	11.424	0	44.687	906080000	253	26.1036	26.3607	25.9423	25.9088	26.306	26.2999	25.8756	25.8479
Q9CPR4	RL17_MOUSE	Rpl17	60S ribosomal protein L17		0.640966	-0.305405	18	18	18	69.6	69.6	69.6	21.423	0	98.489	1631200000	505	24.4819	24.7575	24.7873	25.0881	24.4439	25.1703	25.3925	24.6428
Q9CPR5	RM15_MOUSE	Mrpl15	39S ribosomal protein L15, mitochondrial		0	NaN	3	3	3	11.2	11.2	11.2	33.541	0	3.9685	1520200	3	NaN	NaN	NaN	NaN	NaN	NaN	NaN	NaN
Q9CPR7	SIKE1_MOUSE	Sike1	Suppressor of IKBKE 1		0	-0.378615	3	3	3	19.3	19.3	19.3	23.522	0	8.5807	2424600	5	NaN	17.9175	NaN	NaN	NaN	18.2563	NaN	18.336
E9Q7F8	E9Q7F8_MOUSE	Hint3	Histidine triad nucleotide-binding protein 3 (Fragment)		0	NaN	1	1	1	17.4	17.4	17.4	9.4996	0	4.275	301880	1	NaN	NaN	NaN	NaN	NaN	NaN	NaN	NaN
Q9CPT4	MYDGF_MOUSE	Mydgf	Myeloid-derived growth factor		0.714251	-0.164226	6	6	6	30.7	30.7	30.7	17.982	0	18.461	93718000	71	22.3274	22.0404	22.3579	22.2678	21.9647	22.4907	22.175	22.2335
Q9CPU0	LGUL_MOUSE	Glo1	Lactoylglutathione lyase		0	NaN	3	3	3	18.5	18.5	18.5	20.809	0	3.838	2135200	3	NaN	NaN	NaN	NaN	NaN	NaN	NaN	NaN
Q9CPU2	NDUB2_MOUSE	Ndufb2	NADH dehydrogenase [ubiquinone] 1 beta subcomplex subunit 2, mitochondrial		0	-0.419664	1	1	1	8.6	8.6	8.6	11.967	0	2.7805	64386000	36	NaN	NaN	NaN	NaN	22.6256	23.7686	22.1351	23.232
Q9CPU4	MGST3_MOUSE	Mgst3	Microsomal glutathione S-transferase 3		0.583248	-0.508893	4	4	4	32.7	32.7	32.7	16.958	0	16.474	60576000	29	22.4181	21.7643	23.4676	NaN	22.0332	22.0241	22.5066	22.3246
Q9CPV4	GLOD4_MOUSE	Glod4	Glyoxalase domain-containing protein 4		0.396995	0.132398	9	9	9	31.2	31.2	31.2	33.316	0	32.277	33170000	45	21.6039	21.5107	21.452	21.4825	21.028	21.157	21.168	21.3183
Q9CPW3	RM54_MOUSE	Mrpl54	39S ribosomal protein L54, mitochondrial		0	NaN	2	2	2	29.6	29.6	29.6	15.422	0	5.5707	3138800	5	NaN	NaN	NaN	NaN	NaN	NaN	NaN	NaN
Q9CPW4	ARPC5_MOUSE	Arpc5	Actin-related protein 2/3 complex subunit 5		0.170935	0.109737	3	3	3	43	43	43	16.288	0	27.771	33252000	25	21.7877	22.0991	21.4959	NaN	NaN	21.9368	22.1892	21.7127
Q9CPX6	ATG3_MOUSE	Atg3	Ubiquitin-like-conjugating enzyme ATG3		0	NaN	1	1	1	4.1	4.1	4.1	35.796	0	5.5848	1173700	3	NaN	NaN	NaN	NaN	NaN	NaN	NaN	NaN
Q9CPX8	QCR10_MOUSE	Uqcr11	Cytochrome b-c1 complex subunit 10		0	NaN	1	1	1	21.4	21.4	21.4	6.5386	0	5.0508	41605000	4	NaN	NaN	NaN	NaN	NaN	NaN	NaN	NaN
Q9CPY7	AMPL_MOUSE	Lap3	Cytosol aminopeptidase		0.319126	-0.14131	14	14	14	33.1	33.1	33.1	56.141	0	42.162	67287000	71	21.7881	21.5441	21.3654	21.6787	21.3922	22.0779	21.5643	21.9606
Q9CPZ6	ORML3_MOUSE	Ormdl3	ORM1-like protein 3		1.00949	0.467957	3	3	2	28.8	28.8	21.6	17.476	0	21.673	44694000	39	21.4287	21.3854	21.2902	21.0963	22.0662	20.6989	21.0117	21.104
Q9CQ06	RM24_MOUSE	Mrpl24	39S ribosomal protein L24, mitochondrial		0	NaN	1	1	1	4.6	4.6	4.6	24.944	0	3.6388	6625700	11	NaN	NaN	NaN	NaN	NaN	NaN	NaN	NaN
Q9CQ19	MYL9_MOUSE	Myl9	Myosin regulatory light polypeptide 9		0	NaN	8	5	5	52.3	29.7	29.7	19.854	0	15.442	29285000	14	NaN	NaN	NaN	NaN	NaN	21.5161	21.4691	21.871
Q9CQ22	LTOR1_MOUSE	Lamtor1	Ragulator complex protein LAMTOR1		0.675675	-0.0997133	7	7	7	74.5	74.5	74.5	17.749	0	27.446	127690000	69	22.0863	22.1617	22.2276	22.029	22.2536	22.1542	22.3809	22.1668
Q9CQ40	RM49_MOUSE	Mrpl49	39S ribosomal protein L49, mitochondrial		0	NaN	1	1	1	8.4	8.4	8.4	19.133	0	5.6393	1140800	1	NaN	NaN	NaN	NaN	NaN	NaN	NaN	NaN
Q9CQ45	NENF_MOUSE	Nenf	Neudesin		0	-0.362781	4	4	4	31	31	31	18.904	0	37.875	13596000	17	NaN	19.8969	19.9476	19.3371	19.5205	NaN	NaN	NaN
Q9CQ54	NDUC2_MOUSE	Ndufc2	NADH dehydrogenase [ubiquinone] 1 subunit C2		0.795939	-0.139473	7	7	7	45	45	45	14.164	0	22.729	141580000	98	22.8411	22.6858	22.6601	22.5121	22.6434	22.799	22.8945	22.8868
Q9CQ56	USE1_MOUSE	Use1	Vesicle transport protein USE1		0.368654	0.505746	6	6	6	24.8	24.8	24.8	30.593	0	17.517	43160000	35	21.8477	21.5181	22.0364	21.8017	22.2378	NaN	21.9924	20.0079
Q9CQ60	6PGL_MOUSE	Pgls	6-phosphogluconolactonase		0	NaN	6	6	6	35.4	35.4	35.4	27.254	0	10.859	15533000	18	NaN	NaN	NaN	NaN	NaN	20.3239	20.3837	19.5982
Q9CQ62	DECR_MOUSE	Decr1	2,4-dienoyl-CoA reductase, mitochondrial		0.791219	0.530918	5	5	5	21.5	21.5	21.5	36.213	0	19.611	40853000	31	22.0245	22.726	22.0256	22.1089	21.7921	20.9636	22.0955	21.443
Q9CQ69	QCR8_MOUSE	Uqcrq	Cytochrome b-c1 complex subunit 8		1.4171	-0.43502	8	8	8	80.5	80.5	80.5	9.7681	0	22.693	247810000	195	23.6817	23.831	23.7412	23.4658	23.4679	23.8963	24.3446	24.2043
Q9CQ75	NDUA2_MOUSE	Ndufa2	NADH dehydrogenase [ubiquinone] 1 alpha subcomplex subunit 2		0.499617	-0.176745	10	10	10	71.7	71.7	71.7	10.916	0	41.109	229740000	146	23.4869	23.3091	23.9704	23.4033	23.5082	23.7481	23.3892	23.3069
E9PXB9	E9PXB9_MOUSE	Timm22	Mitochondrial import inner membrane translocase subunit Tim22		0	NaN	1	1	1	16.7	16.7	16.7	9.2296	0	3.5175	8434800	10	NaN	NaN	NaN	NaN	NaN	NaN	NaN	NaN
Q9CQ88	TSN31_MOUSE	Tspan31	Tetraspanin-31		0	0.0498689	2	2	2	10.5	10.5	10.5	22.694	0	7.7482	6346200	24	18.9832	NaN	NaN	NaN	NaN	18.6458	19.4069	18.7472
Q9CQ91	NDUA3_MOUSE	Ndufa3	NADH dehydrogenase [ubiquinone] 1 alpha subcomplex subunit 3		0.393753	0.537671	3	3	3	50	50	50	9.3308	0	5.423	40760000	25	NaN	22.6123	22.5303	NaN	21.9257	22.0126	20.8473	21.5353
Q9CQ92	FIS1_MOUSE	Fis1	Mitochondrial fission 1 protein		0.0220348	0.00894737	7	7	7	48	48	48	17.008	0	60.065	52592000	92	21.7496	21.603	22.08	21.7978	21.8128	21.4538	21.6729	21.7209
Q9CQA1	TPPC5_MOUSE	Trappc5	Trafficking protein particle complex subunit 5		0	NaN	1	1	1	5.3	5.3	5.3	20.795	0.0058565	1.7991	440670	1	NaN	NaN	NaN	NaN	NaN	NaN	NaN	NaN
Q9CQA3	SDHB_MOUSE	Sdhb	Succinate dehydrogenase [ubiquinone] iron-sulfur subunit, mitochondrial		1.04909	0.214611	23	23	23	61.3	61.3	61.3	31.814	0	76.364	614820000	303	24.3086	24.4292	24.3701	24.3308	24.5111	24.3023	23.957	24.0918
Q9CQB5	CISD2_MOUSE	Cisd2	CDGSH iron-sulfur domain-containing protein 2		0.035197	-0.013618	9	9	9	49.6	49.6	49.6	15.242	0	47.252	200930000	110	22.6096	22.8735	22.6373	22.7609	22.8867	22.5809	23.0909	22.8761
Q9CQC6	BZW1_MOUSE	Bzw1	Basic leucine zipper and W2 domain-containing protein 1		0	NaN	1	1	1	2.6	2.6	2.6	48.043	0	2.7434	1904400	7	NaN	NaN	NaN	NaN	NaN	NaN	NaN	NaN
Q9CQC7	NDUB4_MOUSE	Ndufb4	NADH dehydrogenase [ubiquinone] 1 beta subcomplex subunit 4		0.868201	-0.34351	10	10	10	54.3	54.3	54.3	15.081	0	32.419	329620000	141	23.5561	23.3207	23.3294	23.0634	23.1433	23.8577	23.3255	23.945
Q9CQC9	SAR1B_MOUSE	Sar1b	GTP-binding protein SAR1b		0	NaN	4	2	2	25.8	15.7	15.7	22.382	0	3.3704	18545000	16	NaN	NaN	21.037	NaN	NaN	20.1044	21.7317	19.9408
Q9CQD1	RAB5A_MOUSE	Rab5a	Ras-related protein Rab-5A		0.0121205	-0.0104909	7	4	4	41.9	27	27	23.598	0	33.454	27643000	40	21.4282	21.4082	21.2693	20.3044	21.2713	20.7872	21.1255	21.2722
Q9CQE1	NPS3B_MOUSE	Nipsnap3b	Protein NipSnap homolog 3B		0	NaN	6	6	6	39.3	39.3	39.3	28.308	0	21.103	24004000	16	NaN	NaN	NaN	NaN	NaN	NaN	NaN	NaN
Q9CQE3	RT17_MOUSE	Mrps17	28S ribosomal protein S17, mitochondrial		0	NaN	1	1	1	20	20	20	13.382	0	10.58	2754100	2	NaN	NaN	NaN	NaN	NaN	NaN	NaN	NaN
Q9CQE7	ERGI3_MOUSE	Ergic3	Endoplasmic reticulum-Golgi intermediate compartment protein 3		1.47968	0.50737	8	8	8	18.8	18.8	18.8	43.208	0	23.229	107610000	78	22.789	22.8222	22.8231	22.915	22.8881	22.2583	22.3596	21.9438
Q9CQE8	RTRAF_MOUSE	RTRAF	RNA transcription, translation and transport factor protein		0	NaN	1	1	1	3.7	3.7	3.7	28.152	0	2.9593	2204300	3	NaN	NaN	NaN	NaN	NaN	NaN	NaN	NaN
Q9CQF0	RM11_MOUSE	Mrpl11	39S ribosomal protein L11, mitochondrial		0	NaN	3	3	3	12	12	12	20.68	0	12.447	4993200	12	NaN	NaN	NaN	NaN	NaN	NaN	NaN	NaN
Q9CQF9	PCYOX_MOUSE	Pcyox1	Prenylcysteine oxidase		0.0430593	-0.013998	17	17	17	44.4	44.4	44.4	56.494	0	145.64	329080000	187	23.1794	23.4096	23.3809	23.1693	23.6402	23.3716	23.393	23.3091
Q9CQH0	PDZ1I_MOUSE	Pdzk1ip1	PDZK1-interacting protein 1		0	NaN	2	2	2	12.3	12.3	12.3	12.298	0	5.2765	2614400	10	NaN	NaN	NaN	NaN	NaN	NaN	NaN	NaN
Q9CQH3	NDUB5_MOUSE	Ndufb5	NADH dehydrogenase [ubiquinone] 1 beta subcomplex subunit 5, mitochondrial		0.197827	0.0814195	9	9	9	33.9	33.9	33.9	21.71	0	34.97	203490000	100	22.77	22.4208	22.8401	22.8338	22.7102	22.7786	22.2476	22.5429
Q9CQI3	GMFB_MOUSE	Gmfb	Glia maturation factor beta		0	NaN	3	3	3	25.4	25.4	25.4	16.723	0	5.3705	2707400	9	NaN	NaN	NaN	NaN	NaN	18.8143	NaN	19.0517
Q9CQI6	COTL1_MOUSE	Cotl1	Coactosin-like protein		0.86566	0.17835	5	5	5	40.8	40.8	40.8	15.944	0	10.463	33459000	31	20.5069	20.2616	20.4263	20.3275	20.5987	20.0946	20.2312	20.2292
Q9CQJ1	HIG2A_MOUSE	Higd2a	HIG1 domain family member 2A		0	NaN	1	1	1	34.9	34.9	34.9	11.368	0.001145	2.3113	825760	1	NaN	NaN	NaN	NaN	NaN	NaN	NaN	NaN
E9Q0G1	E9Q0G1_MOUSE	Denr	Density-regulated protein (Fragment)		0	NaN	1	1	1	9.3	9.3	9.3	20.396	0	14.11	3216000	6	NaN	NaN	NaN	NaN	NaN	NaN	NaN	NaN
Q9CQJ8	NDUB9_MOUSE	Ndufb9	NADH dehydrogenase [ubiquinone] 1 beta subcomplex subunit 9		0.698611	0.235823	9	9	9	68.7	68.7	68.7	21.984	0	50.93	316970000	173	24.8783	24.7342	24.9481	24.8086	24.859	24.7609	24.3063	24.3216
V9GXI7	V9GXI7_MOUSE	Mrpl20	39S ribosomal protein L20, mitochondrial		0	NaN	1	1	1	9.8	9.8	9.8	13.081	0	3.927	915950	1	NaN	NaN	NaN	NaN	NaN	NaN	NaN	NaN
Q9CQL5	RM18_MOUSE	Mrpl18	39S ribosomal protein L18, mitochondrial		0	NaN	3	3	3	13.9	13.9	13.9	20.677	0	5.2132	2607300	3	NaN	NaN	NaN	NaN	NaN	NaN	NaN	NaN
Q9CQM5	TXD17_MOUSE	Txndc17	Thioredoxin domain-containing protein 17		0	NaN	2	2	2	18.7	18.7	18.7	14.015	0	3.1458	3051700	5	NaN	NaN	NaN	NaN	NaN	NaN	NaN	NaN
A0A1B0GS58	A0A1B0GS58_MOUSE	Glrx3	Glutaredoxin-3		0	0.426701	3	3	3	9.9	9.9	9.9	41.704	0	12.325	6527700	14	19.6564	NaN	NaN	NaN	NaN	19.1989	NaN	19.2605
Q9CQN1	TRAP1_MOUSE	Trap1	Heat shock protein 75 kDa, mitochondrial		0.108771	0.0634421	9	9	9	14.6	14.6	14.6	80.208	0	42.5	22428000	33	20.4527	NaN	20.0862	20.27	20.1693	20.7426	20.0079	20.0989
Q9CQN3	TOM6_MOUSE	Tomm6	Mitochondrial import receptor subunit TOM6 homolog		0	NaN	3	3	3	70.3	70.3	70.3	7.8648	0	2.6831	13491000	6	NaN	NaN	NaN	NaN	NaN	NaN	NaN	NaN
Q9CQN6	TM14C_MOUSE	Tmem14c	Transmembrane protein 14C		0	NaN	1	1	1	9.6	9.6	9.6	11.642	0	3.9606	37621000	21	NaN	NaN	NaN	NaN	NaN	NaN	NaN	NaN
Q9CQN7	RM41_MOUSE	Mrpl41	39S ribosomal protein L41, mitochondrial		1.03426	0.630163	3	3	3	24.4	24.4	24.4	15.261	0	8.1717	11167000	15	19.7147	20.0552	19.5561	NaN	NaN	NaN	18.9529	19.2554
Q9CQQ7	AT5F1_MOUSE	Atp5pb	ATP synthase F(0) complex subunit B1, mitochondrial		0.307057	-0.109034	22	22	22	60.2	60.2	60.2	28.948	0	131.43	2439900000	681	27.8677	27.7754	27.6551	27.9766	28.1122	28.224	28.1218	28.1672
Q9CQR2	RS21_MOUSE	Rps21	40S ribosomal protein S21		0.896701	0.213212	10	10	10	72.3	72.3	72.3	9.1413	0	80.916	1264000000	554	24.913	24.9931	24.438	25.0158	24.9097	24.8982	24.9546	24.688
Q9CQR4	ACO13_MOUSE	Acot13	Acyl-coenzyme A thioesterase 13		0.135391	-0.0651836	4	4	4	32.1	32.1	32.1	15.183	0	16.793	32663000	22	NaN	20.8941	20.5909	20.8355	NaN	20.969	21.1296	21.0305
[truncated: 766 more rows]

## Sheet: Tab 2 Imputed Data
Accession	ID	Gene Name	Description	Significant	.=-LOG(P-value)	Difference		Peptides	Razor + unique peptides	Unique peptides	Sequence coverage [%]	Unique + razor sequence coverage [%]	Unique sequence coverage [%]	Mol. weight [kDa]	Q-value	Score	Intensity	MS/MS count	22-KO	24-KO	36-WT	38-KO	57-KO	59-WT	63-WT	65-WT
A7L9Z8	AT2C2_MOUSE	Atp2c2	Calcium-transporting ATPase type 2C member 2	+	4.95769	-3.2679		25	25	24	31.5	31.5	29.6	102.53	0	290.97	177270000	129	18.7341	18.9538	22.5238	19.859	19.245	22.407	22.4784	22.4541
Q78ZM0	Q78ZM0_MOUSE	Snx3	Sorting nexin-3	+	2.41554	-1.12989		4	4	3	21.6	21.6	17.3	18.762	0	6.8327	14161000	20	18.5695	19.5473	19.7751	18.5581	18.6811	20.0352	19.97	20.0952
E0CZ27	E0CZ27_MOUSE	H3f3a	Histone H3 (Fragment)	+	2.01509	-2.81549		3	3	3	15.1	15.1	15.1	13.322	0	4.8376	73289000	23	18.8647	18.6411	19.349	18.464	19.054	22.3618	22.3963	22.1787
P05366	SAA1_MOUSE	Saa1	Serum amyloid A-1 protein	+	1.9352	3.2622		5	5	4	32.8	32.8	24.6	13.77	0	14.45	26827000	28	18.7342	22.2452	18.0939	22.4503	22.1553	18.1962	17.6485	18.5976
P11881	ITPR1_MOUSE	Itpr1	Inositol 1,4,5-trisphosphate receptor type 1	+	2.28381	-1.74551		22	18	12	9.2	7.9	5.9	313.16	0	42.169	26960000	56	18.9789	17.9302	19.9009	18.4234	19.1801	19.8937	21.1059	20.5941
P28230	CXB1_MOUSE	Gjb1	Gap junction beta-1 protein	+	2.9702	-1.14477		4	4	4	12.7	12.7	12.7	32.003	0	8.3717	13795000	12	19.0621	18.2155	19.8761	18.7879	18.7344	19.608	19.9175	19.9774
P35276	RAB3D_MOUSE	Rab3d	Ras-related protein Rab-3D	+	2.05237	-2.40505		5	3	2	27.4	20.5	11.9	24.416	0	29.206	32656000	16	19.6635	21.2255	21.4546	19.292	19.4831	21.9917	23.5717	22.2664
B9EHJ3	B9EHJ3_MOUSE	Tjp1	Tight junction protein ZO-1	+	2.05395	-1.29375		25	25	25	20	20	20	188.85	0	71.649	75019000	86	19.8303	20.7003	20.8347	20.1547	19.3337	21.1857	21.5757	21.5981
P49722	PSA2_MOUSE	Psma2	Proteasome subunit alpha type-2	+	2.25715	-1.55649		6	6	6	34.2	34.2	34.2	25.926	0	23.145	19911000	19	18.7993	18.9146	19.2595	18.5989	18.5768	20.625	20.9018	20.3293
P54116	STOM_MOUSE	Stom	Stomatin	+	2.42184	1.13829		9	9	9	34.2	34.2	34.2	31.375	0	115.35	77402000	107	21.8466	22.6721	21.6318	22.6532	22.5513	20.9484	21.4458	21.1441
Q06890	CLUS_MOUSE	Clu	Clusterin	+	2.16852	1.27036		21	21	21	38.8	38.8	38.8	51.655	0	118.1	794340000	342	24.1455	24.9917	23.5941	25.0904	24.8068	23.2673	24.0823	23.0093
Q3TXS7	PSMD1_MOUSE	Psmd1	26S proteasome non-ATPase regulatory subunit 1	+	2.49271	-1.76653		7	7	7	12.1	12.1	12.1	105.73	0	28.116	27340000	34	20.007	18.4063	20.6655	18.5381	18.7704	20.5263	20.7345	20.8615
Q3U1J4	DDB1_MOUSE	Ddb1	DNA damage-binding protein 1	+	2.05356	-2.79344		4	4	4	3.5	3.5	3.5	126.85	0	6.5175	16704000	11	18.9498	17.9112	21.5364	19.0288	18.7746	22.1656	19.5127	22.6235
Q61990	PCBP2_MOUSE	Pcbp2	Poly(rC)-binding protein 2	+	2.69008	2.82696		5	4	4	18	14.9	14.9	38.221	0	13.883	14962000	14	21.3095	21.5145	18.2077	21.6218	19.8012	17.8998	17.6355	19.1961
D3Z637	D3Z637_MOUSE	Tpd52	Tumor protein D52	+	2.24565	-0.923318		7	7	7	40.1	40.1	40.1	17.603	0	41.992	35915000	43	20.8995	20.9164	21.2238	20.6492	20.4758	21.4702	21.8552	22.0851
Q64435	UD16_MOUSE	Ugt1a6	UDP-glucuronosyltransferase 1-6	+	2.30691	-2.08875		3	3	3	5.5	5.5	5.5	60.438	0	4.6282	7608800	9	18.2066	18.1677	18.7045	17.9123	17.789	20.4164	20.7216	20.5881
H7BX95	H7BX95_MOUSE	Srsf1	Serine/arginine-rich splicing factor 1	+	1.95844	1.40921		8	8	8	31.6	31.6	31.6	28.329	0	11.06	7859100	16	19.3651	19.532	18.6851	19.5346	19.7941	18.8717	17.2854	17.7467
Q6TEK5	VKORL_MOUSE	Vkorc1l1	Vitamin K epoxide reductase complex subunit 1-like protein 1	+	3.45855	-2.62402		4	4	4	20.5	20.5	20.5	19.778	0	8.4011	20160000	15	18.2919	19.0313	21.7019	18.6479	19.8444	21.1572	21.6983	21.7541
H7BWY4	H7BWY4_MOUSE	Dlg1	Disks large homolog 1	+	2.78417	-2.28943		14	14	14	23.4	23.4	23.4	96.891	0	50.011	50646000	59	19.178	19.0397	21.0078	20.0834	19.3057	21.2721	22.5898	21.8947
Q8BJM5	ZNT6_MOUSE	Slc30a6	Zinc transporter 6	+	2.43027	2.57181		2	2	2	6.1	6.1	6.1	51.026	0	6.5484	7656300	9	21.4831	21.3319	19.719	21.4857	20.0514	18.5952	18.0116	17.739
D3YVC9	D3YVC9_MOUSE	Slc25a16	Graves disease carrier protein homolog (Fragment)	+	3.54742	-2.3202		6	6	6	23.9	23.9	23.9	34.912	0	31.646	14702000	20	19.0295	18.6411	20.8267	17.8166	18.3943	21.1848	20.3368	20.8139
Q8K273	MMGT1_MOUSE	Mmgt1	Membrane magnesium transporter 1	+	3.54659	-0.785335		4	4	4	35.1	35.1	35.1	14.677	0	18.655	108620000	53	23.4746	23.3676	23.9145	23.1558	23.2046	24.1895	24.2275	24.0124
Q8R404	MIC13_MOUSE	Micos13	MICOS complex subunit MIC13	+	2.71518	-1.48761		2	2	2	23.5	23.5	23.5	13.373	0	21.408	12885000	9	18.7715	18.9551	20.1375	18.208	19.4976	20.5804	20.4259	20.2388
Q921Q3	ALG1_MOUSE	Alg1	Chitobiosyldiphosphodolichol beta-mannosyltransferase	+	3.012	-2.09444		3	3	3	9.1	9.1	9.1	54.417	0	5.8204	12200000	8	18.8703	17.9085	19.7727	18.1216	18.0852	20.1513	21.0913	20.3481
Q99L47	F10A1_MOUSE	St13	Hsc70-interacting protein	+	2.58171	-1.07664		3	3	3	10.2	10.2	10.2	41.655	0	10.245	11495000	13	19.2432	19.3952	20.045	19.608	18.6806	20.4058	20.4488	20.3339
Q99L88	SNTB1_MOUSE	Sntb1	Beta-1-syntrophin	+	2.86405	-1.56932		18	18	17	49	49	47.7	58.081	0	78.674	137330000	79	21.4363	20.9545	22.135	20.4483	20.5028	22.2457	22.857	22.3815
Q99N94	RM09_MOUSE	Mrpl9	39S ribosomal protein L9, mitochondrial	+	2.2931	-1.36817		4	4	4	17	17	17	30.244	0	5.494	11709000	16	18.2638	18.9851	20.086	19.6309	18.6378	19.9686	20.483	20.4528
E0CY07	E0CY07_MOUSE	Tmem167	Protein kish	+	1.79359	-2.25993		2	2	2	19.6	19.6	19.6	6.3586	0	4.4416	13705000	6	19.8209	19.1973	19.5071	18.8757	18.6177	21.9054	21.9456	22.1933
Q9CRB6	TPPP3_MOUSE	Tppp3	Tubulin polymerization-promoting protein family member 3	+	2.06648	-1.24149		2	2	2	15.9	15.9	15.9	18.965	0	18.862	17199000	13	19.082	19.6819	19.9805	18.5329	19.5601	20.3398	20.647	20.8554
Q9CZB0	C560_MOUSE	Sdhc	Succinate dehydrogenase cytochrome b560 subunit, mitochondrial	+	1.76761	-2.42612		5	5	5	29.6	29.6	29.6	18.382	0	12.281	70245000	48	22.097	20.1489	22.2102	19.514	18.8245	23.2226	22.2468	22.6094
Q9D1E8	PLCE_MOUSE	Agpat5	1-acyl-sn-glycerol-3-phosphate acyltransferase epsilon	+	2.11231	-1.5036		3	3	3	9	9	9	42.202	0	10.633	13850000	19	18.8744	19.0661	19.6459	19.1555	19.6142	21.0141	20.9047	21.16
Q9D1H6	NDUF4_MOUSE	Ndufaf4	NADH dehydrogenase [ubiquinone] 1 alpha subcomplex assembly factor 4	+	1.84861	-1.97606		2	2	2	15	15	15	20.082	0	3.8397	9566100	7	18.7445	18.4171	21.6489	18.3798	19.5317	19.2775	20.9158	21.1352
Q9D823	RL37_MOUSE	Rpl37	60S ribosomal protein L37	+	1.86619	-3.17811		3	3	3	26.8	26.8	26.8	11.078	0	3.6914	143820000	30	17.9506	21.9087	22.453	19.0237	19.6106	22.1405	23.9087	22.7038
Q9D8B6	F210B_MOUSE	Fam210b	Protein FAM210B, mitochondrial	+	2.766	-1.98908		4	4	4	21.6	21.6	21.6	20.344	0	6.4622	24568000	25	19.6415	19.2786	21.5898	18.5104	18.7584	20.801	20.3995	21.355
Q9JJF9	SPP2A_MOUSE	Sppl2a	Signal peptide peptidase-like 2A	+	2.20724	-1.6699		2	2	2	4.6	4.6	4.6	58.128	0	3.5501	14194000	10	18.3374	18.7806	19.1242	18.5728	18.627	20.9637	20.3926	20.517
Q9R111	GUAD_MOUSE	Gda	Guanine deaminase	+	4.49234	-2.751		6	6	6	16.1	16.1	16.1	51.012	0	24.727	26151000	23	19.878	18.8272	22.3671	19.3487	19.4949	21.9246	22.323	21.938
A0A0A6YXW6	A0A0A6YXW6_MOUSE	Igha	Immunoglobulin heavy constant alpha (Fragment)	+	2.40063	-3.94533		10	10	10	47.8	47.8	47.8	41.958	0	55.833	178940000	52	19.2093	19.8005	24.7058	20.9649	19.6531	23.4931	25.3997	21.8105
A0A0N4SUJ3	A0A0N4SUJ3_MOUSE	Naaladl2	N-acetylated alpha-linked acidic dipeptidase-like 2	+	2.62445	-1.10468		19	19	19	32.2	32.2	32.2	88.516	0	64.645	121420000	81	21.3307	20.8109	21.5949	20.4755	20.8756	22.038	22.1863	22.0922
D3Z286	D3Z286_MOUSE	Tmppe	Transmembrane protein with metallophosphoesterase domain	+	2.35479	-1.6119		3	3	3	11	11	11	49.401	0	2.6922	6211200	7	18.9656	19.4765	19.9034	18.0729	18.7386	20.6765	20.8761	20.2452
A2A863	ITB4_MOUSE	Itgb4	Integrin beta-4		0.0778522	0.0358214		27	27	27	16.8	16.8	16.8	201.65	0	57.118	45658000	78	20.0007	20.424	20.4321	20.4414	20.6336	20.3942	20.4802	20.0499
A2AJ88	PLPL7_MOUSE	Pnpla7	Patatin-like phospholipase domain-containing protein 7		0.257908	-0.347173		5	5	4	5	5	4.4	150.49	0	10.972	7007000	16	19.4847	20.5437	18.6378	18.9935	19.1656	20.4483	20.4301	20.06
A2ALW5	DJC25_MOUSE	Dnajc25	DnaJ homolog subfamily C member 25		0.508352	0.499677		6	6	6	15.1	15.1	15.1	41.937	0	14.762	14785000	21	20.3398	20.1848	19.7603	19.6471	19.6429	20.0174	19.8119	18.2264
E9Q5L2	E9Q5L2_MOUSE	Itih4	Inter alpha-trypsin inhibitor, heavy chain 4		0.769006	0.499441		6	6	6	8	8	8	102.82	0	41.769	15269000	19	19.159	20.1477	18.7555	19.434	20.0502	18.9121	19.525	19.6006
A9JSM3	TM238_MOUSE	Tmem238	Transmembrane protein 238		1.09787	-1.78344		5	5	5	20.5	20.5	20.5	18.226	0	6.3977	26462000	19	18.6629	21.2667	20.912	17.8961	18.6469	22.0589	20.1655	20.47
B2RXS4	PLXB2_MOUSE	Plxnb2	Plexin-B2		0.327833	-0.23188		29	29	29	21.8	21.8	21.8	206.23	0	83.147	185620000	93	23.6416	23.25	23.331	22.3068	23.4912	23.4335	23.455	23.3975
A0A5F8MPC5	A0A5F8MPC5_MOUSE	Osbpl8	Oxysterol-binding protein (Fragment)		1.70982	-1.0164		5	5	5	8.5	8.5	8.5	79.231	0	14.925	12613000	15	19.0038	19.1887	20.5489	19.3996	20.4357	20.5314	20.4367	20.5764
F7AC58	F7AC58_MOUSE	Piezo1	Piezo-type mechanosensitive ion channel component		1.89157	-1.12297		13	13	13	6.9	6.9	6.9	292.12	0	49.88	20374000	50	19.2523	18.6862	19.4988	18.9638	18.9924	20.1327	20.906	19.849
E9PV24	FIBA_MOUSE	Fga	Fibrinogen alpha chain		0.138572	-0.109343		21	21	21	25.2	25.2	25.2	87.428	0	176.75	465130000	294	22.5994	23.2112	22.8482	23.5699	22.7225	23.6438	23.248	22.8003
E9PYK3	PARP4_MOUSE	Parp4	Protein mono-ADP-ribosyltransferase PARP4		0.505704	0.407978		3	3	3	1.7	1.7	1.7	216.13	0	17.09	4519000	14	19.3453	19.3584	19.4966	19.6335	18.769	19.3508	18.2951	18.3319
E9Q137	TX264_MOUSE	Tex264	Testis-expressed protein 264 homolog		0.557314	0.368532		7	7	7	30.4	30.4	30.4	33.589	0	39.209	19832000	49	20.3916	19.1208	19.747	20.2652	20.0354	19.7669	19.2839	19.5412
A0A140T8I9	A0A140T8I9_MOUSE	Pi4ka	Phosphatidylinositol 4-kinase alpha		0.339991	-0.273957		8	8	8	4.6	4.6	4.6	231.35	0	31.737	6087800	19	19.7746	18.4022	18.9297	18.5347	18.31	19.0791	19.0228	19.0856
E9Q4Z2	ACACB_MOUSE	Acacb	Acetyl-CoA carboxylase 2		1.96795	-0.34611		72	61	61	35.9	31.4	31.4	275.75	0	235.52	420730000	282	22.5586	22.6213	22.6674	22.4293	22.319	22.8945	22.7782	22.9724
G5E829	AT2B1_MOUSE	Atp2b1	Plasma membrane calcium-transporting ATPase 1		0.0498703	0.0247178		19	10	8	17.9	10.2	7.7	134.75	0	41.409	31373000	39	20.4344	20.2421	20.1695	19.8085	20.3188	20.4029	20.2431	19.8895
O08547	SC22B_MOUSE	Sec22b	Vesicle-trafficking protein SEC22b		1.29293	0.216674		17	17	17	64.7	64.7	64.7	24.74	0	188.86	859250000	395	24.3456	24.3558	24.4077	24.35	24.4887	24.0361	24.103	24.1267
I7HJS1	I7HJS1_MOUSE	Emd	Emerin		0.663779	-0.21029		6	6	6	33.2	33.2	33.2	25.134	0	77.497	21985000	40	20.4465	20.5889	20.9216	20.8545	20.5126	20.5726	21.1044	20.6451
D3YTY9	D3YTY9_MOUSE	Kng1	Kininogen-1		0.166735	-0.0869541		9	9	9	22.1	22.1	22.1	53.204	0	60.357	46918000	46	21.1994	21.1571	20.9355	21.2433	20.8878	20.9509	21.2215	21.7276
O08688	CAN5_MOUSE	Capn5	Calpain-5		0.652356	-0.464052		7	7	7	14.1	14.1	14.1	72.954	0	19.737	16595000	21	20.2526	20.3167	20.1129	19.2954	19.0605	19.9352	20.4346	20.2988
O08691	ARGI2_MOUSE	Arg2	Arginase-2, mitochondrial		0.0892356	-0.0736265		10	10	10	41	41	41	38.878	0	66.603	114910000	62	23.0225	21.8981	22.1714	22.227	22.5959	22.7045	22.2537	22.9084
O08692	NGP_MOUSE	Ngp	Neutrophilic granule protein		0.11492	-0.239624		5	5	5	37.1	37.1	37.1	19.331	0	14.907	8535400	31	18.2609	20.9953	18.3369	19.0149	18.4827	19.9651	20.381	19.0294
O08715	AKAP1_MOUSE	Akap1	A-kinase anchor protein 1, mitochondrial		0.451492	0.183235		10	10	10	19.7	19.7	19.7	92.194	0	30.765	34248000	47	20.6833	20.2131	20.2754	20.1766	20.4054	19.7894	20.23	20.4507
O08749	DLDH_MOUSE	Dld	Dihydrolipoyl dehydrogenase, mitochondrial		0.045351	-0.0208411		24	24	24	56.2	56.2	56.2	54.272	0	193.74	614600000	390	23.7562	23.2525	23.248	23.3081	23.7025	23.5908	23.6351	23.6288
O08795	GLU2B_MOUSE	Prkcsh	Glucosidase 2 subunit beta		0.244303	-0.0463886		16	16	16	42	42	42	58.792	0	73.464	383680000	227	22.8303	22.8878	23.0476	22.7469	22.872	22.9276	22.7163	22.8312
O08807	PRDX4_MOUSE	Prdx4	Peroxiredoxin-4		2.28618	-0.448207		20	20	19	66.8	66.8	66.8	31.052	0	129.83	1553400000	431	24.6957	24.7995	24.916	24.6567	24.6992	25.3781	25.0956	25.2542
O08912	GALT1_MOUSE	Galnt1	Polypeptide N-acetylgalactosaminyltransferase 1		1.20024	0.308558		17	17	17	35.2	35.2	35.2	64.254	0	73.904	196730000	146	22.5666	22.4879	22.1445	22.2395	22.3797	21.837	22.3963	22.0616
Q3TMX0	Q3TMX0_MOUSE	Sdcbp	Syntenin-1		1.54899	1.94737		5	5	5	22.8	22.8	22.8	32.251	0	12.158	31358000	34	20.4072	21.2866	20.1846	21.6966	21.3219	18.5129	20.3692	17.8562
O08997	ATOX1_MOUSE	Atox1	Copper transport protein ATOX1		0.561321	-1.22902		5	5	5	58.8	58.8	58.8	7.3384	0	16.873	30711000	18	20.9725	21.304	20.0639	18.0976	17.3535	20.6777	20.8118	21.0903
B0R030	B0R030_MOUSE	Snap23	Synaptosomal-associated protein (Fragment)		0.608304	0.385634		6	6	6	47.8	47.8	47.8	17.781	0	76.836	37886000	75	21.0926	21.254	20.9093	20.9614	20.1062	20.1704	20.4157	20.3763
O09061	PSB1_MOUSE	Psmb1	Proteasome subunit beta type-1		0.764696	-0.390659		6	6	6	32.1	32.1	32.1	26.372	0	23.184	34649000	25	20.2128	21.3051	21.4067	20.8786	21.1541	21.3828	21.217	21.1066
O09111	NDUBB_MOUSE	Ndufb11	NADH dehydrogenase [ubiquinone] 1 beta subcomplex subunit 11, mitochondrial		0.50644	1.11459		7	7	7	51.7	51.7	51.7	17.444	0	23.892	31465000	33	21.6423	20.8145	21.6765	21.3857	21.6845	21.644	17.4653	20.2829
O09117	SYPL1_MOUSE	Sypl1	Synaptophysin-like protein 1		0.0129837	-0.0130796		2	2	2	13	13	13	28.899	0	14.173	118240000	48	23.0229	23.0594	23.7761	22.9206	24.0739	22.8192	23.4302	23.1037
O09131	GSTO1_MOUSE	Gsto1	Glutathione S-transferase omega-1		0.114682	0.112453		9	9	9	30.4	30.4	30.4	27.497	0	13.857	31103000	28	20.5015	21.8394	21.5433	21.1111	21.1917	20.5088	21.3501	20.7917
O35083	PLCA_MOUSE	Agpat1	1-acyl-sn-glycerol-3-phosphate acyltransferase alpha		0.109022	0.0585232		5	5	5	29.5	29.5	29.5	31.709	0	31.156	213870000	85	24.0251	24.0552	24.1784	23.8118	23.6703	23.8097	23.9862	23.3541
O35114	SCRB2_MOUSE	Scarb2	Lysosome membrane protein 2		1.13438	0.281647		10	10	10	20.5	20.5	20.5	54.043	0	35.423	99892000	70	22.8282	22.8636	22.476	23.0236	22.4578	22.6529	22.5048	22.413
O35129	PHB2_MOUSE	Phb2	Prohibitin-2		0.976422	0.186671		24	24	24	84.3	84.3	84.3	33.296	0	170.63	1782400000	603	26.0774	25.7768	25.7652	25.9596	26.0357	25.8968	25.5765	25.8643
A0A1B0GT05	A0A1B0GT05_MOUSE	Gm45785	Predicted gene 45785		0.0180634	-0.00712729		4	4	4	42.6	42.6	42.6	10.446	0	10.041	36007000	32	21.2757	21.3584	21.2656	21.401	20.9654	21.4596	21.2853	21.0186
A2A9I0	A2A9I0_MOUSE	Gosr2	Golgi SNAP receptor complex member 2		0.744199	-0.325066		5	5	5	26.1	26.1	26.1	19.571	0	9.6467	71176000	37	22.5486	22.0145	22.5484	22.9171	22.4027	22.7357	22.846	23.0529
O35215	DOPD_MOUSE	Ddt	D-dopachrome decarboxylase		1.12731	-0.291507		8	8	8	79.7	79.7	79.7	13.077	0	29.997	87137000	55	22.5048	21.9623	22.5975	22.0023	22.2935	22.465	22.4795	22.387
O35326	SRSF5_MOUSE	Srsf5	Serine/arginine-rich splicing factor 5		0.486741	-0.388986		3	2	2	13.4	10	10	30.891	0	22.295	7546000	11	19.0081	18.3154	19.1988	19.8703	19.197	19.8032	19.1745	19.7704
F6UFG6	F6UFG6_MOUSE	Anp32a	Acidic leucine-rich nuclear phosphoprotein 32 family member A (Fragment)		0.194626	0.108203		7	7	5	45.7	45.7	34.1	15.306	0	16.654	24168000	30	20.6375	20.2449	20.3025	19.9136	20.1169	19.8786	20.4681	19.8309
O35435	PYRD_MOUSE	Dhodh	Dihydroorotate dehydrogenase (quinone), mitochondrial		0.591332	-0.14255		17	17	17	51.6	51.6	51.6	42.699	0	86.948	123340000	97	22.3378	21.9765	22.0616	21.9827	21.8558	22.2269	22.1625	22.272
O35459	ECH1_MOUSE	Ech1	Delta(3,5)-Delta(2,4)-dienoyl-CoA isomerase, mitochondrial		0.413899	0.569379		5	5	5	19.9	19.9	19.9	36.118	0	29.647	20516000	27	20.8901	21.4611	21.4221	21.4081	21.817	19.1131	21.6043	21.1594
O35465	FKBP8_MOUSE	Fkbp8	Peptidyl-prolyl cis-trans isomerase FKBP8		1.25436	-0.569655		8	8	8	23.1	23.1	23.1	43.528	0	49.403	34543000	34	20.6321	20.1201	20.7453	20.9169	20.8795	21.3828	21.2973	21.4017
E9Q855	E9Q855_MOUSE	Scamp3	Secretory carrier-associated membrane protein		0.238417	0.0687757		5	5	5	27	27	27	34.515	0	73.773	48378000	32	21.852	22.0782	22.099	22.0421	21.9716	21.627	22.045	21.8977
O35623	BET1_MOUSE	Bet1	BET1 homolog		1.34968	-0.306205		5	5	5	60.2	60.2	60.2	13.274	0	91.205	78827000	45	21.2869	21.2332	21.5029	21.3264	21.3866	21.9543	21.4321	21.5686
O35639	ANXA3_MOUSE	Anxa3	Annexin A3		0.235974	-0.167944		5	5	5	18.3	18.3	18.3	36.384	0	25.167	28660000	31	20.0366	21.0982	20.5783	20.8177	19.9777	20.8311	20.5453	20.6473
Q5SVG5	Q5SVG5_MOUSE	Ap1b1	AP complex subunit beta		0.33409	-0.287372		28	9	9	31	12.8	12.8	101.19	0	24.377	44617000	45	21.0708	21.3575	21.1385	19.9187	21.3731	21.1457	20.9998	21.5857
O35678	MGLL_MOUSE	Mgll	Monoglyceride lipase		0.536671	-0.824647		5	5	5	22.1	22.1	22.1	33.387	0	25.885	13351000	16	20.561	19.9654	21.3052	18.3909	18.8255	18.9419	20.0807	20.7136
O35682	MYADM_MOUSE	Myadm	Myeloid-associated differentiation marker		1.23166	-2.02436		2	2	2	10.3	10.3	10.3	35.284	0	29.343	45372000	35	22.1376	18.7854	21.9947	18.4777	19.1827	21.2044	22.0569	21.4249
O35704	SPTC1_MOUSE	Sptlc1	Serine palmitoyltransferase 1		0.19476	0.0658312		11	11	11	29	29	29	52.534	0	91.574	61298000	77	21.0304	21.0425	20.7442	21.2035	21.1596	21.1458	21.3304	20.9523
Q8C2Q7	Q8C2Q7_MOUSE	Hnrnph1	Heterogeneous nuclear ribonucleoprotein H		0.253921	-0.303689		6	4	4	18.6	12.9	12.9	51.217	0	70.784	19293000	20	20.03	18.8389	19.1024	20.5273	19.7382	20.4095	20.237	20.6002
O35855	BCAT2_MOUSE	Bcat2	Branched-chain-amino-acid aminotransferase, mitochondrial		0.0552677	-0.0234642		15	15	15	49.9	49.9	49.9	44.127	0	54.397	245150000	122	23.2438	23.0279	22.8877	23.4414	23.2186	23.3944	23.3473	23.3961
O35857	TIM44_MOUSE	Timm44	Mitochondrial import inner membrane translocase subunit TIM44		0.592928	-0.620324		8	8	8	17.5	17.5	17.5	51.091	0	16.332	10985000	14	19.0051	18.7589	18.1901	19.0852	19.0631	20.2432	20.265	19.6954
O35874	SATT_MOUSE	Slc1a4	Neutral amino acid transporter A		0.694935	-0.86045		4	4	4	12.8	12.8	12.8	56.061	0	125.47	44089000	43	20.9245	20.8692	21.4042	18.5669	20.8896	20.9974	20.848	21.4424
O35887	CALU_MOUSE	Calu	Calumenin		0.975318	-0.285281		20	20	3	55.6	55.6	7.6	37.063	0	169.18	463780000	413	23.1334	22.5782	23.3693	23.0256	22.8403	23.2777	23.0889	22.9826
O35988	SDC4_MOUSE	Sdc4	Syndecan-4		0.0862757	-0.112602		3	3	3	16.7	16.7	16.7	21.482	0	15.602	6838100	22	19.3558	19.7976	18.9922	19.449	17.8575	19.7903	18.9145	19.2133
O54724	CAVN1_MOUSE	Cavin1	Caveolae-associated protein 1		0.0256827	0.0202694		19	19	19	51.8	51.8	51.8	43.953	0	275.71	261400000	209	22.3104	22.4572	22.9307	22.1437	22.62	21.8799	22.6285	22.0111
O54734	OST48_MOUSE	Ddost	Dolichyl-diphosphooligosaccharide--protein glycosyltransferase 48 kDa subunit		0.331657	-0.0729327		20	20	20	58.3	58.3	58.3	49.027	0	211.37	2485500000	470	25.9657	25.9528	26.1896	26.2446	25.9949	26.0571	26.2413	25.9618
O55022	PGRC1_MOUSE	Pgrmc1	Membrane-associated progesterone receptor component 1		1.07236	0.383475		9	8	8	59	54.4	54.4	21.694	0	49.551	142750000	91	23.9447	24.0167	23.9222	24.2257	23.8111	23.7415	23.1534	23.6472
Q924B0	Q924B0_MOUSE	Impa1	Inositol-1-monophosphatase		1.21672	-0.723671		4	4	4	17	17	17	30.429	0	16.966	9341400	13	18.8615	20.0172	20.1354	18.642	19.2617	19.8163	19.7579	19.9676
O55026	ENTP2_MOUSE	Entpd2	Ectonucleoside triphosphate diphosphohydrolase 2		0.00558968	-0.00765133		4	4	4	9.9	9.9	9.9	54.319	0	12.588	10804000	15	19.8856	20.6016	20.6341	20.2271	18.926	19.3968	20.1074	19.5325
O55029	COPB2_MOUSE	Copb2	Coatomer subunit beta		0.262965	-0.127961		23	23	23	35.2	35.2	35.2	102.45	0	123.4	121540000	123	21.46	21.2787	21.0487	21.4211	20.9118	21.3923	21.3363	21.8061
O55100	SNG1_MOUSE	Syngr1	Synaptogyrin-1		0.450513	0.49137		2	2	2	10.3	10.3	10.3	25.652	0	10.628	33370000	27	21.6865	21.895	21.8643	21.1918	21.5843	21.5458	21.23	19.7521
O55111	DSG2_MOUSE	Dsg2	Desmoglein-2		0.80441	0.83415		5	5	5	6.2	6.2	6.2	122.38	0	17.089	4627000	12	18.3314	18.8154	17.6486	19.6398	20.2998	18.8803	18.7292	18.4916
O55126	NIPS2_MOUSE	Nipsnap2	Protein NipSnap homolog 2		1.02529	0.295208		6	6	6	22.1	22.1	22.1	32.932	0	12.376	48872000	51	21.057	21.1701	20.6819	21.2533	21.3487	21.2031	21.0813	20.6819
O55131	SEPT7_MOUSE	Septin7	Septin-7		0.0316037	-0.0122309		5	5	5	13.5	13.5	13.5	50.549	0	9.3555	8073800	22	18.7523	18.6686	18.9036	18.8655	19.1922	18.7331	18.8361	19.0549
O55137	ACOT1_MOUSE	Acot1	Acyl-coenzyme A thioesterase 1		1.7329	-0.600884		7	7	2	15.5	15.5	3.1	46.135	0	13.527	39105000	24	20.5652	19.9194	20.5715	20.1893	19.8971	21.0476	20.6916	20.6639
O55142	RL35A_MOUSE	Rpl35a	60S ribosomal protein L35a		0.577817	-0.177181		16	16	16	67.3	67.3	67.3	12.554	0	31.35	1999300000	516	25.2216	25.3074	25.1957	25.4758	25.4096	25.7098	25.7738	25.4438
O55143	AT2A2_MOUSE	Atp2a2	Sarcoplasmic/endoplasmic reticulum calcium ATPase 2		2.35212	0.539038		53	53	33	51.2	51.2	35.4	114.86	0	323.31	1552000000	866	24.3039	24.5847	24.1181	24.6932	24.764	23.9866	24.1951	23.8899
O55234	PSB5_MOUSE	Psmb5	Proteasome subunit beta type-5		0.197514	-0.177858		9	9	9	35.6	35.6	35.6	28.532	0	43.118	58683000	43	20.8637	21.1325	20.3944	20.7209	21.3961	21.7685	21.6785	20.9833
O55242	SGMR1_MOUSE	Sigmar1	Sigma non-opioid intracellular receptor 1		0.908278	-1.37031		4	4	4	17.9	17.9	17.9	25.25	0	5.4346	50877000	29	18.831	19.2331	21.9243	21.6534	21.6193	21.8264	21.6766	21.3908
O70152	DPM1_MOUSE	Dpm1	Dolichol-phosphate mannosyltransferase subunit 1		0.0844149	0.0348644		12	12	12	56.2	56.2	56.2	29.174	0	47.942	245960000	118	23.8456	23.6674	24.1345	23.9506	23.7615	23.731	23.7497	23.4705
O70251	EF1B_MOUSE	Eef1b	Elongation factor 1-beta		0.284408	-0.078434		10	8	8	62.7	57.3	57.3	24.693	0	158.51	164980000	73	22.8932	22.7016	22.6593	22.4111	22.5423	22.6517	22.6932	22.8578
O70252	HMOX2_MOUSE	Hmox2	Heme oxygenase 2		1.50249	-1.20351		12	12	12	46.7	46.7	46.7	35.738	0	45.273	52989000	45	20.6095	20.28	20.9991	20.8843	19.8616	21.749	21.0966	22.6046
O70302	CIDEA_MOUSE	Cidea	Cell death activator CIDE-A		0.673985	-1.17994		3	3	3	14.7	14.7	14.7	24.669	0	3.8371	17423000	14	20.7336	19.0527	19.37	20.7762	17.9044	21.3113	21.2646	21.2406
S4R1E5	S4R1E5_MOUSE	Gpx4	Glutathione peroxidase		1.23749	0.407867		9	9	9	57.3	57.3	57.3	17.937	0	18.105	60400000	53	22.2939	23.0102	22.5203	22.752	22.776	22.0994	22.3471	22.2338
O70378	EMC8_MOUSE	Emc8	ER membrane protein complex subunit 8		1.53157	0.333784		11	11	11	58	58	58	23.348	0	114.16	123130000	108	22.0688	21.8005	21.4695	21.8688	21.6102	21.4028	21.7074	21.4336
O70400	PDLI1_MOUSE	Pdlim1	PDZ and LIM domain protein 1		0.826186	2.06981		7	7	7	35.5	35.5	35.5	35.774	0	12.053	43458000	26	18.7689	22.4975	21.8847	22.2142	21.9235	17.7324	18.7073	18.8005
O70404	VAMP8_MOUSE	Vamp8	Vesicle-associated membrane protein 8		0.57687	0.158092		8	8	8	54.5	54.5	54.5	11.451	0	48.268	138340000	92	22.1869	22.2955	22.1675	21.9959	21.9597	21.6931	22.0364	21.9086
O70423	AOC3_MOUSE	Aoc3	Membrane primary amine oxidase		0.185381	0.165955		27	27	27	45.9	45.9	45.9	84.533	0	155.7	861990000	392	24.9542	24.8061	25.7196	24.9518	25.3753	24.165	24.9345	24.6044
O70435	PSA3_MOUSE	Psma3	Proteasome subunit alpha type-3		0.586854	-0.931533		5	5	5	21.2	21.2	21.2	28.405	0	15.891	30681000	23	19.4782	19.4142	18.0001	18.7027	19.3618	20.8639	20.8006	21.0183
Q8BH40	Q8BH40_MOUSE	Stx7	Syntaxin-7		0.254442	0.0753622		10	10	10	47.9	47.9	47.9	29.736	0	58.098	106700000	81	21.7395	21.818	21.6975	21.6695	21.3612	21.4819	21.6791	21.4283
O70480	VAMP4_MOUSE	Vamp4	Vesicle-associated membrane protein 4		0.295956	0.155677		4	4	4	26.2	26.2	26.2	16.353	0	24.218	10355000	15	19.384	19.8813	19.3993	18.9544	19.1688	19.1502	18.9506	19.2657
O70503	DHB12_MOUSE	Hsd17b12	Very-long-chain 3-oxoacyl-CoA reductase		0.225701	-0.116174		23	23	23	64.1	64.1	64.1	34.741	0	162.7	2355900000	864	25.6031	25.8516	25.4126	25.7376	26.0823	26.2293	26.0012	26.0962
O70570	PIGR_MOUSE	Pigr	Polymeric immunoglobulin receptor		0.345531	-0.156427		23	23	23	31.9	31.9	31.9	84.998	0	178.09	194660000	186	22.114	21.7244	22.0825	21.5593	21.5306	21.567	21.7435	22.1609
O70572	NSMA_MOUSE	Smpd2	Sphingomyelin phosphodiesterase 2		0.962316	0.318837		5	5	5	15.3	15.3	15.3	47.466	0	7.8007	21418000	22	20.8361	21.2524	20.9515	20.8128	20.9639	20.5419	20.771	20.3254
G3UY34	G3UY34_MOUSE	Dtnb	Dystrobrevin		0.0155261	-0.0187545		4	4	4	6.7	6.7	6.7	67.762	0	8.2236	4613300	8	19.5509	17.759	18.3114	18.8477	18.6806	18.7541	19.1701	18.6776
O88342	WDR1_MOUSE	Wdr1	WD repeat-containing protein 1		1.14356	-0.498828		21	21	21	42.9	42.9	42.9	66.406	0	62.032	139730000	98	21.9496	21.9365	21.9509	21.8134	21.1145	22.0932	22.4637	22.3015
Q91XH6	Q91XH6_MOUSE	Vti1b	Vesicle transport through interaction with t-SNAREs 1B homolog		0.573534	-0.319123		7	7	7	38.8	38.8	38.8	26.727	0	24.603	57639000	45	21.8861	21.8043	21.3948	21.1827	21.4009	22.2206	21.7265	22.2086
O88441	MTX2_MOUSE	Mtx2	Metaxin-2		0.633262	-0.337118		11	11	11	45.6	45.6	45.6	29.758	0	39.217	71406000	75	21.9524	21.601	22.2979	21.6706	20.9506	21.7728	21.7606	21.6917
O88455	DHCR7_MOUSE	Dhcr7	7-dehydrocholesterol reductase		1.35494	0.430323		6	6	6	16.3	16.3	16.3	53.918	0	17.044	151730000	49	23.1159	22.8407	22.8846	22.9492	23.1214	22.2774	22.8005	22.3435
A2BFF8	A2BFF8_MOUSE	Dync1i2	Cytoplasmic dynein 1 intermediate chain 2		0.418877	0.164528		5	5	5	11.3	11.3	11.3	68.265	0	28.697	11170000	39	19.3871	19.6861	19.4512	19.3589	19.4811	19.5238	19.4356	18.8445
O88561	S27A3_MOUSE	Slc27a3	Solute carrier family 27 member 3		0.0396493	0.025106		17	17	17	25.9	25.9	25.9	72.964	0	113.38	272220000	141	22.6957	22.5333	21.9675	22.3663	22.6708	22.7425	22.9165	22.5392
O88569	ROA2_MOUSE	Hnrnpa2b1	Heterogeneous nuclear ribonucleoproteins A2/B1		0.519142	-0.749829		6	6	6	22.7	22.7	22.7	37.402	0	19.67	21390000	49	19.9908	20.4243	20.116	19.726	17.4882	20.1722	19.9003	20.44
O88587	COMT_MOUSE	Comt	Catechol O-methyltransferase		0.0150769	-0.00917959		7	7	7	37.4	37.4	37.4	29.486	0	34.841	64071000	44	21.485	22.0487	22.189	21.8568	22.2757	21.7311	21.7142	22.0686
O88630	GOSR1_MOUSE	Gosr1	Golgi SNAP receptor complex member 1		0.76584	-0.207029		5	5	5	22.8	22.8	22.8	28.489	0	18.233	71424000	52	21.7569	22.0796	21.9541	21.8222	22.1864	22.109	22.3241	22.286
O88653	LTOR3_MOUSE	Lamtor3	Ragulator complex protein LAMTOR3		0.985004	-2.26973		3	3	3	50	50	50	13.553	0	25.729	72160000	25	22.9706	22.7436	22.7478	18.145	19.898	23.0812	23.7521	23.2549
O88685	PRS6A_MOUSE	Psmc3	26S proteasome regulatory subunit 6A		1.17547	-1.56421		7	7	7	22.2	22.2	22.2	49.548	0	30.564	13703000	16	19.1645	19.931	18.8381	18.8484	18.856	21.1684	21.7075	21.3427
O88736	DHB7_MOUSE	Hsd17b7	3-keto-steroid reductase/17-beta-hydroxysteroid dehydrogenase 7		0.21213	-0.353951		5	5	5	22.8	22.8	22.8	37.316	0	115.27	11096000	13	19.8609	19.0185	20.8355	20.498	19.0675	18.6043	19.4762	20.9448
O88792	JAM1_MOUSE	F11r	Junctional adhesion molecule A		0.202202	-0.328641		5	5	5	17.7	17.7	17.7	32.423	0	16.342	32901000	42	18.8609	21.2016	21.3551	21.4685	21.4362	20.7185	21.0752	21.133
O88952	LIN7C_MOUSE	Lin7c	Protein lin-7 homolog C		0.328827	-0.15725		6	6	5	38.1	38.1	33	21.834	0	13.569	36208000	25	20.5281	20.6196	20.7112	20.895	21.1378	20.9522	21.3732	20.7731
O88967	YMEL1_MOUSE	Yme1l1	ATP-dependent zinc metalloprotease YME1L1		1.33667	0.542321		12	12	12	23.4	23.4	23.4	80.027	0	47.274	35136000	44	20.7379	20.6143	20.2412	20.3111	20.5219	19.436	20.2928	20.0459
O88968	TCO2_MOUSE	Tcn2	Transcobalamin-2		1.95185	-0.796328		2	2	2	4.2	4.2	4.2	47.585	0	3.6346	4899100	10	18.1328	19.0592	19.3621	18.9111	18.6958	19.6344	19.3357	19.652
O89023	TPP1_MOUSE	Tpp1	Tripeptidyl-peptidase 1		1.63274	-2.15589		3	3	3	8.7	8.7	8.7	61.341	0	11.926	19494000	18	18.711	19.5176	21.6641	18.7377	21.7293	21.9226	21.7958	21.9367
O89051	ITM2B_MOUSE	Itm2b	Integral membrane protein 2B		0.0546812	-0.0302901		5	5	5	18.4	18.4	18.4	30.26	0	33.045	35840000	28	22.2771	22.0131	22.5384	22.2913	22.6356	22.4787	21.8976	22.4236
D3Z315	D3Z315_MOUSE	Cope	Coatomer subunit epsilon (Fragment)		0.531546	0.272176		7	7	7	44.5	44.5	44.5	25.37	0	111.17	35061000	38	20.8824	20.3002	20.7467	21.1355	20.5602	20.5485	20.0328	20.4616
P00405	COX2_MOUSE	Mtco2	Cytochrome c oxidase subunit 2		0.847021	0.657956		7	7	7	44.9	44.9	44.9	25.976	0	62.856	2078300000	249	27.1416	27.4494	27.9061	28.1033	27.7819	26.4298	26.9007	26.6078
P00920	CAH2_MOUSE	Ca2	Carbonic anhydrase 2		0.970552	-1.10766		10	10	10	55.8	55.8	55.8	29.032	0	29.131	45952000	47	21.3312	20.0378	21.1367	18.8615	19.5014	20.371	21.6278	21.027
P01027	CO3_MOUSE	C3	Complement C3		0.855703	-0.179195		40	40	37	28.6	28.6	26.7	186.48	0	120.66	139530000	210	21.4587	21.3711	21.4823	21.5898	21.5552	21.8924	21.562	21.755
P01029	CO4B_MOUSE	C4b	Complement C4-B		0.741956	1.17133		14	14	14	10	10	10	192.91	0	66.834	23930000	38	21.05	21.0667	19.5858	19.059	22.5029	20.6031	19.0919	19.7125
A0A1L1SUX8	A0A1L1SUX8_MOUSE	Thy1	Thy-1 antigen (Fragment)		0.181847	0.108074		5	5	5	42.4	42.4	42.4	14.038	0	42.353	59778000	49	21.7647	22.1914	21.4863	22.01	22.2308	21.9232	22.4872	21.868
P01837	IGKC_MOUSE	Igkc	Immunoglobulin kappa constant		0.649386	-0.393839		6	6	6	81.3	81.3	81.3	11.934	0	58.831	111610000	63	22.4308	22.3622	22.4084	22.304	21.4703	22.7031	22.9394	22.0917
P01872	IGHM_MOUSE	Ighm	Immunoglobulin heavy constant mu		0.814511	0.862772		13	13	13	34.6	34.6	34.6	49.971	0	60.905	113870000	69	23.0251	22.6212	21.0151	23.0651	21.2942	22.5219	21.312	21.7056
P01887	B2MG_MOUSE	B2m	Beta-2-microglobulin		0.118968	-0.0727358		4	4	4	47.1	47.1	47.1	13.779	0	8.8967	91929000	45	22.9632	22.5086	22.4697	22.9927	22.2866	22.602	22.8263	23.1441
P01899	HA11_MOUSE	H2-D1	H-2 class I histocompatibility antigen, D-B alpha chain		0.521244	0.193359		17	17	10	45	45	28.2	40.836	0	53.128	229840000	156	22.7328	22.7365	22.869	23.1396	22.8717	22.2698	22.8726	22.6958
Q3TH01	Q3TH01_MOUSE	H2-K1	H-2 class I histocompatibility antigen, K-K alpha chain		0.0784812	-0.0226493		16	13	10	52.8	46.4	36.4	40.285	0	93.443	179350000	118	23.6802	23.4619	23.7089	23.6758	23.7659	23.6201	23.8667	23.4788
P02469	LAMB1_MOUSE	Lamb1	Laminin subunit beta-1		1.11684	-1.21934		21	21	21	14.9	14.9	14.9	197.09	0	57.828	46610000	58	20.3023	18.9361	19.6646	18.1726	19.2935	20.9159	19.8961	21.1052
A0A0G2JDP4	A0A0G2JDP4_MOUSE	Csn1s2b	Alpha-S2-casein-like B		1.4464	0.589746		11	11	11	67.4	67.4	67.4	15.593	0	140.66	2027400000	2140	26.8105	27.0378	26.4336	27.4293	26.6098	26.3185	26.7019	26.0745
P02798	MT2_MOUSE	Mt2	Metallothionein-2		0.733226	0.913934		3	3	1	34.4	34.4	13.1	6.1153	0	10.835	22426000	79	19.9944	21.1158	18.1923	19.8074	21.1788	20.0249	20.4351	19.7884
P02802	MT1_MOUSE	Mt1	Metallothionein-1		0.58607	-0.395048		3	3	2	34.4	34.4	21.3	6.0181	0	13.733	65028000	142	21.2275	20.745	20.9478	21.5106	21.5184	22.0699	21.5501	22.0139
P03888	NU1M_MOUSE	Mtnd1	NADH-ubiquinone oxidoreductase chain 1		0.358061	-0.728266		2	2	2	8.8	8.8	8.8	36.059	0	6.1111	31779000	18	22.9512	22.235	22.5758	22.4162	19.0905	22.3623	22.2057	22.4621
P03911	NU4M_MOUSE	Mtnd4	NADH-ubiquinone oxidoreductase chain 4		0.229506	0.292927		5	5	5	13.3	13.3	13.3	51.881	0	7.3448	39598000	87	20.9768	22.1546	22.09	22.7316	21.2206	21.781	20.6443	21.3966
P03921	NU5M_MOUSE	Mtnd5	NADH-ubiquinone oxidoreductase chain 5		0.00795581	-0.00547886		3	3	3	7.7	7.7	7.7	68.474	0	7.1446	288650000	26	26.0744	25.6102	25.9352	26.0522	25.7989	25.6507	25.5299	26.442
P03930	ATP8_MOUSE	Mtatp8	ATP synthase protein 8		0.277149	-2.04053		3	3	3	46.3	46.3	46.3	7.7662	0	6.9195	816530000	80	18.8163	26.5373	18.5744	26.5396	18.4338	26.4439	26.5748	26.8961
P03953	CFAD_MOUSE	Cfd	Complement factor D		1.39525	-1.54104		2	2	2	11.6	11.6	11.6	28.057	0	3.7359	10392000	7	18.467	18.2639	18.5906	19.3174	18.5222	21.0417	20.5148	20.5876
P04117	FABP4_MOUSE	Fabp4	Fatty acid-binding protein, adipocyte		0.0344195	-0.0143266		16	16	16	85.6	85.6	85.6	14.65	0	137.32	1030800000	352	24.3274	24.2878	24.5299	24.2413	24.1187	24.3354	23.8807	24.2864
A0A498WGS3	A0A498WGS3_MOUSE	Mbp	Myelin basic protein		1.13021	-1.163		4	4	4	30.7	30.7	30.7	16.537	0	11.922	15631000	21	19.5113	18.8494	20.8245	18.9289	20.5345	20.8531	21.2576	19.5408
P04919	B3AT_MOUSE	Slc4a1	Band 3 anion transport protein		0.979972	-0.848196		9	9	9	10.7	10.7	10.7	103.13	0	28.042	42052000	35	20.8801	21.1765	20.9159	20.4739	19.4374	21.2435	21.2068	21.9943
P05063	ALDOC_MOUSE	Aldoc	Fructose-bisphosphate aldolase C		0.41972	-0.141519		29	29	23	78.8	78.8	65	39.394	0	209.98	579070000	320	23.2594	23.3258	23.1166	22.9947	22.951	23.1354	23.2291	23.6158
P05064	ALDOA_MOUSE	Aldoa	Fructose-bisphosphate aldolase A		1.00821	0.241072		26	20	20	78.3	64.6	64.6	39.355	0	123.15	334110000	282	22.7528	23.0581	22.883	23.0409	22.8908	22.4122	22.7638	22.7192
P05201	AATC_MOUSE	Got1	Aspartate aminotransferase, cytoplasmic		0.652648	-0.326139		17	17	17	50.4	50.4	50.4	46.247	0	65.216	125040000	94	22.3394	21.7411	22.1444	21.6333	22.1894	22.4181	21.9354	22.7099
P05202	AATM_MOUSE	Got2	Aspartate aminotransferase, mitochondrial		0.0822914	0.0344615		23	23	23	57.9	57.9	57.9	47.411	0	157.96	649240000	297	24.6514	24.6232	24.486	24.3048	25.0092	24.6352	24.7088	24.6206
P05213	TBA1B_MOUSE	Tuba1b	Tubulin alpha-1B chain		0.00312039	0.000924587		29	6	0	68.5	17.5	0	50.151	0	107.41	339820000	110	23.5956	23.5516	23.5075	23.4648	23.8278	23.6176	23.5322	23.7788
P06151	LDHA_MOUSE	Ldha	L-lactate dehydrogenase A chain		0.733907	-0.224031		24	24	23	59.3	59.3	59.3	36.498	0	140.82	1426100000	397	25.6826	25.333	25.3995	25.2331	25.5161	25.5854	25.917	25.759
P06728	APOA4_MOUSE	Apoa4	Apolipoprotein A-IV		0.717331	-0.208281		18	18	18	59.2	59.2	59.2	45.029	0	130.2	176270000	115	21.9725	21.5839	22.1129	22.1985	21.7776	22.0729	21.9641	22.2158
P06745	G6PI_MOUSE	Gpi	Glucose-6-phosphate isomerase		1.11182	-0.577346		12	12	12	27.8	27.8	27.8	62.766	0	104.46	83753000	92	21.882	21.8748	21.6994	21.1209	21.0315	22.0497	22.0871	22.3825
P06796	CASK_MOUSE	Csn3	Kappa-casein		1.53748	0.844739		4	4	4	27.6	27.6	27.6	20.03	0	15.86	2879800000	175	27.5165	28.4594	27.5831	28.5042	27.6393	27.03	27.1454	26.9819
P06797	CATL1_MOUSE	Ctsl	Procathepsin L		0.370734	0.810218		6	6	6	23.1	23.1	23.1	37.547	0	32.335	25847000	25	19.7359	20.9374	19.4907	22.7594	18.5194	20.2991	18.9696	19.9518
P06801	MAOX_MOUSE	Me1	NADP-dependent malic enzyme		1.37153	-0.405681		37	37	37	68.7	68.7	68.7	63.953	0	323.31	1567800000	712	25.0698	24.8883	25.0098	24.4698	24.6221	25.1306	25.1276	25.4047
P07309	TTHY_MOUSE	Ttr	Transthyretin		1.02655	-1.57441		9	9	9	51	51	51	15.776	0	39.392	121900000	55	21.452	18.9031	22.691	22.1692	21.8058	23.275	21.9152	22.7467
P07310	KCRM_MOUSE	Ckm	Creatine kinase M-type		1.69152	2.36012		9	9	9	32.3	32.3	32.3	43.044	0	78.927	31178000	29	21.1861	22.0247	19.3302	21.291	21.0725	18.1862	20.9387	17.6786
P07356	ANXA2_MOUSE	Anxa2	Annexin A2		0.429117	-0.164217		36	36	36	80.8	80.8	80.8	38.676	0	323.31	1918400000	684	25.2203	25.4034	25.8147	25.2156	25.6946	25.2488	25.6963	25.431
P07724	ALBU_MOUSE	Alb	Albumin		1.5812	0.110814		62	62	58	86.5	86.5	84.4	68.692	0	323.31	12476000000	4110	26.857	26.8507	26.7012	26.8729	26.8112	26.8433	26.6967	26.7073
P07901	HS90A_MOUSE	Hsp90aa1	Heat shock protein HSP 90-alpha		0.556085	-0.100592		29	14	14	39	23.2	23.2	84.787	0	75.667	125920000	113	21.8374	21.9985	21.9385	22.0681	22.0036	21.99	22.1473	22.2341
P08003	PDIA4_MOUSE	Pdia4	Protein disulfide-isomerase A4		0.814525	-0.115493		44	44	44	57.2	57.2	57.2	71.982	0	323.31	1126100000	702	23.9145	24.1158	24.1799	24.1249	24.2002	24.3063	24.1423	24.189
P08071	TRFL_MOUSE	Ltf	Lactotransferrin		0.957631	0.716323		51	51	51	70.9	70.9	70.9	77.837	0	323.31	1239400000	824	24.1219	25.3041	24.5693	25.4871	25.1053	23.9705	24.7878	23.8255
P08074	CBR2_MOUSE	Cbr2	Carbonyl reductase [NADPH] 2		0.0952879	-0.0541062		3	3	3	11.5	11.5	11.5	25.958	0	7.8856	16941000	23	20.5947	20.9888	20.3932	20.1094	20.2697	20.6486	20.4492	20.688
P08113	ENPL_MOUSE	Hsp90b1	Endoplasmin		0.814489	0.0743418		69	69	67	64.2	64.2	62.7	92.475	0	323.31	8328800000	2189	27.2255	27.0748	27.1157	27.1298	27.1946	27.0393	27.1504	27.022
P08207	S10AA_MOUSE	S100a10	Protein S100-A10		0.0062794	-0.0053978		4	4	4	49.5	49.5	49.5	11.186	0	20.65	160830000	107	23.2788	22.5939	23.1118	22.7473	23.6249	22.7759	23.5019	22.8768
P08226	APOE_MOUSE	Apoe	Apolipoprotein E		0.910925	0.638078		12	12	12	33.8	33.8	33.8	35.866	0	35.526	65200000	115	21.6076	22.7379	22.1335	22.2647	22.9768	22.0301	21.4285	21.4427
P08228	SODC_MOUSE	Sod1	Superoxide dismutase [Cu-Zn]		0.70234	-0.287171		10	10	10	61	61	61	15.942	0	59.803	449600000	156	23.8592	23.9972	24.1243	23.6842	23.1316	23.9236	23.8581	23.9148
P08249	MDHM_MOUSE	Mdh2	Malate dehydrogenase, mitochondrial		0.563645	0.20971		20	20	20	63.6	63.6	63.6	35.611	0	190.42	2077600000	636	26.4008	26.1476	26.0755	25.933	26.7327	26.0505	26.0839	26.1653
P08752	GNAI2_MOUSE	Gnai2	Guanine nucleotide-binding protein G(i) subunit alpha-2		1.07153	0.213029		24	24	12	63.7	63.7	36.1	40.489	0	112.76	322160000	192	23.8598	23.7927	23.852	23.7995	23.8788	23.4991	23.7184	23.4092
P09055	ITB1_MOUSE	Itgb1	Integrin beta-1		1.01302	0.203108		25	25	25	35.6	35.6	35.6	88.231	0	130.73	304050000	308	23.6859	23.8191	23.8483	23.8033	23.8168	23.4228	23.599	23.4425
P09103	PDIA1_MOUSE	P4hb	Protein disulfide-isomerase		1.56162	-0.361574		68	68	68	91.9	91.9	91.9	57.058	0	323.31	17792000000	3509	27.0145	27.0366	27.0994	26.8368	27.1425	27.5805	27.4971	27.2996
P09242	PPBT_MOUSE	Alpl	Alkaline phosphatase, tissue-nonspecific isozyme		0.419537	-0.801989		8	8	8	17	17	17	57.514	0	27.516	40287000	28	19.083	19.2077	18.9364	20.7152	21.285	21.5538	21.4962	21.5125
P09405	NUCL_MOUSE	Ncl	Nucleolin		0.326893	-0.284033		11	11	11	17.5	17.5	17.5	76.722	0	48.629	15049000	29	19.6927	18.2539	19.3575	19.1303	19.8155	19.7608	19.342	19.5682
P09411	PGK1_MOUSE	Pgk1	Phosphoglycerate kinase 1		0.109911	-0.040235		19	19	19	57.6	57.6	57.6	44.55	0	210.98	470960000	228	23.3647	23.5369	23.4886	23.0951	23.7182	23.3958	23.5273	23.464
P09470	ACE_MOUSE	Ace	Angiotensin-converting enzyme		1.35975	0.84132		19	19	19	19.2	19.2	19.2	150.92	0	88.005	91657000	84	21.9306	22.6349	21.598	22.5296	22.5654	21.0987	22.375	21.2236
P09528	FRIH_MOUSE	Fth1	Ferritin heavy chain		0.565327	0.530201		10	10	10	56.6	56.6	56.6	21.066	0	25.075	109250000	81	21.0839	22.366	22.032	22.6087	23.0757	21.6244	21.5723	21.7847
P09671	SODM_MOUSE	Sod2	Superoxide dismutase [Mn], mitochondrial		0.0055342	0.00345564		9	9	9	38.3	38.3	38.3	24.603	0	40.48	240960000	110	23.4095	22.9991	22.8142	23.1582	23.5759	23.3281	23.5813	23.4052
A0A0R4IZW5	A0A0R4IZW5_MOUSE	Cdh1	Cadherin-1		0.0468188	0.012877		18	18	18	28.6	28.6	28.6	98.283	0	72.965	90973000	72	22.3769	22.2865	22.4116	22.5105	22.4555	22.3626	22.603	22.2007
P09813	APOA2_MOUSE	Apoa2	Apolipoprotein A-II		1.02386	-1.996		2	2	2	18.6	18.6	18.6	11.309	0	7.2957	39887000	19	21.4312	18.8206	19.2358	18.5863	18.1054	21.6926	22.2147	21.7846
A0A0A6YVR9	A0A0A6YVR9_MOUSE	Surf1	SURF1-like protein (Fragment)		0.412105	-0.549787		6	6	6	42.5	42.5	42.5	27.146	0	20.689	30431000	20	19.3612	21.3991	21.1179	21.9545	21.3728	21.7793	21.7121	21.6774
P0DN34	NDUB1_MOUSE	Ndufb1	NADH dehydrogenase [ubiquinone] 1 beta subcomplex subunit 1		0.725454	-0.498106		2	2	2	31.6	31.6	31.6	6.954	0	4.2064	78505000	27	22.6052	21.6346	22.1599	22.6095	21.5594	22.7366	22.937	22.5676
P0DP28	CALM3_MOUSE	Calm3	Calmodulin-3		0.689154	-0.149241		12	12	12	41.6	41.6	41.6	16.837	0	89.516	396240000	164	23.4605	23.4404	23.6663	23.5087	23.2551	23.316	23.5637	23.7155
P10107	ANXA1_MOUSE	Anxa1	Annexin A1		0.49993	0.257578		29	29	29	72.5	72.5	72.5	38.734	0	237.51	292120000	238	21.8948	22.8541	22.2107	22.575	22.3113	22.1154	22.4237	21.8551
P10126	EF1A1_MOUSE	Eef1a1	Elongation factor 1-alpha 1		0.786015	-0.14203		25	25	25	68.8	68.8	68.8	50.113	0	123.72	2657400000	927	26.5208	26.3505	26.3305	26.3647	26.4204	26.6302	26.7038	26.5599
P10404	ENV1_MOUSE	1 SV=3	MLV-related proviral Env polyprotein		1.61796	0.680456		18	18	16	28.2	28.2	27	69.612	0	89.62	542400000	175	24.6687	24.2868	23.609	24.4618	24.7598	23.9775	24.3792	23.4896
P10598	CASB_MOUSE	Csn2	Beta-casein		1.09171	0.663309		6	6	1	29	29	11.3	25.337	0	106.74	2924000000	820	27.2477	28.2622	26.9058	27.929	27.1265	27.2886	27.1622	26.5557
P10605	CATB_MOUSE	Ctsb	Cathepsin B		0.0795506	0.0325632		19	19	19	52.8	52.8	52.8	37.279	0	178.46	513450000	288	24.4673	24.151	24.6821	24.3247	24.6192	24.2739	24.2526	24.2235
P10639	THIO_MOUSE	Txn	Thioredoxin		2.00637	-0.648983		10	10	10	65.7	65.7	65.7	11.675	0	82.346	160290000	122	22.41	21.7717	22.4869	21.8014	21.9545	22.5498	22.9059	22.5909
A2AE89	A2AE89_MOUSE	Gstm1	Glutathione transferase		1.40726	-1.93977		5	5	5	22.5	22.5	22.5	28.556	0	12.319	38711000	30	21.9516	19.5079	22.0024	19.9198	18.4407	21.7238	22.0076	21.8453
P10810	CD14_MOUSE	Cd14	Monocyte differentiation antigen CD14		1.35112	1.08142		12	12	12	34.7	34.7	34.7	39.203	0	171.38	196050000	127	23.0295	24.0343	23.143	24.3756	23.9409	22.279	23.4539	22.1788
P10833	RRAS_MOUSE	Rras	Ras-related protein R-Ras		0.379804	0.244876		10	10	8	53.7	53.7	41.3	23.764	0	31.8	63268000	73	21.7086	21.4073	22.2258	21.8662	21.8586	21.153	21.1122	21.3701
P10852	4F2_MOUSE	Slc3a2	4F2 cell-surface antigen heavy chain		1.26298	-0.2838		33	33	33	54	54	54	58.336	0	178.18	1616900000	661	25.0426	24.932	25.0587	24.8512	24.5327	25.0393	25.2417	25.154
Q8CGP2	H2B1P_MOUSE	Hist1h2bp	Histone H2B type 1-P		0.619074	-0.575448		9	9	9	55.6	55.6	55.6	13.992	0	35.09	198190000	126	22.0462	22.8218	21.9111	22.1277	22.8399	23.6668	23.3127	23.2468
P11087	CO1A1_MOUSE	Col1a1	Collagen alpha-1(I) chain		1.21515	0.714294		6	6	6	4.5	4.5	4.5	138.03	0	17.155	98666000	60	22.7614	23.2475	21.9346	22.7585	22.6166	21.6452	22.9304	22.0166
P11152	LIPL_MOUSE	Lpl	Lipoprotein lipase		0.338923	-0.337083		12	12	12	32.5	32.5	32.5	53.109	0	31.324	57938000	67	21.4056	21.7567	21.4593	20.7937	19.9611	21.5477	21.4203	20.838
P11247	PERM_MOUSE	Mpo	Myeloperoxidase		0.0729224	0.17556		7	7	7	11.1	11.1	11.1	81.181	0	20.356	17989000	29	18.9571	21.5763	19.3748	20.1989	19.2079	21.1233	20.4622	18.2776
B7ZNJ1	B7ZNJ1_MOUSE	Fn1	Fibronectin		0.611967	0.261667		33	33	33	21	21	21	239.72	0	137.67	100420000	105	21.7055	22.232	21.7455	22.1863	21.9288	22.152	21.7485	21.36
P11352	GPX1_MOUSE	Gpx1	Glutathione peroxidase 1		0.788547	-0.339284		11	11	11	70.1	70.1	70.1	22.329	0	38.396	103450000	49	22.842	22.3211	22.4982	22.2123	22.6844	22.8177	23.2451	22.856
P11404	FABPH_MOUSE	Fabp3	Fatty acid-binding protein, heart		0.4055	-0.162198		15	15	15	78.9	78.9	78.9	14.819	0	73.958	6834700000	942	27.9538	27.7213	27.6808	27.3867	27.8755	28.2053	27.7127	27.9874
P11499	HS90B_MOUSE	Hsp90ab1	Heat shock protein HSP 90-beta		0.417526	-0.063767		42	40	25	50.3	50.3	38.5	83.28	0	228.51	999060000	436	23.8411	23.8175	23.9152	23.9565	23.6886	23.9652	23.7789	23.8995
P11672	NGAL_MOUSE	Lcn2	Neutrophil gelatinase-associated lipocalin		1.06131	2.07567		5	5	5	22	22	22	22.875	0	14.942	35121000	42	22.4168	21.9702	22.1349	23.5458	22.1153	17.7126	20.9042	20.9938
Q542I8	Q542I8_MOUSE	Itgb2	Integrin beta		0.201865	-0.381016		12	12	12	20.6	20.6	20.6	84.893	0	96.855	33836000	41	19.6139	21.0627	19.7505	20.1912	18.5813	20.9447	21.2985	18.9795
P11983	TCPA_MOUSE	Tcp1	T-complex protein 1 subunit alpha		0.893033	-0.207005		23	23	23	42.1	42.1	42.1	60.448	0	58.874	110790000	120	21.7903	21.6088	21.6988	21.3515	21.4482	21.6078	21.8005	21.9198
P12242	UCP1_MOUSE	Ucp1	Mitochondrial brown fat uncoupling protein 1		0.0330753	0.117701		7	7	7	27.7	27.7	27.7	33.247	0	35.636	38683000	39	21.0307	22.3011	22.5204	21.2081	18.0981	19.5835	21.2567	18.8066
P12382	PFKAL_MOUSE	Pfkl	ATP-dependent 6-phosphofructokinase, liver type		1.13534	-0.85386		25	25	25	34.1	34.1	34.1	85.359	0	155.2	143150000	114	22.3127	21.1957	21.6453	21.6351	20.8524	22.582	22.5561	22.6279
P12787	COX5A_MOUSE	Cox5a	Cytochrome c oxidase subunit 5A, mitochondrial		0.803016	-0.445045		11	11	11	63	63	63	16.101	0	77.004	2637800000	431	26.0856	25.6191	25.7429	25.8038	25.779	26.6637	25.9073	26.7537
P12815	PDCD6_MOUSE	Pdcd6	Programmed cell death protein 6		0.396442	-0.912307		5	5	5	24.6	24.6	24.6	21.867	0	15.045	23390000	18	21.7587	21.6709	21.0612	17.8665	19.6025	20.1825	22.1059	21.1982
P12970	RL7A_MOUSE	Rpl7a	60S ribosomal protein L7a		0.203945	0.0400147		29	29	29	65.4	65.4	65.4	29.976	0	295.39	6237900000	1118	26.4386	26.642	26.484	26.6919	26.6464	26.7214	26.5148	26.5386
A0A494BAV5	A0A494BAV5_MOUSE	Scd2	Stearoyl-CoA desaturase 2		1.5143	-2.59848		9	3	3	47.4	29.3	29.3	24.575	0	24.192	41126000	37	19.1195	19.2183	23.1636	18.963	22.6568	22.0457	22.78	22.3623
P13020	GELS_MOUSE	Gsn	Gelsolin		1.12084	-0.41151		15	15	15	27.6	27.6	27.6	85.941	0	122.86	301820000	101	24.2544	24.405	24.1712	23.8235	23.8403	24.6063	24.4455	24.7461
P13516	ACOD1_MOUSE	Scd1	Acyl-CoA desaturase 1		0.851447	-0.346083		12	12	6	37.5	37.5	26.5	41.046	0	81.103	953840000	580	24.2313	24.5937	24.7906	24.1312	24.519	24.9434	24.2114	24.9139
P13707	GPDA_MOUSE	Gpd1	Glycerol-3-phosphate dehydrogenase [NAD(+)], cytoplasmic		1.12801	-0.134408		27	27	25	84	84	80.8	37.572	0	292.21	643350000	322	24.4739	24.6657	24.7721	24.5345	24.6551	24.7362	24.5953	24.7631
P14115	RL27A_MOUSE	Rpl27a	60S ribosomal protein L27a		1.21517	-0.579858		10	10	10	48	48	48	16.605	0	34.613	1544400000	284	25.8317	25.9634	25.7114	25.8532	25.5552	26.7675	26.6512	26.393
P14131	RS16_MOUSE	Rps16	40S ribosomal protein S16		0.283144	-0.0827799		19	19	19	77.4	77.4	77.4	16.445	0	58.537	3782200000	834	27.1175	26.9127	26.8893	27.1762	27.1918	27.3671	27.2083	27.2646
P14148	RL7_MOUSE	Rpl7	60S ribosomal protein L7		0.80429	-0.171107		30	30	30	60.7	60.7	60.7	31.419	0	101.96	6795900000	1554	27.685	27.8169	27.5861	27.512	27.5397	27.9277	27.9129	27.8113
P14152	MDHC_MOUSE	Mdh1	Malate dehydrogenase, cytoplasmic		1.32904	-0.375302		19	19	19	45.5	45.5	45.5	36.511	0	114.2	927190000	294	25.1497	24.7239	24.9806	24.8372	24.6086	25.1833	25.2102	25.4464
P14206	RSSA_MOUSE	Rpsa	40S ribosomal protein SA		0.0779394	-0.0241461		21	21	21	65.8	65.8	65.8	32.838	0	254.47	5832100000	871	27.6381	27.7265	27.5438	27.7831	27.7367	28.0382	27.7612	27.6379
P14211	CALR_MOUSE	Calr	Calreticulin		1.42365	-0.247949		42	42	42	74.3	74.3	74.3	47.994	0	323.31	5241900000	1695	25.9058	25.5863	25.9399	25.7314	25.9096	26.1793	25.9927	26.0131
P14483	HB2A_MOUSE	H2-Ab1	H-2 class II histocompatibility antigen, A beta chain		0.175961	-0.176595		9	9	9	39.2	39.2	39.2	30.128	0	46.682	21794000	28	20.0556	20.0192	20.4156	20.363	18.7674	19.9857	19.6123	19.8981
P14576	SRP54_MOUSE	Srp54	Signal recognition particle 54 kDa protein		0.183414	-0.313925		9	9	9	19	19	19	55.72	0	18.475	15384000	17	19.3991	18.5613	18.3221	19.8167	19.8584	20.5983	19.1429	20.8279
P14602	HSPB1_MOUSE	Hspb1	Heat shock protein beta-1		1.26334	0.909121		8	8	8	45.9	45.9	45.9	23.014	0	14.001	52410000	35	21.877	22.021	21.3903	22.5741	22.2187	20.2656	21.9004	21.498
P14685	PSMD3_MOUSE	Psmd3	26S proteasome non-ATPase regulatory subunit 3		1.07518	-1.05783		8	8	8	20.2	20.2	20.2	60.718	0	29.684	16971000	19	20.1234	18.6226	20.4883	18.1345	19.977	20.2293	19.9103	20.4609
P14869	RLA0_MOUSE	Rplp0	60S acidic ribosomal protein P0		0.920215	0.1766		23	23	23	66.9	66.9	66.9	34.216	0	308.69	4704100000	1050	26.9109	26.7888	26.7609	26.8877	26.849	26.8344	26.4094	26.7253
P15105	GLNA_MOUSE	Glul	Glutamine synthetase		0.871502	-0.284478		12	12	12	40.2	40.2	40.2	42.119	0	132.65	179080000	134	23.4885	23.6888	23.5805	23.5001	23.0284	23.5515	23.8132	23.8986
P15208	INSR_MOUSE	Insr	Insulin receptor		0.547326	0.334061		4	4	4	3.6	3.6	3.6	155.61	0	26.609	4114500	13	19.207	18.9198	18.8889	19.2864	18.2739	18.2688	18.8603	18.3327
P15532	NDKA_MOUSE	Nme1	Nucleoside diphosphate kinase A		1.21356	-1.57502		11	3	3	73.7	19.1	19.1	17.208	0	15.677	22971000	32	18.9761	18.8698	18.5678	19.0689	18.9554	21.362	20.6893	21.5514
P15535	B4GT1_MOUSE	B4galt1	Beta-1,4-galactosyltransferase 1		1.84855	-0.545123		14	14	14	35.1	35.1	35.1	44.411	0	124.51	675430000	250	24.6577	24.4321	25.1362	24.5834	24.9517	25.2459	24.9325	25.4909
P15920	VPP2_MOUSE	Atp6v0a2	V-type proton ATPase 116 kDa subunit a2		0.2214	-0.345248		5	5	5	6	6	6	98.144	0	18.918	22464000	29	21.1115	21.1464	21.0714	21.3088	18.7734	20.4799	20.9888	21.1811
P16015	CAH3_MOUSE	Ca3	Carbonic anhydrase 3		0.0776006	0.0282402		16	16	16	61.5	61.5	61.5	29.366	0	88.288	615530000	191	23.9076	24.4561	24.2933	24.2109	24.2978	24.1184	24.2961	24.0516
P16045	LEG1_MOUSE	Lgals1	Galectin-1		0.946467	-0.37315		5	5	5	48.1	48.1	48.1	14.866	0	30.209	111880000	55	22.5857	22.7782	22.7929	21.9765	22.0505	22.6738	22.7796	22.6371
P16330	CN37_MOUSE	Cnp	2,3-cyclic-nucleotide 3-phosphodiesterase		0.369239	-0.116808		15	15	15	34	34	34	47.123	0	38.701	63422000	71	20.9969	21.0853	20.7465	20.7117	20.769	21.1176	20.9446	21.2215
P16332	MUTA_MOUSE	Mmut	Methylmalonyl-CoA mutase, mitochondrial		0.376255	0.0470772		11	11	11	20.5	20.5	20.5	82.843	0	35.974	41395000	44	21.005	20.9039	20.9952	21.0405	21.0833	20.9047	20.8903	21.0541
P16546	SPTN1_MOUSE	Sptan1	Spectrin alpha chain, non-erythrocytic 1		2.86613	-0.357707		113	113	112	49	49	48.5	284.59	0	323.31	766590000	655	21.997	22.2409	22.4449	22.0499	22.1045	22.3974	22.5603	22.4205
P16675	PPGB_MOUSE	Ctsa	Lysosomal protective protein		0.716614	1.14897		3	3	3	6.8	6.8	6.8	53.844	0	7.5582	18218000	17	20.9211	19.0854	21.1487	20.8827	21.3699	18.6684	19.2563	18.5899
P16858	G3P_MOUSE	Gapdh	Glyceraldehyde-3-phosphate dehydrogenase		0.0694791	0.0225425		21	21	3	72.7	72.7	12.6	35.81	0	206.66	2175100000	681	26.2326	26.1214	25.9765	25.9424	26.136	26.3804	25.9687	26.0168
P17047	LAMP2_MOUSE	Lamp2	Lysosome-associated membrane glycoprotein 2		1.23241	2.95764		3	3	3	6.5	6.5	6.5	45.681	0	5.8174	53007000	25	23.021	23.317	18.1641	23.6882	23.7324	22.9965	22.2898	18.4776
P17182	ENOA_MOUSE	Eno1	Alpha-enolase		1.00378	-0.146554		35	35	35	76.5	76.5	76.5	47.14	0	323.31	2117400000	690	24.6907	24.5392	24.6449	24.4342	24.6807	24.6763	24.8306	24.7793
P17427	AP2A2_MOUSE	Ap2a2	AP-2 complex subunit alpha-2		1.07231	-0.204798		36	36	27	43.7	43.7	32.5	104.02	0	142.6	256130000	191	23.3688	23.3799	23.3834	23.0732	23.3839	23.6174	23.6149	23.4094
P17439	GLCM_MOUSE	Gba	Lysosomal acid glucosylceramidase		0.784868	-0.870609		6	6	6	13.8	13.8	13.8	57.621	0	21.859	22002000	22	19.2229	18.7251	20.5656	20.1118	21.1224	20.7164	21.0609	20.3218
P17563	SBP1_MOUSE	Selenbp1	Methanethiol oxidase		0.453642	0.460711		3	3	3	8.1	8.1	8.1	52.513	0	8.2193	3928900	7	19.9252	18.3976	17.7936	19.0043	19.3749	19.2056	19.1334	18.7266
P17665	COX7C_MOUSE	Cox7c	Cytochrome c oxidase subunit 7C, mitochondrial		0.155518	-0.23542		3	3	3	31.7	31.7	31.7	7.3325	0	6.9214	235350000	95	24.0863	23.8879	24.4357	22.3748	24.0848	23.1381	24.6524	23.1492
G3UVV4	G3UVV4_MOUSE	Hk1	Hexokinase		0.219893	-0.0866222		14	14	12	17.1	17.1	14.6	101.87	0	29.636	20008000	34	19.772	19.8587	19.9378	19.8354	19.439	20.0884	19.6932	19.5324
P17742	PPIA_MOUSE	Ppia	Peptidyl-prolyl cis-trans isomerase A		1.57757	-0.352794		13	13	13	81.1	81.1	81.1	17.971	0	144.87	1536100000	439	25.214	24.9811	25.1517	25.0025	25.2171	25.5457	25.5736	25.5548
P17751	TPIS_MOUSE	Tpi1	Triosephosphate isomerase		1.19527	-0.432254		16	16	16	74.3	74.3	74.3	26.712	0	95.302	468500000	359	23.2736	23.3148	23.2132	23.0602	23.431	23.7188	24.0183	23.8583
P17809	GTR1_MOUSE	Slc2a1	Solute carrier family 2, facilitated glucose transporter member 1		0.508775	-1.1641		6	6	6	14.2	14.2	14.2	53.984	0	13.747	37175000	22	21.5561	19.3199	18.9151	18.0028	20.4774	21.3129	22.1992	21.5854
Q61696	HS71A_MOUSE	Hspa1a	Heat shock 70 kDa protein 1A		0.932649	0.395867		25	18	12	43.1	33.1	23.1	70.078	0	75.85	130210000	105	21.9239	22.3188	21.9869	22.5531	21.9909	21.4412	22.1355	21.6396
F8WIR1	F8WIR1_MOUSE	Ctsd	Cathepsin D		0.055989	-0.0271225		20	20	20	51.5	51.5	51.5	44.215	0	111.03	502830000	221	24.2114	24.1269	24.0478	24.21	24.5117	24.0377	24.6295	24.4536
P18572	BASI_MOUSE	Bsg	Basigin		2.35349	-0.462587		9	9	9	21.9	21.9	21.9	42.444	0	44.18	487510000	134	23.6808	23.5499	23.8292	23.4442	23.2361	23.9181	24.0474	23.9667
P18760	COF1_MOUSE	Cfl1	Cofilin-1		0.602924	0.106777		16	16	14	74.1	74.1	63.3	18.559	0	132.54	254600000	140	22.4781	22.7118	22.3637	22.3995	22.6802	22.458	22.5159	22.505
P19096	FAS_MOUSE	Fasn	Fatty acid synthase		1.86486	-0.240177		181	181	181	75.7	75.7	75.7	272.43	0	323.31	24346000000	5441	28.128	28.0966	28.2111	28.0864	27.856	28.3138	28.2544	28.3485
P19157	GSTP1_MOUSE	Gstp1	Glutathione S-transferase P 1		2.3282	-0.661311		5	5	5	37.1	37.1	37.1	23.609	0	62.761	93414000	41	22.0859	21.9865	22.3069	21.7961	21.8952	22.7147	22.4576	22.9298
P19253	RL13A_MOUSE	Rpl13a	60S ribosomal protein L13a		0.955361	0.252973		18	18	18	55.7	55.7	55.7	23.464	0	44.798	2532200000	595	26.0203	26.2044	26.1153	26.2315	26.0419	25.6169	25.7037	26.0502
P19324	SERPH_MOUSE	Serpinh1	Serpin H1		1.00839	0.195807		15	15	15	39.1	39.1	39.1	46.533	0	78.679	213350000	115	22.5197	22.8484	22.3837	22.8757	22.6112	22.5319	22.6105	22.5457
P19536	COX5B_MOUSE	Cox5b	Cytochrome c oxidase subunit 5B, mitochondrial		0.618906	0.296816		12	12	12	78.1	78.1	78.1	13.813	0	47.7	925280000	575	24.4681	24.3025	24.7683	24.7153	24.4165	23.8757	24.1964	23.8747
P19783	COX41_MOUSE	Cox4i1	Cytochrome c oxidase subunit 4 isoform 1, mitochondrial		0.646655	0.17505		14	14	7	64.5	64.5	34.3	19.53	0	101.98	2651000000	502	26.4287	26.1978	26.0902	26.1667	26.1266	26.2918	25.7575	26.0801
P20029	BIP_MOUSE	Hspa5	Endoplasmic reticulum chaperone BiP		0.18581	-0.0494041		71	71	69	72.7	72.7	72.7	72.421	0	323.31	22212000000	5381	27.1323	27.267	27.0908	27.3414	27.3606	27.4262	27.5008	27.281
P20065	TYB4_MOUSE	Tmsb4x	Thymosin beta-4		1.12782	0.382156		3	3	3	40	40	40	5.6794	0	14.007	32762000	60	20.9291	20.7993	20.5125	20.9165	20.9015	20.6838	20.0128	20.8087
P20108	PRDX3_MOUSE	Prdx3	Thioredoxin-dependent peroxide reductase, mitochondrial		0.292175	0.133045		13	13	13	55.6	55.6	55.6	28.127	0	86.323	486630000	172	24.7918	24.1401	24.122	24.3977	24.7387	24.3342	24.6687	24.4111
P20152	VIME_MOUSE	Vim	Vimentin		0.103127	0.0400724		59	59	48	91	91	79.6	53.687	0	323.31	2109600000	1275	25.0744	25.37	25.3647	25.1241	25.5993	25.039	25.2467	25.3571
P20918	PLMN_MOUSE	Plg	Plasminogen		0.288011	0.14203		17	17	17	24	24	24	90.807	0	36.43	65925000	77	21.8212	21.4332	21.0477	21.0639	20.9317	21.2492	21.2383	21.1467
P21278	GNA11_MOUSE	Gna11	Guanine nucleotide-binding protein subunit alpha-11		0.673048	1.35204		8	6	6	23.7	18.4	18.4	42.024	0	18.326	17375000	18	18.7565	21.3086	21.4741	21.4025	21.471	18.338	18.9545	18.7638
P21279	GNAQ_MOUSE	Gnaq	Guanine nucleotide-binding protein G(q) subunit alpha		0.642118	1.1205		9	9	7	26.5	26.5	21.2	42.158	0	31.381	24761000	32	21.1491	21.556	21.2474	22.1563	21.4201	20.3516	21.961	18.2395
P21614	VTDB_MOUSE	Gc	Vitamin D-binding protein		0.958684	0.388478		9	9	9	18.3	18.3	18.3	53.6	0	19.835	37405000	42	20.6532	21.2721	20.6616	21.0344	20.4366	20.2864	20.553	20.3413
P21956	MFGM_MOUSE	Mfge8	Lactadherin		0.427434	0.169027		26	26	26	51.6	51.6	51.6	51.24	0	189.77	1673400000	888	24.4519	24.9335	24.1973	24.9287	24.5722	24.6616	24.7759	24.5754
P21958	TAP1_MOUSE	Tap1	Antigen peptide transporter 1		0.291635	0.260728		10	10	10	18.4	18.4	18.4	78.863	0	27.488	35307000	81	22.0545	21.0073	21.8599	22.3788	22.5739	22.0261	21.6772	21.4083
P21981	TGM2_MOUSE	Tgm2	Protein-glutamine gamma-glutamyltransferase 2		0.39387	-0.452347		10	10	10	17.9	17.9	17.9	77.06	0	36.408	39666000	43	19.0607	21.0249	20.5898	20.8122	20.9797	21.343	21.0799	20.6742
P22437	PGH1_MOUSE	Ptgs1	Prostaglandin G/H synthase 1		0.0346103	-0.0291348		12	12	12	26.2	26.2	26.2	69.042	0	26.25	111030000	65	21.8902	21.1591	22.3608	21.7384	22.1059	21.5787	21.4218	21.6487
P22599	A1AT2_MOUSE	Serpina1b	Alpha-1-antitrypsin 1-2		0.34019	-0.132541		16	6	4	41.6	16.5	8.7	45.974	0	22.201	55042000	40	21.5307	21.3914	21.0752	21.0987	21.3231	21.5444	21.5149	21.7395
P22892	AP1G1_MOUSE	Ap1g1	AP-1 complex subunit gamma-1		0.472441	0.47188		13	13	13	15.2	15.2	15.2	91.349	0	35.841	15946000	31	20.3021	19.7562	18.6611	20.8463	20.3475	20.2665	20.2059	20.231
P23116	EIF3A_MOUSE	Eif3a	Eukaryotic translation initiation factor 3 subunit A		1.04256	-1.0386		19	19	19	15.4	15.4	15.4	161.93	0	26.383	30414000	39	19.1729	17.855	20.3654	20.1956	19.8002	20.1758	20.4252	20.2117
Q543K9	Q543K9_MOUSE	Pnp	Purine nucleoside phosphorylase		1.22294	-1.33374		4	4	4	17.6	17.6	17.6	32.263	0	19.672	10828000	9	18.7217	19.3447	18.6792	18.8158	18.6288	20.289	21.3013	20.5764
P23780	BGAL_MOUSE	Glb1	Beta-galactosidase		0.381357	-0.601148		13	13	13	28.3	28.3	28.3	73.12	0	46.301	53484000	45	21.9807	21.3136	21.6517	19.0539	21.8741	21.4746	21.6432	21.8575
P23953	EST1C_MOUSE	Ces1c	Carboxylesterase 1C		0.281242	-0.268785		8	5	5	15	9.6	9.6	61.055	0	23.684	18795000	50	19.9891	19.7169	19.6	18.8965	19.5662	20.6058	19.0752	19.963
[truncated: 1,227 more rows]

## Sheet: Tab 3 MQ parameters
Parameter	Value
Version	1.6.17.0
[truncated: 107 more rows]

## Sheet: Tab 4 Perseus Processing
Process	Description
[truncated: 13 more rows]
