# Supplementary material for: Secretory pathway Ca-ATPase 2 (SPCA2) gene knockout results in mouse mammary gland changes and a secretory defect
Source: Research Square preprint supplement (doi:10.21203/rs.3.rs-830264/v1), 2021-08-26
Supplement: Supplementary file 2 [file 46a5abd4c857750097f126bb.docx]

**Supplementary data table 1 Mouse Mammary proteome**: Proteins identified with high confidence in whole tissue lysates can be seen in Tabs 1 and 2. All differential data are log2 transform numbers. The plus symbol indicates a protein whose expression was significantly differentially regulated in SPCA2 knockout mice compared to wild-type mice. Taps 3 and 4 provide data processing information for the reader. n=5 mice per group.

**Supplementary data table 2 Mouse Milk proteome:** Proteins identified with high confidence in milk whey’s can be seen in Tabs 1 and 2. All differential data are log2 transform numbers. The plus symbol indicates a protein whose expression was significantly differentially regulated in SPCA2 knockout mice compared to wild-type mice. Taps 3 and 4 provide data processing information for the reader. n=5 mice per group.

**Supplementary data table 3 Mouse Mammary Membrane proteome:**Proteins identified with high confidence in mammary membrane preparations can be seen in Tabs 1 and 2. All differential data are log2 transform numbers. The plus symbol indicates a protein whose expression was significantly differentially regulated in SPCA2 knockout mice compared to wild-type mice. Taps 3 and 4 provide data processing information for the reader.

n=5 mice per group.

**Supplementary Figure 1 full-size gels:** The full-size gels from which cropped images were used to make Figures 1-3.
