# Supplementary material for: Secretory pathway Ca-ATPase 2 (SPCA2) gene knockout results in mouse mammary gland changes and a secretory defect
Source: Research Square preprint supplement (doi:10.21203/rs.3.rs-830264/v1), 2021-08-26
Supplement: Supplementary file 3 [file 603ac02d458d86e1326b1b48.xlsx]

## Sheet: Tab 1 Data
Accession	ID	Gene Name	Description	Significant	.=-LOG(P-value)	Difference	Peptides	Razor + unique peptides	Unique peptides	Sequence coverage [%]	Unique + razor sequence coverage [%]	Unique sequence coverage [%]	Mol. weight [kDa]	Q-value	Score	Intensity	MS/MS count	93	117	156	157	158	166	171	193	196	197	199		Accession	ID	Gene Name	Description
P01592	IGJ_MOUSE	Jchain	Immunoglobulin J chain	+	3.76289	-1.25809	6	6	6	30.2	30.2	30.2	18.013	0	68.768	952710000	89	26.6309	25.041	24.9022	24.955	26.2695	NaN	NaN	25.9283	25.901	26.1655	26.45		P01592	IGJ_MOUSE	Jchain	Immunoglobulin J chain
A0A0A6YXW6	A0A0A6YXW6_MOUSE	Igha	Immunoglobulin heavy constant alpha (Fragment)	+	5.64693	-2.48158	16	16	16	66.8	66.8	66.8	41.958	0	323.31	16004000000	729	30.0811	27.5368	26.4932	27.8252	29.6735	27.0049	27.379	29.6394	29.3618	29.7481	29.8725		A0A0A6YXW6	A0A0A6YXW6_MOUSE	Igha	Immunoglobulin heavy constant alpha (Fragment)
A2A432	CUL4B_MOUSE	Cul4b	Cullin-4B		0.271479	-0.154658	15	9	9	18.6	11.4	11.4	110.7	0	29.393	126150000	57	22.2256	22.6429	22.6395	22.0258	22.5392	23.0979	22.5885	22.6961	23.3585	22.6076	23.0944		A2A432	CUL4B_MOUSE	Cul4b	Cullin-4B
A2A5R2	BIG2_MOUSE	Arfgef2	Brefeldin A-inhibited guanine nucleotide-exchange protein 2		0.304322	0.035642	58	58	44	40.1	40.1	31.7	202.24	0	323.31	2980000000	594	26.4227	26.474	26.5653	26.3414	26.5895	26.5333	26.5876	26.3924	26.454	26.4796	26.4498		A2A5R2	BIG2_MOUSE	Arfgef2	Brefeldin A-inhibited guanine nucleotide-exchange protein 2
A2A7S8	K1522_MOUSE	Kiaa1522	Uncharacterized protein KIAA1522		0.512682	0.171089	6	6	6	7.2	7.2	7.2	104.84	0.00030395	11.24	176480000	46	24.5051	24.5025	24.5356	24.1156	24.2273	23.8878	24.5902	23.9953	23.877	24.187	24.1398		A2A7S8	K1522_MOUSE	Kiaa1522	Uncharacterized protein KIAA1522
A2A863	ITB4_MOUSE	Itgb4	Integrin beta-4		1.20179	0.228346	31	31	2	22.8	22.8	1.8	201.65	0	69.835	776710000	184	24.5352	24.9355	24.8104	24.9144	24.52	25.1281	24.7897	24.7222	25.0018	24.8455	24.4989		A2A863	ITB4_MOUSE	Itgb4	Integrin beta-4
A2A8L5	PTPRF_MOUSE	Ptprf	Receptor-type tyrosine-protein phosphatase F		0.00712062	-0.0106335	6	6	6	4.2	4.2	4.2	211.49	0.00055127	7.7239	27796000	18	22.4991	22.5192	NaN	22.0124	NaN	NaN	NaN	NaN	22.7257	NaN	21.6044		A2A8L5	PTPRF_MOUSE	Ptprf	Receptor-type tyrosine-protein phosphatase F
F6UHR6	F6UHR6_MOUSE	Osbpl9	Oxysterol-binding protein		0.647614	0.165091	10	10	10	14	14	14	81.09	0	24.836	239650000	69	24.0388	24.6228	24.1911	24.5143	24.4264	24.7405	24.6423	24.2831	24.6673	24.4129	24.4342		F6UHR6	F6UHR6_MOUSE	Osbpl9	Oxysterol-binding protein
A2AAY5	SPD2B_MOUSE	Sh3pxd2b	SH3 and PX domain-containing protein 2B		1.0511	0.242769	6	6	6	10.8	10.8	10.8	101.52	0	15.017	215570000	32	22.9668	22.9268	23.087	23.4178	22.623	22.909	22.8631	NaN	22.9805	22.6968	22.7228		A2AAY5	SPD2B_MOUSE	Sh3pxd2b	SH3 and PX domain-containing protein 2B
A2ACP1	TT39A_MOUSE	Ttc39a	Tetratricopeptide repeat protein 39A		0.23921	0.0942134	11	11	11	22.1	22.1	22.1	66.126	0	54.558	503830000	105	23.8831	24.0905	24.0101	23.987	24.0897	23.6051	23.7727	23.9857	23.2608	23.5951	23.9788		A2ACP1	TT39A_MOUSE	Ttc39a	Tetratricopeptide repeat protein 39A
A2ADA5	PUSL1_MOUSE	Pusl1	tRNA pseudouridine synthase-like 1		0.19729	-0.259905	5	5	5	19.6	19.6	19.6	31.992	0	17.658	147300000	26	23.6425	23.1327	NaN	24.2383	23.8437	NaN	NaN	24.3499	NaN	NaN	NaN		A2ADA5	PUSL1_MOUSE	Pusl1	tRNA pseudouridine synthase-like 1
A2ADY9	DDI2_MOUSE	Ddi2	Protein DDI1 homolog 2		0.104617	-0.027546	16	16	16	53.4	53.4	53.4	44.59	0	137.04	1303500000	277	24.7307	24.7719	24.7931	24.6642	25.0278	24.5286	24.5198	24.6532	24.6039	24.5761	24.5069		A2ADY9	DDI2_MOUSE	Ddi2	Protein DDI1 homolog 2
A2AI05	NDOR1_MOUSE	Ndor1	NADPH-dependent diflavin oxidoreductase 1		0	0.0544346	4	4	4	9.7	9.7	9.7	67.182	0.0014757	4.8425	37314000	14	NaN	22.8873	23.0817	23.2277	NaN	23.5173	23.0005	NaN	NaN	NaN	23.0885		A2AI05	NDOR1_MOUSE	Ndor1	NADPH-dependent diflavin oxidoreductase 1
A2AJ88	PLPL7_MOUSE	Pnpla7	Patatin-like phospholipase domain-containing protein 7		0	NaN	4	4	4	4	4	4	150.49	0.0056651	3.5014	22530000	6	NaN	NaN	NaN	NaN	NaN	NaN	NaN	NaN	NaN	NaN	NaN		A2AJ88	PLPL7_MOUSE	Pnpla7	Patatin-like phospholipase domain-containing protein 7
F6WF36	F6WF36_MOUSE	Map7d1	MAP7 domain-containing protein 1 (Fragment)		0	NaN	3	3	3	6.9	6.9	6.9	65.168	0.0016819	4.3774	3694500	7	NaN	NaN	NaN	NaN	NaN	NaN	NaN	NaN	NaN	NaN	NaN		F6WF36	F6WF36_MOUSE	Map7d1	MAP7 domain-containing protein 1 (Fragment)
E9PYJ6	E9PYJ6_MOUSE	Focad	Focadhesin		0.720422	-0.446392	12	12	12	9.5	9.5	9.5	189.56	0	27.968	4705400000	57	28.3695	28.1133	28.4534	27.3371	29.2055	28.4029	28.314	28.4517	NaN	28.9596	27.8664		E9PYJ6	E9PYJ6_MOUSE	Focad	Focadhesin
A2ALW5	DJC25_MOUSE	Dnajc25	DnaJ homolog subfamily C member 25		0	-0.344596	3	3	3	9.5	9.5	9.5	41.937	0.0028409	4.1411	90990000	11	22.3572	NaN	NaN	22.1002	22.6363	NaN	NaN	NaN	NaN	NaN	22.3408		A2ALW5	DJC25_MOUSE	Dnajc25	DnaJ homolog subfamily C member 25
A2AN08	UBR4_MOUSE	Ubr4	E3 ubiquitin-protein ligase UBR4		1.00027	0.10258	77	77	77	20.8	20.8	20.8	572.28	0	323.31	1786600000	468	24.7812	25.0604	24.8639	24.9154	24.6607	24.8926	24.8528	24.7688	24.8944	24.8469	24.9346		A2AN08	UBR4_MOUSE	Ubr4	E3 ubiquitin-protein ligase UBR4
A2APY7	NDUF5_MOUSE	Ndufaf5	Arginine-hydroxylase NDUFAF5, mitochondrial		0	NaN	3	3	3	13.7	13.7	13.7	38.404	0.0016815	4.374	58753000	15	NaN	NaN	NaN	NaN	NaN	NaN	NaN	NaN	NaN	NaN	NaN		A2APY7	NDUF5_MOUSE	Ndufaf5	Arginine-hydroxylase NDUFAF5, mitochondrial
A2AQ19	RTF1_MOUSE	Rtf1	RNA polymerase-associated protein RTF1 homolog		0.637448	0.21607	3	3	3	5.2	5.2	5.2	80.796	0.00055664	8.003	55583000	19	21.087	NaN	NaN	21.3798	21.0889	NaN	21.5615	21.5448	NaN	21.1716	21.3804		A2AQ19	RTF1_MOUSE	Rtf1	RNA polymerase-associated protein RTF1 homolog
D3Z781	D3Z781_MOUSE	Etl4	Enhancer trap locus 4		0.0439234	-0.0440054	5	5	5	6.8	6.8	6.8	146.61	0	15.998	161190000	22	NaN	21.679	NaN	NaN	21.7089	NaN	21.2098	21.2679	NaN	NaN	NaN		D3Z781	D3Z781_MOUSE	Etl4	Enhancer trap locus 4
A2ARI4	LGR4_MOUSE	Lgr4	Leucine-rich repeat-containing G-protein coupled receptor 4		0	NaN	4	4	4	5	5	5	104.15	0.00052673	6.5116	23626000	13	NaN	NaN	NaN	NaN	20.782	NaN	NaN	21.6505	NaN	NaN	NaN		A2ARI4	LGR4_MOUSE	Lgr4	Leucine-rich repeat-containing G-protein coupled receptor 4
A2ARZ3	FSIP2_MOUSE	Fsip2	Fibrous sheath-interacting protein 2		0	NaN	4	4	4	1.3	1.3	1.3	784.85	0.0073057	3.2202	160850000	6	NaN	NaN	NaN	NaN	NaN	NaN	NaN	NaN	NaN	NaN	NaN		A2ARZ3	FSIP2_MOUSE	Fsip2	Fibrous sheath-interacting protein 2
Z4YK85	Z4YK85_MOUSE	Agrn	Agrin		0.0146335	-0.0101067	5	5	5	3.4	3.4	3.4	204.95	0	16.862	52481000	19	21.1303	NaN	NaN	21.0876	21.0807	NaN	21.4699	21.4355	21.7116	21.0863	NaN		Z4YK85	Z4YK85_MOUSE	Agrn	Agrin
A2ASS6	TITIN_MOUSE	Ttn	Titin		0.254347	-0.23169	15	15	15	0.6	0.6	0.6	3906.4	0.0003034	11.147	3282700000	103	27.0232	26.7691	27.4076	26.4793	27.1875	26.3141	28.1765	27.7283	NaN	26.8504	27.5158		A2ASS6	TITIN_MOUSE	Ttn	Titin
A2AT37	RENT2_MOUSE	Upf2	Regulator of nonsense transcripts 2		0.644348	-0.417526	4	4	4	5.1	5.1	5.1	147.55	0.0072767	3.1736	44106000	17	23.1946	22.617	NaN	22.2129	NaN	NaN	23.1923	22.9397	23.4821	NaN	22.7499		A2AT37	RENT2_MOUSE	Upf2	Regulator of nonsense transcripts 2
A2AWA9	RBGP1_MOUSE	Rabgap1	Rab GTPase-activating protein 1		0.667001	-0.298063	8	8	8	9.6	9.6	9.6	120.8	0	21.468	217740000	49	22.5126	22.704	22.2421	22.309	22.465	22.7079	22.6981	22.8821	23.6149	23.0188	22.4883		A2AWA9	RBGP1_MOUSE	Rabgap1	Rab GTPase-activating protein 1
A2AWP8	ARGAL_MOUSE	Arhgef10l	Rho guanine nucleotide exchange factor 10-like protein		0.70973	0.156262	15	15	15	17.3	17.3	17.3	139.99	0	45.419	454250000	90	24.5911	24.7686	24.657	24.424	24.208	24.2765	24.3382	24.1425	24.415	24.2977	24.3655		A2AWP8	ARGAL_MOUSE	Arhgef10l	Rho guanine nucleotide exchange factor 10-like protein
A2BDX3	MOCS3_MOUSE	Mocs3	Adenylyltransferase and sulfurtransferase MOCS3		1.45375	-0.256385	10	10	10	32.2	32.2	32.2	49.374	0	56.059	578210000	95	24.3845	24.2774	24.1696	24.1914	24.3571	24.4015	24.333	24.3562	24.8127	24.7811	24.4941		A2BDX3	MOCS3_MOUSE	Mocs3	Adenylyltransferase and sulfurtransferase MOCS3
A3KGB4	TBC8B_MOUSE	Tbc1d8b	TBC1 domain family member 8B		0	0.418576	6	6	6	7.7	7.7	7.7	127.89	0.0005534	7.8584	50759000	18	NaN	23.1379	NaN	NaN	22.4063	NaN	NaN	23.0323	NaN	NaN	NaN		A3KGB4	TBC8B_MOUSE	Tbc1d8b	TBC1 domain family member 8B
A3KMP2	TTC38_MOUSE	Ttc38	Tetratricopeptide repeat protein 38		0.0472738	-0.0109893	24	24	24	67.7	67.7	67.7	52.223	0	286.07	2977400000	440	26.9451	26.7737	26.7407	26.6466	26.7323	26.5585	26.7083	26.71	26.5488	26.4776	26.7655		A3KMP2	TTC38_MOUSE	Ttc38	Tetratricopeptide repeat protein 38
A6H5Y3	METH_MOUSE	Mtr	Methionine synthase		0.413153	0.201123	6	6	6	5.3	5.3	5.3	139.07	0.00028506	8.8543	86917000	25	23.1383	23.5758	22.9427	22.9073	22.8965	23.4536	NaN	23.0214	NaN	NaN	NaN		A6H5Y3	METH_MOUSE	Mtr	Methionine synthase
A6H5Z3	EXC6B_MOUSE	Exoc6b	Exocyst complex component 6B		0.030018	-0.0169096	7	7	7	14	14	14	94.128	0	17.181	86184000	35	NaN	NaN	23.3054	23.1024	23.6958	22.8461	23.2572	22.8997	23.0923	22.841	23.1945		A6H5Z3	EXC6B_MOUSE	Exoc6b	Exocyst complex component 6B
A6H611	MIPEP_MOUSE	Mipep	Mitochondrial intermediate peptidase		0.190536	-0.133246	6	6	6	11	11	11	80.851	0.00028169	8.459	99619000	41	22.2919	22.4942	22.2952	22.681	22.4443	23.1091	22.7473	23.3938	22.5781	23.609	22.4748		A6H611	MIPEP_MOUSE	Mipep	Mitochondrial intermediate peptidase
A6H630	ARMT1_MOUSE	Armt1	Damage-control phosphatase ARMT1		0.0748333	0.0512482	7	7	7	21.6	21.6	21.6	50.548	0	12.423	109290000	35	24.4725	24.377	24.3109	24.6557	23.8594	23.7947	24.8246	23.9958	24.726	NaN	24.6531		A6H630	ARMT1_MOUSE	Armt1	Damage-control phosphatase ARMT1
A6H8H2	DEN4C_MOUSE	Dennd4c	DENN domain-containing protein 4C		0.721903	0.504468	8	8	8	5.1	5.1	5.1	211.46	0.00028241	8.5653	61987000	25	NaN	22.1817	22.6262	22.0963	21.3086	22.8916	22.7039	22.5906	NaN	NaN	22.0872		A6H8H2	DEN4C_MOUSE	Dennd4c	DENN domain-containing protein 4C
A7L9Z8	AT2C2_MOUSE	Atp2c2	Calcium-transporting ATPase type 2C member 2		0	-5.68387	29	29	28	41.9	41.9	40	102.53	0	212.91	1180200000	193	25.71	20.1489	NaN	NaN	26.0185	NaN	NaN	25.7171	25.9087	25.974	25.6684		A7L9Z8	AT2C2_MOUSE	Atp2c2	Calcium-transporting ATPase type 2C member 2
A8C756	THADA_MOUSE	Thada	Thyroid adenoma-associated protein homolog		0	NaN	4	4	4	2.8	2.8	2.8	217.29	0.0026122	4.1948	16536000	7	NaN	NaN	NaN	NaN	NaN	NaN	NaN	NaN	NaN	NaN	NaN		A8C756	THADA_MOUSE	Thada	Thyroid adenoma-associated protein homolog
A8Y5H7	S14L1_MOUSE	Sec14l1	SEC14-like protein 1		0.0442921	-0.018428	7	7	7	12.6	12.6	12.6	81.215	0	18.515	134090000	53	22.8316	22.8923	22.8493	22.5174	22.8619	23.3156	23.0246	22.8575	23.2039	22.9364	NaN		A8Y5H7	S14L1_MOUSE	Sec14l1	SEC14-like protein 1
Z4YKM2	Z4YKM2_MOUSE	Cisd3	CDGSH iron-sulfur domain-containing protein 3, mitochondrial		0.230587	-0.124176	3	3	3	19.1	19.1	19.1	13.155	0.00028313	8.6443	381150000	34	NaN	NaN	24.9246	NaN	24.9736	25.103	25.113	25.1154	25.4647	25.5857	24.7158		Z4YKM2	Z4YKM2_MOUSE	Cisd3	CDGSH iron-sulfur domain-containing protein 3, mitochondrial
B1AVZ0	UPP_MOUSE	Uprt	Uracil phosphoribosyltransferase homolog		0.87738	-0.338092	2	2	2	8.7	8.7	8.7	34.278	0.0010355	5.9853	55286000	18	23.0962	NaN	22.8325	23.0083	23.0275	NaN	NaN	23.3378	NaN	23.6421	23.1888		B1AVZ0	UPP_MOUSE	Uprt	Uracil phosphoribosyltransferase homolog
B1AY13	UBP24_MOUSE	Usp24	Ubiquitin carboxyl-terminal hydrolase 24		0.600912	-0.127946	37	37	37	19.4	19.4	19.4	294	0	60.804	906020000	185	24.8414	24.9869	24.8899	24.6775	24.9682	24.8952	25.1655	25.0003	25.3449	25.0927	25.058		B1AY13	UBP24_MOUSE	Usp24	Ubiquitin carboxyl-terminal hydrolase 24
I1E4X0	I1E4X0_MOUSE	Dlgap4	Disks large-associated protein 4		1.32239	0.389299	4	4	3	23.4	23.4	15.6	26.903	0.00053206	6.7274	104390000	21	21.8465	22.2812	22.0761	22.3272	22.1886	NaN	NaN	21.5887	NaN	21.627	21.9434		I1E4X0	I1E4X0_MOUSE	Dlgap4	Disks large-associated protein 4
E9QAI5	E9QAI5_MOUSE	Cad	Aspartate carbamoyltransferase		0.191028	-0.0370351	41	41	41	25.8	25.8	25.8	236.25	0	92.02	1228500000	282	24.9744	25.0693	24.9577	24.777	24.9752	25.1008	25.0781	24.8644	25.1831	25.1637	25.0408		E9QAI5	E9QAI5_MOUSE	Cad	Aspartate carbamoyltransferase
A0A0R4J260	A0A0R4J260_MOUSE	Otud4	Ubiquitinyl hydrolase 1		0.290697	0.145433	6	6	6	7.7	7.7	7.7	122.93	0	15.847	90887000	45	22.7361	22.2386	22.7079	22.4486	21.9883	22.9844	22.9947	22.6511	NaN	22.4298	22.8418		A0A0R4J260	A0A0R4J260_MOUSE	Otud4	Ubiquitinyl hydrolase 1
B2RXC1	TPC11_MOUSE	Trappc11	Trafficking protein particle complex subunit 11		0.149833	0.0378987	18	18	18	22.3	22.3	22.3	128.39	0	55.521	678310000	159	25.3457	25.2136	25.3869	24.9683	25.053	25.4782	25.1623	25.1534	25.1372	25.3659	25.1686		B2RXC1	TPC11_MOUSE	Trappc11	Trafficking protein particle complex subunit 11
B2RXS4	PLXB2_MOUSE	Plxnb2	Plexin-B2		0.998652	0.132701	19	19	19	13.2	13.2	13.2	206.23	0	55.935	626200000	133	25.0737	25.37	25.2116	25.038	25.1386	25.2017	25.4483	25.0749	25.0368	25.231	25.1724		B2RXS4	PLXB2_MOUSE	Plxnb2	Plexin-B2
B2RY56	RBM25_MOUSE	Rbm25	RNA-binding protein 25		0.485243	0.246836	8	8	8	11.6	11.6	11.6	99.551	0.00029674	10.376	208280000	30	22.9325	22.9967	22.8214	22.4867	22.206	23.3412	23.4253	22.6324	23.1844	23.1853	22.4641		B2RY56	RBM25_MOUSE	Rbm25	RNA-binding protein 25
B7ZMP1	XPP3_MOUSE	Xpnpep3	Xaa-Pro aminopeptidase 3		0	NaN	4	4	4	9.3	9.3	9.3	56.677	0.0014822	4.9114	32468000	8	NaN	NaN	NaN	NaN	NaN	NaN	NaN	NaN	NaN	NaN	NaN		B7ZMP1	XPP3_MOUSE	Xpnpep3	Xaa-Pro aminopeptidase 3
A0A5F8MPV7	A0A5F8MPV7_MOUSE	Qtrt2	Queuine tRNA-ribosyltransferase accessory subunit 2		0	NaN	2	2	2	8.5	8.5	8.5	29.464	0.003305	4.0875	8046400	6	NaN	NaN	NaN	NaN	NaN	NaN	NaN	NaN	NaN	NaN	NaN		A0A5F8MPV7	A0A5F8MPV7_MOUSE	Qtrt2	Queuine tRNA-ribosyltransferase accessory subunit 2
B9EJ80	PDZD8_MOUSE	Pdzd8	PDZ domain-containing protein 8		0	NaN	3	3	3	4.3	4.3	4.3	127.74	0.0060579	3.3816	10251000	2	NaN	NaN	NaN	NaN	NaN	NaN	NaN	NaN	NaN	NaN	NaN		B9EJ80	PDZD8_MOUSE	Pdzd8	PDZ domain-containing protein 8
B9EJ86	OSBL8_MOUSE	Osbpl8	Oxysterol-binding protein-related protein 8		0.00715718	0.00293732	3	3	3	4.3	4.3	4.3	101.27	0.0015	5.1891	94366000	36	23.9998	23.6453	24.3871	24.2442	NaN	23.9305	24.0423	24.0017	24.2352	24.0779	23.9202		B9EJ86	OSBL8_MOUSE	Osbpl8	Oxysterol-binding protein-related protein 8
B9EJR8	DAAF5_MOUSE	Dnaaf5	Dynein assembly factor 5, axonemal		0	-0.885566	7	7	7	13.5	13.5	13.5	93.85	0	12.018	61139000	24	23.0485	22.8543	NaN	NaN	24.3357	NaN	NaN	NaN	NaN	NaN	23.8355		B9EJR8	DAAF5_MOUSE	Dnaaf5	Dynein assembly factor 5, axonemal
B9EKI3	TMF1_MOUSE	Tmf1	TATA element modulatory factor		0.643442	-0.16282	8	8	8	8.2	8.2	8.2	121.8	0	15.326	108530000	32	21.4686	21.4036	21.4303	21.4345	21.5613	21.2838	21.6373	22.0043	21.5098	21.7778	21.2825		B9EKI3	TMF1_MOUSE	Tmf1	TATA element modulatory factor
A0A0N4SV66	A0A0N4SV66_MOUSE	H2aj	Histone H2A		0.0336049	-0.026575	8	8	2	60.3	60.3	14.3	13.66	0	323.31	14147000000	580	29.4768	30.4232	29.249	29.3951	30.2042	29.7117	29.8897	29.7382	30.2493	29.0511	29.8421		A0A0N4SV66	A0A0N4SV66_MOUSE	H2aj	Histone H2A
A0A338P7E3	A0A338P7E3_MOUSE	Rnaset2b	Ribonuclease T2-B		0.315748	-0.0796561	5	5	5	31.3	31.3	31.3	18.783	0.00030157	10.884	442270000	54	25.8634	NaN	25.722	25.9683	25.9641	26.0501	25.9428	25.8815	25.8828	26.3365	26.0746		A0A338P7E3	A0A338P7E3_MOUSE	Rnaset2b	Ribonuclease T2-B
S4R1M2	S4R1M2_MOUSE	Safb	Scaffold attachment factor B1		0.33044	0.22179	6	6	4	9.3	9.3	6.7	105.32	0	20.256	132740000	31	NaN	23.7033	23.9028	23.5051	NaN	24.4703	23.7242	23.1041	23.9903	24.1348	23.3281		S4R1M2	S4R1M2_MOUSE	Safb	Scaffold attachment factor B1
D3YZP9	CCDC6_MOUSE	Ccdc6	Coiled-coil domain-containing protein 6		0.0684477	0.0312745	13	13	13	30.9	30.9	30.9	52.938	0	183.14	373720000	101	24.9518	25.2348	25.0249	25.1597	25.423	24.8679	24.5747	24.7183	24.9841	24.9618	24.6078		D3YZP9	CCDC6_MOUSE	Ccdc6	Coiled-coil domain-containing protein 6
D3Z4S3	PTRD1_MOUSE	Ptrhd1	Putative peptidyl-tRNA hydrolase PTRHD1		0.205565	-0.189087	5	5	5	49.3	49.3	49.3	16.037	0	59.821	629950000	51	27.2976	27.2138	27.1093	27.1625	27.9827	26.2677	26.7575	27.1041	26.8903	25.7811	27.4917		D3Z4S3	PTRD1_MOUSE	Ptrhd1	Putative peptidyl-tRNA hydrolase PTRHD1
S4R1B8	S4R1B8_MOUSE	Bin2	Bridging integrator 2		0	0.11537	4	4	4	10.9	10.9	10.9	51.582	0.0016904	4.4818	36389000	12	21.2983	21.4137	NaN	NaN	NaN	NaN	NaN	NaN	NaN	NaN	NaN		S4R1B8	S4R1B8_MOUSE	Bin2	Bridging integrator 2
D3Z7P3	GLSK_MOUSE	Gls	Glutaminase kidney isoform, mitochondrial		0	0.171765	4	4	4	8.8	8.8	8.8	73.963	0	13.014	151990000	13	24.5204	NaN	NaN	24.4188	NaN	24.9655	NaN	NaN	NaN	NaN	NaN		D3Z7P3	GLSK_MOUSE	Gls	Glutaminase kidney isoform, mitochondrial
D3Z7Q2	SIM20_MOUSE	Smim20	Small integral membrane protein 20		0	0.0441399	2	2	2	33.3	33.3	33.3	7.818	0.0039526	3.8654	19128000	5	NaN	NaN	NaN	22.1237	NaN	NaN	NaN	NaN	22.0796	NaN	NaN		D3Z7Q2	SIM20_MOUSE	Smim20	Small integral membrane protein 20
E9PUQ9	E9PUQ9_MOUSE	Piezo1	Piezo-type mechanosensitive ion channel component		0	0.149578	7	7	7	4	4	4	291.99	0.00028145	8.4455	47895000	19	22.9118	23.0334	NaN	NaN	NaN	NaN	NaN	22.8558	NaN	NaN	NaN		E9PUQ9	E9PUQ9_MOUSE	Piezo1	Piezo-type mechanosensitive ion channel component
E9PV24	FIBA_MOUSE	Fga	Fibrinogen alpha chain		1.20331	-0.236377	23	23	23	30.3	30.3	30.3	87.428	0	323.31	7521200000	583	25.8694	26.0274	25.8012	26.0802	26.2172	26.0031	25.998	26.4204	26.2883	26.0472	26.4676		E9PV24	FIBA_MOUSE	Fga	Fibrinogen alpha chain
E9PVA8	GCN1_MOUSE	Gcn1	eIF-2-alpha kinase activator GCN1		0.507726	-0.0703826	143	143	143	61.2	61.2	61.2	293.02	0	323.31	12653000000	2103	27.1421	27.17	27.0857	26.95	27.086	26.7695	26.9916	27.0315	27.0939	27.0038	27.0253		E9PVA8	GCN1_MOUSE	Gcn1	eIF-2-alpha kinase activator GCN1
A2AFY7	A2AFY7_MOUSE	Ttc17	Tetratricopeptide repeat protein 17		0	NaN	4	4	4	5.8	5.8	5.8	108.13	0.0056548	3.4778	38502000	13	24.2605	NaN	NaN	NaN	NaN	NaN	NaN	NaN	NaN	NaN	24.1769		A2AFY7	A2AFY7_MOUSE	Ttc17	Tetratricopeptide repeat protein 17
E9PYK3	PARP4_MOUSE	Parp4	Protein mono-ADP-ribosyltransferase PARP4		0.525495	0.202124	4	4	4	2.7	2.7	2.7	216.13	0.0015256	5.4998	30358000	21	21.2104	21.2626	NaN	21.0155	NaN	21.2592	21.4602	NaN	NaN	NaN	20.8841		E9PYK3	PARP4_MOUSE	Parp4	Protein mono-ADP-ribosyltransferase PARP4
E9PZJ8	ASCC3_MOUSE	Ascc3	Activating signal cointegrator 1 complex subunit 3		0.494097	0.262218	16	16	16	9.6	9.6	9.6	250.55	0	25.626	196890000	70	24.3867	24.2515	24.4796	24.333	23.5616	25.1347	24.6573	24.2246	24.7718	24.776	24.1333		E9PZJ8	ASCC3_MOUSE	Ascc3	Activating signal cointegrator 1 complex subunit 3
E9Q137	TX264_MOUSE	Tex264	Testis-expressed protein 264 homolog		0.154448	0.0655048	3	3	3	9.7	9.7	9.7	33.589	0.0050034	3.5494	85575000	28	NaN	23.0726	23.4201	23.4753	22.965	23.6251	23.229	23.1808	23.4748	23.7191	23.1548		E9Q137	TX264_MOUSE	Tex264	Testis-expressed protein 264 homolog
E9Q1P8	I2BP2_MOUSE	Irf2bp2	Interferon regulatory factor 2-binding protein 2		0	0.0172367	6	6	5	18.9	18.9	16.1	59.291	0	27.738	131940000	18	NaN	23.328	NaN	23.3248	NaN	23.5533	NaN	NaN	NaN	23.3848	NaN		E9Q1P8	I2BP2_MOUSE	Irf2bp2	Interferon regulatory factor 2-binding protein 2
E9Q3E1	AL3B2_MOUSE	Aldh3b2	Aldehyde dehydrogenase family 3 member B2		0	0.628204	4	4	4	9.2	9.2	9.2	52.982	0.0016799	4.3589	31868000	13	NaN	23.1209	NaN	NaN	22.4927	NaN	NaN	NaN	NaN	NaN	NaN		E9Q3E1	AL3B2_MOUSE	Aldh3b2	Aldehyde dehydrogenase family 3 member B2
E9Q3L2	PI4KA_MOUSE	Pi4ka	Phosphatidylinositol 4-kinase alpha		0.170668	-0.110868	17	17	17	11.2	11.2	11.2	237.04	0	30.975	106240000	45	23.5691	23.2597	22.9977	23.073	23.4425	22.6881	23.0776	NaN	NaN	22.3988	23.1099		E9Q3L2	PI4KA_MOUSE	Pi4ka	Phosphatidylinositol 4-kinase alpha
E9Q414	APOB_MOUSE	Apob	Apolipoprotein B-100		0	-0.0594435	6	6	6	1.5	1.5	1.5	509.43	0.0015349	5.6217	320800000	20	NaN	24.5964	24.1626	24.4028	NaN	24.3472	NaN	24.4367	NaN	NaN	NaN		E9Q414	APOB_MOUSE	Apob	Apolipoprotein B-100
E9Q4P1	WDFY1_MOUSE	Wdfy1	WD repeat and FYVE domain-containing protein 1		0.695557	-0.32504	4	4	4	14.4	14.4	14.4	46.217	0.00054496	7.4239	58504000	16	NaN	22.755	22.7098	23.2724	23.1619	22.6647	NaN	NaN	NaN	NaN	23.1891		E9Q4P1	WDFY1_MOUSE	Wdfy1	WD repeat and FYVE domain-containing protein 1
E9Q4Z2	ACACB_MOUSE	Acacb	Acetyl-CoA carboxylase 2		1.06306	-0.170688	150	134	134	72.6	66.3	66.3	275.75	0	323.31	32079000000	3497	28.8339	28.6429	28.845	28.5562	28.9033	28.3227	28.5498	28.7748	28.665	28.6474	28.6998		E9Q4Z2	ACACB_MOUSE	Acacb	Acetyl-CoA carboxylase 2
E9Q555	RN213_MOUSE	Rnf213	E3 ubiquitin-protein ligase RNF213		0.0176112	0.0114207	132	132	132	32.6	32.6	32.6	584.78	0	323.31	4752300000	950	25.5905	25.6932	25.2502	25.7779	25.5036	25.7197	26.6112	25.8325	25.9819	26.0752	25.8104		E9Q555	RN213_MOUSE	Rnf213	E3 ubiquitin-protein ligase RNF213
E9PZW0	E9PZW0_MOUSE	Dsp	Desmoplakin		0	-0.289529	5	5	5	1.9	1.9	1.9	261.42	0.0026073	4.1624	145360000	14	25.613	25.8182	NaN	NaN	NaN	NaN	NaN	NaN	NaN	26.6026	NaN		E9PZW0	E9PZW0_MOUSE	Dsp	Desmoplakin
E9Q634	MYO1E_MOUSE	Myo1e	Unconventional myosin-Ie		1.00459	0.336261	10	10	8	11.3	11.3	8.7	126.82	0	32.305	163060000	45	NaN	23.7792	23.8327	23.3725	NaN	23.494	23.3753	NaN	23.3948	23.3782	22.9304		E9Q634	MYO1E_MOUSE	Myo1e	Unconventional myosin-Ie
E9Q735	UBE4A_MOUSE	Ube4a	Ubiquitin conjugation factor E4 A		0	0.276011	5	5	5	7.5	7.5	7.5	118.2	0	16.872	80508000	25	23.4527	NaN	NaN	23.5568	NaN	NaN	23.9007	NaN	NaN	NaN	NaN		E9Q735	UBE4A_MOUSE	Ube4a	Ubiquitin conjugation factor E4 A
E9Q7D5	ARHG5_MOUSE	Arhgef5	Rho guanine nucleotide exchange factor 5		0.0582173	0.015805	16	16	16	13.9	13.9	13.9	176.66	0	29.995	295500000	86	24.2037	24.2929	24.2265	24.2411	24.3663	24.3881	24.2856	24.3919	24.0163	24.5665	24.0815		E9Q7D5	ARHG5_MOUSE	Arhgef5	Rho guanine nucleotide exchange factor 5
E9Q7G0	NUMA1_MOUSE	Numa1	Nuclear mitotic apparatus protein 1		0.626147	0.247284	14	14	14	9.3	9.3	9.3	235.63	0	35.266	289720000	35	23.7554	23.629	NaN	23.9842	NaN	23.6735	24.2623	NaN	23.294	23.7888	23.7217		E9Q7G0	NUMA1_MOUSE	Numa1	Nuclear mitotic apparatus protein 1
E9Q8D0	DJC21_MOUSE	Dnajc21	DnaJ homolog subfamily C member 21		0	NaN	1	1	1	4.7	4.7	4.7	61.734	0.00028944	9.4155	1848400	1	NaN	NaN	NaN	NaN	NaN	NaN	NaN	NaN	NaN	NaN	NaN		E9Q8D0	DJC21_MOUSE	Dnajc21	DnaJ homolog subfamily C member 21
E9Q8T7	DYH1_MOUSE	Dnah1	Dynein heavy chain 1, axonemal		0	0.0587082	4	4	4	1.4	1.4	1.4	487.06	0.0035344	4.0691	284530000	27	NaN	NaN	NaN	24.1706	24.1119	NaN	NaN	NaN	NaN	NaN	NaN		E9Q8T7	DYH1_MOUSE	Dnah1	Dynein heavy chain 1, axonemal
A2AS05	A2AS05_MOUSE	Helz2	Helicase with zinc finger domain 2		0.626221	0.248717	9	9	9	4	4	4	326.59	0.00028877	9.3668	368270000	32	24.4545	24.4138	25.0376	24.1766	24.5028	24.4947	24.9666	24.2364	24.6085	NaN	24.0435		A2AS05	A2AS05_MOUSE	Helz2	Helicase with zinc finger domain 2
E9QAT4	SC16A_MOUSE	Sec16a	Protein transport protein Sec16A		0.679997	0.0893229	42	42	42	28	28	28	254.2	0	323.31	2467400000	453	26.7019	26.7595	26.9911	26.7998	26.7089	27.0402	26.8563	26.8877	26.9402	26.8109	26.7507		E9QAT4	SC16A_MOUSE	Sec16a	Protein transport protein Sec16A
F8VPU2	FARP1_MOUSE	Farp1	FERM, ARHGEF and pleckstrin domain-containing protein 1		0.345294	-0.103621	8	8	8	10.2	10.2	10.2	118.87	0	13.507	144890000	48	23.745	23.9931	23.3979	23.5844	23.6892	23.6856	23.8578	23.6919	24.0976	24.0277	23.5927		F8VPU2	FARP1_MOUSE	Farp1	FERM, ARHGEF and pleckstrin domain-containing protein 1
G3X9K3	BIG1_MOUSE	Arfgef1	Brefeldin A-inhibited guanine nucleotide-exchange protein 1		0.0602406	0.0128293	41	27	27	26.9	19.4	19.4	208.5	0	67.484	802980000	154	25.2282	25.1129	25.3418	25.097	25.259	25.3271	25.0403	24.9772	25.1176	25.2862	25.1577		G3X9K3	BIG1_MOUSE	Arfgef1	Brefeldin A-inhibited guanine nucleotide-exchange protein 1
G5E829	AT2B1_MOUSE	Atp2b1	Plasma membrane calcium-transporting ATPase 1		0.316686	0.111565	19	12	9	21.6	16.8	12.8	134.75	0	31.186	161890000	55	22.7796	23.1385	22.5454	22.7215	22.6217	22.6855	23.1482	NaN	22.4987	23.015	22.7663		G5E829	AT2B1_MOUSE	Atp2b1	Plasma membrane calcium-transporting ATPase 1
A0A087WNZ7	A0A087WNZ7_MOUSE	Trip12	E3 ubiquitin-protein ligase TRIP12		0.595469	0.237756	11	11	11	7.5	7.5	7.5	220.66	0	16.436	198140000	62	23.7526	23.7797	23.6373	23.8343	23.241	24.2567	24.0617	23.5924	23.6067	24.3537	23.5106		A0A087WNZ7	A0A087WNZ7_MOUSE	Trip12	E3 ubiquitin-protein ligase TRIP12
G5E897	PLGT3_MOUSE	Poglut3	Protein O-glucosyltransferase 3		0	NaN	4	4	4	10.1	10.1	10.1	57.685	0.00055679	8.0034	27422000	11	NaN	NaN	NaN	NaN	NaN	NaN	NaN	NaN	NaN	NaN	NaN		G5E897	PLGT3_MOUSE	Poglut3	Protein O-glucosyltransferase 3
G5E8K5	ANK3_MOUSE	Ank3	Ankyrin-3		0.714325	-0.755651	8	8	6	6.5	6.5	5.4	214.06	0.0005339	6.8072	124570000	18	23.2482	NaN	22.7356	23.1708	NaN	NaN	NaN	NaN	NaN	24.3404	23.538		G5E8K5	ANK3_MOUSE	Ank3	Ankyrin-3
O08528	HXK2_MOUSE	Hk2	Hexokinase-2		1.7592	-0.161178	48	44	42	57	55	53.8	102.53	0	323.31	5691500000	814	25.7082	25.555	25.5932	25.5806	25.5875	25.6718	25.6583	25.849	25.8293	25.905	25.7587		O08528	HXK2_MOUSE	Hk2	Hexokinase-2
O08529	CAN2_MOUSE	Capn2	Calpain-2 catalytic subunit		0.208524	0.047534	27	27	27	46.7	46.7	46.7	79.871	0	323.31	2116500000	391	26.2992	26.5841	26.2837	26.3505	26.3412	26.4395	26.3207	26.035	26.4715	26.5224	26.4195		O08529	CAN2_MOUSE	Capn2	Calpain-2 catalytic subunit
A0A3Q4EBK4	A0A3Q4EBK4_MOUSE	Bin1	Myc box-dependent-interacting protein 1		0.731738	0.161657	9	9	9	37.6	37.6	37.6	45.786	0	69.061	543190000	73	23.7336	24.4791	24.204	24.0684	24.1441	23.8931	24.1643	24.0026	24.0821	24.1405	23.898		A0A3Q4EBK4	A0A3Q4EBK4_MOUSE	Bin1	Myc box-dependent-interacting protein 1
O08547	SC22B_MOUSE	Sec22b	Vesicle-trafficking protein SEC22b		0.547489	-0.0860511	15	15	15	53	53	53	24.74	0	323.31	4618300000	629	27.5971	27.6779	27.619	27.6428	27.8938	27.5379	27.4431	27.778	27.4843	27.6411	27.627		O08547	SC22B_MOUSE	Sec22b	Vesicle-trafficking protein SEC22b
O08553	DPYL2_MOUSE	Dpysl2	Dihydropyrimidinase-related protein 2		0.217382	-0.0440738	31	31	27	70.6	70.6	62.9	62.277	0	323.31	7091300000	879	26.5301	26.4137	26.2147	26.4043	26.3089	26.0691	26.4565	26.215	26.3348	26.3202	26.4255		O08553	DPYL2_MOUSE	Dpysl2	Dihydropyrimidinase-related protein 2
B1AQR8	B1AQR8_MOUSE	Lgals9	Galectin		0.707187	0.462759	10	10	10	45.2	45.2	45.2	39.907	0	119.17	557660000	86	25.2112	25.1308	25.1038	24.9961	24.8332	25.6306	26.8664	25.3257	24.7517	25.2492	25.1256		B1AQR8	B1AQR8_MOUSE	Lgals9	Galectin
O08579	EMD_MOUSE	Emd	Emerin		0.486793	-0.120112	7	7	7	35.9	35.9	35.9	29.435	0	25.604	253060000	82	24.2241	24.394	24.02	24.0683	24.3058	23.7395	23.9767	23.9462	24.2307	24.2463	24.0057		O08579	EMD_MOUSE	Emd	Emerin
O08581	KCNK1_MOUSE	Kcnk1	Potassium channel subfamily K member 1		0	NaN	3	3	3	14.3	14.3	14.3	38.201	0	23.279	28889000	16	NaN	NaN	NaN	NaN	NaN	NaN	NaN	23.2644	23.6308	NaN	23.2897		O08581	KCNK1_MOUSE	Kcnk1	Potassium channel subfamily K member 1
O08582	GTPB1_MOUSE	Gtpbp1	GTP-binding protein 1		0.716598	-0.169632	12	12	12	25	25	25	72.3	0	34.829	459110000	82	23.7064	23.9823	23.7548	23.7188	23.9561	23.6396	24.116	24.0527	24.3205	23.9783	24.0577		O08582	GTPB1_MOUSE	Gtpbp1	GTP-binding protein 1
O08583	THOC4_MOUSE	Alyref	THO complex subunit 4		0.920586	0.20707	6	6	6	35.7	35.7	35.7	26.94	0	28.239	1392500000	105	26.0239	25.7395	26.0175	25.922	25.4098	26.2004	26.0924	25.7757	25.7033	25.891	25.9201		O08583	THOC4_MOUSE	Alyref	THO complex subunit 4
O08586	PTEN_MOUSE	Pten	Phosphatidylinositol 3,4,5-trisphosphate 3-phosphatase and dual-specificity protein phosphatase PTEN		0	NaN	3	3	3	7.4	7.4	7.4	47.152	0.0089305	2.9932	9009200	5	NaN	NaN	NaN	NaN	NaN	NaN	NaN	NaN	NaN	NaN	NaN		O08586	PTEN_MOUSE	Pten	Phosphatidylinositol 3,4,5-trisphosphate 3-phosphatase and dual-specificity protein phosphatase PTEN
O08600	NUCG_MOUSE	Endog	Endonuclease G, mitochondrial		0.567552	0.192502	7	7	7	32.7	32.7	32.7	32.19	0	17.772	393140000	72	24.2347	24.3987	24.7138	24.5904	24.7836	24.9946	24.3636	24.6484	24.0083	24.4838	24.3596		O08600	NUCG_MOUSE	Endog	Endonuclease G, mitochondrial
O08663	MAP2_MOUSE	Metap2	Methionine aminopeptidase 2		0.540244	-0.0673318	19	19	19	47.3	47.3	47.3	52.921	0	175.7	1975200000	260	26.3493	26.29	26.3297	26.2926	26.3	26.242	26.4138	26.2235	26.5625	26.4547	26.3956		O08663	MAP2_MOUSE	Metap2	Methionine aminopeptidase 2
A0A0R4J038	A0A0R4J038_MOUSE	Kng1	Bradykinin		2.08586	-0.260573	23	23	20	35.4	35.4	31	73.1	0	323.31	19839000000	1183	28.4969	27.9302	27.9259	28.2932	28.2852	28.1395	28.0237	28.2365	28.2415	28.3794	28.2989		A0A0R4J038	A0A0R4J038_MOUSE	Kng1	Bradykinin
O08688	CAN5_MOUSE	Capn5	Calpain-5		0.617118	-0.193501	8	8	8	16.1	16.1	16.1	72.954	0	13.903	206500000	55	23.8331	23.7826	23.8077	23.4769	23.8479	23.8023	24.1024	24.0022	24.0813	24.4805	23.6823		O08688	CAN5_MOUSE	Capn5	Calpain-5
O08691	ARGI2_MOUSE	Arg2	Arginase-2, mitochondrial		0.591383	-0.12524	17	17	17	74.3	74.3	74.3	38.878	0	323.31	5913900000	608	27.3238	26.8796	27.2334	26.9742	27.2887	27.0814	26.97	27.2922	26.9619	27.1879	26.8634		O08691	ARGI2_MOUSE	Arg2	Arginase-2, mitochondrial
O08692	NGP_MOUSE	Ngp	Neutrophilic granule protein		0.512115	0.566009	9	9	9	56.9	56.9	56.9	19.331	0	115.75	910260000	152	25.0352	26.7558	24.9541	25.3234	25.2758	25.5926	27.4448	25.2543	NaN	25.349	26.3265		O08692	NGP_MOUSE	Ngp	Neutrophilic granule protein
O08715	AKAP1_MOUSE	Akap1	A-kinase anchor protein 1, mitochondrial		0.245824	0.0696432	17	17	17	28.6	28.6	28.6	92.194	0	33.031	542450000	114	24.2138	23.9273	24.2531	24.3617	24.2296	24.611	24.3301	24.3984	24.086	24.3695	24.0647		O08715	AKAP1_MOUSE	Akap1	A-kinase anchor protein 1, mitochondrial
F7CUQ1	F7CUQ1_MOUSE	Bak1	Bcl-2 homologous antagonist/killer		0.0963582	-0.135346	2	2	2	23.3	23.3	23.3	15.963	0.0016867	4.431	26994000	11	NaN	20.6674	NaN	21.2803	NaN	20.0249	NaN	20.996	NaN	20.5898	NaN		F7CUQ1	F7CUQ1_MOUSE	Bak1	Bcl-2 homologous antagonist/killer
O08738	CASP6_MOUSE	Casp6	Caspase-6		0.805255	0.149091	17	17	17	48.6	48.6	48.6	31.595	0	77.703	1558800000	244	26.2006	26.0733	26.0547	26.2516	26.0823	26.4139	26.2093	25.8882	26.2646	26.039	25.834		O08738	CASP6_MOUSE	Casp6	Caspase-6
O08749	DLDH_MOUSE	Dld	Dihydrolipoyl dehydrogenase, mitochondrial		0.10415	-0.0205378	23	23	23	53.4	53.4	53.4	54.272	0	323.31	28346000000	1516	29.5006	29.4891	29.5617	29.6593	29.6207	29.7552	29.6074	29.8801	29.6892	29.546	29.574		O08749	DLDH_MOUSE	Dld	Dihydrolipoyl dehydrogenase, mitochondrial
O08759	UBE3A_MOUSE	Ube3a	Ubiquitin-protein ligase E3A		0.152363	0.0276723	24	24	24	35.7	35.7	35.7	99.818	0	81.521	863860000	166	24.8184	25.0714	24.844	24.9349	24.9896	24.8099	24.8384	24.829	25.0606	24.7848	24.7499		O08759	UBE3A_MOUSE	Ube3a	Ubiquitin-protein ligase E3A
O08784	TCOF_MOUSE	Tcof1	Treacle protein		0	NaN	8	8	8	8.2	8.2	8.2	135	0.00029709	10.397	79852000	21	23.6298	NaN	NaN	NaN	NaN	NaN	NaN	NaN	24.9783	23.7806	24.5262		O08784	TCOF_MOUSE	Tcof1	Treacle protein
O08795	GLU2B_MOUSE	Prkcsh	Glucosidase 2 subunit beta		2.18466	0.213768	20	20	20	48.2	48.2	48.2	58.792	0	323.31	4888500000	420	26.3327	26.5077	26.4867	26.5829	26.1266	26.6352	26.4228	26.2395	26.4347	26.36	26.3863		O08795	GLU2B_MOUSE	Prkcsh	Glucosidase 2 subunit beta
O08796	EF2K_MOUSE	Eef2k	Eukaryotic elongation factor 2 kinase		0.299036	-0.0974419	19	19	19	35.9	35.9	35.9	81.738	0	64.213	858400000	190	25.7051	25.4455	25.5839	25.1265	25.3535	25.6531	25.1746	25.4644	25.2003	25.8053	25.4363		O08796	EF2K_MOUSE	Eef2k	Eukaryotic elongation factor 2 kinase
O08807	PRDX4_MOUSE	Prdx4	Peroxiredoxin-4		1.38902	-0.155598	22	21	21	66.1	66.1	66.1	31.052	0	323.31	49353000000	1884	29.5066	29.3248	29.4133	29.2939	29.6326	29.1759	29.3722	29.4074	29.276	29.5042	29.5029		O08807	PRDX4_MOUSE	Prdx4	Peroxiredoxin-4
E9PXV7	E9PXV7_MOUSE	Diaph1	Protein diaphanous homolog 1		0.0846187	-0.059562	18	18	18	16.6	16.6	16.6	139.33	0	53.091	652280000	133	25.3498	25.8333	25.1677	25.6851	26.1993	24.8917	25.5041	25.1691	25.5164	24.886	25.7351		E9PXV7	E9PXV7_MOUSE	Diaph1	Protein diaphanous homolog 1
O08810	U5S1_MOUSE	Eftud2	116 kDa U5 small nuclear ribonucleoprotein component		0.0207595	0.0103865	16	14	14	19.4	18.2	18.2	109.36	0	40.743	367560000	102	23.7351	23.7996	23.5836	23.8143	23.5425	24.2511	23.8698	23.5763	24.3328	24.1294	23.8035		O08810	U5S1_MOUSE	Eftud2	116 kDa U5 small nuclear ribonucleoprotein component
O08832	GALT4_MOUSE	Galnt4	Polypeptide N-acetylgalactosaminyltransferase 4		0.0138663	0.00660833	5	5	5	12.6	12.6	12.6	66.554	0.00030404	11.243	117070000	35	23.866	24.012	23.7609	23.5599	23.8501	24.2826	23.8243	23.6558	24.1674	24.2063	23.5424		O08832	GALT4_MOUSE	Galnt4	Polypeptide N-acetylgalactosaminyltransferase 4
O08912	GALT1_MOUSE	Galnt1	Polypeptide N-acetylgalactosaminyltransferase 1		0.048494	0.00933437	20	20	20	46.9	46.9	46.9	64.254	0	323.31	1793200000	254	25.2161	25.1443	25.3828	25.1753	25.1433	24.9972	25.2072	25.2989	25.1555	25.1831	25.0351		O08912	GALT1_MOUSE	Galnt1	Polypeptide N-acetylgalactosaminyltransferase 1
O08914	FAAH1_MOUSE	Faah	Fatty-acid amide hydrolase 1		0	NaN	5	5	5	12.1	12.1	12.1	63.221	0.0010365	6.016	27985000	9	NaN	NaN	NaN	NaN	21.5842	NaN	NaN	21.5092	NaN	21.4437	NaN		O08914	FAAH1_MOUSE	Faah	Fatty-acid amide hydrolase 1
O08915	AIP_MOUSE	Aip	AH receptor-interacting protein		0.145422	-0.0750443	9	9	9	37	37	37	37.605	0	18.548	127160000	51	22.3688	21.9005	22.3281	21.6699	21.6431	21.2595	22.0246	21.7232	21.8671	21.8467	22.0205		O08915	AIP_MOUSE	Aip	AH receptor-interacting protein
O08917	FLOT1_MOUSE	Flot1	Flotillin-1		1.58498	0.564359	8	8	8	24.1	24.1	24.1	47.513	0	13.381	159150000	33	NaN	22.8997	22.5186	22.5173	22.001	22.3868	22.6863	21.5129	NaN	22.4517	22.184		O08917	FLOT1_MOUSE	Flot1	Flotillin-1
O08919	NUMBL_MOUSE	Numbl	Numb-like protein		0	NaN	4	2	2	5.6	2	2	64.13	0.0056664	3.5054	62350000	17	NaN	NaN	NaN	NaN	NaN	NaN	NaN	NaN	NaN	NaN	NaN		O08919	NUMBL_MOUSE	Numbl	Numb-like protein
Q3TMX0	Q3TMX0_MOUSE	Sdcbp	Syntenin-1		0.435555	0.269907	10	10	10	44.3	44.3	44.3	32.251	0	102.51	1202900000	163	25.5073	25.7125	25.3969	26.151	25.8995	25.6889	25.9546	25.4466	24.4264	25.7706	26.0148		Q3TMX0	Q3TMX0_MOUSE	Sdcbp	Syntenin-1
O08997	ATOX1_MOUSE	Atox1	Copper transport protein ATOX1		0.607018	0.15057	7	7	7	88.2	88.2	88.2	7.3384	0	323.31	6867700000	571	26.4595	26.5613	26.3803	26.5911	26.1732	26.705	26.3548	26.2227	26.7966	26.2143	26.3413		O08997	ATOX1_MOUSE	Atox1	Copper transport protein ATOX1
O09005	DEGS1_MOUSE	Degs1	Sphingolipid delta(4)-desaturase DES1		0	NaN	2	2	2	10.2	10.2	10.2	38.241	0	17.704	14828000	10	NaN	NaN	NaN	NaN	NaN	NaN	NaN	NaN	NaN	NaN	NaN		O09005	DEGS1_MOUSE	Degs1	Sphingolipid delta(4)-desaturase DES1
D3Z600	D3Z600_MOUSE	Pex5	PTS1-BP		0.810699	-0.178691	6	6	6	13.8	13.8	13.8	69.836	0	44.705	64233000	22	NaN	NaN	22.4545	22.3201	22.4644	NaN	NaN	22.6782	22.5555	NaN	NaN		D3Z600	D3Z600_MOUSE	Pex5	PTS1-BP
O09044	SNP23_MOUSE	Snap23	Synaptosomal-associated protein 23		0.0982743	-0.0347825	8	8	8	50	50	50	23.261	0	26.118	243220000	89	22.3439	22.4286	22.4362	22.1383	22.4208	22.3062	22.6958	22.4749	22.8108	22.4556	22.1088		O09044	SNP23_MOUSE	Snap23	Synaptosomal-associated protein 23
O09061	PSB1_MOUSE	Psmb1	Proteasome subunit beta type-1		0.572439	0.134301	17	17	17	62.1	62.1	62.1	26.372	0	323.31	6688400000	426	26.9841	27.2117	27.1759	27.2713	27.1198	26.7381	26.9614	26.7953	26.8529	26.7621	27.1101		O09061	PSB1_MOUSE	Psmb1	Proteasome subunit beta type-1
Q8BQ10	Q8BQ10_MOUSE	Hdac2	Histone deacetylase		2.39367	0.31921	3	3	3	12.2	12.2	12.2	34.69	0.00054069	7.1338	242310000	42	23.3339	23.366	23.6524	23.359	NaN	23.6978	23.6111	23.1933	23.188	23.1327	23.2424		Q8BQ10	Q8BQ10_MOUSE	Hdac2	Histone deacetylase
O09110	MP2K3_MOUSE	Map2k3	Dual specificity mitogen-activated protein kinase kinase 3		0.254041	0.0894372	7	7	6	28.5	28.5	23.9	39.296	0	17.655	327870000	69	25.1186	25.483	25.6424	25.533	25.1799	25.0487	25.3551	25.0688	25.7016	25.5467	25.3224		O09110	MP2K3_MOUSE	Map2k3	Dual specificity mitogen-activated protein kinase kinase 3
O09111	NDUBB_MOUSE	Ndufb11	NADH dehydrogenase [ubiquinone] 1 beta subcomplex subunit 11, mitochondrial		0.584161	0.184093	8	8	8	47.7	47.7	47.7	17.444	0	28.559	583840000	67	24.7343	24.7012	25.0299	24.9103	24.8964	25.0192	24.8134	24.8375	24.0981	24.98	24.718		O09111	NDUBB_MOUSE	Ndufb11	NADH dehydrogenase [ubiquinone] 1 beta subcomplex subunit 11, mitochondrial
O09117	SYPL1_MOUSE	Sypl1	Synaptophysin-like protein 1		0.180396	-0.0687393	2	2	1	13	13	9.6	28.899	0	21.793	387130000	44	23.888	23.7284	24.0699	23.4047	24.2103	23.8761	24.0932	23.7234	NaN	23.8425	23.8518		O09117	SYPL1_MOUSE	Sypl1	Synaptophysin-like protein 1
O09131	GSTO1_MOUSE	Gsto1	Glutathione S-transferase omega-1		0.268563	-0.0732962	21	21	21	77.1	77.1	77.1	27.497	0	323.31	14071000000	863	29.6503	29.7546	29.8116	29.6332	29.5858	29.4905	29.903	29.7295	30.1828	29.8152	29.7875		O09131	GSTO1_MOUSE	Gsto1	Glutathione S-transferase omega-1
O09159	MA2B1_MOUSE	Man2b1	Lysosomal alpha-mannosidase		0.465823	-0.14638	10	10	10	11.8	11.8	11.8	114.65	0	58.897	576950000	116	25.913	25.684	25.67	25.669	26.0287	26.2305	25.9107	26.2502	25.5753	26.1736	25.9345		O09159	MA2B1_MOUSE	Man2b1	Lysosomal alpha-mannosidase
O09164	SODE_MOUSE	Sod3	Extracellular superoxide dismutase [Cu-Zn]		0.573919	0.212898	5	5	5	20.7	20.7	20.7	27.392	0.00029036	9.4966	103940000	28	23.8886	23.9829	NaN	24.1592	23.5146	23.7413	23.8114	23.6279	NaN	24.1469	23.376		O09164	SODE_MOUSE	Sod3	Extracellular superoxide dismutase [Cu-Zn]
O09165	CASQ1_MOUSE	Casq1	Calsequestrin-1		0.189421	0.150939	5	5	5	18	18	18	46.377	0	35.194	103280000	31	NaN	23.1908	22.4715	22.8895	NaN	NaN	NaN	22.8685	NaN	22.5309	NaN		O09165	CASQ1_MOUSE	Casq1	Calsequestrin-1
Q9CQM8	Q9CQM8_MOUSE	Rpl21	60S ribosomal protein L21		0.057318	-0.0175131	9	9	9	43.8	43.8	43.8	18.579	0	323.31	21462000000	741	30.7791	30.5372	30.5231	30.4736	30.4071	30.7922	30.8406	30.6718	30.6428	30.9225	30.4818		Q9CQM8	Q9CQM8_MOUSE	Rpl21	60S ribosomal protein L21
O09172	GSH0_MOUSE	Gclm	Glutamate--cysteine ligase regulatory subunit		0.281875	0.0764296	11	11	11	40.5	40.5	40.5	30.534	0	96.35	1455400000	215	27.3186	27.7263	27.5438	27.6847	27.5874	27.3851	27.4137	27.4762	27.2631	27.8406	27.3597		O09172	GSH0_MOUSE	Gclm	Glutamate--cysteine ligase regulatory subunit
O09174	AMACR_MOUSE	Amacr	Alpha-methylacyl-CoA racemase		0.717431	-0.179476	4	4	4	15.2	15.2	15.2	41.704	0.00053981	7.0751	88655000	27	22.4448	21.8506	22.1922	22.2732	22.3296	22.4956	22.1948	22.2787	NaN	22.4698	NaN		O09174	AMACR_MOUSE	Amacr	Alpha-methylacyl-CoA racemase
E9Q9B0	E9Q9B0_MOUSE	Kif1c	Kinesin-like protein KIF1C		0	0.392757	6	5	4	5.5	4.7	3.7	123.76	0.0015072	5.2923	71775000	16	21.8505	NaN	NaN	22.2432	NaN	NaN	NaN	NaN	NaN	NaN	NaN		E9Q9B0	E9Q9B0_MOUSE	Kif1c	Kinesin-like protein KIF1C
O35075	VP26C_MOUSE	Vps26c	Vacuolar protein sorting-associated protein 26C		1.12198	0.160581	7	7	7	34	34	34	32.97	0	39.209	220870000	56	23.178	23.3468	23.4709	23.1477	23.0406	23.3525	23.2659	23.1684	23.2782	22.9486	23.3231		O35075	VP26C_MOUSE	Vps26c	Vacuolar protein sorting-associated protein 26C
A0A0R4J263	A0A0R4J263_MOUSE	Agpat1	1-acyl-sn-glycerol-3-phosphate acyltransferase		1.91633	-0.267033	10	10	10	54.7	54.7	54.7	31.737	0	198.79	2535100000	383	26.9258	26.7246	26.5116	26.5997	26.6513	26.3574	26.6235	26.9394	26.9711	26.8367	26.658		A0A0R4J263	A0A0R4J263_MOUSE	Agpat1	1-acyl-sn-glycerol-3-phosphate acyltransferase
O35114	SCRB2_MOUSE	Scarb2	Lysosome membrane protein 2		1.02711	0.180119	12	12	12	29.3	29.3	29.3	54.043	0	56.397	855570000	148	25.2941	25.3307	25.4301	25.3789	25.3152	25.2296	25.7194	25.0078	25.2669	25.156	25.3858		O35114	SCRB2_MOUSE	Scarb2	Lysosome membrane protein 2
O35127	C10_MOUSE	Grcc10	Protein C10		0.0530531	0.0169568	5	5	5	63.5	63.5	63.5	13.194	0	27.371	122220000	40	22.4975	22.5908	22.4349	22.4595	22.3301	22.4074	NaN	22.2574	22.8001	NaN	22.3958		O35127	C10_MOUSE	Grcc10	Protein C10
O35129	PHB2_MOUSE	Phb2	Prohibitin-2		0.193504	-0.0509496	18	18	18	64.9	64.9	64.9	33.296	0	323.31	7469300000	604	27.3361	27.1297	27.5056	27.263	27.318	27.5774	27.4265	27.6296	27.4829	27.6044	27.2173		O35129	PHB2_MOUSE	Phb2	Prohibitin-2
E9PV44	E9PV44_MOUSE	Atpif1	ATP synthase F1 subunit epsilon		0	NaN	3	3	3	36.5	36.5	36.5	8.7887	0.0074431	3.0829	290560000	40	24.1709	NaN	NaN	NaN	NaN	NaN	NaN	NaN	NaN	24.4527	24.0963		E9PV44	E9PV44_MOUSE	Atpif1	ATP synthase F1 subunit epsilon
A0A1B0GT05	A0A1B0GT05_MOUSE	Gm45785	Predicted gene 45785		0.38941	-0.133435	3	3	3	33	33	33	10.446	0.00029189	9.652	169670000	35	22.8712	23.0388	22.7059	23.145	23.1304	22.2692	22.7909	23.074	22.9032	22.7335	22.8281		A0A1B0GT05	A0A1B0GT05_MOUSE	Gm45785	Predicted gene 45785
A2A9I0	A2A9I0_MOUSE	Gosr2	Golgi SNAP receptor complex member 2		0.239394	0.0846104	8	8	8	46.1	46.1	46.1	19.571	0	30.45	1280500000	100	25.9069	26.2487	26.4925	25.919	25.8633	25.6591	25.7895	26.0811	26.0527	25.8368	25.8821		A2A9I0	A2A9I0_MOUSE	Gosr2	Golgi SNAP receptor complex member 2
A2AJY7	A2AJY7_MOUSE	Col15a1	Collagen alpha-1(XV) chain		0.290601	-0.103074	10	10	10	42.8	42.8	42.8	30.569	0	47.596	398210000	80	24.6549	24.8939	24.8481	25.1044	25.3079	24.9599	24.9464	24.9817	25.5552	24.9369	24.885		A2AJY7	A2AJY7_MOUSE	Col15a1	Collagen alpha-1(XV) chain
O35215	DOPD_MOUSE	Ddt	D-dopachrome decarboxylase		0.270791	0.0591176	12	4	4	99.2	37.3	37.3	13.077	0	214.74	4640700000	181	27.7452	27.5196	27.7364	27.5973	27.2032	27.5098	27.5914	27.6115	27.4915	27.4987	27.6406		O35215	DOPD_MOUSE	Ddt	D-dopachrome decarboxylase
O35226	PSMD4_MOUSE	Psmd4	26S proteasome non-ATPase regulatory subunit 4		0.0203297	0.00408262	14	14	13	44.7	44.7	41.5	40.703	0	323.31	3320600000	376	26.5643	26.6894	26.4903	26.3004	26.4142	26.5799	26.471	26.3974	26.606	26.5391	26.4916		O35226	PSMD4_MOUSE	Psmd4	26S proteasome non-ATPase regulatory subunit 4
O35239	PTN9_MOUSE	Ptpn9	Tyrosine-protein phosphatase non-receptor type 9		0.0273872	-0.00974541	8	8	8	14.3	14.3	14.3	67.969	0	16.782	121020000	54	23.2157	22.9342	23.1326	23.0228	23.3151	22.8697	23.4995	23.1391	23.1054	22.9122	22.9216		O35239	PTN9_MOUSE	Ptpn9	Tyrosine-protein phosphatase non-receptor type 9
A2AAN0	A2AAN0_MOUSE	Exoc7	Exocyst complex component 7		0.435792	-0.192909	9	9	9	15.9	15.9	15.9	78.505	0	12.364	96601000	22	NaN	NaN	23.5922	23.4731	24.0924	NaN	23.632	23.7578	23.9842	23.2478	23.7111		A2AAN0	A2AAN0_MOUSE	Exoc7	Exocyst complex component 7
O35286	DHX15_MOUSE	Dhx15	Pre-mRNA-splicing factor ATP-dependent RNA helicase DHX15		0.699393	0.100434	30	30	29	42	42	40.9	91.006	0	93.953	2429700000	458	25.6703	25.8673	25.6357	25.8635	25.6212	25.9273	25.7905	25.5727	25.8246	25.9041	25.7058		O35286	DHX15_MOUSE	Dhx15	Pre-mRNA-splicing factor ATP-dependent RNA helicase DHX15
O35295	PURB_MOUSE	Purb	Transcriptional activator protein Pur-beta		0.59179	-0.132036	12	11	11	48.1	46	46	33.901	0	323.31	1137600000	215	25.2245	24.667	25.1994	24.7293	24.797	24.9616	24.9898	24.9994	25.1456	25.0256	25.0566		O35295	PURB_MOUSE	Purb	Transcriptional activator protein Pur-beta
O35309	NMI_MOUSE	Nmi	N-myc-interactor		0.0205106	-0.00473347	19	19	19	58	58	58	35.235	0	74.365	892950000	176	24.8611	24.7736	24.8763	24.6975	24.9965	24.8235	25.1118	24.6972	24.8354	24.9569	24.8206		O35309	NMI_MOUSE	Nmi	N-myc-interactor
O35326	SRSF5_MOUSE	Srsf5	Serine/arginine-rich splicing factor 5		0.0233419	0.0132835	6	5	5	22.7	19.3	19.3	30.891	0.00030358	11.155	491090000	51	24.118	23.9793	23.6426	24.2081	23.6371	24.6806	23.9961	24.3198	24.3557	24.1814	23.9164		O35326	SRSF5_MOUSE	Srsf5	Serine/arginine-rich splicing factor 5
A0A0B4J1E7	A0A0B4J1E7_MOUSE	Kpna4	Importin subunit alpha-3		0.805752	0.267427	13	13	8	34.3	34.3	24.9	68.03	0	85.094	1064200000	144	26.938	27.5098	27.1858	27.2347	27.1064	26.9489	27.0127	26.6792	26.3733	27.115	27.2539		A0A0B4J1E7	A0A0B4J1E7_MOUSE	Kpna4	Importin subunit alpha-3
O35344	IMA4_MOUSE	Kpna3	Importin subunit alpha-4		0.0737059	0.0216695	12	7	7	30.1	18.8	18.8	57.772	0	45.689	269720000	62	24.5091	24.8658	24.3918	24.6654	24.6317	24.2125	24.6581	24.5605	24.4546	24.5233	24.543		O35344	IMA4_MOUSE	Kpna3	Importin subunit alpha-4
O35345	IMA7_MOUSE	Kpna6	Importin subunit alpha-7		0.144539	0.0360205	16	16	10	38.4	38.4	26.3	59.964	0	111.47	670160000	161	25.9439	25.8982	25.8432	25.948	26.1459	25.9693	25.7994	25.9238	25.5397	25.7566	25.8235		O35345	IMA7_MOUSE	Kpna6	Importin subunit alpha-7
A0A494BBB0	A0A494BBB0_MOUSE	Capn1	Calcium-activated neutral proteinase 1 (Fragment)		0.100255	0.018048	20	20	20	32.5	32.5	32.5	80.362	0	84.963	1201800000	241	25.7713	25.9267	25.6565	25.8391	25.6736	25.8477	25.9881	25.8943	25.8243	25.915	25.9228		A0A494BBB0	A0A494BBB0_MOUSE	Capn1	Calcium-activated neutral proteinase 1 (Fragment)
O35381	AN32A_MOUSE	Anp32a	Acidic leucine-rich nuclear phosphoprotein 32 family member A		0.502929	0.125264	16	16	13	38.9	38.9	35.6	28.537	0	314.68	4113500000	340	25.9873	26.1862	26.1386	26.2928	25.9817	26.3373	26.1209	26.4126	25.7151	26.1998	26.2427		O35381	AN32A_MOUSE	Anp32a	Acidic leucine-rich nuclear phosphoprotein 32 family member A
O35382	EXOC4_MOUSE	Exoc4	Exocyst complex component 4		1.01875	0.20192	18	18	18	24.4	24.4	24.4	110.54	0	29.562	630690000	113	25.2584	25.4581	25.8193	25.751	25.6828	25.912	25.5138	25.3483	25.4627	25.6278	25.5535		O35382	EXOC4_MOUSE	Exoc4	Exocyst complex component 4
A0A0G2JDP0	A0A0G2JDP0_MOUSE	Hax1	HCLS1-associated protein X-1		0.166015	0.108501	6	6	6	29.2	29.2	29.2	31.315	0.00029291	9.7585	139660000	31	24.3551	24.5949	24.3272	24.5906	24.2133	25.3574	NaN	24.5975	24.5573	25.2677	24.6632		A0A0G2JDP0	A0A0G2JDP0_MOUSE	Hax1	HCLS1-associated protein X-1
O35405	PLD3_MOUSE	Pld3	5-3 exonuclease PLD3		0.90584	0.241011	7	7	7	23.4	23.4	23.4	54.388	0	93.245	345200000	72	24.1304	24.0056	24.4439	24.1929	24.057	24.3167	24.3417	23.6501	24.1084	23.7555	24.4136		O35405	PLD3_MOUSE	Pld3	5-3 exonuclease PLD3
O35435	PYRD_MOUSE	Dhodh	Dihydroorotate dehydrogenase (quinone), mitochondrial		0.144373	0.068921	15	15	15	56.5	56.5	56.5	42.699	0	54.387	566620000	128	25.2995	25.2325	25.4403	25.2453	25.097	25.8912	25.1913	25.324	25.3534	25.9083	25.0049		O35435	PYRD_MOUSE	Dhodh	Dihydroorotate dehydrogenase (quinone), mitochondrial
O35445	RNF5_MOUSE	Rnf5	E3 ubiquitin-protein ligase RNF5		0	NaN	2	2	2	17.2	17.2	17.2	19.837	0.0072735	3.1707	79808000	4	NaN	NaN	NaN	NaN	NaN	NaN	NaN	NaN	NaN	NaN	NaN		O35445	RNF5_MOUSE	Rnf5	E3 ubiquitin-protein ligase RNF5
E9Q0T0	E9Q0T0_MOUSE	Ppt2	Lysosomal thioesterase PPT2 (Fragment)		0	-0.624529	3	3	3	15.3	15.3	15.3	23.143	0.0015259	5.5193	25248000	15	NaN	NaN	NaN	NaN	NaN	NaN	23.5295	NaN	NaN	24.154	NaN		E9Q0T0	E9Q0T0_MOUSE	Ppt2	Lysosomal thioesterase PPT2 (Fragment)
O35459	ECH1_MOUSE	Ech1	Delta(3,5)-Delta(2,4)-dienoyl-CoA isomerase, mitochondrial		0.132341	0.0489613	11	11	11	39.1	39.1	39.1	36.118	0	96.816	687210000	98	23.7427	23.8842	24.2307	24.0419	24.04	24.3798	23.9982	23.9036	24.1807	24.4964	23.9845		O35459	ECH1_MOUSE	Ech1	Delta(3,5)-Delta(2,4)-dienoyl-CoA isomerase, mitochondrial
O35465	FKBP8_MOUSE	Fkbp8	Peptidyl-prolyl cis-trans isomerase FKBP8		1.2138	-0.332596	5	5	5	22.4	22.4	22.4	43.528	0	25.542	78985000	31	NaN	21.7906	21.7773	21.9342	22.0805	21.7777	NaN	NaN	22.5453	22.0984	21.886		O35465	FKBP8_MOUSE	Fkbp8	Peptidyl-prolyl cis-trans isomerase FKBP8
O35492	CLK3_MOUSE	Clk3	Dual specificity protein kinase CLK3		0	0.624538	2	2	2	6	6	6	73.797	0	13.755	119300000	16	24.6964	NaN	NaN	25.2908	25.1205	NaN	NaN	NaN	24.1821	NaN	NaN		O35492	CLK3_MOUSE	Clk3	Dual specificity protein kinase CLK3
O35593	PSDE_MOUSE	Psmd14	26S proteasome non-ATPase regulatory subunit 14		0.323428	0.0554246	13	13	13	79.4	79.4	79.4	34.577	0	183.25	2746100000	286	26.8804	27.0562	27.2066	27.0444	27.1648	27.1056	27.0707	26.8567	27.0404	27.0567	27.2485		O35593	PSDE_MOUSE	Psmd14	26S proteasome non-ATPase regulatory subunit 14
O35598	ADA10_MOUSE	Adam10	Disintegrin and metalloproteinase domain-containing protein 10		0.641613	-0.258269	6	6	6	13.4	13.4	13.4	83.967	0	61.95	167790000	26	22.1791	22.5349	22.2929	22.2341	NaN	21.9837	22.6868	22.8582	NaN	22.8258	22.5557		O35598	ADA10_MOUSE	Adam10	Disintegrin and metalloproteinase domain-containing protein 10
O35604	NPC1_MOUSE	Npc1	NPC intracellular cholesterol transporter 1		0	-0.432314	2	2	2	1.9	1.9	1.9	142.88	0.0023941	4.3359	24302000	11	NaN	NaN	NaN	NaN	NaN	22.8163	NaN	NaN	NaN	NaN	23.2486		O35604	NPC1_MOUSE	Npc1	NPC intracellular cholesterol transporter 1
E9Q855	E9Q855_MOUSE	Scamp3	Secretory carrier-associated membrane protein		0.253198	0.0637468	7	7	7	22.2	22.2	22.2	34.515	0	186.36	544620000	85	23.6576	23.5437	23.4095	23.4964	23.3181	23.3461	23.6385	23.2315	23.1944	23.4675	23.6695		E9Q855	E9Q855_MOUSE	Scamp3	Secretory carrier-associated membrane protein
Q91W01	Q91W01_MOUSE	Pmm1	Phosphomannomutase		0	NaN	5	3	3	26.2	17.3	17.3	23.103	0.002619	4.2434	9207200	5	NaN	NaN	NaN	NaN	NaN	NaN	NaN	NaN	NaN	NaN	NaN		Q91W01	Q91W01_MOUSE	Pmm1	Phosphomannomutase
O35623	BET1_MOUSE	Bet1	BET1 homolog		0.264256	-0.159326	3	3	3	28	28	28	13.274	0	113.68	353150000	33	24.35	24.0848	24.2782	24.3839	23.934	NaN	23.3188	24.5269	24.219	24.3677	23.6569		O35623	BET1_MOUSE	Bet1	BET1 homolog
O35639	ANXA3_MOUSE	Anxa3	Annexin A3		1.19692	0.169437	28	28	28	78.3	78.3	78.3	36.384	0	97.987	2469900000	381	25.7366	25.9881	25.8841	25.9462	25.6266	25.9785	25.8877	25.5797	26.0272	25.9158	25.7189		O35639	ANXA3_MOUSE	Anxa3	Annexin A3
Q5SVG5	Q5SVG5_MOUSE	Ap1b1	AP complex subunit beta		0.0481351	-0.00808722	61	61	34	68.1	68.1	46.8	101.19	0	323.31	13977000000	1633	27.5248	27.45	27.6771	27.459	27.5496	27.3118	27.4568	27.4613	27.392	27.4307	27.5158		Q5SVG5	Q5SVG5_MOUSE	Ap1b1	AP complex subunit beta
O35657	NEUR1_MOUSE	Neu1	Sialidase-1		0	0.303757	4	4	4	12.2	12.2	12.2	44.591	0.001533	5.5991	117130000	18	NaN	23.3846	23.8926	23.4798	NaN	NaN	24.0488	NaN	NaN	NaN	23.3977		O35657	NEUR1_MOUSE	Neu1	Sialidase-1
O35664	INAR2_MOUSE	Ifnar2	Interferon alpha/beta receptor 2		0	NaN	1	1	1	1.9	1.9	1.9	56.578	0.0094909	2.8751	15211000	7	NaN	NaN	NaN	NaN	NaN	NaN	NaN	NaN	NaN	NaN	NaN		O35664	INAR2_MOUSE	Ifnar2	Interferon alpha/beta receptor 2
O35678	MGLL_MOUSE	Mgll	Monoglyceride lipase		1.03804	-0.16281	19	19	19	69.6	69.6	69.6	33.387	0	272.32	5140400000	526	27.3389	27.2173	27.0537	27.1368	27.4629	26.9931	27.2246	27.1549	27.217	27.0705	27.4834		O35678	MGLL_MOUSE	Mgll	Monoglyceride lipase
O35682	MYADM_MOUSE	Myadm	Myeloid-associated differentiation marker		0	NaN	2	2	2	10.3	10.3	10.3	35.284	0	29.369	112810000	15	NaN	NaN	NaN	NaN	NaN	NaN	NaN	NaN	NaN	NaN	NaN		O35682	MYADM_MOUSE	Myadm	Myeloid-associated differentiation marker
O35683	NDUA1_MOUSE	Ndufa1	NADH dehydrogenase [ubiquinone] 1 alpha subcomplex subunit 1		0	NaN	1	1	1	14.3	14.3	14.3	8.1384	0.0098438	2.7685	105650000	26	NaN	NaN	NaN	NaN	NaN	NaN	NaN	NaN	NaN	NaN	NaN		O35683	NDUA1_MOUSE	Ndufa1	NADH dehydrogenase [ubiquinone] 1 alpha subcomplex subunit 1
O35685	NUDC_MOUSE	Nudc	Nuclear migration protein nudC		0.425646	-0.099682	11	11	11	36.7	36.7	36.7	38.358	0	36.582	1034700000	130	25.5422	25.8401	25.6027	25.5415	25.7743	25.4984	25.7742	25.8756	25.5242	26.035	25.7551		O35685	NUDC_MOUSE	Nudc	Nuclear migration protein nudC
O35704	SPTC1_MOUSE	Sptlc1	Serine palmitoyltransferase 1		0.151467	0.0471664	9	9	9	29	29	29	52.534	0	38.13	276580000	86	23.4048	23.341	23.5948	23.5621	23.2033	23.2871	23.8869	23.5533	23.5225	23.6621	23.5772		O35704	SPTC1_MOUSE	Sptlc1	Serine palmitoyltransferase 1
O35737	HNRH1_MOUSE	Hnrnph1	Heterogeneous nuclear ribonucleoprotein H		0.0645933	-0.0144742	13	11	7	43.4	37.4	22.9	49.199	0	323.31	4239200000	401	26.1763	26.244	26.2344	26.0803	26.0746	26.282	26.4785	26.3399	26.3518	26.404	26.3232		O35737	HNRH1_MOUSE	Hnrnph1	Heterogeneous nuclear ribonucleoprotein H
O35744	CHIL3_MOUSE	Chil3	Chitinase-like protein 3		0.295743	0.54227	16	16	12	42.5	42.5	31.2	44.458	0	79.257	1485900000	240	26.7501	28.0161	25.9629	26.0528	26.7309	25.18	28.7493	25.2747	25.5218	25.257	27.9653		O35744	CHIL3_MOUSE	Chil3	Chitinase-like protein 3
O35841	API5_MOUSE	Api5	Apoptosis inhibitor 5		0.193759	0.03665	16	16	16	44.2	44.2	44.2	56.784	0	172.78	1192400000	185	25.1877	25.4016	25.1849	25.2557	25.2586	25.0303	25.3454	25.2607	25.0097	25.3148	25.2101		O35841	API5_MOUSE	Api5	Apoptosis inhibitor 5
O35855	BCAT2_MOUSE	Bcat2	Branched-chain-amino-acid aminotransferase, mitochondrial		0.0460368	-0.0132583	17	17	17	48.3	48.3	48.3	44.127	0	323.31	15329000000	928	29.719	29.7457	30.0212	29.81	29.8728	30.1404	29.941	30.0186	29.9974	30.2246	29.8371		O35855	BCAT2_MOUSE	Bcat2	Branched-chain-amino-acid aminotransferase, mitochondrial
O35857	TIM44_MOUSE	Timm44	Mitochondrial import inner membrane translocase subunit TIM44		0.33643	0.0891192	20	20	20	39.8	39.8	39.8	51.091	0	48.529	1111900000	213	25.8387	25.7442	25.9308	25.9043	25.8759	26.4344	25.9415	25.9925	25.8825	26.0594	25.7626		O35857	TIM44_MOUSE	Timm44	Mitochondrial import inner membrane translocase subunit TIM44
O35864	CSN5_MOUSE	Cops5	COP9 signalosome complex subunit 5		0.111055	-0.026844	13	13	13	44.6	44.6	44.6	37.548	0	95.087	1754000000	254	26.3086	26.6041	26.1106	26.3678	26.3233	26.4181	26.2291	26.2807	26.3884	26.5859	26.3499		O35864	CSN5_MOUSE	Cops5	COP9 signalosome complex subunit 5
O35874	SATT_MOUSE	Slc1a4	Neutral amino acid transporter A		1.13711	0.410877	4	4	4	12.8	12.8	12.8	56.061	0	77.678	110740000	45	21.6443	22.0815	22.4081	22.0964	21.6322	22.4099	22.4389	22.5975	21.9768	21.9946	21.4111		O35874	SATT_MOUSE	Slc1a4	Neutral amino acid transporter A
O35887	CALU_MOUSE	Calu	Calumenin		0.165914	0.018548	24	24	5	65.1	65.1	12.7	37.063	0	323.31	7269600000	703	26.8175	26.9157	26.8159	26.8538	26.7709	26.682	26.7424	26.8391	26.7754	26.8065	26.6911		O35887	CALU_MOUSE	Calu	Calumenin
O35901	O35901_MOUSE	Lsm2	G7b alternative form		0.392982	-0.206073	5	5	5	49.6	49.6	49.6	14.857	0	18.913	165130000	52	22.6451	22.6514	22.3006	22.06	23.2536	22.2771	22.8937	22.1288	23.0342	22.3237	22.4703		O35901	O35901_MOUSE	Lsm2	G7b alternative form
O35943	FRDA_MOUSE	Fxn	Frataxin, mitochondrial		0.986321	0.20673	3	3	3	19.3	19.3	19.3	22.924	0.00030432	11.31	175550000	32	23.9965	24.2025	24.4762	24.5847	24.5287	24.3677	24.2523	24.0759	23.9593	24.2488	24.2107		O35943	FRDA_MOUSE	Fxn	Frataxin, mitochondrial
O35945	AL1A7_MOUSE	Aldh1a7	Aldehyde dehydrogenase, cytosolic 1		1.77253	-0.429891	23	21	15	61.9	60.1	43.9	54.587	0	323.31	2160800000	306	25.6754	25.6847	25.6026	25.5341	26.1844	25.7495	25.9518	25.9276	26.227	26.509	26.2833		O35945	AL1A7_MOUSE	Aldh1a7	Aldehyde dehydrogenase, cytosolic 1
O35955	PSB10_MOUSE	Psmb10	Proteasome subunit beta type-10		0.154262	-0.126707	4	4	4	17.9	17.9	17.9	29.063	0.00053836	7.0164	141600000	31	23.5805	22.9294	22.1778	23.0818	22.6804	22.9256	23.6711	23.114	23.6217	23.2302	22.2763		O35955	PSB10_MOUSE	Psmb10	Proteasome subunit beta type-10
A0A1B0GSZ9	A0A1B0GSZ9_MOUSE	Mrpl23	39S ribosomal protein L23, mitochondrial		1.09039	-0.202813	4	4	4	33.1	33.1	33.1	20.059	0	26.378	57701000	17	NaN	NaN	NaN	NaN	NaN	22.4959	22.4811	22.7525	NaN	22.6302	NaN		A0A1B0GSZ9	A0A1B0GSZ9_MOUSE	Mrpl23	39S ribosomal protein L23, mitochondrial
O35988	SDC4_MOUSE	Sdc4	Syndecan-4		0.273708	0.148088	2	2	2	12.1	12.1	12.1	21.482	0.00053333	6.7805	128420000	40	23.178	23.0822	NaN	NaN	23.4715	22.9161	23.4109	23.0377	22.7207	22.4977	23.0243		O35988	SDC4_MOUSE	Sdc4	Syndecan-4
O54692	ZW10_MOUSE	Zw10	Centromere/kinetochore protein zw10 homolog		0.740186	0.170746	15	15	15	25.3	25.3	25.3	88.062	0	88.351	6733000000	101	28.5921	28.613	28.8712	28.8352	28.849	28.7429	28.6306	28.5883	28.7325	28.1493	28.4958		O54692	ZW10_MOUSE	Zw10	Centromere/kinetochore protein zw10 homolog
O54724	CAVN1_MOUSE	Cavin1	Caveolae-associated protein 1		0.899027	-0.116524	22	22	22	53.1	53.1	53.1	43.953	0	323.31	13728000000	1191	27.8805	27.5988	27.6022	27.8167	27.7046	27.5755	27.5923	27.6054	27.9144	27.653	27.7638		O54724	CAVN1_MOUSE	Cavin1	Caveolae-associated protein 1
O54734	OST48_MOUSE	Ddost	Dolichyl-diphosphooligosaccharide--protein glycosyltransferase 48 kDa subunit		0.477965	-0.0699096	18	18	18	61.9	61.9	61.9	49.027	0	323.31	12780000000	1216	29.1029	29.0162	29.04	28.8695	29.0626	28.7495	29.0639	28.9371	28.8701	29.0639	29.0695		O54734	OST48_MOUSE	Ddost	Dolichyl-diphosphooligosaccharide--protein glycosyltransferase 48 kDa subunit
O54774	AP3D1_MOUSE	Ap3d1	AP-3 complex subunit delta-1		0.517505	-0.0757084	48	48	48	43	43	43	135.08	0	323.31	3617700000	721	25.6912	25.8352	25.6491	25.4778	25.8781	25.6221	25.6468	25.6562	25.7961	25.7235	25.5862		O54774	AP3D1_MOUSE	Ap3d1	AP-3 complex subunit delta-1
O54786	DFFA_MOUSE	Dffa	DNA fragmentation factor subunit alpha		0.651251	-0.351848	5	5	5	17.8	17.8	17.8	36.572	0.00028337	8.6779	130630000	37	22.1168	22.5139	21.7112	22.0772	22.2817	20.86	21.8396	22.3891	22.3149	22.0972	21.7137		O54786	DFFA_MOUSE	Dffa	DNA fragmentation factor subunit alpha
O54804	CHKA_MOUSE	Chka	Choline kinase alpha		1.59444	0.540463	6	6	6	11.7	11.7	11.7	51.984	0.00030414	11.251	92683000	26	23.2046	23.7319	23.875	23.7201	23.399	23.9222	NaN	22.8124	NaN	23.1362	23.8072		O54804	CHKA_MOUSE	Chka	Choline kinase alpha
Q3V2G6	Q3V2G6_MOUSE	Tpd52l1	Tumor protein D53		0.138632	-0.0506777	6	6	6	65.6	65.6	65.6	14.752	0	56.256	439220000	166	23.3344	23.6344	23.4789	23.1404	23.6439	23.149	23.3026	23.2544	23.7505	23.1833	23.184		Q3V2G6	Q3V2G6_MOUSE	Tpd52l1	Tumor protein D53
O54825	BYST_MOUSE	Bysl	Bystin		0.414061	-0.306773	4	4	4	10.8	10.8	10.8	49.783	0.00053923	7.0563	57401000	24	23.3625	22.9628	NaN	23.2727	23.3649	23.2595	NaN	22.9245	24.5259	23.3258	23.327		O54825	BYST_MOUSE	Bysl	Bystin
O54833	CSK22_MOUSE	Csnk2a2	Casein kinase II subunit alpha		0.080989	0.0466058	11	11	11	39.4	39.4	39.4	41.215	0	31.468	468880000	74	24.5348	24.7058	24.1991	24.8494	25.1096	24.4228	24.5054	24.3768	23.864	24.3823	24.672		O54833	CSK22_MOUSE	Csnk2a2	Casein kinase II subunit alpha
Q80YP4	Q80YP4_MOUSE	Gucy1b1	Guanylate cyclase		0	NaN	3	3	3	6.1	6.1	6.1	68.994	0.0014588	4.6481	38331000	13	NaN	NaN	NaN	NaN	23.0209	NaN	NaN	23.8587	NaN	NaN	NaN		Q80YP4	Q80YP4_MOUSE	Gucy1b1	Guanylate cyclase
A2AP78	A2AP78_MOUSE	Hmgb3	High mobility group protein B3 (Fragment)		0.5397	0.271756	4	4	4	34.6	34.6	34.6	18.311	0.00029403	9.9171	349880000	53	23.7573	23.9793	NaN	24.6574	23.8486	24.6324	24.5124	23.8958	24.3275	24.7507	24.4618		A2AP78	A2AP78_MOUSE	Hmgb3	High mobility group protein B3 (Fragment)
D3Z2E3	D3Z2E3_MOUSE	Reps1	RalBP1-associated Eps domain-containing protein 1		0.896875	0.268137	4	4	3	7	7	5.5	76.826	0	32.443	101890000	24	22.1934	22.3963	22.1722	22.2965	21.5635	22.2323	22.4728	22.2524	NaN	22.1742	NaN		D3Z2E3	D3Z2E3_MOUSE	Reps1	RalBP1-associated Eps domain-containing protein 1
O54950	AAKG1_MOUSE	Prkag1	5-AMP-activated protein kinase subunit gamma-1		1.13396	0.143873	18	18	18	76.4	76.4	76.4	37.52	0	79.22	1316700000	225	25.123	25.436	25.4444	25.0421	25.1231	25.2116	25.3341	25.1643	25.1442	25.1149	25.2292		O54950	AAKG1_MOUSE	Prkag1	5-AMP-activated protein kinase subunit gamma-1
O54962	BAF_MOUSE	Banf1	Barrier-to-autointegration factor		0	NaN	2	2	2	42.7	42.7	42.7	10.102	0.0060852	3.4271	12957000	5	NaN	NaN	NaN	NaN	NaN	NaN	NaN	NaN	NaN	NaN	NaN		O54962	BAF_MOUSE	Banf1	Barrier-to-autointegration factor
O54984	GET3_MOUSE	Get3	ATPase GET3		0.284262	-0.0841876	12	12	12	42.8	42.8	42.8	38.822	0	55.158	1781700000	225	25.9451	26.0563	26.0739	25.9502	26.3663	26.2376	26.3696	25.9522	26.3417	26.5267	26.1983		O54984	GET3_MOUSE	Get3	ATPase GET3
O54988	SLK_MOUSE	Slk	STE20-like serine/threonine-protein kinase		0.667763	0.174162	19	19	19	17.4	17.4	17.4	141.46	0	50.865	361460000	107	24.681	24.7315	24.5188	24.7442	24.4167	24.8783	24.8773	24.2982	24.9246	24.3475	24.7869		O54988	SLK_MOUSE	Slk	STE20-like serine/threonine-protein kinase
O55013	TPPC3_MOUSE	Trappc3	Trafficking protein particle complex subunit 3		0.533125	0.0824299	7	7	7	48.9	48.9	48.9	20.302	0	87.82	1140400000	134	24.5443	24.6283	24.4769	24.6127	24.4032	24.4759	24.5333	24.4875	24.2179	24.4578	24.6673		O55013	TPPC3_MOUSE	Trappc3	Trafficking protein particle complex subunit 3
O55022	PGRC1_MOUSE	Pgrmc1	Membrane-associated progesterone receptor component 1		0.655229	-0.239642	10	10	9	57.9	57.9	53.3	21.694	0	49.251	1408900000	136	25.3043	25.16	24.5306	25.1997	25.0275	25.2857	25.4731	25.2834	25.6059	25.7115	25.2842		O55022	PGRC1_MOUSE	Pgrmc1	Membrane-associated progesterone receptor component 1
O55026	ENTP2_MOUSE	Entpd2	Ectonucleoside triphosphate diphosphohydrolase 2		0.624114	0.259246	6	6	6	14.9	14.9	14.9	54.319	0	12.331	196220000	66	24.4315	24.3654	24.2238	24.0398	23.6208	24.228	24.7073	23.6865	24.3392	24.4587	23.785		O55026	ENTP2_MOUSE	Entpd2	Ectonucleoside triphosphate diphosphohydrolase 2
O55028	BCKD_MOUSE	Bckdk	[3-methyl-2-oxobutanoate dehydrogenase [lipoamide]] kinase, mitochondrial		0.538928	-0.163832	8	8	8	35.4	35.4	35.4	46.587	0	37.648	321450000	46	25.3671	25.8642	25.4937	25.5428	25.9743	25.2985	25.5882	25.9504	25.6535	NaN	25.6613		O55028	BCKD_MOUSE	Bckdk	[3-methyl-2-oxobutanoate dehydrogenase [lipoamide]] kinase, mitochondrial
O55029	COPB2_MOUSE	Copb2	Coatomer subunit beta		0.44118	0.0552649	63	63	63	80.6	80.6	80.6	102.45	0	323.31	31219000000	2176	27.8046	27.7755	27.8882	27.7648	27.6544	27.6433	27.6751	27.7358	27.5461	27.6557	27.768		O55029	COPB2_MOUSE	Copb2	Coatomer subunit beta
O55042	SYUA_MOUSE	Snca	Alpha-synuclein		0	-0.271221	1	1	1	9.3	9.3	9.3	14.485	0	32.3	72154000	16	22.3193	NaN	NaN	NaN	NaN	NaN	22.0668	22.1689	22.2098	NaN	22.6539		O55042	SYUA_MOUSE	Snca	Alpha-synuclein
A0A0R4J018	A0A0R4J018_MOUSE	Tpmt	Thiopurine S-methyltransferase		0.233821	0.216225	5	5	5	23.8	23.8	23.8	27.571	0.00104	6.1174	59711000	18	NaN	23.3354	NaN	23.7784	23.8801	24.7748	NaN	23.6482	23.8937	NaN	23.5645		A0A0R4J018	A0A0R4J018_MOUSE	Tpmt	Thiopurine S-methyltransferase
O55100	SNG1_MOUSE	Syngr1	Synaptogyrin-1		0.973602	-0.462005	2	2	2	10.3	10.3	10.3	25.652	0.00030285	11.102	271330000	48	24.0024	22.4865	23.4805	23.7232	23.8968	23.7005	22.8586	23.1981	23.7883	23.5897	23.796		O55100	SNG1_MOUSE	Syngr1	Synaptogyrin-1
H3BJY1	H3BJY1_MOUSE	Syngr2	Synaptogyrin-2		0	NaN	1	1	1	41.3	41.3	41.3	4.6893	0.00029994	10.704	30633000	7	NaN	NaN	NaN	NaN	NaN	NaN	NaN	NaN	NaN	NaN	NaN		H3BJY1	H3BJY1_MOUSE	Syngr2	Synaptogyrin-2
O55106	STRN_MOUSE	Strn	Striatin		0.826798	0.14935	16	16	14	25	25	23.7	85.965	0	54.058	696020000	132	25.6444	25.5663	25.5136	25.6631	25.246	25.8319	25.3904	25.361	25.5005	25.3548	25.5555		O55106	STRN_MOUSE	Strn	Striatin
O55111	DSG2_MOUSE	Dsg2	Desmoglein-2		0.148334	0.0814643	7	7	7	8.8	8.8	8.8	122.38	0.00028952	9.4177	63972000	23	NaN	22.5589	NaN	22.2087	NaN	22.5197	22.7716	22.2581	22.6084	NaN	NaN		O55111	DSG2_MOUSE	Dsg2	Desmoglein-2
O55112	AFF2_MOUSE	Aff2	AF4/FMR2 family member 2		0.906757	0.759349	2	2	2	3.1	3.1	3.1	140.18	0.0016937	4.5066	5747100000	43	NaN	29.083	29.6684	NaN	NaN	30.1202	28.9205	NaN	28.1073	29.1002	28.8585		O55112	AFF2_MOUSE	Aff2	AF4/FMR2 family member 2
O55135	IF6_MOUSE	Eif6	Eukaryotic translation initiation factor 6		0.530315	0.127853	10	10	10	62	62	62	26.511	0	129.48	1841700000	200	24.7681	25.0275	25.0487	24.8823	24.7888	25.1515	24.9569	24.8762	25.3472	24.6696	24.863		O55135	IF6_MOUSE	Eif6	Eukaryotic translation initiation factor 6
O55137	ACOT1_MOUSE	Acot1	Acyl-coenzyme A thioesterase 1		0.101811	0.0175445	23	23	11	63.2	63.2	29.4	46.135	0	323.31	5948100000	673	26.2753	26.2215	26.4109	26.3872	26.2279	26.3563	26.2949	26.4225	26.294	26.5067	26.1733		O55137	ACOT1_MOUSE	Acot1	Acyl-coenzyme A thioesterase 1
O55142	RL35A_MOUSE	Rpl35a	60S ribosomal protein L35a		0.553955	-0.143981	11	11	11	38.2	38.2	38.2	12.554	0	45.314	10525000000	376	28.0274	27.7772	27.6812	27.4285	27.5433	27.9403	27.7054	28.1004	27.8879	27.921	27.623		O55142	RL35A_MOUSE	Rpl35a	60S ribosomal protein L35a
O55143	AT2A2_MOUSE	Atp2a2	Sarcoplasmic/endoplasmic reticulum calcium ATPase 2		1.02027	0.15576	45	45	28	47.1	47.1	30.8	114.86	0	323.31	6778200000	993	26.3481	26.7894	26.5421	26.6811	26.5147	26.4764	26.473	26.387	26.5942	26.5441	26.2317		O55143	AT2A2_MOUSE	Atp2a2	Sarcoplasmic/endoplasmic reticulum calcium ATPase 2
O55201	SPT5H_MOUSE	Supt5h	Transcription elongation factor SPT5		0.388476	0.0918486	20	20	20	24.1	24.1	24.1	120.66	0	68.534	520020000	115	23.6684	23.6908	23.6656	23.5674	23.4726	24.0094	23.8454	23.6059	23.9392	23.5081	23.7891		O55201	SPT5H_MOUSE	Supt5h	Transcription elongation factor SPT5
O55222	ILK_MOUSE	Ilk	Integrin-linked protein kinase		0.273131	0.0316458	23	23	23	52.7	52.7	52.7	51.373	0	167.83	3793500000	499	27.1739	27.3253	27.1953	27.1549	27.1654	27.2801	27.2485	27.1584	27.1135	27.32	27.3239		O55222	ILK_MOUSE	Ilk	Integrin-linked protein kinase
A0A2R8VJW3	A0A2R8VJW3_MOUSE	Gm44502	Predicted readthrough transcript (NMD candidate), 44502		0	NaN	1	1	1	11.7	11.7	11.7	19.619	0.0016843	4.3935	27189000	6	NaN	NaN	NaN	NaN	NaN	NaN	NaN	NaN	NaN	NaN	NaN		A0A2R8VJW3	A0A2R8VJW3_MOUSE	Gm44502	Predicted readthrough transcript (NMD candidate), 44502
O55234	PSB5_MOUSE	Psmb5	Proteasome subunit beta type-5		0.139586	-0.0389663	17	17	17	61	61	61	28.532	0	323.31	4338800000	445	26.2339	26.2706	26.5058	26.2467	26.2438	26.2061	25.8739	26.0302	26.3611	26.3418	26.3468		O55234	PSB5_MOUSE	Psmb5	Proteasome subunit beta type-5
O55242	SGMR1_MOUSE	Sigmar1	Sigma non-opioid intracellular receptor 1		0.121202	-0.0417576	4	4	4	32.3	32.3	32.3	25.25	0	12.76	396540000	48	23.9859	NaN	24.1721	23.8969	23.9689	23.7999	24.0772	NaN	24.3056	NaN	23.8528		O55242	SGMR1_MOUSE	Sigmar1	Sigma non-opioid intracellular receptor 1
O70152	DPM1_MOUSE	Dpm1	Dolichol-phosphate mannosyltransferase subunit 1		1.66182	-0.0993863	16	16	16	61.5	61.5	61.5	29.174	0	121.33	2301200000	289	27.1278	27.0771	27.1154	27.1743	27.2268	27.1743	27.1525	27.3085	27.3107	27.2575	27.1972		O70152	DPM1_MOUSE	Dpm1	Dolichol-phosphate mannosyltransferase subunit 1
O70194	EIF3D_MOUSE	Eif3d	Eukaryotic translation initiation factor 3 subunit D		0.213636	0.0223789	28	28	28	60.2	60.2	60.2	63.988	0	323.31	5385800000	772	26.7144	26.844	26.8259	26.6596	26.7949	26.6861	26.7189	26.7073	26.7915	26.6887	26.6503		O70194	EIF3D_MOUSE	Eif3d	Eukaryotic translation initiation factor 3 subunit D
O70200	AIF1_MOUSE	Aif1	Allograft inflammatory factor 1		0	NaN	2	2	2	18.4	18.4	18.4	16.91	0	82.272	4790600	8	NaN	NaN	NaN	NaN	NaN	NaN	NaN	NaN	NaN	NaN	NaN		O70200	AIF1_MOUSE	Aif1	Allograft inflammatory factor 1
O70209	PDLI3_MOUSE	Pdlim3	PDZ and LIM domain protein 3		1.54828	0.23977	13	13	13	63.3	63.3	63.3	34.299	0	146.34	1070000000	166	24.9135	25.0064	24.9288	24.9209	24.5882	25.0951	25.1975	24.7385	25.0342	24.8497	24.6155		O70209	PDLI3_MOUSE	Pdlim3	PDZ and LIM domain protein 3
Q8C4G3	Q8C4G3_MOUSE	Atp9a	Phospholipid-transporting ATPase		0.0970682	-0.0699701	5	5	3	5.2	5.2	3	116.42	0.0010336	5.9531	76696000	22	NaN	22.6713	23.3982	22.5459	23.2164	NaN	22.8709	NaN	22.6471	NaN	22.9612		Q8C4G3	Q8C4G3_MOUSE	Atp9a	Phospholipid-transporting ATPase
O70250	PGAM2_MOUSE	Pgam2	Phosphoglycerate mutase 2		0.453262	0.935878	12	8	8	54.2	39.5	39.5	28.827	0	133.54	1357200000	133	21.2818	26.1271	25.369	25.8567	24.378	23.2683	23.4285	25.1712	23.3881	25.151	NaN		O70250	PGAM2_MOUSE	Pgam2	Phosphoglycerate mutase 2
O70251	EF1B_MOUSE	Eef1b	Elongation factor 1-beta		0.0780359	-0.0181981	14	12	12	82.7	77.8	77.8	24.693	0	323.31	21288000000	1207	28.6124	28.6425	28.7997	28.5988	28.842	28.6346	28.3315	28.5694	28.596	28.5336	28.5644		O70251	EF1B_MOUSE	Eef1b	Elongation factor 1-beta
O70252	HMOX2_MOUSE	Hmox2	Heme oxygenase 2		0.054393	0.0172275	10	10	10	37.1	37.1	37.1	35.738	0	70.961	454400000	94	24.1088	24.0529	24.3033	24.3218	24.2647	24.2239	23.9563	23.8095	24.2857	24.0719	24.3859		O70252	HMOX2_MOUSE	Hmox2	Heme oxygenase 2
O70274	TP4A2_MOUSE	Ptp4a2	Protein tyrosine phosphatase type IVA 2		0.677998	-0.53522	4	4	4	25.7	25.7	25.7	19.127	0.00055356	7.8633	430120000	49	25.1935	24.1541	24.5519	23.2942	25.1181	25.8772	25.0559	25.0024	24.9378	25.3637	25.1158		O70274	TP4A2_MOUSE	Ptp4a2	Protein tyrosine phosphatase type IVA 2
O70302	CIDEA_MOUSE	Cidea	Cell death activator CIDE-A		0.32952	-0.105733	10	10	10	40.6	40.6	40.6	24.669	0	85.943	1164000000	131	25.422	25.4178	25.7549	25.5882	26.1017	25.8839	25.765	26.0768	25.7874	25.7072	25.6309		O70302	CIDEA_MOUSE	Cidea	Cell death activator CIDE-A
O70310	NMT1_MOUSE	Nmt1	Glycylpeptide N-tetradecanoyltransferase 1		0.151801	0.022754	24	24	20	49.8	49.8	48.2	56.888	0	194.55	3433300000	426	26.3729	26.3816	26.4183	26.4196	26.4893	26.422	26.5572	26.3741	26.2428	26.5733	26.4493		O70310	NMT1_MOUSE	Nmt1	Glycylpeptide N-tetradecanoyltransferase 1
F7APP3	F7APP3_MOUSE	Nmt2	Glycylpeptide N-tetradecanoyltransferase		0.0778357	-0.0367399	9	5	5	22.7	15.9	15.9	56.537	0.00027902	8.1206	247040000	25	24.146	NaN	NaN	24.2913	23.9726	23.6581	24.1115	NaN	24.2768	24.0523	23.8374		F7APP3	F7APP3_MOUSE	Nmt2	Glycylpeptide N-tetradecanoyltransferase
O70318	E41L2_MOUSE	Epb41l2	Band 4.1-like protein 2		0.260795	0.0448675	24	24	1	32.1	32.1	2.3	109.94	0	131.47	993770000	187	24.1643	24.2144	24.0695	23.9933	23.9132	23.9856	24.2737	23.9425	24.1042	24.0922	24.158		O70318	E41L2_MOUSE	Epb41l2	Band 4.1-like protein 2
S4R1E5	S4R1E5_MOUSE	Gpx4	Glutathione peroxidase		0.892058	0.158449	9	9	9	52.9	52.9	52.9	17.937	0	194.46	4039100000	290	28.1592	27.9851	28.3113	28.1998	27.9076	28.4182	28.0914	27.8516	28.2155	28.024	28.0983		S4R1E5	S4R1E5_MOUSE	Gpx4	Glutathione peroxidase
O70362	PHLD_MOUSE	Gpld1	Phosphatidylinositol-glycan-specific phospholipase D		0.21517	-0.0915383	14	14	14	22.2	22.2	22.2	93.254	0	28.259	280800000	86	23.733	23.5226	23.6018	23.7669	23.7118	23.9018	23.7989	24.1149	23.229	24.2494	23.8216		O70362	PHLD_MOUSE	Gpld1	Phosphatidylinositol-glycan-specific phospholipase D
O70378	EMC8_MOUSE	Emc8	ER membrane protein complex subunit 8		0.319661	-0.0774598	8	8	8	56.5	56.5	56.5	23.348	0	27.94	779360000	94	24.7404	24.3174	24.7716	24.4699	24.4282	24.5208	24.4011	24.719	24.6433	24.299	24.6119		O70378	EMC8_MOUSE	Emc8	ER membrane protein complex subunit 8
O70400	PDLI1_MOUSE	Pdlim1	PDZ and LIM domain protein 1		1.60218	0.185994	14	14	14	69.7	69.7	69.7	35.774	0	323.31	2563600000	278	24.7561	25.2047	25.1962	25.2134	25.0596	25.1008	25.0585	24.8414	25.1092	25.0594	24.9866		O70400	PDLI1_MOUSE	Pdlim1	PDZ and LIM domain protein 1
O70404	VAMP8_MOUSE	Vamp8	Vesicle-associated membrane protein 8		0.0115403	0.0049085	6	6	6	54.5	54.5	54.5	11.451	0	35.786	1410800000	100	25.5155	24.761	25.4563	25.3053	25.0321	25.4039	25.214	25.0572	25.3126	25.0488	25.3731		O70404	VAMP8_MOUSE	Vamp8	Vesicle-associated membrane protein 8
O70423	AOC3_MOUSE	Aoc3	Membrane primary amine oxidase		0.476802	0.205458	22	22	22	38.2	38.2	38.2	84.533	0	323.31	8724600000	977	27.33	27.1676	27.2422	27.5868	27.4005	26.9079	26.8528	26.4538	26.7688	26.9068	26.8162		O70423	AOC3_MOUSE	Aoc3	Membrane primary amine oxidase
O70435	PSA3_MOUSE	Psma3	Proteasome subunit alpha type-3		0.615963	0.0895613	14	14	14	54.1	54.1	54.1	28.405	0	168.41	5695700000	480	26.2497	26.5013	26.4922	26.4165	26.2047	26.2453	26.4507	26.3628	26.2594	26.3516	26.5617		O70435	PSA3_MOUSE	Psma3	Proteasome subunit alpha type-3
Q8BH40	Q8BH40_MOUSE	Stx7	Syntaxin-7		0.853876	-0.164503	7	7	7	36.8	36.8	36.8	29.736	0	62.667	650820000	82	24.3616	24.2337	24.3272	24.1059	24.4046	24.1972	24.3024	24.3323	24.7558	24.1019	24.4306		Q8BH40	Q8BH40_MOUSE	Stx7	Syntaxin-7
O70456	1433S_MOUSE	Sfn	14-3-3 protein sigma		1.85654	0.372142	18	16	16	73.4	66.1	66.1	27.706	0	89.533	2930200000	347	27.3763	27.9977	27.8387	27.8735	27.4308	27.8374	27.6915	27.3242	27.8836	27.1834	27.6554		O70456	1433S_MOUSE	Sfn	14-3-3 protein sigma
O70475	UGDH_MOUSE	Ugdh	UDP-glucose 6-dehydrogenase		0.104612	0.0379555	9	9	9	22.7	22.7	22.7	54.831	0	25.629	301380000	61	24.0595	24.4363	23.9288	24.0074	23.9303	23.8207	24.2116	23.7107	24.1141	24.3209	24.1226		O70475	UGDH_MOUSE	Ugdh	UDP-glucose 6-dehydrogenase
O70480	VAMP4_MOUSE	Vamp4	Vesicle-associated membrane protein 4		0	0.190062	2	2	2	19.1	19.1	19.1	16.353	0	25.973	50362000	22	NaN	NaN	21.5766	21.4419	21.3494	21.5998	NaN	NaN	NaN	NaN	NaN		O70480	VAMP4_MOUSE	Vamp4	Vesicle-associated membrane protein 4
Q6ZWQ5	Q6ZWQ5_MOUSE	Snx12	Sorting nexin-12		0.342504	0.172461	7	5	5	28.4	24.1	24.1	18.884	0.0015159	5.4033	225060000	25	24.8065	NaN	24.5221	24.4058	24.2455	24.5413	25.0266	NaN	24.5511	24.7155	23.9388		Q6ZWQ5	Q6ZWQ5_MOUSE	Snx12	Sorting nexin-12
O70503	DHB12_MOUSE	Hsd17b12	Very-long-chain 3-oxoacyl-CoA reductase		0.531161	-0.0744978	23	23	23	65.1	65.1	65.1	34.741	0	323.31	14977000000	916	28.4283	28.1866	28.4567	28.2479	28.4024	28.4477	28.5271	28.5469	28.5113	28.3667	28.4306		O70503	DHB12_MOUSE	Hsd17b12	Very-long-chain 3-oxoacyl-CoA reductase
O70551	SRPK1_MOUSE	Srpk1	SRSF protein kinase 1		0.127068	-0.0990435	9	9	9	19.6	19.6	19.6	73.088	0	15.658	410450000	50	26.2004	26.5134	26.8765	26.6481	26.2121	25.817	26.2416	26.3465	27.6251	26.39	26.3361		O70551	SRPK1_MOUSE	Srpk1	SRSF protein kinase 1
O70566	DIAP2_MOUSE	Diaph2	Protein diaphanous homolog 2		0	NaN	5	5	5	5.3	5.3	5.3	124.87	0.0014896	5.0178	11433000	7	NaN	NaN	NaN	NaN	NaN	NaN	NaN	NaN	NaN	NaN	NaN		O70566	DIAP2_MOUSE	Diaph2	Protein diaphanous homolog 2
O70570	PIGR_MOUSE	Pigr	Polymeric immunoglobulin receptor		1.00542	-0.165692	27	27	27	43.6	43.6	43.6	84.998	0	323.31	6068100000	614	28.4952	28.3532	27.9783	28.3173	28.348	28.0275	28.4254	28.3581	28.4376	28.4182	28.2591		O70570	PIGR_MOUSE	Pigr	Polymeric immunoglobulin receptor
O70572	NSMA_MOUSE	Smpd2	Sphingomyelin phosphodiesterase 2		1.49432	0.347206	7	7	7	22.4	22.4	22.4	47.466	0.00030817	11.972	335370000	44	23.8173	24.15	24.1237	24.0643	23.9785	24.4648	24.2277	23.3693	23.8931	24.1807	23.9143		O70572	NSMA_MOUSE	Smpd2	Sphingomyelin phosphodiesterase 2
O70579	PM34_MOUSE	Slc25a17	Peroxisomal membrane protein PMP34		0	0.684844	3	3	3	16.9	16.9	16.9	34.412	0.00055417	7.8791	72815000	24	24.1937	NaN	NaN	NaN	NaN	24.9867	24.7704	NaN	NaN	NaN	NaN		O70579	PM34_MOUSE	Slc25a17	Peroxisomal membrane protein PMP34
B1AV01	B1AV01_MOUSE	Mid1	E3 ubiquitin-protein ligase Midline-1		0.567758	0.215965	5	5	5	10.1	10.1	10.1	71.747	0.0026159	4.2262	90508000	14	22.5379	22.7347	NaN	22.9554	NaN	NaN	NaN	NaN	NaN	NaN	22.7203		B1AV01	B1AV01_MOUSE	Mid1	E3 ubiquitin-protein ligase Midline-1
G3UY34	G3UY34_MOUSE	Dtnb	Dystrobrevin		0.540251	0.160821	5	5	5	11.9	11.9	11.9	67.762	0.00030628	11.62	159130000	49	22.6525	22.604	22.6177	22.358	22.1456	22.9557	22.741	22.7692	22.6661	22.4766	22.2569		G3UY34	G3UY34_MOUSE	Dtnb	Dystrobrevin
A0A067XG53	A0A067XG53_MOUSE	Cask	Peripheral plasma membrane protein CASK (Fragment)		0.391105	-0.132565	11	11	11	15.3	15.3	15.3	99.226	0	14.929	180740000	56	24.1858	24.3888	NaN	23.9647	24.4779	24.317	24.538	24.3343	24.5438	24.8132	24.2531		A0A067XG53	A0A067XG53_MOUSE	Cask	Peripheral plasma membrane protein CASK (Fragment)
O70591	PFD2_MOUSE	Pfdn2	Prefoldin subunit 2		0.664073	0.191422	5	5	5	36.4	36.4	36.4	16.534	0	26.445	318190000	63	23.6177	24.028	24.1083	23.7391	23.2788	23.9946	23.889	23.9066	23.7691	24.1442	23.8459		O70591	PFD2_MOUSE	Pfdn2	Prefoldin subunit 2
O88271	CFDP1_MOUSE	Cfdp1	Craniofacial development protein 1		0.0568388	0.0109156	4	4	4	18	18	18	32.921	0.0002942	9.9351	171280000	32	22.6688	NaN	22.6786	22.7874	22.5989	22.6515	22.8456	22.7363	NaN	22.8903	22.755		O88271	CFDP1_MOUSE	Cfdp1	Craniofacial development protein 1
A0A0R4J098	A0A0R4J098_MOUSE	Zfp326	Zinc finger protein 326		0	NaN	3	3	3	8.6	8.6	8.6	65.166	0.0015314	5.5865	22972000	7	NaN	NaN	NaN	NaN	NaN	NaN	NaN	NaN	NaN	NaN	NaN		A0A0R4J098	A0A0R4J098_MOUSE	Zfp326	Zinc finger protein 326
A0A286YCQ5	A0A286YCQ5_MOUSE	Nid2	Nidogen-2 (Fragment)		0.154185	-0.267942	8	8	8	11.4	11.4	11.4	128.41	0	20.352	80749000	34	NaN	22.1088	NaN	NaN	23.9473	23.8169	NaN	22.5781	23.8763	22.7417	23.0106		A0A286YCQ5	A0A286YCQ5_MOUSE	Nid2	Nidogen-2 (Fragment)
O88327	CTNL1_MOUSE	Ctnnal1	Alpha-catulin		0.461014	-0.164721	4	4	4	6.8	6.8	6.8	81.462	0.0050148	3.5801	41193000	20	22.8661	NaN	22.7479	22.8677	22.9537	22.9833	23.1584	23.4785	23.1179	NaN	NaN		O88327	CTNL1_MOUSE	Ctnnal1	Alpha-catulin
O88342	WDR1_MOUSE	Wdr1	WD repeat-containing protein 1		1.20556	0.127708	37	37	37	75.9	75.9	75.9	66.406	0	323.31	33625000000	2157	28.7009	28.8149	28.7568	28.7281	28.5876	28.5927	28.7109	28.4217	28.5032	28.6797	28.6647		O88342	WDR1_MOUSE	Wdr1	WD repeat-containing protein 1
A0A0R4J0T4	A0A0R4J0T4_MOUSE	Ikbkb	I-kappa-B kinase		0.991002	-0.47984	7	7	6	10	10	8.9	84.387	0.0005475	7.5351	200920000	35	23.4072	23.8514	22.9119	23.0174	24.6617	23.183	23.162	23.5266	23.6601	23.6174	23.3568		A0A0R4J0T4	A0A0R4J0T4_MOUSE	Ikbkb	I-kappa-B kinase
O88413	TULP3_MOUSE	Tulp3	Tubby-related protein 3		0	NaN	3	3	3	7	7	7	51.23	0.0064689	3.3096	46662000	12	NaN	NaN	NaN	NaN	NaN	NaN	NaN	NaN	NaN	NaN	NaN		O88413	TULP3_MOUSE	Tulp3	Tubby-related protein 3
O88441	MTX2_MOUSE	Mtx2	Metaxin-2		0.124164	-0.0398059	10	10	10	48.3	48.3	48.3	29.758	0	57.93	737420000	129	26.2662	26.5634	26.5171	26.3996	26.7749	26.7745	26.5852	26.8982	26.4988	26.4469	26.7617		O88441	MTX2_MOUSE	Mtx2	Metaxin-2
O88448	KLC2_MOUSE	Klc2	Kinesin light chain 2		0	NaN	8	3	3	18.9	7.3	7.3	66.662	0.00054705	7.5318	43570000	11	NaN	NaN	NaN	NaN	NaN	NaN	NaN	NaN	NaN	NaN	NaN		O88448	KLC2_MOUSE	Klc2	Kinesin light chain 2
O88455	DHCR7_MOUSE	Dhcr7	7-dehydrocholesterol reductase		0.242768	0.081599	4	4	4	7.6	7.6	7.6	53.918	0	18.289	1118200000	79	25.7175	25.3678	25.7689	25.7582	25.2646	25.8899	25.576	25.6391	25.9583	25.594	25.3699		O88455	DHCR7_MOUSE	Dhcr7	7-dehydrocholesterol reductase
A0A0R4IZW8	A0A0R4IZW8_MOUSE	Capns1	Calcium-activated neutral proteinase small subunit		0.0894219	-0.0325133	12	12	12	50.7	50.7	50.7	28.406	0	293.22	2242000000	280	26.2417	26.4977	26.1193	26.1411	26.2507	25.9921	26.2774	25.9577	26.4743	25.97	26.5339		A0A0R4IZW8	A0A0R4IZW8_MOUSE	Capns1	Calcium-activated neutral proteinase small subunit
Q3TYJ3	Q3TYJ3_MOUSE	Dync1i1	Cytoplasmic dynein 1 intermediate chain 1		0.415078	-0.445737	2	1	1	8.9	5.5	5.5	69.625	0	56.076	465900000	33	NaN	27.0467	26.6508	26.0474	NaN	27.2949	25.5226	NaN	26.5356	27.4529	26.8861		Q3TYJ3	Q3TYJ3_MOUSE	Dync1i1	Cytoplasmic dynein 1 intermediate chain 1
O88487	DC1I2_MOUSE	Dync1i2	Cytoplasmic dynein 1 intermediate chain 2		0.186129	0.032721	23	23	22	59.2	59.2	55.7	68.393	0	323.31	1916000000	322	26.8238	26.8461	26.8107	26.6722	26.7299	26.7889	26.6079	26.6391	26.4975	26.7548	26.8297		O88487	DC1I2_MOUSE	Dync1i2	Cytoplasmic dynein 1 intermediate chain 2
O88512	AP1G2_MOUSE	Ap1g2	AP-1 complex subunit gamma-like 2		0.675208	-0.131764	22	20	20	34	32.7	32.7	87.862	0	72.641	685110000	155	25.2363	25.3707	25.334	25.258	25.7063	25.1828	25.1789	25.1524	25.3128	25.5069	25.465		O88512	AP1G2_MOUSE	Ap1g2	AP-1 complex subunit gamma-like 2
A0A494BAG1	A0A494BAG1_MOUSE	Shoc2	Leucine-rich repeat protein SHOC-2 (Fragment)		0.195176	0.0979584	5	5	5	13.4	13.4	13.4	41.921	0.00029412	9.9226	121950000	35	24.1435	24.1705	24.4516	24.2882	23.9634	24.6143	24.2455	24.2157	NaN	24.967	23.9907		A0A494BAG1	A0A494BAG1_MOUSE	Shoc2	Leucine-rich repeat protein SHOC-2 (Fragment)
Q8VC91	Q8VC91_MOUSE	Ikbkg	Ikbkg protein		0.472322	0.25025	8	8	8	29.9	29.9	29.9	47.844	0	12.979	142100000	39	24.2383	23.6556	24.6384	24.0603	23.5552	24.3853	23.5107	NaN	23.8426	23.5983	23.7647		Q8VC91	Q8VC91_MOUSE	Ikbkg	Ikbkg protein
O88531	PPT1_MOUSE	Ppt1	Palmitoyl-protein thioesterase 1		0.292	-0.0718412	9	9	9	37.3	37.3	37.3	34.49	0	81.766	436740000	89	25.4848	25.2466	25.1961	25.0362	25.2635	25.1727	25.43	25.0556	25.1309	25.2443	25.55		O88531	PPT1_MOUSE	Ppt1	Palmitoyl-protein thioesterase 1
O88543	CSN3_MOUSE	Cops3	COP9 signalosome complex subunit 3		0.999888	0.343896	8	8	8	34	34	34	47.832	0	230.82	1098500000	181	26.0856	26.225	26.3123	26.8694	25.9923	25.8237	25.8942	25.8177	25.6995	25.6494	26.0418		O88543	CSN3_MOUSE	Cops3	COP9 signalosome complex subunit 3
O88544	CSN4_MOUSE	Cops4	COP9 signalosome complex subunit 4		0.0581644	-0.00764052	22	22	22	70.2	70.2	70.2	46.284	0	228.49	3074500000	369	26.0198	26.0839	26.1656	26.0053	25.9743	25.9359	25.9098	26.0565	26.0868	26.0467	25.9822		O88544	CSN4_MOUSE	Cops4	COP9 signalosome complex subunit 4
O88545	CSN6_MOUSE	Cops6	COP9 signalosome complex subunit 6		0.0035724	-0.000770187	13	13	13	54.9	54.9	54.9	35.88	0	107.16	1431600000	171	26.2494	26.4182	26.4213	26.2969	26.4799	26.2358	26.5408	26.3852	26.5501	26.3897	26.246		O88545	CSN6_MOUSE	Cops6	COP9 signalosome complex subunit 6
O88561	S27A3_MOUSE	Slc27a3	Solute carrier family 27 member 3		2.1098	0.0760209	24	24	24	44.7	44.7	44.7	72.964	0	323.31	4705800000	535	26.6213	26.7292	26.6897	26.7158	26.5871	26.6253	26.6971	26.5636	26.6266	26.6385	26.6554		O88561	S27A3_MOUSE	Slc27a3	Solute carrier family 27 member 3
O88569	ROA2_MOUSE	Hnrnpa2b1	Heterogeneous nuclear ribonucleoproteins A2/B1		0.500102	-0.264395	25	25	25	70.3	70.3	70.3	37.402	0	323.31	24000000000	1394	28.0621	27.5459	27.6877	27.5478	27.3048	28.1033	28.4169	28.3904	28.5192	28.2557	28.216		O88569	ROA2_MOUSE	Hnrnpa2b1	Heterogeneous nuclear ribonucleoproteins A2/B1
O88587	COMT_MOUSE	Comt	Catechol O-methyltransferase		0.0899388	-0.0239761	18	18	18	73.2	73.2	73.2	29.486	0	218.9	1732300000	310	24.5226	24.6559	24.5165	24.7153	24.4775	24.404	24.275	24.5802	24.3468	24.5051	24.7918		O88587	COMT_MOUSE	Comt	Catechol O-methyltransferase
E9PYD6	E9PYD6_MOUSE	Becn1	Beclin-1		0	NaN	4	4	4	14.4	14.4	14.4	32.104	0.0019189	4.3512	16577000	9	NaN	NaN	NaN	NaN	NaN	NaN	NaN	NaN	NaN	NaN	NaN		E9PYD6	E9PYD6_MOUSE	Becn1	Beclin-1
O88630	GOSR1_MOUSE	Gosr1	Golgi SNAP receptor complex member 1		0.610822	0.149085	10	10	10	54	54	54	28.489	0	59.241	725360000	99	24.768	24.8388	25.0268	25.0724	24.6665	25.2311	25.0435	24.8878	24.9026	25.3383	24.7975		O88630	GOSR1_MOUSE	Gosr1	Golgi SNAP receptor complex member 1
O88643	PAK1_MOUSE	Pak1	Serine/threonine-protein kinase PAK 1		0	NaN	9	4	4	21.1	9.9	9.9	60.736	0.0047923	3.606	38589000	10	NaN	NaN	NaN	NaN	NaN	NaN	NaN	NaN	NaN	NaN	NaN		O88643	PAK1_MOUSE	Pak1	Serine/threonine-protein kinase PAK 1
O88653	LTOR3_MOUSE	Lamtor3	Ragulator complex protein LAMTOR3		0.575566	0.284395	4	4	4	50	50	50	13.553	0	91.398	1406600000	150	26.2961	26.3209	26.7148	27.2719	27.217	27.1629	26.4933	26.4566	26.0974	26.5436	26.4394		O88653	LTOR3_MOUSE	Lamtor3	Ragulator complex protein LAMTOR3
O88668	CREG1_MOUSE	Creg1	Protein CREG1		0	0.212211	3	3	3	14.5	14.5	14.5	24.452	0.00053022	6.6393	72876000	22	24.4262	NaN	NaN	NaN	NaN	NaN	24.6931	NaN	NaN	24.5356	NaN		O88668	CREG1_MOUSE	Creg1	Protein CREG1
A2AGN7	A2AGN7_MOUSE	Psmc3	26S proteasome regulatory subunit 6A		0.0908451	0.0202613	23	23	9	61.8	61.8	19	44.669	0	323.31	3673200000	545	26.5081	26.6827	26.6956	26.652	26.7016	26.4723	26.3726	26.4134	26.7098	26.4316	26.5642		A2AGN7	A2AGN7_MOUSE	Psmc3	26S proteasome regulatory subunit 6A
O88696	CLPP_MOUSE	Clpp	ATP-dependent Clp protease proteolytic subunit, mitochondrial		0.261918	-0.05788	6	6	6	26.8	26.8	26.8	29.8	0	62.957	564600000	137	23.9418	24.0287	23.7786	23.9505	24.1399	23.889	24.0947	23.8591	24.1882	24.138	23.7701		O88696	CLPP_MOUSE	Clpp	ATP-dependent Clp protease proteolytic subunit, mitochondrial
A0A0J9YU62	A0A0J9YU62_MOUSE	Ctbp1	C-terminal-binding protein 1		0.155837	-0.0393447	15	15	12	41.5	41.5	35.2	46.527	0	48.714	766030000	125	25.0289	25.3481	25.0584	24.796	25.0886	24.9623	25.0379	25.1166	25.2994	25.0005	24.9453		A0A0J9YU62	A0A0J9YU62_MOUSE	Ctbp1	C-terminal-binding protein 1
O88736	DHB7_MOUSE	Hsd17b7	3-keto-steroid reductase/17-beta-hydroxysteroid dehydrogenase 7		0	NaN	3	3	3	12.6	12.6	12.6	37.316	0.00054348	7.335	28574000	6	NaN	NaN	NaN	NaN	NaN	NaN	NaN	NaN	NaN	NaN	NaN		O88736	DHB7_MOUSE	Hsd17b7	3-keto-steroid reductase/17-beta-hydroxysteroid dehydrogenase 7
O88738	BIRC6_MOUSE	Birc6	Baculoviral IAP repeat-containing protein 6		0.864102	0.104672	38	38	37	12.5	12.5	12.3	532.16	0	99.556	1059400000	217	26.1082	26.498	26.2526	26.4671	26.3808	26.4742	26.4522	26.3247	26.407	26.3372	26.3869		O88738	BIRC6_MOUSE	Birc6	Baculoviral IAP repeat-containing protein 6
O88746	TOM1_MOUSE	Tom1	Target of Myb protein 1		1.52368	-0.193216	16	16	16	55.9	55.9	55.9	54.325	0	127.1	782970000	187	25.7275	25.6396	25.7031	25.4699	25.7966	25.4489	25.4006	25.6954	25.9149	25.5917	25.6278		O88746	TOM1_MOUSE	Tom1	Target of Myb protein 1
O88792	JAM1_MOUSE	F11r	Junctional adhesion molecule A		0	-0.035347	3	3	3	13.3	13.3	13.3	32.423	0.00052659	6.4886	180670000	22	NaN	NaN	23.7462	NaN	NaN	NaN	NaN	23.7816	NaN	NaN	NaN		O88792	JAM1_MOUSE	F11r	Junctional adhesion molecule A
O88811	STAM2_MOUSE	Stam2	Signal transducing adapter molecule 2		0.0701589	0.0231742	9	9	7	21.2	21.2	17.6	57.454	0	54.038	436080000	80	25.2631	25.4813	25.1157	25.288	24.8441	25.2046	25.3563	25.3811	25.5476	25.2459	25.314		O88811	STAM2_MOUSE	Stam2	Signal transducing adapter molecule 2
D3Z4D1	D3Z4D1_MOUSE	Jtb	Protein JTB		0	NaN	1	1	1	13.7	13.7	13.7	10.478	0.0098776	2.8169	20637000	8	NaN	NaN	NaN	NaN	NaN	NaN	NaN	NaN	NaN	NaN	NaN		D3Z4D1	D3Z4D1_MOUSE	Jtb	Protein JTB
O88844	IDHC_MOUSE	Idh1	Isocitrate dehydrogenase [NADP] cytoplasmic		0.0997911	-0.0249705	29	28	28	63.3	61.1	61.1	46.674	0	323.31	5267400000	591	27.8574	27.8255	27.6536	27.6209	27.7048	27.5219	27.7649	27.5261	27.4517	27.8118	27.8622		O88844	IDHC_MOUSE	Idh1	Isocitrate dehydrogenase [NADP] cytoplasmic
O88845	AKA10_MOUSE	Akap10	A-kinase anchor protein 10, mitochondrial		0	-0.41818	3	3	3	5.1	5.1	5.1	73.631	0.00052452	6.4161	73344000	22	NaN	21.7279	NaN	21.7202	NaN	21.8633	NaN	22.1886	NaN	NaN	NaN		O88845	AKA10_MOUSE	Akap10	A-kinase anchor protein 10, mitochondrial
O88851	RBBP9_MOUSE	Rbbp9	Putative hydrolase RBBP9		0.198782	0.086879	7	7	7	56.5	56.5	56.5	20.911	0	23.906	343360000	61	25.2979	25.0731	25.0522	24.6966	24.4724	25.0897	25.3718	24.7863	25.0014	25.3374	24.9235		O88851	RBBP9_MOUSE	Rbbp9	Putative hydrolase RBBP9
O88947	FA10_MOUSE	F10	Coagulation factor X		1.72783	-0.30703	4	4	4	9.8	9.8	9.8	54.017	0.00028201	8.4843	84092000	26	22.0424	NaN	21.836	21.7591	22.1297	21.4165	21.5662	21.956	21.7043	21.9408	21.9355		O88947	FA10_MOUSE	F10	Coagulation factor X
O88952	LIN7C_MOUSE	Lin7c	Protein lin-7 homolog C		0.00955894	-0.00334307	10	10	10	59.4	59.4	59.4	21.834	0	108.38	1366200000	146	24.7009	24.4019	24.5546	24.3242	24.2145	24.7316	24.6208	24.7336	24.6795	24.5395	24.3116		O88952	LIN7C_MOUSE	Lin7c	Protein lin-7 homolog C
O88958	GNPI1_MOUSE	Gnpda1	Glucosamine-6-phosphate isomerase 1		0.88997	0.13572	8	8	6	36.7	36.7	28.7	32.549	0	32.466	376980000	75	24.1627	24.3941	24.3713	24.3333	24.3091	24.356	24.7343	24.2061	24.3313	24.4174	24.3859		O88958	GNPI1_MOUSE	Gnpda1	Glucosamine-6-phosphate isomerase 1
O88967	YMEL1_MOUSE	Yme1l1	ATP-dependent zinc metalloprotease YME1L1		0	0.0656633	6	6	6	12.6	12.6	12.6	80.027	0.00030788	11.915	52099000	19	NaN	NaN	22.3967	22.4878	22.3766	NaN	NaN	NaN	NaN	NaN	NaN		O88967	YMEL1_MOUSE	Yme1l1	ATP-dependent zinc metalloprotease YME1L1
O88968	TCO2_MOUSE	Tcn2	Transcobalamin-2		0.509397	-0.178371	17	17	17	52.3	52.3	52.3	47.585	0	107.87	1182500000	213	26.2698	26.0491	26.3194	26.3069	26.8523	26.2054	26.7182	26.812	26.12	26.4083	26.5265		O88968	TCO2_MOUSE	Tcn2	Transcobalamin-2
O88983	STX8_MOUSE	Stx8	Syntaxin-8		0.589758	-0.471046	6	6	6	33.9	33.9	33.9	26.925	0.00053605	6.9131	300280000	19	NaN	23.6758	NaN	NaN	NaN	NaN	24.1461	NaN	24.5687	24.1954	NaN		O88983	STX8_MOUSE	Stx8	Syntaxin-8
O88986	KBL_MOUSE	Gcat	2-amino-3-ketobutyrate coenzyme A ligase, mitochondrial		0.435613	-0.227057	10	10	10	35.3	35.3	35.3	44.93	0	55.209	252270000	65	23.8782	23.5823	23.9711	23.7523	23.8324	23.7496	22.7569	23.7958	24.3018	23.3416	23.5871		O88986	KBL_MOUSE	Gcat	2-amino-3-ketobutyrate coenzyme A ligase, mitochondrial
O89016	ABCD4_MOUSE	Abcd4	Lysosomal cobalamin transporter ABCD4		0	NaN	3	3	3	7.8	7.8	7.8	68.582	0.0060715	3.4114	62133000	10	NaN	NaN	NaN	NaN	NaN	NaN	NaN	NaN	NaN	NaN	NaN		O89016	ABCD4_MOUSE	Abcd4	Lysosomal cobalamin transporter ABCD4
O89017	LGMN_MOUSE	Lgmn	Legumain		0.889929	0.290938	6	6	6	19.3	19.3	19.3	49.372	0	97.986	1010800000	139	24.7598	24.8755	24.9988	25.1078	24.3606	25.382	25.5528	24.952	25.0706	25.0514	25.1601		O89017	LGMN_MOUSE	Lgmn	Legumain
O89020	AFAM_MOUSE	Afm	Afamin		0.8801	-0.226956	17	17	17	32.2	32.2	32.2	69.378	0	58.355	1499000000	210	26.5195	25.6193	25.8542	26.2163	26.1855	26.2455	26.1124	26.2432	26.3107	26.2172	25.9429		O89020	AFAM_MOUSE	Afm	Afamin
O89023	TPP1_MOUSE	Tpp1	Tripeptidyl-peptidase 1		0.279952	-0.233017	6	6	6	20.6	20.6	20.6	61.341	0	92.694	1015800000	129	26.501	26.1678	26.3033	25.8446	26.7103	27.9508	26.6422	26.678	26.7023	27.2263	27.0706		O89023	TPP1_MOUSE	Tpp1	Tripeptidyl-peptidase 1
O89050	MKLN1_MOUSE	Mkln1	Muskelin		0	-0.476663	3	3	3	5.3	5.3	5.3	84.877	0.00052124	6.183	173510000	22	23.3457	NaN	NaN	22.9795	NaN	NaN	NaN	23.4387	23.7568	23.2835	NaN		O89050	MKLN1_MOUSE	Mkln1	Muskelin
O89051	ITM2B_MOUSE	Itm2b	Integral membrane protein 2B		0.609136	0.177245	6	6	6	22.9	22.9	22.9	30.26	0.00029621	10.272	109690000	39	23.3155	23.1435	22.9721	22.8593	22.6976	23.1032	23.1937	22.7819	22.6855	22.6121	23.1699		O89051	ITM2B_MOUSE	Itm2b	Integral membrane protein 2B
O89053	COR1A_MOUSE	Coro1a	Coronin-1A		0.0153725	0.0130722	20	20	20	46.9	46.9	46.9	50.989	0	233.64	2332500000	344	26.6806	26.1715	26.1418	25.9979	25.8474	26.5454	27.3562	26.1881	26.401	26.3842	27.0755		O89053	COR1A_MOUSE	Coro1a	Coronin-1A
O89079	COPE_MOUSE	Cope	Coatomer subunit epsilon		0.0944196	-0.0274325	26	26	26	93.2	93.2	93.2	34.567	0	323.31	9254100000	1117	27.8251	27.9779	27.8473	27.631	27.9663	27.5019	27.5861	27.5847	27.7086	27.5347	27.7982		O89079	COPE_MOUSE	Cope	Coatomer subunit epsilon
Q8BG13	Q8BG13_MOUSE	Rbm3	RNA-binding protein 3		0.174117	-0.114175	6	6	6	50.6	50.6	50.6	16.761	0	230.43	2013800000	233	27.3091	26.7336	26.8489	26.9659	26.3206	27.4304	26.7849	26.7706	27.767	27.3742	26.8599		Q8BG13	Q8BG13_MOUSE	Rbm3	RNA-binding protein 3
G3X8Q0	G3X8Q0_MOUSE	Sp1	Transcription factor Sp1		0	NaN	1	1	1	1.9	1.9	1.9	80.443	0	13.901	11342000	7	NaN	NaN	NaN	NaN	NaN	NaN	NaN	NaN	NaN	NaN	NaN		G3X8Q0	G3X8Q0_MOUSE	Sp1	Transcription factor Sp1
O89103	C1QR1_MOUSE	Cd93	Complement component C1q receptor		0	NaN	1	1	1	2.8	2.8	2.8	69.354	0.0066534	3.2412	17986000	9	NaN	NaN	NaN	NaN	NaN	NaN	NaN	NaN	NaN	NaN	NaN		O89103	C1QR1_MOUSE	Cd93	Complement component C1q receptor
O89110	CASP8_MOUSE	Casp8	Caspase-8		0.444323	-0.116089	16	16	16	46	46	46	55.356	0	55.781	501860000	110	24.3368	24.4461	24.1007	23.7589	24.0033	24.1068	24.3067	24.2947	24.2647	24.3668	24.2931		O89110	CASP8_MOUSE	Casp8	Caspase-8
O89112	LANC1_MOUSE	Lancl1	Glutathione S-transferase LANCL1		0.232516	0.134037	7	7	7	26.8	26.8	26.8	45.341	0	26.502	179100000	37	23.4695	23.5187	24.48	23.7224	24.0139	23.5311	23.4604	23.5844	22.9936	23.9125	23.677		O89112	LANC1_MOUSE	Lancl1	Glutathione S-transferase LANCL1
P00329	ADH1_MOUSE	Adh1	Alcohol dehydrogenase 1		0.428867	-0.143031	14	14	14	49.9	49.9	49.9	39.771	0	128.16	1549500000	225	26.1246	26.178	25.8679	25.6117	25.7445	25.3102	25.8723	25.8938	26.072	25.6943	25.9371		P00329	ADH1_MOUSE	Adh1	Alcohol dehydrogenase 1
P00397	COX1_MOUSE	Mtco1	Cytochrome c oxidase subunit 1		0	0.438763	2	2	2	7.8	7.8	7.8	56.909	0	89.817	292410000	42	NaN	NaN	NaN	NaN	24.9171	25.4606	NaN	25.1266	NaN	NaN	NaN		P00397	COX1_MOUSE	Mtco1	Cytochrome c oxidase subunit 1
P00405	COX2_MOUSE	Mtco2	Cytochrome c oxidase subunit 2		0.0107004	0.00486781	8	8	8	48	48	48	25.976	0	323.31	17862000000	750	30.7842	30.8056	30.9551	30.6701	31.0501	30.6624	30.4958	30.8791	30.5732	30.1699	30.8213		P00405	COX2_MOUSE	Mtco2	Cytochrome c oxidase subunit 2
P00493	HPRT_MOUSE	Hprt1	Hypoxanthine-guanine phosphoribosyltransferase		0.803508	-0.167693	11	11	11	66.5	66.5	66.5	24.57	0	194.33	1329000000	178	26.7904	26.993	26.7807	26.8503	26.9389	26.3559	26.8001	26.7879	26.9669	27.0583	26.9998		P00493	HPRT_MOUSE	Hprt1	Hypoxanthine-guanine phosphoribosyltransferase
P00520	ABL1_MOUSE	Abl1	Tyrosine-protein kinase ABL1		0	NaN	2	2	1	1.8	1.8	1.1	122.67	0.009884	2.8302	220950000	6	NaN	NaN	NaN	NaN	NaN	NaN	NaN	NaN	NaN	NaN	NaN		P00520	ABL1_MOUSE	Abl1	Tyrosine-protein kinase ABL1
P00687	AMY1_MOUSE	Amy1	Alpha-amylase 1		0.352597	1.83115	27	27	27	72.8	72.8	72.8	57.643	0	323.31	8143800000	342	21.1524	30.303	21.9141	18.8405	21.3673	20.6147	22.7324	21.7295	NaN	NaN	19.9499		P00687	AMY1_MOUSE	Amy1	Alpha-amylase 1
P00920	CAH2_MOUSE	Ca2	Carbonic anhydrase 2		1.96825	-0.203419	16	16	16	71.5	71.5	71.5	29.032	0	323.31	13096000000	1099	27.8359	27.8711	27.7579	27.6673	28.0352	27.5086	27.7588	27.9542	27.9215	27.8595	27.8906		P00920	CAH2_MOUSE	Ca2	Carbonic anhydrase 2
P01027	CO3_MOUSE	C3	Complement C3		2.72512	-0.333884	111	111	100	70.2	70.2	66.4	186.48	0	323.31	50267000000	4287	28.6694	28.212	28.1945	28.5099	28.5683	28.4164	28.1599	28.7283	28.4612	28.691	28.6763		P01027	CO3_MOUSE	C3	Complement C3
P01029	CO4B_MOUSE	C4b	Complement C4-B		2.78373	0.466931	53	53	53	43.6	43.6	43.6	192.91	0	323.31	4914700000	841	27.3009	27.4936	27.4417	27.8048	27.3252	27.726	27.5706	27.1883	26.9118	27.216	26.9004		P01029	CO4B_MOUSE	C4b	Complement C4-B
P01173	WAP_MOUSE	Wap	Whey acidic protein		0	-1.25269	7	1	1	73.1	15.7	15.7	14.423	0	116.07	58139000	14	NaN	NaN	NaN	NaN	24.5888	23.3361	NaN	NaN	NaN	NaN	NaN		P01173	WAP_MOUSE	Wap	Whey acidic protein
P01631	KV2A7_MOUSE	1 SV=1	Ig kappa chain V-II region 26-10		0	NaN	4	1	1	38.9	21.2	21.2	12.273	0.00030741	11.82	20746000	9	NaN	NaN	NaN	NaN	NaN	NaN	NaN	NaN	NaN	NaN	NaN		P01631	KV2A7_MOUSE	1 SV=1	Ig kappa chain V-II region 26-10
P01635	KV5A3_MOUSE	1 SV=1	Ig kappa chain V-V region K2 (Fragment)		0	NaN	3	2	2	27.8	19.1	19.1	12.581	0	15.752	56079000	14	NaN	NaN	NaN	NaN	NaN	NaN	NaN	NaN	NaN	NaN	NaN		P01635	KV5A3_MOUSE	1 SV=1	Ig kappa chain V-V region K2 (Fragment)
P01638	KV5A6_MOUSE	4 SV=1	Ig kappa chain V-V region L6 (Fragment)		0	NaN	2	2	2	20	20	20	12.986	0.0015034	5.2214	6188900	4	NaN	NaN	NaN	NaN	NaN	NaN	NaN	NaN	NaN	NaN	NaN		P01638	KV5A6_MOUSE	4 SV=1	Ig kappa chain V-V region L6 (Fragment)
A0A140T8N0	A0A140T8N0_MOUSE	Igkv9-120	Immunoglobulin kappa chain variable 9-120 (Fragment)		0	NaN	2	2	2	12.8	12.8	12.8	12.805	0.0014584	4.642	12119000	3	NaN	NaN	NaN	NaN	NaN	NaN	NaN	NaN	NaN	NaN	NaN		A0A140T8N0	A0A140T8N0_MOUSE	Igkv9-120	Immunoglobulin kappa chain variable 9-120 (Fragment)
P01642	KV5A9_MOUSE	Gm10881	Ig kappa chain V-V region L7 (Fragment)		0	NaN	2	2	2	23.5	23.5	23.5	12.615	0.00078064	6.1304	24384000	4	NaN	NaN	NaN	NaN	NaN	NaN	NaN	NaN	NaN	NaN	NaN		P01642	KV5A9_MOUSE	Gm10881	Ig kappa chain V-V region L7 (Fragment)
P01645	KV5AC_MOUSE	1 SV=1	Ig kappa chain V-V region HP 93G7		0.975073	-0.541974	3	3	2	43.5	43.5	26.9	11.954	0	25.258	130690000	20	24.7266	23.567	NaN	24.4247	24.6851	23.5186	NaN	24.0421	24.1323	NaN	24.3075		P01645	KV5AC_MOUSE	1 SV=1	Ig kappa chain V-V region HP 93G7
P03977	KV3A4_MOUSE	1 SV=1	Ig kappa chain V-III region 50S10.1		0.249148	-0.443285	2	2	1	30.6	30.6	14.4	12.042	0	45.575	76833000	27	23.3732	NaN	23.2946	NaN	23.5784	22.3029	NaN	23.2511	NaN	21.7922	24.2152		P03977	KV3A4_MOUSE	1 SV=1	Ig kappa chain V-III region 50S10.1
P01671	KV3AJ_MOUSE	1 SV=1	Ig kappa chain V-III region PC 7175		0	NaN	2	1	1	44.1	27.9	27.9	12.01	0	14.139	7594900	2	NaN	NaN	NaN	NaN	NaN	NaN	NaN	NaN	NaN	NaN	NaN		P01671	KV3AJ_MOUSE	1 SV=1	Ig kappa chain V-III region PC 7175
A0A075B663	A0A075B663_MOUSE	Iglv1	Immunoglobulin lambda variable 1 (Fragment)		0	NaN	3	3	3	41.9	41.9	41.9	12.312	0	44.181	269500000	16	NaN	NaN	NaN	NaN	24.9145	NaN	NaN	NaN	NaN	25.9451	25.2492		A0A075B663	A0A075B663_MOUSE	Iglv1	Immunoglobulin lambda variable 1 (Fragment)
A0A1L1SUX8	A0A1L1SUX8_MOUSE	Thy1	Thy-1 antigen (Fragment)		0.779474	0.20507	5	5	5	47.2	47.2	47.2	14.038	0	41.706	741340000	95	24.5308	24.8612	24.6047	24.5213	24.439	24.8535	24.8549	24.2002	24.9478	24.7104	24.3759		A0A1L1SUX8	A0A1L1SUX8_MOUSE	Thy1	Thy-1 antigen (Fragment)
P01837	IGKC_MOUSE	Igkc	Immunoglobulin kappa constant		2.8848	-1.09842	8	8	8	73.8	73.8	73.8	11.934	0	323.31	3262100000	259	27.9869	26.682	25.9077	26.8823	27.1959	26.4256	26.1273	27.6619	27.0076	27.2991	27.869		P01837	IGKC_MOUSE	Igkc	Immunoglobulin kappa constant
P01843	LAC1_MOUSE	1 SV=1	Ig lambda-1 chain C region		0.964058	-1.62682	6	6	6	85.7	85.7	85.7	11.575	0	261.07	757700000	93	25.1128	22.7674	22.1668	24.476	24.2659	22.8717	NaN	25.286	21.717	25.6019	26.1999		P01843	LAC1_MOUSE	1 SV=1	Ig lambda-1 chain C region
P01844	LAC2_MOUSE	Iglc2	Ig lambda-2 chain C region		0	NaN	4	1	1	67.3	14.4	14.4	11.254	0.0094889	2.8692	28180000	11	NaN	NaN	NaN	NaN	NaN	NaN	NaN	NaN	NaN	NaN	NaN		P01844	LAC2_MOUSE	Iglc2	Ig lambda-2 chain C region
P01845	LAC3_MOUSE	Iglc3	Ig lambda-3 chain C region		0.0608042	-0.0954002	5	5	2	71.2	71.2	34.6	11.371	0	51.736	117700000	21	NaN	22.3318	NaN	22.0729	23.0871	22.461	23.2774	21.543	NaN	NaN	23.2634		P01845	LAC3_MOUSE	Iglc3	Ig lambda-3 chain C region
P01872	IGHM_MOUSE	Ighm	Immunoglobulin heavy constant mu		0.687239	0.500875	15	15	15	39.4	39.4	39.4	49.971	0	119.47	1382400000	205	25.7957	25.8734	25.8513	25.4014	25.5757	24.7838	25.9536	24.784	24.5136	24.1406	25.6213		P01872	IGHM_MOUSE	Ighm	Immunoglobulin heavy constant mu
P01887	B2MG_MOUSE	B2m	Beta-2-microglobulin		0.620093	-0.246736	3	3	3	40.3	40.3	40.3	13.779	0	73.239	3860200000	252	27.6792	27.4891	26.8264	27.2872	27.3043	27.4658	27.6295	27.9318	27.1803	27.9862	27.4363		P01887	B2MG_MOUSE	B2m	Beta-2-microglobulin
P01898	HA10_MOUSE	H2-Q10	H-2 class I histocompatibility antigen, Q10 alpha chain		1.93121	-0.266006	15	15	8	51.1	51.1	29.2	37.251	0	59.789	1405800000	219	26.5641	26.3552	26.3905	26.2677	26.7093	26.5284	26.6161	26.7774	26.9265	26.5659	26.6424		P01898	HA10_MOUSE	H2-Q10	H-2 class I histocompatibility antigen, Q10 alpha chain
P01899	HA11_MOUSE	H2-D1	H-2 class I histocompatibility antigen, D-B alpha chain		0.113548	-0.0624481	14	11	1	41.4	32	4.1	40.836	0	81.035	2134000000	196	25.1185	24.9748	25.0882	24.9247	24.9842	25.1701	25.9723	25.5098	25.2655	25.6625	25.1905		P01899	HA11_MOUSE	H2-D1	H-2 class I histocompatibility antigen, D-B alpha chain
P01901	HA1B_MOUSE	H2-K1	H-2 class I histocompatibility antigen, K-B alpha chain		0.170102	-0.0759005	14	12	9	51.2	45	35	41.301	0	66.144	1446100000	165	25.7593	25.3606	25.4227	25.3511	25.3849	25.6097	26.2837	25.7767	25.8346	25.746	25.5872		P01901	HA1B_MOUSE	H2-K1	H-2 class I histocompatibility antigen, K-B alpha chain
P02089	HBB2_MOUSE	Hbb-b2	Hemoglobin subunit beta-2		0	NaN	8	1	1	44.9	8.8	8.8	15.878	0.0064804	3.3377	167780000	10	NaN	NaN	NaN	NaN	NaN	NaN	NaN	NaN	NaN	NaN	NaN		P02089	HBB2_MOUSE	Hbb-b2	Hemoglobin subunit beta-2
P84244	H33_MOUSE	H3-3a	Histone H3.3		0.180238	0.164598	9	9	1	55.9	55.9	23.5	15.328	0	64.559	5312300000	207	26.2213	27.7785	26.1453	26.0625	26.661	27.0182	27.3649	26.4605	27.466	26.528	26.919		P84244	H33_MOUSE	H3-3a	Histone H3.3
P02469	LAMB1_MOUSE	Lamb1	Laminin subunit beta-1		1.15611	-0.244078	35	35	35	23.4	23.4	23.4	197.09	0	141.33	1611800000	343	24.4126	24.1977	24.2224	24.0073	24.517	24.2234	23.9312	24.3064	24.6873	24.2127	24.0269		P02469	LAMB1_MOUSE	Lamb1	Laminin subunit beta-1
P02664	CS2LB_MOUSE	Csn1s2b	Alpha-S2-casein-like B		0.902521	-0.458859	13	1	1	83.2	21	21	16.911	0	68.354	1120300000	229	25.0151	24.9997	24.4029	25.1433	25.7523	24.7644	25.3645	26.2112	25.077	24.9211	25.3863		P02664	CS2LB_MOUSE	Csn1s2b	Alpha-S2-casein-like B
P02772	FETA_MOUSE	Afp	Alpha-fetoprotein		0	-1.40403	1	1	1	2.1	2.1	2.1	67.337	0.0098755	2.8152	3206000000	89	29.5693	27.3625	NaN	NaN	NaN	NaN	NaN	NaN	28.9992	27.7312	NaN		P02772	FETA_MOUSE	Afp	Alpha-fetoprotein
P02802	MT1_MOUSE	Mt1	Metallothionein-1		0.504892	0.276625	2	2	2	55.7	55.7	55.7	6.0181	0	23.133	572610000	28	24.4107	25.2493	24.7869	25.3715	NaN	NaN	24.6662	NaN	NaN	24.8904	24.9245		P02802	MT1_MOUSE	Mt1	Metallothionein-1
P02816	PIP_MOUSE	Pip	Prolactin-inducible protein homolog		0.62793	1.04873	7	7	7	45.2	45.2	45.2	16.823	0	129.62	1383100000	130	25.9652	28.6131	25.8426	25.8241	26.412	24.0808	25.7991	24.9804	23.5167	24.0101	25.015		P02816	PIP_MOUSE	Pip	Prolactin-inducible protein homolog
P03888	NU1M_MOUSE	Mtnd1	NADH-ubiquinone oxidoreductase chain 1		0.265358	-0.194896	2	2	2	8.8	8.8	8.8	36.059	0.00029163	9.6091	222570000	32	25.5761	25.5202	25.4927	NaN	NaN	25.7121	24.6062	NaN	25.3845	25.6225	NaN		P03888	NU1M_MOUSE	Mtnd1	NADH-ubiquinone oxidoreductase chain 1
P03899	NU3M_MOUSE	Mtnd3	NADH-ubiquinone oxidoreductase chain 3		0	NaN	1	1	1	13	13	13	13.219	0.00054171	7.1731	69785000	11	NaN	NaN	NaN	NaN	NaN	NaN	NaN	NaN	NaN	NaN	NaN		P03899	NU3M_MOUSE	Mtnd3	NADH-ubiquinone oxidoreductase chain 3
P03911	NU4M_MOUSE	Mtnd4	NADH-ubiquinone oxidoreductase chain 4		0.53915	-0.163724	4	4	4	12.9	12.9	12.9	51.881	0	75.053	457650000	104	25.386	25.8175	25.5672	25.4803	25.9295	25.2536	25.9474	25.7293	25.7923	25.8967	25.9279		P03911	NU4M_MOUSE	Mtnd4	NADH-ubiquinone oxidoreductase chain 4
P03921	NU5M_MOUSE	Mtnd5	NADH-ubiquinone oxidoreductase chain 5		0.0264251	0.0127309	3	3	3	6.6	6.6	6.6	68.474	0	23.939	1150500000	105	27.5164	27.6411	27.5704	27.8999	27.6991	27.1784	27.5299	27.8666	27.6353	27.0153	27.5747		P03921	NU5M_MOUSE	Mtnd5	NADH-ubiquinone oxidoreductase chain 5
P03930	ATP8_MOUSE	Mtatp8	ATP synthase protein 8		0.145241	0.0691595	2	2	2	26.9	26.9	26.9	7.7662	0	72.33	4184000000	92	28.5346	28.0501	NaN	28.3914	28.3949	28.5869	28.4589	27.7048	28.3478	28.5574	28.2765		P03930	ATP8_MOUSE	Mtatp8	ATP synthase protein 8
P03953	CFAD_MOUSE	Cfd	Complement factor D		0.682415	-0.203947	7	7	7	44	44	44	28.057	0	151.53	2301200000	228	26.6153	26.1501	25.8577	25.8897	25.8137	25.8399	26.295	26.0941	26.3629	26.3064	26.0702		P03953	CFAD_MOUSE	Cfd	Complement factor D
P03958	ADA_MOUSE	Ada	Adenosine deaminase		0.0281246	0.0352346	11	11	11	32.4	32.4	32.4	39.991	0	21.537	187970000	39	22.839	24.2903	23.6739	23.4202	24.3875	22.0843	23.2687	22.7705	22.8805	23.7475	23.2486		P03958	ADA_MOUSE	Ada	Adenosine deaminase
P03975	IGEB_MOUSE	Iap	IgE-binding protein		0	-0.0172234	3	3	3	5.6	5.6	5.6	62.747	0.001462	4.6964	34042000	9	21.9934	NaN	NaN	NaN	NaN	NaN	21.9897	NaN	NaN	NaN	22.0205		P03975	IGEB_MOUSE	Iap	IgE-binding protein
A0A075B5P5	A0A075B5P5_MOUSE	Ighg3	Immunoglobulin heavy constant gamma 3 (Fragment)		0.716284	-1.31563	13	13	13	62.7	62.7	62.7	36.198	0	67.76	767270000	78	27.7988	23.0896	24.5775	23.7536	24.6351	22.1446	NaN	24.6104	24.1805	23.0212	23.9958		A0A075B5P5	A0A075B5P5_MOUSE	Ighg3	Immunoglobulin heavy constant gamma 3 (Fragment)
P04117	FABP4_MOUSE	Fabp4	Fatty acid-binding protein, adipocyte		0.147705	-0.0577499	22	22	22	90.9	90.9	90.9	14.65	0	323.31	206300000000	4142	31.3787	31.2554	30.8982	31.4723	30.922	31.256	30.9871	31.0639	31.0119	31.4604	31.5525		P04117	FABP4_MOUSE	Fabp4	Fatty acid-binding protein, adipocyte
P04247	MYG_MOUSE	Mb	Myoglobin		0.0331905	0.0824158	9	9	9	63.6	63.6	63.6	17.069	0	141.47	1378300000	170	25.9234	27.4491	27.2208	28.0549	25.6836	24.9904	24.022	27.1263	25.396	27.1957	NaN		P04247	MYG_MOUSE	Mb	Myoglobin
P04370	MBP_MOUSE	Mbp	Myelin basic protein		0.507342	0.351174	5	5	5	22	22	22	27.167	0	15.737	979950000	88	24.4013	25.2135	24.198	25.2679	24.2376	23.9562	25.1267	24.7201	23.7038	25.0624	24.2824		P04370	MBP_MOUSE	Mbp	Myelin basic protein
P04441	HG2A_MOUSE	Cd74	H-2 class II histocompatibility antigen gamma chain		0.0530262	0.106847	4	4	4	17.2	17.2	17.2	31.557	0.00053576	6.8772	79825000	20	22.8562	22.4863	NaN	NaN	NaN	NaN	23.7539	NaN	NaN	NaN	23.1702		P04441	HG2A_MOUSE	Cd74	H-2 class II histocompatibility antigen gamma chain
P04627	ARAF_MOUSE	Araf	Serine/threonine-protein kinase A-Raf		0.504986	-0.188106	10	10	7	20.4	20.4	15.2	67.581	0	17.188	177050000	58	23.4315	22.9475	23.2	23.2483	23.6323	22.799	23.4593	22.9213	23.5537	22.9323	23.4424		P04627	ARAF_MOUSE	Araf	Serine/threonine-protein kinase A-Raf
P04919	B3AT_MOUSE	Slc4a1	Band 3 anion transport protein		0.37331	-0.222503	11	11	11	16.6	16.6	16.6	103.13	0	43.167	490400000	84	24.5359	25.0411	24.7389	24.654	25.3531	24.9048	24.2082	25.2127	25.5952	24.4212	24.4734		P04919	B3AT_MOUSE	Slc4a1	Band 3 anion transport protein
P05063	ALDOC_MOUSE	Aldoc	Fructose-bisphosphate aldolase C		0.48064	0.0728534	39	39	34	93.7	93.7	82.1	39.394	0	323.31	69601000000	3140	29.8521	29.8782	29.9103	29.6875	29.7483	29.8536	29.6837	29.8439	29.7564	29.5287	29.6495		P05063	ALDOC_MOUSE	Aldoc	Fructose-bisphosphate aldolase C
P05064	ALDOA_MOUSE	Aldoa	Fructose-bisphosphate aldolase A		0.176211	0.0723324	35	30	2	90.4	78.8	3.6	39.355	0	323.31	70000000000	2971	29.9727	30.8492	30.2671	30.4863	30.233	30.1528	30.2475	30.4724	30.3116	30.7419	30.2379		P05064	ALDOA_MOUSE	Aldoa	Fructose-bisphosphate aldolase A
P05132	KAPCA_MOUSE	Prkaca	cAMP-dependent protein kinase catalytic subunit alpha		0.486201	-0.149108	12	3	3	34.2	15.1	15.1	40.57	0	306.54	458590000	55	24.1928	24.371	24.3431	24.0644	24.7168	24.006	24.5209	24.6178	24.1385	24.227	24.5681		P05132	KAPCA_MOUSE	Prkaca	cAMP-dependent protein kinase catalytic subunit alpha
P05201	AATC_MOUSE	Got1	Aspartate aminotransferase, cytoplasmic		0.068506	0.0159486	38	38	38	91.3	91.3	91.3	46.247	0	323.31	21078000000	1513	28.2056	28.3088	28.3904	28.1866	28.3329	27.9375	28.1054	28.1346	28.0856	28.2	28.06		P05201	AATC_MOUSE	Got1	Aspartate aminotransferase, cytoplasmic
P05202	AATM_MOUSE	Got2	Aspartate aminotransferase, mitochondrial		0.00869224	-0.00336431	33	33	33	78.4	78.4	78.4	47.411	0	323.31	30972000000	1672	30.9139	30.947	30.9638	31.0477	30.8303	31.4	31.0314	31.2776	31.0725	31.4544	30.9393		P05202	AATM_MOUSE	Got2	Aspartate aminotransferase, mitochondrial
P05213	TBA1B_MOUSE	Tuba1b	Tubulin alpha-1B chain		0.203328	0.0735642	39	6	0	77.2	18.4	0	50.151	0	296.39	6545300000	501	28.9914	28.6395	28.8241	28.9202	28.3937	28.8247	28.7045	28.5585	29.1858	28.5397	28.585		P05213	TBA1B_MOUSE	Tuba1b	Tubulin alpha-1B chain
P05366	SAA1_MOUSE	Saa1	Serum amyloid A-1 protein		1.35329	1.39962	5	5	4	41.8	41.8	33.6	13.77	0	44.884	403110000	63	22.4693	23.1693	22.6231	25.2819	22.327	24.6885	24.1995	22.9338	NaN	21.6289	23.6051		P05366	SAA1_MOUSE	Saa1	Serum amyloid A-1 protein
A0A1B0GQV5	A0A1B0GQV5_MOUSE	Saa2	Serum amyloid A protein		0	NaN	3	2	2	39.8	28.4	28.4	10.074	0.00052729	6.5389	76509000	12	NaN	NaN	NaN	24.9781	NaN	23.4015	NaN	NaN	NaN	NaN	NaN		A0A1B0GQV5	A0A1B0GQV5_MOUSE	Saa2	Serum amyloid A protein
F8WI90	F8WI90_MOUSE	Src	Tyrosine-protein kinase		1.15335	0.232793	18	18	13	37.4	37.4	31.4	59.89	0	35.308	402510000	87	23.7313	23.982	23.9507	23.7695	23.776	23.9666	23.9258	23.7666	23.2086	23.8763	23.758		F8WI90	F8WI90_MOUSE	Src	Tyrosine-protein kinase
P05977	MYL1_MOUSE	Myl1	Myosin light chain 1/3, skeletal muscle isoform		0.0656091	-0.0663722	11	1	1	54.8	10.6	10.6	20.594	0.0098459	2.7732	45056000	16	NaN	21.9641	21.384	21.3587	21.3236	NaN	NaN	NaN	NaN	21.947	NaN		P05977	MYL1_MOUSE	Myl1	Myosin light chain 1/3, skeletal muscle isoform
P06151	LDHA_MOUSE	Ldha	L-lactate dehydrogenase A chain		0.23052	0.0394441	45	45	42	96.4	96.4	96.4	36.498	0	323.31	233100000000	6447	33.1551	33.2729	33.224	33.1814	33.0887	32.9129	32.974	33.0114	32.9905	33.0854	33.1107		P06151	LDHA_MOUSE	Ldha	L-lactate dehydrogenase A chain
P06537	GCR_MOUSE	Nr3c1	Glucocorticoid receptor		0.133756	-0.0834371	9	9	2	14	14	1.8	86.052	0	12.292	63035000	28	22.0658	NaN	21.7361	21.3041	21.99	22.3547	22.0627	22.0982	22.0889	21.4963	NaN		P06537	GCR_MOUSE	Nr3c1	Glucocorticoid receptor
A0A0R4J032	A0A0R4J032_MOUSE	C9	Complement component C9		0.587544	0.249935	7	7	7	11.1	11.1	11.1	63.425	0.00028827	9.3315	88167000	30	22.3354	22.5266	22.0825	22.4652	21.9045	22.86	NaN	22.2208	NaN	NaN	22.4737		A0A0R4J032	A0A0R4J032_MOUSE	C9	Complement component C9
P06684	CO5_MOUSE	C5	Complement C5		1.05467	-0.211556	14	14	14	10.8	10.8	10.8	188.88	0	31.252	597460000	82	24.6377	24.6323	24.1788	24.4545	24.8376	24.8597	24.6167	24.8118	24.7676	24.8588	24.6461		P06684	CO5_MOUSE	C5	Complement C5
P06728	APOA4_MOUSE	Apoa4	Apolipoprotein A-IV		0.563159	-0.087183	31	31	31	76.7	76.7	76.7	45.029	0	323.31	40717000000	1893	29.9997	29.5953	29.8787	29.8275	29.9153	29.6525	29.709	29.7856	29.7781	29.6288	29.8112		P06728	APOA4_MOUSE	Apoa4	Apolipoprotein A-IV
P06745	G6PI_MOUSE	Gpi	Glucose-6-phosphate isomerase		0.0647481	-0.0092907	35	35	35	72.4	72.4	72.4	62.766	0	323.31	28286000000	2280	29.8035	29.9378	29.8049	29.7827	29.8022	29.9007	29.7941	29.9573	29.7294	29.9746	29.8529		P06745	G6PI_MOUSE	Gpi	Glucose-6-phosphate isomerase
P06796	CASK_MOUSE	Csn3	Kappa-casein		0.2593	-0.162008	10	10	10	35.9	35.9	35.9	20.03	0	323.31	169740000000	1679	33.1301	32.8219	33.1887	33.3292	33.6208	32.5263	33.5808	33.7281	32.6293	32.8792	33.521		P06796	CASK_MOUSE	Csn3	Kappa-casein
P06797	CATL1_MOUSE	Ctsl	Procathepsin L		0.842634	0.608233	13	13	13	42.2	42.2	42.2	37.547	0	323.31	2819500000	316	25.2327	25.2235	26.0102	26.4956	25.4666	25.88	26.8576	24.9492	24.8539	25.8875	26.5208		P06797	CATL1_MOUSE	Ctsl	Procathepsin L
S4R1M0	S4R1M0_MOUSE	Ptprc	Protein-tyrosine-phosphatase		1.12179	0.488034	9	9	9	11.2	11.2	11.2	128.57	0	34.38	581320000	38	26.2072	NaN	NaN	26.5891	NaN	27.0982	27.1944	26.681	NaN	26.2996	26.7023		S4R1M0	S4R1M0_MOUSE	Ptprc	Protein-tyrosine-phosphatase
P06801	MAOX_MOUSE	Me1	NADP-dependent malic enzyme		1.13094	-0.157559	64	64	64	91.1	91.1	91.1	63.953	0	323.31	290180000000	12503	32.4136	32.3313	32.4146	32.3602	32.6177	32.1421	32.2551	32.6092	32.3439	32.2606	32.5043		P06801	MAOX_MOUSE	Me1	NADP-dependent malic enzyme
P06909	CFAH_MOUSE	Cfh	Complement factor H		1.13294	-0.21917	26	26	22	29.7	29.7	24.7	139.14	0	166.03	1510900000	263	25.1037	24.8321	24.9	25.1619	25.3688	25.2337	25.3199	25.4662	25.2519	25.2047	25.4571		P06909	CFAH_MOUSE	Cfh	Complement factor H
A0A0G2JGD2	A0A0G2JGD2_MOUSE	S100a4	Protein S100-A4 (Fragment)		0.112021	0.0784235	2	2	2	32.1	32.1	32.1	9.0621	0.00028637	9.053	616450000	149	25.8723	26.2082	25.5574	26.262	25.3019	25.1754	26.0831	25.4878	25.7765	25.7566	26.4778		A0A0G2JGD2	A0A0G2JGD2_MOUSE	S100a4	Protein S100-A4 (Fragment)
Q5NCU4	Q5NCU4_MOUSE	Sparc	Osteonectin		1.03135	-0.167914	7	7	7	31.9	31.9	31.9	34.322	0	36.377	355220000	65	23.7817	23.7704	23.533	23.9231	23.8394	23.8105	23.9543	24.1279	23.9884	24.024	24.0356		Q5NCU4	Q5NCU4_MOUSE	Sparc	Osteonectin
P07309	TTHY_MOUSE	Ttr	Transthyretin		1.7552	-1.01804	8	8	8	73.5	73.5	73.5	15.776	0	323.31	2591100000	163	27.9105	27.661	27.336	26.4703	28.8357	27.1284	28.3574	28.1769	28.71	28.9201	27.8987		P07309	TTHY_MOUSE	Ttr	Transthyretin
P07310	KCRM_MOUSE	Ckm	Creatine kinase M-type		0.523835	1.22448	32	32	32	78.2	78.2	78.2	43.044	0	323.31	27431000000	1470	26.3056	30.2264	29.1362	29.7492	28.6504	26.9035	27.2341	29.0858	27.9758	28.8033	23.7315		P07310	KCRM_MOUSE	Ckm	Creatine kinase M-type
P07356	ANXA2_MOUSE	Anxa2	Annexin A2		1.43386	0.274683	39	39	39	84.7	84.7	84.7	38.676	0	323.31	32361000000	1857	30.7642	31.0386	30.8272	30.9488	30.5205	30.7186	30.7403	30.1765	30.7304	30.6804	30.608		P07356	ANXA2_MOUSE	Anxa2	Annexin A2
P07361	A1AG2_MOUSE	Orm2	Alpha-1-acid glycoprotein 2		0.668396	0.627543	9	5	5	38.6	22.7	22.7	23.843	0.00028885	9.3806	361810000	62	25.7058	25.766	NaN	27.3402	25.3634	26.162	26.0538	NaN	NaN	NaN	26.0397		P07361	A1AG2_MOUSE	Orm2	Alpha-1-acid glycoprotein 2
P07724	ALBU_MOUSE	Alb	Albumin		1.51033	-0.192065	81	81	77	86.3	86.3	86.3	68.692	0	323.31	1931000000000	30831	33.6566	33.1457	33.0921	33.3006	33.2791	33.1992	33.1462	33.3902	33.2311	33.3246	33.3315		P07724	ALBU_MOUSE	Alb	Albumin
P07742	RIR1_MOUSE	Rrm1	Ribonucleoside-diphosphate reductase large subunit		0.973917	0.264467	4	4	4	7.8	7.8	7.8	90.209	0	14.574	38589000	13	NaN	23.1597	NaN	23.163	NaN	NaN	23.1943	NaN	23.1443	22.8688	22.7105		P07742	RIR1_MOUSE	Rrm1	Ribonucleoside-diphosphate reductase large subunit
B7ZCG3	B7ZCG3_MOUSE	Bpifa2	BPI fold-containing family A member 2 (Fragment)		0	NaN	12	12	12	67.3	67.3	67.3	22.321	0	323.31	7909400000	243	NaN	30.7137	23.3055	NaN	NaN	NaN	24.0868	NaN	NaN	NaN	NaN		B7ZCG3	B7ZCG3_MOUSE	Bpifa2	BPI fold-containing family A member 2 (Fragment)
P07758	A1AT1_MOUSE	Serpina1a	Alpha-1-antitrypsin 1-1		0.263978	-0.275266	26	2	2	62	12.6	12.6	46.002	0	307.98	3490500000	142	29.6525	29.1672	29.4418	29.6194	29.9535	28.1387	29.2083	29.995	28.1807	28.5301	30.0304		P07758	A1AT1_MOUSE	Serpina1a	Alpha-1-antitrypsin 1-1
P07901	HS90A_MOUSE	Hsp90aa1	Heat shock protein HSP 90-alpha		0.835893	0.0867832	66	46	46	67.7	55.3	55.3	84.787	0	323.31	39354000000	2754	30.2633	30.3951	30.3659	30.5419	30.2985	30.4507	30.4926	30.2554	30.4802	30.4087	30.4685		P07901	HS90A_MOUSE	Hsp90aa1	Heat shock protein HSP 90-alpha
P08003	PDIA4_MOUSE	Pdia4	Protein disulfide-isomerase A4		0.163958	0.029947	45	45	45	58.6	58.6	58.6	71.982	0	323.31	19337000000	1726	27.044	26.9295	26.8989	26.9388	26.7723	27.1059	26.8903	26.7308	27.0435	26.9502	26.9956		P08003	PDIA4_MOUSE	Pdia4	Protein disulfide-isomerase A4
P08030	APT_MOUSE	Aprt	Adenine phosphoribosyltransferase		0.438541	0.126325	9	9	9	64.4	64.4	64.4	19.724	0	76.785	937980000	133	26.1526	26.3275	26.2018	26.2101	25.9039	26.077	26.2813	26.2738	26.3114	25.6144	26.3031		P08030	APT_MOUSE	Aprt	Adenine phosphoribosyltransferase
P08071	TRFL_MOUSE	Ltf	Lactotransferrin		1.10632	0.604394	64	64	64	77.4	77.4	77.4	77.837	0	323.31	136560000000	5610	29.6114	30.2811	29.5789	30.6265	29.5707	29.7685	30.6354	28.7651	29.3958	29.745	30.3542		P08071	TRFL_MOUSE	Ltf	Lactotransferrin
P08074	CBR2_MOUSE	Cbr2	Carbonyl reductase [NADPH] 2		1.11563	0.142881	12	12	12	69.3	69.3	69.3	25.958	0	189.2	1645600000	216	26.5561	26.8768	26.7104	26.7407	26.4926	26.7802	26.8935	26.7405	26.8294	26.7744	26.5517		P08074	CBR2_MOUSE	Cbr2	Carbonyl reductase [NADPH] 2
P08113	ENPL_MOUSE	Hsp90b1	Endoplasmin		3.18066	-0.156321	65	63	63	63.6	61.8	61.8	92.475	0	323.31	78011000000	4138	30.5857	30.3225	30.36	30.3909	30.5139	30.3249	30.3909	30.4311	30.5275	30.4564	30.5704		P08113	ENPL_MOUSE	Hsp90b1	Endoplasmin
P08122	CO4A2_MOUSE	Col4a2	Collagen alpha-2(IV) chain		0	NaN	2	2	2	1.5	1.5	1.5	167.32	0.0014811	4.8971	47501000	11	NaN	NaN	NaN	NaN	23.5516	NaN	NaN	NaN	23.7512	NaN	NaN		P08122	CO4A2_MOUSE	Col4a2	Collagen alpha-2(IV) chain
P08207	S10AA_MOUSE	S100a10	Protein S100-A10		0.011086	0.00514577	4	4	4	54.6	54.6	54.6	11.186	0	84.016	2461100000	327	26.4732	26.5946	26.4357	26.52	26.6377	26.5848	26.1106	26.1062	26.654	26.7539	26.039		P08207	S10AA_MOUSE	S100a10	Protein S100-A10
P08226	APOE_MOUSE	Apoe	Apolipoprotein E		1.0198	-0.279891	19	19	19	54.3	54.3	54.3	35.866	0	323.31	4258100000	351	25.8555	25.4537	25.8675	25.8894	26.0238	25.8619	25.9117	26.6088	25.948	25.86	26.1641		P08226	APOE_MOUSE	Apoe	Apolipoprotein E
P08228	SODC_MOUSE	Sod1	Superoxide dismutase [Cu-Zn]		0.622761	0.100459	14	14	14	67.5	67.5	67.5	15.942	0	323.31	47444000000	1337	31.0577	30.8431	30.9183	31.0682	30.6702	31.0944	31.1209	30.9176	30.856	30.9221	31.0276		P08228	SODC_MOUSE	Sod1	Superoxide dismutase [Cu-Zn]
P08249	MDHM_MOUSE	Mdh2	Malate dehydrogenase, mitochondrial		0.263114	-0.0625549	22	22	22	66.3	66.3	66.3	35.611	0	323.31	70712000000	2261	30.4906	30.4488	30.6872	30.6845	30.5851	30.6704	30.4872	31.005	30.517	30.7598	30.5917		P08249	MDHM_MOUSE	Mdh2	Malate dehydrogenase, mitochondrial
A0A0R4J036	A0A0R4J036_MOUSE	Nefm	160 kDa neurofilament protein		0	NaN	6	4	1	5.9	4.5	1.2	95.94	0.0056574	3.4857	19464000	7	NaN	NaN	NaN	NaN	NaN	NaN	NaN	NaN	NaN	NaN	NaN		A0A0R4J036	A0A0R4J036_MOUSE	Nefm	160 kDa neurofilament protein
P08607	C4BPA_MOUSE	C4bpa	C4b-binding protein		0	NaN	3	3	3	11.3	11.3	11.3	51.523	0.00052206	6.2098	67977000	20	NaN	NaN	NaN	NaN	NaN	NaN	NaN	NaN	NaN	NaN	NaN		P08607	C4BPA_MOUSE	C4bpa	C4b-binding protein
P08752	GNAI2_MOUSE	Gnai2	Guanine nucleotide-binding protein G(i) subunit alpha-2		0.133397	-0.03887	21	21	11	52.7	52.7	31	40.489	0	323.31	4896200000	335	29.6206	29.7764	29.4104	29.5764	29.6785	29.4414	29.7918	29.3088	29.6131	29.8745	29.7333		P08752	GNAI2_MOUSE	Gnai2	Guanine nucleotide-binding protein G(i) subunit alpha-2
P08905	LYZ2_MOUSE	Lyz2	Lysozyme C-2		0.230209	0.306887	3	3	3	18.9	18.9	18.9	16.689	0	40.666	210000000	26	NaN	24.5681	NaN	23.3641	23.4219	NaN	24.0965	NaN	23.2171	NaN	24.4692		P08905	LYZ2_MOUSE	Lyz2	Lysozyme C-2
P09055	ITB1_MOUSE	Itgb1	Integrin beta-1		1.05744	0.154219	18	18	18	29.3	29.3	29.3	88.231	0	202.18	2354400000	374	26.3184	26.4213	26.4805	26.5597	26.1787	26.6396	26.4127	26.2236	26.5679	26.5079	26.2947		P09055	ITB1_MOUSE	Itgb1	Integrin beta-1
P09103	PDIA1_MOUSE	P4hb	Protein disulfide-isomerase		0.0117073	-0.00203997	62	62	62	84.7	84.7	84.7	57.058	0	323.31	304590000000	9630	31.6324	31.485	31.644	31.4706	31.3652	31.5447	31.3556	31.5722	31.4854	31.4888	31.468		P09103	PDIA1_MOUSE	P4hb	Protein disulfide-isomerase
P09242	PPBT_MOUSE	Alpl	Alkaline phosphatase, tissue-nonspecific isozyme		0.657258	0.102351	7	7	7	16.2	16.2	16.2	57.514	0	100.11	319650000	70	23.9988	23.9019	23.8533	23.9677	23.8786	24.0112	23.7815	23.643	23.7857	23.8894	23.6092		P09242	PPBT_MOUSE	Alpl	Alkaline phosphatase, tissue-nonspecific isozyme
P09405	NUCL_MOUSE	Ncl	Nucleolin		0.0143897	-0.00542456	26	26	26	37.1	37.1	37.1	76.722	0	323.31	10499000000	907	27.3366	27.4071	27.2226	27.3099	27.1353	27.683	27.6346	27.4225	27.7703	27.631	27.4457		P09405	NUCL_MOUSE	Ncl	Nucleolin
P09411	PGK1_MOUSE	Pgk1	Phosphoglycerate kinase 1		0.79325	0.081927	39	39	39	86.6	86.6	86.6	44.55	0	323.31	75551000000	3400	30.9438	31.1141	30.9655	30.9999	30.8276	30.9088	30.8249	30.8524	30.8384	30.83	30.9923		P09411	PGK1_MOUSE	Pgk1	Phosphoglycerate kinase 1
P09470	ACE_MOUSE	Ace	Angiotensin-converting enzyme		0.107154	0.0484876	26	26	26	29.3	29.3	29.3	150.92	0	323.31	2299100000	372	26.1452	26.1066	25.8777	26.3386	25.9595	26.1761	26.705	26.3373	25.8749	26.2671	26.5699		P09470	ACE_MOUSE	Ace	Angiotensin-converting enzyme
P09528	FRIH_MOUSE	Fth1	Ferritin heavy chain		2.33816	0.666016	12	12	12	56.6	56.6	56.6	21.066	0	59.231	659660000	120	24.6956	25.1295	24.7648	24.9632	24.2777	25.2698	25.5029	24.1968	24.1033	24.8167	24.6702		P09528	FRIH_MOUSE	Fth1	Ferritin heavy chain
P09671	SODM_MOUSE	Sod2	Superoxide dismutase [Mn], mitochondrial		0.487247	0.113444	14	14	14	80.6	80.6	80.6	24.603	0	323.31	8315500000	519	28.4639	28.4061	28.8027	28.7211	28.436	28.7508	28.8019	28.8491	28.3742	28.7579	28.6175		P09671	SODM_MOUSE	Sod2	Superoxide dismutase [Mn], mitochondrial
A0A0R4IZW5	A0A0R4IZW5_MOUSE	Cdh1	Cadherin-1		0.902772	0.0746264	21	21	21	34.6	34.6	34.6	98.283	0	171.81	1070200000	240	24.7745	24.9137	24.8105	24.9901	24.9522	24.9068	24.9153	24.8488	24.7236	24.8244	24.8724		A0A0R4IZW5	A0A0R4IZW5_MOUSE	Cdh1	Cadherin-1
P09813	APOA2_MOUSE	Apoa2	Apolipoprotein A-II		1.0311	-0.452346	2	2	2	18.6	18.6	18.6	11.309	0	72.352	7756700000	234	28.3465	27.6858	27.9277	28.0237	27.6457	27.896	28.0128	28.9802	28.647	28.6979	27.8519		P09813	APOA2_MOUSE	Apoa2	Apolipoprotein A-II
A0A0A6YVR9	A0A0A6YVR9_MOUSE	Surf1	SURF1-like protein (Fragment)		0.341507	0.21066	6	6	6	35	35	35	27.146	0	25.172	120350000	43	NaN	23.4022	24.1277	24.5406	24.0309	24.6529	24.3158	24.2751	23.8836	NaN	23.7992		A0A0A6YVR9	A0A0A6YVR9_MOUSE	Surf1	SURF1-like protein (Fragment)
B1AZ42	B1AZ42_MOUSE	Chmp6	Charged multivesicular body protein 6 (Fragment)		0.267226	-0.117788	2	2	2	32.1	32.1	32.1	9.032	0	19.472	54095000	18	21.6664	21.9825	21.5728	21.7883	21.9263	NaN	21.3233	NaN	NaN	NaN	21.7608		B1AZ42	B1AZ42_MOUSE	Chmp6	Charged multivesicular body protein 6 (Fragment)
Q3THW5	H2AV_MOUSE	H2az2	Histone H2A.V		0.397949	-0.296546	6	4	4	53.9	46.9	46.9	13.509	0	45.388	466030000	65	25.3532	26.1074	24.6336	25.2352	25.7734	24.8089	25.8995	25.4835	26.5143	25.3586	25.3177		Q3THW5	H2AV_MOUSE	H2az2	Histone H2A.V
F8WIA3	F8WIA3_MOUSE	Gm20604	Predicted gene 20604		0	NaN	1	1	1	28	28	28	7.8946	0.0002805	8.3006	6894800	2	NaN	NaN	NaN	NaN	NaN	NaN	NaN	NaN	NaN	NaN	NaN		F8WIA3	F8WIA3_MOUSE	Gm20604	Predicted gene 20604
S4R191	S4R191_MOUSE	Smim1	Small integral membrane protein 1 (Fragment)		0	NaN	1	1	1	50	50	50	2.7899	0.0066845	3.3058	54762000	11	NaN	NaN	NaN	NaN	NaN	NaN	NaN	NaN	NaN	NaN	NaN		S4R191	S4R191_MOUSE	Smim1	Small integral membrane protein 1 (Fragment)
P0DN34	NDUB1_MOUSE	Ndufb1	NADH dehydrogenase [ubiquinone] 1 beta subcomplex subunit 1		0.53779	-0.090877	6	6	6	77.2	77.2	77.2	6.954	0	65.302	2419800000	172	26.7361	26.9277	26.7427	26.5963	26.7535	26.6996	26.6857	26.9702	27.0282	26.682	26.7576		P0DN34	NDUB1_MOUSE	Ndufb1	NADH dehydrogenase [ubiquinone] 1 beta subcomplex subunit 1
P0DOV1	IFI5B_MOUSE	Mnda	Interferon-activable protein 205-B		0.0509753	0.0238124	8	4	0	25.4	12	0	46.977	0	16.249	136980000	33	24.351	24.1549	24.1025	24.3704	24.3012	24.6003	24.7669	24.0488	24.35	24.8643	24.3357		P0DOV1	IFI5B_MOUSE	Mnda	Interferon-activable protein 205-B
P0DOV2	IFI4_MOUSE	Ifi204	Interferon-activable protein 204		0.385089	-0.263507	9	9	3	20	20	5.8	69.437	0	25.451	176720000	47	23.9936	23.4502	23.4241	23.4408	23.3729	23.8554	24.8068	23.8045	24.3015	24.4874	24.3937		P0DOV2	IFI4_MOUSE	Ifi204	Interferon-activable protein 204
P0DP28	CALM3_MOUSE	Calm3	Calmodulin-3		0.0593614	0.0170492	16	16	15	93.3	93.3	88.6	16.837	0	323.31	19515000000	1169	27.8673	27.9166	27.7035	27.7448	27.6049	27.6643	27.9647	27.6642	28.1356	27.6862	27.7324		P0DP28	CALM3_MOUSE	Calm3	Calmodulin-3
P0DPE0	EFMT4_MOUSE	Eef1akmt4	EEF1A lysine methyltransferase 4		0	-0.0622644	2	2	2	9.4	9.4	9.4	28.531	0.0052202	3.5246	20075000	13	NaN	NaN	NaN	NaN	NaN	NaN	23.1264	22.9377	NaN	23.4396	NaN		P0DPE0	EFMT4_MOUSE	Eef1akmt4	EEF1A lysine methyltransferase 4
P10107	ANXA1_MOUSE	Anxa1	Annexin A1		1.72516	0.509401	34	34	34	78.6	78.6	78.6	38.734	0	323.31	10801000000	1212	27.4771	28.2176	27.4193	28.1236	27.3457	27.7714	28.055	26.9146	27.4428	27.5935	27.6742		P10107	ANXA1_MOUSE	Anxa1	Annexin A1
P10126	EF1A1_MOUSE	Eef1a1	Elongation factor 1-alpha 1		0.0498214	0.00639191	43	43	23	78.1	78.1	50.9	50.113	0	323.31	382190000000	13298	32.6857	32.5777	32.7108	32.7272	32.6556	32.6009	32.5657	32.6217	32.5021	32.6036	32.7118		P10126	EF1A1_MOUSE	Eef1a1	Elongation factor 1-alpha 1
P10404	ENV1_MOUSE	1 SV=3	MLV-related proviral Env polyprotein		0.740694	-0.51917	20	20	18	38.4	38.4	37.1	69.612	0	323.31	8848700000	595	27.8737	27.0769	27.9534	27.2516	28.377	26.8994	27.618	28.0763	26.5236	28.0005	28.4232		P10404	ENV1_MOUSE	1 SV=3	MLV-related proviral Env polyprotein
P10493	NID1_MOUSE	Nid1	Nidogen-1		1.24101	-0.214245	31	31	31	33.3	33.3	33.3	136.54	0	218.65	1419400000	257	25.7607	25.6396	25.8406	25.7274	25.9837	26.0302	25.6747	25.966	26.206	26.1637	25.9003		P10493	NID1_MOUSE	Nid1	Nidogen-1
P10518	HEM2_MOUSE	Alad	Delta-aminolevulinic acid dehydratase		0.179057	-0.0404488	16	16	16	63.9	63.9	63.9	36.023	0	177.58	2093300000	288	27.5704	27.4169	27.6302	27.5942	27.4085	27.468	27.698	27.5091	27.9111	27.6016	27.6107		P10518	HEM2_MOUSE	Alad	Delta-aminolevulinic acid dehydratase
P10598	CASB_MOUSE	Csn2	Beta-casein		0.0909985	0.0659688	6	6	1	29	29	11.3	25.337	0	323.31	318490000000	7701	32.847	32.6238	32.2593	32.9986	32.6984	32.8024	33.3096	33.1256	31.8031	32.9825	32.9401		P10598	CASB_MOUSE	Csn2	Beta-casein
P10605	CATB_MOUSE	Ctsb	Cathepsin B		0.165746	0.0436556	22	22	22	62.8	62.8	62.8	37.279	0	323.31	22041000000	1420	28.1422	28.1109	28.2275	28.2885	28.4026	28.1578	28.4305	28.166	27.9754	28.0334	28.4765		P10605	CATB_MOUSE	Ctsb	Cathepsin B
P10630	IF4A2_MOUSE	Eif4a2	Eukaryotic initiation factor 4A-II		0.864032	-0.104317	29	15	15	58.7	30.7	30.7	46.402	0	323.31	3373700000	311	25.8057	25.7655	25.9351	25.7079	25.8398	25.5589	25.7895	25.9479	25.8062	25.9441	25.7906		P10630	IF4A2_MOUSE	Eif4a2	Eukaryotic initiation factor 4A-II
P10639	THIO_MOUSE	Txn	Thioredoxin		0.0303492	-0.0151298	9	9	9	66.7	66.7	66.7	11.675	0	279.15	9436000000	665	28.8582	28.3615	28.54	28.125	27.9876	28.684	28.4114	28.2069	28.6899	28.634	28.2606		P10639	THIO_MOUSE	Txn	Thioredoxin
P10649	GSTM1_MOUSE	Gstm1	Glutathione S-transferase Mu 1		0.0625836	0.0237528	21	21	7	75.7	75.7	25.7	25.97	0	323.31	11957000000	893	28.4171	28.587	28.3026	28.2529	28.2721	27.8435	28.1656	28.1146	28.2645	27.8837	28.2874		P10649	GSTM1_MOUSE	Gstm1	Glutathione S-transferase Mu 1
P10711	TCEA1_MOUSE	Tcea1	Transcription elongation factor A protein 1		0.499188	0.0927377	13	13	13	47.2	47.2	47.2	33.88	0	97.618	527630000	111	23.6191	23.8201	23.6768	23.7996	23.389	23.6965	23.8957	23.6936	23.9011	23.812	23.6951		P10711	TCEA1_MOUSE	Tcea1	Transcription elongation factor A protein 1
P10810	CD14_MOUSE	Cd14	Monocyte differentiation antigen CD14		0.546177	0.402333	15	15	15	54.1	54.1	54.1	39.203	0	310.02	3993100000	409	27.0812	26.8551	26.7015	27.4038	26.8634	26.7888	27.7724	26.4675	25.5543	26.7294	27.5162		P10810	CD14_MOUSE	Cd14	Monocyte differentiation antigen CD14
P10833	RRAS_MOUSE	Rras	Ras-related protein R-Ras		0.22482	-0.0357916	12	12	10	55	55	50	23.764	0	51.552	925560000	165	24.9064	24.8765	25.1181	25.025	25.0576	24.8533	24.9354	24.846	25.1297	24.9884	25.0566		P10833	RRAS_MOUSE	Rras	Ras-related protein R-Ras
P10852	4F2_MOUSE	Slc3a2	4F2 cell-surface antigen heavy chain		0.248209	-0.0569834	27	27	27	58.2	58.2	58.2	58.336	0	323.31	10024000000	837	28.5998	28.5754	28.5161	28.5799	28.5533	28.5163	28.5392	28.7033	28.8145	28.724	28.2193		P10852	4F2_MOUSE	Slc3a2	4F2 cell-surface antigen heavy chain
Q8CGP2	H2B1P_MOUSE	Hist1h2bp	Histone H2B type 1-P		0.140974	-0.0838195	7	7	7	43.7	43.7	43.7	13.992	0	251.64	15598000000	642	29.2291	29.8756	28.6769	29.088	29.0875	29.1811	29.2913	29.1017	29.9067	29.0599	29.4535		Q8CGP2	H2B1P_MOUSE	Hist1h2bp	Histone H2B type 1-P
P10922	H10_MOUSE	H1-0	Histone H1.0		0	NaN	4	4	4	18	18	18	20.861	0	13.844	50846000	11	NaN	NaN	NaN	NaN	NaN	NaN	NaN	NaN	NaN	NaN	NaN		P10922	H10_MOUSE	H1-0	Histone H1.0
P10923	OSTP_MOUSE	Spp1	Osteopontin		0	1.24754	9	9	9	47.6	47.6	47.6	32.459	0	323.31	580470000	73	25.0134	26.3716	24.9727	26.81	NaN	27.2874	25.8631	NaN	NaN	NaN	NaN		P10923	OSTP_MOUSE	Spp1	Osteopontin
P11031	TCP4_MOUSE	Sub1	Activated RNA polymerase II transcriptional coactivator p15		1.82752	-0.127339	7	7	7	43.3	43.3	43.3	14.427	0	50.275	1650100000	136	25.6382	25.3375	25.484	25.3853	25.5164	25.479	25.5547	25.5788	25.6178	25.5067	25.5946		P11031	TCP4_MOUSE	Sub1	Activated RNA polymerase II transcriptional coactivator p15
P11087	CO1A1_MOUSE	Col1a1	Collagen alpha-1(I) chain		0.0282859	0.012395	10	10	10	8.1	8.1	8.1	138.03	0	159.22	1865600000	106	26.3696	26.3859	26.3247	26.6102	26.3282	26.2307	26.7234	26.1926	26.9828	26.2826	26.4998		P11087	CO1A1_MOUSE	Col1a1	Collagen alpha-1(I) chain
P11152	LIPL_MOUSE	Lpl	Lipoprotein lipase		0.468132	0.120491	12	12	12	38	38	38	53.109	0	323.31	1917100000	278	25.4019	25.4519	25.7632	25.9765	25.8145	25.7426	25.8021	25.914	25.4609	25.6519	25.5174		P11152	LIPL_MOUSE	Lpl	Lipoprotein lipase
P11247	PERM_MOUSE	Mpo	Myeloperoxidase		0.576072	1.10578	20	20	17	30.5	30.5	26.3	81.181	0	50.435	418840000	95	23.7139	25.3303	23.0182	22.838	22.9431	24.1409	26.4383	21.6423	21.744	23.6317	25.8092		P11247	PERM_MOUSE	Mpo	Myeloperoxidase
B7ZNJ1	B7ZNJ1_MOUSE	Fn1	Fibronectin		0.790039	-0.213109	20	20	20	14.7	14.7	14.7	239.72	0	151.85	1091900000	192	26.7622	26.1032	26.6834	26.7247	26.6404	26.768	26.6181	26.7614	27.1323	26.5942	26.8649		B7ZNJ1	B7ZNJ1_MOUSE	Fn1	Fibronectin
P11352	GPX1_MOUSE	Gpx1	Glutathione peroxidase 1		0.0455974	0.0106888	16	16	16	80.6	80.6	80.6	22.329	0	312.88	13859000000	905	29.4887	29.4101	29.5975	29.2328	29.4972	29.6348	29.3952	29.497	29.4219	29.5269	29.2286		P11352	GPX1_MOUSE	Gpx1	Glutathione peroxidase 1
P11404	FABPH_MOUSE	Fabp3	Fatty acid-binding protein, heart		0.264235	0.113798	22	22	22	98.5	98.5	98.5	14.819	0	323.31	946500000000	10632	35.1584	35.0412	34.9427	35.3113	34.9189	35.1749	34.7118	35.1721	34.2481	35.014	35.0239		P11404	FABPH_MOUSE	Fabp3	Fatty acid-binding protein, heart
P11438	LAMP1_MOUSE	Lamp1	Lysosome-associated membrane glycoprotein 1		0.00488818	-0.00332565	2	2	2	5.7	5.7	5.7	43.865	0.0014767	4.8509	158590000	22	23.1224	23.0686	23.3126	22.6713	22.9815	22.7052	22.6118	22.6088	22.3165	NaN	23.3569		P11438	LAMP1_MOUSE	Lamp1	Lysosome-associated membrane glycoprotein 1
D3Z2T9	D3Z2T9_MOUSE	Cdk1	Cyclin-dependent kinase 1 (Fragment)		0.657082	0.181911	2	1	1	8.5	4.5	4.5	22.893	0.0026116	4.1918	32299000000	235	29.5931	29.2439	29.6243	29.4993	29.5112	29.797	29.6117	29.2957	28.9207	29.5247	29.3945		D3Z2T9	D3Z2T9_MOUSE	Cdk1	Cyclin-dependent kinase 1 (Fragment)
P11499	HS90B_MOUSE	Hsp90ab1	Heat shock protein HSP 90-beta		0.0510148	0.00679919	82	82	60	78.7	78.7	71.4	83.28	0	323.31	189570000000	7764	32.0534	32.1942	32.1113	32.1747	31.9932	32.1357	32.1275	32.1542	32.2432	32.2389	32.1685		P11499	HS90B_MOUSE	Hsp90ab1	Heat shock protein HSP 90-beta
P11531	DMD_MOUSE	Dmd	Dystrophin		0.531325	-0.17163	12	10	4	3.7	3.2	1.3	425.83	0	20.339	289380000	67	25.0719	24.6964	25.2505	24.7857	25.0729	25.2104	24.9324	25.4427	25.2965	25.2906	24.7058		P11531	DMD_MOUSE	Dmd	Dystrophin
P11672	NGAL_MOUSE	Lcn2	Neutrophil gelatinase-associated lipocalin		1.18476	0.525277	12	12	12	42.5	42.5	42.5	22.875	0	96.174	3306400000	289	27.0056	27.5538	27.4898	27.7969	27.4891	27.6096	28.5118	26.7424	27.0701	27.4049	27.8905		P11672	NGAL_MOUSE	Lcn2	Neutrophil gelatinase-associated lipocalin
P11680	PROP_MOUSE	Cfp	Properdin		0.339318	0.225764	3	3	3	10.8	10.8	10.8	50.327	0.0010347	5.9762	74882000	23	NaN	NaN	21.2006	21.8669	21.53	21.961	NaN	21.9188	21.4957	21.4397	20.8677		P11680	PROP_MOUSE	Cfp	Properdin
P11688	ITA5_MOUSE	Itga5	Integrin alpha-5		0	0.168362	4	4	4	5	5	5	115.04	0.0037497	3.987	88543000	11	NaN	NaN	23.063	NaN	22.8946	NaN	NaN	NaN	NaN	NaN	NaN		P11688	ITA5_MOUSE	Itga5	Integrin alpha-5
M0QWA7	M0QWA7_MOUSE	Itgb2	Integrin beta		0.376048	0.276799	9	9	9	24.2	24.2	24.2	53.042	0	111.57	241510000	57	23.0577	23.2158	NaN	22.933	22.7184	22.8767	23.842	22.3376	NaN	22.8652	23.7214		M0QWA7	M0QWA7_MOUSE	Itgb2	Integrin beta
P11881	ITPR1_MOUSE	Itpr1	Inositol 1,4,5-trisphosphate receptor type 1		1.54063	-0.380141	19	12	12	8.3	5.9	5.9	313.16	0	66.269	180730000	62	24.2255	23.8303	23.6926	24.3075	24.7404	23.8729	23.8133	24.1122	24.2644	24.3196	24.0387		P11881	ITPR1_MOUSE	Itpr1	Inositol 1,4,5-trisphosphate receptor type 1
P11928	OAS1A_MOUSE	Oas1a	2-5-oligoadenylate synthase 1A		0	NaN	5	5	5	23.2	23.2	23.2	42.428	0.0002886	9.3477	39488000	10	NaN	NaN	NaN	NaN	NaN	NaN	NaN	NaN	NaN	NaN	NaN		P11928	OAS1A_MOUSE	Oas1a	2-5-oligoadenylate synthase 1A
P11930	NUD19_MOUSE	Nudt19	Nucleoside diphosphate-linked moiety X motif 19		0.0240717	0.0106693	5	5	5	21.3	21.3	21.3	40.32	0.00029967	10.672	81935000	29	NaN	23.3958	23.7624	23.6999	NaN	23.554	23.9043	23.5886	NaN	NaN	23.7166		P11930	NUD19_MOUSE	Nudt19	Nucleoside diphosphate-linked moiety X motif 19
P11983	TCPA_MOUSE	Tcp1	T-complex protein 1 subunit alpha		0.980183	0.0786854	38	38	38	74.5	74.5	74.5	60.448	0	323.31	11549000000	1270	27.8348	27.8754	27.9076	27.8647	27.761	27.811	27.7726	27.6055	27.7781	27.8126	27.8135		P11983	TCPA_MOUSE	Tcp1	T-complex protein 1 subunit alpha
A0A2I3BR03	A0A2I3BR03_MOUSE	App	ABPP		0	NaN	4	4	4	8.8	8.8	8.8	65.965	0	12.377	116790000	16	NaN	23.7007	NaN	NaN	NaN	23.7695	23.4998	NaN	NaN	NaN	NaN		A0A2I3BR03	A0A2I3BR03_MOUSE	App	ABPP
P12032	TIMP1_MOUSE	Timp1	Metalloproteinase inhibitor 1		0	0.392908	3	3	3	15.6	15.6	15.6	22.628	0.0037436	3.9636	41795000	10	NaN	NaN	NaN	23.1427	NaN	NaN	NaN	NaN	NaN	NaN	22.7498		P12032	TIMP1_MOUSE	Timp1	Metalloproteinase inhibitor 1
P12246	SAMP_MOUSE	Apcs	Serum amyloid P-component		0.474335	-0.190484	5	5	5	23.2	23.2	23.2	26.247	0	227.78	314200000	52	23.2235	23.1945	22.7623	23.3452	22.8383	23.2774	22.6249	23.4748	22.9445	23.3073	23.5996		P12246	SAMP_MOUSE	Apcs	Serum amyloid P-component
P12382	PFKAL_MOUSE	Pfkl	ATP-dependent 6-phosphofructokinase, liver type		0.101836	-0.0182451	46	46	41	63.6	63.6	59.9	85.359	0	323.31	35546000000	2932	29.0187	29.0267	29.1654	29.045	29.1431	28.9043	28.8553	28.9575	28.8602	29.0395	29.0866		P12382	PFKAL_MOUSE	Pfkl	ATP-dependent 6-phosphofructokinase, liver type
P12787	COX5A_MOUSE	Cox5a	Cytochrome c oxidase subunit 5A, mitochondrial		0.365022	-0.0647066	10	10	10	57.5	57.5	57.5	16.101	0	323.31	16691000000	862	28.8784	28.8924	29.2131	28.955	29.224	29.129	28.9256	29.0781	29.0742	29.1892	29.0823		P12787	COX5A_MOUSE	Cox5a	Cytochrome c oxidase subunit 5A, mitochondrial
P12815	PDCD6_MOUSE	Pdcd6	Programmed cell death protein 6		0.596603	0.117406	10	10	10	63.9	63.9	63.9	21.867	0	125.75	2428900000	251	26.3639	26.499	26.6598	26.332	26.3043	26.6784	26.637	26.2383	26.628	26.6363	26.4923		P12815	PDCD6_MOUSE	Pdcd6	Programmed cell death protein 6
P12970	RL7A_MOUSE	Rpl7a	60S ribosomal protein L7a		0.304006	-0.0461191	27	27	27	62	62	62	29.976	0	323.31	58108000000	2502	28.7662	28.6363	28.7006	28.5773	28.5598	28.8021	28.702	28.8453	28.6326	28.8774	28.6975		P12970	RL7A_MOUSE	Rpl7a	60S ribosomal protein L7a
P13011	SCD2_MOUSE	Scd2	Stearoyl-CoA desaturase 2		1.75386	0.443206	9	3	3	29.1	21.5	21.5	40.916	0	44.73	649400000	33	25.1061	24.9831	25.4878	25.3853	24.8786	25.4102	25.2274	24.5094	25.2675	24.724	24.6477		P13011	SCD2_MOUSE	Scd2	Stearoyl-CoA desaturase 2
P13020	GELS_MOUSE	Gsn	Gelsolin		0.0750295	-0.0197318	28	28	21	49.2	49.2	36.7	85.941	0	323.31	8716800000	768	26.7455	26.6713	26.5761	26.6479	26.6249	26.7085	26.8545	26.537	27.0631	26.5713	26.7265		P13020	GELS_MOUSE	Gsn	Gelsolin
P13412	TNNI2_MOUSE	Tnni2	Troponin I, fast skeletal muscle		1.95212	-0.190586	5	5	5	28.6	28.6	28.6	21.357	0.00055249	7.7887	269360000	27	NaN	25.1784	25.2902	25.2878	NaN	NaN	NaN	25.4022	NaN	25.4758	25.4502		P13412	TNNI2_MOUSE	Tnni2	Troponin I, fast skeletal muscle
P13439	UMPS_MOUSE	Umps	Uridine 5-monophosphate synthase		0.906558	0.291946	11	11	11	31.4	31.4	31.4	52.292	0	29.16	413750000	60	25.0964	25.5631	25.0235	25.0328	24.9254	25.1397	24.7808	24.8926	24.2702	24.881	24.8307		P13439	UMPS_MOUSE	Umps	Uridine 5-monophosphate synthase
P13516	ACOD1_MOUSE	Scd1	Acyl-CoA desaturase 1		0.528306	0.187103	13	13	7	42.3	42.3	34.6	41.046	0	237.73	9822500000	495	26.7617	27.0733	27.0405	27.2838	27.0136	27.6912	27.0506	27.333	27.3057	27.1653	26.6653		P13516	ACOD1_MOUSE	Scd1	Acyl-CoA desaturase 1
P13634	CAH1_MOUSE	Ca1	Carbonic anhydrase 1		0.627461	-0.282709	9	9	9	55.6	55.6	55.6	28.33	0	92.055	551410000	102	24.2034	24.2636	24.1086	24.2832	24.4266	23.6035	23.3366	24.1534	24.5595	23.6466	24.2215		P13634	CAH1_MOUSE	Ca1	Carbonic anhydrase 1
P13707	GPDA_MOUSE	Gpd1	Glycerol-3-phosphate dehydrogenase [NAD(+)], cytoplasmic		0.303427	-0.045476	35	35	33	91.1	91.1	86	37.572	0	323.31	64035000000	3366	29.8414	29.9045	29.9362	29.7883	29.8389	29.8688	29.7813	29.9987	29.8825	29.7442	30.1021		P13707	GPDA_MOUSE	Gpd1	Glycerol-3-phosphate dehydrogenase [NAD(+)], cytoplasmic
P13864	DNMT1_MOUSE	Dnmt1	DNA (cytosine-5)-methyltransferase 1		0.217189	0.132284	11	11	11	8	8	8	183.19	0	19.941	165560000	44	23.9732	23.8711	23.7374	24.5702	23.4458	23.5999	24.4664	23.5074	24.4375	23.9631	24.1732		P13864	DNMT1_MOUSE	Dnmt1	DNA (cytosine-5)-methyltransferase 1
P14069	S10A6_MOUSE	S100a6	Protein S100-A6		0.0480086	0.0183709	12	12	12	92.1	92.1	92.1	10.051	0	287.8	16538000000	360	30.9627	30.7393	31.1169	31.3819	31.3066	31.07	31.5057	31.0305	31.1261	31.2999	31.1407		P14069	S10A6_MOUSE	S100a6	Protein S100-A6
P14094	AT1B1_MOUSE	Atp1b1	Sodium/potassium-transporting ATPase subunit beta-1		0	NaN	5	5	5	21.4	21.4	21.4	35.194	0.00028802	9.2983	38122000	5	NaN	NaN	NaN	NaN	NaN	NaN	NaN	NaN	NaN	NaN	NaN		P14094	AT1B1_MOUSE	Atp1b1	Sodium/potassium-transporting ATPase subunit beta-1
P14106	C1QB_MOUSE	C1qb	Complement C1q subcomponent subunit B		0.0976959	-0.0662428	3	3	3	15.4	15.4	15.4	26.717	0	73.077	147250000	37	23.3964	23.0172	23.3298	23.5203	23.5165	24.1213	24.2241	23.4732	23.7823	23.8556	24.2286		P14106	C1QB_MOUSE	C1qb	Complement C1q subcomponent subunit B
P14115	RL27A_MOUSE	Rpl27a	60S ribosomal protein L27a		0.954739	-0.126307	9	9	9	33.1	33.1	33.1	16.605	0	323.31	23974000000	967	28.8938	28.8901	28.873	28.7787	29.0768	29.0052	28.9388	28.8999	29.1763	29.1846	28.9093		P14115	RL27A_MOUSE	Rpl27a	60S ribosomal protein L27a
P14131	RS16_MOUSE	Rps16	40S ribosomal protein S16		0.176354	-0.0291676	17	17	17	61	61	61	16.445	0	323.31	51820000000	1726	30.2106	30.1269	30.1715	29.9761	30.0202	30.0957	30.1665	30.2633	29.972	30.2613	30.0918		P14131	RS16_MOUSE	Rps16	40S ribosomal protein S16
J3QK17	J3QK17_MOUSE	Slc2a4	Glucose transporter type 4, insulin-responsive		0	NaN	2	2	2	6.7	6.7	6.7	50.821	0.0072623	3.148	51121000	9	NaN	NaN	NaN	NaN	NaN	NaN	NaN	NaN	NaN	NaN	NaN		J3QK17	J3QK17_MOUSE	Slc2a4	Glucose transporter type 4, insulin-responsive
P14148	RL7_MOUSE	Rpl7	60S ribosomal protein L7		0.16827	-0.0318143	28	28	28	60.4	60.4	60.4	31.419	0	323.31	73358000000	2768	31.5231	31.4659	31.6293	31.3402	31.3142	31.5544	31.4974	31.6487	31.686	31.5385	31.4649		P14148	RL7_MOUSE	Rpl7	60S ribosomal protein L7
P14152	MDHC_MOUSE	Mdh1	Malate dehydrogenase, cytoplasmic		0.442348	-0.0705508	18	18	18	49.4	49.4	49.4	36.511	0	323.31	72612000000	2120	30.142	30.2476	30.0096	30.0766	30.3511	30.0182	30.0473	30.0322	29.9676	30.2186	30.191		P14152	MDHC_MOUSE	Mdh1	Malate dehydrogenase, cytoplasmic
P14206	RSSA_MOUSE	Rpsa	40S ribosomal protein SA		1.22524	-0.110298	24	24	24	66.8	66.8	66.8	32.838	0	323.31	60768000000	2858	32.197	32.0088	32.0796	31.9983	32.0665	32.1555	32.0753	32.1341	32.3388	32.2101	32.0963		P14206	RSSA_MOUSE	Rpsa	40S ribosomal protein SA
P14211	CALR_MOUSE	Calr	Calreticulin		0.679671	-0.0605425	35	35	35	85.1	85.1	85.1	47.994	0	323.31	76990000000	3290	29.3157	29.1727	29.2973	29.2839	29.1687	29.1344	29.2539	29.3236	29.3916	29.2879	29.2464		P14211	CALR_MOUSE	Calr	Calreticulin
P14483	HB2A_MOUSE	H2-Ab1	H-2 class II histocompatibility antigen, A beta chain		0.76386	-0.257853	6	6	6	29.4	29.4	29.4	30.128	0.00028466	8.7861	75609000	29	21.4049	21.0216	21.1341	20.6163	21.4118	21.0373	21.6779	NaN	21.3655	21.3013	21.2928		P14483	HB2A_MOUSE	H2-Ab1	H-2 class II histocompatibility antigen, A beta chain
P14576	SRP54_MOUSE	Srp54	Signal recognition particle 54 kDa protein		0.0754519	-0.0164593	31	31	31	62.5	62.5	62.5	55.72	0	323.31	4403400000	776	25.6503	25.6603	25.6577	25.5398	25.6978	25.4191	25.3761	25.5904	25.5655	25.3975	25.3808		P14576	SRP54_MOUSE	Srp54	Signal recognition particle 54 kDa protein
P14602	HSPB1_MOUSE	Hspb1	Heat shock protein beta-1		1.64533	0.22004	15	15	15	81.8	81.8	81.8	23.014	0	323.31	8625200000	523	28.2252	28.287	28.4002	28.5794	28.0053	28.5725	28.4619	28.1878	28.3059	28.2998	28.4168		P14602	HSPB1_MOUSE	Hspb1	Heat shock protein beta-1
P14685	PSMD3_MOUSE	Psmd3	26S proteasome non-ATPase regulatory subunit 3		1.57394	0.0963612	35	35	35	60.8	60.8	60.8	60.718	0	323.31	9486200000	1037	27.0501	27.2537	27.1879	27.1378	26.9651	27.0953	27.115	27.0537	27.1121	27.0615	27.1269		P14685	PSMD3_MOUSE	Psmd3	26S proteasome non-ATPase regulatory subunit 3
P14733	LMNB1_MOUSE	Lmnb1	Lamin-B1		0.0506617	-0.0248111	18	18	17	32.7	32.7	31.1	66.785	0	48.421	479100000	99	23.4136	23.5167	22.8481	23.0108	23.0891	23.1271	23.6364	23.1312	23.603	23.3362	22.9427		P14733	LMNB1_MOUSE	Lmnb1	Lamin-B1
P14847	CRP_MOUSE	Crp	C-reactive protein		0	NaN	5	5	5	34.2	34.2	34.2	25.36	0.00028969	9.4376	19429000	11	NaN	NaN	NaN	NaN	NaN	NaN	NaN	NaN	NaN	NaN	NaN		P14847	CRP_MOUSE	Crp	C-reactive protein
P14869	RLA0_MOUSE	Rplp0	60S acidic ribosomal protein P0		0.919114	-0.114631	25	25	25	68.1	68.1	68.1	34.216	0	323.31	32308000000	1831	29.9781	29.9673	29.7528	29.7234	29.843	29.7752	29.6851	30.0492	29.7276	29.8904	29.884		P14869	RLA0_MOUSE	Rplp0	60S acidic ribosomal protein P0
P14873	MAP1B_MOUSE	Map1b	Microtubule-associated protein 1B		0.21694	0.209396	20	20	20	13.1	13.1	13.1	270.25	0	86.602	258840000	73	23.6139	24.1659	23.6437	24.0992	23.2521	24.2238	22.5989	NaN	NaN	24.0803	23.2013		P14873	MAP1B_MOUSE	Map1b	Microtubule-associated protein 1B
P14901	HMOX1_MOUSE	Hmox1	Heme oxygenase 1		0.815538	0.366394	7	7	7	31.5	31.5	31.5	32.928	0	26.808	447340000	72	22.6342	23.1419	23.5571	23.7059	23.0885	23.4073	23.0561	22.2987	23.301	23.1753	23.5457		P14901	HMOX1_MOUSE	Hmox1	Heme oxygenase 1
P15089	CBPA3_MOUSE	Cpa3	Mast cell carboxypeptidase A		0	NaN	3	3	3	9.4	9.4	9.4	48.789	0.0023952	4.3382	22036000	5	NaN	NaN	NaN	NaN	NaN	NaN	NaN	NaN	NaN	NaN	NaN		P15089	CBPA3_MOUSE	Cpa3	Mast cell carboxypeptidase A
P15105	GLNA_MOUSE	Glul	Glutamine synthetase		2.0744	-0.542572	19	19	19	54.2	54.2	54.2	42.119	0	323.31	11435000000	961	27.2096	27.0357	26.7307	26.5871	27.3599	27.3093	27.2204	27.5691	27.7165	27.8144	27.4456		P15105	GLNA_MOUSE	Glul	Glutamine synthetase
P15208	INSR_MOUSE	Insr	Insulin receptor		0	NaN	4	4	4	4.1	4.1	4.1	155.61	0.004387	3.7671	15278000	9	NaN	NaN	NaN	NaN	NaN	NaN	NaN	NaN	NaN	NaN	NaN		P15208	INSR_MOUSE	Insr	Insulin receptor
P15327	PMGE_MOUSE	Bpgm	Bisphosphoglycerate mutase		0.433561	-0.148102	13	13	13	53.3	53.3	53.3	29.978	0	51.722	714910000	123	25.1239	25.1874	25.3994	25.0502	25.6745	25.3527	25.5286	25.2295	25.937	25.3165	25.4291		P15327	PMGE_MOUSE	Bpgm	Bisphosphoglycerate mutase
Q3U8S1	Q3U8S1_MOUSE	Cd44	CD44 antigen		0.143782	0.0902706	3	3	3	9.3	9.3	9.3	40.263	0.0010384	6.047	328010000	37	NaN	23.4925	23.5054	23.8756	22.9161	23.8612	23.5051	23.634	23.181	24.0388	24.0185		Q3U8S1	Q3U8S1_MOUSE	Cd44	CD44 antigen
P15532	NDKA_MOUSE	Nme1	Nucleoside diphosphate kinase A		0.565756	-0.248031	15	4	4	86.2	25	25	17.208	0	109.14	683640000	134	24.9364	24.0248	23.9604	24.7078	24.6154	25.0768	24.4323	24.6583	24.9262	24.6085	24.3859		P15532	NDKA_MOUSE	Nme1	Nucleoside diphosphate kinase A
P15535	B4GT1_MOUSE	B4galt1	Beta-1,4-galactosyltransferase 1		1.80193	-0.292217	17	17	17	46.1	46.1	46.1	44.411	0	323.31	6030500000	541	28.6644	28.5436	28.7039	28.6151	28.9459	28.3258	28.5409	28.7769	29.1493	28.7616	28.7303		P15535	B4GT1_MOUSE	B4galt1	Beta-1,4-galactosyltransferase 1
P15626	GSTM2_MOUSE	Gstm2	Glutathione S-transferase Mu 2		0.564043	-0.194285	18	14	10	71.1	54.6	44.5	25.716	0	37.377	1580100000	212	25.415	25.8259	25.3437	25.3628	25.4151	25.1004	24.8688	25.425	25.8694	25.4567	25.3864		P15626	GSTM2_MOUSE	Gstm2	Glutathione S-transferase Mu 2
P15864	H12_MOUSE	H1-2	Histone H1.2		0.203053	0.0875655	13	13	4	32.5	32.5	13.2	21.266	0	93.423	14378000000	530	27.7968	27.8817	27.487	27.4827	27.1345	27.922	28.111	27.6586	27.9853	27.7426	27.8181		P15864	H12_MOUSE	H1-2	Histone H1.2
P15920	VPP2_MOUSE	Atp6v0a2	V-type proton ATPase 116 kDa subunit a2		0.577872	0.210235	8	7	7	11.2	10.3	10.3	98.144	0	15.018	181260000	49	23.9643	23.9608	24.3244	24.0173	23.8195	23.6316	23.8622	23.9496	23.8701	23.1126	23.778		P15920	VPP2_MOUSE	Atp6v0a2	V-type proton ATPase 116 kDa subunit a2
P16015	CAH3_MOUSE	Ca3	Carbonic anhydrase 3		0.35387	-0.0944221	27	27	27	91.5	91.5	91.5	29.366	0	323.31	170350000000	4819	31.8856	32.0929	31.6313	32.0066	31.9742	31.4528	31.7982	31.7094	31.8404	31.9048	32.0303		P16015	CAH3_MOUSE	Ca3	Carbonic anhydrase 3
P16045	LEG1_MOUSE	Lgals1	Galectin-1		0.0846576	0.0234373	10	10	10	88.1	88.1	88.1	14.866	0	323.31	23994000000	753	28.2563	28.4259	28.2895	28.4185	28.3339	28.1882	28.5274	28.0415	28.5965	28.4878	28.3628		P16045	LEG1_MOUSE	Lgals1	Galectin-1
Q8C253	Q8C253_MOUSE	Lgals3	Galectin		0.32439	-0.154806	7	7	7	26.9	26.9	26.9	27.414	0	92.429	3091400000	247	26.1804	26.1463	25.6728	26.0016	25.5972	25.8567	26.4248	25.8943	26.248	26.5345	26.5969		Q8C253	Q8C253_MOUSE	Lgals3	Galectin
P16125	LDHB_MOUSE	Ldhb	L-lactate dehydrogenase B chain		1.53601	0.315823	22	19	19	72.8	68.3	68.3	36.572	0	154.74	4231600000	387	27.6296	27.811	27.8515	27.7085	27.2389	28.0464	27.57	27.811	27.2641	27.4351	27.5113		P16125	LDHB_MOUSE	Ldhb	L-lactate dehydrogenase B chain
P16254	SRP14_MOUSE	Srp14	Signal recognition particle 14 kDa protein		0.943852	-0.240576	6	6	6	43.6	43.6	43.6	12.51	0	323.31	926030000	154	25.0208	25.0393	24.7829	24.6413	25.1686	24.8188	24.8145	25.2765	24.556	25.3168	25.0211		P16254	SRP14_MOUSE	Srp14	Signal recognition particle 14 kDa protein
P16330	CN37_MOUSE	Cnp	2,3-cyclic-nucleotide 3-phosphodiesterase		0.273339	0.0732511	21	21	21	48.1	48.1	48.1	47.123	0	255.2	2588800000	318	25.4014	25.7455	25.3648	25.4488	25.0741	25.2987	25.6125	25.5432	25.5816	25.5465	25.3781		P16330	CN37_MOUSE	Cnp	2,3-cyclic-nucleotide 3-phosphodiesterase
P16332	MUTA_MOUSE	Mmut	Methylmalonyl-CoA mutase, mitochondrial		0.0218135	-0.00685819	22	22	22	46.9	46.9	46.9	82.843	0	321	2284100000	338	26.1941	26.3403	26.1863	26.2856	26.335	26.3673	26.0233	26.47	25.9504	26.4437	26.0913		P16332	MUTA_MOUSE	Mmut	Methylmalonyl-CoA mutase, mitochondrial
P16406	AMPE_MOUSE	Enpep	Glutamyl aminopeptidase		0	NaN	4	4	4	5.1	5.1	5.1	107.96	0.0019175	4.348	24240000	14	NaN	NaN	NaN	NaN	NaN	NaN	NaN	NaN	NaN	NaN	NaN		P16406	AMPE_MOUSE	Enpep	Glutamyl aminopeptidase
P16460	ASSY_MOUSE	Ass1	Argininosuccinate synthase		0.0905624	0.0208802	24	24	24	59	59	59	46.584	0	323.31	4862500000	574	26.9875	27.0768	27.294	26.7853	27.0792	27.1337	26.979	27.1434	27.0953	26.9346	26.9575		P16460	ASSY_MOUSE	Ass1	Argininosuccinate synthase
P16546	SPTN1_MOUSE	Sptan1	Spectrin alpha chain, non-erythrocytic 1		0.18542	-0.0246268	147	147	1	59.3	59.3	0.7	284.59	0	323.31	20009000000	2664	27.1582	27.227	27.1795	27.0709	27.1731	27.1602	27.0914	27.1476	27.3479	27.1666	27.0292		P16546	SPTN1_MOUSE	Sptan1	Spectrin alpha chain, non-erythrocytic 1
P16675	PPGB_MOUSE	Ctsa	Lysosomal protective protein		0.336351	0.0983353	11	11	11	27	27	27	53.844	0	118.07	2308400000	207	26.0683	25.876	26.2434	26.1296	26.046	25.9879	26.3394	26.0355	25.6035	26.0404	26.3077		P16675	PPGB_MOUSE	Ctsa	Lysosomal protective protein
P16858	G3P_MOUSE	Gapdh	Glyceraldehyde-3-phosphate dehydrogenase		0.395377	0.0661661	37	37	4	92.8	92.8	19.8	35.81	0	323.31	325460000000	7951	33.7845	33.9366	33.808	33.8117	33.7696	33.6457	33.6956	33.6624	33.4664	33.7732	33.8241		P16858	G3P_MOUSE	Gapdh	Glyceraldehyde-3-phosphate dehydrogenase
A0A0U1RPM2	A0A0U1RPM2_MOUSE	Fes	Tyrosine-protein kinase		0	-0.659915	5	5	5	10.1	10.1	10.1	93.52	0.00028353	8.6875	64584000	18	NaN	24.1831	NaN	24.0035	NaN	22.5277	NaN	NaN	24.2313	NaN	NaN		A0A0U1RPM2	A0A0U1RPM2_MOUSE	Fes	Tyrosine-protein kinase
P17047	LAMP2_MOUSE	Lamp2	Lysosome-associated membrane glycoprotein 2		0	0.935136	2	2	2	4.3	4.3	4.3	45.681	0.0045935	3.6799	190650000	28	NaN	NaN	NaN	NaN	25.3171	NaN	26.2448	25.3023	NaN	NaN	NaN		P17047	LAMP2_MOUSE	Lamp2	Lysosome-associated membrane glycoprotein 2
P17182	ENOA_MOUSE	Eno1	Alpha-enolase		0.088441	-0.0139554	49	49	44	88.5	88.5	80	47.14	0	323.31	263230000000	6926	31.5029	31.4694	31.4539	31.32	31.2671	31.2905	31.3405	31.5273	31.2948	31.3678	31.3729		P17182	ENOA_MOUSE	Eno1	Alpha-enolase
P17426	AP2A1_MOUSE	Ap2a1	AP-2 complex subunit alpha-1		0.141894	0.0300926	42	31	31	57.7	45.1	45.1	107.66	0	121.87	1213400000	286	25.3177	25.3486	25.5236	25.3942	25.4883	25.0752	25.4563	25.277	25.2377	25.261	25.3954		P17426	AP2A1_MOUSE	Ap2a1	AP-2 complex subunit alpha-1
P17427	AP2A2_MOUSE	Ap2a2	AP-2 complex subunit alpha-2		1.49293	0.108046	51	51	40	62.8	62.8	50.3	104.02	0	323.31	20291000000	1412	29.8071	29.8222	29.8105	29.8265	29.7731	29.873	29.9719	29.7139	29.6237	29.7754	29.8234		P17427	AP2A2_MOUSE	Ap2a2	AP-2 complex subunit alpha-2
P17439	GLCM_MOUSE	Gba	Lysosomal acid glucosylceramidase		0.391763	0.125574	11	11	11	25.6	25.6	25.6	57.621	0	42.96	278780000	74	23.1198	23.4747	23.4342	23.6579	23.7268	23.3412	23.547	22.9737	23.5866	23.2239	23.5616		P17439	GLCM_MOUSE	Gba	Lysosomal acid glucosylceramidase
P17563	SBP1_MOUSE	Selenbp1	Methanethiol oxidase		0.277548	0.067938	23	23	23	65.7	65.7	65.7	52.513	0	155.33	3877000000	469	27.5336	27.5841	27.4252	27.4102	27.2297	27.1243	27.551	27.3113	27.1606	27.5596	27.3112		P17563	SBP1_MOUSE	Selenbp1	Methanethiol oxidase
P17665	COX7C_MOUSE	Cox7c	Cytochrome c oxidase subunit 7C, mitochondrial		0.223467	0.164355	2	2	2	17.5	17.5	17.5	7.3325	0.0014996	5.1822	1672100000	90	25.4078	25.7741	26.1157	25.7859	25.9988	27.0863	26.4574	26.3389	25.9041	26.7571	26.0704		P17665	COX7C_MOUSE	Cox7c	Cytochrome c oxidase subunit 7C, mitochondrial
G3UVV4	G3UVV4_MOUSE	Hk1	Hexokinase		0.168998	0.0250333	50	50	43	52.7	52.7	47.7	101.87	0	323.31	11450000000	1004	27.2959	27.4528	27.4708	27.3389	27.2073	27.4354	27.3668	27.5008	27.4413	27.5043	27.3778		G3UVV4	G3UVV4_MOUSE	Hk1	Hexokinase
P17742	PPIA_MOUSE	Ppia	Peptidyl-prolyl cis-trans isomerase A		0.515465	0.131072	14	14	14	75	75	75	17.971	0	323.31	123040000000	3437	32.2899	32.2646	31.9422	32.0708	31.8521	32.3592	32.079	32.0272	31.7076	32.2302	31.9654		P17742	PPIA_MOUSE	Ppia	Peptidyl-prolyl cis-trans isomerase A
P17751	TPIS_MOUSE	Tpi1	Triosephosphate isomerase		1.05358	0.192775	23	23	23	90.8	90.8	90.8	26.712	0	323.31	54946000000	2272	30.0917	30.4062	30.4184	30.3809	30.1783	30.0415	30.0499	30.0821	29.791	30.1256	30.131		P17751	TPIS_MOUSE	Tpi1	Triosephosphate isomerase
P17809	GTR1_MOUSE	Slc2a1	Solute carrier family 2, facilitated glucose transporter member 1		0.0128256	0.00913544	4	4	4	6.1	6.1	6.1	53.984	0.00054945	7.6395	256100000	70	25.0272	24.6809	25.2822	24.4796	24.8384	25.6683	24.9806	25.2305	25.212	25.3219	24.4251		P17809	GTR1_MOUSE	Slc2a1	Solute carrier family 2, facilitated glucose transporter member 1
P17879	HS71B_MOUSE	Hspa1b	Heat shock 70 kDa protein 1B		1.0734	0.221601	34	30	22	60.3	51.7	40.3	70.175	0	323.31	7412100000	896	27.2276	27.6211	27.3082	27.4321	27.029	27.0738	27.5394	26.9319	27.2027	27.2611	27.3876		P17879	HS71B_MOUSE	Hspa1b	Heat shock 70 kDa protein 1B
P17918	PCNA_MOUSE	Pcna	Proliferating cell nuclear antigen		0.451139	-0.102741	9	9	9	37.5	37.5	37.5	28.785	0	58.687	670870000	111	24.7473	25.2025	24.846	24.8819	25.041	24.6805	24.849	24.9274	25.0901	25.2116	24.9509		P17918	PCNA_MOUSE	Pcna	Proliferating cell nuclear antigen
P18242	CATD_MOUSE	Ctsd	Cathepsin D		1.78697	0.241768	22	22	22	62.4	62.4	62.4	44.953	0	323.31	21719000000	1175	29.0776	29.346	29.3545	29.397	29.1071	29.2608	29.4671	28.9863	29.211	28.947	29.4108		P18242	CATD_MOUSE	Ctsd	Cathepsin D
A0A075B5Q9	A0A075B5Q9_MOUSE	Ighv5-15	Immunoglobulin heavy variable 5-15		0	NaN	2	1	1	23.3	13.8	13.8	12.943	0.00054825	7.5898	5624000	1	NaN	NaN	NaN	NaN	NaN	NaN	NaN	NaN	NaN	NaN	NaN		A0A075B5Q9	A0A075B5Q9_MOUSE	Ighv5-15	Immunoglobulin heavy variable 5-15
P18528	HVM57_MOUSE	4 SV=1	Ig heavy chain V region 6.96		0	NaN	2	1	1	30.6	19.4	19.4	11.007	0.0089053	2.9696	14061000	4	NaN	NaN	NaN	NaN	NaN	NaN	NaN	NaN	NaN	NaN	NaN		P18528	HVM57_MOUSE	4 SV=1	Ig heavy chain V region 6.96
J3QP71	J3QP71_MOUSE	Bsg	Basigin (Fragment)		1.24849	-0.204606	7	7	7	35.5	35.5	35.5	21.602	0	172.02	3121200000	218	26.5161	26.1918	26.4631	25.9706	26.5085	26.1978	26.3106	26.5577	26.439	26.3586	26.2085		J3QP71	J3QP71_MOUSE	Bsg	Basigin (Fragment)
A0A3B2W3M7	A0A3B2W3M7_MOUSE	Hmgn1	Non-histone chromosomal protein HMG-14		0	NaN	1	1	1	34.9	34.9	34.9	9.029	0	56.464	26295000	6	NaN	NaN	NaN	NaN	NaN	NaN	NaN	NaN	NaN	NaN	NaN		A0A3B2W3M7	A0A3B2W3M7_MOUSE	Hmgn1	Non-histone chromosomal protein HMG-14
E9PWV3	E9PWV3_MOUSE	Rps6ka1	Ribosomal protein S6 kinase		0.0259545	-0.00387389	36	36	26	57.7	57.7	45.9	81.311	0	154.52	3113400000	464	25.3764	25.539	25.4734	25.3625	25.5581	25.3793	25.3983	25.4426	25.347	25.5344	25.3476		E9PWV3	E9PWV3_MOUSE	Rps6ka1	Ribosomal protein S6 kinase
P18654	KS6A3_MOUSE	Rps6ka3	Ribosomal protein S6 kinase alpha-3		1.18224	0.210187	23	13	13	41.6	27.3	27.3	83.693	0	53.538	397470000	101	24.7427	25.001	24.6672	24.7274	24.4046	24.7373	24.9217	24.4557	24.5312	24.8854	24.5847		P18654	KS6A3_MOUSE	Rps6ka3	Ribosomal protein S6 kinase alpha-3
P18760	COF1_MOUSE	Cfl1	Cofilin-1		0.0783955	0.0181796	19	19	18	73.5	73.5	66.9	18.559	0	323.31	26371000000	1673	28.6772	28.7057	28.4981	28.5471	28.4063	28.5512	28.6293	28.5149	28.7578	28.3404	28.7119		P18760	COF1_MOUSE	Cfl1	Cofilin-1
P18761	CAH6_MOUSE	Ca6	Carbonic anhydrase 6		0	NaN	12	12	12	49.8	49.8	49.8	36.494	0	73.764	537970000	51	NaN	NaN	NaN	NaN	NaN	NaN	NaN	NaN	NaN	NaN	NaN		P18761	CAH6_MOUSE	Ca6	Carbonic anhydrase 6
A2AI91	A2AI91_MOUSE	Phka1	Phosphorylase b kinase regulatory subunit		0	NaN	2	2	2	3.6	3.6	3.6	132.32	0.0056676	3.5084	7921800	2	NaN	NaN	NaN	NaN	NaN	NaN	NaN	NaN	NaN	NaN	NaN		A2AI91	A2AI91_MOUSE	Phka1	Phosphorylase b kinase regulatory subunit
P19096	FAS_MOUSE	Fasn	Fatty acid synthase		1.38193	-0.150543	244	244	244	81.3	81.3	81.3	272.43	0	323.31	2552400000000	60330	34.2054	34.0687	34.239	34.06	34.2979	34.1497	34.0029	34.431	34.085	34.2361	34.2725		P19096	FAS_MOUSE	Fasn	Fatty acid synthase
P19137	LAMA1_MOUSE	Lama1	Laminin subunit alpha-1		0.355902	-0.775007	10	10	10	4	4	4	338.14	0.00029603	10.247	64726000	22	22.0556	NaN	21.8232	NaN	21.9662	21.9065	NaN	22.0878	24.45	NaN	NaN		P19137	LAMA1_MOUSE	Lama1	Laminin subunit alpha-1
P19157	GSTP1_MOUSE	Gstp1	Glutathione S-transferase P 1		0.249382	-0.0460536	13	13	13	66.7	66.7	66.7	23.609	0	323.31	17679000000	1199	29.8456	29.909	29.8533	29.8056	29.8771	29.7634	29.7208	29.6597	30.1304	29.8611	29.765		P19157	GSTP1_MOUSE	Gstp1	Glutathione S-transferase P 1
P19221	THRB_MOUSE	F2	Prothrombin		0.353298	-0.0689634	27	27	27	46.9	46.9	46.9	70.268	0	323.31	2905800000	373	26.5381	26.06	26.1436	26.3219	26.2996	26.3253	26.3271	26.3642	26.1315	26.1381	26.3558		P19221	THRB_MOUSE	F2	Prothrombin
P19253	RL13A_MOUSE	Rpl13a	60S ribosomal protein L13a		0.0720826	-0.0114025	15	15	15	45.8	45.8	45.8	23.464	0	323.31	18782000000	842	28.6112	28.5094	28.6546	28.3635	28.4594	28.5681	28.5345	28.5876	28.4178	28.6235	28.5249		P19253	RL13A_MOUSE	Rpl13a	60S ribosomal protein L13a
P19324	SERPH_MOUSE	Serpinh1	Serpin H1		0.539373	-0.1303	21	21	21	55.6	55.6	55.6	46.533	0	217.51	6763400000	656	27.4809	27.6136	27.4751	27.673	27.7691	27.8279	27.7314	27.5876	28.0705	27.8858	27.9733		P19324	SERPH_MOUSE	Serpinh1	Serpin H1
P19536	COX5B_MOUSE	Cox5b	Cytochrome c oxidase subunit 5B, mitochondrial		0.695646	0.165731	10	10	10	67.2	67.2	67.2	13.813	0	114	5447600000	373	27.0453	26.8664	27.3559	27.0763	26.7231	27.3907	27.0361	27.2142	26.9437	26.8532	27.0967		P19536	COX5B_MOUSE	Cox5b	Cytochrome c oxidase subunit 5B, mitochondrial
P19783	COX41_MOUSE	Cox4i1	Cytochrome c oxidase subunit 4 isoform 1, mitochondrial		0.0319712	-0.00959835	12	12	12	52.7	52.7	52.7	19.53	0	323.31	19036000000	690	28.2596	28.1518	28.378	28.2337	28.4196	28.6068	28.1968	28.5499	28.0619	28.3128	28.3343		P19783	COX41_MOUSE	Cox4i1	Cytochrome c oxidase subunit 4 isoform 1, mitochondrial
A2A6J7	A2A6J7_MOUSE	Lsp1	Lymphocyte-specific protein 1		0.0851895	0.091126	6	6	6	27.2	27.2	27.2	35.928	0	58.052	122700000	35	21.9033	21.6419	NaN	21.1694	21.2853	21.3867	22.774	21.4391	NaN	21.2969	22.3349		A2A6J7	A2A6J7_MOUSE	Lsp1	Lymphocyte-specific protein 1
P20029	BIP_MOUSE	Hspa5	Endoplasmic reticulum chaperone BiP		0.355772	0.0367158	51	49	49	61.8	61.8	61.8	72.421	0	323.31	167660000000	6902	29.8644	29.7938	29.778	29.8766	29.6593	29.865	29.8237	29.7813	29.7893	29.7293	29.9207		P20029	BIP_MOUSE	Hspa5	Endoplasmic reticulum chaperone BiP
P20060	HEXB_MOUSE	Hexb	Beta-hexosaminidase subunit beta		0.481169	0.189594	8	8	8	17.5	17.5	17.5	61.115	0	21.279	550950000	49	24.6654	25.0882	25.1788	25.2854	24.4309	24.7725	25.2685	24.8874	25.3025	24.9131	25.3753		P20060	HEXB_MOUSE	Hexb	Beta-hexosaminidase subunit beta
P20065	TYB4_MOUSE	Tmsb4x	Thymosin beta-4		0.407175	-1.03919	4	4	4	40	40	40	5.6794	0	229.62	5021400000	223	27.721	21.8164	28.3829	27.6972	27.7292	28.162	28.2086	28.0462	27.3623	27.9831	28.5139		P20065	TYB4_MOUSE	Tmsb4x	Thymosin beta-4
P20108	PRDX3_MOUSE	Prdx3	Thioredoxin-dependent peroxide reductase, mitochondrial		0.207907	0.0542951	15	15	15	66.5	66.5	66.5	28.127	0	323.31	16966000000	1122	28.2777	28.2205	28.5693	28.6118	28.5113	28.6757	28.3478	28.6062	28.2121	28.5602	28.4168		P20108	PRDX3_MOUSE	Prdx3	Thioredoxin-dependent peroxide reductase, mitochondrial
P20152	VIME_MOUSE	Vim	Vimentin		0.429774	0.109753	59	59	50	82.8	82.8	73	53.687	0	323.31	50679000000	3049	29.8112	29.9147	29.6404	29.9383	29.6312	29.5008	29.4715	29.3649	29.7067	29.454	29.5324		P20152	VIME_MOUSE	Vim	Vimentin
P20357	MTAP2_MOUSE	Map2	Microtubule-associated protein 2		0.783411	0.254431	7	7	7	5.5	5.5	5.5	199.13	0	12.985	507140000	44	23.9304	24.3567	24.6828	24.2505	23.6061	24.1453	24.1639	24.3134	23.8557	24.4227	24.2641		P20357	MTAP2_MOUSE	Map2	Microtubule-associated protein 2
P20801	TNNC2_MOUSE	Tnnc2	Troponin C, skeletal muscle		1.05752	0.824725	9	8	8	57.5	53.1	53.1	18.11	0	20.996	48470000	35	NaN	21.8858	20.7306	21.2339	20.4308	NaN	NaN	20.2142	NaN	20.7311	NaN		P20801	TNNC2_MOUSE	Tnnc2	Troponin C, skeletal muscle
P20918	PLMN_MOUSE	Plg	Plasminogen		2.43016	-0.186713	42	42	42	61.7	61.7	61.7	90.807	0	323.31	10609000000	871	28.5287	28.2666	28.1599	28.3985	28.4496	28.3213	28.2556	28.4239	28.4283	28.5799	28.3922		P20918	PLMN_MOUSE	Plg	Plasminogen
P21126	UBL4A_MOUSE	Ubl4a	Ubiquitin-like protein 4A		0.00926127	0.00284926	7	7	7	51	51	51	17.8	0	12.114	256690000	67	22.8444	22.9346	23.0359	22.9993	23.0007	22.6573	22.857	22.6883	23.221	22.8166	22.7929		P21126	UBL4A_MOUSE	Ubl4a	Ubiquitin-like protein 4A
G5E8G6	G5E8G6_MOUSE	Myo5b	Unconventional myosin-Vb		0	NaN	7	6	6	5.2	4.5	4.5	210.54	0.001289	5.8439	37746000	12	NaN	NaN	23.3525	24.2913	NaN	24.6748	NaN	NaN	NaN	NaN	NaN		G5E8G6	G5E8G6_MOUSE	Myo5b	Unconventional myosin-Vb
P21278	GNA11_MOUSE	Gna11	Guanine nucleotide-binding protein subunit alpha-11		0.500903	0.184988	12	8	6	40.9	25.9	20.1	42.024	0	16.996	146140000	38	24.171	24.5219	NaN	24.4129	24.0057	23.8446	24.1648	24.1382	23.793	23.7778	24.4207		P21278	GNA11_MOUSE	Gna11	Guanine nucleotide-binding protein subunit alpha-11
P21279	GNAQ_MOUSE	Gnaq	Guanine nucleotide-binding protein G(q) subunit alpha		0.577067	0.172865	12	12	7	45.7	45.7	26.5	42.158	0	25.714	162570000	55	23.0682	22.9946	23.1081	22.8488	22.8514	22.6791	22.9907	22.3033	22.5063	22.8762	22.9029		P21279	GNAQ_MOUSE	Gnaq	Guanine nucleotide-binding protein G(q) subunit alpha
P21300	ALD1_MOUSE	Akr1b7	Aldo-keto reductase family 1 member B7		0	NaN	6	2	2	11.7	3.8	3.8	35.988	0	36.714	214940000	22	NaN	NaN	NaN	NaN	NaN	NaN	NaN	NaN	NaN	NaN	NaN		P21300	ALD1_MOUSE	Akr1b7	Aldo-keto reductase family 1 member B7
P21460	CYTC_MOUSE	Cst3	Cystatin-C		0.171083	-0.0514758	5	5	5	42.1	42.1	42.1	15.531	0	40.737	1047000000	119	24.9889	24.8482	25.0219	24.9846	25.1451	24.7556	24.8576	25.2136	24.6102	24.689	25.0236		P21460	CYTC_MOUSE	Cst3	Cystatin-C
P21550	ENOB_MOUSE	Eno3	Beta-enolase		0.320143	0.631189	23	19	18	62	50.2	50.2	47.024	0	300.44	6224700000	397	24.2224	28.3221	27.1641	27.8717	26.5728	25.1739	25.4781	27.3026	25.6359	27.1202	NaN		P21550	ENOB_MOUSE	Eno3	Beta-enolase
P21614	VTDB_MOUSE	Gc	Vitamin D-binding protein		0.912251	-0.146408	31	31	31	69.7	69.7	69.7	53.6	0	323.31	17720000000	1788	28.3794	27.8059	27.8804	28.0756	28.0404	27.8434	27.9708	28.0268	28.0378	27.9086	27.9767		P21614	VTDB_MOUSE	Gc	Vitamin D-binding protein
P21619	LMNB2_MOUSE	Lmnb2	Lamin-B2		0	NaN	5	4	4	9.6	8.1	8.1	67.317	0.001472	4.808	567900000	7	NaN	NaN	NaN	NaN	NaN	NaN	NaN	NaN	NaN	NaN	NaN		P21619	LMNB2_MOUSE	Lmnb2	Lamin-B2
P21844	CMA1_MOUSE	Cma1	Chymase		0.0138462	-0.0451584	4	4	4	20.6	20.6	20.6	27.586	0.00054675	7.5174	27570000	12	22.4353	22.4642	20.9536	NaN	NaN	NaN	NaN	NaN	NaN	NaN	21.0729		P21844	CMA1_MOUSE	Cma1	Chymase
P21956	MFGM_MOUSE	Mfge8	Lactadherin		0.70154	-0.171969	26	26	26	50.3	50.3	50.3	51.24	0	323.31	43328000000	2022	30.8751	30.3658	30.784	30.8492	31.1477	30.5958	31.0153	30.9535	30.7092	30.7391	30.9394		P21956	MFGM_MOUSE	Mfge8	Lactadherin
P21958	TAP1_MOUSE	Tap1	Antigen peptide transporter 1		0.222659	-0.204119	9	9	9	20.6	20.6	20.6	78.863	0	37.605	187000000	47	23.8329	23.7261	23.7942	23.1224	24.114	24.5253	24.9744	24.1951	24.2383	25.2166	23.7987		P21958	TAP1_MOUSE	Tap1	Antigen peptide transporter 1
P21981	TGM2_MOUSE	Tgm2	Protein-glutamine gamma-glutamyltransferase 2		0.27399	-0.0970874	12	12	12	20.7	20.7	20.7	77.06	0	57.281	832990000	167	23.7952	23.8593	23.7102	23.8737	24.0744	23.8895	24.0768	23.7652	24.5687	23.8013	23.8691		P21981	TGM2_MOUSE	Tgm2	Protein-glutamine gamma-glutamyltransferase 2
F6T2S0	F6T2S0_MOUSE	Fech	Ferrochelatase		0.448616	0.107758	12	12	12	42.8	42.8	42.8	39.594	0	28.73	577440000	76	23.8127	24.138	23.9338	24.1642	24.0803	24.135	24.3641	24.0499	23.8595	24.3892	24.0439		F6T2S0	F6T2S0_MOUSE	Fech	Ferrochelatase
P22366	MYD88_MOUSE	Myd88	Myeloid differentiation primary response protein MyD88		0.08074	-0.0347504	6	6	6	23	23	23	33.753	0.000306	11.566	85271000	58	23.687	23.1563	23.486	23.7342	23.0898	23.068	23.455	23.1932	23.3115	23.5361	23.6703		P22366	MYD88_MOUSE	Myd88	Myeloid differentiation primary response protein MyD88
P22437	PGH1_MOUSE	Ptgs1	Prostaglandin G/H synthase 1		0.00204385	0.00116736	20	20	20	37.5	37.5	37.5	69.042	0	47.866	1495100000	161	24.9347	24.5577	25.0515	24.5682	25.0369	24.6581	24.286	24.5402	24.7569	24.1517	24.3183		P22437	PGH1_MOUSE	Ptgs1	Prostaglandin G/H synthase 1
P22599	A1AT2_MOUSE	Serpina1b	Alpha-1-antitrypsin 1-2		0.135335	-0.0416234	23	9	8	56.7	25.7	22	45.974	0	323.31	17232000000	1046	29.4088	29.0276	29.0036	29.282	28.8096	29.2911	28.8701	29.2379	29.2101	29.061	29.0915		P22599	A1AT2_MOUSE	Serpina1b	Alpha-1-antitrypsin 1-2
P22892	AP1G1_MOUSE	Ap1g1	AP-1 complex subunit gamma-1		0.664118	-0.0871786	39	39	37	51.8	51.8	50.6	91.349	0	323.31	5346700000	839	26.8616	27.0864	27.1055	26.9403	27.2192	27.039	26.9575	27.1311	27.1983	27.1164	27.1509		P22892	AP1G1_MOUSE	Ap1g1	AP-1 complex subunit gamma-1
P22907	HEM3_MOUSE	Hmbs	Porphobilinogen deaminase		1.28729	0.39104	10	10	10	32.1	32.1	32.1	39.344	0	15.118	407690000	67	24.7	24.9382	25.0266	25.009	24.306	24.7206	25.1288	24.4783	24.9013	24.0564	24.9997		P22907	HEM3_MOUSE	Hmbs	Porphobilinogen deaminase
P22935	RABP2_MOUSE	Crabp2	Cellular retinoic acid-binding protein 2		0.144766	-0.0539536	5	5	5	40.6	40.6	40.6	15.746	0	92.636	521420000	100	24.0777	23.7998	24.2413	23.4372	23.7245	23.9871	23.8267	24.0348	24.0704	23.9016	23.6652		P22935	RABP2_MOUSE	Crabp2	Cellular retinoic acid-binding protein 2
P23116	EIF3A_MOUSE	Eif3a	Eukaryotic translation initiation factor 3 subunit A		0.0415818	0.00569693	79	79	79	50.9	50.9	50.9	161.93	0	323.31	28534000000	2364	27.5324	27.6751	27.6584	27.4992	27.6041	27.6775	27.5584	27.5947	27.7417	27.6453	27.53		P23116	EIF3A_MOUSE	Eif3a	Eukaryotic translation initiation factor 3 subunit A
Q9DCC5	Q9DCC5_MOUSE	Cbx3	Cbx3 protein		0.0955944	0.0310595	6	6	5	30.1	30.1	21.3	20.811	0	22.811	632350000	115	23.9816	23.833	23.5343	23.7103	23.3171	23.8087	23.8551	23.7144	23.9297	23.6123	23.7482		Q9DCC5	Q9DCC5_MOUSE	Cbx3	Cbx3 protein
A0A0R4J187	A0A0R4J187_MOUSE	Xrcc6	ATP-dependent DNA helicase 2 subunit 1		1.32025	0.323247	6	6	6	10.7	10.7	10.7	69.484	0.0005454	7.438	136390000	33	22.2753	22.5335	22.2215	22.2679	21.9205	22.532	22.6219	21.7357	22.0978	22.5071	22.1363		A0A0R4J187	A0A0R4J187_MOUSE	Xrcc6	ATP-dependent DNA helicase 2 subunit 1
Q543K9	Q543K9_MOUSE	Pnp	Purine nucleoside phosphorylase		0.114913	-0.0287104	19	19	19	84.8	84.8	84.8	32.263	0	323.31	10123000000	747	28.9069	28.9522	28.9205	28.8619	28.9418	28.8401	29.1929	28.792	28.8854	29.1371	29.23		Q543K9	Q543K9_MOUSE	Pnp	Purine nucleoside phosphorylase
P23506	PIMT_MOUSE	Pcmt1	Protein-L-isoaspartate(D-aspartate) O-methyltransferase		0.458968	-0.0874474	10	10	10	55.1	55.1	55.1	24.634	0	70.349	1204100000	168	24.6619	24.2492	24.5834	24.5498	24.6903	24.589	24.5792	24.4288	24.7968	24.5614	24.4463		P23506	PIMT_MOUSE	Pcmt1	Protein-L-isoaspartate(D-aspartate) O-methyltransferase
P23591	FCL_MOUSE	Gfus	GDP-L-fucose synthase		0.0938644	-0.0198259	18	18	18	66	66	66	35.877	0	323.31	4163500000	449	27.3625	27.4393	27.2654	27.0523	27.366	27.2147	27.493	27.3427	27.2088	27.2412	27.3553		P23591	FCL_MOUSE	Gfus	GDP-L-fucose synthase
P23780	BGAL_MOUSE	Glb1	Beta-galactosidase		0.853637	0.243284	17	17	17	29.2	29.2	29.2	73.12	0	90.436	2144500000	224	27.2047	27.5989	27.6035	27.8333	27.942	27.8764	27.653	27.2255	27.1858	27.6225	27.6378		P23780	BGAL_MOUSE	Glb1	Beta-galactosidase
P23927	CRYAB_MOUSE	Cryab	Alpha-crystallin B chain		0.923492	0.663839	10	10	10	79.4	79.4	79.4	20.069	0	103.1	1202500000	121	25.332	27.1006	27.2708	27.5678	25.9597	26.8037	26.8321	26.7708	26.5415	27.7291	26.3738		P23927	CRYAB_MOUSE	Cryab	Alpha-crystallin B chain
A0A1W2P7G3	A0A1W2P7G3_MOUSE	Zfp36l1	mRNA decay activator protein ZFP36L1		0	NaN	1	1	1	21.4	21.4	21.4	9.2648	0.00053079	6.673	2073500	6	NaN	NaN	NaN	NaN	NaN	NaN	NaN	NaN	NaN	NaN	NaN		A0A1W2P7G3	A0A1W2P7G3_MOUSE	Zfp36l1	mRNA decay activator protein ZFP36L1
P23953	EST1C_MOUSE	Ces1c	Carboxylesterase 1C		1.20841	-0.216953	29	29	19	63.7	63.7	49.1	61.055	0	323.31	18568000000	1326	29.5315	29.0992	29.087	29.3662	29.4719	29.1821	28.9691	29.3956	29.2327	29.0484	29.466		P23953	EST1C_MOUSE	Ces1c	Carboxylesterase 1C
P24270	CATA_MOUSE	Cat	Catalase		1.39074	-0.143327	31	31	31	66.2	66.2	66.2	59.795	0	323.31	8740200000	838	26.1025	26.044	26.0916	26.0606	26.2069	26.1508	26.0602	26.1769	26.398	26.3616	26.1027		P24270	CATA_MOUSE	Cat	Catalase
P24369	PPIB_MOUSE	Ppib	Peptidyl-prolyl cis-trans isomerase B		0.267828	0.0491833	22	22	22	70.4	70.4	70.4	23.713	0	323.31	44684000000	1652	30.6077	30.4049	30.3845	30.3356	30.1294	30.4192	30.4438	30.3167	30.2264	30.3741	30.4363		P24369	PPIB_MOUSE	Ppib	Peptidyl-prolyl cis-trans isomerase B
P24472	GSTA4_MOUSE	Gsta4	Glutathione S-transferase A4		0.021855	-0.00698643	9	7	7	44.6	40.5	40.5	25.564	0	13.121	401730000	77	23.085	23.3647	22.9524	23.1922	23.1889	23.2785	23.3761	23.3667	22.9707	23.3728	23.4545		P24472	GSTA4_MOUSE	Gsta4	Glutathione S-transferase A4
P24527	LKHA4_MOUSE	Lta4h	Leukotriene A-4 hydrolase		0.344629	0.0564937	43	43	43	71.4	71.4	71.4	69.05	0	323.31	9869200000	1053	27.6788	27.6973	27.7361	27.5822	27.567	27.5936	27.8508	27.6709	27.4504	27.6214	27.8244		P24527	LKHA4_MOUSE	Lta4h	Leukotriene A-4 hydrolase
P24547	IMDH2_MOUSE	Impdh2	Inosine-5-monophosphate dehydrogenase 2		1.10103	0.1829	15	15	14	36.8	36.8	35.2	55.814	0	50.427	821470000	192	24.539	24.811	24.7608	24.7719	24.396	24.8573	24.7113	24.3836	24.827	24.8315	24.6203		P24547	IMDH2_MOUSE	Impdh2	Inosine-5-monophosphate dehydrogenase 2
P24549	AL1A1_MOUSE	Aldh1a1	Retinal dehydrogenase 1		0.0659494	-0.0362887	22	14	14	58.9	40.9	40.9	54.467	0	38.134	454480000	90	25.4353	25.6739	25.5437	26.0942	25.7403	25.5818	25.0109	25.6495	25.5315	26.0653	25.2812		P24549	AL1A1_MOUSE	Aldh1a1	Retinal dehydrogenase 1
P24638	PPAL_MOUSE	Acp2	Lysosomal acid phosphatase		0	NaN	4	4	4	9.5	9.5	9.5	48.508	0.0060647	3.3942	45855000	21	NaN	NaN	NaN	NaN	NaN	NaN	NaN	NaN	NaN	NaN	NaN		P24638	PPAL_MOUSE	Acp2	Lysosomal acid phosphatase
P24668	MPRD_MOUSE	M6pr	Cation-dependent mannose-6-phosphate receptor		1.31319	-0.21272	6	6	6	25.2	25.2	25.2	31.172	0	323.31	1164100000	157	24.8531	24.3438	24.5332	24.4194	24.8074	24.6675	24.7166	24.5406	24.5909	24.7798	24.9212		P24668	MPRD_MOUSE	M6pr	Cation-dependent mannose-6-phosphate receptor
P25206	MCM3_MOUSE	Mcm3	DNA replication licensing factor MCM3		0	NaN	3	3	3	4.1	4.1	4.1	91.545	0.0016908	4.4845	8794700	16	NaN	NaN	NaN	NaN	NaN	NaN	NaN	NaN	NaN	NaN	NaN		P25206	MCM3_MOUSE	Mcm3	DNA replication licensing factor MCM3
P25444	RS2_MOUSE	Rps2	40S ribosomal protein S2		1.42176	-0.110305	22	22	22	54.9	54.9	54.9	31.231	0	323.31	59070000000	1854	29.6014	29.5126	29.4649	29.2978	29.4775	29.4224	29.356	29.6047	29.4537	29.4955	29.4933		P25444	RS2_MOUSE	Rps2	40S ribosomal protein S2
P25785	TIMP2_MOUSE	Timp2	Metalloproteinase inhibitor 2		0	NaN	3	3	3	15.9	15.9	15.9	24.328	0.00028977	9.4414	33548000	15	NaN	NaN	23.5426	NaN	NaN	NaN	23.7376	NaN	NaN	NaN	NaN		P25785	TIMP2_MOUSE	Timp2	Metalloproteinase inhibitor 2
P25799	NFKB1_MOUSE	Nfkb1	Nuclear factor NF-kappa-B p105 subunit		0.649603	-0.139261	12	12	12	15.6	15.6	15.6	105.61	0	23.201	1577600000	105	26.1869	26.2512	25.984	26.1385	26.3088	25.8525	26.1558	25.9967	26.3465	26.4568	25.9984		P25799	NFKB1_MOUSE	Nfkb1	Nuclear factor NF-kappa-B p105 subunit
P25911	LYN_MOUSE	Lyn	Tyrosine-protein kinase Lyn		0.520451	0.241613	9	7	7	18.9	16	16	58.812	0.0005493	7.6323	86159000	26	22.3219	22.8181	22.1947	22.5385	22.7063	NaN	22.9744	NaN	NaN	22.0905	22.4405		P25911	LYN_MOUSE	Lyn	Tyrosine-protein kinase Lyn
P26039	TLN1_MOUSE	Tln1	Talin-1		0.220304	-0.0300324	99	99	92	56.7	56.7	53.1	269.82	0	323.31	17178000000	2009	27.3834	27.4298	27.3025	27.3656	27.2458	27.2554	27.406	27.2875	27.5229	27.3827	27.4691		P26039	TLN1_MOUSE	Tln1	Talin-1
P26040	EZRI_MOUSE	Ezr	Ezrin		1.5273	0.127588	37	25	25	53.1	38.7	38.7	69.406	0	323.31	4283300000	549	25.8437	25.9269	26.068	26.0897	25.803	26.0996	25.9876	25.8943	25.9662	25.8887	26.0449		P26040	EZRI_MOUSE	Ezr	Ezrin
P26041	MOES_MOUSE	Msn	Moesin		0.46311	0.0850887	48	48	34	70.5	70.5	54.9	67.766	0	323.31	18558000000	1362	30.0198	29.9378	29.7874	30.027	29.6945	30.0185	30.1009	29.7796	29.7847	29.9794	30.0771		P26041	MOES_MOUSE	Msn	Moesin
P26043	RADI_MOUSE	Rdx	Radixin		0.0856794	-0.0157272	37	23	22	53.5	36.7	35.2	68.542	0	323.31	5597400000	904	26.1251	25.8605	26.1081	25.9155	25.9124	25.8981	25.8271	25.8885	25.9287	25.7853	25.9854		P26043	RADI_MOUSE	Rdx	Radixin
P26231	CTNA1_MOUSE	Ctnna1	Catenin alpha-1		0.819458	0.0894089	45	45	37	61.4	61.4	54	100.11	0	323.31	3148100000	581	25.7425	25.8749	25.841	25.7818	25.6332	25.8428	25.8962	25.6766	25.953	25.8472	25.695		P26231	CTNA1_MOUSE	Ctnna1	Catenin alpha-1
P26262	KLKB1_MOUSE	Klkb1	Plasma kallikrein		0.62588	-0.195409	11	11	11	25.5	25.5	25.5	71.382	0	26.664	365580000	80	24.0843	23.4409	23.7188	23.802	24.151	24.421	24.016	24.1215	23.9594	24.1801	23.9546		P26262	KLKB1_MOUSE	Klkb1	Plasma kallikrein
P26350	PTMA_MOUSE	Ptma	Prothymosin alpha		1.68731	1.32457	4	4	4	36	36	36	12.254	0	77.359	2769800000	105	25.9395	NaN	27.7771	28.3009	26.9958	28.6861	26.6047	26.7255	25.675	26.7853	26.9847		P26350	PTMA_MOUSE	Ptma	Prothymosin alpha
Q80XR5	Q80XR5_MOUSE	U2af2	U2 snRNP auxiliary factor large subunit		0.402211	0.101234	12	12	12	32.1	32.1	32.1	53.12	0	96.619	611270000	130	24.9923	24.8674	25.075	24.9835	24.7702	25.29	25.3705	24.9445	25.2806	25.0834	25.0252		Q80XR5	Q80XR5_MOUSE	U2af2	U2 snRNP auxiliary factor large subunit
P26443	DHE3_MOUSE	Glud1	Glutamate dehydrogenase 1, mitochondrial		0.0586873	-0.0104671	30	30	30	61.8	61.8	61.8	61.336	0	323.31	7769800000	930	26.5718	26.462	26.6249	26.6815	26.5156	26.7786	26.6479	26.6592	26.7352	26.7759	26.6389		P26443	DHE3_MOUSE	Glud1	Glutamate dehydrogenase 1, mitochondrial
P26450	P85A_MOUSE	Pik3r1	Phosphatidylinositol 3-kinase regulatory subunit alpha		0.907381	-0.206715	12	11	10	23.5	22.5	21.5	83.516	0	47.264	1026700000	71	27.0455	26.9844	27.046	26.8369	26.9228	26.6051	27.212	27.2144	27.3555	27.0117	27.3117		P26450	P85A_MOUSE	Pik3r1	Phosphatidylinositol 3-kinase regulatory subunit alpha
P26516	PSMD7_MOUSE	Psmd7	26S proteasome non-ATPase regulatory subunit 7		0.395096	-0.0879985	22	22	22	75.4	75.4	75.4	36.539	0	255.21	6389400000	543	29.2887	29.4567	29.29	29.1219	29.2716	29.3126	29.4192	29.2864	29.729	29.5491	29.3237		P26516	PSMD7_MOUSE	Psmd7	26S proteasome non-ATPase regulatory subunit 7
P26638	SYSC_MOUSE	Sars1	Serine--tRNA ligase, cytoplasmic		0.0964629	0.0192095	45	45	45	77.1	77.1	77.1	58.388	0	323.31	16080000000	1514	27.9578	28.0787	28.0361	28.0554	27.976	27.6876	27.8362	27.9404	27.8551	27.8335	27.9548		P26638	SYSC_MOUSE	Sars1	Serine--tRNA ligase, cytoplasmic
P26645	MARCS_MOUSE	Marcks	Myristoylated alanine-rich C-kinase substrate		1.3671	0.22303	13	13	13	68	68	68	29.661	0	323.31	1773300000	201	25.3126	25.5266	25.5252	25.436	25.1612	25.7818	25.4753	25.1773	25.2953	25.3776	25.6319		P26645	MARCS_MOUSE	Marcks	Myristoylated alanine-rich C-kinase substrate
P26883	FKB1A_MOUSE	Fkbp1a	Peptidyl-prolyl cis-trans isomerase FKBP1A		0.111438	-0.0254264	8	8	8	82.4	82.4	82.4	11.922	0	321.61	2399000000	232	26.4453	26.3032	26.3904	26.1651	26.2195	26.6378	26.3912	26.4442	26.4945	26.4976	26.3168		P26883	FKB1A_MOUSE	Fkbp1a	Peptidyl-prolyl cis-trans isomerase FKBP1A
P27005	S10A8_MOUSE	S100a8	Protein S100-A8		0.691987	0.787314	3	3	3	50.6	50.6	50.6	10.294	0	323.31	11696000000	396	30.0716	31.0659	29.5096	29.5964	29.838	30.5017	31.8828	28.8023	28.6791	29.8267	31.1261		P27005	S10A8_MOUSE	S100a8	Protein S100-A8
P27046	MA2A1_MOUSE	Man2a1	Alpha-mannosidase 2		0.377548	-0.0630193	40	40	39	41.7	41.7	41	131.63	0	322.46	3194500000	520	25.2747	25.3326	25.3147	25.2274	25.4285	25.0466	25.4004	25.2492	25.218	25.499	25.2949		P27046	MA2A1_MOUSE	Man2a1	Alpha-mannosidase 2
P63163	RSMN_MOUSE	Snrpn	Small nuclear ribonucleoprotein-associated protein N		0.0806645	0.0529835	7	7	7	24.6	24.6	24.6	24.614	0	19.535	770000000	86	25.935	26.6555	26.3314	26.429	26.2548	26.976	26.8751	26.8707	27.17	26.9479	26.4242		P63163	RSMN_MOUSE	Snrpn	Small nuclear ribonucleoprotein-associated protein N
P27546	MAP4_MOUSE	Map4	Microtubule-associated protein 4		1.52983	0.196049	29	29	22	42.2	42.2	31.2	117.43	0	238.57	1983200000	347	24.1195	24.3904	24.3236	24.2557	24.1451	24.3744	24.1344	23.969	24.333	23.9461	24.0851		P27546	MAP4_MOUSE	Map4	Microtubule-associated protein 4
P27601	GNA13_MOUSE	Gna13	Guanine nucleotide-binding protein subunit alpha-13		0.195602	0.0794376	7	7	7	21.2	21.2	21.2	44.054	0	20.319	117380000	39	23.6849	23.8338	24.029	23.7153	23.5609	23.3316	24.019	NaN	NaN	23.645	23.9345		P27601	GNA13_MOUSE	Gna13	Guanine nucleotide-binding protein subunit alpha-13
P27612	PLAP_MOUSE	Plaa	Phospholipase A-2-activating protein		1.01286	0.125741	30	30	30	50.5	50.5	50.5	87.22	0	296.94	1640600000	325	24.9861	25.1431	25.0216	25.0552	24.8695	25.2177	25.0895	25.0818	24.7719	25.1132	25.0556		P27612	PLAP_MOUSE	Plaa	Phospholipase A-2-activating protein
P27641	XRCC5_MOUSE	Xrcc5	X-ray repair cross-complementing protein 5		0.602512	0.311331	8	8	8	14.2	14.2	14.2	83.056	0.00028727	9.2403	117290000	23	22.5713	22.734	22.2791	22.6868	21.9242	23.105	22.3776	NaN	NaN	22.4801	NaN		P27641	XRCC5_MOUSE	Xrcc5	X-ray repair cross-complementing protein 5
P27659	RL3_MOUSE	Rpl3	60S ribosomal protein L3		0.0575988	0.0108897	34	34	32	64.8	64.8	61.8	46.109	0	323.31	54735000000	2818	30.8113	30.7828	30.787	30.6743	30.5841	30.8976	30.7256	30.887	30.6299	30.8944	30.7688		P27659	RL3_MOUSE	Rpl3	60S ribosomal protein L3
P27661	H2AX_MOUSE	H2ax	Histone H2AX		0	NaN	6	2	0	52.4	21	0	15.142	0.00029878	10.547	43395000	13	NaN	NaN	NaN	NaN	NaN	NaN	NaN	NaN	NaN	NaN	NaN		P27661	H2AX_MOUSE	H2ax	Histone H2AX
P27773	PDIA3_MOUSE	Pdia3	Protein disulfide-isomerase A3		1.03951	0.102599	51	51	51	74.1	74.1	74.1	56.678	0	323.31	82440000000	3933	29.0169	29.0558	29.1029	29.0973	28.7454	29.0686	29.0561	28.9643	29.0603	29.0658	28.9885		P27773	PDIA3_MOUSE	Pdia3	Protein disulfide-isomerase A3
P27808	MGAT1_MOUSE	Mgat1	Alpha-1,3-mannosyl-glycoprotein 2-beta-N-acetylglucosaminyltransferase		0.401628	0.462625	6	6	6	12.3	12.3	12.3	51.69	0.0014993	5.1805	72936000	22	NaN	NaN	23.3961	23.6204	22.9416	24.6347	NaN	NaN	23.486	24.3158	22.941		P27808	MGAT1_MOUSE	Mgat1	Alpha-1,3-mannosyl-glycoprotein 2-beta-N-acetylglucosaminyltransferase
F6SZ47	F6SZ47_MOUSE	Braf	Non-specific serine/threonine protein kinase (Fragment)		0	NaN	4	1	1	6.7	2.5	2.5	83.201	0.005016	3.5832	5037100	1	NaN	NaN	NaN	NaN	NaN	NaN	NaN	NaN	NaN	NaN	NaN		F6SZ47	F6SZ47_MOUSE	Braf	Non-specific serine/threonine protein kinase (Fragment)
P28063	PSB8_MOUSE	Psmb8	Proteasome subunit beta type-8		0.503152	0.245501	7	7	7	31.5	31.5	31.5	30.26	0	76.455	1245500000	135	25.0799	25.0107	24.8379	24.8876	24.513	25.1696	25.8895	25.2538	24.4691	25.1508	25.0148		P28063	PSB8_MOUSE	Psmb8	Proteasome subunit beta type-8
P28271	ACOC_MOUSE	Aco1	Cytoplasmic aconitate hydratase		0.280482	0.0493306	49	49	48	64.3	64.3	63.4	98.124	0	323.31	33319000000	2164	30.3987	30.4079	30.537	30.4172	30.4237	30.3176	30.2022	30.3493	30.1188	30.2483	30.4235		P28271	ACOC_MOUSE	Aco1	Cytoplasmic aconitate hydratase
P28352	APEX1_MOUSE	Apex1	DNA-(apurinic or apyrimidinic site) endonuclease		0.23461	-0.0526512	11	11	11	46.4	46.4	46.4	35.49	0	102.41	1551900000	204	26.4142	26.3421	26.1811	26.2881	26.1954	26.0318	26.2033	26.229	26.3483	25.9606	26.424		P28352	APEX1_MOUSE	Apex1	DNA-(apurinic or apyrimidinic site) endonuclease
P28474	ADHX_MOUSE	Adh5	Alcohol dehydrogenase class-3		0.288441	-0.0473164	25	25	23	77.5	77.5	77.5	39.547	0	323.31	6468600000	741	26.1962	26.188	26.2236	26.0251	26.0224	25.8656	26.0121	26.1891	26.1416	25.9972	26.1145		P28474	ADHX_MOUSE	Adh5	Alcohol dehydrogenase class-3
P28650	PURA1_MOUSE	Adss1	Adenylosuccinate synthetase isozyme 1		2.30374	1.03268	10	10	10	32.8	32.8	32.8	50.254	0	20.655	149180000	61	22.5058	24.1206	23.3872	24.213	22.4672	23.433	NaN	23.1095	22.5713	23.1252	NaN		P28650	PURA1_MOUSE	Adss1	Adenylosuccinate synthetase isozyme 1
P28653	PGS1_MOUSE	Bgn	Biglycan		0.0808793	0.0341489	15	15	15	45	45	45	41.639	0	323.31	2675800000	408	25.2992	25.2605	25.2423	25.7166	25.7663	25.4054	25.1483	24.9998	25.5197	25.1929	25.1451		P28653	PGS1_MOUSE	Bgn	Biglycan
P28654	PGS2_MOUSE	Dcn	Decorin		0.64459	-0.197375	14	14	14	47.7	47.7	47.7	39.809	0	276.31	7099200000	602	28.1292	28.0556	27.9876	27.9005	28.1535	27.4572	28.1161	27.8775	28.3376	28.3529	27.7541		P28654	PGS2_MOUSE	Dcn	Decorin
Q3TF41	Q3TF41_MOUSE	Nap1l1	Nucleosome assembly protein 1-like 1		0.251718	-0.0699785	8	6	6	19.8	16.8	16.8	42.732	0	36.045	683160000	180	25.2523	25.3643	25.0971	25.0461	25.4063	24.9071	24.9476	24.9898	25.1944	24.8417	25.17		Q3TF41	Q3TF41_MOUSE	Nap1l1	Nucleosome assembly protein 1-like 1
P28658	ATX10_MOUSE	Atxn10	Ataxin-10		0.891189	0.299002	10	10	10	29.3	29.3	29.3	53.706	0	44.992	275360000	63	24.8207	25.3839	24.9317	25.0101	24.8192	24.5257	24.8237	24.5264	24.359	24.2994	24.9914		P28658	ATX10_MOUSE	Atxn10	Ataxin-10
P28659	CELF1_MOUSE	Celf1	CUGBP Elav-like family member 1		1.94624	-0.376789	10	7	6	21.8	17.5	15.2	52.107	0	62.639	249990000	83	23.5742	23.2674	23.0407	23.1914	23.4658	23.5798	23.5768	23.8437	23.7743	23.8224	23.7677		P28659	CELF1_MOUSE	Celf1	CUGBP Elav-like family member 1
P28660	NCKP1_MOUSE	Nckap1	Nck-associated protein 1		0.311733	-0.0629154	23	23	23	33.6	33.6	33.6	128.78	0	237.5	1273200000	228	25.5973	25.8635	25.5745	25.7815	25.8907	25.5038	25.8736	25.6973	25.9066	25.8158	25.7861		P28660	NCKP1_MOUSE	Nckap1	Nck-associated protein 1
P28665	MUG1_MOUSE	Mug1	Murinoglobulin-1		1.11017	-0.311469	40	40	40	39.2	39.2	39.2	165.3	0	323.31	3928000000	671	26.6384	26.3863	26.7804	26.7087	26.882	26.974	26.9466	27.369	27.3181	27.0808	27.1357		P28665	MUG1_MOUSE	Mug1	Murinoglobulin-1
P28667	MRP_MOUSE	Marcksl1	MARCKS-related protein		0.277088	0.116989	5	5	5	62	62	62	20.165	0	123.54	503740000	52	24.571	23.8632	24.3203	24.7254	24.002	24.1104	24.6071	23.9323	24.1503	24.2182	24.3759		P28667	MRP_MOUSE	Marcksl1	MARCKS-related protein
E0CZ72	E0CZ72_MOUSE	Kif2a	Kinesin-like protein		1.73045	-0.265372	7	7	7	8.1	8.1	8.1	83.86	0.00030211	11.012	135590000	44	23.6341	23.2758	23.3098	23.5652	23.714	23.566	23.4234	23.621	NaN	23.9389	23.5592		E0CZ72	E0CZ72_MOUSE	Kif2a	Kinesin-like protein
P28798	GRN_MOUSE	Grn	Progranulin		0	-0.00486279	3	3	3	8.8	8.8	8.8	63.458	0.0043931	3.7876	43983000	11	NaN	NaN	NaN	23.3695	23.3868	NaN	23.3944	NaN	NaN	NaN	NaN		P28798	GRN_MOUSE	Grn	Progranulin
P28843	DPP4_MOUSE	Dpp4	Dipeptidyl peptidase 4		1.78197	-0.54423	11	11	11	18.3	18.3	18.3	87.436	0	20.57	338720000	68	25.0439	24.2384	24.8442	24.1618	25.1647	24.2023	24.2208	24.3091	25.1317	24.7579	24.8591		P28843	DPP4_MOUSE	Dpp4	Dipeptidyl peptidase 4
P28867	KPCD_MOUSE	Prkcd	Protein kinase C delta type		1.25414	0.520993	7	7	5	12.3	12.3	9.8	77.546	0	20.031	75652000	31	NaN	23.6281	NaN	NaN	23.2874	NaN	23.7871	23.0858	NaN	NaN	NaN		P28867	KPCD_MOUSE	Prkcd	Protein kinase C delta type
P29341	PABP1_MOUSE	Pabpc1	Polyadenylate-binding protein 1		0.218707	-0.0349762	32	32	13	60.2	60.2	31.6	70.67	0	323.31	41187000000	1903	29.9067	29.8999	30.0456	29.7713	29.826	29.9933	29.8538	29.9562	30.0422	30.0984	29.8573		P29341	PABP1_MOUSE	Pabpc1	Polyadenylate-binding protein 1
P29351	PTN6_MOUSE	Ptpn6	Tyrosine-protein phosphatase non-receptor type 6		0.0306157	-0.0134563	26	26	26	57.3	57.3	57.3	67.558	0	101.79	1237500000	225	24.6507	24.555	24.6372	24.3803	24.4457	24.2696	25.0886	24.5727	24.483	24.492	24.9536		P29351	PTN6_MOUSE	Ptpn6	Tyrosine-protein phosphatase non-receptor type 6
P29387	GBB4_MOUSE	Gnb4	Guanine nucleotide-binding protein subunit beta-4		0	0.24276	10	5	5	42.6	28.5	28.5	37.379	0	17.475	34277000	16	NaN	NaN	22.0942	NaN	NaN	NaN	23.0736	22.3412	NaN	NaN	NaN		P29387	GBB4_MOUSE	Gnb4	Guanine nucleotide-binding protein subunit beta-4
Q9CPX4	Q9CPX4_MOUSE	Ftl1	Ferritin		0	0.769475	4	4	4	28.4	28.4	28.4	20.772	0.0005469	7.5251	74084000	14	24.5015	NaN	NaN	NaN	23.7912	NaN	24.9158	NaN	NaN	NaN	NaN		Q9CPX4	Q9CPX4_MOUSE	Ftl1	Ferritin
P29416	HEXA_MOUSE	Hexa	Beta-hexosaminidase subunit alpha		0	-0.364107	5	5	5	15.3	15.3	15.3	60.612	0	12.231	78964000	18	NaN	22.7242	22.3068	NaN	NaN	NaN	NaN	NaN	NaN	NaN	22.8796		P29416	HEXA_MOUSE	Hexa	Beta-hexosaminidase subunit alpha
P29452	CASP1_MOUSE	Casp1	Caspase-1		0.0702809	0.0293392	12	12	12	29.9	29.9	29.9	45.64	0	14.92	180010000	49	24.8174	24.7905	24.5453	24.6421	24.3649	24.9157	24.8277	24.4454	25.0896	24.8573	NaN		P29452	CASP1_MOUSE	Casp1	Caspase-1
P29595	NEDD8_MOUSE	Nedd8	NEDD8		0.777752	-0.395909	3	3	3	34.6	34.6	34.6	8.9723	0	31.794	1565100000	111	27.8759	28.3767	27.7164	27.2262	28.6483	28.0375	27.8201	28.1649	28.473	27.5696	28.656		P29595	NEDD8_MOUSE	Nedd8	NEDD8
P29699	FETUA_MOUSE	Ahsg	Alpha-2-HS-glycoprotein		1.11577	-0.203715	14	14	14	58	58	58	37.325	0	323.31	31259000000	1349	29.4003	28.9315	28.7966	29.0601	28.8341	28.8804	28.8702	29.284	29.1502	28.9948	29.0053		P29699	FETUA_MOUSE	Ahsg	Alpha-2-HS-glycoprotein
P29752	LALBA_MOUSE	Lalba	Alpha-lactalbumin		0.596533	-0.298775	7	7	7	39.9	39.9	39.9	16.26	0	323.31	16292000000	1023	28.6241	28.6166	27.8823	28.2295	28.7685	27.5662	27.7709	28.3869	28.406	27.9511	27.7347		P29752	LALBA_MOUSE	Lalba	Alpha-lactalbumin
P29758	OAT_MOUSE	Oat	Ornithine aminotransferase, mitochondrial		0.118181	-0.026377	18	18	18	48.1	48.1	48.1	48.354	0	295.03	1814500000	251	25.4372	25.5852	25.5475	25.8457	25.6215	25.3853	25.6637	25.6978	25.6898	25.7516	25.5932		P29758	OAT_MOUSE	Oat	Ornithine aminotransferase, mitochondrial
P29788	VTNC_MOUSE	Vtn	Vitronectin		2.20395	-0.30554	8	8	8	24.3	24.3	24.3	54.848	0	59.497	1633300000	225	25.0947	24.6669	24.6963	25.1338	24.9912	24.753	24.7939	25.2232	25.0467	25.2059	25.1243		P29788	VTNC_MOUSE	Vtn	Vitronectin
P30115	GSTA3_MOUSE	Gsta3	Glutathione S-transferase A3		0.0809331	0.0475384	13	13	11	54.8	54.8	50.7	25.36	0	54.554	3909500000	310	27.3738	27.2566	26.5306	27.0299	26.7136	26.6757	27.3881	26.5256	27.1786	27.1378	26.6424		P30115	GSTA3_MOUSE	Gsta3	Glutathione S-transferase A3
P30275	KCRU_MOUSE	Ckmt1	Creatine kinase U-type, mitochondrial		0	NaN	4	4	4	14.6	14.6	14.6	47.003	0.000297	10.388	56561000	13	NaN	24.3481	NaN	24.0041	NaN	24.1734	NaN	NaN	NaN	NaN	NaN		P30275	KCRU_MOUSE	Ckmt1	Creatine kinase U-type, mitochondrial
E9Q9E4	E9Q9E4_MOUSE	Cdk4	Cyclin-dependent kinase 4 (Fragment)		0	0.418559	4	3	3	19.8	16.6	16.6	28.021	0.0016851	4.4119	37904000	11	23.5739	23.6743	NaN	24.3106	NaN	NaN	NaN	NaN	NaN	NaN	NaN		E9Q9E4	E9Q9E4_MOUSE	Cdk4	Cyclin-dependent kinase 4 (Fragment)
P30412	PPIC_MOUSE	Ppic	Peptidyl-prolyl cis-trans isomerase C		0	NaN	5	5	5	37.7	37.7	37.7	22.794	0	12.702	48639000	24	NaN	NaN	NaN	NaN	NaN	NaN	NaN	NaN	NaN	NaN	NaN		P30412	PPIC_MOUSE	Ppic	Peptidyl-prolyl cis-trans isomerase C
P30416	FKBP4_MOUSE	Fkbp4	Peptidyl-prolyl cis-trans isomerase FKBP4		0.88055	-0.109763	42	42	42	73.1	73.1	73.1	51.572	0	323.31	12033000000	1249	27.5723	27.5907	27.5104	27.5968	27.6226	27.6845	27.5928	27.8077	27.6854	27.9261	27.6148		P30416	FKBP4_MOUSE	Fkbp4	Peptidyl-prolyl cis-trans isomerase FKBP4
P30681	HMGB2_MOUSE	Hmgb2	High mobility group protein B2		1.03495	-0.427106	8	7	7	32.9	27.1	27.1	24.162	0	42.535	3518400000	115	27.163	26.9299	26.534	26.6702	27.1275	27.3126	27.5756	27.4238	27.9601	27.2889	27.6261		P30681	HMGB2_MOUSE	Hmgb2	High mobility group protein B2
E9Q8Z8	E9Q8Z8_MOUSE	Ctnnd1	Catenin delta-1		1.29612	0.11419	33	33	33	39.9	39.9	39.9	108.17	0	323.31	3282800000	551	25.7514	26.0295	25.8747	25.7655	25.7354	25.9382	25.8653	25.7831	25.7958	25.909	25.7079		E9Q8Z8	E9Q8Z8_MOUSE	Ctnnd1	Catenin delta-1
P31001	DESM_MOUSE	Des	Desmin		0.437495	0.152714	12	6	6	22.2	14.9	14.9	53.497	0	12.248	25651000	15	20.365	20.5232	NaN	20.7837	NaN	NaN	NaN	NaN	NaN	20.6477	20.4896		P31001	DESM_MOUSE	Des	Desmin
P31230	AIMP1_MOUSE	Aimp1	Aminoacyl tRNA synthase complex-interacting multifunctional protein 1		0.502175	-0.0688435	19	19	19	73.2	73.2	73.2	33.997	0	323.31	4561400000	425	26.9608	26.9784	26.9299	26.8301	27.0585	26.6992	26.7566	26.9059	26.8853	26.8738	26.7618		P31230	AIMP1_MOUSE	Aimp1	Aminoacyl tRNA synthase complex-interacting multifunctional protein 1
P31324	KAP3_MOUSE	Prkar2b	cAMP-dependent protein kinase type II-beta regulatory subunit		1.64186	-0.332384	12	9	9	44	34.1	34.1	46.167	0	136.18	452660000	108	26.003	25.9588	25.8459	25.6829	26.3354	26.0017	26.0177	26.4475	25.9604	26.1264	26.53		P31324	KAP3_MOUSE	Prkar2b	cAMP-dependent protein kinase type II-beta regulatory subunit
P31428	DPEP1_MOUSE	Dpep1	Dipeptidase 1		0.128688	-0.0575305	8	8	8	26.8	26.8	26.8	45.722	0	55.226	584410000	95	25.5643	25.4907	25.1693	25.481	25.1625	24.8115	24.9504	24.9101	25.5331	25.1905	25.0681		P31428	DPEP1_MOUSE	Dpep1	Dipeptidase 1
P31532	SAA4_MOUSE	Saa4	Serum amyloid A-4 protein		0	NaN	2	2	2	17.7	17.7	17.7	15.088	0.0054446	3.5182	41160000	10	NaN	NaN	NaN	NaN	NaN	NaN	NaN	NaN	NaN	NaN	NaN		P31532	SAA4_MOUSE	Saa4	Serum amyloid A-4 protein
P31725	S10A9_MOUSE	S100a9	Protein S100-A9		1.21602	1.16104	6	6	6	40.7	40.7	40.7	13.049	0	323.31	10717000000	526	29.9777	30.9864	29.6694	30.9051	29.9081	30.7413	32.0298	28.7018	28.619	29.8855	31.1399		P31725	S10A9_MOUSE	S100a9	Protein S100-A9
P31750	AKT1_MOUSE	Akt1	RAC-alpha serine/threonine-protein kinase		0.98704	0.224524	14	14	13	36	36	31.7	55.707	0	35.921	500130000	104	23.6858	23.8642	23.8913	24.0434	23.8227	24.0132	23.8303	24.0085	23.2318	23.6744	23.8006		P31750	AKT1_MOUSE	Akt1	RAC-alpha serine/threonine-protein kinase
P31786	ACBP_MOUSE	Dbi	Acyl-CoA-binding protein		0.669497	0.1819	7	7	4	72.4	72.4	36.8	10	0	323.31	36864000000	1111	29.9848	30.0079	29.9567	30.3344	29.971	30.1183	29.6902	29.7928	29.474	29.75	30.0648		P31786	ACBP_MOUSE	Dbi	Acyl-CoA-binding protein
P31938	MP2K1_MOUSE	Map2k1	Dual specificity mitogen-activated protein kinase kinase 1		0.55108	-0.125864	21	16	16	58.5	45.3	45.3	43.474	0	116.36	1092200000	136	25.7589	25.5303	25.704	25.4124	25.7696	25.7763	26.0653	25.8317	25.7234	25.8756	25.9819		P31938	MP2K1_MOUSE	Map2k1	Dual specificity mitogen-activated protein kinase kinase 1
P32020	NLTP_MOUSE	Scp2	Non-specific lipid-transfer protein		0.0832385	-0.0223536	12	12	12	17.7	17.7	17.7	59.125	0	323.31	2736500000	350	26.7834	26.7236	26.9803	26.8866	26.8294	27.1289	27.0089	26.9207	27.1262	27.2219	26.9265		P32020	NLTP_MOUSE	Scp2	Non-specific lipid-transfer protein
P32067	LA_MOUSE	Ssb	Lupus La protein homolog		0.388671	-0.0803317	22	22	22	42.7	42.7	42.7	47.756	0	114.95	2684700000	392	25.8673	25.7135	25.6474	25.6366	25.6118	25.9349	25.9832	25.8351	25.9594	26.0356	25.8716		P32067	LA_MOUSE	Ssb	Lupus La protein homolog
P32233	DRG1_MOUSE	Drg1	Developmentally-regulated GTP-binding protein 1		0.671524	-0.141473	17	17	17	52.3	52.3	52.3	40.512	0	164.05	721950000	197	25.7513	25.7041	25.4016	25.4892	25.7975	25.5075	25.3887	25.5567	25.878	25.5231	25.3314		P32233	DRG1_MOUSE	Drg1	Developmentally-regulated GTP-binding protein 1
P32261	ANT3_MOUSE	Serpinc1	Antithrombin-III		1.73674	-0.35324	24	24	24	60	60	60	52.003	0	282.09	5847800000	573	27.9625	27.4131	27.4633	27.3599	28.0957	27.3121	27.3004	27.6913	27.384	27.5301	27.6746		P32261	ANT3_MOUSE	Serpinc1	Antithrombin-III
P32507	NECT2_MOUSE	Nectin2	Nectin-2		0.330167	-0.0896122	7	7	7	16.4	16.4	16.4	57.317	0	12.192	83571000	26	22.2858	22.238	22.3085	22.236	NaN	NaN	22.5799	NaN	22.5172	22.4877	NaN		P32507	NECT2_MOUSE	Nectin2	Nectin-2
P32848	PRVA_MOUSE	Pvalb	Parvalbumin alpha		0.540562	1.21813	15	15	15	84.5	84.5	84.5	11.93	0	323.31	23063000000	1159	25.8209	29.8739	28.9255	29.6548	28.459	26.7411	27.0812	28.7823	27.7278	28.7909	23.8421		P32848	PRVA_MOUSE	Pvalb	Parvalbumin alpha
P32883	RASK_MOUSE	Kras	GTPase KRas		0.457518	-0.0510718	9	9	5	54	54	28	21.656	0	20.458	547460000	111	24.0899	23.9859	23.9432	24.0309	23.9414	23.7921	23.9992	23.9535	24.0402	24.0777	23.9054		P32883	RASK_MOUSE	Kras	GTPase KRas
P32921	SYWC_MOUSE	Wars1	Tryptophan--tRNA ligase, cytoplasmic		0.790078	0.107972	24	24	24	66.3	66.3	66.3	54.357	0	179.18	2859600000	425	26.8707	27.097	27.2023	27.2474	26.9724	27.1201	27.0833	26.9218	27.24	27.1539	27.0936		P32921	SYWC_MOUSE	Wars1	Tryptophan--tRNA ligase, cytoplasmic
P33267	CP2F2_MOUSE	Cyp2f2	Cytochrome P450 2F2		0.0918826	-0.0339085	11	11	11	29.7	29.7	29.7	55.948	0	26.923	271530000	56	24.1593	23.9029	23.8872	23.7864	23.9053	24.0766	24.2871	24.1413	23.5868	24.0647	24.2743		P33267	CP2F2_MOUSE	Cyp2f2	Cytochrome P450 2F2
P33622	APOC3_MOUSE	Apoc3	Apolipoprotein C-III		0.602021	-0.25959	3	3	3	46.5	46.5	46.5	10.982	0	230.54	1560900000	188	26.3827	26.0344	25.3938	26.1074	26.5632	25.8714	25.725	25.5238	26.0182	25.7635	26.2646		P33622	APOC3_MOUSE	Apoc3	Apolipoprotein C-III
P34022	RANG_MOUSE	Ranbp1	Ran-specific GTPase-activating protein		0.138192	0.0386676	7	7	7	57.1	57.1	57.1	23.596	0	173.31	5726400000	275	28.3214	28.291	28.2687	28.1224	28.3402	28.1927	27.8938	27.9259	28.0726	27.8909	28.1393		P34022	RANG_MOUSE	Ranbp1	Ran-specific GTPase-activating protein
P34152	FAK1_MOUSE	Ptk2	Focal adhesion kinase 1		0.985559	-0.145958	13	13	12	15.1	15.1	14.4	119.24	0	107.01	279640000	91	23.5968	23.5721	23.4248	23.3576	23.5937	23.2822	23.2981	23.6103	23.6363	23.508	23.2524		P34152	FAK1_MOUSE	Ptk2	Focal adhesion kinase 1
P34884	MIF_MOUSE	Mif	Macrophage migration inhibitory factor		0.302988	0.105054	7	7	7	89.6	89.6	89.6	12.504	0	188.51	5269900000	275	29.4055	29.4408	29.3904	29.3545	28.8802	29.3486	28.8848	29.0652	29.1588	29.5672	28.9956		P34884	MIF_MOUSE	Mif	Macrophage migration inhibitory factor
P34914	HYES_MOUSE	Ephx2	Bifunctional epoxide hydrolase 2		1.44562	-0.325224	21	21	21	53.4	53.4	53.4	62.515	0	175.95	1298300000	203	25.0765	25.1823	24.7964	24.9642	25.2874	24.8881	25.2776	25.1016	25.5701	25.6102	25.436		P34914	HYES_MOUSE	Ephx2	Bifunctional epoxide hydrolase 2
A0A0A6YW28	A0A0A6YW28_MOUSE	Usp4	Ubiquitin carboxyl-terminal hydrolase		0.708223	0.0791658	24	24	22	33.3	33.3	31.3	103.72	0	68.928	706640000	195	24.5563	24.6785	24.5024	24.6978	24.6227	24.574	24.6186	24.3911	24.4204	24.622	24.5981		A0A0A6YW28	A0A0A6YW28_MOUSE	Usp4	Ubiquitin carboxyl-terminal hydrolase
P35235	PTN11_MOUSE	Ptpn11	Tyrosine-protein phosphatase non-receptor type 11		1.45612	-0.208094	14	14	14	30.5	30.5	30.5	68.034	0	37.653	678050000	126	26.22	26.3407	26.0995	26.2346	26.5399	25.9772	26.1556	26.4551	26.4833	26.2303	26.2892		P35235	PTN11_MOUSE	Ptpn11	Tyrosine-protein phosphatase non-receptor type 11
P35276	RAB3D_MOUSE	Rab3d	Ras-related protein Rab-3D		0.146803	-0.0688922	6	5	4	33.3	29.7	21	24.416	0	20.419	300830000	44	25.7963	26.2703	NaN	25.9491	26.1155	25.563	25.66	26.2343	25.8778	26.0302	25.5227		P35276	RAB3D_MOUSE	Rab3d	Ras-related protein Rab-3D
P35278	RAB5C_MOUSE	Rab5c	Ras-related protein Rab-5C		0.27804	-0.0619692	7	7	4	42.1	42.1	27.3	23.412	0	145.84	2426600000	293	25.9526	26.1497	25.6633	25.8371	25.9851	25.6518	25.9521	25.965	25.9657	25.7435	25.8648		P35278	RAB5C_MOUSE	Rab5c	Ras-related protein Rab-5C
P35279	RAB6A_MOUSE	Rab6a	Ras-related protein Rab-6A		0.0234181	0.00429916	19	19	4	71.6	71.6	22.6	23.59	0	172.47	6893000000	496	27.5829	27.7377	27.7777	27.6214	27.8269	27.6842	27.732	27.5414	27.8481	27.7794	27.6591		P35279	RAB6A_MOUSE	Rab6a	Ras-related protein Rab-6A
P35282	RAB21_MOUSE	Rab21	Ras-related protein Rab-21		0.224028	-0.0397552	12	12	12	48.2	48.2	48.2	24.106	0	42.037	576820000	141	25.4376	25.6606	25.4475	25.2793	25.4117	25.3524	25.5581	25.5814	25.6211	25.4854	25.4586		P35282	RAB21_MOUSE	Rab21	Ras-related protein Rab-21
P35293	RAB18_MOUSE	Rab18	Ras-related protein Rab-18		0.64707	-0.0892532	20	20	20	83	83	83	23.035	0	323.31	7884200000	926	27.539	27.3664	27.4637	27.2977	27.5987	27.6888	27.4072	27.5985	27.5549	27.5088	27.4041		P35293	RAB18_MOUSE	Rab18	Ras-related protein Rab-18
Q80YQ1	Q80YQ1_MOUSE	Thbs1	Thrombospondin-1		0.703608	0.721194	20	20	20	22.7	22.7	22.7	129.69	0	62.35	690140000	144	24.0504	24.5062	24.5222	25.3485	24.7016	24.8486	25.9598	24.0031	22.629	24.9856	25.5255		Q80YQ1	Q80YQ1_MOUSE	Thbs1	Thrombospondin-1
P35486	ODPA_MOUSE	Pdha1	Pyruvate dehydrogenase E1 component subunit alpha, somatic form, mitochondrial		2.18583	-0.230894	41	41	40	74.6	74.6	72.1	43.231	0	323.31	36760000000	2144	29.0936	28.9163	28.9016	28.9899	29.1632	28.9562	28.8692	29.3787	28.9918	29.249	29.0691		P35486	ODPA_MOUSE	Pdha1	Pyruvate dehydrogenase E1 component subunit alpha, somatic form, mitochondrial
P35505	FAAA_MOUSE	Fah	Fumarylacetoacetase		0.561721	-0.0603019	21	21	21	72.6	72.6	72.6	46.175	0	323.31	25591000000	1859	29.7508	29.628	29.6866	29.5326	29.7834	29.6671	29.6995	29.6559	29.5879	29.6131	29.8273		P35505	FAAA_MOUSE	Fah	Fumarylacetoacetase
P35550	FBRL_MOUSE	Fbl	rRNA 2-O-methyltransferase fibrillarin		0.00494879	-0.00371469	10	10	8	44.6	44.6	37	34.306	0	31.899	659730000	119	25.8886	26.0396	25.7761	25.9393	25.6845	26.379	26.5683	26.0077	26.9136	26.556	25.8147		P35550	FBRL_MOUSE	Fbl	rRNA 2-O-methyltransferase fibrillarin
P35564	CALX_MOUSE	Canx	Calnexin		0.402083	0.0435303	28	28	28	47.9	47.9	47.9	67.277	0	323.31	7053800000	889	27.5679	27.5919	27.7305	27.5281	27.494	27.6805	27.4748	27.5973	27.5226	27.637	27.5269		P35564	CALX_MOUSE	Canx	Calnexin
Q543V3	Q543V3_MOUSE	Irs1	Insulin receptor substrate 1		0.0114148	0.00432612	15	15	15	17.8	17.8	17.8	130.58	0	25.613	288140000	61	23.648	23.6368	23.8211	23.1868	23.5578	23.9803	23.6581	23.6707	23.6841	23.8292	23.5241		Q543V3	Q543V3_MOUSE	Irs1	Insulin receptor substrate 1
P35585	AP1M1_MOUSE	Ap1m1	AP-1 complex subunit mu-1		0.159519	-0.0253656	19	16	16	53.2	45.2	45.2	48.542	0	143.96	1622500000	276	24.9691	25.1157	25.0201	25.0858	25.0937	24.8841	24.9904	25.0657	25.2339	24.97	24.9352		P35585	AP1M1_MOUSE	Ap1m1	AP-1 complex subunit mu-1
P35700	PRDX1_MOUSE	Prdx1	Peroxiredoxin-1		1.47754	0.258581	29	29	28	92	92	92	22.176	0	323.31	127870000000	3206	31.1737	31.2076	31.4702	31.4997	31.0345	31.5986	31.2661	30.9633	31.0495	31.442	31.236		P35700	PRDX1_MOUSE	Prdx1	Peroxiredoxin-1
P35762	CD81_MOUSE	Cd81	CD81 antigen		0.100782	-0.0819592	3	3	3	27.5	27.5	27.5	25.814	0	98.841	481500000	64	26.1504	26.5452	26.4063	26.2514	26.7819	25.0854	25.8405	25.4795	26.0337	26.0198	26.1811		P35762	CD81_MOUSE	Cd81	CD81 antigen
P35821	PTN1_MOUSE	Ptpn1	Tyrosine-protein phosphatase non-receptor type 1		0.0221931	-0.00850916	9	9	9	35.6	35.6	35.6	49.593	0	20.115	186110000	52	23.4153	23.5316	NaN	23.5676	23.4055	23.0345	23.7991	23.5291	23.482	23.5525	23.5657		P35821	PTN1_MOUSE	Ptpn1	Tyrosine-protein phosphatase non-receptor type 1
P35831	PTN12_MOUSE	Ptpn12	Tyrosine-protein phosphatase non-receptor type 12		0	NaN	3	3	3	5.2	5.2	5.2	86.525	0.0072464	3.1322	1267100	3	NaN	NaN	NaN	NaN	NaN	NaN	NaN	NaN	NaN	NaN	NaN		P35831	PTN12_MOUSE	Ptpn12	Tyrosine-protein phosphatase non-receptor type 12
P35846	FOLR1_MOUSE	Folr1	Folate receptor alpha		0.261809	0.0801942	10	10	10	38.4	38.4	38.4	29.449	0	284.52	3418700000	224	25.7848	26.0561	26.2772	25.7151	26.1837	26.2886	26.2265	26.0537	26.1509	26.2004	25.8215		P35846	FOLR1_MOUSE	Folr1	Folate receptor alpha
E9QAT0	E9QAT0_MOUSE	Fmr1	Synaptic functional regulator FMR1		0.740763	0.317763	7	6	6	13.9	12.6	12.6	66.169	0.00055294	7.8255	65052000	27	22.1784	22.3846	NaN	22.2144	22.006	NaN	21.974	NaN	NaN	21.4697	21.8391		E9QAT0	E9QAT0_MOUSE	Fmr1	Synaptic functional regulator FMR1
A0A1L1SRE8	A0A1L1SRE8_MOUSE	Ldlr	Low-density lipoprotein receptor		0.443958	-0.276839	13	13	13	23.5	23.5	23.5	89.44	0	35.876	292570000	74	23.3277	23.5965	23.5195	23.2489	23.264	23.1612	22.067	23.5331	23.9316	23.3396	22.9768		A0A1L1SRE8	A0A1L1SRE8_MOUSE	Ldlr	Low-density lipoprotein receptor
P35979	RL12_MOUSE	Rpl12	60S ribosomal protein L12		1.26777	-0.237646	10	10	10	59.4	59.4	59.4	17.804	0	323.31	24936000000	818	29.537	29.6267	29.0593	29.4391	29.6441	29.3623	29.4351	29.8191	29.528	29.7693	29.4352		P35979	RL12_MOUSE	Rpl12	60S ribosomal protein L12
P35980	RL18_MOUSE	Rpl18	60S ribosomal protein L18		1.27951	-0.27286	15	15	15	47.3	47.3	47.3	21.644	0	323.31	32101000000	1284	29.2206	29.2083	28.9909	29.0011	29.3696	29.3687	29.1684	29.4438	29.6319	29.728	29.1281		P35980	RL18_MOUSE	Rpl18	60S ribosomal protein L18
P36371	TAP2_MOUSE	Tap2	Antigen peptide transporter 2		0.120199	0.0667781	13	13	13	27.2	27.2	27.2	77.444	0	38.829	442930000	79	24.0755	23.9094	24.2325	23.7086	23.8011	24.0551	24.8338	24.4478	24.022	24.3292	23.811		P36371	TAP2_MOUSE	Tap2	Antigen peptide transporter 2
P36552	HEM6_MOUSE	Cpox	Oxygen-dependent coproporphyrinogen-III oxidase, mitochondrial		0.357289	-0.102557	17	17	17	42.2	42.2	42.2	49.714	0	85.956	819210000	191	24.3576	24.3968	24.3832	24.6883	24.9502	24.583	24.2896	24.5315	24.637	24.6669	24.2813		P36552	HEM6_MOUSE	Cpox	Oxygen-dependent coproporphyrinogen-III oxidase, mitochondrial
P36916	GNL1_MOUSE	Gnl1	Guanine nucleotide-binding protein-like 1		1.01146	0.431221	5	5	5	8.4	8.4	8.4	68.77	0.00053093	6.6906	256150000	38	25.9379	25.9732	26.1199	26.73	26.1181	26.6425	25.8699	25.6979	NaN	NaN	25.5896		P36916	GNL1_MOUSE	Gnl1	Guanine nucleotide-binding protein-like 1
P36993	PPM1B_MOUSE	Ppm1b	Protein phosphatase 1B		0.285618	-0.0754567	10	8	8	46.4	40.8	40.8	42.795	0	41.492	378650000	64	23.4383	23.6401	23.3627	23.3819	23.605	23.004	23.2268	23.2539	23.3586	23.4764	23.259		P36993	PPM1B_MOUSE	Ppm1b	Protein phosphatase 1B
P37040	NCPR_MOUSE	Por	NADPH--cytochrome P450 reductase		0.44838	-0.0767981	39	39	39	59.6	59.6	59.6	77.043	0	323.31	7367600000	1051	27.3946	27.327	27.5216	27.1748	27.3988	27.1551	27.3178	27.3631	27.5537	27.1943	27.3519		P37040	NCPR_MOUSE	Por	NADPH--cytochrome P450 reductase
P37804	TAGL_MOUSE	Tagln	Transgelin		0.316064	0.043203	26	26	26	88.6	88.6	88.6	22.576	0	323.31	29455000000	1947	29.718	29.7541	29.7366	29.7453	29.665	29.8633	29.8725	29.6499	29.7353	29.9704	29.7685		P37804	TAGL_MOUSE	Tagln	Transgelin
P37889	FBLN2_MOUSE	Fbln2	Fibulin-2		1.24802	0.553704	4	4	4	5.9	5.9	5.9	131.83	0.0015182	5.4282	88281000	17	23.5262	NaN	24.6588	24.2701	23.9166	24.3227	23.8226	NaN	NaN	23.7017	NaN		P37889	FBLN2_MOUSE	Fbln2	Fibulin-2
P38060	HMGCL_MOUSE	Hmgcl	Hydroxymethylglutaryl-CoA lyase, mitochondrial		0.173737	-0.050075	15	15	15	52.9	52.9	52.9	34.238	0	216.59	2747300000	414	26.9824	26.7846	26.8881	26.975	26.7516	26.541	26.7505	26.9166	27.0032	26.4599	26.9136		P38060	HMGCL_MOUSE	Hmgcl	Hydroxymethylglutaryl-CoA lyase, mitochondrial
P38647	GRP75_MOUSE	Hspa9	Stress-70 protein, mitochondrial		0.187199	-0.0441871	38	38	38	56.4	56.4	56.4	73.46	0	323.31	18840000000	1705	27.3839	27.4827	27.5682	27.5604	27.5557	27.8392	27.3885	27.7873	27.7033	27.6907	27.551		P38647	GRP75_MOUSE	Hspa9	Stress-70 protein, mitochondrial
E9QPX1	E9QPX1_MOUSE	Col18a1	Collagen alpha-1(XVIII) chain		0.221312	-0.101298	3	3	3	1.6	1.6	1.6	182.29	0.00030807	11.97	96880000	22	23.688	23.2738	23.739	23.2656	23.2348	NaN	23.5334	23.2616	NaN	23.9608	23.6261		E9QPX1	E9QPX1_MOUSE	Col18a1	Collagen alpha-1(XVIII) chain
P39098	MA1A2_MOUSE	Man1a2	Mannosyl-oligosaccharide 1,2-alpha-mannosidase IB		0	NaN	7	7	7	12.8	12.8	12.8	72.871	0.0012814	5.689	25507000	12	NaN	NaN	NaN	NaN	NaN	NaN	NaN	NaN	NaN	NaN	NaN		P39098	MA1A2_MOUSE	Man1a2	Mannosyl-oligosaccharide 1,2-alpha-mannosidase IB
P39447	ZO1_MOUSE	Tjp1	Tight junction protein ZO-1		0.0502275	0.0141315	31	31	7	25.8	25.8	7.2	194.74	0	141.25	833000000	209	23.9058	23.7186	23.8094	23.6974	23.6631	23.8171	24.07	23.9648	23.8882	23.9124	23.5159		P39447	ZO1_MOUSE	Tjp1	Tight junction protein ZO-1
P39654	LOX15_MOUSE	Alox15	Polyunsaturated fatty acid lipoxygenase ALOX15		0	NaN	3	3	3	6.2	6.2	6.2	75.444	0.00028369	8.7218	56977000	8	NaN	NaN	NaN	NaN	NaN	NaN	NaN	23.9607	NaN	22.8321	NaN		P39654	LOX15_MOUSE	Alox15	Polyunsaturated fatty acid lipoxygenase ALOX15
P40124	CAP1_MOUSE	Cap1	Adenylyl cyclase-associated protein 1		0.441811	0.108213	33	33	33	71.1	71.1	71.1	51.564	0	323.31	22834000000	1647	28.7817	28.8694	28.7406	28.7378	28.3796	28.3004	28.6935	28.4285	28.509	28.5504	28.7116		P40124	CAP1_MOUSE	Cap1	Adenylyl cyclase-associated protein 1
P40142	TKT_MOUSE	Tkt	Transketolase		0.613465	0.0960025	67	67	67	93.9	93.9	93.9	67.63	0	323.31	385140000000	11250	31.9245	31.8916	32.1221	31.9395	31.9474	32.0071	31.8174	31.9508	31.687	31.6844	31.9631		P40142	TKT_MOUSE	Tkt	Transketolase
P40237	CD82_MOUSE	Cd82	CD82 antigen		0	NaN	5	5	5	16.9	16.9	16.9	29.628	0.001519	5.4322	1517000000	21	NaN	NaN	NaN	NaN	NaN	NaN	NaN	NaN	NaN	NaN	NaN		P40237	CD82_MOUSE	Cd82	CD82 antigen
P40240	CD9_MOUSE	Cd9	CD9 antigen		0	0.135272	3	3	3	16.4	16.4	16.4	25.258	0	27.875	54925000	19	NaN	23.5634	22.9217	22.485	NaN	22.4747	NaN	NaN	NaN	NaN	22.7259		P40240	CD9_MOUSE	Cd9	CD9 antigen
P40336	VP26A_MOUSE	Vps26a	Vacuolar protein sorting-associated protein 26A		0.423757	0.0566057	15	15	13	53.2	53.2	51.1	38.113	0	83.139	1209600000	165	25.2327	25.3514	25.2981	25.16	25.1812	25.2353	25.3228	25.1944	25.0269	25.2982	25.3681		P40336	VP26A_MOUSE	Vps26a	Vacuolar protein sorting-associated protein 26A
P40630	TFAM_MOUSE	Tfam	Transcription factor A, mitochondrial		0.774403	-0.491863	3	3	3	10.7	10.7	10.7	27.987	0.0045767	3.6322	157140000	18	23.4828	23.3481	22.7856	22.2416	NaN	NaN	22.6683	22.9187	NaN	NaN	23.3568		P40630	TFAM_MOUSE	Tfam	Transcription factor A, mitochondrial
P40936	INMT_MOUSE	Inmt	Indolethylamine N-methyltransferase		0.170855	-0.149179	5	5	5	30.7	30.7	30.7	29.459	0	48.535	298010000	45	24.2471	24.2413	23.555	23.2771	23.8843	NaN	23.4531	23.0224	NaN	23.9694	NaN		P40936	INMT_MOUSE	Inmt	Indolethylamine N-methyltransferase
P41105	RL28_MOUSE	Rpl28	60S ribosomal protein L28		0.218317	0.0651746	11	11	11	42.3	42.3	42.3	15.733	0	122.9	10468000000	594	30.7676	30.5479	30.7656	30.6212	30.3946	31.1346	30.5201	30.6614	30.6841	30.8122	30.5964		P41105	RL28_MOUSE	Rpl28	60S ribosomal protein L28
P41216	ACSL1_MOUSE	Acsl1	Long-chain-fatty-acid--CoA ligase 1		0.381497	-0.0472228	66	66	63	80.1	80.1	79	77.951	0	323.31	258450000000	9325	31.8492	31.689	31.8699	31.6959	31.8057	31.8011	31.6571	31.8879	31.6754	31.8466	31.6741		P41216	ACSL1_MOUSE	Acsl1	Long-chain-fatty-acid--CoA ligase 1
P41241	CSK_MOUSE	Csk	Tyrosine-protein kinase CSK		0.015137	0.00467377	12	12	12	32	32	32	50.716	0	19.611	681040000	113	25.8261	25.7795	25.7755	25.6883	25.4093	25.8725	25.744	25.6477	26.0855	25.8667	25.7683		P41241	CSK_MOUSE	Csk	Tyrosine-protein kinase CSK
P41245	MMP9_MOUSE	Mmp9	Matrix metalloproteinase-9		0	0.46823	4	4	4	7.1	7.1	7.1	80.534	0.0015263	5.5269	54196000	11	NaN	25.5345	NaN	NaN	NaN	NaN	24.9726	NaN	NaN	NaN	24.7853		P41245	MMP9_MOUSE	Mmp9	Matrix metalloproteinase-9
P41317	MBL2_MOUSE	Mbl2	Mannose-binding protein C		0.604317	-0.785213	3	3	3	15.2	15.2	15.2	25.957	0.00052924	6.6031	22114000	18	20.3585	NaN	NaN	20.3757	21.1694	NaN	19.2684	20.2939	NaN	NaN	NaN		P41317	MBL2_MOUSE	Mbl2	Mannose-binding protein C
P42125	ECI1_MOUSE	Eci1	Enoyl-CoA delta isomerase 1, mitochondrial		1.91838	-0.257466	15	15	15	61.6	61.6	61.6	32.25	0	273.82	8281900000	592	28.2461	28.0648	28.0965	28.0725	28.1848	28.246	28.2462	28.6173	28.4643	28.4997	28.4038		P42125	ECI1_MOUSE	Eci1	Enoyl-CoA delta isomerase 1, mitochondrial
P42208	SEPT2_MOUSE	Septin2	Septin-2		0.81531	0.18359	18	18	18	60.1	60.1	60.1	41.525	0	279.35	2183100000	335	25.8638	25.8513	25.6298	25.9151	25.6433	25.6464	25.7188	25.3749	25.234	25.5456	25.7508		P42208	SEPT2_MOUSE	Septin2	Septin-2
P42227	STAT3_MOUSE	Stat3	Signal transducer and activator of transcription 3		3.26431	0.281434	37	37	37	62.3	62.3	62.3	88.053	0	323.31	3477500000	602	26.1386	26.2889	26.394	26.4001	25.9305	26.2308	26.3757	25.9412	26.1014	26.0667	26.1605		P42227	STAT3_MOUSE	Stat3	Signal transducer and activator of transcription 3
P42230	STA5A_MOUSE	Stat5a	Signal transducer and activator of transcription 5A		1.00395	0.115461	25	25	9	40.7	40.7	18.2	90.83	0	118.08	1716600000	249	25.2956	25.4561	25.4342	25.2777	25.3182	25.4105	25.439	25.4915	25.1544	25.3048	25.1638		P42230	STA5A_MOUSE	Stat5a	Signal transducer and activator of transcription 5A
P42232	STA5B_MOUSE	Stat5b	Signal transducer and activator of transcription 5B		0.144965	-0.0811161	22	6	6	36.4	13.6	13.6	90.001	0	72.95	183510000	30	24.7723	24.7981	24.8449	25.0779	24.9271	24.1585	24.9199	NaN	NaN	NaN	24.8234		P42232	STA5B_MOUSE	Stat5b	Signal transducer and activator of transcription 5B
Q5JC28	Q5JC28_MOUSE	Eps15	Epidermal growth factor receptor pathway substrate 15 isoform B		0.0992836	-0.0288436	20	20	20	33	33	33	86.677	0	145.7	676690000	186	25.5242	25.5956	25.4767	25.4836	25.8351	25.3608	25.3241	25.4974	25.1606	25.3832	25.4614		Q5JC28	Q5JC28_MOUSE	Eps15	Epidermal growth factor receptor pathway substrate 15 isoform B
P42669	PURA_MOUSE	Pura	Transcriptional activator protein Pur-alpha		0.798294	-0.129992	12	12	11	38.6	38.6	36.4	34.883	0	323.31	704620000	177	25.2543	25.1471	25.2737	25.2241	25.2598	24.9798	25.1954	25.3516	25.5758	25.2083	25.1143		P42669	PURA_MOUSE	Pura	Transcriptional activator protein Pur-alpha
P42703	LIFR_MOUSE	Lifr	Leukemia inhibitory factor receptor		1.02652	-0.434875	11	11	11	13.6	13.6	13.6	122.57	0	25.103	203750000	53	23.2774	22.6648	22.9678	23.5546	23.6291	23.3588	22.7825	23.712	22.9457	24.0624	23.3768		P42703	LIFR_MOUSE	Lifr	Leukemia inhibitory factor receptor
P42859	HD_MOUSE	Htt	Huntingtin		0.797686	-0.100596	25	25	25	10.8	10.8	10.8	344.69	0	51.177	354700000	128	24.8923	24.8772	24.9475	24.7104	25.1637	24.8037	24.8546	24.9658	24.8044	24.9193	24.8901		P42859	HD_MOUSE	Htt	Huntingtin
P42932	TCPQ_MOUSE	Cct8	T-complex protein 1 subunit theta		0.681102	0.0783437	40	40	40	71.4	71.4	71.4	59.555	0	323.31	12697000000	1256	26.9324	27.174	27.1158	27.1704	27.0991	27.1403	27.027	26.9898	27.0641	27.2452	26.9524		P42932	TCPQ_MOUSE	Cct8	T-complex protein 1 subunit theta
P43024	CX6A1_MOUSE	Cox6a1	Cytochrome c oxidase subunit 6A1, mitochondrial		0.0214513	-0.0106932	4	4	4	61.3	61.3	61.3	12.352	0	133.06	11656000000	693	28.3077	28.918	28.7612	28.5238	28.4415	28.7671	28.5427	28.9581	29.007	29.1151	28.4501		P43024	CX6A1_MOUSE	Cox6a1	Cytochrome c oxidase subunit 6A1, mitochondrial
Q8CFZ6	Q8CFZ6_MOUSE	Clec3b	C-type lectin domain family 3, member b		0.590384	-0.191778	4	4	4	24.3	24.3	24.3	22.255	0.00028409	8.7381	54193000	30	21.4481	20.9649	20.9505	NaN	21.1854	21.4105	21.2462	NaN	21.6356	21.3809	21.024		Q8CFZ6	Q8CFZ6_MOUSE	Clec3b	C-type lectin domain family 3, member b
P43274	H14_MOUSE	H1-4	Histone H1.4		0.428347	0.171542	12	5	5	28.3	16	16	21.977	0	73.157	5977900000	197	28.006	28.1247	27.6585	27.5914	27.0743	27.8317	27.7037	27.5141	28.0161	27.4481	27.6043		P43274	H14_MOUSE	H1-4	Histone H1.4
P43275	H11_MOUSE	H1-1	Histone H1.1		0.627346	-0.245094	6	3	3	30	24.4	24.4	21.785	0	88.804	314310000	50	23.9653	23.5419	23.5636	23.3381	23.7516	23.4176	24.0676	23.4399	24.4319	23.6089	23.7876		P43275	H11_MOUSE	H1-1	Histone H1.1
P43276	H15_MOUSE	H1-5	Histone H1.5		0.755305	-0.30182	5	5	5	19.7	19.7	19.7	22.576	0	20.368	624620000	49	24.5823	24.5815	24.2649	23.7816	24.2549	24.4125	23.8627	24.1822	25.0523	24.2293	24.5936		P43276	H15_MOUSE	H1-5	Histone H1.5
P43277	H13_MOUSE	H1-3	Histone H1.3		0.230622	0.116152	11	2	2	28.1	9.5	9.5	22.099	0	18.715	508120000	64	24.374	24.2186	23.8776	23.9506	23.3164	24.2931	24.1667	NaN	24.3229	24.0089	23.9034		P43277	H13_MOUSE	H1-3	Histone H1.3
A2AKI5	A2AKI5_MOUSE	Itgav	Integrin alpha-V		0.161078	-0.0637256	14	14	14	16.1	16.1	16.1	111.51	0	59.882	2752900000	146	28.7431	28.7291	28.7995	28.5444	28.7756	29.0131	28.6946	28.5985	29.2022	29.1651	28.4348		A2AKI5	A2AKI5_MOUSE	Itgav	Integrin alpha-V
P43883	PLIN2_MOUSE	Plin2	Perilipin-2		0.519745	-0.0983121	21	21	21	62.8	62.8	62.8	46.646	0	323.31	5534500000	640	27.4214	27.3943	27.6845	27.7122	27.896	27.6574	27.5836	27.6954	27.6557	27.8116	27.7482		P43883	PLIN2_MOUSE	Plin2	Perilipin-2
P45376	ALDR_MOUSE	Akr1b1	Aldo-keto reductase family 1 member B1		0.0650145	0.0169175	19	19	19	59.8	59.8	59.8	35.732	0	323.31	10898000000	699	27.4283	27.434	27.3421	27.2327	26.9911	27.1184	27.3695	27.1449	27.393	27.3367	27.4006		P45376	ALDR_MOUSE	Akr1b1	Aldo-keto reductase family 1 member B1
P45377	ALD2_MOUSE	Akr1b8	Aldose reductase-related protein 2		1.92455	0.644909	12	8	7	54.4	42.1	39.2	36.12	0	20.463	292000000	34	23.8122	24.4826	24.4513	24.8658	23.5578	24.0733	24.441	NaN	23.6759	NaN	24.2257		P45377	ALD2_MOUSE	Akr1b8	Aldose reductase-related protein 2
A0A0U1RQB6	A0A0U1RQB6_MOUSE	Crebbp	Histone acetyltransferase		0	-0.280364	3	3	3	1.7	1.7	1.7	261.21	0.0088841	2.9346	41328000	12	NaN	NaN	NaN	24.5083	24.0924	23.1158	NaN	NaN	NaN	NaN	NaN		A0A0U1RQB6	A0A0U1RQB6_MOUSE	Crebbp	Histone acetyltransferase
P45591	COF2_MOUSE	Cfl2	Cofilin-2		0.0229376	0.0106339	14	13	13	71.1	64.5	64.5	18.709	0	58.297	884550000	174	24.2175	24.3244	23.9497	24.1084	23.8358	23.6065	24.0683	23.9052	24.4278	23.8905	23.7282		P45591	COF2_MOUSE	Cfl2	Cofilin-2
A0A1W2P788	A0A1W2P788_MOUSE	Man1a	alpha-1,2-Mannosidase (Fragment)		0.675341	-0.238874	7	7	7	14.8	14.8	14.8	82.042	0.00030166	10.951	205570000	33	23.0968	23.2636	22.5983	22.7596	22.8767	22.3013	22.515	23.0665	NaN	22.8626	22.7295		A0A1W2P788	A0A1W2P788_MOUSE	Man1a	alpha-1,2-Mannosidase (Fragment)
P45878	FKBP2_MOUSE	Fkbp2	Peptidyl-prolyl cis-trans isomerase FKBP2		0.456516	-0.156012	10	10	10	62.9	62.9	62.9	15.344	0	154.58	3302500000	306	27.1201	26.8669	27.2322	26.6861	26.8704	26.5786	26.2809	26.9896	26.769	26.696	26.8646		P45878	FKBP2_MOUSE	Fkbp2	Peptidyl-prolyl cis-trans isomerase FKBP2
P45952	ACADM_MOUSE	Acadm	Medium-chain specific acyl-CoA dehydrogenase, mitochondrial		1.74173	-0.223543	22	22	22	52.3	52.3	52.3	46.481	0	254.21	3849600000	527	26.2959	26.2819	26.0931	26.2823	26.4046	26.438	26.2871	26.5038	26.6619	26.5973	26.5367		P45952	ACADM_MOUSE	Acadm	Medium-chain specific acyl-CoA dehydrogenase, mitochondrial
P46061	RAGP1_MOUSE	Rangap1	Ran GTPase-activating protein 1		0.152354	0.0426239	28	28	28	52.6	52.6	52.6	63.53	0	154.25	2306100000	350	27.3387	27.9171	27.4994	27.7197	27.6488	27.6659	27.4259	27.4969	27.7692	27.7756	27.5886		P46061	RAGP1_MOUSE	Rangap1	Ran GTPase-activating protein 1
P46412	GPX3_MOUSE	Gpx3	Glutathione peroxidase 3		0.487276	0.264963	7	7	7	34.5	34.5	34.5	25.424	0	31.896	1423100000	180	27.2197	27.1359	27.3138	27.5396	27.0013	27.9344	27.1202	26.9972	27.1676	27.9693	26.5078		P46412	GPX3_MOUSE	Gpx3	Glutathione peroxidase 3
P46414	CDN1B_MOUSE	Cdkn1b	Cyclin-dependent kinase inhibitor 1B		0	-1.81299	3	3	3	17.3	17.3	17.3	22.193	0.0012811	5.6794	51392000	11	NaN	NaN	22.4549	NaN	NaN	NaN	NaN	NaN	NaN	NaN	24.2679		P46414	CDN1B_MOUSE	Cdkn1b	Cyclin-dependent kinase inhibitor 1B
P46460	NSF_MOUSE	Nsf	Vesicle-fusing ATPase		0.826568	-0.0578363	40	40	40	53.4	53.4	53.4	82.613	0	198.18	3226600000	550	25.9985	25.9165	25.9798	25.7705	25.939	25.9253	25.8954	25.8913	25.9344	26.0018	25.9671		P46460	NSF_MOUSE	Nsf	Vesicle-fusing ATPase
P46467	VPS4B_MOUSE	Vps4b	Vacuolar protein sorting-associated protein 4B		0.484548	-0.0739952	18	18	15	50.9	50.9	43.7	49.419	0	91.841	2038200000	239	26.8027	26.9835	26.8503	26.7391	26.9896	26.7021	26.7079	26.7823	26.76	27.0389	26.85		P46467	VPS4B_MOUSE	Vps4b	Vacuolar protein sorting-associated protein 4B
P46471	PRS7_MOUSE	Psmc2	26S proteasome regulatory subunit 7		0.682109	0.0982955	34	34	34	74.8	74.8	74.8	48.647	0	323.31	5140400000	767	26.405	26.5154	26.6074	26.4423	26.4865	26.4398	26.5105	26.3191	26.6588	26.2896	26.2697		P46471	PRS7_MOUSE	Psmc2	26S proteasome regulatory subunit 7
P46638	RB11B_MOUSE	Rab11b	Ras-related protein Rab-11B		0.59468	0.083924	15	15	3	60.6	60.6	13.3	24.489	0	323.31	11009000000	746	27.0081	27.0273	27.0763	26.9238	26.7757	26.9247	27.0627	27.0547	26.8838	26.7452	27.0468		P46638	RB11B_MOUSE	Rab11b	Ras-related protein Rab-11B
P46664	PURA2_MOUSE	Adss2	Adenylosuccinate synthetase isozyme 2		0.422774	0.0877252	9	9	9	26.1	26.1	26.1	50.02	0	65.09	369210000	106	22.9171	22.8308	22.8008	22.996	23.0352	22.9976	22.8311	22.6516	22.5935	22.6572	22.9665		P46664	PURA2_MOUSE	Adss2	Adenylosuccinate synthetase isozyme 2
P46718	PDCD2_MOUSE	Pdcd2	Programmed cell death protein 2		0.464659	-0.229268	6	6	6	22.4	22.4	22.4	38.341	0	14.869	78731000	23	NaN	23.9816	23.7987	23.5374	NaN	23.7421	23.2137	23.9264	24.1884	23.5372	NaN		P46718	PDCD2_MOUSE	Pdcd2	Programmed cell death protein 2
E9QNH6	E9QNH6_MOUSE	Myo1b	Unconventional myosin-Ib		0.319516	0.203949	3	3	3	3.9	3.9	3.9	125.03	0.0014778	4.8553	53250000	18	21.4396	21.8012	NaN	21.9668	NaN	22.1993	NaN	22.0753	22.2161	21.4097	NaN		E9QNH6	E9QNH6_MOUSE	Myo1b	Unconventional myosin-Ib
P46737	BRCC3_MOUSE	Brcc3	Lys-63-specific deubiquitinase BRCC36		0.457861	0.0683893	12	12	12	57.7	57.7	57.7	33.34	0	68.393	1205800000	181	26.0859	26.3252	26.2446	26.228	26.1793	26.2314	26.1322	26.3628	25.952	26.251	26.1523		P46737	BRCC3_MOUSE	Brcc3	Lys-63-specific deubiquitinase BRCC36
P46935	NEDD4_MOUSE	Nedd4	E3 ubiquitin-protein ligase NEDD4		0.616723	0.12855	28	28	26	35.5	35.5	33	102.71	0	242.74	2736000000	442	26.7174	27.1824	26.9292	27.0044	26.8286	26.85	27.0021	26.697	27.2053	26.9944	26.7478		P46935	NEDD4_MOUSE	Nedd4	E3 ubiquitin-protein ligase NEDD4
G3UYW7	G3UYW7_MOUSE	Yap1	Transcriptional coactivator YAP1 (Fragment)		0	NaN	3	3	3	17.9	17.9	17.9	42.705	0	62.229	14636000	6	NaN	NaN	NaN	NaN	NaN	NaN	NaN	NaN	NaN	NaN	NaN		G3UYW7	G3UYW7_MOUSE	Yap1	Transcriptional coactivator YAP1 (Fragment)
P46978	STT3A_MOUSE	Stt3a	Dolichyl-diphosphooligosaccharide--protein glycosyltransferase subunit STT3A		0.0384876	-0.00806878	23	23	22	26.8	26.8	26.8	80.597	0	174.9	6344400000	506	26.6091	26.535	26.4706	26.5032	26.5285	26.5342	26.7689	26.6843	26.3389	26.631	26.6308		P46978	STT3A_MOUSE	Stt3a	Dolichyl-diphosphooligosaccharide--protein glycosyltransferase subunit STT3A
P47199	QOR_MOUSE	Cryz	Quinone oxidoreductase		0.860426	-0.188162	6	6	6	26.6	26.6	26.6	35.268	0	31.929	195200000	42	22.8131	22.9192	NaN	22.6351	22.8707	22.6143	22.6173	22.7008	22.8367	23.2578	22.8288		P47199	QOR_MOUSE	Cryz	Quinone oxidoreductase
Q9DBX5	Q9DBX5_MOUSE	Pla2g4a	Phospholipase A2		0.0707016	-0.0275916	6	6	6	8.2	8.2	8.2	84.267	0.00053191	6.7214	140840000	45	23.0451	23.325	23.2714	23.4126	23.228	23.1265	23.6361	23.3081	23.8026	23.3557	23.552		Q9DBX5	Q9DBX5_MOUSE	Pla2g4a	Phospholipase A2
P47738	ALDH2_MOUSE	Aldh2	Aldehyde dehydrogenase, mitochondrial		0.791964	-0.190727	39	39	36	73	73	71.5	56.537	0	323.31	24091000000	1841	27.824	27.8383	27.9026	27.9599	28.0537	28.2318	27.9879	28.2907	28.3198	28.5032	28.0576		P47738	ALDH2_MOUSE	Aldh2	Aldehyde dehydrogenase, mitochondrial
P47740	AL3A2_MOUSE	Aldh3a2	Aldehyde dehydrogenase family 3 member A2		0.963446	-0.114784	19	19	19	48.6	48.6	48.6	53.97	0	96.695	2031400000	330	25.4001	25.4217	25.3404	25.3123	25.3859	25.372	25.3691	25.4432	25.5948	25.6981	25.3454		P47740	AL3A2_MOUSE	Aldh3a2	Aldehyde dehydrogenase family 3 member A2
P47754	CAZA2_MOUSE	Capza2	F-actin-capping protein subunit alpha-2		0.0157545	-0.00328325	18	18	16	76.2	76.2	66.8	32.967	0	323.31	7193500000	681	28.1763	28.2062	28.0141	28.1436	27.9628	27.9403	27.8894	27.8872	28.1131	28.0645	28.048		P47754	CAZA2_MOUSE	Capza2	F-actin-capping protein subunit alpha-2
P47757	CAPZB_MOUSE	Capzb	F-actin-capping protein subunit beta		0.675038	-0.341404	18	1	1	65.7	4.7	4.7	31.345	0	178.68	188920000	87	23.5118	21.9268	22.6718	22.6546	23.1394	22.5834	22.474	22.2502	22.8428	22.2789	22.798		P47757	CAPZB_MOUSE	Capzb	F-actin-capping protein subunit beta
P47758	SRPRB_MOUSE	Srprb	Signal recognition particle receptor subunit beta		0.395096	-0.0443478	21	21	21	73.6	73.6	73.6	29.579	0	323.31	6957600000	647	26.995	26.9033	26.938	26.8303	27.0387	26.8876	26.9403	27.0661	26.8013	26.8798	26.8846		P47758	SRPRB_MOUSE	Srprb	Signal recognition particle receptor subunit beta
P47791	GSHR_MOUSE	Gsr	Glutathione reductase, mitochondrial		0.747297	0.164842	17	17	17	54.2	54.2	54.2	53.662	0	312.82	2247700000	338	26.1025	26.1693	25.902	26.0342	25.539	26.0282	26.04	25.6737	26.0436	26.0691	25.7916		P47791	GSHR_MOUSE	Gsr	Glutathione reductase, mitochondrial
Q8R5C0	Q8R5C0_MOUSE	Mtx1	Metaxin		0.376161	0.146228	10	10	1	34.1	34.1	3.2	35.646	0	39.785	562690000	102	25.5945	25.5559	25.716	25.944	25.7482	26.5283	25.8049	25.6409	25.8562	26.0989	25.6428		Q8R5C0	Q8R5C0_MOUSE	Mtx1	Metaxin
P47809	MP2K4_MOUSE	Map2k4	Dual specificity mitogen-activated protein kinase kinase 4		0.244057	0.0555923	11	11	11	34.5	34.5	34.5	44.113	0	30.52	487970000	89	23.8469	24.1124	24.0671	24.1474	24.2338	23.8472	24.2665	23.902	23.9936	24.0131	24.2058		P47809	MP2K4_MOUSE	Map2k4	Dual specificity mitogen-activated protein kinase kinase 4
P47811	MK14_MOUSE	Mapk14	Mitogen-activated protein kinase 14		0.372631	0.143644	14	14	14	53.6	53.6	53.6	41.287	0	45.157	612390000	128	24.8792	25.2947	24.9004	24.9277	25.0415	24.9147	25.159	24.8746	24.2961	24.9255	25.357		P47811	MK14_MOUSE	Mapk14	Mitogen-activated protein kinase 14
P47856	GFPT1_MOUSE	Gfpt1	Glutamine--fructose-6-phosphate aminotransferase [isomerizing] 1		1.18402	0.102573	35	35	28	63	63	50.9	78.538	0	323.31	5535600000	757	25.8969	26.2113	26.1033	25.9773	25.9286	25.9914	26.0033	25.9312	26.0455	25.907	26.0194		P47856	GFPT1_MOUSE	Gfpt1	Glutamine--fructose-6-phosphate aminotransferase [isomerizing] 1
P47857	PFKAM_MOUSE	Pfkm	ATP-dependent 6-phosphofructokinase, muscle type		0.2171	0.184554	28	24	23	43.5	38.6	37.8	85.268	0	139.66	1492000000	232	24.4591	25.7668	25.3784	25.7666	25.4364	24.5125	24.402	25.0315	24.736	25.6508	24.5703		P47857	PFKAM_MOUSE	Pfkm	ATP-dependent 6-phosphofructokinase, muscle type
H3BLB7	H3BLB7_MOUSE	Igfbp4	Insulin-like growth factor-binding protein 4		0	NaN	1	1	1	10.6	10.6	10.6	18.052	0.0092853	2.886	13687000	5	NaN	NaN	NaN	NaN	NaN	NaN	NaN	NaN	NaN	NaN	NaN		H3BLB7	H3BLB7_MOUSE	Igfbp4	Insulin-like growth factor-binding protein 4
P47911	RL6_MOUSE	Rpl6	60S ribosomal protein L6		1.17674	-0.13719	28	28	28	52	52	52	33.509	0	323.31	65504000000	2059	30.3289	30.1368	30.2232	30.0883	30.1278	30.0991	30.2351	30.4936	30.1807	30.364	30.2671		P47911	RL6_MOUSE	Rpl6	60S ribosomal protein L6
P47915	RL29_MOUSE	Rpl29	60S ribosomal protein L29		0.00635936	0.00508423	7	7	7	33.1	33.1	33.1	17.587	0	12.399	9577800000	292	29.3397	28.8569	29.674	29.1063	28.9595	30.0583	29.2539	29.5393	29.6388	29.9746	28.8569		P47915	RL29_MOUSE	Rpl29	60S ribosomal protein L29
H7BX88	H7BX88_MOUSE	Crat	Carnitine O-acetyltransferase		0.373447	-0.107554	16	16	16	30.6	30.6	30.6	68.644	0	113.38	1232000000	227	24.566	24.734	24.7364	24.5894	24.6199	24.9919	24.8741	25.0923	24.8832	25.0498	25.1451		H7BX88	H7BX88_MOUSE	Crat	Carnitine O-acetyltransferase
P47941	CRKL_MOUSE	Crkl	Crk-like protein		0.321572	0.0869718	12	12	12	49.5	49.5	49.5	33.83	0	55.386	716190000	178	25.2568	25.2176	25.3425	25.2435	25.0435	24.8733	24.9132	24.9912	24.9335	25.1951	24.7664		P47941	CRKL_MOUSE	Crkl	Crk-like protein
P47955	RLA1_MOUSE	Rplp1	60S acidic ribosomal protein P1		0.066304	-0.0327126	7	7	7	95.6	95.6	95.6	11.475	0	323.31	12101000000	721	31.3013	30.924	31.1955	31.0296	30.7533	30.9534	31.0154	31.0968	31.512	30.4645	31.2098		P47955	RLA1_MOUSE	Rplp1	60S acidic ribosomal protein P1
P47962	RL5_MOUSE	Rpl5	60S ribosomal protein L5		0.557401	-0.0922308	28	28	28	63.3	63.3	63.3	34.4	0	323.31	32875000000	1672	29.2036	28.9054	29.2185	28.8665	28.9048	29.0368	29.0972	29.0948	29.2465	29.1701	29.0829		P47962	RL5_MOUSE	Rpl5	60S ribosomal protein L5
P47963	RL13_MOUSE	Rpl13	60S ribosomal protein L13		0.482705	-0.148906	15	15	15	52.1	52.1	52.1	24.305	0	323.31	27871000000	1000	29.2714	28.9945	29.1481	28.8658	28.9604	29.4496	29.4035	29.3748	29.5619	29.5444	29.2145		P47963	RL13_MOUSE	Rpl13	60S ribosomal protein L13
P47968	RPIA_MOUSE	Rpia	Ribose-5-phosphate isomerase		0.741726	-0.0742284	10	10	10	41.3	41.3	41.3	32.45	0	123.64	1605200000	197	26.568	26.4302	26.6882	26.5187	26.7123	26.5563	26.508	26.5113	26.5858	26.6218	26.6879		P47968	RPIA_MOUSE	Rpia	Ribose-5-phosphate isomerase
P48024	EIF1_MOUSE	Eif1	Eukaryotic translation initiation factor 1		0.53127	0.0779769	12	12	12	85.8	85.8	85.8	12.746	0	323.31	4797200000	450	27.3174	27.4587	27.691	27.4318	27.5073	27.4195	27.2695	27.3289	27.3229	27.356	27.4241		P48024	EIF1_MOUSE	Eif1	Eukaryotic translation initiation factor 1
E9PWE9	E9PWE9_MOUSE	Syk	Tyrosine-protein kinase		0.390832	-0.112222	7	7	7	19.7	19.7	19.7	66.066	0	12.484	77567000	27	NaN	NaN	NaN	NaN	24.0539	23.9071	23.8541	24.1033	NaN	23.7551	24.059		E9PWE9	E9PWE9_MOUSE	Syk	Tyrosine-protein kinase
P48036	ANXA5_MOUSE	Anxa5	Annexin A5		0.14401	0.0282037	33	33	33	79.9	79.9	79.9	35.752	0	323.31	25086000000	1793	28.538	28.4604	28.4179	28.372	28.3935	28.306	28.2581	28.0995	28.3026	28.4158	28.2586		P48036	ANXA5_MOUSE	Anxa5	Annexin A5
A2A839	A2A839_MOUSE	Epb41	Band 4.1		0.657398	-0.170577	16	15	7	30.4	28.6	13.1	72.423	0	41.067	644310000	118	23.728	23.7775	23.5266	23.5658	23.6626	23.5951	23.7197	24.0935	24.1674	23.735	23.4586		A2A839	A2A839_MOUSE	Epb41	Band 4.1
P48281	VDR_MOUSE	Vdr	Vitamin D3 receptor		0	NaN	3	3	3	10.2	10.2	10.2	47.833	0.003748	3.9765	34912000	10	NaN	23.6754	23.6594	NaN	NaN	NaN	NaN	NaN	NaN	NaN	NaN		P48281	VDR_MOUSE	Vdr	Vitamin D3 receptor
A0A1Y7VJ48	A0A1Y7VJ48_MOUSE	Tbca	Tubulin-specific chaperone A		1.40326	-0.218556	11	11	11	78.6	78.6	78.6	9.9271	0	323.31	1874000000	330	25.2762	25.298	25.1465	25.112	25.6254	25.0309	25.2503	25.4925	25.1143	25.3786	25.4297		A0A1Y7VJ48	A0A1Y7VJ48_MOUSE	Tbca	Tubulin-specific chaperone A
G3X8U7	G3X8U7_MOUSE	Ppp3cb	Serine/threonine-protein phosphatase		0	0.0932789	9	4	4	22.5	9.7	9.7	58.131	0.00055081	7.7076	67314000	9	NaN	22.5037	NaN	22.3067	22.3119	NaN	NaN	NaN	NaN	NaN	NaN		G3X8U7	G3X8U7_MOUSE	Ppp3cb	Serine/threonine-protein phosphatase
P48678	LMNA_MOUSE	Lmna	Prelamin-A/C		0.539649	0.128601	43	43	43	59.7	59.7	59.7	74.237	0	200.82	4181700000	494	25.7145	26.158	25.7556	25.8555	25.6813	26.1478	25.9612	25.9474	26.0899	26.0222	25.6269		P48678	LMNA_MOUSE	Lmna	Prelamin-A/C
P48722	HS74L_MOUSE	Hspa4l	Heat shock 70 kDa protein 4L		1.29323	0.147528	21	18	18	32.7	30	30	94.381	0	73.916	531130000	156	23.6187	23.7076	23.7716	23.7041	23.7663	23.718	23.774	23.3955	23.4397	23.6374	23.6675		P48722	HS74L_MOUSE	Hspa4l	Heat shock 70 kDa protein 4L
P48758	CBR1_MOUSE	Cbr1	Carbonyl reductase [NADPH] 1		1.13811	-0.151745	24	24	17	80.1	80.1	61.4	30.641	0	323.31	8921600000	914	27.7251	27.6917	27.5808	27.5586	27.5795	27.5968	27.7354	27.8008	27.8017	28.0424	27.7568		P48758	CBR1_MOUSE	Cbr1	Carbonyl reductase [NADPH] 1
P48760	FOLC_MOUSE	Fpgs	Folylpolyglutamate synthase, mitochondrial		0.0996566	-0.0870879	5	5	5	13.5	13.5	13.5	64.955	0.00028433	8.7632	108040000	25	23.707	24.2538	24.2143	23.768	23.7783	NaN	NaN	NaN	24.6097	NaN	24.5681		P48760	FOLC_MOUSE	Fpgs	Folylpolyglutamate synthase, mitochondrial
P48771	CX7A2_MOUSE	Cox7a2	Cytochrome c oxidase subunit 7A2, mitochondrial		0.233696	0.0847115	4	4	4	56.6	56.6	56.6	9.2908	0	162.25	3768600000	159	26.6451	26.3588	27.153	26.8761	26.8681	26.8618	27.0753	26.6835	27.086	26.5985	26.8006		P48771	CX7A2_MOUSE	Cox7a2	Cytochrome c oxidase subunit 7A2, mitochondrial
P48774	GSTM5_MOUSE	Gstm5	Glutathione S-transferase Mu 5		0.144222	0.0428591	14	13	13	59.8	55.8	55.8	26.635	0	38.091	794850000	186	25.6993	26.0311	25.6601	25.5705	25.8608	25.6488	26.0962	25.6629	25.7406	25.6188	25.9684		P48774	GSTM5_MOUSE	Gstm5	Glutathione S-transferase Mu 5
P48962	ADT1_MOUSE	Slc25a4	ADP/ATP translocase 1		0.541134	0.173679	24	11	11	64.8	30.2	30.2	32.904	0	46.683	3239200000	265	26.4713	26.8362	26.8033	26.9095	26.7123	27.209	26.4834	26.879	26.5034	27.0474	26.4343		P48962	ADT1_MOUSE	Slc25a4	ADP/ATP translocase 1
P49138	MAPK2_MOUSE	Mapkapk2	MAP kinase-activated protein kinase 2		0.414517	0.166976	5	5	3	15.3	15.3	10.1	44.049	0.0016896	4.4679	96511000	25	24.3171	NaN	24.1092	24.3595	NaN	NaN	24.0215	NaN	23.9895	23.9981	23.681		P49138	MAPK2_MOUSE	Mapkapk2	MAP kinase-activated protein kinase 2
P49182	HEP2_MOUSE	Serpind1	Heparin cofactor 2		0.0989121	-0.0384489	11	11	11	28.9	28.9	28.9	54.496	0	31.211	1506600000	219	26.3373	25.9686	26.1025	25.86	26.2857	26.294	26.5395	25.9925	26.4661	26.1483	25.9183		P49182	HEP2_MOUSE	Serpind1	Heparin cofactor 2
P49183	DNAS1_MOUSE	Dnase1	Deoxyribonuclease-1		0	NaN	8	8	8	25	25	25	32.027	0	53.462	777580000	33	NaN	NaN	NaN	NaN	NaN	NaN	NaN	NaN	NaN	NaN	NaN		P49183	DNAS1_MOUSE	Dnase1	Deoxyribonuclease-1
P49282	NRAM2_MOUSE	Slc11a2	Natural resistance-associated macrophage protein 2		0.225907	-0.140755	3	3	3	10.9	10.9	10.9	62.367	0	22.828	198610000	40	24.2736	25.3194	24.7608	24.7047	25.3295	24.7934	24.3953	24.6755	25.0921	24.6752	25.567		P49282	NRAM2_MOUSE	Slc11a2	Natural resistance-associated macrophage protein 2
P49290	PERE_MOUSE	Epx	Eosinophil peroxidase		0.00144399	0.00404167	18	15	15	29.5	25.3	25.3	81.379	0	28.381	496790000	79	25.2123	NaN	25.2927	NaN	23.5025	26.2061	26.8459	26.9072	27.4685	26.9912	26.5836		P49290	PERE_MOUSE	Epx	Eosinophil peroxidase
A2CF65	A2CF65_MOUSE	Clec10a	C-type lectin domain family 10 member A (Fragment)		0.0145105	0.0118155	8	8	4	48.1	48.1	22	24.516	0	30.211	112510000	28	22.716	NaN	NaN	22.5355	22.1298	22.6504	22.7105	NaN	23.3468	22.4135	22.4955		A2CF65	A2CF65_MOUSE	Clec10a	C-type lectin domain family 10 member A (Fragment)
P49312	ROA1_MOUSE	Hnrnpa1	Heterogeneous nuclear ribonucleoprotein A1		0.329602	-0.144942	16	16	16	50.3	50.3	50.3	34.196	0	323.31	6401600000	678	26.7614	26.3682	26.4572	26.3467	26.2211	26.843	27.1417	26.894	26.9283	27.0323	26.8207		P49312	ROA1_MOUSE	Hnrnpa1	Heterogeneous nuclear ribonucleoprotein A1
P49442	INPP_MOUSE	Inpp1	Inositol polyphosphate 1-phosphatase		0.83693	-0.314267	8	8	8	26.5	26.5	26.5	43.346	0	20.931	200970000	76	22.6128	22.442	22.2679	22.3479	23.1573	21.8863	22.168	22.6758	22.3542	22.4507	21.9692		P49442	INPP_MOUSE	Inpp1	Inositol polyphosphate 1-phosphatase
P49443	PPM1A_MOUSE	Ppm1a	Protein phosphatase 1A		0.745661	-0.086141	13	13	11	42.1	42.1	36.4	42.432	0	82.918	594770000	131	23.8981	23.9623	23.7579	23.9462	24.0051	23.8999	23.9498	23.8762	23.9284	24.1381	24.0902		P49443	PPM1A_MOUSE	Ppm1a	Protein phosphatase 1A
P49586	PCY1A_MOUSE	Pcyt1a	Choline-phosphate cytidylyltransferase A		0.291783	0.060789	6	6	6	24.8	24.8	24.8	41.666	0	17.664	442840000	80	24.9965	25.2012	25.0853	25.1195	24.9771	25.2454	25.381	25.0699	25.133	25.3425	25.3551		P49586	PCY1A_MOUSE	Pcyt1a	Choline-phosphate cytidylyltransferase A
P49615	CDK5_MOUSE	Cdk5	Cyclin-dependent-like kinase 5		1.24148	0.229241	12	12	11	39	39	36.3	33.288	0	22.275	718070000	116	24.8175	25.1322	24.7015	24.8121	24.8589	25.0443	25.073	24.6158	24.6329	24.4996	24.9155		P49615	CDK5_MOUSE	Cdk5	Cyclin-dependent-like kinase 5
P49710	HCLS1_MOUSE	Hcls1	Hematopoietic lineage cell-specific protein		0.0215175	-0.0156254	7	7	7	16.3	16.3	16.3	54.24	0	35.908	364110000	55	24.4517	24.2843	23.8156	23.8151	23.8181	24.5254	25.0825	24.4287	24.2028	24.3642	24.6557		P49710	HCLS1_MOUSE	Hcls1	Hematopoietic lineage cell-specific protein
P49717	MCM4_MOUSE	Mcm4	DNA replication licensing factor MCM4		0	-0.482408	3	3	3	3.6	3.6	3.6	96.735	0.0016945	4.5223	26705000	15	NaN	20.8388	NaN	21.0209	NaN	NaN	20.9831	NaN	NaN	NaN	21.43		P49717	MCM4_MOUSE	Mcm4	DNA replication licensing factor MCM4
P49722	PSA2_MOUSE	Psma2	Proteasome subunit alpha type-2		0.377645	0.0913603	11	11	11	53	53	53	25.926	0	207.46	2769600000	376	27.4196	27.232	27.5526	27.2128	27.2431	27.1368	27.2113	27.0906	26.9822	26.9768	27.3541		P49722	PSA2_MOUSE	Psma2	Proteasome subunit alpha type-2
H3BKG0	H3BKG0_MOUSE	Cav1	Caveolin-1		0.473923	-0.111994	5	5	3	64.5	64.5	45.2	10.391	0	152.7	2245300000	150	26.2889	26.0595	26.255	25.8713	26.3414	25.9514	25.9872	25.9643	26.3409	25.971	25.9147		H3BKG0	H3BKG0_MOUSE	Cav1	Caveolin-1
P49935	CATH_MOUSE	Ctsh	Pro-cathepsin H		0.0361641	0.0210902	5	5	5	22.8	22.8	22.8	37.17	0	75.078	670320000	116	25.535	25.0547	25.1112	25.1707	24.9009	25.0786	24.8698	25.1571	25.0554	24.2521	25.3148		P49935	CATH_MOUSE	Ctsh	Pro-cathepsin H
P49962	SRP09_MOUSE	Srp9	Signal recognition particle 9 kDa protein		0.442859	0.0763823	7	7	7	58.1	58.1	58.1	10.194	0	171.47	1179800000	160	25.0055	25.0192	25.0063	24.8081	24.8247	25.073	24.9049	24.7354	24.716	25.0718	24.9622		P49962	SRP09_MOUSE	Srp9	Signal recognition particle 9 kDa protein
E0CYE2	E0CYE2_MOUSE	Impdh1	Inosine-5-monophosphate dehydrogenase		0.0767926	-0.0343825	11	10	10	28.6	27	27	52.47	0	48.151	258250000	71	23.5664	23.9845	23.5232	23.6537	23.7488	23.7966	23.6006	23.5655	24.2481	23.9856	23.3623		E0CYE2	E0CYE2_MOUSE	Impdh1	Inosine-5-monophosphate dehydrogenase
P50171	DHB8_MOUSE	Hsd17b8	Estradiol 17-beta-dehydrogenase 8		0.25479	-0.0637812	8	8	8	45.2	45.2	45.2	26.588	0	143.25	1090000000	171	25.0602	25.2513	25.1937	25.2162	25.1961	25.3363	25.3274	25.6025	25.2173	25.5983	25.2982		P50171	DHB8_MOUSE	Hsd17b8	Estradiol 17-beta-dehydrogenase 8
P50172	DHI1_MOUSE	Hsd11b1	Corticosteroid 11-beta-dehydrogenase isozyme 1		0.376437	-0.245417	6	6	6	23.3	23.3	23.3	32.364	0	71.252	186080000	50	NaN	24.362	24.2748	24.4744	24.88	23.7507	24.971	24.5136	24.0701	NaN	24.9843		P50172	DHI1_MOUSE	Hsd11b1	Corticosteroid 11-beta-dehydrogenase isozyme 1
P50247	SAHH_MOUSE	Ahcy	Adenosylhomocysteinase		0.567195	0.0798336	30	30	30	64.8	64.8	64.8	47.688	0	323.31	12265000000	821	27.5601	27.69	27.6004	27.4787	27.3137	27.6058	27.7443	27.5496	27.6463	27.6385	27.5558		P50247	SAHH_MOUSE	Ahcy	Adenosylhomocysteinase
P50285	FMO1_MOUSE	Fmo1	Dimethylaniline monooxygenase [N-oxide-forming] 1		1.86111	-0.549577	11	11	11	27.4	27.4	27.4	59.914	0	25.656	347690000	73	24.1582	24.2381	23.5299	24.0824	24.4522	24.0427	24.1765	24.6292	24.9788	24.832	24.3303		P50285	FMO1_MOUSE	Fmo1	Dimethylaniline monooxygenase [N-oxide-forming] 1
P50295	ARY2_MOUSE	Nat2	Arylamine N-acetyltransferase 2		0.0553701	0.0534756	3	3	3	15.5	15.5	15.5	33.701	0	14.32	38349000	38	23.3597	22.7683	22.1433	NaN	NaN	NaN	22.6163	22.2595	22.433	22.1185	22.1085		P50295	ARY2_MOUSE	Nat2	Arylamine N-acetyltransferase 2
P50396	GDIA_MOUSE	Gdi1	Rab GDP dissociation inhibitor alpha		0.245008	0.0580784	34	25	25	80.5	68.7	68.7	50.521	0	204.77	1183300000	318	25.8061	25.7698	25.6646	25.9149	25.7596	25.5275	25.5171	25.4026	25.5772	25.6853	25.4933		P50396	GDIA_MOUSE	Gdi1	Rab GDP dissociation inhibitor alpha
P50404	SFTPD_MOUSE	Sftpd	Pulmonary surfactant-associated protein D		1.62068	0.766348	4	4	4	15.2	15.2	15.2	37.688	0.0003059	11.561	176500000	35	22.9169	NaN	23.0016	23.3419	22.9446	23.7616	23.359	22.7953	NaN	22.4813	21.8605		P50404	SFTPD_MOUSE	Sftpd	Pulmonary surfactant-associated protein D
P50428	ARSA_MOUSE	Arsa	Arylsulfatase A		0	NaN	3	3	3	12.5	12.5	12.5	53.748	0.0016795	4.3552	29299000	13	NaN	NaN	NaN	23.0863	NaN	NaN	23.26	NaN	NaN	NaN	NaN		P50428	ARSA_MOUSE	Arsa	Arylsulfatase A
P50431	GLYC_MOUSE	Shmt1	Serine hydroxymethyltransferase, cytosolic		0.650782	-0.155746	19	18	18	54.2	51.3	51.3	52.6	0	127.83	1978100000	232	25.6247	25.69	25.3521	25.6312	25.8593	25.1099	25.3959	25.5755	25.4284	25.6395	25.422		P50431	GLYC_MOUSE	Shmt1	Serine hydroxymethyltransferase, cytosolic
P50516	VATA_MOUSE	Atp6v1a	V-type proton ATPase catalytic subunit A		0.895314	0.0990895	45	45	45	91.9	91.9	91.9	68.325	0	323.31	14352000000	1551	27.9443	27.9765	27.9815	28.0612	27.8962	27.9574	27.9641	27.8123	27.7151	27.8798	28.0865		P50516	VATA_MOUSE	Atp6v1a	V-type proton ATPase catalytic subunit A
P50518	VATE1_MOUSE	Atp6v1e1	V-type proton ATPase subunit E 1		0.366143	0.0607119	13	13	13	53.5	53.5	53.5	26.157	0	323.31	2697300000	474	25.6132	25.6448	25.5967	25.4887	25.606	25.5021	25.3477	25.3646	25.3108	25.3971	25.4399		P50518	VATE1_MOUSE	Atp6v1e1	V-type proton ATPase subunit E 1
P50543	S10AB_MOUSE	S100a11	Protein S100-A11		0.469085	0.265013	4	4	4	74.5	74.5	74.5	11.083	0	208.24	1342500000	217	27.2639	27.6134	27.312	27.8828	27.1202	26.5275	27.1978	26.6263	27.1338	26.5985	27.5075		P50543	S10AB_MOUSE	S100a11	Protein S100-A11
P50544	ACADV_MOUSE	Acadvl	Very long-chain specific acyl-CoA dehydrogenase, mitochondrial		0.49321	-0.127669	36	36	36	59	59	59	70.875	0	323.31	4337700000	622	26.0317	26.3339	26.085	26.2268	26.3478	26.5363	26.2698	26.4299	26.5769	26.6907	26.4312		P50544	ACADV_MOUSE	Acadvl	Very long-chain specific acyl-CoA dehydrogenase, mitochondrial
P50580	PA2G4_MOUSE	Pa2g4	Proliferation-associated protein 2G4		0.0179125	-0.0024093	29	29	29	69.3	69.3	69.3	43.698	0	323.31	22639000000	1579	28.5455	28.4735	28.5687	28.4299	28.3673	28.4833	28.472	28.587	28.3843	28.5487	28.4945		P50580	PA2G4_MOUSE	Pa2g4	Proliferation-associated protein 2G4
P50637	TSPO_MOUSE	Tspo	Translocator protein		0.320881	-0.282174	3	3	3	38.5	38.5	38.5	18.841	0	79.161	97581000	49	24.8725	24.3729	25.0185	NaN	24.8096	NaN	NaN	NaN	25.5665	NaN	24.6629		P50637	TSPO_MOUSE	Tspo	Translocator protein
P51150	RAB7A_MOUSE	Rab7a	Ras-related protein Rab-7a		0.0136231	-0.00211016	17	17	17	77.8	77.8	77.8	23.489	0	323.31	4982700000	561	27.2662	27.2832	27.3665	27.2445	27.1986	27.3083	27.3272	27.2383	27.3846	27.4936	27.267		P51150	RAB7A_MOUSE	Rab7a	Ras-related protein Rab-7a
P51163	HEM4_MOUSE	Uros	Uroporphyrinogen-III synthase		0.606464	-0.182136	4	4	4	20.8	20.8	20.8	28.504	0.00028927	9.4107	123740000	37	24.4101	24.1205	24.2594	24.1565	24.5141	24.7224	NaN	24.5437	NaN	NaN	24.5194		P51163	HEM4_MOUSE	Uros	Uroporphyrinogen-III synthase
P51175	PPOX_MOUSE	Ppox	Protoporphyrinogen oxidase		0.155616	-0.0344139	9	9	9	34.4	34.4	34.4	50.87	0	19.817	147180000	47	23.3773	23.486	23.6073	23.6824	23.5254	23.3752	23.5417	23.7136	23.5665	23.802	23.4527		P51175	PPOX_MOUSE	Ppox	Protoporphyrinogen oxidase
P51410	RL9_MOUSE	Rpl9	60S ribosomal protein L9		0.251901	0.056842	18	18	2	79.7	79.7	9.4	21.881	0	323.31	18032000000	1329	28.6869	28.7834	28.375	28.6035	28.7575	28.6324	28.7937	28.3964	28.5988	28.6147	28.4303		P51410	RL9_MOUSE	Rpl9	60S ribosomal protein L9
P51432	PLCB3_MOUSE	Plcb3	1-phosphatidylinositol 4,5-bisphosphate phosphodiesterase beta-3		0.0031147	-0.00156358	10	10	10	11.7	11.7	11.7	139.49	0	61.878	116300000	36	24.4088	24.2865	23.9616	24.2508	24.4854	24.6322	24.0374	23.8166	24.2052	24.5343	23.9615		P51432	PLCB3_MOUSE	Plcb3	1-phosphatidylinositol 4,5-bisphosphate phosphodiesterase beta-3
P51437	CAMP_MOUSE	Camp	Cathelicidin antimicrobial peptide		0.258046	0.433887	2	2	2	19.8	19.8	19.8	19.453	0	202.43	132880000	31	22.033	23.405	21.5736	22.1611	21.95	21.3174	23.7684	NaN	NaN	20.8655	23.1963		P51437	CAMP_MOUSE	Camp	Cathelicidin antimicrobial peptide
P51660	DHB4_MOUSE	Hsd17b4	Peroxisomal multifunctional enzyme type 2		0.347779	0.0658005	32	32	32	54.8	54.8	54.8	79.481	0	323.31	6837400000	615	26.9557	27.1245	26.96	27.1607	26.9179	27.3675	27.1352	27.0441	27.2039	27.2258	27.1553		P51660	DHB4_MOUSE	Hsd17b4	Peroxisomal multifunctional enzyme type 2
P51807	DYLT1_MOUSE	Dynlt1	Dynein light chain Tctex-type 1		0.0115594	-0.00738087	3	3	3	51.3	51.3	51.3	12.483	0	227.25	889280000	69	25.7013	26.005	25.5429	25.6183	25.6428	24.8187	25.6002	25.6383	25.2015	25.1229	25.8398		P51807	DYLT1_MOUSE	Dynlt1	Dynein light chain Tctex-type 1
P51855	GSHB_MOUSE	Gss	Glutathione synthetase		0.962311	0.116536	20	20	20	57.4	57.4	57.4	52.246	0	233.27	1276000000	253	24.72	24.726	24.867	24.5974	24.6965	24.6782	24.8618	24.5571	24.6755	24.46	24.6682		P51855	GSHB_MOUSE	Gss	Glutathione synthetase
P51859	HDGF_MOUSE	Hdgf	Hepatoma-derived growth factor		0.191345	0.044688	17	17	16	72.2	72.2	68.8	26.268	0	323.31	6158200000	504	27.3525	27.4291	27.313	27.2087	26.9805	27.2768	27.3151	27.1478	27.5584	27.2704	27.2735		P51859	HDGF_MOUSE	Hdgf	Hepatoma-derived growth factor
P51863	VA0D1_MOUSE	Atp6v0d1	V-type proton ATPase subunit d 1		0.445221	0.0680017	14	14	14	41.6	41.6	41.6	40.301	0	95.03	2532600000	258	25.4698	25.4451	25.4495	25.372	25.4166	25.4951	25.4117	25.4419	25.0768	25.3335	25.4615		P51863	VA0D1_MOUSE	Atp6v0d1	V-type proton ATPase subunit d 1
P51881	ADT2_MOUSE	Slc25a5	ADP/ATP translocase 2		0.259591	-0.0644153	30	30	17	74.8	74.8	46.3	32.931	0	323.31	91631000000	2744	31.2499	31.1185	31.055	31.3374	31.2844	31.5433	31.0715	31.3146	31.2504	31.5202	31.1179		P51881	ADT2_MOUSE	Slc25a5	ADP/ATP translocase 2
P51885	LUM_MOUSE	Lum	Lumican		0.801363	0.12146	18	18	11	46.2	46.2	30.8	38.265	0	323.31	9092700000	590	28.0552	28.1342	28.0064	27.9779	27.8569	27.8666	28.0518	27.8298	27.9373	28.0045	27.6317		P51885	LUM_MOUSE	Lum	Lumican
P52019	ERG1_MOUSE	Sqle	Squalene monooxygenase		0.319716	-0.112412	16	16	16	48.8	48.8	48.8	63.769	0	171.04	1138100000	203	24.7343	24.888	24.6394	24.8379	24.9656	24.8737	24.5504	24.7237	25.2837	25.0956	24.4187		P52019	ERG1_MOUSE	Sqle	Squalene monooxygenase
P52196	THTR_MOUSE	Tst	Thiosulfate sulfurtransferase		0.721822	-0.160101	14	14	14	58.6	58.6	58.6	33.466	0	154.71	4191800000	268	26.1329	25.9691	26.3847	26.3211	26.4103	26.4253	26.3154	26.4209	26.5641	26.7046	26.4266		P52196	THTR_MOUSE	Tst	Thiosulfate sulfurtransferase
P52293	IMA1_MOUSE	Kpna2	Importin subunit alpha-1		0.0449998	0.0435545	8	8	8	22.7	22.7	22.7	57.927	0	97.868	158960000	34	NaN	24.1088	NaN	24.3065	23.5213	23.1439	NaN	23.7131	24.1037	NaN	23.8998		P52293	IMA1_MOUSE	Kpna2	Importin subunit alpha-1
B1ASP2	B1ASP2_MOUSE	Jak1	Tyrosine-protein kinase		0	NaN	6	6	6	5.9	5.9	5.9	133.35	0.00052192	6.2044	21076000	17	NaN	NaN	NaN	NaN	NaN	NaN	NaN	NaN	NaN	NaN	NaN		B1ASP2	B1ASP2_MOUSE	Jak1	Tyrosine-protein kinase
P52430	PON1_MOUSE	Pon1	Serum paraoxonase/arylesterase 1		0.224898	0.0954695	5	5	5	21.7	21.7	21.7	39.565	0	16.844	341190000	55	23.4034	23.3677	23.3905	23.3697	23.6103	23.2835	23.1366	23.2911	22.5133	23.1825	23.2842		P52430	PON1_MOUSE	Pon1	Serum paraoxonase/arylesterase 1
G3UXX5	G3UXX5_MOUSE	Polr1c	DNA-directed RNA polymerases I and III subunit RPAC1 (Fragment)		0.555609	-0.484399	3	3	3	25.9	25.9	25.9	19.379	0.00029833	10.539	27399000	17	NaN	20.4628	NaN	20.3081	NaN	NaN	NaN	NaN	21.1891	NaN	20.5507		G3UXX5	G3UXX5_MOUSE	Polr1c	DNA-directed RNA polymerases I and III subunit RPAC1 (Fragment)
P52479	UBP10_MOUSE	Usp10	Ubiquitin carboxyl-terminal hydrolase 10		0.0600908	0.018391	13	13	13	24.1	24.1	24.1	87.021	0	54.821	1085800000	180	25.7922	25.9781	25.9808	26.2016	26.3721	26.0338	25.9444	25.8794	26.0785	26.1258	25.8082		P52479	UBP10_MOUSE	Usp10	Ubiquitin carboxyl-terminal hydrolase 10
P52480	KPYM_MOUSE	Pkm	Pyruvate kinase PKM		1.00997	0.183827	69	69	69	92.3	92.3	92.3	57.844	0	323.31	323200000000	10182	31.2572	31.6866	31.3973	31.7235	31.2746	31.2132	31.2664	31.2548	31.3595	31.1749	31.3204		P52480	KPYM_MOUSE	Pkm	Pyruvate kinase PKM
P52503	NDUS6_MOUSE	Ndufs6	NADH dehydrogenase [ubiquinone] iron-sulfur protein 6, mitochondrial		0.173928	0.0397092	6	6	6	60.3	60.3	60.3	13.02	0	153.03	2334700000	243	25.8936	25.8405	26.0142	25.9004	25.6853	26.1856	25.8689	26.0585	26.1013	25.9705	25.824		P52503	NDUS6_MOUSE	Ndufs6	NADH dehydrogenase [ubiquinone] iron-sulfur protein 6, mitochondrial
A2AN37	A2AN37_MOUSE	Uck1	Uridine-cytidine kinase		0	NaN	4	4	3	15.9	15.9	13.1	31.669	0.0064761	3.3333	61368000	12	NaN	NaN	NaN	NaN	NaN	NaN	NaN	NaN	NaN	NaN	NaN		A2AN37	A2AN37_MOUSE	Uck1	Uridine-cytidine kinase
Q5SUC6	Q5SUC6_MOUSE	Upp1	Uridine phosphorylase 1 (Fragment)		0	NaN	3	3	3	35.8	35.8	35.8	15.025	0.0041754	3.8234	82711000	8	NaN	25.2501	NaN	24.4731	NaN	NaN	NaN	NaN	NaN	NaN	NaN		Q5SUC6	Q5SUC6_MOUSE	Upp1	Uridine phosphorylase 1 (Fragment)
P52633	STAT6_MOUSE	Stat6	Signal transducer and transcription activator 6		0.945267	0.376158	3	3	3	5.3	5.3	5.3	93.496	0.00029053	9.5043	175700000	43	25.1005	24.8218	25.2166	24.8081	24.4981	24.9622	25.4212	25.0032	24.6792	23.9575	24.7804		P52633	STAT6_MOUSE	Stat6	Signal transducer and transcription activator 6
P52825	CPT2_MOUSE	Cpt2	Carnitine O-palmitoyltransferase 2, mitochondrial		0.0536312	-0.0145705	32	32	32	62	62	62	73.98	0	229.92	3027100000	424	26.0351	25.9169	26.3241	26.1553	26.2145	26.3686	26.4147	26.3353	26.2915	26.3298	26.2968		P52825	CPT2_MOUSE	Cpt2	Carnitine O-palmitoyltransferase 2, mitochondrial
Q91W19	Q91W19_MOUSE	Sult1a1	Sulfotransferase		0.527095	-0.2732	4	4	4	15.6	15.6	15.6	30.519	0.0012857	5.7951	153490000	32	24.0422	23.3537	23.5008	22.728	23.3663	23.3408	23.7151	NaN	NaN	23.2703	23.7248		Q91W19	Q91W19_MOUSE	Sult1a1	Sulfotransferase
P52875	TM165_MOUSE	Tmem165	Transmembrane protein 165		1.50566	-0.469969	8	8	8	31.9	31.9	31.9	34.79	0	323.31	1993200000	332	25.7603	25.7063	25.2038	25.2924	26.1497	24.8924	25.087	25.4991	25.9544	25.5357	25.3386		P52875	TM165_MOUSE	Tmem165	Transmembrane protein 165
P53395	ODB2_MOUSE	Dbt	Lipoamide acyltransferase component of branched-chain alpha-keto acid dehydrogenase complex, mitochondrial		0.839695	-0.173892	21	21	21	55.8	55.8	55.8	53.246	0	189.28	2677000000	382	25.5994	25.5103	25.8742	25.4851	25.8239	25.5763	25.5289	26.0264	25.8451	25.8337	25.4844		P53395	ODB2_MOUSE	Dbt	Lipoamide acyltransferase component of branched-chain alpha-keto acid dehydrogenase complex, mitochondrial
Q3TVF4	Q3TVF4_MOUSE	Rabggtb	Geranylgeranyl transferase type-2 subunit beta		0.871688	-0.224249	6	6	6	23.6	23.6	23.6	36.884	0	15.542	204440000	34	23.8703	23.5186	23.7458	23.5065	23.5728	23.7227	23.5248	24.1856	NaN	NaN	23.683		Q3TVF4	Q3TVF4_MOUSE	Rabggtb	Geranylgeranyl transferase type-2 subunit beta
A0A571BEK9	A0A571BEK9_MOUSE	Fdft1	Squalene synthase		0.546782	0.211859	10	10	10	32.6	32.6	32.6	52.084	0	45.702	124660000	24	NaN	24.6008	24.2369	23.8426	24.2805	24.27	NaN	23.8525	24.0155	NaN	23.9543		A0A571BEK9	A0A571BEK9_MOUSE	Fdft1	Squalene synthase
P53810	PIPNA_MOUSE	Pitpna	Phosphatidylinositol transfer protein alpha isoform		0.195391	0.0491545	20	20	18	72	72	68.6	31.893	0	323.31	4404900000	430	25.7744	25.9147	25.9296	25.7729	25.4918	25.7747	25.7624	25.611	26.0717	25.9363	25.8052		P53810	PIPNA_MOUSE	Pitpna	Phosphatidylinositol transfer protein alpha isoform
P53986	MOT1_MOUSE	Slc16a1	Monocarboxylate transporter 1		2.20583	-0.547851	5	5	5	14	14	14	53.267	0	128.32	542100000	66	24.9441	24.1217	24.1564	24.4723	24.9678	24.0138	24.5487	25.16	24.7532	24.4009	24.6366		P53986	MOT1_MOUSE	Slc16a1	Monocarboxylate transporter 1
P53994	RAB2A_MOUSE	Rab2a	Ras-related protein Rab-2A		0.929519	-0.141931	18	18	17	78.8	78.8	78.8	23.547	0	323.31	7104800000	761	26.6938	26.7331	26.6562	26.6642	26.8873	26.7852	26.4973	26.7204	26.7955	27.0798	26.6782		P53994	RAB2A_MOUSE	Rab2a	Ras-related protein Rab-2A
P53995	APC1_MOUSE	Anapc1	Anaphase-promoting complex subunit 1		0	NaN	4	4	4	2.2	2.2	2.2	215.99	0.0014702	4.7733	22497000	16	NaN	NaN	NaN	NaN	20.7992	NaN	NaN	20.988	22.5887	NaN	NaN		P53995	APC1_MOUSE	Anapc1	Anaphase-promoting complex subunit 1
P53996	CNBP_MOUSE	Cnbp	Cellular nucleic acid-binding protein		0.0455956	-0.0128276	4	4	2	32	32	16.9	19.592	0	147.97	1476900000	133	25.6826	25.572	25.7136	25.7105	25.3242	25.5336	25.5561	25.5306	25.9554	25.6334	25.6538		P53996	CNBP_MOUSE	Cnbp	Cellular nucleic acid-binding protein
P54071	IDHP_MOUSE	Idh2	Isocitrate dehydrogenase [NADP], mitochondrial		0.363371	0.067286	29	29	28	54.2	54.2	54.2	50.906	0	323.31	10886000000	810	28.0204	28.0331	28.1811	28.2423	28.0377	28.3887	28.0956	28.3296	28.1877	28.1748	27.9749		P54071	IDHP_MOUSE	Idh2	Isocitrate dehydrogenase [NADP], mitochondrial
P54103	DNJC2_MOUSE	Dnajc2	DnaJ homolog subfamily C member 2		0.270302	0.0647463	16	16	16	34.6	34.6	34.6	71.721	0	86.988	359120000	70	23.6663	23.6132	23.804	23.5365	23.8897	23.8009	23.859	23.73	23.7828	23.4125	23.4666		P54103	DNJC2_MOUSE	Dnajc2	DnaJ homolog subfamily C member 2
P54116	STOM_MOUSE	Stom	Stomatin		1.89555	0.437359	8	8	8	34.5	34.5	34.5	31.375	0	95.454	432280000	101	23.8125	24.5605	24.2969	24.5177	23.953	24.363	24.694	23.825	23.9534	24.2162	24.5342		P54116	STOM_MOUSE	Stom	Stomatin
D3Z1Z8	D3Z1Z8_MOUSE	Stmn1	Stathmin (Fragment)		0.204185	-0.0707976	4	4	3	42.2	42.2	33.3	11.729	0.00053879	7.0434	339810000	45	24.2971	24.1002	24.2556	24.4849	24.1123	24.1725	24.52	24.2409	24.2081	24.7444	24.6619		D3Z1Z8	D3Z1Z8_MOUSE	Stmn1	Stathmin (Fragment)
E9Q4M2	E9Q4M2_MOUSE	Lipe	Hormone-sensitive lipase		0.471948	-0.0704276	40	40	40	49.5	49.5	49.5	117.28	0	323.31	4412000000	632	27.7683	27.819	27.7813	27.7674	27.9193	27.7725	27.773	27.6026	27.8875	27.8874	28.0534		E9Q4M2	E9Q4M2_MOUSE	Lipe	Hormone-sensitive lipase
Q3TN85	Q3TN85_MOUSE	Rad23a	UV excision repair protein RAD23 homolog A (Fragment)		0.299749	0.100019	6	4	4	22.7	17.1	17.1	34.834	0	38.301	280080000	43	23.2161	23.7254	23.3268	23.1588	23.4268	23.1632	23.0837	22.7944	23.3098	23.257	23.1454		Q3TN85	Q3TN85_MOUSE	Rad23a	UV excision repair protein RAD23 homolog A (Fragment)
P54728	RD23B_MOUSE	Rad23b	UV excision repair protein RAD23 homolog B		0.900096	0.192058	10	10	8	24	24	24	43.512	0	239.25	1744600000	157	25.6478	25.5972	25.6371	25.3736	25.2106	25.4287	25.459	25.1245	25.4526	25.0222	25.3848		P54728	RD23B_MOUSE	Rad23b	UV excision repair protein RAD23 homolog B
P54729	NUB1_MOUSE	Nub1	NEDD8 ultimate buster 1		0.456526	0.155532	11	11	11	22.1	22.1	22.1	70.306	0	61.687	236760000	83	23.6159	23.8696	23.7671	23.6502	23.2429	23.5497	24.2147	23.8784	23.4611	23.8523	23.8776		P54729	NUB1_MOUSE	Nub1	NEDD8 ultimate buster 1
P54731	FAF1_MOUSE	Faf1	FAS-associated factor 1		0.71989	-0.157394	11	11	11	22.5	22.5	22.5	73.862	0	47.768	257120000	63	23.7164	23.725	23.8363	23.3799	23.714	23.8597	23.8563	23.9208	24.0453	24.1069	23.8298		P54731	FAF1_MOUSE	Faf1	FAS-associated factor 1
P54751	SIA4A_MOUSE	St3gal1	CMP-N-acetylneuraminate-beta-galactosamide-alpha-2,3-sialyltransferase 1		0.916944	-0.137862	8	8	8	27	27	27	39.072	0	26.48	461820000	91	23.5849	23.5194	23.7588	23.8176	23.859	23.4839	23.5693	23.85	23.8365	23.8246	23.651		P54751	SIA4A_MOUSE	St3gal1	CMP-N-acetylneuraminate-beta-galactosamide-alpha-2,3-sialyltransferase 1
P54775	PRS6B_MOUSE	Psmc4	26S proteasome regulatory subunit 6B		0.839367	0.107203	30	30	30	78	78	78	47.408	0	179.11	3885400000	720	26.5353	26.7204	26.6299	26.6046	26.563	26.7605	26.573	26.3684	26.7576	26.605	26.4735		P54775	PRS6B_MOUSE	Psmc4	26S proteasome regulatory subunit 6B
P54822	PUR8_MOUSE	Adsl	Adenylosuccinate lyase		0.291707	0.0663895	30	30	30	68.8	68.8	68.8	54.866	0	323.31	3867200000	588	26.5885	26.9845	26.7677	26.8924	26.9851	26.6576	26.7283	26.899	26.5164	26.7648	26.6845		P54822	PUR8_MOUSE	Adsl	Adenylosuccinate lyase
P54823	DDX6_MOUSE	Ddx6	Probable ATP-dependent RNA helicase DDX6		0.540416	0.108594	25	25	25	75.2	75.2	75.2	54.191	0	323.31	2176600000	317	26.0777	26.0079	25.9993	25.8581	25.6007	25.9997	26.0409	25.7837	26.1439	25.7771	25.8524		P54823	DDX6_MOUSE	Ddx6	Probable ATP-dependent RNA helicase DDX6
P54923	ADPRH_MOUSE	Adprh	[Protein ADP-ribosylarginine] hydrolase		0	-0.0205402	8	8	8	35.6	35.6	35.6	40.068	0	21.039	109010000	29	NaN	NaN	NaN	23.4302	23.3907	NaN	NaN	NaN	23.3291	23.4634	23.6197		P54923	ADPRH_MOUSE	Adprh	[Protein ADP-ribosylarginine] hydrolase
P55002	MFAP2_MOUSE	Mfap2	Microfibrillar-associated protein 2		0	NaN	2	2	2	10.4	10.4	10.4	20.578	0.0080804	3.0462	245880000	24	NaN	24.3144	24.2711	23.9859	NaN	23.9576	24.2208	NaN	NaN	NaN	NaN		P55002	MFAP2_MOUSE	Mfap2	Microfibrillar-associated protein 2
P55096	ABCD3_MOUSE	Abcd3	ATP-binding cassette sub-family D member 3		0.280707	-0.0466139	22	22	22	38.8	38.8	38.8	75.474	0	131.02	1195100000	231	26.0268	25.9891	26.1314	26.271	26.3783	26.2725	26.1156	26.2155	26.185	26.2379	26.1717		P55096	ABCD3_MOUSE	Abcd3	ATP-binding cassette sub-family D member 3
P55258	RAB8A_MOUSE	Rab8a	Ras-related protein Rab-8A		1.09963	-0.389918	9	6	3	40.6	30.9	16.4	23.668	0	47.116	480290000	93	25.3981	24.9041	24.9536	24.4799	25.0634	24.3144	25.342	25.2984	25.4445	24.8046	25.1234		P55258	RAB8A_MOUSE	Rab8a	Ras-related protein Rab-8A
P55264	ADK_MOUSE	Adk	Adenosine kinase		0.00955031	0.00238361	22	22	22	49.9	49.9	49.9	40.148	0	268.74	5816800000	483	26.747	26.8546	26.6019	26.6824	26.6875	26.8182	26.8436	26.7566	27.0384	26.7672	26.5498		P55264	ADK_MOUSE	Adk	Adenosine kinase
P55284	CADH5_MOUSE	Cdh5	Cadherin-5		0	NaN	3	3	3	4.7	4.7	4.7	87.902	0	27.029	26407000	11	NaN	NaN	NaN	NaN	21.7091	NaN	NaN	NaN	22.0742	NaN	NaN		P55284	CADH5_MOUSE	Cdh5	Cadherin-5
P55302	AMRP_MOUSE	Lrpap1	Alpha-2-macroglobulin receptor-associated protein		0.0591327	-0.00943127	13	13	13	38.6	38.6	38.6	42.215	0	213.62	4304300000	370	27.99	27.8635	28.1664	28.122	28.014	28.1234	28.0137	28.1677	28.0734	28.0549	28.1034		P55302	AMRP_MOUSE	Lrpap1	Alpha-2-macroglobulin receptor-associated protein
P55772	ENTP1_MOUSE	Entpd1	Ectonucleoside triphosphate diphosphohydrolase 1		0.361069	0.221102	4	4	4	10.6	10.6	10.6	57.205	0.00052342	6.3137	75207000	24	NaN	NaN	NaN	NaN	23.3835	23.6445	24.0975	23.4442	23.7847	23.9872	NaN		P55772	ENTP1_MOUSE	Entpd1	Ectonucleoside triphosphate diphosphohydrolase 1
A0A0R4J1H6	A0A0R4J1H6_MOUSE	Golga3	Golgin subfamily A member 3		0.125155	-0.0229485	28	28	28	24.4	24.4	24.4	162.89	0	216.78	819060000	206	22.9381	22.7986	22.9482	22.9183	22.8038	23.0339	22.8097	23.0065	23.1108	22.7691	22.9199		A0A0R4J1H6	A0A0R4J1H6_MOUSE	Golga3	Golgin subfamily A member 3
P56135	ATPK_MOUSE	Atp5mf	ATP synthase subunit f, mitochondrial		0.391112	0.131466	6	6	6	47.7	47.7	47.7	10.344	0	72.202	6755100000	301	28.3964	28.3833	28.8188	28.4518	28.3752	29.1784	28.6323	28.7022	28.4546	28.7768	28.6633		P56135	ATPK_MOUSE	Atp5mf	ATP synthase subunit f, mitochondrial
P56183	RRP1_MOUSE	Rrp1	Ribosomal RNA processing protein 1 homolog A		0	NaN	4	4	4	9.9	9.9	9.9	54.776	0.0016835	4.389	51975000	15	NaN	NaN	NaN	NaN	NaN	NaN	NaN	NaN	NaN	22.5807	22.1927		P56183	RRP1_MOUSE	Rrp1	Ribosomal RNA processing protein 1 homolog A
P56212	ARP19_MOUSE	Arpp19	cAMP-regulated phosphoprotein 19		0.556619	-0.131934	4	4	3	51.8	51.8	42	12.293	0	17.173	651750000	81	24.0864	24.2723	24.0956	23.9559	24.3893	24.0818	24.3855	24.2922	24.6237	24.2621	24.0872		P56212	ARP19_MOUSE	Arpp19	cAMP-regulated phosphoprotein 19
P56213	ALR_MOUSE	Gfer	FAD-linked sulfhydryl oxidase ALR		0.813222	0.178102	9	9	9	66.7	66.7	66.7	22.876	0	43.8	1629800000	141	26.0746	26.0909	26.2625	26.1807	26.0312	26.4529	26.1322	26.2824	25.7461	26.2833	25.8567		P56213	ALR_MOUSE	Gfer	FAD-linked sulfhydryl oxidase ALR
P56371	RAB4A_MOUSE	Rab4a	Ras-related protein Rab-4A		0.157029	0.0498466	11	11	8	60.1	60.1	47.2	24.408	0	29.773	259290000	85	24.545	24.4712	24.5104	24.3291	24.2976	24.7161	24.0858	24.5255	24.0811	24.4746	24.3123		P56371	RAB4A_MOUSE	Rab4a	Ras-related protein Rab-4A
P56375	ACYP2_MOUSE	Acyp2	Acylphosphatase-2		0.311003	0.147879	3	3	3	36.8	36.8	36.8	11.877	0	83.53	154470000	44	22.0956	22.7222	22.5274	22.2545	21.7077	22.2186	22.0569	22.3675	21.9145	22.7985	22.3643		P56375	ACYP2_MOUSE	Acyp2	Acylphosphatase-2
P56376	ACYP1_MOUSE	Acyp1	Acylphosphatase-1		1.07545	-0.342575	7	7	7	72.7	72.7	72.7	11.241	0	16.107	307080000	76	24.2402	24.1276	24.4472	23.6149	24.6825	24.128	24.5634	24.4584	24.3615	24.8128	24.5576		P56376	ACYP1_MOUSE	Acyp1	Acylphosphatase-1
A0A1Y7VLP0	A0A1Y7VLP0_MOUSE	Atp5mpl	ATP synthase subunit ATP5MPL, mitochondrial (Fragment)		0.157025	0.125335	1	1	1	14	14	14	6.5608	0.0078775	3.0722	458560000	107	26.6747	26.1792	26.7208	25.4607	26.4395	27.2154	26.6348	26.2906	25.6913	26.6064	26.1985		A0A1Y7VLP0	A0A1Y7VLP0_MOUSE	Atp5mpl	ATP synthase subunit ATP5MPL, mitochondrial (Fragment)
P56380	AP4A_MOUSE	Nudt2	Bis(5-nucleosyl)-tetraphosphatase [asymmetrical]		0.342506	-0.0939578	9	9	9	69.4	69.4	69.4	16.989	0	43.391	861710000	161	25.585	25.4153	25.6366	25.6895	25.6159	25.3472	25.0796	25.6196	25.674	25.3368	25.3342		P56380	AP4A_MOUSE	Nudt2	Bis(5-nucleosyl)-tetraphosphatase [asymmetrical]
P56382	ATP5E_MOUSE	Atp5f1e	ATP synthase subunit epsilon, mitochondrial		0.1642	0.138846	3	3	3	44.2	44.2	44.2	5.8378	0.0049989	3.5411	692480000	36	24.992	24.9457	NaN	25.5952	25.4139	26.2429	NaN	25.8032	25.3769	25.9597	25.189		P56382	ATP5E_MOUSE	Atp5f1e	ATP synthase subunit epsilon, mitochondrial
P56389	CDD_MOUSE	Cda	Cytidine deaminase		0.0134849	0.00501391	7	7	7	79.5	79.5	79.5	16.131	0	86.281	1055800000	125	25.3553	25.6348	25.5216	25.4744	25.759	25.521	25.1952	25.4348	25.5208	25.0718	25.6447		P56389	CDD_MOUSE	Cda	Cytidine deaminase
P56391	CX6B1_MOUSE	Cox6b1	Cytochrome c oxidase subunit 6B1		0.930259	0.157623	10	10	10	75.6	75.6	75.6	10.071	0	323.31	17269000000	759	29.352	29.1267	29.5618	29.3567	29.2146	29.64	29.3937	29.3985	29.1797	29.2288	29.1754		P56391	CX6B1_MOUSE	Cox6b1	Cytochrome c oxidase subunit 6B1
P56394	COX17_MOUSE	Cox17	Cytochrome c oxidase copper chaperone		0.0853801	-0.0314907	2	2	2	57.1	57.1	57.1	6.784	0	26.507	236940000	33	22.7653	23.0689	22.7975	22.9851	22.6394	22.6315	22.9448	22.8237	23.1879	23.169	NaN		P56394	COX17_MOUSE	Cox17	Cytochrome c oxidase copper chaperone
P56395	CYB5_MOUSE	Cyb5a	Cytochrome b5		0.416517	-0.059005	6	6	4	47.8	47.8	38.8	15.241	0	323.31	8331400000	342	28.0433	28.0519	27.9079	27.9068	27.9792	27.9528	28.0708	28.0085	27.8605	28.2314	28.0993		P56395	CYB5_MOUSE	Cyb5a	Cytochrome b5
Q3U4W8	Q3U4W8_MOUSE	Usp5	Ubiquitin carboxyl-terminal hydrolase		0.67633	0.0603385	41	41	41	57.4	57.4	57.4	93.354	0	323.31	4582900000	626	25.695	25.7359	25.7709	25.7468	25.6851	25.6222	25.6744	25.5763	25.6589	25.5283	25.7546		Q3U4W8	Q3U4W8_MOUSE	Usp5	Ubiquitin carboxyl-terminal hydrolase
P56480	ATPB_MOUSE	Atp5f1b	ATP synthase subunit beta, mitochondrial		0.0105482	0.0018762	43	43	43	83.2	83.2	83.2	56.3	0	323.31	144850000000	6910	31.5897	31.5033	31.6517	31.5444	31.6196	31.4721	31.428	31.6123	31.3402	31.4471	31.4992		P56480	ATPB_MOUSE	Atp5f1b	ATP synthase subunit beta, mitochondrial
P56501	UCP3_MOUSE	Ucp3	Mitochondrial uncoupling protein 3		0.206284	-0.116516	5	5	5	23.1	23.1	23.1	33.91	0	13.733	159460000	29	23.9242	24.0247	24.3629	24.2303	24.6492	24.3765	NaN	24.4546	NaN	23.9358	24.8616		P56501	UCP3_MOUSE	Ucp3	Mitochondrial uncoupling protein 3
P56542	DNS2A_MOUSE	Dnase2	Deoxyribonuclease-2-alpha		0	-0.0985743	2	2	2	7.9	7.9	7.9	38.81	0.00078084	6.1315	44399000	14	NaN	NaN	NaN	NaN	23.56	NaN	22.9992	NaN	NaN	22.6225	23.1108		P56542	DNS2A_MOUSE	Dnase2	Deoxyribonuclease-2-alpha
E9Q0T4	E9Q0T4_MOUSE	Ctbp2	C-terminal-binding protein 2 (Fragment)		0	NaN	5	2	2	32.4	17	17	19.578	0	13.871	113180000	31	22.5965	NaN	NaN	NaN	NaN	NaN	NaN	NaN	23.8397	22.5469	22.2952		E9Q0T4	E9Q0T4_MOUSE	Ctbp2	C-terminal-binding protein 2 (Fragment)
P56677	ST14_MOUSE	St14	Suppressor of tumorigenicity 14 protein homolog		0.662691	0.261061	17	17	17	29.8	29.8	29.8	94.654	0	78.813	1122800000	209	25.6459	25.5902	25.7161	25.5469	25.298	26.2711	25.775	25.2092	26.0808	25.6906	25.1883		P56677	ST14_MOUSE	St14	Suppressor of tumorigenicity 14 protein homolog
P56695	WFS1_MOUSE	Wfs1	Wolframin		0.162323	0.0650513	13	13	13	17.3	17.3	17.3	100.58	0	23.496	247640000	92	23.213	23.3005	23.2483	22.972	23.6605	23.4052	23.2205	23.3452	23.0456	22.9648	22.7563		P56695	WFS1_MOUSE	Wfs1	Wolframin
P56812	PDCD5_MOUSE	Pdcd5	Programmed cell death protein 5		0.207456	-0.050054	6	6	6	45.2	45.2	45.2	14.275	0	58.304	828190000	132	24.7308	24.7934	24.5811	24.8537	24.6552	24.473	24.5092	24.893	24.8206	24.5532	24.5		P56812	PDCD5_MOUSE	Pdcd5	Programmed cell death protein 5
P56873	ZNRD2_MOUSE	Znrd2	Protein ZNRD2		0.281579	0.163601	4	4	4	38.2	38.2	38.2	21.336	0	47.793	126900000	21	22.32	22.3213	22.246	NaN	21.5417	22.7176	22.3399	NaN	22.7393	22.4378	22.1741		P56873	ZNRD2_MOUSE	Znrd2	Protein ZNRD2
G3UXT7	G3UXT7_MOUSE	Fus	RNA-binding protein FUS (Fragment)		0.198467	-0.0323362	9	9	7	67.7	67.7	60.8	13.897	0	124.09	1722100000	133	25.3433	25.3176	25.3021	25.3556	25.3154	25.4395	25.5806	25.3862	25.5644	25.4393	25.5396		G3UXT7	G3UXT7_MOUSE	Fus	RNA-binding protein FUS (Fragment)
P57016	LAD1_MOUSE	Lad1	Ladinin-1		1.80362	0.353817	8	8	8	21.4	21.4	21.4	58.863	0	12.183	89912000	37	22.2189	22.6017	NaN	22.5051	21.7681	22.5047	22.1799	22.0798	22.0564	22.2324	22.2086		P57016	LAD1_MOUSE	Lad1	Ladinin-1
P57080	UBP25_MOUSE	Usp25	Ubiquitin carboxyl-terminal hydrolase 25		0	NaN	3	3	3	3.6	3.6	3.6	121.42	0.0037559	3.9982	10512000	5	NaN	NaN	NaN	NaN	NaN	NaN	NaN	NaN	NaN	NaN	NaN		P57080	UBP25_MOUSE	Usp25	Ubiquitin carboxyl-terminal hydrolase 25
P57716	NICA_MOUSE	Ncstn	Nicastrin		0.276649	-0.171009	4	4	4	5.9	5.9	5.9	78.491	0.00052493	6.4274	116990000	39	24.4056	23.9345	23.7842	23.5092	23.631	24.0739	24.1401	23.3462	24.8342	24.1256	24.0136		P57716	NICA_MOUSE	Ncstn	Nicastrin
P57746	VATD_MOUSE	Atp6v1d	V-type proton ATPase subunit D		0.557292	0.0555937	12	12	12	45.3	45.3	45.3	28.369	0	174.7	2017300000	228	25.9876	26.0272	26.1041	26.0528	25.8926	26.0036	26.0176	26.0484	25.866	26.1389	25.9793		P57746	VATD_MOUSE	Atp6v1d	V-type proton ATPase subunit D
P57759	ERP29_MOUSE	Erp29	Endoplasmic reticulum resident protein 29		0.225528	0.0384196	16	16	16	52.3	52.3	52.3	28.823	0	301.64	4085800000	404	27.3988	27.3248	27.563	27.4618	27.4395	27.381	27.1704	27.3393	27.2175	27.2863	27.3693		P57759	ERP29_MOUSE	Erp29	Endoplasmic reticulum resident protein 29
P57780	ACTN4_MOUSE	Actn4	Alpha-actinin-4		0.00847474	0.00137049	77	77	27	79.5	79.5	32.5	104.98	0	323.31	54859000000	4512	29.6412	29.7039	29.5158	29.5704	29.4212	29.6516	29.6093	29.5782	29.6533	29.7251	29.6341		P57780	ACTN4_MOUSE	Actn4	Alpha-actinin-4
P57784	RU2A_MOUSE	Snrpa1	U2 small nuclear ribonucleoprotein A		0.104677	-0.0572695	11	11	11	39.2	39.2	39.2	28.357	0	43.531	269230000	86	23.4961	23.3819	23.0708	23.2557	23.1188	23.9124	23.684	23.7468	23.7985	23.8475	23.1016		P57784	RU2A_MOUSE	Snrpa1	U2 small nuclear ribonucleoprotein A
P58021	TM9S2_MOUSE	Tm9sf2	Transmembrane 9 superfamily member 2		1.68508	-0.226553	16	16	16	26.7	26.7	26.7	75.329	0	323.31	7419200000	729	26.4227	26.4376	26.3715	26.2237	26.5316	26.1827	26.3129	26.5592	26.79	26.5508	26.3391		P58021	TM9S2_MOUSE	Tm9sf2	Transmembrane 9 superfamily member 2
P58044	IDI1_MOUSE	Idi1	Isopentenyl-diphosphate Delta-isomerase 1		0.248825	0.0545001	16	16	16	70.9	70.9	70.9	26.289	0	168.78	2040300000	308	25.7814	26.0191	25.9119	25.8443	25.7966	25.8755	25.8359	25.7382	26.1302	26.0038	25.6068		P58044	IDI1_MOUSE	Idi1	Isopentenyl-diphosphate Delta-isomerase 1
P58058	NADK_MOUSE	Nadk	NAD kinase		0	NaN	5	5	5	16.6	16.6	16.6	48.597	0.0015283	5.5583	72758000	28	NaN	NaN	NaN	NaN	NaN	NaN	NaN	NaN	NaN	NaN	NaN		P58058	NADK_MOUSE	Nadk	NAD kinase
D3YVZ9	D3YVZ9_MOUSE	Mrps21	28S ribosomal protein S21, mitochondrial (Fragment)		0	NaN	2	2	2	61.4	61.4	61.4	5.1089	0	19.755	52853000	12	NaN	NaN	NaN	NaN	NaN	NaN	NaN	NaN	NaN	NaN	NaN		D3YVZ9	D3YVZ9_MOUSE	Mrps21	28S ribosomal protein S21, mitochondrial (Fragment)
P58064	RT06_MOUSE	Mrps6	28S ribosomal protein S6, mitochondrial		0.126717	0.0650314	4	4	4	44.8	44.8	44.8	14.308	0	13.526	68869000	30	NaN	22.6954	22.7138	23.0359	22.7299	22.4823	22.4301	NaN	NaN	22.483	NaN		P58064	RT06_MOUSE	Mrps6	28S ribosomal protein S6, mitochondrial
P58137	ACOT8_MOUSE	Acot8	Acyl-coenzyme A thioesterase 8		2.7896	0.418249	8	8	8	34.1	34.1	34.1	35.827	0	15.575	200200000	37	22.4519	22.9731	23.0247	23.1259	22.7326	23.2155	NaN	22.6524	22.5255	22.7795	22.8575		P58137	ACOT8_MOUSE	Acot8	Acyl-coenzyme A thioesterase 8
P58158	B3GA3_MOUSE	B3gat3	Galactosylgalactosylxylosylprotein 3-beta-glucuronosyltransferase 3		0	NaN	2	2	2	7.2	7.2	7.2	37.066	0.0015225	5.47	6981200	12	NaN	NaN	NaN	NaN	NaN	NaN	NaN	NaN	NaN	NaN	NaN		P58158	B3GA3_MOUSE	B3gat3	Galactosylgalactosylxylosylprotein 3-beta-glucuronosyltransferase 3
P58252	EF2_MOUSE	Eef2	Elongation factor 2		0.0562743	0.0105438	80	80	78	75.5	75.5	74.4	95.313	0	323.31	251390000000	11293	31.5784	31.6716	31.6121	31.4564	31.4271	31.4223	31.2987	31.5449	31.4392	31.4486	31.4518		P58252	EF2_MOUSE	Eef2	Elongation factor 2
P58281	OPA1_MOUSE	Opa1	Dynamin-like 120 kDa protein, mitochondrial		1.19867	-0.123563	33	33	33	37.5	37.5	37.5	111.34	0	87.799	1499700000	252	24.3594	24.337	24.2529	24.3783	24.3691	24.3408	24.3217	24.5582	24.571	24.5473	24.2932		P58281	OPA1_MOUSE	Opa1	Dynamin-like 120 kDa protein, mitochondrial
P58389	PTPA_MOUSE	Ptpa	Serine/threonine-protein phosphatase 2A activator		0.0376755	-0.0144512	11	11	11	52	52	52	36.71	0	97.463	657780000	139	25.7714	25.6725	25.5297	25.4978	25.7634	25.3762	25.7968	25.2519	25.4178	25.4191	25.9107		P58389	PTPA_MOUSE	Ptpa	Serine/threonine-protein phosphatase 2A activator
P58404	STRN4_MOUSE	Strn4	Striatin-4		0.220901	-0.105108	8	4	4	11.6	8.8	8.8	81.644	0	13.311	85735000	17	23.0565	23.4716	NaN	23.2452	23.032	NaN	23.2411	23.4575	23.5823	23.662	23.7562		P58404	STRN4_MOUSE	Strn4	Striatin-4
P58466	CTDS1_MOUSE	Ctdsp1	Carboxy-terminal domain RNA polymerase II polypeptide A small phosphatase 1		0	NaN	2	2	2	10	10	10	29.266	0.0088725	2.9155	13656000	4	NaN	NaN	NaN	NaN	NaN	NaN	NaN	NaN	NaN	NaN	NaN		P58466	CTDS1_MOUSE	Ctdsp1	Carboxy-terminal domain RNA polymerase II polypeptide A small phosphatase 1
P58686	CI016_MOUSE	3 SV=1	UPF0184 protein C9orf16 homolog		0	NaN	1	1	1	10.8	10.8	10.8	9.0547	0.00724	3.1228	60346000	8	NaN	NaN	NaN	NaN	NaN	NaN	NaN	NaN	NaN	NaN	NaN		P58686	CI016_MOUSE	3 SV=1	UPF0184 protein C9orf16 homolog
P58742	AAAS_MOUSE	Aaas	Aladin		0	0.294775	4	4	4	9.7	9.7	9.7	59.43	0.0035261	4.0159	375880000	9	NaN	NaN	NaN	NaN	NaN	22.6644	NaN	NaN	NaN	NaN	22.3696		P58742	AAAS_MOUSE	Aaas	Aladin
P58802	TB10A_MOUSE	Tbc1d10a	TBC1 domain family member 10A		0	NaN	1	1	1	3.4	3.4	3.4	56.202	0.0016941	4.5119	23289000	8	NaN	NaN	NaN	NaN	NaN	NaN	NaN	NaN	NaN	NaN	NaN		P58802	TB10A_MOUSE	Tbc1d10a	TBC1 domain family member 10A
P58854	GCP3_MOUSE	Tubgcp3	Gamma-tubulin complex component 3		0	NaN	2	2	2	2.1	2.1	2.1	103.47	0.0098712	2.814	77199000	10	NaN	NaN	NaN	NaN	NaN	NaN	NaN	NaN	NaN	NaN	NaN		P58854	GCP3_MOUSE	Tubgcp3	Gamma-tubulin complex component 3
P58871	TB182_MOUSE	Tnks1bp1	182 kDa tankyrase-1-binding protein		0.167669	0.0398621	29	29	29	27.1	27.1	27.1	181.82	0	172.79	451650000	136	23.3652	23.3737	23.1521	23.2638	23.0696	23.1113	22.9151	22.9684	23.0893	23.0568	23.1908		P58871	TB182_MOUSE	Tnks1bp1	182 kDa tankyrase-1-binding protein
P59016	VP33B_MOUSE	Vps33b	Vacuolar protein sorting-associated protein 33B		0.0638562	0.0291184	11	11	11	24.6	24.6	24.6	70.525	0	44.447	182700000	47	24.2271	24.0584	NaN	24.3872	24.3425	24.072	24.2575	23.6338	24.0215	24.4454	24.3176		P59016	VP33B_MOUSE	Vps33b	Vacuolar protein sorting-associated protein 33B
P59017	B2L13_MOUSE	Bcl2l13	Bcl-2-like protein 13		0.145959	0.0375491	12	12	12	41.2	41.2	41.2	46.719	0	209.51	259590000	81	23.2588	23.1635	23.3848	23.2772	23.2611	23.5739	23.1084	23.4338	23.4167	23.0668	23.147		P59017	B2L13_MOUSE	Bcl2l13	Bcl-2-like protein 13
P59266	FITM2_MOUSE	Fitm2	Fat storage-inducing transmembrane protein 2		0.0251458	-0.0105404	4	4	4	16	16	16	30.016	0	18.725	170070000	55	23.5707	23.9882	23.6235	23.7491	24.3111	23.6551	23.7984	23.8551	23.7114	23.4712	23.721		P59266	FITM2_MOUSE	Fitm2	Fat storage-inducing transmembrane protein 2
P59325	IF5_MOUSE	Eif5	Eukaryotic translation initiation factor 5		1.14056	0.103237	24	24	24	52	52	52	48.968	0	176.77	7998800000	792	27.6885	28.0291	28.0255	27.9047	27.911	27.8572	27.863	27.8904	27.821	27.8016	27.8836		P59325	IF5_MOUSE	Eif5	Eukaryotic translation initiation factor 5
P59481	LMA2L_MOUSE	Lman2l	VIP36-like protein		0	NaN	4	4	4	17.6	17.6	17.6	39.881	0.0087203	3.0028	42999000	3	NaN	NaN	NaN	NaN	NaN	NaN	NaN	NaN	NaN	NaN	NaN		P59481	LMA2L_MOUSE	Lman2l	VIP36-like protein
A0A3B2WAQ7	A0A3B2WAQ7_MOUSE	Anks1	Ankyrin repeat and SAM domain containing 1		0.242593	-0.411436	5	5	5	5.8	5.8	5.8	122.78	0.0015125	5.352	100020000	18	NaN	23.6734	NaN	24.9974	25.3814	25.0315	NaN	NaN	NaN	NaN	24.5763		A0A3B2WAQ7	A0A3B2WAQ7_MOUSE	Anks1	Ankyrin repeat and SAM domain containing 1
P59708	SF3B6_MOUSE	Sf3b6	Splicing factor 3B subunit 6		1.3882	0.394046	4	4	4	39.2	39.2	39.2	14.585	0.00030266	11.081	53356000	47	20.6587	21.531	NaN	21.3354	NaN	21.4405	21.1726	NaN	20.9972	21.298	20.9495		P59708	SF3B6_MOUSE	Sf3b6	Splicing factor 3B subunit 6
P59999	ARPC4_MOUSE	Arpc4	Actin-related protein 2/3 complex subunit 4		0.458857	-0.05127	14	14	14	82.1	82.1	82.1	19.667	0	109.44	6208400000	432	27.6674	27.5703	27.6542	27.5587	27.4998	27.5257	27.4956	27.5813	27.5443	27.7851	27.5955		P59999	ARPC4_MOUSE	Arpc4	Actin-related protein 2/3 complex subunit 4
P60060	SC61G_MOUSE	Sec61g	Protein transport protein Sec61 subunit gamma		0.630729	-0.496657	2	2	2	36.8	36.8	36.8	7.7412	0	193.63	796870000	93	26.0431	26.127	24.3015	25.894	26.2394	NaN	25.8174	25.9581	NaN	25.7114	26.2061		P60060	SC61G_MOUSE	Sec61g	Protein transport protein Sec61 subunit gamma
P60122	RUVB1_MOUSE	Ruvbl1	RuvB-like 1		0.0220258	-0.00990855	9	9	9	27.4	27.4	27.4	50.213	0	45.175	346810000	98	23.3745	23.3484	22.9477	23.4057	23.1121	23.4223	23.5317	23.0987	23.8655	23.2902	23.3054		P60122	RUVB1_MOUSE	Ruvbl1	RuvB-like 1
P60229	EIF3E_MOUSE	Eif3e	Eukaryotic translation initiation factor 3 subunit E		0.0373935	-0.00588938	32	32	32	68.8	68.8	68.8	52.22	0	323.31	9203400000	929	27.9792	28.0424	28.1709	28.0287	28.1222	27.8708	28.0546	28.1446	27.9601	28.0079	28.0223		P60229	EIF3E_MOUSE	Eif3e	Eukaryotic translation initiation factor 3 subunit E
P60335	PCBP1_MOUSE	Pcbp1	Poly(rC)-binding protein 1		0.163292	-0.0258594	18	18	13	81.7	81.7	69.1	37.497	0	323.31	12747000000	864	29.2739	29.3404	29.1149	29.2625	29.2085	29.0513	29.26	29.1278	29.2064	29.1911	29.3823		P60335	PCBP1_MOUSE	Pcbp1	Poly(rC)-binding protein 1
P60521	GBRL2_MOUSE	Gabarapl2	Gamma-aminobutyric acid receptor-associated protein-like 2		0.0295403	0.0110146	8	8	7	47.9	47.9	47.9	13.667	0.00030722	11.803	379480000	63	23.1952	23.0503	23.3123	23.1721	22.8102	23.4625	22.8855	23.2646	23.1007	23.4321	23.1904		P60521	GBRL2_MOUSE	Gabarapl2	Gamma-aminobutyric acid receptor-associated protein-like 2
P60603	ROMO1_MOUSE	Romo1	Reactive oxygen species modulator 1		0	NaN	1	1	1	21.5	21.5	21.5	8.1828	0.0026134	4.218	2252100	2	NaN	NaN	NaN	NaN	NaN	NaN	NaN	NaN	NaN	NaN	NaN		P60603	ROMO1_MOUSE	Romo1	Reactive oxygen species modulator 1
P60670	NPL4_MOUSE	Nploc4	Nuclear protein localization protein 4 homolog		0.244848	0.0267637	25	25	25	57.9	57.9	57.9	68.016	0	184.09	1443700000	296	24.5127	24.4666	24.4864	24.4434	24.3795	24.4274	24.6146	24.4299	24.455	24.5827	24.4057		P60670	NPL4_MOUSE	Nploc4	Nuclear protein localization protein 4 homolog
P60710	ACTB_MOUSE	Actb	Actin, cytoplasmic 1		0.44297	-0.374403	50	1	1	99.2	4.5	4.5	41.736	0	323.31	2301600000	466	26.7275	27.0294	25.1756	26.7509	27.6206	26.4742	26.8521	26.3498	27.3377	26.2301	26.7193		P60710	ACTB_MOUSE	Actb	Actin, cytoplasmic 1
P60766	CDC42_MOUSE	Cdc42	Cell division control protein 42 homolog		0.00368443	-0.00152486	10	9	9	59.7	53.9	53.9	21.258	0	210.93	7007300000	701	27.8544	27.4286	27.4223	27.3686	27.2352	27.4791	27.8149	27.5914	27.6543	27.1477	27.5423		P60766	CDC42_MOUSE	Cdc42	Cell division control protein 42 homolog
P60843	IF4A1_MOUSE	Eif4a1	Eukaryotic initiation factor 4A-I		0.462448	0.0574546	40	40	26	74.4	74.4	51.5	46.153	0	323.31	73478000000	4316	30.2866	30.3804	30.2808	30.2303	30.0607	30.2976	30.2447	30.1293	30.2174	30.3617	30.3201		P60843	IF4A1_MOUSE	Eif4a1	Eukaryotic initiation factor 4A-I
P60867	RS20_MOUSE	Rps20	40S ribosomal protein S20		0.819971	0.146547	10	10	10	48.7	48.7	48.7	13.373	0	175.32	51362000000	970	29.7135	29.7729	29.9275	29.6863	29.431	29.6952	29.753	29.7248	29.3377	29.8007	29.7149		P60867	RS20_MOUSE	Rps20	40S ribosomal protein S20
P60898	RPB9_MOUSE	Polr2i	DNA-directed RNA polymerase II subunit RPB9		0.472016	-0.395206	4	4	4	49.6	49.6	49.6	14.523	0.00029824	10.526	53632000	22	21.2471	21.3714	NaN	20.807	21.3779	NaN	NaN	22.2759	NaN	21.3976	21.1234		P60898	RPB9_MOUSE	Polr2i	DNA-directed RNA polymerase II subunit RPB9
A2AUE1	A2AUE1_MOUSE	Dnajc5	DnaJ homolog subfamily C member 5 (Fragment)		1.3174	0.333971	4	4	4	22.7	22.7	22.7	15.819	0	218.92	364290000	37	23.9737	24.1115	24.268	24.252	23.9561	24.2488	24.3915	24.0922	23.303	24.0421	24.1552		A2AUE1	A2AUE1_MOUSE	Dnajc5	DnaJ homolog subfamily C member 5 (Fragment)
P61021	RAB5B_MOUSE	Rab5b	Ras-related protein Rab-5B		0.0316092	-0.0136452	7	4	4	42.3	27.4	27.4	23.707	0	24.87	173490000	67	23.7791	24.2237	23.6479	24.2224	24.0503	23.4677	24.1386	23.9508	24.0474	23.9384	23.9563		P61021	RAB5B_MOUSE	Rab5b	Ras-related protein Rab-5B
P61022	CHP1_MOUSE	Chp1	Calcineurin B homologous protein 1		0.954529	-0.213837	16	16	16	76.4	76.4	76.4	22.432	0	182.58	1440500000	261	24.1929	24.0274	24.0856	24.0647	24.1853	24.1595	24.3187	24.6374	24.6185	24.3985	24.0376		P61022	CHP1_MOUSE	Chp1	Calcineurin B homologous protein 1
P61027	RAB10_MOUSE	Rab10	Ras-related protein Rab-10		0.239081	0.135119	7	6	6	30	24.5	24.5	22.541	0	46.426	809010000	123	25.9286	26.0418	26.6903	25.6365	26.1906	26.2798	26.0762	26.511	25.444	25.7324	26.2522		P61027	RAB10_MOUSE	Rab10	Ras-related protein Rab-10
P61028	RAB8B_MOUSE	Rab8b	Ras-related protein Rab-8B		0	0.800673	8	2	2	36.7	12.6	12.6	23.603	0.0012844	5.7626	30515000	13	20.6574	NaN	NaN	NaN	19.3647	NaN	21.4536	20.8745	21.0428	NaN	21.3251		P61028	RAB8B_MOUSE	Rab8b	Ras-related protein Rab-8B
A0A0G2JE32	A0A0G2JE32_MOUSE	Ube2d3	Ubiquitin-conjugating enzyme E2 D3 (Fragment)		1.13476	0.361154	5	5	2	47.7	47.7	7.6	14.731	0	48.253	2870400000	210	27.8321	28.0289	27.5875	27.9701	27.8986	28.1607	27.5798	27.1782	27.588	27.3101	27.2185		A0A0G2JE32	A0A0G2JE32_MOUSE	Ube2d3	Ubiquitin-conjugating enzyme E2 D3 (Fragment)
P61082	UBC12_MOUSE	Ube2m	NEDD8-conjugating enzyme Ubc12		0.613903	0.160613	7	7	7	43.2	43.2	43.2	20.9	0	19.356	1503600000	179	24.717	24.721	24.8694	24.7588	24.5132	24.8056	24.7463	24.8228	24.0954	24.8067	24.7626		P61082	UBC12_MOUSE	Ube2m	NEDD8-conjugating enzyme Ubc12
P61087	UBE2K_MOUSE	Ube2k	Ubiquitin-conjugating enzyme E2 K		0.20015	-0.0485271	15	15	15	81	81	81	22.406	0	229.26	2488600000	351	26.052	26.2236	26.0203	25.826	26.2991	25.9227	26.0916	25.7901	26.0517	26.1579	26.0413		P61087	UBE2K_MOUSE	Ube2k	Ubiquitin-conjugating enzyme E2 K
P61089	UBE2N_MOUSE	Ube2n	Ubiquitin-conjugating enzyme E2 N		0.47255	0.0880203	13	13	13	79.6	79.6	79.6	17.138	0	323.31	6083200000	477	27.66	27.7241	27.9591	27.7932	27.6828	27.7111	27.9161	27.4826	27.7503	27.9299	27.8905		P61089	UBE2N_MOUSE	Ube2n	Ubiquitin-conjugating enzyme E2 N
P61148	FGF1_MOUSE	Fgf1	Fibroblast growth factor 1		2.01795	-0.267718	4	4	4	32.9	32.9	32.9	17.417	0.00028361	8.7028	31786000	25	22.6661	22.4328	22.593	22.4965	22.6543	22.2665	22.2635	NaN	22.6485	22.7438	NaN		P61148	FGF1_MOUSE	Fgf1	Fibroblast growth factor 1
P61161	ARP2_MOUSE	Actr2	Actin-related protein 2		0.319728	-0.0524555	22	22	22	60.9	60.9	60.9	44.76	0	323.31	6225300000	677	26.9761	26.9658	26.8762	26.7651	26.9604	26.7323	27.0184	26.7455	26.9164	26.8683	27.0774		P61161	ARP2_MOUSE	Actr2	Actin-related protein 2
P61164	ACTZ_MOUSE	Actr1a	Alpha-centractin		0.456334	-0.103033	19	19	10	65.4	65.4	40.2	42.613	0	323.31	4878400000	525	27.3347	27.464	27.4088	27.3782	27.6514	26.9914	27.2438	27.3623	27.3744	27.185	27.4939		P61164	ACTZ_MOUSE	Actr1a	Alpha-centractin
P61166	TM258_MOUSE	Tmem258	Transmembrane protein 258		0.407223	0.35128	1	1	1	10.1	10.1	10.1	9.0788	0.0064848	3.344	367540000	67	NaN	NaN	NaN	24.8235	23.8201	24.917	24.1325	NaN	24.7533	24.2458	NaN		P61166	TM258_MOUSE	Tmem258	Transmembrane protein 258
P61202	CSN2_MOUSE	Cops2	COP9 signalosome complex subunit 2		0.885516	0.121262	15	15	15	36.3	36.3	36.3	51.596	0	89.918	3001900000	300	27.7667	27.7536	27.8492	27.9066	27.5113	27.6577	27.6888	27.84	27.543	27.5779	27.6605		P61202	CSN2_MOUSE	Cops2	COP9 signalosome complex subunit 2
P61205	ARF3_MOUSE	Arf3	ADP-ribosylation factor 3		0	-0.489422	20	1	1	90.1	16	16	20.601	0	125.55	85639000	11	25.626	25.4628	NaN	24.8103	NaN	NaN	NaN	NaN	NaN	NaN	NaN		P61205	ARF3_MOUSE	Arf3	ADP-ribosylation factor 3
P61211	ARL1_MOUSE	Arl1	ADP-ribosylation factor-like protein 1		0.801149	-0.199904	9	9	9	72.9	72.9	72.9	20.411	0	205.24	1661700000	347	27.121	27.3148	27.0061	26.9552	27.5495	26.658	26.9677	26.9732	27.1215	27.0894	27.227		P61211	ARL1_MOUSE	Arl1	ADP-ribosylation factor-like protein 1
P61222	ABCE1_MOUSE	Abce1	ATP-binding cassette sub-family E member 1		0.348059	-0.0539616	32	32	32	61.4	61.4	61.4	67.314	0	323.31	6896600000	928	26.795	26.9546	26.8017	26.8872	26.8418	26.9095	26.8087	26.9969	26.8833	27.1746	26.8661		P61222	ABCE1_MOUSE	Abce1	ATP-binding cassette sub-family E member 1
P61255	RL26_MOUSE	Rpl26	60S ribosomal protein L26		0.17523	-0.0566361	16	16	16	56.6	56.6	56.6	17.258	0	100.13	17502000000	943	29.0772	28.9124	29.3394	28.9097	28.9049	29.3193	29.319	29.4353	29.3177	29.355	29.2093		P61255	RL26_MOUSE	Rpl26	60S ribosomal protein L26
P61290	PSME3_MOUSE	Psme3	Proteasome activator complex subunit 3		1.13816	0.138325	12	12	12	47.6	47.6	47.6	29.506	0	63.836	951970000	212	25.4873	25.5436	25.4508	25.3552	25.2844	25.5416	25.6344	25.2358	25.4823	25.2638	25.4471		P61290	PSME3_MOUSE	Psme3	Proteasome activator complex subunit 3
P61327	MGN_MOUSE	Magoh	Protein mago nashi homolog		0.122512	0.0236476	6	6	6	30.8	30.8	30.8	17.163	0	26.04	252170000	50	23.331	23.5192	23.1374	23.2968	23.2043	23.2302	23.2033	23.1651	23.1838	23.4081	23.2302		P61327	MGN_MOUSE	Magoh	Protein mago nashi homolog
P61358	RL27_MOUSE	Rpl27	60S ribosomal protein L27		0.446286	-0.0547159	10	10	10	49.3	49.3	49.3	15.798	0	323.31	42005000000	1115	30.2473	30.2445	30.3128	30.1633	30.2839	30.2441	30.4271	30.3437	30.4731	30.3951	30.2553		P61358	RL27_MOUSE	Rpl27	60S ribosomal protein L27
P61514	RL37A_MOUSE	Rpl37a	60S ribosomal protein L37a		0.776116	-0.239818	5	5	5	51.1	51.1	51.1	10.275	0	323.31	5011600000	428	28.2281	28.2839	27.4571	28.023	28.2434	28.0057	28.1916	28.2762	27.9032	28.5511	28.1904		P61514	RL37A_MOUSE	Rpl37a	60S ribosomal protein L37a
P61600	NAA20_MOUSE	Naa20	N-alpha-acetyltransferase 20		0.287347	-0.27646	4	4	4	27	27	27	20.368	0.001503	5.2191	104410000	24	22.8071	20.9345	22.6604	22.558	NaN	23.0611	22.9821	22.9327	22.991	22.4051	22.4427		P61600	NAA20_MOUSE	Naa20	N-alpha-acetyltransferase 20
P61620	S61A1_MOUSE	Sec61a1	Protein transport protein Sec61 subunit alpha isoform 1		0.259069	-0.0839013	19	19	19	42	42	42	52.264	0	323.31	18573000000	1165	29.6589	29.4364	29.603	29.4834	29.8041	29.1987	29.6556	29.5754	29.3411	29.176	29.8004		P61620	S61A1_MOUSE	Sec61a1	Protein transport protein Sec61 subunit alpha isoform 1
P61750	ARF4_MOUSE	Arf4	ADP-ribosylation factor 4		0.461045	-0.128008	16	10	8	88.3	55	43.9	20.396	0	299.86	6631800000	549	27.4854	27.6766	27.5095	27.1393	27.6811	27.1361	27.1398	27.4514	27.1845	27.3454	27.5419		P61750	ARF4_MOUSE	Arf4	ADP-ribosylation factor 4
P61759	PFD3_MOUSE	Vbp1	Prefoldin subunit 3		0.0662906	-0.0229347	6	6	6	32.1	32.1	32.1	22.435	0.00029206	9.6641	432350000	46	24.8563	24.7277	24.8613	24.66	24.3024	24.4946	24.574	24.5983	NaN	24.823	24.8522		P61759	PFD3_MOUSE	Vbp1	Prefoldin subunit 3
P61804	DAD1_MOUSE	Dad1	Dolichyl-diphosphooligosaccharide--protein glycosyltransferase subunit DAD1		0.243553	-0.135049	4	4	4	28.3	28.3	28.3	12.497	0	82.008	1819500000	120	26.4824	26.5773	25.435	26.3789	26.52	26.5828	26.821	26.1882	26.5576	26.6497	26.5665		P61804	DAD1_MOUSE	Dad1	Dolichyl-diphosphooligosaccharide--protein glycosyltransferase subunit DAD1
P61924	COPZ1_MOUSE	Copz1	Coatomer subunit zeta-1		0.559784	-0.0920296	8	8	8	45.8	45.8	45.8	20.198	0	213.76	4670900000	464	26.8007	26.9039	26.8334	26.7195	26.8768	26.5536	26.4921	26.7608	26.888	26.7288	26.7001		P61924	COPZ1_MOUSE	Copz1	Coatomer subunit zeta-1
H7BWX9	H7BWX9_MOUSE	Sumo2	Small ubiquitin-related modifier 2		2.50172	0.669166	3	3	2	49.1	49.1	26.4	6.0139	0	101.93	1507000000	104	26.0523	NaN	26.894	26.5546	26.3461	27.1742	NaN	26.1993	25.9923	26.4095	26.231		H7BWX9	H7BWX9_MOUSE	Sumo2	Small ubiquitin-related modifier 2
P61961	UFM1_MOUSE	Ufm1	Ubiquitin-fold modifier 1		0.0352471	-0.0247911	5	5	5	72.9	72.9	72.9	9.1175	0	167.61	2796100000	209	27.9226	27.8039	28.1712	28.1943	28.1095	27.3007	27.7269	27.7034	28.306	27.0749	28.0686		P61961	UFM1_MOUSE	Ufm1	Ubiquitin-fold modifier 1
P61963	DCAF7_MOUSE	Dcaf7	DDB1- and CUL4-associated factor 7		1.27474	-0.364667	3	3	3	9.9	9.9	9.9	38.926	0.00028058	8.3425	244150000	34	23.5019	23.6609	23.6664	23.7821	24.034	23.4135	23.0078	24.0669	23.9897	23.9825	23.6499		P61963	DCAF7_MOUSE	Dcaf7	DDB1- and CUL4-associated factor 7
P61967	AP1S1_MOUSE	Ap1s1	AP-1 complex subunit sigma-1A		0.654053	0.243132	7	7	7	44.3	44.3	44.3	18.733	0	249.12	1152500000	147	26.2398	26.4656	26.6919	26.2721	25.9453	26.9399	26.8757	26.7624	26.6831	26.6084	26.1964		P61967	AP1S1_MOUSE	Ap1s1	AP-1 complex subunit sigma-1A
P61971	NTF2_MOUSE	Nutf2	Nuclear transport factor 2		0.121912	0.0622063	6	6	6	76.4	76.4	76.4	14.478	0	148.99	2198300000	140	27.201	27.087	26.5161	27.4729	27.1052	26.9403	26.9472	26.8213	27.0633	26.376	27.0161		P61971	NTF2_MOUSE	Nutf2	Nuclear transport factor 2
P61979	HNRPK_MOUSE	Hnrnpk	Heterogeneous nuclear ribonucleoprotein K		0	NaN	30	1	1	70	7.8	7.8	50.976	0	36.491	207460000	41	NaN	NaN	NaN	NaN	NaN	NaN	NaN	NaN	NaN	NaN	NaN		P61979	HNRPK_MOUSE	Hnrnpk	Heterogeneous nuclear ribonucleoprotein K
P61982	1433G_MOUSE	Ywhag	14-3-3 protein gamma		0.640196	0.157421	16	11	11	69.6	59.9	59.9	28.302	0	323.31	8269000000	547	27.6846	27.6701	27.494	27.7876	27.2225	27.5382	27.369	27.4743	27.1783	27.2552	27.6715		P61982	1433G_MOUSE	Ywhag	14-3-3 protein gamma
A0A2I3BQ16	A0A2I3BQ16_MOUSE	Lrch1	Leucine-rich repeat and calponin homology domain-containing protein 1		0	-0.224234	2	2	2	4.1	4.1	4.1	76.058	0.0066771	3.2763	24804000	12	NaN	23.0482	23.0753	NaN	NaN	23.1774	23.7359	NaN	23.4835	NaN	NaN		A0A2I3BQ16	A0A2I3BQ16_MOUSE	Lrch1	Leucine-rich repeat and calponin homology domain-containing protein 1
P62071	RRAS2_MOUSE	Rras2	Ras-related protein R-Ras2		0	0.172826	5	3	3	32.8	19.6	19.6	23.399	0	71.149	157830000	30	23.6075	NaN	NaN	23.6577	23.1091	NaN	NaN	23.4841	NaN	23.2693	23.9546		P62071	RRAS2_MOUSE	Rras2	Ras-related protein R-Ras2
P62073	TIM10_MOUSE	Timm10	Mitochondrial import inner membrane translocase subunit Tim10		0.115351	0.119971	3	3	3	32.2	32.2	32.2	10.333	0	14.064	112940000	20	NaN	NaN	22.7031	NaN	22.3117	22.8518	NaN	NaN	NaN	23.0032	NaN		P62073	TIM10_MOUSE	Timm10	Mitochondrial import inner membrane translocase subunit Tim10
P62075	TIM13_MOUSE	Timm13	Mitochondrial import inner membrane translocase subunit Tim13		0.583831	-0.145935	5	5	5	69.5	69.5	69.5	10.458	0	23.426	1230300000	114	25.0694	24.8482	25.3356	25.2926	25.3617	25.1862	24.9712	25.4355	25.3138	25.4571	24.9987		P62075	TIM13_MOUSE	Timm13	Mitochondrial import inner membrane translocase subunit Tim13
P62077	TIM8B_MOUSE	Timm8b	Mitochondrial import inner membrane translocase subunit Tim8 B		0.278831	-0.1005	4	4	4	50.6	50.6	50.6	9.2864	0.0002986	10.541	359550000	86	24.2039	24.3143	24.1598	24.3821	24.3341	24.5345	24.6121	24.5416	24.5724	25.0357	24.3187		P62077	TIM8B_MOUSE	Timm8b	Mitochondrial import inner membrane translocase subunit Tim8 B
P62082	RS7_MOUSE	Rps7	40S ribosomal protein S7		0.174977	0.0507331	18	18	18	67.5	67.5	67.5	22.127	0	323.31	29779000000	1854	30.8458	30.7909	31.1651	30.7993	30.8112	31.1432	30.8692	31.1971	31.046	30.6495	30.8672		P62082	RS7_MOUSE	Rps7	40S ribosomal protein S7
P62137	PP1A_MOUSE	Ppp1ca	Serine/threonine-protein phosphatase PP1-alpha catalytic subunit		0.466657	0.0724903	20	20	6	62.7	62.7	19.4	37.54	0	323.31	4905600000	741	26.8869	26.9861	27.0151	26.6495	26.7574	26.9793	26.974	26.7585	26.8129	26.9384	26.9358		P62137	PP1A_MOUSE	Ppp1ca	Serine/threonine-protein phosphatase PP1-alpha catalytic subunit
P62141	PP1B_MOUSE	Ppp1cb	Serine/threonine-protein phosphatase PP1-beta catalytic subunit		0.154112	0.0412157	19	8	7	63	33.9	30.6	37.186	0	82.36	2495400000	255	26.4484	26.7442	26.4802	26.5384	26.4455	26.3204	26.666	26.4092	26.3199	26.8121	26.6165		P62141	PP1B_MOUSE	Ppp1cb	Serine/threonine-protein phosphatase PP1-beta catalytic subunit
P62192	PRS4_MOUSE	Psmc1	26S proteasome regulatory subunit 4		0.332189	0.0451335	28	28	28	62.7	62.7	62.7	49.184	0	298.07	4182400000	738	25.5879	25.73	25.7075	25.7146	25.6629	25.6643	25.6709	25.4673	25.8595	25.6472	25.6889		P62192	PRS4_MOUSE	Psmc1	26S proteasome regulatory subunit 4
P62196	PRS8_MOUSE	Psmc5	26S proteasome regulatory subunit 8		1.0688	0.124824	28	28	28	70.7	70.7	70.7	45.626	0	323.31	4291400000	710	26.5014	26.6634	26.5255	26.6732	26.5769	26.4948	26.4116	26.3544	26.3251	26.3475	26.4681		P62196	PRS8_MOUSE	Psmc5	26S proteasome regulatory subunit 8
P62242	RS8_MOUSE	Rps8	40S ribosomal protein S8		0.589162	0.11525	24	24	24	62.5	62.5	62.5	24.205	0	323.31	44799000000	1937	30.0196	29.8226	30.0157	29.7801	29.5532	29.9235	29.6548	29.7637	29.5627	29.7611	29.6843		P62242	RS8_MOUSE	Rps8	40S ribosomal protein S8
P62245	RS15A_MOUSE	Rps15a	40S ribosomal protein S15a		0.235018	0.049121	15	15	15	73.8	73.8	73.8	14.839	0	323.31	34674000000	1469	30.0104	29.8547	30.0142	29.9615	29.6179	29.9502	29.7295	29.8562	29.7264	30.0401	29.8665		P62245	RS15A_MOUSE	Rps15a	40S ribosomal protein S15a
P62254	UB2G1_MOUSE	Ube2g1	Ubiquitin-conjugating enzyme E2 G1		0.535675	0.153803	6	6	6	27.6	27.6	27.6	19.509	0	15.443	182200000	37	24.2075	24.5964	24.5874	24.0783	24.305	24.3352	24.2551	24.1541	23.9007	24.5982	24.1347		P62254	UB2G1_MOUSE	Ube2g1	Ubiquitin-conjugating enzyme E2 G1
E9Q3U1	E9Q3U1_MOUSE	Ube2h	Ubiquitin-conjugating enzyme E2 H		0.282548	-0.0925589	5	5	5	32.9	32.9	32.9	17.174	0	16.98	516900000	77	24.4196	24.3554	NaN	24.261	24.2628	23.8307	23.8359	24.0036	24.2066	23.9945	24.0927		E9Q3U1	E9Q3U1_MOUSE	Ube2h	Ubiquitin-conjugating enzyme E2 H
P62259	1433E_MOUSE	Ywhae	14-3-3 protein epsilon		0.57658	0.0817981	29	29	27	80.4	80.4	80.4	29.174	0	323.31	48296000000	2176	30.0847	30.1769	30.1074	29.9939	29.8593	29.9636	30.0499	29.9832	30.0544	29.7772	30.1004		P62259	1433E_MOUSE	Ywhae	14-3-3 protein epsilon
P62264	RS14_MOUSE	Rps14	40S ribosomal protein S14		0.253767	-0.0291962	13	13	13	70.2	70.2	70.2	16.273	0	323.31	23601000000	1254	28.076	27.9895	28.2296	28.0494	28.006	28.0833	28.0577	28.0765	28.1848	28.1479	28.1753		P62264	RS14_MOUSE	Rps14	40S ribosomal protein S14
P62267	RS23_MOUSE	Rps23	40S ribosomal protein S23		0.114376	0.0385303	8	8	8	43.4	43.4	43.4	15.807	0	120.33	13215000000	656	29.6851	29.5533	29.8989	29.295	29.2118	29.527	29.6247	29.7451	29.6879	29.4318	29.4859		P62267	RS23_MOUSE	Rps23	40S ribosomal protein S23
F6YVP7	F6YVP7_MOUSE	Rps18-ps6	40S ribosomal protein S18		0.031794	-0.00986226	20	20	20	65.1	65.1	65.1	17.671	0	323.31	39477000000	1708	31.0357	30.6659	31.1628	30.9163	30.9193	31.2847	30.924	31.1142	30.8453	31.1053	30.9838		F6YVP7	F6YVP7_MOUSE	Rps18-ps6	40S ribosomal protein S18
P62274	RS29_MOUSE	Rps29	40S ribosomal protein S29		0.555343	-0.217514	4	4	4	48.2	48.2	48.2	6.6767	0	69.393	11328000000	485	28.082	27.723	27.7624	27.9684	28.0522	28.2296	28.0549	28.1297	28.9044	27.8995	27.9233		P62274	RS29_MOUSE	Rps29	40S ribosomal protein S29
P62281	RS11_MOUSE	Rps11	40S ribosomal protein S11		0.171944	-0.0470525	24	24	24	74.7	74.7	74.7	18.431	0	323.31	39664000000	1586	29.7705	29.5657	29.8697	29.5362	29.6475	30.0491	29.7486	29.9033	29.8424	30.0012	29.6407		P62281	RS11_MOUSE	Rps11	40S ribosomal protein S11
P62301	RS13_MOUSE	Rps13	40S ribosomal protein S13		0.0348668	0.0113213	16	16	16	64.9	64.9	64.9	17.222	0	323.31	47961000000	2081	29.7368	29.7139	30.0367	29.9394	29.7046	30.0107	29.5682	30.1424	29.7947	29.957	29.7193		P62301	RS13_MOUSE	Rps13	40S ribosomal protein S13
P62305	RUXE_MOUSE	Snrpe	Small nuclear ribonucleoprotein E		0	NaN	3	3	3	29.3	29.3	29.3	10.803	0.001506	5.256	373960000	25	NaN	NaN	NaN	26.8471	NaN	26.7686	NaN	NaN	NaN	NaN	NaN		P62305	RUXE_MOUSE	Snrpe	Small nuclear ribonucleoprotein E
P62307	RUXF_MOUSE	Snrpf	Small nuclear ribonucleoprotein F		0	-0.107155	3	3	3	48.8	48.8	48.8	9.7251	0	34.467	45619000	17	NaN	NaN	NaN	NaN	NaN	NaN	21.7439	NaN	NaN	21.8511	NaN		P62307	RUXF_MOUSE	Snrpf	Small nuclear ribonucleoprotein F
P62311	LSM3_MOUSE	Lsm3	U6 snRNA-associated Sm-like protein LSm3		0.68074	0.236123	2	2	2	32.4	32.4	32.4	11.845	0.0012807	5.6706	59394000	22	NaN	22.134	21.7995	NaN	21.9776	22.1571	22.0873	21.4705	21.6717	22.1135	NaN		P62311	LSM3_MOUSE	Lsm3	U6 snRNA-associated Sm-like protein LSm3
P62315	SMD1_MOUSE	Snrpd1	Small nuclear ribonucleoprotein Sm D1		0.163297	0.0722236	3	3	3	45.4	45.4	45.4	13.281	0	41.39	518620000	126	24.0532	23.795	23.9055	23.4907	23.5485	24.5193	23.9305	23.823	24.0551	23.7942	23.8618		P62315	SMD1_MOUSE	Snrpd1	Small nuclear ribonucleoprotein Sm D1
P62317	SMD2_MOUSE	Snrpd2	Small nuclear ribonucleoprotein Sm D2		0.0934536	0.0521425	7	7	7	56.8	56.8	56.8	13.527	0	116.56	966980000	117	24.2329	24.0591	24.1715	24.537	24.0383	24.8665	24.3935	24.362	24.775	24.7751	23.9371		P62317	SMD2_MOUSE	Snrpd2	Small nuclear ribonucleoprotein Sm D2
P62320	SMD3_MOUSE	Snrpd3	Small nuclear ribonucleoprotein Sm D3		0.422411	0.129636	6	6	6	57.1	57.1	57.1	13.916	0	132.36	1298100000	113	26.6266	26.6964	26.6057	26.3631	26.1867	26.4428	26.8027	26.4875	26.8751	26.2341	26.305		P62320	SMD3_MOUSE	Snrpd3	Small nuclear ribonucleoprotein Sm D3
A0A0N4SVK3	A0A0N4SVK3_MOUSE	Lsm5	U6 snRNA-associated Sm-like protein LSm5		0	NaN	1	1	1	32.2	32.2	32.2	6.6106	0.0072432	3.1255	19826000	18	NaN	NaN	NaN	NaN	NaN	NaN	NaN	NaN	NaN	NaN	NaN		A0A0N4SVK3	A0A0N4SVK3_MOUSE	Lsm5	U6 snRNA-associated Sm-like protein LSm5
P62331	ARF6_MOUSE	Arf6	ADP-ribosylation factor 6		1.03707	-0.203858	10	10	10	75.4	75.4	75.4	20.082	0	247.74	1530700000	188	25.2894	25.304	25.018	25.0656	25.4771	24.7359	25.1827	25.208	25.0323	25.2729	25.3108		P62331	ARF6_MOUSE	Arf6	ADP-ribosylation factor 6
P62334	PRS10_MOUSE	Psmc6	26S proteasome regulatory subunit 10B		1.5132	0.0831739	26	26	26	73.8	73.8	73.8	44.172	0	243.04	5299800000	651	26.2887	26.3941	26.4524	26.4253	26.279	26.2687	26.3188	26.3165	26.2553	26.2807	26.3119		P62334	PRS10_MOUSE	Psmc6	26S proteasome regulatory subunit 10B
P62342	SELT_MOUSE	Selenot	Thioredoxin reductase-like selenoprotein T		0.509282	-0.223766	3	3	3	16.4	16.4	16.4	22.292	0.00053248	6.7508	210300000	45	22.8118	23.2466	22.6632	22.9418	23.469	23.3382	NaN	23.2118	23.7708	23.2669	23.097		P62342	SELT_MOUSE	Selenot	Thioredoxin reductase-like selenoprotein T
P62492	RB11A_MOUSE	Rab11a	Ras-related protein Rab-11A		0	NaN	13	1	1	61.1	13.4	13.4	24.393	0	26.389	5237400	3	NaN	NaN	NaN	NaN	NaN	NaN	NaN	NaN	NaN	NaN	NaN		P62492	RB11A_MOUSE	Rab11a	Ras-related protein Rab-11A
D3YW86	D3YW86_MOUSE	Tsc22d1	TSC22 domain family protein 1		0.0687362	-0.0286789	5	5	1	37.4	37.4	11.2	11.474	0	89.368	299150000	45	23.3167	23.0604	22.8881	23.5181	23.0404	NaN	NaN	23.2584	23.3446	23.1353	23.01		D3YW86	D3YW86_MOUSE	Tsc22d1	TSC22 domain family protein 1
P62627	DLRB1_MOUSE	Dynlrb1	Dynein light chain roadblock-type 1		0.126143	-0.0368529	8	8	8	83.3	83.3	83.3	10.99	0	58.364	1028600000	181	25.4205	25.5784	25.5352	25.5311	25.5503	25.5192	25.1502	25.5002	25.8403	25.3963	25.2904		P62627	DLRB1_MOUSE	Dynlrb1	Dynein light chain roadblock-type 1
P62631	EF1A2_MOUSE	Eef1a2	Elongation factor 1-alpha 2		0.369617	0.36308	23	3	3	50.5	16.6	16.6	50.454	0.0015357	5.6382	1190400000	24	27.2059	27.7606	27.1045	28.1971	27.4693	NaN	NaN	26.5948	NaN	28.2345	27.1171		P62631	EF1A2_MOUSE	Eef1a2	Elongation factor 1-alpha 2
P62702	RS4X_MOUSE	Rps4x	40S ribosomal protein S4, X isoform		0.0259713	0.00507991	31	31	18	73	73	50.6	29.597	0	323.31	94803000000	2836	31.2983	31.2996	31.3476	31.1464	31.04	31.3723	31.19	31.3279	31.3368	31.3713	31.2225		P62702	RS4X_MOUSE	Rps4x	40S ribosomal protein S4, X isoform
P62715	PP2AB_MOUSE	Ppp2cb	Serine/threonine-protein phosphatase 2A catalytic subunit beta isoform		0	NaN	17	1	1	70.6	4.2	4.2	35.575	0	100.9	48874000	20	NaN	NaN	NaN	NaN	NaN	NaN	NaN	NaN	NaN	NaN	NaN		P62715	PP2AB_MOUSE	Ppp2cb	Serine/threonine-protein phosphatase 2A catalytic subunit beta isoform
P62717	RL18A_MOUSE	Rpl18a	60S ribosomal protein L18a		0.0445465	-0.0171116	20	20	1	63.6	63.6	4.5	20.732	0	323.31	24079000000	1015	30.4511	30.1328	30.4603	30.1897	30.0397	30.6733	30.2049	30.5056	30.2499	30.6391	30.2105		P62717	RL18A_MOUSE	Rpl18a	60S ribosomal protein L18a
P62737	ACTA_MOUSE	Acta2	Actin, aortic smooth muscle		0.0610852	-0.0779692	46	2	1	98.7	8	5	42.009	0	96.209	19050000000	953	31.1815	30.7906	31.4593	30.1573	31.4376	33.0421	31.95	31.5391	31.6922	31.8735	31.6232		P62737	ACTA_MOUSE	Acta2	Actin, aortic smooth muscle
P62743	AP2S1_MOUSE	Ap2s1	AP-2 complex subunit sigma		0.0488462	0.0122051	5	5	5	33.8	33.8	33.8	17.018	0	12.923	1040300000	112	27.7765	27.5896	27.7889	27.6075	27.5385	27.7808	27.9851	27.8442	27.8833	27.7701	27.6165		P62743	AP2S1_MOUSE	Ap2s1	AP-2 complex subunit sigma
P62748	HPCL1_MOUSE	Hpcal1	Hippocalcin-like protein 1		0.1032	0.0734908	6	6	5	46.1	46.1	39.4	22.338	0.00028035	8.2961	176330000	31	23.7858	24.3024	NaN	23.6749	23.5667	NaN	24.1189	23.8521	24.6742	24.1054	23.7674		P62748	HPCL1_MOUSE	Hpcal1	Hippocalcin-like protein 1
P62751	RL23A_MOUSE	Rpl23a	60S ribosomal protein L23a		0.172236	0.0402346	15	15	15	46.8	46.8	46.8	17.695	0	323.31	32540000000	1195	29.0122	28.8264	29.0636	28.7667	28.7308	28.9143	28.9488	28.8803	28.5799	29.0325	28.9465		P62751	RL23A_MOUSE	Rpl23a	60S ribosomal protein L23a
P62754	RS6_MOUSE	Rps6	40S ribosomal protein S6		0.379613	-0.0655924	20	20	20	46.6	46.6	46.6	28.68	0	323.31	25436000000	1447	28.5356	28.4552	28.6203	28.4073	28.3221	28.5172	28.3349	28.551	28.758	28.5513	28.4772		P62754	RS6_MOUSE	Rps6	40S ribosomal protein S6
P62774	MTPN_MOUSE	Mtpn	Myotrophin		0.216536	0.0504847	8	8	8	85.6	85.6	85.6	12.861	0	323.31	4188100000	480	26.2682	26.3723	26.2251	26.2588	26.4192	26.2206	26.0646	26.0737	25.9269	26.0634	26.3154		P62774	MTPN_MOUSE	Mtpn	Myotrophin
P62806	H4_MOUSE	H4c1	Histone H4		0.0458604	-0.0513362	13	13	13	65	65	65	11.367	0	195.32	8626200000	666	27.6552	29.0579	27.593	27.1548	28.2219	28.2978	28.624	27.8368	29.1784	27.9306	28.3582		P62806	H4_MOUSE	H4c1	Histone H4
M0QWG9	M0QWG9_MOUSE	Wfdc18	WAP four-disulfide core domain protein 18 (Fragment)		0.122009	0.0782988	3	3	3	47.9	47.9	47.9	7.5278	0	17.387	1235600000	67	25.9355	25.6086	25.7219	26.1583	25.784	25.2309	26.4155	25.9927	25.7106	25.0899	25.9796		M0QWG9	M0QWG9_MOUSE	Wfdc18	WAP four-disulfide core domain protein 18 (Fragment)
P62814	VATB2_MOUSE	Atp6v1b2	V-type proton ATPase subunit B, brain isoform		0.830638	0.122534	30	30	22	71.6	71.6	52.4	56.55	0	323.31	8786500000	1094	28.3685	28.3408	28.5548	28.4341	28.3297	28.4537	28.2222	28.1541	28.1104	28.2598	28.4488		P62814	VATB2_MOUSE	Atp6v1b2	V-type proton ATPase subunit B, brain isoform
P62821	RAB1A_MOUSE	Rab1A	Ras-related protein Rab-1A		0.0776954	0.052406	18	1	1	79	5.9	5.9	22.677	0.0066741	3.2742	207870000	55	23.2137	22.9474	NaN	23.0883	23.5878	NaN	23.6308	23.179	22.5591	23.1528	23.3261		P62821	RAB1A_MOUSE	Rab1A	Ras-related protein Rab-1A
P62827	RAN_MOUSE	Ran	GTP-binding nuclear protein Ran		0.248824	0.0465985	19	19	19	53.7	53.7	53.7	24.423	0	323.31	14091000000	959	29.0821	29.3197	29.0327	29.2934	29.1336	29.3515	29.2793	29.1129	29.23	29.4306	29.2631		P62827	RAN_MOUSE	Ran	GTP-binding nuclear protein Ran
P62830	RL23_MOUSE	Rpl23	60S ribosomal protein L23		1.61179	-0.192955	13	13	13	62.1	62.1	62.1	14.865	0	323.31	21393000000	939	29.0944	29.1331	29.0636	29.0263	29.2295	29.1683	29.1434	29.3606	29.4309	29.483	29.201		P62830	RL23_MOUSE	Rpl23	60S ribosomal protein L23
P62835	RAP1A_MOUSE	Rap1a	Ras-related protein Rap-1A		0.942784	0.260882	14	14	4	64.7	64.7	19	20.987	0	219.54	3946500000	461	27.18	27.3319	27.2859	27.2752	27.096	26.9951	27.224	26.8586	27.0184	26.3907	27.2255		P62835	RAP1A_MOUSE	Rap1a	Ras-related protein Rap-1A
P62843	RS15_MOUSE	Rps15	40S ribosomal protein S15		1.18377	0.22047	7	7	1	67.6	67.6	15.2	17.04	0	323.31	20044000000	1033	28.8046	28.9783	28.8977	29.1037	28.511	28.8017	28.697	28.7561	28.7154	28.3898	28.8745		P62843	RS15_MOUSE	Rps15	40S ribosomal protein S15
P62849	RS24_MOUSE	Rps24	40S ribosomal protein S24		0.502874	-0.0646318	8	8	8	41.4	41.4	41.4	15.423	0	108.49	11370000000	611	29.8065	29.6522	29.7629	29.6612	29.7379	29.4521	29.8139	29.7212	29.7692	29.6602	29.7035		P62849	RS24_MOUSE	Rps24	40S ribosomal protein S24
A0A1L1SQA8	A0A1L1SQA8_MOUSE	Rps25	40S ribosomal protein S25		0.286383	0.0538041	7	7	7	44.1	44.1	44.1	10.309	0	161.53	24738000000	664	28.8407	28.9215	28.9898	28.8662	28.5304	28.9211	28.8592	28.9133	28.9291	29.0212	28.9118		A0A1L1SQA8	A0A1L1SQA8_MOUSE	Rps25	40S ribosomal protein S25
P62855	RS26_MOUSE	Rps26	40S ribosomal protein S26		0.590617	-0.0973391	6	6	6	37.4	37.4	37.4	13.015	0	195.4	22925000000	688	29.4805	29.5265	29.4745	29.3478	29.4008	29.3777	29.6894	29.7211	29.7111	29.6371	29.5326		P62855	RS26_MOUSE	Rps26	40S ribosomal protein S26
G3UYV7	G3UYV7_MOUSE	Rps28	40S ribosomal protein S28 (Fragment)		0.341559	-0.159806	6	6	6	75	75	75	6.3442	0	323.31	11903000000	679	28.5022	28.1202	27.8577	27.8334	28.5397	27.9626	27.4894	27.9164	27.7595	27.6894	27.6675		G3UYV7	G3UYV7_MOUSE	Rps28	40S ribosomal protein S28 (Fragment)
P62862	RS30_MOUSE	Fau	40S ribosomal protein S30		0.026881	-0.031274	3	3	3	20.3	20.3	20.3	6.6478	0	13.645	5127300000	277	30.1271	29.2946	30.2637	29.7867	29.3854	31.0135	30.1112	30.1346	30.5173	31.1988	29.3881		P62862	RS30_MOUSE	Fau	40S ribosomal protein S30
P62869	ELOB_MOUSE	Elob	Elongin-B		0.130927	0.0285162	8	8	8	81.4	81.4	81.4	13.17	0	74.567	1743600000	179	26.7282	26.38	26.6283	26.5263	26.3122	26.7434	26.6218	26.5926	26.5654	26.6095	26.5006		P62869	ELOB_MOUSE	Elob	Elongin-B
P62874	GBB1_MOUSE	Gnb1	Guanine nucleotide-binding protein G(I)/G(S)/G(T) subunit beta-1		0.480586	0.106141	15	9	9	42.9	24.7	24.7	37.377	0	323.31	1284300000	186	24.8857	25.0054	24.9712	25.021	24.7837	24.4831	24.9433	24.6039	24.8859	24.7272	24.7855		P62874	GBB1_MOUSE	Gnb1	Guanine nucleotide-binding protein G(I)/G(S)/G(T) subunit beta-1
P62878	RBX1_MOUSE	Rbx1	E3 ubiquitin-protein ligase RBX1		0.251634	0.102069	3	3	3	30.6	30.6	30.6	12.274	0	92.344	283460000	30	23.3941	24.1497	23.9439	23.6724	23.7157	23.5842	23.6165	24.137	23.3108	23.7405	23.8495		P62878	RBX1_MOUSE	Rbx1	E3 ubiquitin-protein ligase RBX1
P62880	GBB2_MOUSE	Gnb2	Guanine nucleotide-binding protein G(I)/G(S)/G(T) subunit beta-2		0.710443	0.148744	16	16	7	58.2	58.2	32.1	37.331	0	323.31	3164500000	386	25.6784	25.897	25.387	25.7455	25.5978	25.5558	25.9425	25.3989	25.5074	25.6616	25.4967		P62880	GBB2_MOUSE	Gnb2	Guanine nucleotide-binding protein G(I)/G(S)/G(T) subunit beta-2
P62889	RL30_MOUSE	Rpl30	60S ribosomal protein L30		0.0302317	-0.00910765	9	9	9	60	60	60	12.784	0	323.31	22834000000	1048	30.4663	30.2188	30.4966	30.3991	30.2216	30.5863	30.2087	30.5048	30.49	30.549	30.1143		P62889	RL30_MOUSE	Rpl30	60S ribosomal protein L30
P62892	RL39_MOUSE	Rpl39	60S ribosomal protein L39		0.0041674	-0.00281226	1	1	1	19.6	19.6	19.6	6.4066	0	99.642	3905100000	116	29.0317	28.4688	29.1503	28.9014	28.1601	28.8568	28.8279	29.0406	28.8647	29.4642	28.5018		P62892	RL39_MOUSE	Rpl39	60S ribosomal protein L39
P62897	CYC_MOUSE	Cycs	Cytochrome c, somatic		0.4166	-0.113803	14	14	14	64.8	64.8	64.8	11.605	0	323.31	22938000000	1249	30.1323	29.8267	30.3153	29.8105	30.2325	30.4194	29.9263	30.0723	30.2489	30.2963	30.0585		P62897	CYC_MOUSE	Cycs	Cytochrome c, somatic
P62900	RL31_MOUSE	Rpl31	60S ribosomal protein L31		0.0542296	0.0232515	10	10	10	53.6	53.6	53.6	14.463	0	79.08	16049000000	403	29.733	29.3265	29.5936	29.1936	28.9004	29.5763	29.3775	29.6739	29.2466	29.3804	29.4074		P62900	RL31_MOUSE	Rpl31	60S ribosomal protein L31
P62908	RS3_MOUSE	Rps3	40S ribosomal protein S3		0.127802	-0.0240079	36	36	36	90.9	90.9	90.9	26.674	0	323.31	64765000000	3090	30.2056	30.0229	30.2481	29.9713	29.9454	30.0921	30.0168	29.9636	30.2536	30.1285	30.0686		P62908	RS3_MOUSE	Rps3	40S ribosomal protein S3
P62911	RL32_MOUSE	Rpl32	60S ribosomal protein L32		0.284589	-0.101099	12	12	12	54.1	54.1	54.1	15.86	0	323.31	22446000000	1122	28.9567	28.9764	29.1736	28.6467	28.8886	29.2673	28.9313	29.1334	29.2391	29.5261	28.8572		P62911	RL32_MOUSE	Rpl32	60S ribosomal protein L32
P62915	TF2B_MOUSE	Gtf2b	Transcription initiation factor IIB		0	-0.0325222	3	3	3	12.7	12.7	12.7	34.819	0.0026166	4.2292	92397000	13	24.4248	24.3922	NaN	NaN	NaN	NaN	NaN	NaN	NaN	NaN	NaN		P62915	TF2B_MOUSE	Gtf2b	Transcription initiation factor IIB
P62918	RL8_MOUSE	Rpl8	60S ribosomal protein L8		0.0745601	0.0160566	21	21	21	61.9	61.9	61.9	28.024	0	323.31	43991000000	1366	29.485	29.3109	29.6432	29.4628	29.2107	29.4339	29.2766	29.4912	29.4148	29.5112	29.3435		P62918	RL8_MOUSE	Rpl8	60S ribosomal protein L8
P62960	YBOX1_MOUSE	Ybx1	Y-box-binding protein 1		0.163179	0.0564285	18	18	11	68.6	68.6	55.9	35.73	0	323.31	11372000000	545	27.1908	27.3782	27.4739	27.4157	27.0819	27.4358	27.638	27.4289	27.8795	27.3208	27.5693		P62960	YBOX1_MOUSE	Ybx1	Y-box-binding protein 1
P62965	RABP1_MOUSE	Crabp1	Cellular retinoic acid-binding protein 1		0.384687	0.28506	4	4	4	35	35	35	15.591	0.0002963	10.273	96067000	38	21.6717	22.4306	NaN	21.9576	NaN	NaN	21.7704	21.0924	22.1724	22.3054	21.5972		P62965	RABP1_MOUSE	Crabp1	Cellular retinoic acid-binding protein 1
P62983	RS27A_MOUSE	Rps27a	Ubiquitin-40S ribosomal protein S27a		0.0102476	-0.0019062	10	10	10	56.4	56.4	56.4	17.951	0	323.31	11015000000	669	27.1803	27.1202	27.2778	26.924	27.1216	27.1606	27.1865	27.1554	27.155	27.2128	26.9893		P62983	RS27A_MOUSE	Rps27a	Ubiquitin-40S ribosomal protein S27a
F8WJG3	F8WJG3_MOUSE	Tra2b	Transformer-2 protein homolog beta		0.614733	-0.526074	6	6	6	42	42	42	21.935	0.00055494	7.9176	126140000	29	23.3793	23.5285	NaN	22.552	NaN	24.0337	23.8524	23.9314	24.5455	24.6751	23.5574		F8WJG3	F8WJG3_MOUSE	Tra2b	Transformer-2 protein homolog beta
P63001	RAC1_MOUSE	Rac1	Ras-related C3 botulinum toxin substrate 1		0.0179348	0.00498645	11	11	6	57.8	57.8	34.9	21.45	0	48.305	6777500000	404	27.3691	27.4585	27.2282	27.3559	27.1307	27.3103	27.6371	27.3086	27.473	27.5456	27.531		P63001	RAC1_MOUSE	Rac1	Ras-related C3 botulinum toxin substrate 1
P63005	LIS1_MOUSE	Pafah1b1	Platelet-activating factor acetylhydrolase IB subunit beta		0.044095	-0.00849806	28	28	28	78	78	78	46.67	0	323.31	4550500000	439	25.7902	25.9511	25.8366	25.7244	25.7676	25.6347	25.9318	25.7348	25.8458	25.8165	25.9904		P63005	LIS1_MOUSE	Pafah1b1	Platelet-activating factor acetylhydrolase IB subunit beta
P63011	RAB3A_MOUSE	Rab3a	Ras-related protein Rab-3A		0	NaN	4	2	2	25	12.7	12.7	24.97	0.0026253	4.2723	30989000	11	NaN	NaN	NaN	NaN	21.4878	NaN	NaN	NaN	NaN	21.1894	NaN		P63011	RAB3A_MOUSE	Rab3a	Ras-related protein Rab-3A
P63017	HSP7C_MOUSE	Hspa8	Heat shock cognate 71 kDa protein		0.371559	0.0464663	52	52	38	76.5	76.5	63.8	70.87	0	323.31	176850000000	7246	30.0326	30.0065	30.0387	30.0566	29.8536	30.077	30.0865	29.9103	29.9631	30.1621	30.1179		P63017	HSP7C_MOUSE	Hspa8	Heat shock cognate 71 kDa protein
P63024	VAMP3_MOUSE	Vamp3	Vesicle-associated membrane protein 3		0.106777	0.0220313	7	7	6	64.1	64.1	55.3	11.48	0	323.31	1220800000	182	24.1984	24.1891	24.2509	24.2845	24.5334	24.4007	24.3568	24.2838	24.1525	24.3574	24.1207		P63024	VAMP3_MOUSE	Vamp3	Vesicle-associated membrane protein 3
P63028	TCTP_MOUSE	Tpt1	Translationally-controlled tumor protein		0.0380441	-0.0106694	9	9	9	57	57	57	19.462	0	323.31	30614000000	1153	29.5152	29.577	29.1324	29.2861	29.616	29.3571	29.4125	29.2335	29.2714	29.3103	29.2357		P63028	TCTP_MOUSE	Tpt1	Translationally-controlled tumor protein
P63030	MPC1_MOUSE	Mpc1	Mitochondrial pyruvate carrier 1		0.00263795	-0.000995318	8	8	8	66.1	66.1	66.1	12.454	0	323.31	3149700000	229	28.028	27.7078	28.2241	28.1122	28.3423	28.4393	28.0942	28.2424	27.9193	28.0964	28.0707		P63030	MPC1_MOUSE	Mpc1	Mitochondrial pyruvate carrier 1
P63037	DNJA1_MOUSE	Dnaja1	DnaJ homolog subfamily A member 1		0.288415	0.0603233	21	21	21	62	62	62	44.868	0	323.31	3441500000	412	26.4779	26.6078	26.4841	26.7813	26.5525	26.4309	26.6722	26.577	26.319	26.7821	26.5012		P63037	DNJA1_MOUSE	Dnaja1	DnaJ homolog subfamily A member 1
P63038	CH60_MOUSE	Hspd1	60 kDa heat shock protein, mitochondrial		0.034881	0.00977268	54	54	54	82	82	82	60.955	0	323.31	39318000000	3123	28.3654	28.4769	28.4411	28.6334	28.557	28.7707	28.2624	28.5821	28.487	28.6942	28.3572		P63038	CH60_MOUSE	Hspd1	60 kDa heat shock protein, mitochondrial
P63073	IF4E_MOUSE	Eif4e	Eukaryotic translation initiation factor 4E		1.95519	0.131023	11	11	11	49.8	49.8	49.8	25.053	0	168.39	4279800000	419	27.202	27.2684	27.2536	27.1836	27.046	27.3057	27.1737	27.1357	26.9998	27.0881	27.1642		P63073	IF4E_MOUSE	Eif4e	Eukaryotic translation initiation factor 4E
P63085	MK01_MOUSE	Mapk1	Mitogen-activated protein kinase 1		0.713825	-0.0617756	26	26	19	86	86	72.3	41.275	0	310.63	5573600000	620	26.0137	26.0971	25.9875	25.973	25.9792	26.0014	26.1069	26.1601	26.1615	26.1409	26.1141		P63085	MK01_MOUSE	Mapk1	Mitogen-activated protein kinase 1
P63087	PP1G_MOUSE	Ppp1cc	Serine/threonine-protein phosphatase PP1-gamma catalytic subunit		1.35018	0.23621	17	2	2	55.1	7.4	7.4	36.983	0	23.336	114690000	29	22.5111	NaN	22.603	22.651	22.3646	22.7324	22.7553	22.1329	22.5618	22.4509	22.6741		P63087	PP1G_MOUSE	Ppp1cc	Serine/threonine-protein phosphatase PP1-gamma catalytic subunit
P63094	GNAS2_MOUSE	Gnas	Guanine nucleotide-binding protein G(s) subunit alpha isoforms short		0.128204	-0.0327274	18	17	17	53	50.3	50.3	45.663	0	63.568	866270000	151	24.099	24.3095	24.018	24.1177	24.2442	23.762	24.0132	23.9282	23.9483	24.1682	24.073		P63094	GNAS2_MOUSE	Gnas	Guanine nucleotide-binding protein G(s) subunit alpha isoforms short
P63101	1433Z_MOUSE	Ywhaz	14-3-3 protein zeta/delta		0.342377	0.0665528	26	24	22	77.1	77.1	73.5	27.771	0	323.31	25387000000	1431	29.0994	28.9864	29.0027	28.9802	28.6028	28.8895	28.911	28.8631	28.8265	28.854	29.0786		P63101	1433Z_MOUSE	Ywhaz	14-3-3 protein zeta/delta
A0A0J9YUD8	A0A0J9YUD8_MOUSE	Hmgb1	High mobility group protein B1		0.0670239	-0.0228365	11	11	10	45.6	45.6	38.6	19.774	0	323.31	13754000000	704	27.618	27.6816	27.352	27.3979	27.3016	27.7444	27.772	27.6318	27.8075	27.8504	27.4652		A0A0J9YUD8	A0A0J9YUD8_MOUSE	Hmgb1	High mobility group protein B1
P63166	SUMO1_MOUSE	Sumo1	Small ubiquitin-related modifier 1		0.115318	0.0335209	4	4	4	29.7	29.7	29.7	11.557	0	16.072	123370000	23	22.4645	NaN	22.2614	22.4848	NaN	22.5395	22.5316	22.1566	22.6171	22.3282	22.5376		P63166	SUMO1_MOUSE	Sumo1	Small ubiquitin-related modifier 1
P63168	DYL1_MOUSE	Dynll1	Dynein light chain 1, cytoplasmic		0	NaN	4	1	1	50.6	24.7	24.7	10.366	0	16.18	122370000	30	NaN	NaN	NaN	NaN	NaN	NaN	NaN	NaN	NaN	NaN	NaN		P63168	DYL1_MOUSE	Dynll1	Dynein light chain 1, cytoplasmic
P63242	IF5A1_MOUSE	Eif5a	Eukaryotic translation initiation factor 5A-1		0.367913	0.051938	22	22	22	88.3	88.3	88.3	16.832	0	323.31	38772000000	1809	30.3521	30.598	30.3726	30.2888	30.2066	30.3281	30.3317	30.3993	30.3189	30.4393	30.2752		P63242	IF5A1_MOUSE	Eif5a	Eukaryotic translation initiation factor 5A-1
P63254	CRIP1_MOUSE	Crip1	Cysteine-rich protein 1		0.406349	-0.112872	3	3	3	55.8	55.8	55.8	8.5497	0	44.068	3486300000	201	26.09	26.0744	26.1367	26.0718	25.9329	25.7599	26.2265	26.0599	26.5955	26.2231	26.0992		P63254	CRIP1_MOUSE	Crip1	Cysteine-rich protein 1
P63260	ACTG_MOUSE	Actg1	Actin, cytoplasmic 2		0.430861	0.0695721	50	50	0	99.2	99.2	0	41.792	0	323.31	558420000000	13197	34.4287	34.3205	34.2322	34.1897	34.0473	34.2125	34.346	34.2161	34.0652	34.09	34.2962		P63260	ACTG_MOUSE	Actg1	Actin, cytoplasmic 2
P63268	ACTH_MOUSE	Actg2	Actin, gamma-enteric smooth muscle		0	NaN	42	1	1	94.9	4.8	4.8	41.876	0.00052645	6.4839	2979000	4	NaN	NaN	NaN	NaN	NaN	NaN	NaN	NaN	NaN	NaN	NaN		P63268	ACTH_MOUSE	Actg2	Actin, gamma-enteric smooth muscle
P63276	RS17_MOUSE	Rps17	40S ribosomal protein S17		0.407118	-0.0739722	11	11	11	54.8	54.8	54.8	15.524	0	148.44	21791000000	968	29.6485	29.7503	29.5143	29.5685	29.4647	29.6269	29.5324	29.8819	29.7436	29.7817	29.5142		P63276	RS17_MOUSE	Rps17	40S ribosomal protein S17
P63280	UBC9_MOUSE	Ube2i	SUMO-conjugating enzyme UBC9		0.0371548	0.0155872	11	11	11	60.8	60.8	60.8	18.007	0	36.752	833820000	139	25.0034	24.709	24.797	24.4775	24.3862	24.6577	24.8944	24.5088	25.1135	24.5409	24.5964		P63280	UBC9_MOUSE	Ube2i	SUMO-conjugating enzyme UBC9
P63325	RS10_MOUSE	Rps10	40S ribosomal protein S10		1.44201	-0.250647	17	2	2	59.4	9.1	9.1	18.916	0	323.31	11413000000	267	29.2169	29.1375	29.0942	28.8542	29.157	28.8425	28.8219	29.1904	29.4954	29.2128	28.9317		P63325	RS10_MOUSE	Rps10	40S ribosomal protein S10
P63328	PP2BA_MOUSE	Ppp3ca	Serine/threonine-protein phosphatase 2B catalytic subunit alpha isoform		1.56128	0.290914	11	11	6	30.3	30.3	17.7	58.643	0	38.773	503360000	83	23.7741	23.9007	23.9855	23.7166	23.6649	24.3035	24.1935	23.5271	23.766	23.915	23.7272		P63328	PP2BA_MOUSE	Ppp3ca	Serine/threonine-protein phosphatase 2B catalytic subunit alpha isoform
P63330	PP2AA_MOUSE	Ppp2ca	Serine/threonine-protein phosphatase 2A catalytic subunit alpha isoform		0.346121	-0.0743734	17	17	1	70.6	70.6	4.2	35.608	0	323.31	3701000000	521	26.893	27.1053	27.181	27.0716	27.2529	26.7727	26.966	26.9164	27.205	27.1075	27.1874		P63330	PP2AA_MOUSE	Ppp2ca	Serine/threonine-protein phosphatase 2A catalytic subunit alpha isoform
P67778	PHB_MOUSE	Phb	Prohibitin		0.185292	0.0411826	29	29	29	87.1	87.1	87.1	29.82	0	323.31	7531100000	698	28.7674	28.7632	29.1178	28.8591	28.8999	28.8251	28.6566	28.9966	28.7784	28.6922	28.6847		P67778	PHB_MOUSE	Phb	Prohibitin
G3UXG7	G3UXG7_MOUSE	Csnk2b	Casein kinase II subunit beta		0.128147	-0.0671031	5	5	3	52.4	52.4	40.9	18.926	0	27.307	548080000	52	25.292	24.9961	25.0451	25.1227	24.7826	25.7272	25.0848	25.2022	25.3271	25.8576	25.1124		G3UXG7	G3UXG7_MOUSE	Csnk2b	Casein kinase II subunit beta
P67984	RL22_MOUSE	Rpl22	60S ribosomal protein L22		1.00846	-0.0762078	10	10	8	69.5	69.5	62.5	14.759	0	309.42	15569000000	758	28.4348	28.3779	28.4349	28.5514	28.5059	28.4255	28.3034	28.5533	28.4688	28.5257	28.4806		P67984	RL22_MOUSE	Rpl22	60S ribosomal protein L22
P68033	ACTC_MOUSE	Actc1	Actin, alpha cardiac muscle 1		1.28032	0.140079	47	23	0	93.6	66.8	0	42.019	0	323.31	199040000000	4074	31.6309	31.8317	31.5664	31.6526	31.4327	31.6721	31.5103	31.4563	31.5506	31.4127	31.556		P68033	ACTC_MOUSE	Actc1	Actin, alpha cardiac muscle 1
A0A338P786	A0A338P786_MOUSE	Ube2l3	Ubiquitin-conjugating enzyme E2 L3 (Fragment)		0.409608	0.0873493	8	8	8	67.1	67.1	67.1	16.821	0	127.32	5458000000	423	27.5298	27.4005	27.8213	27.4384	27.3588	27.3035	27.4551	27.2332	27.4484	27.2946	27.5138		A0A338P786	A0A338P786_MOUSE	Ube2l3	Ubiquitin-conjugating enzyme E2 L3 (Fragment)
P68040	RACK1_MOUSE	Rack1	Receptor of activated protein C kinase 1		0.160216	0.0210512	34	34	34	98.1	98.1	98.1	35.076	0	323.31	66537000000	3119	29.8857	29.7775	29.8736	29.7395	29.6622	29.8732	29.8908	29.8204	29.8564	29.9078	29.7267		P68040	RACK1_MOUSE	Rack1	Receptor of activated protein C kinase 1
P68134	ACTS_MOUSE	Acta1	Actin, alpha skeletal muscle		0	NaN	42	1	1	87.5	5.6	5.6	42.051	0	58.905	30738000	6	NaN	NaN	NaN	NaN	NaN	NaN	NaN	NaN	NaN	NaN	NaN		P68134	ACTS_MOUSE	Acta1	Actin, alpha skeletal muscle
P68181	KAPCB_MOUSE	Prkacb	cAMP-dependent protein kinase catalytic subunit beta		0.0336731	0.0118271	14	14	5	40.5	40.5	21.4	40.707	0	39.078	1921000000	223	26.79	27.1339	26.7538	27.0774	27.0487	27.1308	26.9778	26.7558	27.0168	27.4036	27.0026		P68181	KAPCB_MOUSE	Prkacb	cAMP-dependent protein kinase catalytic subunit beta
P68254	1433T_MOUSE	Ywhaq	14-3-3 protein theta		0.854463	0.124336	21	17	17	62.9	59.2	59.2	27.778	0	323.31	6335800000	669	26.8598	26.9453	26.7401	26.9384	26.712	26.6659	26.7744	26.7268	26.4697	26.6384	26.7242		P68254	1433T_MOUSE	Ywhaq	14-3-3 protein theta
P68368	TBA4A_MOUSE	Tuba4a	Tubulin alpha-4A chain		0.0894873	0.0227807	37	11	11	73.7	23.4	23.4	49.924	0	323.31	13791000000	887	28.1418	28.1679	28.1649	28.2249	27.8697	28.1537	27.7428	28.116	28.0007	28.1334	28.1468		P68368	TBA4A_MOUSE	Tuba4a	Tubulin alpha-4A chain
P68369	TBA1A_MOUSE	Tuba1a	Tubulin alpha-1A chain		0.438489	-0.385511	39	1	1	77.2	3.1	3.1	50.135	0	33.042	1335200000	90	27.5263	28.5368	27.4443	26.9109	28.4998	27.2148	27.4082	27.317	27.7845	27.2218	28.9817		P68369	TBA1A_MOUSE	Tuba1a	Tubulin alpha-1A chain
P68372	TBB4B_MOUSE	Tubb4b	Tubulin beta-4B chain		0.733071	0.0593503	44	44	6	86.5	86.5	17.3	49.83	0	323.31	169990000000	7171	32.3191	32.3111	32.3925	32.3416	32.2161	32.2478	32.2135	32.1687	32.2778	32.1719	32.2982		P68372	TBB4B_MOUSE	Tubb4b	Tubulin beta-4B chain
P68373	TBA1C_MOUSE	Tuba1c	Tubulin alpha-1C chain		0.29205	0.031606	40	40	5	78	78	15.8	49.909	0	323.31	109900000000	4932	31.9169	31.8497	31.8506	31.8542	31.7671	31.8173	31.8523	31.6473	31.8621	31.785	31.9007		P68373	TBA1C_MOUSE	Tuba1c	Tubulin alpha-1C chain
P68510	1433F_MOUSE	Ywhah	14-3-3 protein eta		1.24087	0.225281	22	20	19	67.9	63.8	63.8	28.211	0	323.31	4460100000	430	26.3316	26.3962	26.3274	26.2289	25.9811	26.342	26.3522	25.8742	26.0531	25.958	26.4264		P68510	1433F_MOUSE	Ywhah	14-3-3 protein eta
P69566	RANB9_MOUSE	Ranbp9	Ran-binding protein 9		1.51368	0.804157	4	3	3	10	7.4	7.4	71.011	0.0015232	5.4871	42877000	15	NaN	23.0025	NaN	23.3624	NaN	23.7919	NaN	22.7585	NaN	22.4592	22.5266		P69566	RANB9_MOUSE	Ranbp9	Ran-binding protein 9
P70122	SBDS_MOUSE	Sbds	Ribosome maturation protein SBDS		0.324474	0.116341	16	16	16	61.2	61.2	61.2	28.78	0	222.89	1106300000	169	24.2521	24.5847	24.3985	24.5111	24.2357	24.8156	24.8366	24.278	24.9167	24.6079	24.7872		P70122	SBDS_MOUSE	Sbds	Ribosome maturation protein SBDS
P70124	SPB5_MOUSE	Serpinb5	Serpin B5		2.24971	0.192525	23	23	23	64.3	64.3	64.3	42.111	0	323.31	9166100000	969	27.2173	27.4533	27.3493	27.4476	27.2982	27.4342	27.4001	27.0457	27.1604	27.2609	27.3637		P70124	SPB5_MOUSE	Serpinb5	Serpin B5
P70158	ASM3A_MOUSE	Smpdl3a	Acid sphingomyelinase-like phosphodiesterase 3a		0.456647	-0.236404	8	8	8	23.8	23.8	23.8	49.857	0	44.269	446880000	83	24.5619	24.7617	25.0498	24.7161	25.6368	24.0075	24.8029	24.7935	24.9244	24.5476	24.96		P70158	ASM3A_MOUSE	Smpdl3a	Acid sphingomyelinase-like phosphodiesterase 3a
P70168	IMB1_MOUSE	Kpnb1	Importin subunit beta-1		0.284325	0.0512738	40	40	40	59.1	59.1	59.1	97.183	0	280.07	5060600000	814	25.9406	26.2738	25.9401	26.0611	26.1282	25.9959	26.0754	25.9175	26.0012	25.9058	26.2145		P70168	IMB1_MOUSE	Kpnb1	Importin subunit beta-1
P70195	PSB7_MOUSE	Psmb7	Proteasome subunit beta type-7		0.0897161	0.0455512	10	10	10	35.7	35.7	35.7	29.891	0	190.26	2414800000	154	28.5006	28.1494	28.6632	28.4069	28.2137	29.0637	28.5371	28.4862	28.5209	29.0472	28.3425		P70195	PSB7_MOUSE	Psmb7	Proteasome subunit beta type-7
P70196	TRAF6_MOUSE	Traf6	TNF receptor-associated factor 6		0.00979055	0.00839221	4	4	4	10.9	10.9	10.9	60.069	0	33.521	167400000	50	24.5063	23.9996	24.8238	25.0919	25.7415	25.0611	24.6896	24.323	24.6336	24.6504	24.4938		P70196	TRAF6_MOUSE	Traf6	TNF receptor-associated factor 6
P70202	LXN_MOUSE	Lxn	Latexin		0.240828	0.0463564	5	5	5	25.7	25.7	25.7	25.492	0	190.58	1216600000	125	25.5748	25.5974	25.7931	25.9188	25.5705	25.7921	25.5526	25.6815	25.8248	25.8122	25.6431		P70202	LXN_MOUSE	Lxn	Latexin
P70227	ITPR3_MOUSE	Itpr3	Inositol 1,4,5-trisphosphate receptor type 3		0.408842	-0.0451499	35	35	32	16.5	16.5	15.5	304.27	0	102.31	778390000	231	25.1538	25.0434	25.1846	24.9478	25.06	25.0007	25.1229	25.1264	25.1724	25.1359	24.9819		P70227	ITPR3_MOUSE	Itpr3	Inositol 1,4,5-trisphosphate receptor type 3
P70245	EBP_MOUSE	Ebp	3-beta-hydroxysteroid-Delta(8),Delta(7)-isomerase		0.308617	-0.15875	3	3	3	15.2	15.2	15.2	26.215	0	167.46	1488300000	94	28.2887	28.3577	28.6776	27.6413	28.5048	28.7724	28.6178	28.6555	28.9624	28.7459	28.2755		P70245	EBP_MOUSE	Ebp	3-beta-hydroxysteroid-Delta(8),Delta(7)-isomerase
P70268	PKN1_MOUSE	Pkn1	Serine/threonine-protein kinase N1		0.898368	0.174002	13	13	12	14.2	14.2	13.3	104.41	0	13.726	410620000	60	25.336	25.3699	25.5726	25.449	25.0508	25.4866	25.3396	25.2561	25.016	25.5854	25.3729		P70268	PKN1_MOUSE	Pkn1	Serine/threonine-protein kinase N1
P70271	PDLI4_MOUSE	Pdlim4	PDZ and LIM domain protein 4		1.6828	0.510506	14	14	14	61.2	61.2	61.2	35.556	0	52.376	432160000	96	23.0918	24.2937	24.3188	24.1989	23.7917	24.4516	23.8615	23.8207	23.8373	24.1455	23.5993		P70271	PDLI4_MOUSE	Pdlim4	PDZ and LIM domain protein 4
P70274	SEPP1_MOUSE	Selenop	Selenoprotein P		0.503238	-0.307362	3	3	3	11.3	11.3	11.3	42.705	0	30.217	324140000	38	27.0342	26.0758	26.387	26.214	25.6383	NaN	26.2758	26.8433	26.6364	26.1357	26.9852		P70274	SEPP1_MOUSE	Selenop	Selenoprotein P
P70277	SIA7B_MOUSE	St6galnac2	Alpha-N-acetylgalactosaminide alpha-2,6-sialyltransferase 2		0.750042	-0.210787	14	14	14	42.6	42.6	42.6	42.481	0	44.036	885100000	149	25.2527	25.3716	25.6414	25.2825	25.7643	25.55	25.5338	25.9969	25.4833	25.9885	25.6342		P70277	SIA7B_MOUSE	St6galnac2	Alpha-N-acetylgalactosaminide alpha-2,6-sialyltransferase 2
P70280	VAMP7_MOUSE	Vamp7	Vesicle-associated membrane protein 7		0.0163251	-0.00911808	3	3	3	17.3	17.3	17.3	24.967	0.0014925	5.0783	65967000	21	NaN	23.3629	NaN	23.403	23.2186	NaN	NaN	NaN	NaN	NaN	23.5656		P70280	VAMP7_MOUSE	Vamp7	Vesicle-associated membrane protein 7
A2AN84	A2AN84_MOUSE	Mpp1	55 kDa erythrocyte membrane protein		0.548509	-0.12391	11	11	11	29.4	29.4	29.4	50.535	0	39.569	567880000	123	24.0474	24.2752	24.4369	24.2386	24.5982	24.2439	24.2092	24.5494	24.262	24.6209	24.3502		A2AN84	A2AN84_MOUSE	Mpp1	55 kDa erythrocyte membrane protein
A0A0N4SVA6	A0A0N4SVA6_MOUSE	Aup1	Lipid droplet-regulating VLDL assembly factor AUP1 (Fragment)		1.5719	0.346096	6	6	6	28.1	28.1	28.1	43.725	0	49.28	151050000	45	24.2032	24.2256	24.1897	24.1774	23.8609	24.5424	24.3233	23.6395	23.8341	24.3126	23.8231		A0A0N4SVA6	A0A0N4SVA6_MOUSE	Aup1	Lipid droplet-regulating VLDL assembly factor AUP1 (Fragment)
P70296	PEBP1_MOUSE	Pebp1	Phosphatidylethanolamine-binding protein 1		0.35277	0.0737988	15	15	15	95.7	95.7	95.7	20.83	0	323.31	12231000000	965	28.5108	28.6282	28.8049	28.4948	28.6891	28.9652	28.5051	28.4954	28.6088	28.7311	28.5999		P70296	PEBP1_MOUSE	Pebp1	Phosphatidylethanolamine-binding protein 1
P70297	STAM1_MOUSE	Stam	Signal transducing adapter molecule 1		0	0.326561	6	4	4	13.1	9.7	9.7	59.771	0	16.951	111220000	27	22.7249	NaN	NaN	22.925	22.7736	NaN	NaN	22.326	NaN	NaN	22.5692		P70297	STAM1_MOUSE	Stam	Signal transducing adapter molecule 1
A0A1B0GR78	A0A1B0GR78_MOUSE	Stim1	Stromal interaction molecule 1		0.0984906	-0.0489697	6	5	5	16.7	13.7	13.7	62.195	0.00052274	6.2365	105810000	16	NaN	NaN	24.9777	NaN	24.9216	NaN	24.8348	24.6432	25.1508	NaN	25.1051		A0A1B0GR78	A0A1B0GR78_MOUSE	Stim1	Stromal interaction molecule 1
P70303	PYRG2_MOUSE	Ctps2	CTP synthase 2		0.853818	-0.132152	14	14	13	31.9	31.9	29.9	65.514	0	31.917	519970000	120	24.4473	24.4794	24.2931	24.3906	24.5857	24.0455	24.3245	24.5019	24.4492	24.269	24.3795		P70303	PYRG2_MOUSE	Ctps2	CTP synthase 2
P70315	WASP_MOUSE	Was	Wiskott-Aldrich syndrome protein homolog		0	NaN	1	1	1	2.9	2.9	2.9	54.191	0.0019166	4.3421	10872000	5	NaN	NaN	NaN	NaN	NaN	NaN	NaN	NaN	NaN	NaN	NaN		P70315	WASP_MOUSE	Was	Wiskott-Aldrich syndrome protein homolog
P70333	HNRH2_MOUSE	Hnrnph2	Heterogeneous nuclear ribonucleoprotein H2		0.0716676	-0.0424594	10	5	5	35.9	19.2	19.2	49.279	0	62.912	580690000	96	24.8988	24.2821	24.7908	24.3487	24.3951	24.3909	25.2636	24.7898	24.8449	24.1713	24.8462		P70333	HNRH2_MOUSE	Hnrnph2	Heterogeneous nuclear ribonucleoprotein H2
P70335	ROCK1_MOUSE	Rock1	Rho-associated protein kinase 1		0.598483	0.112736	15	11	11	13.9	10.4	10.4	158.17	0	29.266	153080000	30	24.3677	24.4717	24.1451	24.4397	24.1694	24.1832	24.4954	24.3458	24.1095	NaN	24.1792		P70335	ROCK1_MOUSE	Rock1	Rho-associated protein kinase 1
A2AR78	A2AR78_MOUSE	Tank	TRAF family member-associated NF-kappa-B activator		0	NaN	2	2	2	7.5	7.5	7.5	40.906	0.0041686	3.7981	9693500	7	NaN	NaN	NaN	NaN	NaN	NaN	NaN	NaN	NaN	NaN	NaN		A2AR78	A2AR78_MOUSE	Tank	TRAF family member-associated NF-kappa-B activator
P70349	HINT1_MOUSE	Hint1	Histidine triad nucleotide-binding protein 1		0.380083	0.121803	10	10	10	78.6	78.6	78.6	13.777	0	304.17	14683000000	645	29.1567	29.0525	29.099	29.299	29.2262	29.4788	29.0704	29.1131	28.546	29.3067	29.12		P70349	HINT1_MOUSE	Hint1	Histidine triad nucleotide-binding protein 1
P70362	UFD1_MOUSE	Ufd1	Ubiquitin recognition factor in ER-associated degradation protein 1		0.311532	0.0565158	9	9	9	31.6	31.6	31.6	34.481	0	28.594	1200200000	189	25.5568	25.4609	25.6306	25.6076	25.3494	25.8217	25.601	25.6787	25.684	25.6393	25.4989		P70362	UFD1_MOUSE	Ufd1	Ubiquitin recognition factor in ER-associated degradation protein 1
P70372	ELAV1_MOUSE	Elavl1	ELAV-like protein 1		0.701843	-0.309078	16	16	16	56.7	56.7	56.7	36.169	0	172.96	3003400000	361	25.9236	25.4685	25.496	25.2946	25.3087	25.953	26.1583	26.0349	26.2686	26.3636	25.9995		P70372	ELAV1_MOUSE	Elavl1	ELAV-like protein 1
A0A0R4J0S2	A0A0R4J0S2_MOUSE	Igfals	Insulin-like growth factor-binding protein complex acid labile subunit		0.171546	-0.0663041	21	21	21	41.1	41.1	41.1	66.989	0	149.72	2470700000	384	26.7967	26.6022	26.7506	27.0324	27.3314	27.2062	27.0046	27.2063	26.6418	27.0567	26.8801		A0A0R4J0S2	A0A0R4J0S2_MOUSE	Igfals	Insulin-like growth factor-binding protein complex acid labile subunit
Q4FE56	Q4FE56_MOUSE	Usp9x	Ubiquitinyl hydrolase 1		0.100063	-0.0107015	70	70	70	34.6	34.6	34.6	290.21	0	296.21	3438500000	632	26.5445	26.6134	26.6861	26.5089	26.6186	26.5355	26.6656	26.5777	26.627	26.7044	26.6034		Q4FE56	Q4FE56_MOUSE	Usp9x	Ubiquitinyl hydrolase 1
A2AU90	A2AU90_MOUSE	Trp53bp1	Transformation-related protein 53-binding protein 1 (Fragment)		0	NaN	2	2	2	4.7	4.7	4.7	109.62	0.0052225	3.5357	133690000	20	NaN	NaN	25.1121	25.3966	NaN	23.8204	NaN	NaN	NaN	NaN	NaN		A2AU90	A2AU90_MOUSE	Trp53bp1	Transformation-related protein 53-binding protein 1 (Fragment)
H3BKT0	H3BKT0_MOUSE	Cux1	Protein CASP		0	NaN	3	3	1	4.1	4.1	1.2	77.161	0.0089189	2.9809	11880000	6	NaN	NaN	NaN	NaN	NaN	NaN	NaN	NaN	NaN	NaN	NaN		H3BKT0	H3BKT0_MOUSE	Cux1	Protein CASP
P70404	IDHG1_MOUSE	Idh3g	Isocitrate dehydrogenase [NAD] subunit gamma 1, mitochondrial		0.452372	-0.111768	14	14	14	46.3	46.3	46.3	42.785	0	323.31	2029700000	283	25.8684	25.7093	25.83	26.0766	26.0355	26.2016	25.5826	26.0591	26.0757	26.0702	25.8418		P70404	IDHG1_MOUSE	Idh3g	Isocitrate dehydrogenase [NAD] subunit gamma 1, mitochondrial
P70419	GALT3_MOUSE	Galnt3	Polypeptide N-acetylgalactosaminyltransferase 3		0.0243316	-0.00744267	12	12	12	20.2	20.2	20.2	72.931	0	25.006	503070000	90	25.4734	25.437	25.5208	25.6063	25.6147	25.4839	25.5975	25.3451	25.8537	25.2461	25.6863		P70419	GALT3_MOUSE	Galnt3	Polypeptide N-acetylgalactosaminyltransferase 3
D3Z4U9	D3Z4U9_MOUSE	Irf7	Interferon regulatory factor 7		0	NaN	3	3	3	8	8	8	48.028	0.0041638	3.7927	4315100	3	NaN	NaN	NaN	NaN	NaN	NaN	NaN	NaN	NaN	NaN	NaN		D3Z4U9	D3Z4U9_MOUSE	Irf7	Interferon regulatory factor 7
P70441	NHRF1_MOUSE	Slc9a3r1	Na(+)/H(+) exchange regulatory cofactor NHE-RF1		0.144358	0.0310332	25	25	25	78.9	78.9	78.9	38.6	0	323.31	10265000000	651	26.8416	26.7628	26.9115	26.7033	26.5462	26.5572	26.6757	26.884	26.5873	26.6978	26.5896		P70441	NHRF1_MOUSE	Slc9a3r1	Na(+)/H(+) exchange regulatory cofactor NHE-RF1
P70445	4EBP2_MOUSE	Eif4ebp2	Eukaryotic translation initiation factor 4E-binding protein 2		0.600644	0.145402	3	3	3	36.7	36.7	36.7	12.898	0	24.561	203600000	32	23.1442	22.9803	23.5852	23.1855	23.0394	23.0334	22.9149	22.8763	23.0541	22.8743	22.9784		P70445	4EBP2_MOUSE	Eif4ebp2	Eukaryotic translation initiation factor 4E-binding protein 2
P70452	STX4_MOUSE	Stx4	Syntaxin-4		0	NaN	2	2	2	10.1	10.1	10.1	34.165	0	28.906	31042000	12	NaN	NaN	NaN	NaN	NaN	NaN	NaN	NaN	NaN	NaN	NaN		P70452	STX4_MOUSE	Stx4	Syntaxin-4
P70460	VASP_MOUSE	Vasp	Vasodilator-stimulated phosphoprotein		0.271399	0.0884515	16	16	16	45.3	45.3	45.3	39.666	0	114.34	1024000000	153	25.2414	25.188	25.1863	25.1125	25.0577	25.3956	25.6518	24.8515	25.3314	25.5103	25.3181		P70460	VASP_MOUSE	Vasp	Vasodilator-stimulated phosphoprotein
Q60817	NACA_MOUSE	Naca	Nascent polypeptide-associated complex subunit alpha		0.38726	-0.0480092	8	8	8	34.4	34.4	34.4	23.384	0	323.31	8343200000	439	28.1493	28.1665	28.0957	28.0268	27.9679	27.9759	28.1155	28.1332	28.1304	28.2852	28.0786		Q60817	NACA_MOUSE	Naca	Nascent polypeptide-associated complex subunit alpha
P70671	IRF3_MOUSE	Irf3	Interferon regulatory factor 3		0.98517	0.197148	11	11	11	36.3	36.3	36.3	46.852	0	60.54	562730000	117	23.9983	24.4742	24.2762	24.1947	23.8678	24.1307	24.1305	24.2234	23.7623	24.2811	24.1316		P70671	IRF3_MOUSE	Irf3	Interferon regulatory factor 3
P70677	CASP3_MOUSE	Casp3	Caspase-3		1.23739	-0.14447	19	19	19	69.3	69.3	69.3	31.474	0	149.99	2411200000	358	27.5772	27.4767	27.4974	27.3473	27.7902	27.3551	27.5272	27.5874	27.6473	27.4401	27.469		P70677	CASP3_MOUSE	Casp3	Caspase-3
P70695	F16P2_MOUSE	Fbp2	Fructose-1,6-bisphosphatase isozyme 2		0	NaN	2	2	2	10.9	10.9	10.9	36.947	0.0002858	8.9816	7646300	3	NaN	NaN	NaN	NaN	NaN	NaN	NaN	NaN	NaN	NaN	NaN		P70695	F16P2_MOUSE	Fbp2	Fructose-1,6-bisphosphatase isozyme 2
P70697	DCUP_MOUSE	Urod	Uroporphyrinogen decarboxylase		0.308455	-0.0812407	13	13	13	51	51	51	40.691	0	112.22	557040000	89	25.566	25.7775	25.7491	25.7441	25.8142	25.3652	25.3535	25.8919	25.7	25.4639	25.6387		P70697	DCUP_MOUSE	Urod	Uroporphyrinogen decarboxylase
P70698	PYRG1_MOUSE	Ctps1	CTP synthase 1		1.10599	0.262362	10	9	9	22.8	22.8	22.8	66.682	0	44.674	149840000	48	24.1719	24.5126	24.4812	24.0951	23.7667	24.2458	24.4978	24.0019	24.2987	NaN	24.2814		P70698	PYRG1_MOUSE	Ctps1	CTP synthase 1
P70699	LYAG_MOUSE	Gaa	Lysosomal alpha-glucosidase		0.0316688	-0.0113393	11	11	11	14.9	14.9	14.9	106.25	0	34.115	364100000	65	24.2613	24.4413	24.2569	24.2142	24.3196	24.3618	24.4704	24.4855	24.567	23.9142	24.6138		P70699	LYAG_MOUSE	Gaa	Lysosomal alpha-glucosidase
P80313	TCPH_MOUSE	Cct7	T-complex protein 1 subunit eta		1.22358	0.110151	29	29	29	63.4	63.4	63.4	59.652	0	259.16	7345000000	844	26.3001	26.4274	26.4139	26.3222	26.2687	26.2446	26.3529	26.1378	26.1898	26.1728	26.383		P80313	TCPH_MOUSE	Cct7	T-complex protein 1 subunit eta
P80314	TCPB_MOUSE	Cct2	T-complex protein 1 subunit beta		0.386666	0.0511267	40	40	40	77.6	77.6	77.6	57.477	0	323.31	15302000000	1661	27.6301	27.8596	27.7956	27.7488	27.6162	27.556	27.5937	27.6561	27.7781	27.642	27.6353		P80314	TCPB_MOUSE	Cct2	T-complex protein 1 subunit beta
P80315	TCPD_MOUSE	Cct4	T-complex protein 1 subunit delta		0.011434	0.00199356	35	35	35	68.8	68.8	68.8	58.066	0	323.31	9806400000	1061	27.2122	27.4682	27.3648	27.4683	27.3717	27.2064	27.2283	27.3689	27.3863	27.3356	27.3966		P80315	TCPD_MOUSE	Cct4	T-complex protein 1 subunit delta
P80316	TCPE_MOUSE	Cct5	T-complex protein 1 subunit epsilon		1.00051	0.0591078	42	42	42	76.5	76.5	76.5	59.623	0	323.31	12870000000	1361	27.4891	27.6678	27.6582	27.6352	27.5915	27.6553	27.5838	27.5864	27.5233	27.6565	27.639		P80316	TCPE_MOUSE	Cct5	T-complex protein 1 subunit epsilon
P80317	TCPZ_MOUSE	Cct6a	T-complex protein 1 subunit zeta		2.41917	0.153517	33	33	33	63.3	63.3	63.3	58.004	0	323.31	8663300000	1153	26.1541	26.2262	26.2241	26.3063	25.9533	26.3128	26.1976	26.132	26.0948	26.1289	26.1362		P80317	TCPZ_MOUSE	Cct6a	T-complex protein 1 subunit zeta
P80318	TCPG_MOUSE	Cct3	T-complex protein 1 subunit gamma		1.17124	0.119696	37	37	37	65	65	65	60.629	0	323.31	12532000000	1130	27.1437	27.1966	27.3713	27.3173	27.0928	27.2626	27.0709	26.988	27.173	27.1822	27.1643		P80318	TCPG_MOUSE	Cct3	T-complex protein 1 subunit gamma
P81117	NUCB2_MOUSE	Nucb2	Nucleobindin-2		0.750362	0.0812983	35	35	35	69.3	69.3	69.3	50.304	0	323.31	29674000000	2090	28.9121	28.9792	29.0061	28.9312	28.8822	28.8351	28.8037	28.8538	28.6468	28.824	28.8596		P81117	NUCB2_MOUSE	Nucb2	Nucleobindin-2
P81122	IRS2_MOUSE	Irs2	Insulin receptor substrate 2		0	NaN	2	2	2	2.1	2.1	2.1	136.76	0.003971	3.9292	47358000	9	NaN	NaN	NaN	NaN	NaN	NaN	NaN	NaN	NaN	NaN	NaN		P81122	IRS2_MOUSE	Irs2	Insulin receptor substrate 2
P82198	BGH3_MOUSE	Tgfbi	Transforming growth factor-beta-induced protein ig-h3		0.269612	-0.151773	9	9	9	19.6	19.6	19.6	74.596	0	17.471	489880000	66	25.0792	25.7159	25.2181	25.5116	26.0742	25.3277	25.9322	25.2063	25.9864	25.6749	26.1362		P82198	BGH3_MOUSE	Tgfbi	Transforming growth factor-beta-induced protein ig-h3
P82343	RENBP_MOUSE	Renbp	N-acylglucosamine 2-epimerase		1.14712	0.24625	9	9	9	30.7	30.7	30.7	49.771	0	51.795	525770000	96	23.9232	24.27	24.1541	24.345	24.0315	23.9442	23.8874	23.8772	23.5539	23.7538	24.1037		P82343	RENBP_MOUSE	Renbp	N-acylglucosamine 2-epimerase
P83093	STIM2_MOUSE	Stim2	Stromal interaction molecule 2		0.118075	-0.0452723	24	24	23	40.8	40.8	38.6	83.924	0	78.122	942140000	166	25.2093	25.1503	25.4177	25.026	25.0699	25.1927	25.0685	25.1722	25.7883	25.0605	24.9977		P83093	STIM2_MOUSE	Stim2	Stromal interaction molecule 2
E0CZF8	E0CZF8_MOUSE	Tnik	Traf2 and NCK-interacting protein kinase		0.355233	0.243293	11	11	3	9	9	3.2	144.25	0	15.73	6281000000	39	31.088	31.063	31.3388	31.1927	30.285	31.8128	31.4701	31.1948	31.2938	32.1494	30.7821		E0CZF8	E0CZF8_MOUSE	Tnik	Traf2 and NCK-interacting protein kinase
P83741	WNK1_MOUSE	Wnk1	Serine/threonine-protein kinase WNK1		0.483734	0.109796	14	14	11	6.6	6.6	5.6	250.93	0	21.892	165700000	50	22.2562	22.0884	22.2663	22.15	21.9445	22.5478	22.4184	22.2328	22.3015	NaN	22.1869		P83741	WNK1_MOUSE	Wnk1	Serine/threonine-protein kinase WNK1
P83870	PHF5A_MOUSE	Phf5a	PHD finger-like domain-containing protein 5A		0.174611	0.0805616	3	3	3	20.9	20.9	20.9	12.405	0	104.28	97282000	32	22.1752	22.1917	NaN	22.32	22.0391	22.4176	22.3366	21.8715	22.7771	22.5361	22.0163		P83870	PHF5A_MOUSE	Phf5a	PHD finger-like domain-containing protein 5A
P83882	RL36A_MOUSE	Rpl36a	60S ribosomal protein L36a		0.605813	-0.681361	5	5	5	28.3	28.3	28.3	12.441	0	74.764	2017800000	157	26.8794	23.8857	27.0009	26.5711	26.795	27.1035	26.4578	27.0086	26.4487	27.3609	26.8184		P83882	RL36A_MOUSE	Rpl36a	60S ribosomal protein L36a
Q8VCK3	TBG2_MOUSE	Tubg2	Tubulin gamma-2 chain		0.495174	0.169774	3	3	3	8	8	8	51.121	0.0005463	7.5057	109600000	26	21.4666	22.1325	22.1801	22.3609	22.2959	22.2505	21.8483	21.9371	22.0845	22.2876	21.8363		Q8VCK3	TBG2_MOUSE	Tubg2	Tubulin gamma-2 chain
P83917	CBX1_MOUSE	Cbx1	Chromobox protein homolog 1		0.0931482	0.0276658	5	4	4	30.8	22.2	22.2	21.418	0	17.76	379270000	58	23.2121	23.2959	22.9291	23.1579	22.9516	23.2671	23.1955	23.2412	23.4358	22.8677	23.1401		P83917	CBX1_MOUSE	Cbx1	Chromobox protein homolog 1
A0A087WQE6	A0A087WQE6_MOUSE	Eloc	Elongin-C (Fragment)		0.72869	0.0962984	7	7	7	77.9	77.9	77.9	10.657	0	244.21	870950000	105	24.5424	24.4456	24.6225	24.7526	24.4735	24.6656	24.441	24.4324	24.6063	24.3678	24.5127		A0A087WQE6	A0A087WQE6_MOUSE	Eloc	Elongin-C (Fragment)
P84078	ARF1_MOUSE	Arf1	ADP-ribosylation factor 1		0.305873	0.0849387	21	21	2	90.1	90.1	16	20.697	0	323.31	31590000000	2485	29.5379	29.3971	29.5768	29.4725	29.3266	29.0167	29.2657	29.1448	29.1756	29.0309	29.3491		P84078	ARF1_MOUSE	Arf1	ADP-ribosylation factor 1
P84084	ARF5_MOUSE	Arf5	ADP-ribosylation factor 5		0.570746	0.184997	16	7	7	88.3	43.9	43.9	20.529	0	92.753	654740000	183	24.6949	25.2791	24.732	24.7031	24.9024	24.6239	24.5533	24.3948	24.3745	24.3986	24.7943		P84084	ARF5_MOUSE	Arf5	ADP-ribosylation factor 5
P84089	ERH_MOUSE	Erh	Enhancer of rudimentary homolog		0.0224426	-0.0175674	4	4	4	38.5	38.5	38.5	12.259	0	78.48	427930000	92	25.6336	25.5399	25.5631	24.9721	25.3629	26.3941	25.7093	25.5744	25.9461	26.2395	25.1632		P84089	ERH_MOUSE	Erh	Enhancer of rudimentary homolog
P84091	AP2M1_MOUSE	Ap2m1	AP-2 complex subunit mu		0.304495	0.0437664	26	26	26	61.8	61.8	61.8	49.654	0	323.31	4819400000	430	26.6849	26.645	26.8938	26.7836	26.7512	26.8637	26.9679	26.8832	26.8424	26.8461	26.7142		P84091	AP2M1_MOUSE	Ap2m1	AP-2 complex subunit mu
P84096	RHOG_MOUSE	Rhog	Rho-related GTP-binding protein RhoG		0.0690819	0.025029	9	8	8	63.4	57.6	57.6	21.308	0	26.568	247130000	47	22.6305	22.5428	NaN	23.0343	23.0124	22.9269	23.1476	22.8254	23.0647	22.8521	22.9422		P84096	RHOG_MOUSE	Rhog	Rho-related GTP-binding protein RhoG
A2A547	A2A547_MOUSE	Rpl19	Ribosomal protein L19		0.522337	-0.0707013	12	12	12	37.1	37.1	37.1	23.247	0	323.31	12652000000	906	27.2757	27.2443	27.1504	27.1157	27.0807	27.3277	27.2439	27.4085	27.4076	27.2964	27.2536		A2A547	A2A547_MOUSE	Rpl19	Ribosomal protein L19
P84104	SRSF3_MOUSE	Srsf3	Serine/arginine-rich splicing factor 3		0.258399	-0.102406	7	7	6	40.9	40.9	40.9	19.329	0	60.881	1733200000	189	26.1428	25.9636	25.9619	25.8636	25.6141	25.8971	26.4413	26.1021	26.0933	26.2919	26.5235		P84104	SRSF3_MOUSE	Srsf3	Serine/arginine-rich splicing factor 3
P84228	H32_MOUSE	H3c2	Histone H3.2		0	0.41113	9	1	1	55.9	23.5	23.5	15.388	0	22.778	42502000	41	NaN	23.8331	NaN	NaN	NaN	NaN	NaN	NaN	23.6313	NaN	23.2125		P84228	H32_MOUSE	H3c2	Histone H3.2
P85094	ISC2A_MOUSE	Isoc2a	Isochorismatase domain-containing protein 2A		1.34852	-0.258009	6	6	6	65.5	65.5	65.5	22.417	0	127.89	801790000	177	27.4229	27.0787	27.0849	27.0307	27.1784	26.9426	27.1884	27.6239	27.2208	26.9956	27.4966		P85094	ISC2A_MOUSE	Isoc2a	Isochorismatase domain-containing protein 2A
P97290	IC1_MOUSE	Serping1	Plasma protease C1 inhibitor		0.716085	-0.159068	14	14	14	35.5	35.5	35.5	55.584	0	166	1549700000	194	26.8149	26.7269	26.5253	26.9318	26.6266	26.5344	26.7568	27.1016	26.7633	26.7244	27.0939		P97290	IC1_MOUSE	Serping1	Plasma protease C1 inhibitor
P97298	PEDF_MOUSE	Serpinf1	Pigment epithelium-derived factor		0.737678	-0.169088	12	12	12	42.4	42.4	42.4	46.233	0	125.54	684650000	126	25.5561	25.1961	24.98	25.4199	25.356	25.5514	25.4751	25.4306	25.7385	25.3258	25.5547		P97298	PEDF_MOUSE	Serpinf1	Pigment epithelium-derived factor
H3BIX4	H3BIX4_MOUSE	Nptn	Neuroplastin (Fragment)		0.360201	-0.0895795	3	3	3	18.1	18.1	18.1	24.293	0	18.23	783070000	98	25.1694	25.1734	25.0777	25.1856	24.885	24.8057	25.029	25.1255	25.1777	25.4868	25.0187		H3BIX4	H3BIX4_MOUSE	Nptn	Neuroplastin (Fragment)
P97310	MCM2_MOUSE	Mcm2	DNA replication licensing factor MCM2		0	NaN	2	2	2	2.7	2.7	2.7	102.08	0.0088918	2.9483	19996000	8	NaN	NaN	NaN	NaN	NaN	NaN	NaN	NaN	NaN	NaN	NaN		P97310	MCM2_MOUSE	Mcm2	DNA replication licensing factor MCM2
Q3ULG5	Q3ULG5_MOUSE	Mcm6	DNA helicase		0	NaN	3	3	3	4.7	4.7	4.7	89.783	0.0016859	4.415	9831900	4	NaN	NaN	NaN	NaN	NaN	NaN	NaN	NaN	NaN	NaN	NaN		Q3ULG5	Q3ULG5_MOUSE	Mcm6	DNA helicase
P97315	CSRP1_MOUSE	Csrp1	Cysteine and glycine-rich protein 1		1.01937	0.150878	13	13	13	64.8	64.8	64.8	20.583	0	323.31	14568000000	864	27.2853	27.5068	27.3348	27.2602	27.1872	27.606	27.6154	27.2602	27.3619	27.5018	27.286		P97315	CSRP1_MOUSE	Csrp1	Cysteine and glycine-rich protein 1
P97346	NXN_MOUSE	Nxn	Nucleoredoxin		0	NaN	2	2	2	9.2	9.2	9.2	48.343	0	20.782	71724000	12	NaN	NaN	NaN	NaN	NaN	NaN	NaN	NaN	NaN	NaN	NaN		P97346	NXN_MOUSE	Nxn	Nucleoredoxin
P97351	RS3A_MOUSE	Rps3a	40S ribosomal protein S3a		0.251608	0.0663645	29	29	29	66.3	66.3	66.3	29.885	0	323.31	64872000000	2226	29.9407	29.6284	29.796	29.5573	29.326	29.9088	29.6965	29.7628	29.5303	29.697	29.6494		P97351	RS3A_MOUSE	Rps3a	40S ribosomal protein S3a
P97352	S10AD_MOUSE	S100a13	Protein S100-A13		0.128227	0.0788871	7	7	7	66.3	66.3	66.3	11.158	0	23.465	1059000000	91	24.747	25.2527	25.8597	24.9537	25.2738	24.9671	24.7342	24.5658	25.4112	25.3414	25.1082		P97352	S10AD_MOUSE	S100a13	Protein S100-A13
P97363	SPTC2_MOUSE	Sptlc2	Serine palmitoyltransferase 2		0.849995	0.229014	13	13	13	29.5	29.5	29.5	62.981	0	33.622	243530000	76	22.8735	23.0269	22.9934	23.1918	22.7264	22.9521	23.3176	22.4537	23.3127	22.8639	22.9737		P97363	SPTC2_MOUSE	Sptlc2	Serine palmitoyltransferase 2
P97364	SPS2_MOUSE	Sephs2	Selenide, water dikinase 2		0.00140642	0.000438817	7	7	7	26.5	26.5	26.5	47.833	0	82.252	1856800000	137	26.6503	26.3372	26.6248	26.933	26.4248	26.4557	26.4951	26.6779	26.4255	26.6267	26.6071		P97364	SPS2_MOUSE	Sephs2	Selenide, water dikinase 2
P97370	AT1B3_MOUSE	Atp1b3	Sodium/potassium-transporting ATPase subunit beta-3		0.509275	0.122816	11	11	11	47.8	47.8	47.8	31.775	0	118.66	1479100000	201	26.698	26.6461	26.7482	26.4277	26.3297	26.7052	26.8854	26.7576	26.4015	26.772	26.3993		P97370	AT1B3_MOUSE	Atp1b3	Sodium/potassium-transporting ATPase subunit beta-3
G3UXZ5	G3UXZ5_MOUSE	Psme1	Proteasome activator complex subunit 1 (Fragment)		0.247298	-0.0734305	21	21	20	82.4	82.4	77.7	27.411	0	323.31	8347100000	809	28.3775	28.1234	28.3138	28.1027	28.0358	28.0262	28.6692	28.4082	28.4317	28.3236	28.3461		G3UXZ5	G3UXZ5_MOUSE	Psme1	Proteasome activator complex subunit 1 (Fragment)
P97372	PSME2_MOUSE	Psme2	Proteasome activator complex subunit 2		0.0478218	0.0121806	17	16	16	70.3	65.7	65.7	27.057	0	279.58	4369300000	404	27.5803	27.5066	27.6983	27.6604	27.6495	27.5497	27.9414	27.7761	27.6521	27.4689	27.8278		P97372	PSME2_MOUSE	Psme2	Proteasome activator complex subunit 2
P97376	FRG1_MOUSE	Frg1	Protein FRG1		0	NaN	2	2	2	9.3	9.3	9.3	29.127	0.0060552	3.3799	9269700	4	NaN	NaN	NaN	NaN	NaN	NaN	NaN	NaN	NaN	NaN	NaN		P97376	FRG1_MOUSE	Frg1	Protein FRG1
P97377	CDK2_MOUSE	Cdk2	Cyclin-dependent kinase 2		0.374579	0.193944	6	5	5	22.8	20.5	20.5	38.978	0.00054585	7.4676	71522000	20	NaN	23.5603	NaN	23.5665	23.0867	NaN	NaN	23.3741	NaN	NaN	23.6477		P97377	CDK2_MOUSE	Cdk2	Cyclin-dependent kinase 2
P97379	G3BP2_MOUSE	G3bp2	Ras GTPase-activating protein-binding protein 2		0.453471	0.0908379	16	15	15	39.2	36.7	36.7	54.087	0	231.35	2235800000	231	25.4719	25.4574	25.3973	25.2903	25.042	25.3934	25.5942	25.4027	25.411	25.1923	25.4943		P97379	G3BP2_MOUSE	G3bp2	Ras GTPase-activating protein-binding protein 2
P97384	ANX11_MOUSE	Anxa11	Annexin A11		0.988146	0.149475	18	17	17	40	38.6	38.6	54.079	0	110.21	1896400000	301	24.4173	24.7477	24.4558	24.5407	24.4171	24.3842	24.757	24.2388	24.5133	24.4717	24.5075		P97384	ANX11_MOUSE	Anxa11	Annexin A11
B1AT03	B1AT03_MOUSE	Lig3	DNA ligase		1.2824	0.855837	3	3	3	3.9	3.9	3.9	106.14	0.0045756	3.6319	338740000	16	24.1336	NaN	NaN	24.7514	NaN	24.8643	NaN	NaN	NaN	24.1882	23.5342		B1AT03	B1AT03_MOUSE	Lig3	DNA ligase
P97390	VPS45_MOUSE	Vps45	Vacuolar protein sorting-associated protein 45		0.519582	0.0972795	21	21	21	40.4	40.4	40.4	65.052	0	91.728	1799700000	246	25.7462	26.0323	26.2312	26.1561	26.2439	26.0432	26.0368	26.0007	25.8575	26.0406	26.1268		P97390	VPS45_MOUSE	Vps45	Vacuolar protein sorting-associated protein 45
D3Z118	D3Z118_MOUSE	Ica1	Islet cell autoantigen 1		0.105953	0.0561757	6	6	6	13.8	13.8	13.8	52.93	0.0005499	7.6683	72420000	30	NaN	23.328	23.4961	23.1429	23.4021	23.4626	23.5568	NaN	23.6047	23.6074	22.7503		D3Z118	D3Z118_MOUSE	Ica1	Islet cell autoantigen 1
P97429	ANXA4_MOUSE	Anxa4	Annexin A4		0.0482219	0.0097243	24	23	4	64.3	64.3	21.9	35.915	0	323.31	4277800000	516	27.1263	27.1917	27.0072	27.1477	27.1216	26.8931	27.01	26.9071	27.1297	27.0798	26.8768		P97429	ANXA4_MOUSE	Anxa4	Annexin A4
P97431	IRF6_MOUSE	Irf6	Interferon regulatory factor 6		0	-0.42881	3	3	3	8.4	8.4	8.4	53.11	0.00028265	8.5789	56963000	19	NaN	23.9897	23.7535	NaN	24.3004	NaN	NaN	NaN	NaN	NaN	NaN		P97431	IRF6_MOUSE	Irf6	Interferon regulatory factor 6
P97447	FHL1_MOUSE	Fhl1	Four and a half LIM domains protein 1		0.574967	0.523104	16	16	16	62.1	62.1	62.1	31.888	0	61.141	1450300000	163	23.218	24.7693	24.5198	24.8274	23.5308	23.5715	23.4814	24.8078	23.2758	24.5479	22.8843		P97447	FHL1_MOUSE	Fhl1	Four and a half LIM domains protein 1
P97449	AMPN_MOUSE	Anpep	Aminopeptidase N		0.984384	0.889055	20	20	20	26.5	26.5	26.5	109.65	0	83.111	739370000	132	25.1628	25.3617	25.0099	25.1699	24.22	24.6445	25.5419	22.2375	24.823	24.3819	24.714		P97449	AMPN_MOUSE	Anpep	Aminopeptidase N
P97450	ATP5J_MOUSE	Atp5pf	ATP synthase-coupling factor 6, mitochondrial		0.321547	0.0764422	6	6	6	50.9	50.9	50.9	12.496	0	323.31	7624000000	196	27.5015	27.4493	27.6997	27.7932	27.543	27.7798	27.4698	27.8345	27.3189	27.6571	27.5165		P97450	ATP5J_MOUSE	Atp5pf	ATP synthase-coupling factor 6, mitochondrial
P97452	BOP1_MOUSE	Bop1	Ribosome biogenesis protein BOP1		0	-0.0708585	3	3	3	5.9	5.9	5.9	82.545	0.0072559	3.1397	34775000	8	NaN	22.3992	NaN	22.1157	22.1647	22.2931	21.5675	NaN	NaN	NaN	NaN		P97452	BOP1_MOUSE	Bop1	Ribosome biogenesis protein BOP1
A0A0U1RP93	A0A0U1RP93_MOUSE	Mylpf	Myosin regulatory light chain 2, skeletal muscle isoform		0.832272	0.618179	9	9	9	51.7	51.7	51.7	16.881	0	37.799	274680000	53	NaN	23.5949	22.9034	23.3281	22.2715	NaN	NaN	22.5	NaN	23.2004	NaN		A0A0U1RP93	A0A0U1RP93_MOUSE	Mylpf	Myosin regulatory light chain 2, skeletal muscle isoform
P97464	EXT1_MOUSE	Ext1	Exostosin-1		0	NaN	2	2	2	4.8	4.8	4.8	86.307	0	12.703	9445500	4	NaN	NaN	NaN	NaN	NaN	NaN	NaN	NaN	NaN	NaN	NaN		P97464	EXT1_MOUSE	Ext1	Exostosin-1
P97465	DOK1_MOUSE	Dok1	Docking protein 1		0.271949	-0.127334	6	6	6	17.4	17.4	17.4	52.451	0	12.49	49326000	26	22.406	22.7415	NaN	22.1253	22.733	NaN	NaN	22.4837	NaN	22.6595	22.5214		P97465	DOK1_MOUSE	Dok1	Docking protein 1
P97470	PP4C_MOUSE	Ppp4c	Serine/threonine-protein phosphatase 4 catalytic subunit		0.158967	0.0839923	9	7	7	32.6	27.7	27.7	35.08	0	44.249	143950000	48	25.0589	24.8374	25.2155	25.3826	24.9723	25.3256	24.7432	24.5923	25.5234	25.3384	24.6159		P97470	PP4C_MOUSE	Ppp4c	Serine/threonine-protein phosphatase 4 catalytic subunit
P97471	SMAD4_MOUSE	Smad4	Mothers against decapentaplegic homolog 4		0	NaN	4	4	4	7.3	7.3	7.3	60.341	0.0072896	3.1839	26962000	10	NaN	NaN	NaN	NaN	NaN	NaN	NaN	NaN	NaN	NaN	NaN		P97471	SMAD4_MOUSE	Smad4	Mothers against decapentaplegic homolog 4
P97478	COQ7_MOUSE	Coq7	5-demethoxyubiquinone hydroxylase, mitochondrial		0.101376	0.0587805	7	7	7	40.6	40.6	40.6	24.041	0	14.287	176950000	70	23.4176	NaN	23.5003	23.2823	22.7951	23.4575	22.9841	23.512	22.9652	23.7828	23.0112		P97478	COQ7_MOUSE	Coq7	5-demethoxyubiquinone hydroxylase, mitochondrial
G3UZY2	G3UZY2_MOUSE	Txn2	Thioredoxin, mitochondrial (Fragment)		1.03117	0.289577	4	4	4	28.5	28.5	28.5	14.099	0	12.77	254930000	54	24.6527	24.9194	24.7671	24.7186	24.9874	25.045	24.7549	24.5078	24.6539	24.011	24.4958		G3UZY2	G3UZY2_MOUSE	Txn2	Thioredoxin, mitochondrial (Fragment)
P97494	GSH1_MOUSE	Gclc	Glutamate--cysteine ligase catalytic subunit		0.080384	0.0425161	13	13	13	28.1	28.1	28.1	72.571	0	41.409	299100000	66	23.3444	23.6491	23.186	23.7687	23.4251	23.4566	24.1578	23.2922	23.9534	23.8329	23.7588		P97494	GSH1_MOUSE	Gclc	Glutamate--cysteine ligase catalytic subunit
P97499	TEP1_MOUSE	Tep1	Telomerase protein component 1		0.292562	-0.50821	3	3	3	2	2	2	291.46	0.00053619	6.9137	423440000	16	27.4026	27.3234	26.0305	27.9719	NaN	26.1549	NaN	NaN	NaN	27.3541	NaN		P97499	TEP1_MOUSE	Tep1	Telomerase protein component 1
P97742	CPT1A_MOUSE	Cpt1a	Carnitine O-palmitoyltransferase 1, liver isoform		0.400971	-0.0584793	5	5	5	8.7	8.7	8.7	88.25	0.0015217	5.4649	107080000	28	23.3008	23.275	23.5121	23.4139	23.6015	23.4413	23.4257	23.5193	23.5299	NaN	23.4089		P97742	CPT1A_MOUSE	Cpt1a	Carnitine O-palmitoyltransferase 1, liver isoform
P97760	RPB3_MOUSE	Polr2c	DNA-directed RNA polymerase II subunit RPB3		0	NaN	2	2	2	12	12	12	31.443	0.00054039	7.1175	14066000	6	NaN	NaN	NaN	NaN	NaN	NaN	NaN	NaN	NaN	NaN	NaN		P97760	RPB3_MOUSE	Polr2c	DNA-directed RNA polymerase II subunit RPB3
P97765	WBP2_MOUSE	Wbp2	WW domain-binding protein 2		0.577194	0.128188	5	5	5	24.1	24.1	24.1	28.032	0	14.75	299810000	50	23.3342	23.7213	23.2321	23.418	23.3741	23.4939	23.5968	23.0414	23.4884	23.5179	23.4296		P97765	WBP2_MOUSE	Wbp2	WW domain-binding protein 2
P97770	THUM3_MOUSE	Thumpd3	THUMP domain-containing protein 3		0.613613	-0.205375	5	5	5	12.3	12.3	12.3	56.431	0.00052466	6.4164	57473000	24	23.1868	23.1548	23.1721	23.0848	NaN	23.34	NaN	NaN	23.5998	NaN	NaN		P97770	THUM3_MOUSE	Thumpd3	THUMP domain-containing protein 3
P97807	FUMH_MOUSE	Fh	Fumarate hydratase, mitochondrial		0.666104	-0.0943635	28	28	28	65.7	65.7	65.7	54.356	0	323.31	8654400000	974	27.873	27.9434	27.9079	28.0184	28.0885	27.851	27.8449	28.2212	27.9227	27.8641	28.0754		P97807	FUMH_MOUSE	Fh	Fumarate hydratase, mitochondrial
P97821	CATC_MOUSE	Ctsc	Dipeptidyl peptidase 1		0.984543	-0.18989	10	10	10	25.8	25.8	25.8	52.376	0	129.49	992210000	126	25.516	25.6187	25.7272	25.6393	26.0151	25.3304	25.396	25.691	25.6039	25.7388	25.8283		P97821	CATC_MOUSE	Ctsc	Dipeptidyl peptidase 1
E9Q5H2	E9Q5H2_MOUSE	Anp32e	Acidic leucine-rich nuclear phosphoprotein 32 family member E (Fragment)		0	NaN	2	2	2	13.1	13.1	13.1	12.078	0.0072977	3.2001	47504000	12	NaN	NaN	NaN	NaN	NaN	NaN	NaN	NaN	NaN	NaN	NaN		E9Q5H2	E9Q5H2_MOUSE	Anp32e	Acidic leucine-rich nuclear phosphoprotein 32 family member E (Fragment)
J3QP56	J3QP56_MOUSE	Lypla1	Acyl-protein thioesterase 1		0.741164	-0.14245	8	8	8	54.5	54.5	54.5	23.726	0	172.99	2424500000	195	27.6118	27.5962	27.6613	27.4959	27.778	27.4504	27.6354	27.893	27.7917	27.3457	27.8415		J3QP56	J3QP56_MOUSE	Lypla1	Acyl-protein thioesterase 1
P97825	JUPI1_MOUSE	Jpt1	Jupiter microtubule associated homolog 1		0.217444	-0.200891	2	2	2	26	26	26	16.08	0	12.578	112230000	27	NaN	NaN	23.9234	24.1374	23.9175	NaN	NaN	NaN	NaN	24.545	NaN		P97825	JUPI1_MOUSE	Jpt1	Jupiter microtubule associated homolog 1
P97855	G3BP1_MOUSE	G3bp1	Ras GTPase-activating protein-binding protein 1		0.149338	0.0266748	18	18	17	51.4	51.4	48.8	51.828	0	152.33	2928000000	410	26.2569	26.2415	26.3428	26.3879	26.1547	26.4661	26.4628	26.3364	26.4841	26.4458	26.4435		P97855	G3BP1_MOUSE	G3bp1	Ras GTPase-activating protein-binding protein 1
P97858	S35B1_MOUSE	Slc35b1	Solute carrier family 35 member B1		0.0531214	-0.0595255	2	2	2	8.1	8.1	8.1	35.882	0.0043749	3.7134	41978000	19	23.2666	23.6192	23.6863	NaN	NaN	22.6765	23.6465	23.6668	NaN	NaN	NaN		P97858	S35B1_MOUSE	Slc35b1	Solute carrier family 35 member B1
A2BG76	A2BG76_MOUSE	Nfib	Nuclear factor 1		0.702799	0.176287	10	10	8	26.1	26.1	21.8	54.776	0	45.582	657860000	123	24.8524	25.0616	25.0611	24.8795	24.5396	25.0443	24.7842	24.6901	25.1857	24.9494	24.5218		A2BG76	A2BG76_MOUSE	Nfib	Nuclear factor 1
P97864	CASP7_MOUSE	Casp7	Caspase-7		0.182166	0.114488	8	8	8	29.4	29.4	29.4	34.06	0	34.137	215440000	72	25.0429	25.1159	25.0309	25.2377	24.4879	25.5799	25.2702	24.9465	25.5682	25.9174	24.8318		P97864	CASP7_MOUSE	Casp7	Caspase-7
P97926	OXYR_MOUSE	Oxtr	Oxytocin receptor		0	-0.221981	2	2	2	7.5	7.5	7.5	42.804	0	79.919	152790000	7	27.5238	NaN	27.3018	NaN	NaN	NaN	NaN	NaN	NaN	NaN	NaN		P97926	OXYR_MOUSE	Oxtr	Oxytocin receptor
P97927	LAMA4_MOUSE	Lama4	Laminin subunit alpha-4		1.35533	-0.28012	12	12	12	8.4	8.4	8.4	201.82	0	28.858	447950000	87	23.944	23.7466	23.3707	23.916	23.9938	23.67	23.7366	23.8349	24.3446	23.8822	23.809		P97927	LAMA4_MOUSE	Lama4	Laminin subunit alpha-4
P97930	KTHY_MOUSE	Dtymk	Thymidylate kinase		1.80893	-0.647352	4	4	4	25.5	25.5	25.5	23.914	0.0039562	3.8824	62690000	19	21.9604	21.4929	NaN	NaN	22.4006	NaN	21.4891	22.2237	NaN	NaN	21.9686		P97930	KTHY_MOUSE	Dtymk	Thymidylate kinase
A0A0R4J104	A0A0R4J104_MOUSE	Dab2	Disabled homolog 2		0.224041	0.0196504	31	31	31	45.8	45.8	45.8	82.212	0	323.31	9525000000	888	27.2775	27.307	27.3934	27.3253	27.33	27.3348	27.2149	27.3875	27.2715	27.2716	27.2345		A0A0R4J104	A0A0R4J104_MOUSE	Dab2	Disabled homolog 2
P98083	SHC1_MOUSE	Shc1	SHC-transforming protein 1		1.05964	-0.269361	4	4	4	9.5	9.5	9.5	62.607	0.00030798	11.93	70945000	29	21.4219	21.591	21.314	21.5859	21.8391	21.4499	21.1202	21.6426	21.3509	21.9903	21.8446		P98083	SHC1_MOUSE	Shc1	SHC-transforming protein 1
P98086	C1QA_MOUSE	C1qa	Complement C1q subcomponent subunit A		0.585458	-0.31911	2	2	2	11.4	11.4	11.4	25.974	0.0066667	3.2505	88800000	20	NaN	NaN	NaN	24.017	24.5503	24.0328	24.5177	NaN	24.1788	NaN	24.7957		P98086	C1QA_MOUSE	C1qa	Complement C1q subcomponent subunit A
A0A286YCV0	A0A286YCV0_MOUSE	Atp9b	Phospholipid-transporting ATPase		0	NaN	5	3	3	5.9	4	4	127.94	0.0016827	4.3802	12463000	8	NaN	NaN	NaN	NaN	NaN	NaN	NaN	NaN	NaN	NaN	NaN		A0A286YCV0	A0A286YCV0_MOUSE	Atp9b	Phospholipid-transporting ATPase
P98203	ARVC_MOUSE	Arvcf	Armadillo repeat protein deleted in velo-cardio-facial syndrome homolog		0	NaN	2	2	2	3.5	3.5	3.5	105.06	0.0070891	3.2294	68467000	19	NaN	NaN	NaN	NaN	22.7232	NaN	NaN	NaN	22.6161	NaN	NaN		P98203	ARVC_MOUSE	Arvcf	Armadillo repeat protein deleted in velo-cardio-facial syndrome homolog
P99024	TBB5_MOUSE	Tubb5	Tubulin beta-5 chain		0.0101825	0.00465908	42	8	7	82.4	22.7	19.4	49.67	0	323.31	14170000000	904	29.2031	29.3547	28.7751	29.2713	29.2047	28.9343	28.9786	29.1554	28.5829	28.9003	29.3023		P99024	TBB5_MOUSE	Tubb5	Tubulin beta-5 chain
P99026	PSB4_MOUSE	Psmb4	Proteasome subunit beta type-4		0.532478	0.0742839	8	8	8	41.3	41.3	41.3	29.116	0	122.33	2912200000	349	25.8752	25.9225	26.0342	25.9021	25.7672	25.7816	25.8334	25.795	25.9342	25.6199	25.9315		P99026	PSB4_MOUSE	Psmb4	Proteasome subunit beta type-4
P99027	RLA2_MOUSE	Rplp2	60S acidic ribosomal protein P2		0.611004	-0.04902	12	12	12	94.8	94.8	94.8	11.651	0	323.31	52683000000	1419	30.114	30.1234	30.0922	29.987	30.0079	29.9524	29.9286	30.082	30.0548	30.0349	30.101		P99027	RLA2_MOUSE	Rplp2	60S acidic ribosomal protein P2
P99028	QCR6_MOUSE	Uqcrh	Cytochrome b-c1 complex subunit 6, mitochondrial		0.104924	-0.030092	4	4	4	47.2	47.2	47.2	10.435	0	323.31	1389800000	302	24.8272	24.5694	24.8647	24.8476	24.9122	24.5763	24.7204	24.7873	24.8286	24.7714	24.3479		P99028	QCR6_MOUSE	Uqcrh	Cytochrome b-c1 complex subunit 6, mitochondrial
P99029	PRDX5_MOUSE	Prdx5	Peroxiredoxin-5, mitochondrial		0.471946	0.0649408	14	14	14	58.6	58.6	58.6	21.897	0	323.31	12668000000	1028	28.0765	28.2311	28.2362	28.2084	28.1456	28.181	28.1414	28.0281	27.9888	28.367	28.2019		P99029	PRDX5_MOUSE	Prdx5	Peroxiredoxin-5, mitochondrial
Q00519	XDH_MOUSE	Xdh	Xanthine dehydrogenase/oxidase		1.40267	0.245477	85	85	84	76.8	76.8	76	146.56	0	323.31	81798000000	5341	29.2513	29.8045	29.7986	29.9954	29.6164	29.7414	29.4881	29.5761	29.5251	29.45	29.702		Q00519	XDH_MOUSE	Xdh	Xanthine dehydrogenase/oxidase
Q00558	HAP40_MOUSE	F8a1	40-kDa huntingtin-associated protein		0	-0.136689	4	4	4	13.7	13.7	13.7	40.489	0.00052798	6.5666	44430000	14	NaN	22.43	NaN	22.0413	NaN	NaN	NaN	NaN	NaN	NaN	22.3724		Q00558	HAP40_MOUSE	F8a1	40-kDa huntingtin-associated protein
Q00612	G6PD1_MOUSE	G6pdx	Glucose-6-phosphate 1-dehydrogenase X		1.00233	-0.0977346	53	53	42	80.2	80.2	72.4	59.262	0	323.31	68004000000	3431	30.1077	30.1112	30.1775	30.0083	30.0704	29.8971	29.9738	30.2415	30.1389	30.1528	30.0765		Q00612	G6PD1_MOUSE	G6pdx	Glucose-6-phosphate 1-dehydrogenase X
Q00623	APOA1_MOUSE	Apoa1	Apolipoprotein A-I		0.588978	-0.121293	33	33	33	78.4	78.4	78.4	30.615	0	323.31	79252000000	2411	29.8138	29.4215	29.3359	29.494	29.4486	29.4908	29.7317	29.8702	29.5237	29.5505	29.4896		Q00623	APOA1_MOUSE	Apoa1	Apolipoprotein A-I
Q00724	RET4_MOUSE	Rbp4	Retinol-binding protein 4		0.387418	-0.226906	7	7	7	36.8	36.8	36.8	23.206	0	36.514	503210000	85	26.6711	25.4022	26.0267	25.9568	26.0146	26.7617	26.1305	25.9736	26.5637	26.6531	25.8188		Q00724	RET4_MOUSE	Rbp4	Retinol-binding protein 4
Q00897	A1AT4_MOUSE	Serpina1d	Alpha-1-antitrypsin 1-4		0.567052	-0.151806	29	29	11	57.9	57.9	27.6	45.998	0	323.31	93185000000	3425	31.4236	30.9118	30.9893	31.1322	31.1862	31.0347	30.996	31.3657	30.7813	30.8647	31.3661		Q00897	A1AT4_MOUSE	Serpina1d	Alpha-1-antitrypsin 1-4
Q00898	A1AT5_MOUSE	Serpina1e	Alpha-1-antitrypsin 1-5		0.336318	-0.248444	17	7	7	36.8	18.4	18.4	45.891	0	269.07	746370000	141	25.1679	25.2933	25.1272	24.2179	24.555	25.5316	25.4354	25.2817	26.1651	25.6812	25.3661		Q00898	A1AT5_MOUSE	Serpina1e	Alpha-1-antitrypsin 1-5
Q00915	RET1_MOUSE	Rbp1	Retinol-binding protein 1		0.449626	0.167188	8	8	8	60.7	60.7	60.7	15.846	0	27.958	354910000	74	24.0703	23.7553	23.8241	23.9579	23.6671	23.5899	23.4378	23.0448	23.506	23.5609	23.4257		Q00915	RET1_MOUSE	Rbp1	Retinol-binding protein 1
Q00PI9	HNRL2_MOUSE	Hnrnpul2	Heterogeneous nuclear ribonucleoprotein U-like protein 2		0.00825275	-0.0112556	26	26	26	33.3	33.3	33.3	84.939	0	144.18	1070300000	217	25.5561	25.4148	25.1353	25.1676	23.706	26.0499	25.9977	25.926	26.2828	26.1676	25.7474		Q00PI9	HNRL2_MOUSE	Hnrnpul2	Heterogeneous nuclear ribonucleoprotein U-like protein 2
Q01149	CO1A2_MOUSE	Col1a2	Collagen alpha-2(I) chain		0	NaN	4	4	4	3.5	3.5	3.5	129.56	0.00029146	9.5792	421850000	28	NaN	NaN	NaN	NaN	NaN	NaN	NaN	NaN	NaN	NaN	NaN		Q01149	CO1A2_MOUSE	Col1a2	Collagen alpha-2(I) chain
Q01237	HMDH_MOUSE	Hmgcr	3-hydroxy-3-methylglutaryl-coenzyme A reductase		1.19599	0.471579	11	11	11	16	16	16	97.039	0	23.527	153500000	49	23.1592	23.7194	23.6084	23.6634	22.9915	23.472	22.9748	22.6138	23.4598	23.4191	22.4529		Q01237	HMDH_MOUSE	Hmgcr	3-hydroxy-3-methylglutaryl-coenzyme A reductase
Q01279	EGFR_MOUSE	Egfr	Epidermal growth factor receptor		0.0185524	-0.0067056	12	12	12	14	14	14	134.85	0	27.815	340760000	82	24.468	24.0433	24.3619	24.4762	24.1019	24.6835	24.4649	24.5092	24.296	24.5615	24.5394		Q01279	EGFR_MOUSE	Egfr	Epidermal growth factor receptor
Q01339	APOH_MOUSE	Apoh	Beta-2-glycoprotein 1		1.70548	-0.155108	17	17	17	47.8	47.8	47.8	38.618	0	171.33	4357800000	430	27.2337	26.8392	26.9663	26.9472	27.1786	26.9335	27.0814	27.1174	27.0523	26.9679	27.1018		Q01339	APOH_MOUSE	Apoh	Beta-2-glycoprotein 1
E9Q1S3	E9Q1S3_MOUSE	Sec23a	Protein transport protein SEC23		0.306408	-0.0358104	32	27	27	61.4	57.5	57.5	82.955	0	323.31	2730400000	424	26.8045	26.6871	26.6711	26.5695	26.7412	26.6031	26.764	26.6037	26.7546	26.5826	26.682		E9Q1S3	E9Q1S3_MOUSE	Sec23a	Protein transport protein SEC23
Q01853	TERA_MOUSE	Vcp	Transitional endoplasmic reticulum ATPase		0.0503023	0.00599505	72	72	72	80.1	80.1	80.1	89.321	0	323.31	54900000000	4980	28.958	29.0449	28.9512	29.0687	28.9622	28.8687	29.0482	28.9251	29.072	28.983	29.042		Q01853	TERA_MOUSE	Vcp	Transitional endoplasmic reticulum ATPase
Q02013	AQP1_MOUSE	Aqp1	Aquaporin-1		1.2918	-0.408271	4	4	4	26.8	26.8	26.8	28.793	0	242.74	480480000	79	25.1614	25.2522	24.7767	24.846	25.2131	24.3834	24.5204	25.1345	25.6269	25.0403	24.8079		Q02013	AQP1_MOUSE	Aqp1	Aquaporin-1
Q02053	UBA1_MOUSE	Uba1	Ubiquitin-like modifier-activating enzyme 1		0.112673	0.0141126	57	57	57	71.6	71.6	71.6	117.81	0	323.31	22087000000	2134	28.1192	28.132	27.9867	28.029	27.9586	27.8905	28.0474	27.9415	28.0475	27.958	27.9932		Q02053	UBA1_MOUSE	Uba1	Ubiquitin-like modifier-activating enzyme 1
Q02105	C1QC_MOUSE	C1qc	Complement C1q subcomponent subunit C		0.305405	-0.246321	3	3	3	15.9	15.9	15.9	25.991	0.00028744	9.2602	113210000	32	NaN	21.8553	NaN	22.3056	22.2276	22.8763	21.9567	NaN	22.9577	22.2991	NaN		Q02105	C1QC_MOUSE	C1qc	Complement C1q subcomponent subunit C
Q02248	CTNB1_MOUSE	Ctnnb1	Catenin beta-1		0.0849875	0.0205065	33	33	28	57.9	57.9	52.5	85.47	0	315.27	2893500000	535	26.5769	26.6772	26.6105	26.4823	26.4386	26.6587	26.8182	26.6502	26.8124	26.8214	26.4738		Q02248	CTNB1_MOUSE	Ctnnb1	Catenin beta-1
Q02257	PLAK_MOUSE	Jup	Junction plakoglobin		0.338143	0.0853933	29	24	24	50.7	45.1	45.1	81.8	0	75.505	2053300000	235	28.4572	28.656	28.479	28.4539	28.3002	28.4118	28.8857	28.3389	28.7738	28.5428	28.5382		Q02257	PLAK_MOUSE	Jup	Junction plakoglobin
Q02496	MUC1_MOUSE	Muc1	Mucin-1		0.104825	-0.0360674	5	5	5	14.1	14.1	14.1	64.538	0	92.755	606290000	73	24.6533	24.513	24.3063	25.0325	24.7297	24.8431	24.763	24.8041	24.8643	24.513	24.8015		Q02496	MUC1_MOUSE	Muc1	Mucin-1
Q02596	GLCM1_MOUSE	Glycam1	Glycosylation-dependent cell adhesion molecule 1		0.724018	0.491955	8	8	3	77.5	77.5	36.4	16.209	0	323.31	74505000000	1882	31.2597	30.8688	31.0174	31.187	31.2103	31.4533	30.5416	30.1613	29.4607	30.2051	30.8327		Q02596	GLCM1_MOUSE	Glycam1	Glycosylation-dependent cell adhesion molecule 1
B1AUB8	B1AUB8_MOUSE	Nfia	Nuclear factor 1		0.0404275	0.0191773	9	7	2	37.4	31.8	16.1	42.304	0	29.851	302090000	67	24.5835	24.5826	24.6865	24.3374	24.3202	24.8583	24.452	24.6724	24.9625	24.7772	24.0691		B1AUB8	B1AUB8_MOUSE	Nfia	Nuclear factor 1
Q02788	CO6A2_MOUSE	Col6a2	Collagen alpha-2(VI) chain		0.598431	-0.276915	21	21	21	20.1	20.1	20.1	110.33	0	156.65	2630500000	349	26.6617	26.743	26.902	26.7166	27.5485	27.0638	27.2997	27.1832	27.9315	27.0261	26.9808		Q02788	CO6A2_MOUSE	Col6a2	Collagen alpha-2(VI) chain
A0A1C7CYU3	A0A1C7CYU3_MOUSE	Nucb1	Nucleobindin-1		0.511554	0.10993	15	15	15	39.3	39.3	39.3	52.997	0	32.59	388310000	104	23.1777	23.4439	22.9734	23.1838	23.0452	23.213	23.3972	23.1028	22.8972	23.2864	23.2846		A0A1C7CYU3	A0A1C7CYU3_MOUSE	Nucb1	Nucleobindin-1
Q02862	CS2LA_MOUSE	Csn1s2a	Alpha-S2-casein-like A		0.136879	0.061468	15	15	3	59.8	59.8	15.8	21.1	0	323.31	516420000000	3828	33.5136	33.2738	33.5725	33.9317	33.9123	33.7787	33.9858	33.7905	33.1935	33.5629	33.9095		Q02862	CS2LA_MOUSE	Csn1s2a	Alpha-S2-casein-like A
A0A0A6YXC8	A0A0A6YXC8_MOUSE	Enah	Protein enabled homolog		1.89934	1.13795	5	5	5	12.8	12.8	12.8	58.35	0.0041705	3.8032	170380000	14	NaN	23.5378	NaN	23.7947	22.3202	23.7773	NaN	NaN	22.8104	NaN	NaN		A0A0A6YXC8	A0A0A6YXC8_MOUSE	Enah	Protein enabled homolog
Q03249	GALT_MOUSE	Galt	Galactose-1-phosphate uridylyltransferase		0.136662	0.0881507	4	4	4	21.9	21.9	21.9	43.232	0.00028329	8.6739	158540000	36	23.0038	24.0692	NaN	23.4491	23.5586	NaN	23.5683	23.6634	23.8479	24.0455	23.525		Q03249	GALT_MOUSE	Galt	Galactose-1-phosphate uridylyltransferase
Q03265	ATPA_MOUSE	Atp5f1a	ATP synthase subunit alpha, mitochondrial		0.166468	0.0439786	49	49	49	74	74	74	59.752	0	323.31	177510000000	5316	32.7947	32.7157	32.9463	32.8806	32.821	33.1944	32.5716	32.8751	32.741	32.9598	32.7147		Q03265	ATPA_MOUSE	Atp5f1a	ATP synthase subunit alpha, mitochondrial
Q03734	SPA3M_MOUSE	Serpina3m	Serine protease inhibitor A3M		0	NaN	14	4	3	34.4	11.7	9.1	47.064	0	22.878	110410000	19	23.4219	NaN	NaN	NaN	23.2838	NaN	NaN	NaN	NaN	NaN	NaN		Q03734	SPA3M_MOUSE	Serpina3m	Serine protease inhibitor A3M
Q03958	PFD6_MOUSE	Pfdn6	Prefoldin subunit 6		1.12366	-0.205286	5	5	5	44.1	44.1	44.1	14.454	0	13.303	351760000	77	24.8849	24.8925	24.582	24.497	24.845	24.3383	24.4416	24.628	24.5767	24.8247	24.774		Q03958	PFD6_MOUSE	Pfdn6	Prefoldin subunit 6
Q03963	E2AK2_MOUSE	Eif2ak2	Interferon-induced, double-stranded RNA-activated protein kinase		1.8936	0.183162	12	12	12	31.5	31.5	31.5	58.279	0	63.983	561460000	126	23.0001	23.1943	23.3144	23.2697	23.0828	23.2467	23.4154	23.1395	23.289	22.9986	23.1198		Q03963	E2AK2_MOUSE	Eif2ak2	Interferon-induced, double-stranded RNA-activated protein kinase
Q04207	TF65_MOUSE	Rela	Transcription factor p65		0.400064	-0.148938	9	9	9	18.9	18.9	18.9	60.211	0	42.061	391100000	87	25.0824	25.4519	25.2239	24.845	25.4847	24.707	24.8836	25.0684	24.9624	24.9387	25.4907		Q04207	TF65_MOUSE	Rela	Transcription factor p65
Q04447	KCRB_MOUSE	Ckb	Creatine kinase B-type		0.0682792	-0.0140172	19	19	19	67.5	67.5	67.5	42.713	0	323.31	4826400000	724	26.6509	26.7362	26.5011	26.6986	26.7806	26.598	26.7099	26.5009	26.5952	26.5749	26.8742		Q04447	KCRB_MOUSE	Ckb	Creatine kinase B-type
Q04692	SMRCD_MOUSE	Smarcad1	SWI/SNF-related matrix-associated actin-dependent regulator of chromatin subfamily A containing DEAD/H box 1		0.488685	-0.449105	3	3	3	4.1	4.1	4.1	116.45	0.0045851	3.6676	3493600000	95	27.2157	NaN	25.7711	27.103	NaN	27.1616	27.5675	28.1721	27.3187	26.8559	27.1871		Q04692	SMRCD_MOUSE	Smarcad1	SWI/SNF-related matrix-associated actin-dependent regulator of chromatin subfamily A containing DEAD/H box 1
Q04750	TOP1_MOUSE	Top1	DNA topoisomerase 1		0.0186252	-0.00687917	13	13	13	18.9	18.9	18.9	90.875	0	44.895	566220000	129	23.3117	23.0952	23.0487	23.1327	22.9373	23.0405	23.2335	22.9484	23.5601	22.8398	23.1046		Q04750	TOP1_MOUSE	Top1	DNA topoisomerase 1
Q04857	CO6A1_MOUSE	Col6a1	Collagen alpha-1(VI) chain		0.385989	-0.218002	28	28	28	33.3	33.3	33.3	108.49	0	303.24	3537200000	404	25.2235	25.1994	25.4752	25.2273	26.1045	25.6989	25.6233	25.5782	26.493	25.2617	25.316		Q04857	CO6A1_MOUSE	Col6a1	Collagen alpha-1(VI) chain
Q04888	SOX10_MOUSE	Sox10	Transcription factor SOX-10		0.0880731	-0.0352341	2	2	2	9	9	9	49.949	0	44.584	189570000	28	22.7256	23.0152	22.6988	22.8048	22.4351	22.6161	22.8715	23.2048	NaN	22.9995	22.8175		Q04888	SOX10_MOUSE	Sox10	Transcription factor SOX-10
Q04899	CDK18_MOUSE	Cdk18	Cyclin-dependent kinase 18		0	NaN	4	3	1	10.6	8.9	3.3	51.847	0.0072384	3.1212	22844000	8	NaN	NaN	NaN	NaN	NaN	NaN	NaN	NaN	NaN	NaN	NaN		Q04899	CDK18_MOUSE	Cdk18	Cyclin-dependent kinase 18
Q05020	APOC2_MOUSE	Apoc2	Apolipoprotein C-II		0	0.573696	2	2	2	30.9	30.9	30.9	10.741	0.0037523	3.9945	137390000	15	NaN	NaN	NaN	23.6287	23.462	NaN	NaN	NaN	22.6479	NaN	NaN		Q05020	APOC2_MOUSE	Apoc2	Apolipoprotein C-II
Q05144	RAC2_MOUSE	Rac2	Ras-related C3 botulinum toxin substrate 2		0.0862835	0.156738	8	3	3	42.7	19.8	19.8	21.441	0.0050137	3.5782	118200000	20	22.9588	23.0998	NaN	23.0789	22.8064	NaN	24.7507	NaN	23.6754	NaN	24.5049		Q05144	RAC2_MOUSE	Rac2	Ras-related C3 botulinum toxin substrate 2
Q05186	RCN1_MOUSE	Rcn1	Reticulocalbin-1		0.237205	0.550053	7	7	7	22.5	22.5	22.5	38.113	0	13.743	64432000	20	NaN	22.661	NaN	20.992	NaN	NaN	NaN	NaN	21.357	NaN	21.196		Q05186	RCN1_MOUSE	Rcn1	Reticulocalbin-1
Q05421	CP2E1_MOUSE	Cyp2e1	Cytochrome P450 2E1		0.733213	-0.395837	13	13	13	25.2	25.2	25.2	56.804	0	23.928	462630000	99	25.6007	25.162	24.7019	24.208	25.4516	25.3596	25.5768	25.0645	25.3098	25.9714	24.987		Q05421	CP2E1_MOUSE	Cyp2e1	Cytochrome P450 2E1
Q05512	MARK2_MOUSE	Mark2	Serine/threonine-protein kinase MARK2		0.225542	-0.0963191	10	10	10	17.3	17.3	17.3	86.305	0	22.429	236050000	84	22.1863	21.9611	22.0352	21.8497	21.8137	22.1987	22.2063	22.0033	22.7832	22.2659	21.8268		Q05512	MARK2_MOUSE	Mark2	Serine/threonine-protein kinase MARK2
Q05816	FABP5_MOUSE	Fabp5	Fatty acid-binding protein 5		1.68285	-0.321503	9	9	9	80	80	80	15.137	0	323.31	24880000000	1155	28.1698	27.7396	27.5095	27.5017	27.672	27.5871	27.992	27.9387	28.1104	28.0518	27.9823		Q05816	FABP5_MOUSE	Fabp5	Fatty acid-binding protein 5
S4R2R4	S4R2R4_MOUSE	Rnasel	2-5A-dependent ribonuclease (Fragment)		0.698722	0.366039	9	9	9	14.1	14.1	14.1	76.201	0.0010398	6.1056	149290000	18	23.8664	23.7808	NaN	24.5498	23.7438	NaN	NaN	NaN	NaN	23.7732	23.8136		S4R2R4	S4R2R4_MOUSE	Rnasel	2-5A-dependent ribonuclease (Fragment)
Q05D44	IF2P_MOUSE	Eif5b	Eukaryotic translation initiation factor 5B		0.136581	0.0176535	58	58	58	49.3	49.3	49.3	137.61	0	323.31	6636500000	1017	27.7771	27.7784	27.9405	27.8529	27.7774	27.9919	27.8073	27.8658	27.966	27.9126	27.8403		Q05D44	IF2P_MOUSE	Eif5b	Eukaryotic translation initiation factor 5B
Q06138	CAB39_MOUSE	Cab39	Calcium-binding protein 39		0.287891	-0.0554371	21	21	17	54.8	54.8	47.2	39.842	0	52.749	1437600000	306	25.6901	25.5763	25.8058	25.6899	25.5499	25.4273	25.8066	25.7638	25.7247	25.6872	25.8842		Q06138	CAB39_MOUSE	Cab39	Calcium-binding protein 39
Q06185	ATP5I_MOUSE	Atp5me	ATP synthase subunit e, mitochondrial		0.577205	-0.162127	6	6	6	67.6	67.6	67.6	8.2355	0	101.4	5269200000	377	27.5113	27.22	27.4774	27.3192	27.5817	27.8543	27.3476	27.7245	27.6061	27.9123	27.2991		Q06185	ATP5I_MOUSE	Atp5me	ATP synthase subunit e, mitochondrial
Q5U3L0	Q5U3L0_MOUSE	Sh3bp2	SH3 domain-binding protein 2		0	NaN	4	4	4	12.3	12.3	12.3	62.188	0.0014793	4.8868	23335000	6	NaN	23.0393	NaN	22.9704	NaN	NaN	NaN	NaN	NaN	NaN	NaN		Q5U3L0	Q5U3L0_MOUSE	Sh3bp2	SH3 domain-binding protein 2
Q06770	CBG_MOUSE	Serpina6	Corticosteroid-binding globulin		0.484602	-0.233049	7	7	7	22.9	22.9	22.9	44.769	0	25.654	562980000	103	25.4717	23.9701	24.849	25.0611	24.9939	25.0343	24.7332	24.582	24.9393	24.7609	25.0277		Q06770	CBG_MOUSE	Serpina6	Corticosteroid-binding globulin
Q06890	CLUS_MOUSE	Clu	Clusterin		1.20675	0.501301	30	30	30	53.6	53.6	53.6	51.655	0	323.31	59365000000	2597	28.8928	29.3348	28.762	29.7545	28.9951	29.075	29.5741	28.5271	28.2867	28.7044	29.3865		Q06890	CLUS_MOUSE	Clu	Clusterin
A0A2C9F2D2	A0A2C9F2D2_MOUSE	Anxa7	Annexin		1.54804	0.17289	18	18	17	37.9	37.9	36.5	52.27	0	323.31	6085900000	465	28.251	28.5542	28.3168	28.363	28.1489	28.5475	28.4354	28.1815	28.371	28.4366	28.2339		A0A2C9F2D2	A0A2C9F2D2_MOUSE	Anxa7	Annexin
Q07079	IBP5_MOUSE	Igfbp5	Insulin-like growth factor-binding protein 5		0	1.47847	8	8	8	29.9	29.9	29.9	30.372	0	18.819	83969000	17	NaN	NaN	21.4604	22.3511	NaN	23.3441	23.4122	NaN	NaN	NaN	21.1635		Q07079	IBP5_MOUSE	Igfbp5	Insulin-like growth factor-binding protein 5
Q07113	MPRI_MOUSE	Igf2r	Cation-independent mannose-6-phosphate receptor		0.88466	0.129379	45	45	45	23.5	23.5	23.5	273.81	0	248.64	2298700000	405	25.7935	25.8482	26.1381	25.6533	25.6405	25.8874	25.9266	25.8145	25.8408	25.7707	25.7081		Q07113	MPRI_MOUSE	Igf2r	Cation-independent mannose-6-phosphate receptor
Q07417	ACADS_MOUSE	Acads	Short-chain specific acyl-CoA dehydrogenase, mitochondrial		0.181729	-0.0292669	21	21	21	60.4	60.4	60.4	44.889	0	304.54	5285500000	648	26.2872	26.3705	26.4406	26.5125	26.5679	26.6098	26.438	26.5622	26.4627	26.6046	26.5365		Q07417	ACADS_MOUSE	Acads	Short-chain specific acyl-CoA dehydrogenase, mitochondrial
Q07456	AMBP_MOUSE	Ambp	Protein AMBP		1.18733	-0.173039	9	9	9	27.2	27.2	27.2	39.029	0	107.02	374910000	83	25.1714	24.7614	24.8969	25.1036	25.0961	24.767	24.8562	25.1315	24.9779	25.1108	24.8126		Q07456	AMBP_MOUSE	Ambp	Protein AMBP
Q07797	LG3BP_MOUSE	Lgals3bp	Galectin-3-binding protein		0.115152	-0.122427	11	11	10	31.7	31.7	28.9	64.49	0	91.251	394180000	50	24.399	24.7327	NaN	24.3813	24.6552	23.9439	25.8596	25.0345	NaN	24.9159	25.2543		Q07797	LG3BP_MOUSE	Lgals3bp	Galectin-3-binding protein
A0A1B0GS13	A0A1B0GS13_MOUSE	Bax	Apoptosis regulator BAX (Fragment)		0.331324	0.174936	7	4	4	56.1	26.3	26.3	12.513	0.0002924	9.7161	148040000	33	21.6645	22.2769	22.2612	22.1752	21.669	22.2151	22.3366	21.8148	NaN	22.7513	22.4906		A0A1B0GS13	A0A1B0GS13_MOUSE	Bax	Apoptosis regulator BAX (Fragment)
Q08024	PEBB_MOUSE	Cbfb	Core-binding factor subunit beta		0	NaN	2	2	2	13.4	13.4	13.4	22.03	0.0015353	5.6269	29688000	4	NaN	NaN	NaN	NaN	NaN	NaN	NaN	NaN	NaN	NaN	NaN		Q08024	PEBB_MOUSE	Cbfb	Core-binding factor subunit beta
Q08091	CNN1_MOUSE	Cnn1	Calponin-1		3.55395	0.250258	21	21	21	76.8	76.8	76.8	33.355	0	323.31	15596000000	1076	28.2811	28.4853	28.4705	28.6457	28.2361	28.5445	28.4599	28.2104	28.3854	28.3036	28.2089		Q08091	CNN1_MOUSE	Cnn1	Calponin-1
Q08093	CNN2_MOUSE	Cnn2	Calponin-2		0.601369	0.284492	7	6	6	28.5	28.5	28.5	33.155	0	27.741	268060000	31	NaN	24.7374	24.4661	25.231	24.2368	24.2801	24.8312	24.4775	24.9214	23.9499	24.5375		Q08093	CNN2_MOUSE	Cnn2	Calponin-2
Q08288	LYAR_MOUSE	Lyar	Cell growth-regulating nucleolar protein		0.0409649	-0.0308069	8	8	8	26.8	26.8	26.8	43.735	0	35.005	105790000	39	21.1425	NaN	21.31	21.2645	21.2831	21.4362	21.3431	21.3382	22.3829	20.9602	21.1087		Q08288	LYAR_MOUSE	Lyar	Cell growth-regulating nucleolar protein
Q08481	PECA1_MOUSE	Pecam1	Platelet endothelial cell adhesion molecule		0	0.317645	3	3	3	6.7	6.7	6.7	81.262	0.00055617	7.9698	35292000	11	NaN	21.8199	NaN	21.5579	21.3712	NaN	NaN	NaN	NaN	NaN	NaN		Q08481	PECA1_MOUSE	Pecam1	Platelet endothelial cell adhesion molecule
Q08857	CD36_MOUSE	Cd36	Platelet glycoprotein 4		0.406319	-0.136163	14	14	14	30.3	30.3	30.3	52.697	0	323.31	22443000000	960	29.6961	29.4316	29.6558	29.3667	29.8805	29.991	29.4452	29.9566	29.7345	29.7656	29.252		Q08857	CD36_MOUSE	Cd36	Platelet glycoprotein 4
A2AW05	A2AW05_MOUSE	Ssrp1	FACT complex subunit SSRP1 (Fragment)		0	NaN	3	3	3	5.9	5.9	5.9	71.527	0.0037568	4.0001	11259000	9	NaN	22.1728	NaN	21.6214	NaN	NaN	NaN	NaN	NaN	NaN	NaN		A2AW05	A2AW05_MOUSE	Ssrp1	FACT complex subunit SSRP1 (Fragment)
Q08ED0	B2L15_MOUSE	Bcl2l15	Bcl-2-like protein 15		0.297001	-0.0978806	8	8	8	51.5	51.5	51.5	18.299	0	301.58	1079700000	163	25.5893	25.1228	25.2225	25.4209	25.7116	25.0788	25.5123	25.3106	24.9705	25.393	25.241		Q08ED0	B2L15_MOUSE	Bcl2l15	Bcl-2-like protein 15
F8WH69	F8WH69_MOUSE	Ncf1	Neutrophil cytosol factor 1		0	0.972311	3	3	3	9.7	9.7	9.7	46.015	0.0060729	3.4114	52495000	7	22.1117	NaN	NaN	NaN	NaN	NaN	23.084	NaN	NaN	NaN	NaN		F8WH69	F8WH69_MOUSE	Ncf1	Neutrophil cytosol factor 1
Q09200	B4GN1_MOUSE	B4galnt1	Beta-1,4 N-acetylgalactosaminyltransferase 1		1.25346	0.158679	17	17	17	38.1	38.1	38.1	59.211	0	59.75	1235200000	206	25.5341	25.5273	25.6603	25.4618	25.2619	25.4967	25.7921	25.4308	25.5361	25.3745	25.4364		Q09200	B4GN1_MOUSE	B4galnt1	Beta-1,4 N-acetylgalactosaminyltransferase 1
Q0P678	ZCH18_MOUSE	Zc3h18	Zinc finger CCCH domain-containing protein 18		0	NaN	3	3	3	7.3	7.3	7.3	105.69	0.00029351	9.8774	29339000	13	NaN	NaN	NaN	NaN	NaN	NaN	NaN	NaN	NaN	NaN	NaN		Q0P678	ZCH18_MOUSE	Zc3h18	Zinc finger CCCH domain-containing protein 18
A0A0R4J0U2	A0A0R4J0U2_MOUSE	Ppp4r2	Serine/threonine-protein phosphatase 4 regulatory subunit 2		0.0657683	-0.0200016	7	7	7	24.9	24.9	24.9	46.448	0	27.866	111440000	40	21.8591	21.6149	NaN	21.7322	21.6601	21.9028	21.7127	21.5812	22.0454	21.5536	21.8645		A0A0R4J0U2	A0A0R4J0U2_MOUSE	Ppp4r2	Serine/threonine-protein phosphatase 4 regulatory subunit 2
E9QAF9	E9QAF9_MOUSE	Tanc1	Protein TANC1		0	0.0863004	6	6	6	5.7	5.7	5.7	200.06	0.00030312	11.136	48905000	26	NaN	22.0303	22.0302	21.9079	NaN	21.9123	NaN	21.8839	NaN	NaN	NaN		E9QAF9	E9QAF9_MOUSE	Tanc1	Protein TANC1
Q11011	PSA_MOUSE	Npepps	Puromycin-sensitive aminopeptidase		0.952493	0.1397	44	44	44	55.7	55.7	55.7	103.32	0	323.31	6431100000	765	26.4347	26.579	26.5803	26.674	26.3015	26.3022	26.5047	26.21	26.4905	26.3545	26.5389		Q11011	PSA_MOUSE	Npepps	Puromycin-sensitive aminopeptidase
Q11127	FUT4_MOUSE	Fut4	Alpha-(1,3)-fucosyltransferase 4		0.420309	-0.180766	8	8	8	29.3	29.3	29.3	49.481	0	25.602	314050000	71	24.5134	23.582	24.6546	24.0014	24.4008	24.0184	24.3171	24.0264	23.9837	24.5675	24.2811		Q11127	FUT4_MOUSE	Fut4	Alpha-(1,3)-fucosyltransferase 4
Q11136	PEPD_MOUSE	Pepd	Xaa-Pro dipeptidase		0.510026	-0.146162	17	17	17	40.2	40.2	40.2	55.028	0	178.33	1360800000	220	26.0076	26.2761	26.0226	26.065	26.1316	25.5919	26.1714	26.1014	26.5258	26.2194	26.0437		Q11136	PEPD_MOUSE	Pepd	Xaa-Pro dipeptidase
E9QM90	E9QM90_MOUSE	Relch	RAB11-binding protein RELCH		0.437422	0.182276	31	31	1	34	34	0.8	134.57	0	105.86	1180500000	222	25.7251	25.9251	25.8838	25.5822	25.5587	25.2582	25.7174	25.643	25.243	24.9184	25.8582		E9QM90	E9QM90_MOUSE	Relch	RAB11-binding protein RELCH
Q14AE4	WFDC3_MOUSE	Wfdc3	WAP four-disulfide core domain protein 3		0.0329985	-0.0192863	4	4	4	53.8	53.8	53.8	13.718	0	53.013	1106800000	74	28.0898	28.3798	27.7528	27.9381	27.979	27.2845	27.7188	28.1256	27.5513	27.4563	27.8025		Q14AE4	WFDC3_MOUSE	Wfdc3	WAP four-disulfide core domain protein 3
Q14C51	PTCD3_MOUSE	Ptcd3	Pentatricopeptide repeat domain-containing protein 3, mitochondrial		0.286432	-0.180168	10	10	10	18.2	18.2	18.2	77.795	0	37.517	368060000	82	25.0669	25.5445	25.1196	25.8011	26.4469	25.7313	24.9462	25.5771	25.719	25.6458	25.1964		Q14C51	PTCD3_MOUSE	Ptcd3	Pentatricopeptide repeat domain-containing protein 3, mitochondrial
Q14CH1	MOCOS_MOUSE	Mocos	Molybdenum cofactor sulfurase		0.0956734	-0.0588282	11	11	11	19.1	19.1	19.1	95.012	0	21.018	186650000	39	23.1255	23.4039	NaN	23.7534	23.5032	23.9088	23.7499	24.1076	23.9453	24.2315	23.6639		Q14CH1	MOCOS_MOUSE	Mocos	Molybdenum cofactor sulfurase
Q14DH7	ACSS3_MOUSE	Acss3	Acyl-CoA synthetase short-chain family member 3, mitochondrial		0.127058	-0.0914219	5	5	5	12	12	12	74.517	0.00052882	6.5838	127040000	30	22.7621	23.287	NaN	23.1466	23.3083	23.3815	23.7131	23.7191	23.096	24.0567	23.8987		Q14DH7	ACSS3_MOUSE	Acss3	Acyl-CoA synthetase short-chain family member 3, mitochondrial
Q19LI2	A1BG_MOUSE	A1bg	Alpha-1B-glycoprotein		0.104964	-0.0976177	21	21	21	51.8	51.8	51.8	56.553	0	323.31	9716500000	581	27.1024	25.7658	26.6535	26.854	26.9068	27.253	25.649	26.3644	25.8188	26.5587	26.445		Q19LI2	A1BG_MOUSE	A1bg	Alpha-1B-glycoprotein
Q1ERP8	CLM9_MOUSE	Cd300lg	CMRF35-like molecule 9		0	NaN	2	2	2	11.8	11.8	11.8	36.756	0.0012827	5.7383	12808000	2	NaN	NaN	NaN	NaN	NaN	NaN	NaN	NaN	NaN	NaN	NaN		Q1ERP8	CLM9_MOUSE	Cd300lg	CMRF35-like molecule 9
H3BKN0	H3BKN0_MOUSE	Nsun2	NOL1/NOP2/Sun domain family member 2		0.420028	-0.118262	21	21	21	43.1	43.1	43.1	81.373	0	94.271	866230000	136	25.6154	25.6622	25.3379	25.3675	25.674	25.878	25.7588	25.4786	26.0243	25.8189	25.7035		H3BKN0	H3BKN0_MOUSE	Nsun2	NOL1/NOP2/Sun domain family member 2
A0A571BEK8	A0A571BEK8_MOUSE	Slc35f3	Putative thiamine transporter SLC35F3		0.438192	-0.225568	2	2	2	6.1	6.1	6.1	54.974	0.0072928	3.1914	370150000	23	25.6932	NaN	25.7924	25.2379	NaN	NaN	NaN	NaN	25.7196	25.8095	NaN		A0A571BEK8	A0A571BEK8_MOUSE	Slc35f3	Putative thiamine transporter SLC35F3
Q2EMV9	PAR14_MOUSE	Parp14	Protein mono-ADP-ribosyltransferase PARP14		0	0.484503	13	13	13	9.6	9.6	9.6	203.8	0	21.301	176430000	24	NaN	NaN	NaN	NaN	NaN	NaN	24.1349	23.6504	NaN	NaN	NaN		Q2EMV9	PAR14_MOUSE	Parp14	Protein mono-ADP-ribosyltransferase PARP14
B7ZNP0	B7ZNP0_MOUSE	Edem3	alpha-1,2-Mannosidase		0	NaN	3	3	3	4.2	4.2	4.2	102.22	0.00053967	7.0712	42360000	15	NaN	NaN	NaN	NaN	NaN	NaN	NaN	NaN	NaN	NaN	NaN		B7ZNP0	B7ZNP0_MOUSE	Edem3	alpha-1,2-Mannosidase
D3Z7E5	D3Z7E5_MOUSE	Gsk3a	[Tau protein] kinase		0.166786	-0.0705438	6	5	5	20.8	17.7	17.7	51.245	0	28.407	306330000	61	25.5524	25.1357	25.5685	25.6098	25.1333	25.0463	24.7326	25.2087	25.1563	25.2872	25.3969		D3Z7E5	D3Z7E5_MOUSE	Gsk3a	[Tau protein] kinase
Q2TBE6	P4K2A_MOUSE	Pi4k2a	Phosphatidylinositol 4-kinase type 2-alpha		1.03964	0.339389	5	5	5	21.3	21.3	21.3	54.257	0	21.018	132670000	28	24.9493	25.2904	24.6504	24.95	NaN	NaN	25.0791	NaN	24.5884	24.6034	24.4714		Q2TBE6	P4K2A_MOUSE	Pi4k2a	Phosphatidylinositol 4-kinase type 2-alpha
Q2TPA8	HSDL2_MOUSE	Hsdl2	Hydroxysteroid dehydrogenase-like protein 2		0.210751	0.0601959	15	15	15	42.2	42.2	42.2	54.208	0	75.077	992390000	160	25.6975	25.7708	25.8804	25.8937	25.6186	26.2549	25.8839	25.9586	25.8923	26.1668	25.9255		Q2TPA8	HSDL2_MOUSE	Hsdl2	Hydroxysteroid dehydrogenase-like protein 2
Q2VLH6	C163A_MOUSE	Cd163	Scavenger receptor cysteine-rich type 1 protein M130		0.229466	0.164451	3	3	3	3.2	3.2	3.2	120.92	0.00028571	8.966	99781000	22	21.7054	21.6968	22.3592	22.3856	NaN	21.8206	NaN	NaN	NaN	21.6407	22.3572		Q2VLH6	C163A_MOUSE	Cd163	Scavenger receptor cysteine-rich type 1 protein M130
Q31125	S39A7_MOUSE	Slc39a7	Zinc transporter SLC39A7		0.514605	-0.16534	6	6	6	19.5	19.5	19.5	50.656	0	190.39	1193900000	142	26.5109	25.7568	26.5581	26.1274	26.369	26.3873	26.5838	26.474	26.2137	26.5562	26.5643		Q31125	S39A7_MOUSE	Slc39a7	Zinc transporter SLC39A7
Q3B7Z2	OSBP1_MOUSE	Osbp	Oxysterol-binding protein 1		0.161716	0.0274151	26	26	26	43	43	43	88.796	0	323.31	1880500000	326	24.8629	25.0671	24.793	24.7845	24.8647	24.7417	24.7109	24.6943	24.7243	24.769	24.8368		Q3B7Z2	OSBP1_MOUSE	Osbp	Oxysterol-binding protein 1
A0A0R4J1H0	A0A0R4J1H0_MOUSE	Marchf5	E3 ubiquitin-protein ligase MARCHF5		0.935827	-0.309364	4	4	4	21.7	21.7	21.7	27.363	0.00027949	8.1687	70177000	27	NaN	22.7066	22.6227	22.6439	22.6648	22.4218	22.9747	23.0778	NaN	NaN	23.2073		A0A0R4J1H0	A0A0R4J1H0_MOUSE	Marchf5	E3 ubiquitin-protein ligase MARCHF5
Q3SXD3	HDDC2_MOUSE	Hddc2	5-deoxynucleotidase HDDC2		0.624462	0.190422	7	7	7	49.7	49.7	49.7	22.753	0	18.362	608350000	111	23.713	24.0467	24.0556	23.731	23.6494	23.9032	23.5556	24.0504	23.1984	23.7111	23.6855		Q3SXD3	HDDC2_MOUSE	Hddc2	5-deoxynucleotidase HDDC2
Q3T9E4	TGTP2_MOUSE	Tgtp2	T-cell-specific guanine nucleotide triphosphate-binding protein 2		0	NaN	2	2	2	7.2	7.2	7.2	47.12	0.0016888	4.4607	12141000	3	NaN	NaN	NaN	NaN	NaN	NaN	NaN	NaN	NaN	NaN	NaN		Q3T9E4	TGTP2_MOUSE	Tgtp2	T-cell-specific guanine nucleotide triphosphate-binding protein 2
E0CYA8	E0CYA8_MOUSE	Tmem120b	Transmembrane protein 120B		0.201328	-0.0973679	5	5	5	61.5	61.5	61.5	12.963	0	32.23	130200000	41	22.1418	22.3582	22.4653	NaN	22.4846	NaN	NaN	22.3328	22.806	22.7717	22.5177		E0CYA8	E0CYA8_MOUSE	Tmem120b	Transmembrane protein 120B
A0A0X1KG67	A0A0X1KG67_MOUSE	Emc10	ER membrane protein complex subunit 10		0	NaN	4	4	4	11.2	11.2	11.2	28.187	0	26.607	59480000	15	NaN	NaN	NaN	NaN	23.74	NaN	NaN	23.825	NaN	24.3389	NaN		A0A0X1KG67	A0A0X1KG67_MOUSE	Emc10	ER membrane protein complex subunit 10
Q3TB82	PKHF1_MOUSE	Plekhf1	Pleckstrin homology domain-containing family F member 1		0.0549172	0.0215569	4	4	4	23.3	23.3	23.3	31.157	0	32.256	274960000	54	23.4509	23.031	23.1063	22.9918	23.268	23.2862	23.3835	22.6369	23.1863	23.1249	23.1623		Q3TB82	PKHF1_MOUSE	Plekhf1	Pleckstrin homology domain-containing family F member 1
Q3TBT3	STING_MOUSE	Sting1	Stimulator of interferon genes protein		1.16163	0.285015	13	13	13	40.2	40.2	40.2	42.829	0	193.24	482960000	191	24.7168	25.1418	24.979	25.0228	24.7213	25.1727	24.9538	24.2588	24.8487	25.1262	24.9421		Q3TBT3	STING_MOUSE	Sting1	Stimulator of interferon genes protein
Q3TBW2	RM10_MOUSE	Mrpl10	39S ribosomal protein L10, mitochondrial		1.47585	0.354178	4	4	4	27.5	27.5	27.5	29.395	0	39.757	151910000	54	24.3106	24.8968	24.7336	24.5855	24.2664	24.5854	24.7321	24.7526	23.8724	24.4823	24.4304		Q3TBW2	RM10_MOUSE	Mrpl10	39S ribosomal protein L10, mitochondrial
Q3TC33	CC127_MOUSE	Ccdc127	Coiled-coil domain-containing protein 127		0	NaN	3	3	3	11.9	11.9	11.9	30.509	0	14.661	42785000	14	NaN	NaN	NaN	NaN	NaN	NaN	NaN	NaN	NaN	NaN	NaN		Q3TC33	CC127_MOUSE	Ccdc127	Coiled-coil domain-containing protein 127
Q3TCH7	CUL4A_MOUSE	Cul4a	Cullin-4A		0.116988	-0.0183609	16	16	10	27.4	27.4	18.3	87.752	0	73.174	487230000	114	24.0957	24.269	24.1978	24.0683	24.2345	24.0714	24.1345	24.0312	24.1286	24.1775	24.3316		Q3TCH7	CUL4A_MOUSE	Cul4a	Cullin-4A
Z4YJY0	Z4YJY0_MOUSE	Abraxas2	BRISC complex subunit Abraxas 2		0.520385	0.14889	11	11	11	37	37	37	47.932	0	30.955	200760000	56	22.6116	22.3653	22.8111	22.4167	22.3967	22.3293	22.6306	22.1858	21.9881	22.5852	22.4028		Z4YJY0	Z4YJY0_MOUSE	Abraxas2	BRISC complex subunit Abraxas 2
Q3TCN2	PLBL2_MOUSE	Plbd2	Putative phospholipase B-like 2		0.00267995	0.00170485	3	3	3	7.1	7.1	7.1	66.289	0.0014638	4.7075	35102000	14	22.6562	NaN	22.889	NaN	NaN	NaN	22.9444	22.8904	NaN	NaN	23.1983		Q3TCN2	PLBL2_MOUSE	Plbd2	Putative phospholipase B-like 2
Q3TDD9	PPR21_MOUSE	Ppp1r21	Protein phosphatase 1 regulatory subunit 21		0	NaN	5	5	5	6.9	6.9	6.9	88.337	0.0015267	5.5301	29979000	8	NaN	NaN	NaN	NaN	NaN	NaN	NaN	NaN	NaN	NaN	NaN		Q3TDD9	PPR21_MOUSE	Ppp1r21	Protein phosphatase 1 regulatory subunit 21
Q3TDN2	FAF2_MOUSE	Faf2	FAS-associated factor 2		0.897358	0.156882	10	10	10	32.6	32.6	32.6	52.471	0	114.81	362200000	107	23.8644	23.6786	24.0319	24.0242	23.5892	24.0886	23.9187	23.6611	23.9708	23.7662	23.8974		Q3TDN2	FAF2_MOUSE	Faf2	FAS-associated factor 2
A0A0R4J0D3	A0A0R4J0D3_MOUSE	Stt3b	Dolichyl-diphosphooligosaccharide--protein glycotransferase		0.807181	-0.126563	13	12	12	16.8	15.9	15.9	93.314	0	125.84	1426700000	286	25.5982	25.8408	25.7093	25.5985	25.8509	25.44	25.6063	25.7387	25.7958	25.9389	25.6706		A0A0R4J0D3	A0A0R4J0D3_MOUSE	Stt3b	Dolichyl-diphosphooligosaccharide--protein glycotransferase
Z4YKB8	Z4YKB8_MOUSE	Hp1bp3	Heterochromatin protein 1-binding protein 3		0.651852	0.22713	4	4	4	9	9	9	60.85	0.00028289	8.6231	91070000	22	23.356	23.3425	23.0866	23.3994	NaN	23.8924	23.3485	22.9333	23.2863	NaN	23.1713		Z4YKB8	Z4YKB8_MOUSE	Hp1bp3	Heterochromatin protein 1-binding protein 3
Q3UBW1	Q3UBW1_MOUSE	Spryd7	SPRY domain-containing protein 7		1.94414	0.567424	2	2	2	16.6	16.6	16.6	17.987	0.0014738	4.831	69897000	19	NaN	23.6076	NaN	23.4203	NaN	23.423	23.6034	NaN	NaN	23.1097	22.7827		Q3UBW1	Q3UBW1_MOUSE	Spryd7	SPRY domain-containing protein 7
Q3TGF2	F107B_MOUSE	Fam107b	Protein FAM107B		0.200827	0.134454	2	2	2	19.8	19.8	19.8	15.572	0	44.41	56782000	30	21.9901	NaN	NaN	21.7446	21.2798	NaN	22.0959	21.655	21.9007	NaN	22.1032		Q3TGF2	F107B_MOUSE	Fam107b	Protein FAM107B
Q3THE2	ML12B_MOUSE	Myl12b	Myosin regulatory light chain 12B		0.0807339	-0.0399814	15	6	0	54.7	21.5	0	19.779	0	294.38	2013300000	340	25.6114	25.6625	25.3102	25.5374	25.9999	25.2611	25.4277	24.9303	25.7101	25.3265	25.3003		Q3THE2	ML12B_MOUSE	Myl12b	Myosin regulatory light chain 12B
Q3THG9	AASD1_MOUSE	Aarsd1	Alanyl-tRNA editing protein Aarsd1		0.114386	0.0189405	13	13	13	41.5	41.5	41.5	44.97	0	121.07	596390000	107	24.5999	24.7039	24.5573	24.6257	24.6281	24.8635	24.7806	24.8137	24.7655	24.688	24.6286		Q3THG9	AASD1_MOUSE	Aarsd1	Alanyl-tRNA editing protein Aarsd1
Q3THJ3	EIF1A_MOUSE	Eif1ad	Probable RNA-binding protein EIF1AD		0	0.0703971	3	3	3	26.5	26.5	26.5	19.52	0.0015318	5.5867	49054000	11	NaN	21.3778	NaN	21.056	NaN	21.537	NaN	21.2532	NaN	NaN	NaN		Q3THJ3	EIF1A_MOUSE	Eif1ad	Probable RNA-binding protein EIF1AD
Q3THK3	T2FA_MOUSE	Gtf2f1	General transcription factor IIF subunit 1		0.813102	-0.299481	8	8	8	27.2	27.2	27.2	57.241	0	25.674	122100000	36	23.8314	23.1843	23.2716	23.0507	23.2711	23.8764	NaN	23.4892	23.9298	23.7517	23.5981		Q3THK3	T2FA_MOUSE	Gtf2f1	General transcription factor IIF subunit 1
Q3THK7	GUAA_MOUSE	Gmps	GMP synthase [glutamine-hydrolyzing]		0.0408155	0.00952269	28	28	28	52.5	52.5	52.5	76.723	0	196.62	1802000000	313	25.8077	25.9996	25.7911	25.5583	25.6963	25.848	25.8541	25.7707	25.948	25.6703	25.9112		Q3THK7	GUAA_MOUSE	Gmps	GMP synthase [glutamine-hydrolyzing]
Q3THS6	METK2_MOUSE	Mat2a	S-adenosylmethionine synthase isoform type-2		1.03964	0.0944277	18	18	18	55.9	55.9	55.9	43.688	0	323.31	3271800000	394	26.5645	26.4808	26.5979	26.4743	26.4079	26.5735	26.6768	26.4458	26.3993	26.5714	26.4085		Q3THS6	METK2_MOUSE	Mat2a	S-adenosylmethionine synthase isoform type-2
Q3TIR1	TPC13_MOUSE	Trappc13	Trafficking protein particle complex subunit 13		1.12926	-0.355018	3	3	3	10.1	10.1	10.1	46.476	0	16.369	49057000	17	21.9741	21.5609	NaN	21.8098	NaN	NaN	21.4679	21.9617	NaN	NaN	NaN		Q3TIR1	TPC13_MOUSE	Trappc13	Trafficking protein particle complex subunit 13
Q3TIR3	RIC8A_MOUSE	Ric8a	Synembryn-A		0.450641	0.139571	10	10	10	25.8	25.8	25.8	59.846	0	30.6	125180000	74	24.2424	24.2776	24.1179	24.1902	23.8202	24.2243	23.7595	23.7861	24.3402	23.9369	23.7203		Q3TIR3	RIC8A_MOUSE	Ric8a	Synembryn-A
Q3TIU4	PDE12_MOUSE	Pde12	2,5-phosphodiesterase 12		1.54218	0.145527	13	13	13	32.7	32.7	32.7	67.513	0	33.073	310770000	74	23.0389	23.0821	23.1351	23.0822	22.7736	23.0832	23.1642	22.8615	23.0594	22.9921	23.0575		Q3TIU4	PDE12_MOUSE	Pde12	2,5-phosphodiesterase 12
Q3TIV5	ZC3HF_MOUSE	Zc3h15	Zinc finger CCCH domain-containing protein 15		0.0900963	-0.0234488	8	8	8	21.1	21.1	21.1	48.327	0	48.886	229610000	108	24.3754	24.2298	24.1541	24.3159	24.436	24.2585	24.0728	24.3375	24.0926	23.9193	24.2171		Q3TIV5	ZC3HF_MOUSE	Zc3h15	Zinc finger CCCH domain-containing protein 15
Q3TJ91	L2GL2_MOUSE	Llgl2	LLGL scribble cell polarity complex component 2		0.436116	0.158784	11	11	11	17.3	17.3	17.3	114.32	0	40.048	249530000	77	24.2778	24.1609	24.3317	23.7733	23.6917	24.6856	24.3361	24.2792	24.0935	24.2074	24.0429		Q3TJ91	L2GL2_MOUSE	Llgl2	LLGL scribble cell polarity complex component 2
Q3TJD7	PDLI7_MOUSE	Pdlim7	PDZ and LIM domain protein 7		0.753245	0.146661	11	11	11	25.6	25.6	25.6	50.118	0	65.301	464710000	114	25.1423	25.2504	25.203	24.9432	24.9361	25.3878	25.331	24.9461	25.0769	25.3593	24.9978		Q3TJD7	PDLI7_MOUSE	Pdlim7	PDZ and LIM domain protein 7
Q3TJZ6	FA98A_MOUSE	Fam98a	Protein FAM98A		0.103085	0.0223016	15	15	13	46.4	46.4	40	55.055	0	305.62	1676800000	320	25.9549	25.8577	26.1472	25.9112	25.9718	26.095	25.911	25.7968	26.2005	25.8633	25.9855		Q3TJZ6	FA98A_MOUSE	Fam98a	Protein FAM98A
A0A0R4J170	A0A0R4J170_MOUSE	Smarca4	Transcription activator BRG1		0.178415	0.157563	5	5	4	3.7	3.7	2.9	181.85	0.00027863	8.0767	67350000	27	22.2521	NaN	22.162	22.6298	22.0483	23.2067	22.9933	NaN	22.6426	23.4975	22.5114		A0A0R4J170	A0A0R4J170_MOUSE	Smarca4	Transcription activator BRG1
Q3TL44	NLRX1_MOUSE	Nlrx1	NLR family member X1		1.10304	0.209951	16	16	16	20.5	20.5	20.5	107.83	0	46.923	766890000	130	25.9313	25.8998	26.1401	26.243	25.7918	26.3533	25.9285	26.1542	25.8641	25.9697	25.7068		Q3TL44	NLRX1_MOUSE	Nlrx1	NLR family member X1
S4R294	S4R294_MOUSE	Prrc2c	Protein PRRC2C		0.429304	0.0867184	19	19	19	10.5	10.5	10.5	298.11	0	68.877	702130000	143	24.1135	24.1436	24.1784	23.9561	23.6587	24.1436	24.1132	24.1108	24.0788	23.9785	24.1811		S4R294	S4R294_MOUSE	Prrc2c	Protein PRRC2C
F8VQF9	F8VQF9_MOUSE	Trappc10	Trafficking protein particle complex subunit 10		0	NaN	4	4	4	5	5	5	141.49	0.0041657	3.7966	31005000	8	NaN	NaN	NaN	NaN	NaN	NaN	NaN	NaN	NaN	NaN	NaN		F8VQF9	F8VQF9_MOUSE	Trappc10	Trafficking protein particle complex subunit 10
Q3TLP5	ECHD2_MOUSE	Echdc2	Enoyl-CoA hydratase domain-containing protein 2, mitochondrial		0.155944	0.0588216	9	9	9	45.3	45.3	45.3	31.852	0	222.77	655900000	114	24.9729	25.0264	25.5285	25.3695	25.3045	24.7503	25.0935	25.2983	24.97	24.8873	25.136		Q3TLP5	ECHD2_MOUSE	Echdc2	Enoyl-CoA hydratase domain-containing protein 2, mitochondrial
Q3TLS3	GDPP1_MOUSE	Gdpgp1	GDP-D-glucose phosphorylase 1		0.0721446	-0.0437194	8	8	8	28.2	28.2	28.2	42.514	0	16.625	249210000	63	25.4058	25.5822	25.6111	25.3736	25.7318	24.816	24.9554	25.3608	24.9911	24.7779	25.6009		Q3TLS3	GDPP1_MOUSE	Gdpgp1	GDP-D-glucose phosphorylase 1
Q3TMH2	SCRN3_MOUSE	Scrn3	Secernin-3		0.448473	-0.462285	4	4	4	14.6	14.6	14.6	47.661	0.0014859	4.958	80703000	23	24.1305	24.4912	NaN	23.827	25.0559	23.4871	NaN	24.0057	NaN	NaN	NaN		Q3TMH2	SCRN3_MOUSE	Scrn3	Secernin-3
Q3TMX7	QSOX2_MOUSE	Qsox2	Sulfhydryl oxidase 2		0.365317	0.212115	6	6	6	11.1	11.1	11.1	77.774	0	12.568	170270000	48	23.5698	23.2989	24.5234	24.0617	23.932	23.328	23.6791	23.5953	23.273	23.4605	NaN		Q3TMX7	QSOX2_MOUSE	Qsox2	Sulfhydryl oxidase 2
Q3TN34	MILK2_MOUSE	Micall2	MICAL-like protein 2		0.00609222	0.0063467	7	7	6	10.8	10.8	9.7	108.29	0	18.134	84102000	19	NaN	23.3169	22.6228	22.5458	NaN	23.1971	NaN	23.1971	NaN	NaN	22.6315		Q3TN34	MILK2_MOUSE	Micall2	MICAL-like protein 2
Q3TPE9	ANKY2_MOUSE	Ankmy2	Ankyrin repeat and MYND domain-containing protein 2		0.538178	0.275134	3	3	3	6.8	6.8	6.8	48.774	0.0056446	3.4512	79011000	19	22.5219	23.0134	NaN	22.8589	22.8543	22.5683	23.2765	NaN	NaN	22.2014	23.039		Q3TPE9	ANKY2_MOUSE	Ankmy2	Ankyrin repeat and MYND domain-containing protein 2
Q3TPX4	EXOC5_MOUSE	Exoc5	Exocyst complex component 5		0.551613	-0.152573	7	7	7	13.4	13.4	13.4	81.737	0.00028441	8.7761	138600000	23	23.8232	23.8125	23.646	23.6738	23.8914	24.1595	NaN	23.8778	NaN	24.178	24.1073		Q3TPX4	EXOC5_MOUSE	Exoc5	Exocyst complex component 5
A0A140LHU9	A0A140LHU9_MOUSE	Pnpla6	Patatin-like phospholipase domain-containing protein 6		0.612665	-0.195101	5	5	5	5.5	5.5	5.5	145.23	0	43.008	121030000	24	24.0931	24.3884	23.8935	23.9395	24.4906	24.397	24.2648	24.1357	NaN	24.6641	24.4752		A0A140LHU9	A0A140LHU9_MOUSE	Pnpla6	Patatin-like phospholipase domain-containing protein 6
E9Q3Z4	E9Q3Z4_MOUSE	Hk3	Hexokinase		0	NaN	6	4	4	9.1	6.1	6.1	94.23	0.0014577	4.6363	17482000	8	NaN	NaN	NaN	NaN	NaN	NaN	NaN	NaN	NaN	NaN	NaN		E9Q3Z4	E9Q3Z4_MOUSE	Hk3	Hexokinase
G5E881	G5E881_MOUSE	Tamm41	Phosphatidate cytidylyltransferase, mitochondrial		0.279394	-0.267777	3	3	3	8	8	8	37.896	0.0010373	6.0238	53316000	22	NaN	NaN	23.7391	23.2643	23.6465	24.4803	23.7634	23.9181	NaN	24.6741	NaN		G5E881	G5E881_MOUSE	Tamm41	Phosphatidate cytidylyltransferase, mitochondrial
Q3TVI8	PBIP1_MOUSE	Pbxip1	Pre-B-cell leukemia transcription factor-interacting protein 1		0.0811707	0.0571836	5	5	5	8.8	8.8	8.8	81.163	0.00055432	7.8888	41049000	18	21.6675	NaN	21.3587	NaN	21.0195	21.4445	21.3988	NaN	NaN	NaN	NaN		Q3TVI8	PBIP1_MOUSE	Pbxip1	Pre-B-cell leukemia transcription factor-interacting protein 1
Q3TW96	UAP1L_MOUSE	Uap1l1	UDP-N-acetylhexosamine pyrophosphorylase-like protein 1		0.208484	0.0515117	29	29	27	61.5	61.5	57.6	56.613	0	273.23	4199700000	573	27.2241	27.1967	27.4252	27.2175	27.2628	27.208	27.1153	27.429	27.0828	26.8502	27.2371		Q3TW96	UAP1L_MOUSE	Uap1l1	UDP-N-acetylhexosamine pyrophosphorylase-like protein 1
F8WHW3	F8WHW3_MOUSE	Pip4p1	Phosphatidylinositol-4,5-bisphosphate 4-phosphatase		0	-0.121095	2	2	2	12.3	12.3	12.3	29.331	0.00054304	7.3056	127460000	23	23.2716	NaN	NaN	23.1703	22.8583	NaN	NaN	23.2816	23.4095	23.9913	22.9363		F8WHW3	F8WHW3_MOUSE	Pip4p1	Phosphatidylinositol-4,5-bisphosphate 4-phosphatase
Q3TWW8	SRSF6_MOUSE	Srsf6	Serine/arginine-rich splicing factor 6		0.194946	0.12818	7	7	6	19.8	19.8	17.1	39.025	0	12.62	869300000	96	25.1058	24.9939	24.9054	24.7854	23.9902	25.4937	25.4653	25.1563	25.326	25.3142	25.111		Q3TWW8	SRSF6_MOUSE	Srsf6	Serine/arginine-rich splicing factor 6
Q3TXS7	PSMD1_MOUSE	Psmd1	26S proteasome non-ATPase regulatory subunit 1		0.472146	0.0654123	42	42	42	61.7	61.7	61.7	105.73	0	323.31	7329200000	968	27.3449	27.4849	27.4564	27.3842	27.3962	27.2622	27.2999	27.2476	27.2282	27.1774	27.4782		Q3TXS7	PSMD1_MOUSE	Psmd1	26S proteasome non-ATPase regulatory subunit 1
Z4YLT1	Z4YLT1_MOUSE	Inip	SOSS complex subunit C (Fragment)		0	NaN	2	2	2	65.3	65.3	65.3	7.8616	0.0056638	3.4936	9315500	5	NaN	NaN	NaN	NaN	NaN	NaN	NaN	NaN	NaN	NaN	NaN		Z4YLT1	Z4YLT1_MOUSE	Inip	SOSS complex subunit C (Fragment)
Q3TYS2	CYBC1_MOUSE	Cybc1	Cytochrome b-245 chaperone 1		0.349145	0.213345	6	6	6	29.4	29.4	29.4	20.921	0	15.476	314070000	71	25.5325	25.2176	25.4826	25.9641	25.0757	26.4278	25.872	25.3157	26.0684	26.1218	25.3628		Q3TYS2	CYBC1_MOUSE	Cybc1	Cytochrome b-245 chaperone 1
Q3TYX3	SMYD5_MOUSE	Smyd5	SET and MYND domain-containing protein 5		0.202244	0.0678218	7	7	7	24.5	24.5	24.5	47.095	0	27.448	288620000	64	24.6778	24.7521	24.3487	24.663	24.8156	24.7168	25.0056	24.3795	24.749	24.3453	24.8093		Q3TYX3	SMYD5_MOUSE	Smyd5	SET and MYND domain-containing protein 5
Q3TZM9	ALG11_MOUSE	Alg11	GDP-Man:Man(3)GlcNAc(2)-PP-Dol alpha-1,2-mannosyltransferase		0.118608	-0.0745866	11	11	11	29.1	29.1	29.1	55.269	0	27.42	414060000	92	25.5265	25.3708	25.7324	25.3912	25.2806	25.9335	25.4941	25.3451	26.1629	26.3623	25.2766		Q3TZM9	ALG11_MOUSE	Alg11	GDP-Man:Man(3)GlcNAc(2)-PP-Dol alpha-1,2-mannosyltransferase
Q3TZZ7	ESYT2_MOUSE	Esyt2	Extended synaptotagmin-2		0.970713	-0.104742	18	18	18	27.8	27.8	27.8	94.138	0	64.067	539730000	198	24.8921	24.8974	24.8514	24.7203	25.0831	24.8912	25.0048	24.8496	25.0017	25.058	24.9821		Q3TZZ7	ESYT2_MOUSE	Esyt2	Extended synaptotagmin-2
Q3U0B3	DHR11_MOUSE	Dhrs11	Dehydrogenase/reductase SDR family member 11		0.0959854	-0.0410622	5	5	5	30	30	30	28.274	0	16.199	290460000	66	23.8867	24.0746	24.1654	23.7463	23.6456	23.4644	23.9236	23.7557	24.3171	23.796	24.0944		Q3U0B3	DHR11_MOUSE	Dhrs11	Dehydrogenase/reductase SDR family member 11
D3YTU2	D3YTU2_MOUSE	Ogfod1	2-oxoglutarate and iron-dependent oxygenase domain-containing protein 1		0	NaN	4	4	4	15.5	15.5	15.5	61.159	0.00029317	9.7917	14706000	4	NaN	NaN	NaN	NaN	NaN	NaN	NaN	NaN	NaN	NaN	NaN		D3YTU2	D3YTU2_MOUSE	Ogfod1	2-oxoglutarate and iron-dependent oxygenase domain-containing protein 1
Q3U0M1	TPPC9_MOUSE	Trappc9	Trafficking protein particle complex subunit 9		0.700635	-0.212255	5	5	5	5.7	5.7	5.7	128.23	0.001286	5.802	68973000	17	23.3855	23.5306	23.3772	NaN	NaN	NaN	23.3846	NaN	23.7742	NaN	23.7694		Q3U0M1	TPPC9_MOUSE	Trappc9	Trafficking protein particle complex subunit 9
Q3U0S6	RAIN_MOUSE	Rasip1	Ras-interacting protein 1		1.25277	-0.21333	10	10	10	14.3	14.3	14.3	103.56	0	17.4	227040000	64	24.4659	24.324	24.143	24.5913	24.5766	24.3582	24.0709	24.405	24.4541	24.7145	24.4487		Q3U0S6	RAIN_MOUSE	Rasip1	Ras-interacting protein 1
A0A3B2WCD8	A0A3B2WCD8_MOUSE	Khsrp	Far upstream element-binding protein 2		0.0797155	-0.027376	24	24	22	41.6	41.6	39.4	74.252	0	199.44	3061900000	365	26.1369	25.9811	25.9752	25.9232	25.6479	26.2468	26.2528	26.0713	26.2962	26.2757	26.1913		A0A3B2WCD8	A0A3B2WCD8_MOUSE	Khsrp	Far upstream element-binding protein 2
Q3U0V2	TRADD_MOUSE	Tradd	Tumor necrosis factor receptor type 1-associated DEATH domain protein		0.192366	-0.0921275	3	3	3	14.5	14.5	14.5	34.577	0	20.74	38830000	21	21.7026	21.8709	NaN	NaN	NaN	21.4416	21.9094	22.0426	NaN	NaN	21.7532		Q3U0V2	TRADD_MOUSE	Tradd	Tumor necrosis factor receptor type 1-associated DEATH domain protein
Q3U186	SYRM_MOUSE	Rars2	Probable arginine--tRNA ligase, mitochondrial		0.315012	-0.144148	9	9	9	18.3	18.3	18.3	65.335	0	12.892	89941000	32	22.8872	23.1556	23.0976	NaN	23.423	22.3402	22.815	22.8824	23.19	22.7661	22.8288		Q3U186	SYRM_MOUSE	Rars2	Probable arginine--tRNA ligase, mitochondrial
Q3U1J4	DDB1_MOUSE	Ddb1	DNA damage-binding protein 1		1.54452	0.11709	45	45	45	44.2	44.2	44.2	126.85	0	187.46	6223800000	820	27.7824	27.8797	27.9675	27.7904	27.6467	27.894	27.7857	27.6688	27.799	27.8244	27.7568		Q3U1J4	DDB1_MOUSE	Ddb1	DNA damage-binding protein 1
Q3U1V6	UEVLD_MOUSE	Uevld	Ubiquitin-conjugating enzyme E2 variant 3		0.171887	0.112235	6	6	6	16.6	16.6	16.6	51.681	0.0005496	7.655	58670000	17	23.8588	NaN	23.9264	23.4554	NaN	23.7525	NaN	23.7447	NaN	NaN	23.1941		Q3U1V6	UEVLD_MOUSE	Uevld	Ubiquitin-conjugating enzyme E2 variant 3
Q3U276	SDHF1_MOUSE	Sdhaf1	Succinate dehydrogenase assembly factor 1, mitochondrial		0	NaN	1	1	1	12.7	12.7	12.7	13.142	0.0090811	2.9048	46860000	2	NaN	NaN	NaN	NaN	NaN	NaN	NaN	NaN	NaN	NaN	NaN		Q3U276	SDHF1_MOUSE	Sdhaf1	Succinate dehydrogenase assembly factor 1, mitochondrial
Q3U2C5	RN149_MOUSE	Rnf149	E3 ubiquitin-protein ligase RNF149		0	0.364202	4	4	4	15	15	15	42.552	0.00029797	10.498	52802000	15	NaN	23.3321	23.7507	NaN	NaN	23.1709	23.4102	NaN	NaN	NaN	23.0518		Q3U2C5	RN149_MOUSE	Rnf149	E3 ubiquitin-protein ligase RNF149
Q3U2I3	F16A2_MOUSE	Fam160a2	FTS and Hook-interacting protein		0.47667	-0.133217	21	21	21	32.3	32.3	32.3	106.54	0	81.252	368860000	110	24.2311	24.0424	24.3691	23.9389	24.3448	24.2255	23.929	24.4571	24.4485	24.0476	23.8762		Q3U2I3	F16A2_MOUSE	Fam160a2	FTS and Hook-interacting protein
Q3U2P1	SC24A_MOUSE	Sec24a	Protein transport protein Sec24A		0.210415	-0.0548566	31	31	30	32.6	32.6	31.8	118.78	0	196.43	1783200000	331	26.2403	26.3636	26.3824	26.28	26.5833	26.0189	26.2391	26.4056	26.2189	26.0205	26.4014		Q3U2P1	SC24A_MOUSE	Sec24a	Protein transport protein Sec24A
Q3U2V3	NUD18_MOUSE	Nudt18	8-oxo-dGDP phosphatase NUDT18		0	NaN	2	2	2	9	9	9	35.693	0.0035386	4.0756	12811000	10	NaN	21.9821	NaN	21.5845	NaN	NaN	NaN	NaN	NaN	NaN	NaN		Q3U2V3	NUD18_MOUSE	Nudt18	8-oxo-dGDP phosphatase NUDT18
Q3U308	CTU2_MOUSE	Ctu2	Cytoplasmic tRNA 2-thiolation protein 2		0	NaN	3	3	3	6.8	6.8	6.8	56.104	0.00053234	6.7497	23738000	7	NaN	NaN	NaN	NaN	NaN	NaN	NaN	NaN	NaN	NaN	NaN		Q3U308	CTU2_MOUSE	Ctu2	Cytoplasmic tRNA 2-thiolation protein 2
A0A0U1RPJ4	A0A0U1RPJ4_MOUSE	Rnf40	E3 ubiquitin protein ligase		0	NaN	3	3	3	4	4	4	102.38	0.00052549	6.4412	11831000	12	NaN	NaN	NaN	20.4844	NaN	20.4185	20.5183	NaN	NaN	NaN	NaN		A0A0U1RPJ4	A0A0U1RPJ4_MOUSE	Rnf40	E3 ubiquitin protein ligase
Z4YJR1	Z4YJR1_MOUSE	Lmf1	Lipase maturation factor		0.180229	-0.0384294	13	13	13	21.8	21.8	21.8	65.734	0	72.696	928810000	171	24.611	24.6541	24.5828	24.6341	24.7219	24.5959	24.4585	24.4663	24.8886	24.6463	24.407		Z4YJR1	Z4YJR1_MOUSE	Lmf1	Lipase maturation factor
Q3U487	HECD3_MOUSE	Hectd3	E3 ubiquitin-protein ligase HECTD3		0.903325	-0.343049	8	8	8	13.4	13.4	13.4	97.346	0.00055142	7.7518	658970000	20	26.1982	25.9085	NaN	25.6731	NaN	NaN	NaN	NaN	NaN	NaN	26.0695		Q3U487	HECD3_MOUSE	Hectd3	E3 ubiquitin-protein ligase HECTD3
Q3U5C8	ARHGG_MOUSE	Arhgef16	Rho guanine nucleotide exchange factor 16		1.07399	0.511224	6	6	6	12.2	12.2	12.2	80.38	0.00028736	9.2433	112790000	24	23.9801	24.7813	NaN	24.9783	23.8555	24.6635	23.8727	NaN	23.8167	24.1794	24.482		Q3U5C8	ARHGG_MOUSE	Arhgef16	Rho guanine nucleotide exchange factor 16
Q3U5F4	YRDC_MOUSE	Yrdc	YrdC domain-containing protein, mitochondrial		0.132722	0.0563114	5	5	5	24.6	24.6	24.6	29.454	0	37.962	153470000	52	24.2975	24.4193	24.6185	24.2666	24.2887	25.0361	24.1119	24.3824	24.4377	24.4628	24.7359		Q3U5F4	YRDC_MOUSE	Yrdc	YrdC domain-containing protein, mitochondrial
Q3U5Q7	CMPK2_MOUSE	Cmpk2	UMP-CMP kinase 2, mitochondrial		0.505298	0.214045	25	25	25	65.5	65.5	65.5	50.036	0	323.31	2354700000	360	25.6784	25.6556	25.7968	25.7712	25.6548	25.7979	26.8237	25.6771	25.8094	25.9261	25.7842		Q3U5Q7	CMPK2_MOUSE	Cmpk2	UMP-CMP kinase 2, mitochondrial
Q3U7R1	ESYT1_MOUSE	Esyt1	Extended synaptotagmin-1		0.64698	0.0959301	39	39	21	41.1	41.1	23.7	121.55	0	246.55	3259900000	616	26.2512	26.2187	26.2202	26.3773	26.1221	26.0739	26.3539	26.0974	26.2103	25.9537	26.2827		Q3U7R1	ESYT1_MOUSE	Esyt1	Extended synaptotagmin-1
Q3U7U3	FBX7_MOUSE	Fbxo7	F-box only protein 7		0.115318	-0.0736295	3	3	3	9.8	9.8	9.8	57.648	0.0010376	6.0255	87981000	17	NaN	24.6546	24.2194	24.8098	24.3107	24.625	NaN	NaN	NaN	25.0553	24.5865		Q3U7U3	FBX7_MOUSE	Fbxo7	F-box only protein 7
Q3U9G9	LBR_MOUSE	Lbr	Delta(14)-sterol reductase LBR		0.610876	-0.337256	7	7	7	13.7	13.7	13.7	71.439	0	49.69	432980000	38	24.0449	23.6031	23.4549	23.7569	24.6741	24.441	24.5344	24.6783	24.5492	24.1465	23.6788		Q3U9G9	LBR_MOUSE	Lbr	Delta(14)-sterol reductase LBR
Q3UD01	A7L3B_MOUSE	Atxn7l3b	Ataxin-7-like protein 3B		0	NaN	2	2	2	30.9	30.9	30.9	10.731	0	13.336	1766800	4	NaN	NaN	NaN	NaN	NaN	NaN	NaN	NaN	NaN	NaN	NaN		Q3UD01	A7L3B_MOUSE	Atxn7l3b	Ataxin-7-like protein 3B
Q3UDE2	TTL12_MOUSE	Ttll12	Tubulin--tyrosine ligase-like protein 12		0.356728	0.0950793	22	22	22	47.1	47.1	47.1	74.042	0	59.307	1287600000	293	25.2334	25.3642	25.4326	25.2201	25.3263	25.7854	25.6091	25.2313	25.6455	25.5478	25.3388		Q3UDE2	TTL12_MOUSE	Ttll12	Tubulin--tyrosine ligase-like protein 12
Q3UDR8	YIPF3_MOUSE	Yipf3	Protein YIPF3		0.113845	0.0352203	7	7	7	25.4	25.4	25.4	37.998	0	22.742	257840000	50	24.0987	23.9713	24.2008	23.7387	23.7999	24.2774	24.1655	24.1426	24.1309	NaN	24.0056		Q3UDR8	YIPF3_MOUSE	Yipf3	Protein YIPF3
Q3UDW8	HGNAT_MOUSE	Hgsnat	Heparan-alpha-glucosaminide N-acetyltransferase		0.313584	-0.0690692	5	5	5	8.5	8.5	8.5	72.503	0.0015091	5.328	115430000	25	22.7293	22.5068	NaN	22.6499	22.4645	22.53	22.6909	22.6308	22.8873	22.4756	22.7935		Q3UDW8	HGNAT_MOUSE	Hgsnat	Heparan-alpha-glucosaminide N-acetyltransferase
Q3UE37	UBE2Z_MOUSE	Ube2z	Ubiquitin-conjugating enzyme E2 Z		1.04763	0.208329	9	9	9	32	32	32	38.368	0	18.874	604270000	89	24.2557	24.1781	24.2838	24.2122	23.8587	24.1549	24.1384	23.6001	24.1409	23.9386	24.1169		Q3UE37	UBE2Z_MOUSE	Ube2z	Ubiquitin-conjugating enzyme E2 Z
Q3UEB3	PUF60_MOUSE	Puf60	Poly(U)-binding-splicing factor PUF60		0.110698	0.0377768	12	12	12	26.6	26.6	26.6	60.248	0	72.521	409370000	85	23.1722	23.4201	23.0452	23.2514	23.2605	23.1624	23.5791	23.0059	23.6363	23.2919	23.1562		Q3UEB3	PUF60_MOUSE	Puf60	Poly(U)-binding-splicing factor PUF60
E9QLB2	E9QLB2_MOUSE	Lyplal1	Lysophospholipase-like protein 1		0.0963379	0.0218493	8	8	8	51.9	51.9	51.9	26.34	0	65.625	780060000	94	26.6564	27.0224	26.8083	26.8557	27.0277	26.8087	26.8895	26.7544	27.0539	26.7159	26.9221		E9QLB2	E9QLB2_MOUSE	Lyplal1	Lysophospholipase-like protein 1
A0A0R4J146	A0A0R4J146_MOUSE	Nt5c3b	5-nucleotidase		0.525591	-0.232049	4	4	4	21.8	21.8	21.8	29.726	0.00055006	7.6713	84088000	31	22.8634	22.5855	NaN	22.2134	NaN	22.211	22.1141	22.7034	NaN	22.0655	22.4199		A0A0R4J146	A0A0R4J146_MOUSE	Nt5c3b	5-nucleotidase
Q3UFY8	TM10C_MOUSE	Trmt10c	tRNA methyltransferase 10 homolog C		0	NaN	2	2	2	8.5	8.5	8.5	48.385	0.0005401	7.0837	17681000	5	NaN	NaN	NaN	NaN	NaN	NaN	NaN	NaN	NaN	NaN	NaN		Q3UFY8	TM10C_MOUSE	Trmt10c	tRNA methyltransferase 10 homolog C
Q3UGC7	EI3JA_MOUSE	Eif3j1	Eukaryotic translation initiation factor 3 subunit J-A		1.38589	-0.11204	16	16	16	61.3	61.3	61.3	29.343	0	323.31	5248400000	552	26.5726	26.4274	26.6391	26.4811	26.6127	26.4495	26.4855	26.6678	26.7192	26.5451	26.5339		Q3UGC7	EI3JA_MOUSE	Eif3j1	Eukaryotic translation initiation factor 3 subunit J-A
Q3UGR5	HDHD2_MOUSE	Hdhd2	Haloacid dehalogenase-like hydrolase domain-containing protein 2		0.18022	0.0627086	9	9	9	59.8	59.8	59.8	28.73	0	145.33	2137200000	233	27.4332	27.9297	27.6186	27.8877	27.8589	27.2674	27.5978	27.6849	27.6082	27.6749	27.3249		Q3UGR5	HDHD2_MOUSE	Hdhd2	Haloacid dehalogenase-like hydrolase domain-containing protein 2
Q3UGS4	MCRI1_MOUSE	Mcrip1	Mapk-regulated corepressor-interacting protein 1		0	NaN	3	3	3	41.2	41.2	41.2	11.101	0.0098691	2.8094	45101000	6	NaN	NaN	NaN	NaN	NaN	NaN	NaN	NaN	NaN	NaN	NaN		Q3UGS4	MCRI1_MOUSE	Mcrip1	Mapk-regulated corepressor-interacting protein 1
A0A1N9M5I8	A0A1N9M5I8_MOUSE	Arfgef3	Brefeldin A-inhibited guanine nucleotide-exchange protein 3		0	NaN	2	2	2	1.5	1.5	1.5	188.13	0.007874	3.0714	11083000	5	NaN	NaN	NaN	NaN	NaN	NaN	NaN	NaN	NaN	NaN	NaN		A0A1N9M5I8	A0A1N9M5I8_MOUSE	Arfgef3	Brefeldin A-inhibited guanine nucleotide-exchange protein 3
Q3UH06	RREB1_MOUSE	Rreb1	Ras-responsive element-binding protein 1		0.0136174	0.0125899	3	3	3	2.8	2.8	2.8	184.15	0	13.132	119510000	15	23.2894	NaN	23.0696	23.0667	NaN	NaN	NaN	23.1412	22.4567	23.335	NaN		Q3UH06	RREB1_MOUSE	Rreb1	Ras-responsive element-binding protein 1
Q3UH60	DIP2B_MOUSE	Dip2b	Disco-interacting protein 2 homolog B		0.00655062	0.00271695	15	15	14	11.6	11.6	10.9	171.12	0	20.074	202120000	53	23.0271	23.2626	22.7605	22.5803	22.5909	22.6461	22.8453	22.8868	22.5863	22.7789	23.0276		Q3UH60	DIP2B_MOUSE	Dip2b	Disco-interacting protein 2 homolog B
Q3UHB1	NT5D3_MOUSE	Nt5dc3	5-nucleotidase domain-containing protein 3		0	NaN	3	3	3	7.5	7.5	7.5	63.17	0.0089014	2.9618	14705000	5	NaN	NaN	NaN	NaN	NaN	NaN	NaN	NaN	NaN	NaN	NaN		Q3UHB1	NT5D3_MOUSE	Nt5dc3	5-nucleotidase domain-containing protein 3
Q3UHD6	SNX27_MOUSE	Snx27	Sorting nexin-27		1.85687	0.339955	9	9	9	22.4	22.4	22.4	60.988	0	23.446	272020000	49	22.8873	23.0807	23.3309	23.0555	22.6733	23.2376	23.3167	23.1287	22.6485	22.7264	23.1217		Q3UHD6	SNX27_MOUSE	Snx27	Sorting nexin-27
Q3UHH1	ZSWM8_MOUSE	Zswim8	Zinc finger SWIM domain-containing protein 8		0	NaN	2	2	2	1.8	1.8	1.8	197.06	0.0072527	3.1383	9767900	4	NaN	NaN	NaN	NaN	NaN	NaN	NaN	NaN	NaN	NaN	NaN		Q3UHH1	ZSWM8_MOUSE	Zswim8	Zinc finger SWIM domain-containing protein 8
Q3UHJ0	AAK1_MOUSE	Aak1	AP2-associated protein kinase 1		0.510564	0.0760111	12	12	9	15.7	15.7	11.7	103.35	0	26.674	276750000	82	23.4947	23.4998	23.5175	23.5509	23.4308	23.3276	23.5831	23.4314	23.1789	23.5554	23.4274		Q3UHJ0	AAK1_MOUSE	Aak1	AP2-associated protein kinase 1
Q3UHN9	NDST1_MOUSE	Ndst1	Bifunctional heparan sulfate N-deacetylase/N-sulfotransferase 1		0.358605	0.13696	8	8	8	10.8	10.8	10.8	100.72	0.00030506	11.41	163000000	45	24.3994	24.1115	24.171	24.3015	23.6398	24.4577	24.2466	23.8074	24.4446	24.4374	23.9956		Q3UHN9	NDST1_MOUSE	Ndst1	Bifunctional heparan sulfate N-deacetylase/N-sulfotransferase 1
A0A2I3BRZ2	A0A2I3BRZ2_MOUSE	Dop1b	Protein dopey-2		0	NaN	4	4	4	2.3	2.3	2.3	244.07	0.0047989	3.6188	9672000	5	NaN	NaN	NaN	NaN	NaN	NaN	NaN	NaN	NaN	NaN	NaN		A0A2I3BRZ2	A0A2I3BRZ2_MOUSE	Dop1b	Protein dopey-2
Q3UHX2	HAP28_MOUSE	Pdap1	28 kDa heat- and acid-stable phosphoprotein		0.14753	-0.029135	8	8	8	35.4	35.4	35.4	20.605	0	43.753	1430100000	139	24.4959	24.7523	24.6547	24.6192	24.6505	24.754	24.5813	24.9137	24.6349	24.8531	24.6604		Q3UHX2	HAP28_MOUSE	Pdap1	28 kDa heat- and acid-stable phosphoprotein
Q3UI43	BABA1_MOUSE	Babam1	BRISC and BRCA1-A complex member 1		0	NaN	4	4	4	25.8	25.8	25.8	36.793	0.00030377	11.225	5553300	8	NaN	NaN	NaN	NaN	NaN	NaN	NaN	NaN	NaN	NaN	NaN		Q3UI43	BABA1_MOUSE	Babam1	BRISC and BRCA1-A complex member 1
Q3UIA2	RHG17_MOUSE	Arhgap17	Rho GTPase-activating protein 17		0.445573	-0.0655713	16	16	16	26.1	26.1	26.1	92.201	0	43.695	584720000	173	24.3698	24.4049	24.4383	24.1724	24.3057	24.3576	24.2476	24.3854	24.2439	24.549	24.4846		Q3UIA2	RHG17_MOUSE	Arhgap17	Rho GTPase-activating protein 17
Q3UIR3	DTX3L_MOUSE	Dtx3l	E3 ubiquitin-protein ligase DTX3L		0.491462	0.250816	15	15	15	28.2	28.2	28.2	83.043	0	71.038	574180000	114	24.9587	24.2577	24.497	24.2823	23.9059	24.6003	25.2462	24.0068	24.1933	24.5885	24.3021		Q3UIR3	DTX3L_MOUSE	Dtx3l	E3 ubiquitin-protein ligase DTX3L
A2AP32	A2AP32_MOUSE	Ndufb6	Complex I-B17		0.189919	-0.105519	3	3	3	33	33	33	11.741	0	43.619	426060000	85	25.4466	25.7321	NaN	25.8328	25.9908	26.2712	25.2697	25.9668	25.7201	26.3231	25.8446		A2AP32	A2AP32_MOUSE	Ndufb6	Complex I-B17
D3Z6J3	D3Z6J3_MOUSE	Cnep1r1	Nuclear envelope phosphatase-regulatory subunit 1		0	NaN	1	1	1	13.3	13.3	13.3	12.895	0.003959	3.8889	1602700	1	NaN	NaN	NaN	NaN	NaN	NaN	NaN	NaN	NaN	NaN	NaN		D3Z6J3	D3Z6J3_MOUSE	Cnep1r1	Nuclear envelope phosphatase-regulatory subunit 1
A0A0A6YWX1	A0A0A6YWX1_MOUSE	Usp19	Ubiquitin carboxyl-terminal hydrolase 19		0.06667	-0.0262097	18	18	18	19.1	19.1	19.1	146.28	0	52.267	317670000	82	24.1992	24.3664	24.5756	24.4928	24.3851	24.5872	24.757	24.7487	24.9294	24.8117	24.418		A0A0A6YWX1	A0A0A6YWX1_MOUSE	Usp19	Ubiquitin carboxyl-terminal hydrolase 19
Q3UJU9	RMD3_MOUSE	Rmdn3	Regulator of microtubule dynamics protein 3		1.09594	-0.299662	9	9	9	25.1	25.1	25.1	52.028	0	38.883	241290000	102	23.7778	23.4456	23.7654	23.9203	24.3412	23.5229	23.8672	23.9823	24.3494	23.7119	23.8611		Q3UJU9	RMD3_MOUSE	Rmdn3	Regulator of microtubule dynamics protein 3
Q3UKC1	TAXB1_MOUSE	Tax1bp1	Tax1-binding protein 1 homolog		0.74022	-0.13053	11	11	11	16.8	16.8	16.8	93.629	0	21.459	243530000	42	23.0418	23.2379	22.8583	22.9905	23.0734	23.0538	23.1338	23.3935	23.1635	23.3578	23.0822		Q3UKC1	TAXB1_MOUSE	Tax1bp1	Tax1-binding protein 1 homolog
Q3UKJ7	SMU1_MOUSE	Smu1	WD40 repeat-containing protein SMU1		0.712828	0.296588	6	6	6	14	14	14	57.543	0	16.967	203420000	44	23.6035	24.3337	24.1702	23.922	23.9944	24.541	24.976	24.1905	24.5311	24.0611	24.1713		Q3UKJ7	SMU1_MOUSE	Smu1	WD40 repeat-containing protein SMU1
Q3ULD5	MCCB_MOUSE	Mccc2	Methylcrotonoyl-CoA carboxylase beta chain, mitochondrial		1.47927	-0.125562	30	30	30	62.3	62.3	62.3	61.378	0	323.31	4336800000	640	25.4188	25.3187	25.466	25.4107	25.5176	25.407	25.3543	25.6109	25.3769	25.5957	25.5815		Q3ULD5	MCCB_MOUSE	Mccc2	Methylcrotonoyl-CoA carboxylase beta chain, mitochondrial
Q3ULJ0	GPD1L_MOUSE	Gpd1l	Glycerol-3-phosphate dehydrogenase 1-like protein		0.246275	-0.0630428	24	22	22	77.8	72.6	72.6	38.225	0	323.31	6527400000	695	27.5191	27.5946	27.3932	27.303	27.3535	27.0576	27.1284	27.4678	27.1272	27.3176	27.3651		Q3ULJ0	GPD1L_MOUSE	Gpd1l	Glycerol-3-phosphate dehydrogenase 1-like protein
Q3ULW8	PARP3_MOUSE	Parp3	Protein mono-ADP-ribosyltransferase PARP3		0	NaN	2	2	2	5.3	5.3	5.3	59.948	0.0026091	4.1697	39331000	15	NaN	NaN	22.3338	22.0923	NaN	21.7633	22.4002	NaN	NaN	NaN	NaN		Q3ULW8	PARP3_MOUSE	Parp3	Protein mono-ADP-ribosyltransferase PARP3
Q3UM18	LSG1_MOUSE	Lsg1	Large subunit GTPase 1 homolog		0.0700036	0.0300374	5	5	5	8.1	8.1	8.1	73.156	0.00053519	6.8338	83652000	33	23.063	23.2975	23.3211	22.9282	23.0053	23.2594	NaN	22.8561	23.6321	23.2337	23.2388		Q3UM18	LSG1_MOUSE	Lsg1	Large subunit GTPase 1 homolog
Q3UM45	PP1R7_MOUSE	Ppp1r7	Protein phosphatase 1 regulatory subunit 7		0.42797	0.0927704	16	16	16	54.6	54.6	54.6	41.291	0	80.3	1348500000	228	25.8898	25.7321	25.8748	25.7993	25.8587	25.737	25.6602	25.5468	25.3446	25.7522	25.6155		Q3UM45	PP1R7_MOUSE	Ppp1r7	Protein phosphatase 1 regulatory subunit 7
Q3UMB9	WASC4_MOUSE	Washc4	WASH complex subunit 4		0.930961	0.20223	14	14	14	17	17	17	136.37	0	47.459	240720000	68	24.9617	25.088	25.0595	25.0152	24.9858	25.0172	25.0496	24.8393	24.4963	24.5966	25.1825		Q3UMB9	WASC4_MOUSE	Washc4	WASH complex subunit 4
[truncated: 3,160 more rows]

## Sheet: Tab 2 Imputed Data
Accession	ID	Gene Name	Description	Significant	.=-LOG(P-value)	Difference		Peptides	Razor + unique peptides	Unique peptides	Sequence coverage [%]	Unique + razor sequence coverage [%]	Unique sequence coverage [%]	Mol. weight [kDa]	Q-value	Score	Intensity	MS/MS count	93	117	156	157	158	166	171	193	196	197	199
[truncated: 3,732 more rows]

[truncated: 2 more sheets: Tab 3 MQ parameters, Tab 4 Perseus Processing]
