# Supplementary material for: Secretory pathway Ca-ATPase 2 (SPCA2) gene knockout results in mouse mammary gland changes and a secretory defect
Source: Research Square preprint supplement (doi:10.21203/rs.3.rs-830264/v1), 2021-08-26
Supplement: Supplementary file 4 [file ec708433fbbf68c3e638c950.xlsx]

## Sheet: Tab 1 Data
Accession	ID	Gene Name	Description	Significant	.=-LOG(P-value)	Difference	Peptides	Razor + unique peptides	Unique peptides	Sequence coverage [%]	Unique + razor sequence coverage [%]	Unique sequence coverage [%]	Mol. weight [kDa]	Q-value	Score	Intensity	MS/MS count	117	171	156	166	157	199	158	193	196	197
P01592	IGJ_MOUSE	Jchain	Immunoglobulin J chain	+	4.44342	-1.68658	3	3	3	17	17	17	18.013	0	208.93	208220000	74	NaN	22.4017	NaN	22.4096	NaN	NaN	NaN	24.1016	NaN	24.0829
P02664	CS2LB_MOUSE	Csn1s2b	Alpha-S2-casein-like B	+	5.52742	3.97901	6	6	0	65.7	65.7	0	16.911	0	323.31	12712000000	561	30.1353	31.7908	30.973	31.5347	30.7101	27.3497	27.3355	27.0886	26.3582	27.1168
P06797	CATL1_MOUSE	Ctsl	Procathepsin L	+	4.09002	1.26895	11	11	11	31.1	31.1	31.1	37.547	0	323.31	671290000	164	24.5221	24.4691	24.8679	24.1156	24.1825	23.1711	23.2828	23.4608	22.8034	23.0944
A0A0G2JF04	A0A0G2JF04_MOUSE	Csn2	Beta-casein	+	4.11741	1.99569	3	3	3	14	14	14	23.636	0	323.31	15433000000	1251	28.5268	29.3318	28.7553	29.0745	28.241	26.8948	27.3929	26.602	26.2438	26.8174
P10605	CATB_MOUSE	Ctsb	Cathepsin B	+	3.37649	0.959124	15	15	15	48.4	48.4	48.4	37.279	0	323.31	3990900000	732	26.4845	26.6283	26.9109	26.3729	26.4076	25.9833	25.7462	25.6844	25.3337	25.2609
P10639	THIO_MOUSE	Txn	Thioredoxin	+	3.11582	-0.724865	4	4	4	46.7	46.7	46.7	11.675	0	323.31	780970000	176	24.693	24.1771	24.3742	24.1963	24.712	25.0014	25.0221	25.13	25.4083	25.215
P10810	CD14_MOUSE	Cd14	Monocyte differentiation antigen CD14	+	2.22835	1.47461	11	11	11	40.7	40.7	40.7	39.203	0	323.31	505680000	128	25.449	25.4982	25.34	24.351	24.1868	24.4767	23.3794	23.5326	22.8071	23.2562
P11152	LIPL_MOUSE	Lpl	Lipoprotein lipase	+	2.28001	1.33744	10	10	10	31.4	31.4	31.4	53.109	0	323.31	1194500000	296	25.2711	25.7797	25.7429	25.7653	24.6232	24.3336	24.8021	24.1772	23.1442	24.038
F8WIR1	F8WIR1_MOUSE	Ctsd	Cathepsin D	+	2.83079	2.43209	13	13	13	45.8	45.8	45.8	44.215	0	323.31	963220000	152	25.269	25.4996	25.0255	24.6973	25.0167	23.4832	22.9037	NaN	21.6217	NaN
P29788	VTNC_MOUSE	Vtn	Vitronectin	+	2.75978	1.11003	5	5	5	15.3	15.3	15.3	54.848	0	53.367	107460000	56	22.6343	23.547	23.4907	23.142	22.8955	21.8629	22.3257	22.3919	21.4774	22.1016
A0A0A6YXW6	A0A0A6YXW6_MOUSE	Igha	Immunoglobulin heavy constant alpha (Fragment)	+	3.23949	-1.26599	13	13	13	59.1	59.1	59.1	41.958	0	323.31	5230500000	687	27.0057	27.3171	26.5256	26.6968	26.7621	27.9633	28.3254	28.126	27.5562	28.6663
Q91XL1	Q91XL1_MOUSE	Lrg1	Leucine-rich HEV glycoprotein	+	2.86507	1.24077	4	4	4	15.8	15.8	15.8	37.431	0	323.31	767790000	220	25.8924	26.1921	26.5444	25.9823	25.925	25.2741	24.6357	25.3929	24.1262	24.9033
A2A934	A2A934_MOUSE	Prdm16	Histone-lysine N-methyltransferase PRDM16		0	NaN	2	2	2	2.4	2.4	2.4	130.34	0.0088161	3.5797	260060000	11	NaN	NaN	NaN	NaN	NaN	NaN	NaN	NaN	NaN	NaN
A2ADY9	DDI2_MOUSE	Ddi2	Protein DDI1 homolog 2		0	NaN	2	2	2	8.5	8.5	8.5	44.59	0.0043042	4.9246	2347100	3	NaN	NaN	NaN	NaN	NaN	NaN	NaN	NaN	NaN	NaN
A3KMP2	TTC38_MOUSE	Ttc38	Tetratricopeptide repeat protein 38		0.55284	-0.413938	10	10	10	29	29	29	52.223	0	29.617	29033000	27	21.3635	NaN	NaN	NaN	21.6843	NaN	NaN	NaN	22.1699	21.7057
A6X935	ITIH4_MOUSE	Itih4	Inter alpha-trypsin inhibitor, heavy chain 4		0.183262	-0.135183	24	24	1	36.6	36.6	2.3	104.66	0	323.31	1950300000	572	26.14	26.7257	26.8474	27.1452	26.4148	26.9016	27.1755	27.2364	25.9344	26.7012
C0HKE4	H2A1E_MOUSE	H2ac8	Histone H2A type 1-E		0	NaN	2	2	2	21.5	21.5	21.5	14.135	0.0078227	3.8773	11250000	3	NaN	NaN	NaN	NaN	NaN	NaN	NaN	NaN	NaN	NaN
C0HKG6	RNT2B_MOUSE	Rnaset2b	Ribonuclease T2-B		1.19934	0.478578	6	6	6	33.6	33.6	33.6	29.608	0	21.401	345980000	77	25.5498	25.8782	26.0032	25.3626	25.0231	24.9176	24.8266	25.5627	24.924	25.1931
E9PV24	FIBA_MOUSE	Fga	Fibrinogen alpha chain		0.151822	0.258172	16	16	16	22.7	22.7	22.7	87.428	0	323.31	1475500000	311	24.0256	24.9936	25.3189	25.4122	23.9476	24.9968	25.5735	25.5424	22.6366	23.6575
E9Q4Z2	ACACB_MOUSE	Acacb	Acetyl-CoA carboxylase 2		0	NaN	9	2	2	5	1	1	275.75	0.004298	4.9187	14638000	4	NaN	NaN	NaN	NaN	NaN	NaN	NaN	NaN	NaN	NaN
D3YTY9	D3YTY9_MOUSE	Kng1	Kininogen-1		0.00442922	0.00337067	19	19	16	43.8	43.8	35.6	53.204	0	323.31	16649000000	1788	27.5032	28.0716	28.2695	28.1135	27.4215	27.7469	27.9908	28.3963	27.2352	27.9932
O08691	ARGI2_MOUSE	Arg2	Arginase-2, mitochondrial		0	NaN	4	4	4	18.9	18.9	18.9	38.878	0	39.018	16134000	8	NaN	NaN	NaN	NaN	NaN	NaN	NaN	NaN	NaN	NaN
Q6GT24	Q6GT24_MOUSE	Prdx6	Peroxiredoxin-6		0.306721	-0.186094	15	15	15	69.2	69.2	69.2	24.826	0	323.31	901660000	302	24.8756	24.1563	24.2487	24.0403	24.7978	24.5467	24.3037	24.1423	25.2353	24.8211
O08738	CASP6_MOUSE	Casp6	Caspase-6		0	NaN	5	5	5	23.6	23.6	23.6	31.595	0.0019493	11.346	18154000	12	NaN	NaN	NaN	NaN	NaN	NaN	NaN	NaN	NaN	NaN
O08749	DLDH_MOUSE	Dld	Dihydrolipoyl dehydrogenase, mitochondrial		0.0241563	0.0219994	5	5	5	12.4	12.4	12.4	54.272	0.0020833	14.422	77347000	29	23.2265	22.1995	22.4006	NaN	22.9786	22.7121	22.5697	NaN	23.1916	22.2437
O08795	GLU2B_MOUSE	Prkcsh	Glucosidase 2 subunit beta		0	-0.0324326	2	2	2	4.2	4.2	4.2	58.792	0.005291	4.0129	11144000	8	NaN	NaN	NaN	NaN	19.655	NaN	NaN	NaN	19.6874	NaN
O08796	EF2K_MOUSE	Eef2k	Eukaryotic elongation factor 2 kinase		0	NaN	2	2	2	3.9	3.9	3.9	81.738	0.007762	3.7841	4902400	3	NaN	NaN	NaN	NaN	NaN	NaN	NaN	NaN	NaN	NaN
O08807	PRDX4_MOUSE	Prdx4	Peroxiredoxin-4		0.689126	-0.209103	10	9	9	42.3	42.3	42.3	31.052	0	238.23	666800000	156	24.5135	24.7996	24.7678	24.3153	25.0684	24.7816	25.049	24.6987	25.1181	24.8627
O08997	ATOX1_MOUSE	Atox1	Copper transport protein ATOX1		1.10745	-0.380427	5	5	5	73.5	73.5	73.5	7.3384	0	98.395	291460000	106	22.6916	22.2482	22.3433	22.4921	22.9813	23.1103	22.9443	22.5446	23.3171	22.7423
O09131	GSTO1_MOUSE	Gsto1	Glutathione S-transferase omega-1		0.540129	-0.634382	7	7	7	24.2	24.2	24.2	27.497	0	128.2	304940000	53	25.1797	23.5392	NaN	23.4343	23.9701	NaN	24.308	NaN	25.2519	24.4357
O09164	SODE_MOUSE	Sod3	Extracellular superoxide dismutase [Cu-Zn]		0	NaN	2	2	2	11.6	11.6	11.6	27.392	0.0088945	3.6342	1746900	2	NaN	NaN	NaN	NaN	NaN	NaN	NaN	NaN	NaN	NaN
O09172	GSH0_MOUSE	Gclm	Glutamate--cysteine ligase regulatory subunit		0	-0.404909	3	3	3	14.6	14.6	14.6	30.534	0.0016103	6.5508	15447000	10	NaN	20.8939	NaN	NaN	21.6567	NaN	NaN	NaN	21.6802	NaN
O35215	DOPD_MOUSE	Ddt	D-dopachrome decarboxylase		0	NaN	5	1	1	64.4	12.7	12.7	13.077	0	26.264	71546000	22	NaN	NaN	NaN	NaN	NaN	22.1989	NaN	NaN	23.1315	NaN
E9PVM9	E9PVM9_MOUSE	Ppt2	Lysosomal thioesterase PPT2 (Fragment)		0	NaN	1	1	1	13.7	13.7	13.7	11.549	0.0089514	3.6735	3747400	3	NaN	NaN	NaN	NaN	NaN	NaN	NaN	NaN	NaN	NaN
K3W4S5	K3W4S5_MOUSE	Sema6a	Semaphorin-6A		0	NaN	1	1	1	1.4	1.4	1.4	111.79	0.008761	3.5232	64279000	2	NaN	NaN	NaN	NaN	NaN	NaN	NaN	NaN	NaN	NaN
O35598	ADA10_MOUSE	Adam10	Disintegrin and metalloproteinase domain-containing protein 10		0	NaN	2	2	2	6	6	6	83.967	0.0015674	6.1865	12896000	6	NaN	NaN	NaN	NaN	NaN	NaN	NaN	NaN	NaN	NaN
Q5SVG5	Q5SVG5_MOUSE	Ap1b1	AP complex subunit beta		0	NaN	2	2	2	4.7	4.7	4.7	101.19	0.0021008	14.946	3810000	5	NaN	NaN	NaN	NaN	NaN	NaN	NaN	NaN	NaN	NaN
A0A1B0GX27	A0A1B0GX27_MOUSE	Bcat2	Branched-chain-amino-acid aminotransferase		0.146916	0.166972	8	8	8	29.1	29.1	29.1	43.493	0	53.36	124410000	57	23.4869	22.0907	NaN	NaN	23.1279	22.5136	22.7197	NaN	23.3259	22.3803
Q3V2G6	Q3V2G6_MOUSE	Tpd52l1	Tumor protein D53		0	NaN	2	2	2	21.4	21.4	21.4	14.752	0.0017391	7.948	1561600	6	NaN	NaN	NaN	NaN	NaN	NaN	NaN	NaN	NaN	NaN
O54984	GET3_MOUSE	Get3	ATPase GET3		0	NaN	2	2	2	5.2	5.2	5.2	38.822	0.0028986	5.0058	27871000	10	NaN	NaN	NaN	NaN	NaN	23.0405	NaN	NaN	22.3124	NaN
O55137	ACOT1_MOUSE	Acot1	Acyl-coenzyme A thioesterase 1		0.922858	-0.737279	9	9	9	28.2	28.2	28.2	46.135	0	50.053	133980000	57	21.667	21.7568	20.6296	21.0574	22.1246	21.7602	NaN	21.5329	22.925	22.5193
O70165	FCN1_MOUSE	Fcn1	Ficolin-1		0	NaN	1	1	1	3.6	3.6	3.6	36.298	0.0040268	4.1425	460890	1	NaN	NaN	NaN	NaN	NaN	NaN	NaN	NaN	NaN	NaN
O70251	EF1B_MOUSE	Eef1b	Elongation factor 1-beta		0.70238	0.374226	8	8	6	52	52	46.7	24.693	0	323.31	259370000	106	22.4182	22.2888	22.198	22.3532	23.1783	21.8702	21.7481	NaN	22.6161	22.2179
S4R1E5	S4R1E5_MOUSE	Gpx4	Glutathione peroxidase		0	-0.0227461	3	3	3	24.2	24.2	24.2	17.937	0.0015873	6.347	15950000	9	NaN	NaN	NaN	NaN	20.9736	21.2878	NaN	NaN	20.7049	NaN
O70400	PDLI1_MOUSE	Pdlim1	PDZ and LIM domain protein 1		0	NaN	2	2	2	9.8	9.8	9.8	35.774	0.002924	5.0832	7440100	7	NaN	NaN	NaN	NaN	NaN	NaN	NaN	NaN	NaN	NaN
O70456	1433S_MOUSE	Sfn	14-3-3 protein sigma		0	NaN	4	2	2	19.4	12.1	12.1	27.706	0.0077419	3.773	2080300	2	NaN	NaN	NaN	NaN	NaN	NaN	NaN	NaN	NaN	NaN
O70570	PIGR_MOUSE	Pigr	Polymeric immunoglobulin receptor		1.07142	0.458876	22	22	22	29.7	29.7	29.7	84.998	0	323.31	9105800000	1067	27.5858	27.7705	27.557	27.5626	26.9317	26.5858	26.8564	26.9987	26.9724	27.7
O88322	NID2_MOUSE	Nid2	Nidogen-2		0.236282	-0.233826	9	9	9	10.9	10.9	10.9	153.91	0	44.385	77967000	55	22.696	NaN	23.3024	23.5271	NaN	23.64	24.1069	22.9716	NaN	22.9175
O88342	WDR1_MOUSE	Wdr1	WD repeat-containing protein 1		0.661878	-0.518703	12	12	12	39.6	39.6	39.6	66.406	0	188.25	481010000	141	23.4453	22.7844	21.7778	22.4995	23.5362	23.5464	22.9418	22.769	23.9577	23.4219
A2BFF8	A2BFF8_MOUSE	Dync1i2	Cytoplasmic dynein 1 intermediate chain 2		0	NaN	1	1	1	2.3	2.3	2.3	68.265	0.0089286	3.6515	729500	1	NaN	NaN	NaN	NaN	NaN	NaN	NaN	NaN	NaN	NaN
O88531	PPT1_MOUSE	Ppt1	Palmitoyl-protein thioesterase 1		0	0.33789	4	4	4	19.3	19.3	19.3	34.49	0	40.776	46061000	32	NaN	22.0025	22.2709	21.926	21.631	NaN	NaN	21.6197	NaN	NaN
D3Z036	D3Z036_MOUSE	Cops3	COP9 signalosome complex subunit 3 (Fragment)		0	NaN	1	1	1	11.3	11.3	11.3	11.465	0.0030534	5.5898	4873100	5	NaN	NaN	NaN	NaN	NaN	NaN	NaN	NaN	NaN	NaN
O88668	CREG1_MOUSE	Creg1	Protein CREG1		0	NaN	3	3	3	14.5	14.5	14.5	24.452	0.0016447	6.9856	22346000	22	22.7908	22.5437	22.0402	22.3604	21.8955	NaN	NaN	NaN	NaN	NaN
O88844	IDHC_MOUSE	Idh1	Isocitrate dehydrogenase [NADP] cytoplasmic		0	0.574248	3	3	3	6.5	6.5	6.5	46.674	0.0016892	7.2997	207880000	62	NaN	NaN	NaN	NaN	23.8405	NaN	NaN	NaN	23.3042	23.2282
O88968	TCO2_MOUSE	Tcn2	Transcobalamin-2		0.40731	-0.190351	15	15	15	47.9	47.9	47.9	47.585	0	323.31	2050100000	485	26.5309	26.1619	26.6006	26.4188	25.8101	26.3624	26.9492	26.5422	26.017	26.6034
O89020	AFAM_MOUSE	Afm	Afamin		0.479062	-0.286165	10	10	10	20.4	20.4	20.4	69.378	0	316.69	1654800000	368	24.7461	25.2173	25.181	25.0132	24.1467	24.9111	25.2421	25.7832	24.6103	25.1884
O89023	TPP1_MOUSE	Tpp1	Tripeptidyl-peptidase 1		0	1.2572	3	3	3	11.9	11.9	11.9	61.341	0.0020492	13.543	39981000	17	23.0149	23.4371	NaN	22.7779	22.9506	NaN	NaN	NaN	21.7879	NaN
O89051	ITM2B_MOUSE	Itm2b	Integral membrane protein 2B		0	NaN	3	3	3	16.9	16.9	16.9	30.26	0.0015798	6.3109	5024600	4	NaN	NaN	NaN	NaN	NaN	NaN	NaN	NaN	NaN	NaN
P00493	HPRT_MOUSE	Hprt1	Hypoxanthine-guanine phosphoribosyltransferase		0	NaN	3	3	3	17	17	17	24.57	0.0016026	6.4493	11858000	7	NaN	NaN	NaN	NaN	NaN	NaN	NaN	NaN	NaN	NaN
P00687	AMY1_MOUSE	Amy1	Alpha-amylase 1		0.303937	0.156197	6	6	4	19.2	19.2	13.5	57.643	0	197.73	73366000	45	22.3858	23.0319	22.7046	23.1438	22.2563	22.367	22.6367	23.029	22.2743	22.4344
P00688	AMYP_MOUSE	Amy2	Pancreatic alpha-amylase		0	NaN	3	1	1	10.8	5.1	5.1	57.318	0.002994	5.271	2879400	3	NaN	NaN	NaN	NaN	NaN	NaN	NaN	NaN	NaN	NaN
P00920	CAH2_MOUSE	Ca2	Carbonic anhydrase 2		0.3746	-0.21549	8	8	8	56.9	56.9	56.9	29.032	0	64.568	148960000	63	23.4532	22.7133	23.669	NaN	23.5023	23.3846	23.2828	NaN	23.8626	23.6699
P01027	CO3_MOUSE	C3	Complement C3		0.21705	-0.146147	79	79	79	53.9	53.9	53.9	186.48	0	323.31	18795000000	3662	26.0456	26.8492	26.9925	27.1054	26.2836	26.8627	26.9012	27.2316	26.1518	26.8598
P01029	CO4B_MOUSE	C4b	Complement C4-B		1.02672	0.416213	27	27	27	23.5	23.5	23.5	192.91	0	323.31	777040000	274	25.2768	25.3234	25.6263	25.7079	25.2634	25.0561	25.4029	25.2443	24.2664	25.147
P01132	EGF_MOUSE	Egf	Pro-epidermal growth factor		0.979369	-0.436873	10	10	10	11.2	11.2	11.2	133.07	0	45.977	337620000	110	24.4383	24.231	24.7776	24.4959	23.8993	24.5576	25.2376	25.1043	24.2033	24.9237
P01173	WAP_MOUSE	Wap	Whey acidic protein		0	0.493866	6	1	1	62.7	15.7	15.7	14.423	0	323.31	59058000	20	NaN	24.2255	NaN	NaN	NaN	NaN	NaN	NaN	23.7316	NaN
P01630	KV2A6_MOUSE		Ig kappa chain V-II region 7S34.1		0	NaN	1	1	1	11.5	11.5	11.5	12.496	0.0028902	4.9813	1063200	4	NaN	NaN	NaN	NaN	NaN	NaN	NaN	NaN	NaN	NaN
P01631	KV2A7_MOUSE		Ig kappa chain V-II region 26-10		0	NaN	2	2	2	17.7	17.7	17.7	12.273	0	92.241	145110000	61	NaN	NaN	NaN	NaN	NaN	23.6617	23.4451	23.8438	23.111	24.6842
P01642	KV5A9_MOUSE	Gm10881	Ig kappa chain V-V region L7 (Fragment)		0	NaN	1	1	1	10.4	10.4	10.4	12.615	0.0030211	5.444	19335000	19	NaN	NaN	NaN	NaN	NaN	NaN	NaN	NaN	NaN	NaN
P01643	KV5AA_MOUSE		Ig kappa chain V-V region MOPC 173		0	NaN	2	2	1	31.5	31.5	14.8	11.217	0.0015974	6.4363	9519900	9	NaN	NaN	NaN	NaN	NaN	NaN	NaN	NaN	NaN	NaN
P03977	KV3A4_MOUSE		Ig kappa chain V-III region 50S10.1		1.13734	-0.537894	2	2	1	30.6	30.6	14.4	12.042	0	102.65	20666000	17	NaN	NaN	22.2663	22.3832	NaN	22.7205	NaN	23.0049	NaN	NaN
A0A075B663	A0A075B663_MOUSE	Iglv1	Immunoglobulin lambda variable 1 (Fragment)		0	NaN	2	2	2	34.2	34.2	34.2	12.312	0	135.48	22378000	13	NaN	NaN	NaN	NaN	NaN	NaN	NaN	NaN	NaN	NaN
P01753	HVM09_MOUSE		Ig heavy chain V region 186-1		0	NaN	2	2	2	18.8	18.8	18.8	12.89	0.0089059	3.635	26875000	8	NaN	NaN	NaN	NaN	NaN	NaN	NaN	NaN	NaN	NaN
P01800	HVM31_MOUSE		Ig heavy chain V-III region T957		0	NaN	2	2	1	22.1	22.1	8	12.732	0.0017182	7.7171	6367100	4	NaN	NaN	NaN	NaN	NaN	NaN	NaN	NaN	NaN	NaN
P01837	IGKC_MOUSE	Igkc	Immunoglobulin kappa constant		1.62858	-0.688802	4	4	4	63.6	63.6	63.6	11.934	0	323.31	781160000	158	23.9842	24.2023	23.9241	24.3322	23.5053	24.5269	25.0703	24.8063	23.9671	25.0214
P01843	LAC1_MOUSE		Ig lambda-1 chain C region		2.01438	-1.39477	4	4	4	64.8	64.8	64.8	11.575	0	267.34	159260000	58	21.6784	NaN	NaN	21.9391	21.8496	23.2843	NaN	22.6843	NaN	23.6827
P01844	LAC2_MOUSE	Iglc2	Ig lambda-2 chain C region		0	-0.717077	3	3	3	48.1	48.1	48.1	11.254	0.0017857	8.9152	37386000	12	NaN	NaN	NaN	21.6693	NaN	22.3864	NaN	NaN	NaN	NaN
P01872	IGHM_MOUSE	Ighm	Immunoglobulin heavy constant mu		0	NaN	1	1	1	5.1	5.1	5.1	49.971	0.0017668	8.5639	3778300	7	NaN	NaN	NaN	NaN	NaN	NaN	NaN	NaN	NaN	NaN
P01887	B2MG_MOUSE	B2m	Beta-2-microglobulin		0.332829	0.444993	3	3	3	40.3	40.3	40.3	13.779	0	62.213	184990000	136	22.2846	23.9855	NaN	23.7761	NaN	NaN	22.9066	23.6786	22.305	22.7245
P01898	HA10_MOUSE	H2-Q10	H-2 class I histocompatibility antigen, Q10 alpha chain		0.042453	-0.0288441	13	13	9	50.8	50.8	36.9	37.251	0	100.09	615390000	162	24.1451	25.2071	24.8456	24.6668	24.0954	24.6847	24.6189	24.8965	24.2178	24.6863
P02816	PIP_MOUSE	Pip	Prolactin-inducible protein homolog		0	NaN	3	3	3	27.4	27.4	27.4	16.823	0.0018832	10.458	31780000	27	NaN	NaN	NaN	NaN	NaN	NaN	NaN	NaN	NaN	NaN
P03953	CFAD_MOUSE	Cfd	Complement factor D		0.0270858	0.0212257	7	7	7	39.4	39.4	39.4	28.057	0	311.69	1411300000	234	25.3893	25.9481	25.265	25.5796	24.5013	25.1481	25.1946	25.341	25.0898	25.8035
P03958	ADA_MOUSE	Ada	Adenosine deaminase		0	-0.0584087	4	4	4	16.5	16.5	16.5	39.991	0	22.109	37274000	20	20.2549	19.4432	19.9055	19.6675	20.4011	19.9929	NaN	NaN	NaN	NaN
P04117	FABP4_MOUSE	Fabp4	Fatty acid-binding protein, adipocyte		0	NaN	3	3	3	17.4	17.4	17.4	14.65	0.001692	7.3757	859640000	48	25.654	25.2505	25.828	24.6671	25.6063	NaN	NaN	NaN	NaN	NaN
P04444	HBBZ_MOUSE	Hbb-bh1	Hemoglobin subunit beta-H1		0	NaN	1	1	1	6.8	6.8	6.8	16.494	0	152.59	224640000	26	NaN	NaN	NaN	NaN	NaN	NaN	NaN	NaN	NaN	NaN
P05063	ALDOC_MOUSE	Aldoc	Fructose-bisphosphate aldolase C		0.2949	0.165268	28	28	25	84.3	84.3	74.7	39.394	0	323.31	3539300000	836	26.3267	26.0678	25.4897	25.957	26.2786	25.7668	25.5016	25.4898	26.4654	26.0698
P05064	ALDOA_MOUSE	Aldoa	Fructose-bisphosphate aldolase A		0.393238	-0.21867	17	14	5	66.2	56.6	22.3	39.355	0	323.31	737970000	238	24.7077	24.1349	23.9248	24.2151	24.9612	24.5208	24.3598	24.257	25.1352	24.7642
P05201	AATC_MOUSE	Got1	Aspartate aminotransferase, cytoplasmic		0.0808336	0.0958506	12	12	12	42.9	42.9	42.9	46.247	0	163.84	108370000	57	22.959	22.0852	NaN	NaN	22.8909	22.2631	NaN	NaN	23.1701	22.2143
P05202	AATM_MOUSE	Got2	Aspartate aminotransferase, mitochondrial		0.296333	-0.326511	9	9	9	26.3	26.3	26.3	47.411	0	323.31	304250000	105	24.9176	23.7378	23.2295	23.2056	24.7519	24.5121	23.9066	23.8954	25.3453	23.8155
P05213	TBA1B_MOUSE	Tuba1b	Tubulin alpha-1B chain		0.219298	0.282456	12	12	0	40.4	40.4	0	50.151	0	323.31	373680000	205	24.2768	23.4656	23.3408	23.4466	23.2911	24.3849	23.7061	21.5991	23.8906	22.8279
P05366	SAA1_MOUSE	Saa1	Serum amyloid A-1 protein		0	NaN	1	1	1	7.4	7.4	7.4	13.77	0	286.67	161820000	25	NaN	NaN	NaN	NaN	NaN	NaN	NaN	NaN	NaN	NaN
P06151	LDHA_MOUSE	Ldha	L-lactate dehydrogenase A chain		0.0709411	0.0427132	23	23	22	69.6	69.6	66	36.498	0	323.31	10238000000	1190	28.2299	28.076	27.8618	27.6915	28.554	28.1641	27.899	27.5343	28.4937	28.1085
P06330	HVM51_MOUSE		Ig heavy chain V region AC38 205.12		0	-1.91109	4	4	4	40.7	40.7	40.7	12.934	0	180.01	298040000	65	NaN	NaN	NaN	22.3709	NaN	24.9737	24.5479	23.3195	NaN	24.2869
A0A0R4J032	A0A0R4J032_MOUSE	C9	Complement component C9		0	NaN	2	2	2	4.3	4.3	4.3	63.425	0.0098401	3.4235	1501500	1	NaN	NaN	NaN	NaN	NaN	NaN	NaN	NaN	NaN	NaN
P06728	APOA4_MOUSE	Apoa4	Apolipoprotein A-IV		0.16995	0.108778	22	22	22	68.9	68.9	68.9	45.029	0	323.31	33648000000	3087	28.29	28.6625	28.7854	28.8161	27.8021	28.061	28.6127	28.8051	27.9442	28.3892
P06745	G6PI_MOUSE	Gpi	Glucose-6-phosphate isomerase		0.131011	0.128393	13	13	13	37.6	37.6	37.6	62.766	0	323.31	308540000	128	24.3	24.0138	NaN	23.7834	24.8444	24.3421	23.7827	23.2242	24.8195	24.3666
P06796	CASK_MOUSE	Csn3	Kappa-casein		0.193548	-0.10825	8	8	8	34.3	34.3	34.3	20.03	0	323.31	56018000000	2341	31.5717	31.8833	31.4519	31.1391	31.0996	31.4487	30.9496	31.9574	31.7435	31.5875
P06801	MAOX_MOUSE	Me1	NADP-dependent malic enzyme		0.38347	-0.201897	29	29	29	69.1	69.1	69.1	63.953	0	323.31	9151400000	1755	27.4349	26.8545	26.8589	26.7406	27.5556	27.3386	27.106	26.8124	27.7917	27.4053
D6RGQ0	D6RGQ0_MOUSE	Cfh	Complement factor H		0	NaN	5	5	5	7.5	7.5	7.5	125.05	0.0019802	11.868	26641000	21	NaN	NaN	NaN	NaN	NaN	21.3339	NaN	21.9701	20.9439	21.9841
P07141	CSF1_MOUSE	Csf1	Macrophage colony-stimulating factor 1		0	0.0200424	4	4	4	9.4	9.4	9.4	60.648	0.0019763	11.863	104560000	49	23.2901	23.8471	22.932	NaN	23.5513	23.3851	NaN	NaN	NaN	NaN
Q5NCU4	Q5NCU4_MOUSE	Sparc	Osteonectin		0.018415	0.0173073	5	5	5	25.2	25.2	25.2	34.322	0	20.541	64005000	33	21.0435	21.0059	NaN	21.0206	NaN	21.1188	21.473	21.4588	20.1942	20.7852
P07309	TTHY_MOUSE	Ttr	Transthyretin		0.0148792	-0.0640841	10	10	10	73.5	73.5	73.5	15.776	0	323.31	1047700000	184	27.8438	24.6022	21.4179	21.5378	25.6526	23.935	NaN	23.0581	25.353	24.7537
P07724	ALBU_MOUSE	Alb	Albumin		0.220426	-0.12065	63	63	60	74.2	74.2	73.4	68.692	0	323.31	1554400000000	38500	32.6727	33.2392	33.2243	33.1767	32.4739	33.0056	33.2457	33.4418	32.53	33.167
A0A0A0MQA3	A0A0A0MQA3_MOUSE	Serpina1a	Alpha-1-antitrypsin 1-1		0.166243	-0.204279	20	2	2	54.1	11.9	11.9	48.795	0	84.141	196730000	62	23.9954	25.4506	25.0652	24.143	24.2493	NaN	24.0561	25.3755	NaN	24.9234
P07901	HS90A_MOUSE	Hsp90aa1	Heat shock protein HSP 90-alpha		0.072588	-0.0464977	27	16	16	35.7	22	22	84.787	0	323.31	981610000	289	24.6787	24.5352	24.3602	24.3103	24.8831	24.8199	24.2045	24.0416	25.1518	24.7822
P08003	PDIA4_MOUSE	Pdia4	Protein disulfide-isomerase A4		0	NaN	2	2	2	3.3	3.3	3.3	71.982	0.0088496	3.595	7085100	3	NaN	NaN	NaN	NaN	NaN	NaN	NaN	NaN	NaN	NaN
P08030	APT_MOUSE	Aprt	Adenine phosphoribosyltransferase		0.584124	0.2313	3	3	3	20	20	20	19.724	0.0016863	7.2943	34487000	21	22.2092	NaN	NaN	22.0541	22.4401	21.9345	NaN	NaN	22.2663	21.8087
P08071	TRFL_MOUSE	Ltf	Lactotransferrin		1.92227	1.79103	37	37	37	62.1	62.1	62.1	77.837	0	323.31	1989300000	442	23.8846	24.7056	25.6381	26.4108	24.8048	24.3922	23.4684	22.2998	22.8964	23.432
P08113	ENPL_MOUSE	Hsp90b1	Endoplasmin		0.576236	-0.317724	13	11	11	20.6	18.8	18.8	92.475	0	323.31	268180000	114	23.8389	23.2323	22.7353	22.781	23.8517	23.4448	23.5373	23.3558	23.7641	23.9258
P08226	APOE_MOUSE	Apoe	Apolipoprotein E		0.753217	-0.313444	9	9	9	30.9	30.9	30.9	35.866	0	323.31	634580000	246	22.9308	23.1416	23.5901	23.0557	22.9146	23.2132	23.4086	24.0586	23.0468	23.473
P08228	SODC_MOUSE	Sod1	Superoxide dismutase [Cu-Zn]		0.141307	-0.109432	10	10	10	56.5	56.5	56.5	15.942	0	323.31	4576700000	484	28.4119	27.7889	27.5577	27.4892	28.2944	28.3054	27.495	27.4731	28.6245	28.1914
P08249	MDHM_MOUSE	Mdh2	Malate dehydrogenase, mitochondrial		0.0334647	-0.0331718	13	13	13	52.7	52.7	52.7	35.611	0	323.31	753610000	253	25.3795	23.9212	24.27	23.8237	24.4409	24.6931	24.5416	23.8069	24.916	24.0435
P09103	PDIA1_MOUSE	P4hb	Protein disulfide-isomerase		0.93034	-0.526269	26	26	26	50.1	50.1	50.1	57.058	0	323.31	2684900000	659	25.343	24.483	24.2834	24.4243	25.4788	25.002	25.2493	25.0046	25.8525	25.5353
P09411	PGK1_MOUSE	Pgk1	Phosphoglycerate kinase 1		0.769674	-0.437307	19	19	19	64.5	64.5	64.5	44.55	0	323.31	4652300000	744	26.8452	25.9217	25.7426	25.9261	26.8153	26.9083	26.7314	26.0868	27.0421	26.6688
P09470	ACE_MOUSE	Ace	Angiotensin-converting enzyme		0.110853	0.0798278	10	10	10	10.5	10.5	10.5	150.92	0	21.46	65858000	55	21.728	22.006	21.5216	21.1188	21.2041	21.2514	NaN	21.851	21.2052	NaN
P09671	SODM_MOUSE	Sod2	Superoxide dismutase [Mn], mitochondrial		0	0.313446	2	2	2	12.6	12.6	12.6	24.603	0	68.569	51595000	26	23.8731	NaN	NaN	NaN	22.7592	NaN	NaN	NaN	23.0027	NaN
A0A0R4IZW5	A0A0R4IZW5_MOUSE	Cdh1	Cadherin-1		0	NaN	2	2	2	3.1	3.1	3.1	98.283	0.00894	3.6566	1322900	3	NaN	NaN	NaN	NaN	NaN	NaN	NaN	NaN	NaN	NaN
P09813	APOA2_MOUSE	Apoa2	Apolipoprotein A-II		0.216305	0.360147	1	1	1	9.8	9.8	9.8	11.309	0	130.27	192550000	68	22.4886	22.4261	22.2161	24.2174	NaN	21.1925	NaN	23.492	22.6878	22.5353
A0A0A6YW67	A0A0A6YW67_MOUSE	Gm8797	Predicted pseudogene 8797		0.391681	-0.294497	2	2	2	32.5	32.5	32.5	8.7279	0	320.42	175330000	56	NaN	23.314	22.7633	23.1691	24.0948	23.4404	NaN	23.3813	24.1462	23.5515
P0DP28	CALM3_MOUSE	Calm3	Calmodulin-3		0	0.0647079	4	4	4	28.2	28.2	28.2	16.837	0	323.31	161140000	39	22.4398	22.712	22.2225	22.2003	22.4204	NaN	NaN	NaN	22.3343	NaN
P10126	EF1A1_MOUSE	Eef1a1	Elongation factor 1-alpha 1		0.253327	-0.154185	15	15	15	51.7	51.7	51.7	50.113	0	323.31	9354200000	1111	27.8102	27.4048	27.2482	27.2381	28.266	27.9853	27.5691	27.2775	28.1752	27.7312
P10404	ENV1_MOUSE		MLV-related proviral Env polyprotein		0.229803	-0.238232	10	10	10	17.2	17.2	17.2	69.612	0	323.31	2237300000	384	25.653	26.2342	26.4426	25.6434	25.404	26.4797	26.9336	26.4624	24.7528	25.9399
P10518	HEM2_MOUSE	Alad	Delta-aminolevulinic acid dehydratase		0	NaN	3	3	3	14.5	14.5	14.5	36.023	0.0017825	8.8314	4872400	2	NaN	NaN	NaN	NaN	NaN	NaN	NaN	NaN	NaN	NaN
P10630	IF4A2_MOUSE	Eif4a2	Eukaryotic initiation factor 4A-II		0	NaN	8	3	3	25.3	7.6	7.6	46.402	0.0016474	6.9858	6698400	4	NaN	NaN	NaN	NaN	NaN	NaN	NaN	NaN	NaN	NaN
P10649	GSTM1_MOUSE	Gstm1	Glutathione S-transferase Mu 1		0	NaN	4	4	4	20.2	20.2	20.2	25.97	0	23.551	58497000	35	NaN	NaN	NaN	NaN	NaN	NaN	NaN	NaN	NaN	NaN
P10923	OSTP_MOUSE	Spp1	Osteopontin		0	2.89829	7	7	7	37.8	37.8	37.8	32.459	0	323.31	899810000	121	23.0564	25.042	26.5295	29.1917	25.7705	23.0197	NaN	NaN	NaN	NaN
B7ZNJ1	B7ZNJ1_MOUSE	Fn1	Fibronectin		0.148874	-0.210398	10	10	10	7.4	7.4	7.4	239.72	0	45.616	54916000	44	20.5433	22.3871	NaN	21.5468	21.2375	21.0262	NaN	22.1977	NaN	21.6933
P11352	GPX1_MOUSE	Gpx1	Glutathione peroxidase 1		0.555827	-0.777866	13	13	13	70.1	70.1	70.1	22.329	0	293.56	418890000	194	24.8232	24.0358	21.4496	23.8311	24.9367	24.7208	24.2576	24.2557	25.4255	24.3062
P11404	FABPH_MOUSE	Fabp3	Fatty acid-binding protein, heart		0.0113759	-0.00573921	10	10	10	66.9	66.9	66.9	14.819	0	323.31	102800000000	3946	32.0314	31.5522	31.7033	31.7218	32.4894	31.9972	31.8076	31.9495	31.9653	31.8073
D3Z2T9	D3Z2T9_MOUSE	Cdk1	Cyclin-dependent kinase 1 (Fragment)		0.250138	-0.151976	1	1	1	4.5	4.5	4.5	22.893	0.0022026	17.221	6989400000	149	27.3828	26.7068	26.5976	27.071	26.9345	26.8982	26.4382	27.5868	27.0311	27.4982
P11499	HS90B_MOUSE	Hsp90ab1	Heat shock protein HSP 90-beta		0.32373	-0.165419	31	31	18	45.7	45.7	29.8	83.28	0	323.31	5977000000	1178	26.3233	26.0245	25.6892	25.7016	26.4379	26.2668	25.8109	25.8707	26.6192	26.4359
P11672	NGAL_MOUSE	Lcn2	Neutrophil gelatinase-associated lipocalin		2.32761	0.822507	11	11	11	40	40	40	22.875	0	323.31	5699100000	1131	27.8714	28.3872	28.864	28.0673	28.0111	27.7012	27.4056	27.3908	27.0122	27.5786
P11679	K2C8_MOUSE	Krt8	Keratin, type II cytoskeletal 8		0	NaN	5	4	4	11	9.2	9.2	54.565	0.0017921	8.9938	12465000	7	NaN	NaN	NaN	NaN	NaN	NaN	NaN	NaN	NaN	NaN
P12032	TIMP1_MOUSE	Timp1	Metalloproteinase inhibitor 1		0.377927	0.315491	2	2	2	12.2	12.2	12.2	22.628	0.002907	5.0078	55118000	23	NaN	NaN	21.9012	21.7051	21.6284	21.2721	22.0572	21.7097	20.6788	NaN
P12382	PFKAL_MOUSE	Pfkl	ATP-dependent 6-phosphofructokinase, liver type		0.118724	0.0902699	13	13	13	21.5	21.5	21.5	85.359	0	68.11	182710000	112	23.4194	22.6557	22.7583	22.5188	23.3629	23.1722	23.067	22.0216	23.1738	22.8291
P13020	GELS_MOUSE	Gsn	Gelsolin		0.324328	-0.133702	15	15	10	29	29	19.9	85.941	0	323.31	2103800000	365	25.0535	25.3458	25.5078	25.645	24.8322	25.3596	25.6259	25.5965	25.0822	25.3886
P13707	GPDA_MOUSE	Gpd1	Glycerol-3-phosphate dehydrogenase [NAD(+)], cytoplasmic		0.193733	-0.144758	14	14	13	59.3	59.3	56.2	37.572	0	323.31	1514100000	368	25.0223	23.9412	23.9959	24.1864	24.8786	24.6969	24.4088	23.9128	25.082	24.6477
P14152	MDHC_MOUSE	Mdh1	Malate dehydrogenase, cytoplasmic		0.073512	-0.0433521	8	8	8	29.9	29.9	29.9	36.511	0	323.31	4740600000	846	26.6638	26.2643	25.8652	26.2225	26.4664	26.5177	26.1458	25.8952	26.8733	26.267
A0A1L1SRW0	A0A1L1SRW0_MOUSE	Rpsa	40S ribosomal protein SA (Fragment)		0	NaN	1	1	1	19.4	19.4	19.4	10.125	0.0098039	3.3912	1225600	2	NaN	NaN	NaN	NaN	NaN	NaN	NaN	NaN	NaN	NaN
P14211	CALR_MOUSE	Calr	Calreticulin		0.581466	-0.476699	9	9	9	34.9	34.9	34.9	47.994	0	147.72	625460000	160	23.4654	22.7318	22.6088	22.1578	24.0551	23.1447	22.8993	23.5447	24.0495	23.7641
P14847	CRP_MOUSE	Crp	C-reactive protein		0	NaN	2	2	2	10.7	10.7	10.7	25.36	0.0021834	16.904	17368000	16	NaN	NaN	NaN	NaN	NaN	NaN	NaN	NaN	NaN	NaN
P15105	GLNA_MOUSE	Glul	Glutamine synthetase		0	NaN	2	2	2	9.9	9.9	9.9	42.119	0.0016529	7.0199	6936000	4	NaN	NaN	NaN	NaN	NaN	NaN	NaN	NaN	NaN	NaN
P15535	B4GT1_MOUSE	B4galt1	Beta-1,4-galactosyltransferase 1		1.68093	-0.502919	8	8	8	26.1	26.1	26.1	44.411	0	323.31	609680000	228	25.1376	25.1017	25.1819	24.5967	25.3484	25.098	25.7023	25.6942	25.76	25.6265
P16125	LDHB_MOUSE	Ldhb	L-lactate dehydrogenase B chain		0.434302	-0.377067	8	7	7	28.4	24.9	24.9	36.572	0	53.337	86569000	39	22.4227	21.5025	21.753	22.1259	22.5508	22.3215	NaN	NaN	23.1755	21.8471
P16301	LCAT_MOUSE	Lcat	Phosphatidylcholine-sterol acyltransferase		0	NaN	2	2	2	7.1	7.1	7.1	49.746	0.001548	5.7604	11377000	10	NaN	NaN	NaN	NaN	NaN	NaN	NaN	NaN	NaN	NaN
P16675	PPGB_MOUSE	Ctsa	Lysosomal protective protein		0	NaN	3	3	3	6.3	6.3	6.3	53.844	0	63.673	262520000	39	24.2324	24.6139	24.5023	24.2604	23.8168	NaN	NaN	NaN	NaN	NaN
P16858	G3P_MOUSE	Gapdh	Glyceraldehyde-3-phosphate dehydrogenase		0.147319	0.108162	17	17	15	55.9	55.9	51.7	35.81	0	323.31	9094700000	1253	27.8209	27.3493	27.2447	27.2309	28.3487	27.7371	27.2285	26.9949	28.0309	27.4623
P17182	ENOA_MOUSE	Eno1	Alpha-enolase		0.200562	-0.106351	24	24	24	69.4	69.4	69.4	47.14	0	323.31	9289100000	1333	27.1293	26.5886	26.4554	26.4627	27.1613	26.7502	26.6176	26.6668	27.3941	26.9002
P17563	SBP1_MOUSE	Selenbp1	Methanethiol oxidase		0.15355	0.073088	7	7	7	22.5	22.5	22.5	52.513	0	24.018	57153000	28	22.8571	NaN	NaN	NaN	22.9689	22.7378	NaN	NaN	23.0991	22.6828
P17742	PPIA_MOUSE	Ppia	Peptidyl-prolyl cis-trans isomerase A		1.37603	-0.377019	8	8	8	61.6	61.6	61.6	17.971	0	323.31	4172400000	765	26.7862	26.4314	26.3997	26.4575	27.0536	27.12	26.843	26.7516	27.2372	27.0616
P17751	TPIS_MOUSE	Tpi1	Triosephosphate isomerase		0.100805	-0.0648045	10	10	10	51	51	51	26.712	0	323.31	1906800000	513	25.3001	24.8895	24.8567	24.9083	25.4649	25.3307	24.6477	24.7177	25.7185	25.3289
Q61696	HS71A_MOUSE	Hspa1a	Heat shock 70 kDa protein 1A		0	NaN	6	4	2	11.9	8.1	3.7	70.078	0.0018975	10.587	20186000	11	NaN	NaN	NaN	NaN	NaN	NaN	NaN	NaN	NaN	NaN
P17897	LYZ1_MOUSE	Lyz1	Lysozyme C-1		0	NaN	1	1	1	8.1	8.1	8.1	16.794	0.001845	9.7079	8387100	2	NaN	NaN	NaN	NaN	NaN	NaN	NaN	NaN	NaN	NaN
A0A075B5Q9	A0A075B5Q9_MOUSE	Ighv5-15	Immunoglobulin heavy variable 5-15		0	NaN	1	1	1	13.8	13.8	13.8	12.943	0	20.813	1587700	2	NaN	NaN	NaN	NaN	NaN	NaN	NaN	NaN	NaN	NaN
P18528	HVM57_MOUSE		Ig heavy chain V region 6.96		0	NaN	1	1	1	19.4	19.4	19.4	11.007	0	45.194	10468000	6	NaN	NaN	NaN	NaN	NaN	NaN	NaN	NaN	NaN	NaN
P18760	COF1_MOUSE	Cfl1	Cofilin-1		0.123985	0.0514759	7	7	7	48.8	48.8	48.8	18.559	0	262.51	328400000	113	23.1384	22.8775	22.7158	22.6988	23.4165	23.171	22.9845	22.7051	22.8625	22.8666
P19096	FAS_MOUSE	Fasn	Fatty acid synthase		0.008148	0.00764656	120	120	120	66.3	66.3	66.3	272.43	0	323.31	79739000000	9517	29.2068	28.9033	28.6153	28.6051	29.809	28.9931	28.6634	28.4743	29.7672	29.2032
P19157	GSTP1_MOUSE	Gstp1	Glutathione S-transferase P 1		2.44637	-0.75856	7	7	7	48.1	48.1	48.1	23.609	0	323.31	466840000	151	23.99	24.4884	24.1127	24.291	24.9655	25.2322	24.8775	25.0809	25.3093	25.1404
H7BX99	H7BX99_MOUSE	F2	Prothrombin		0.174979	-0.153887	18	18	18	36.5	36.5	36.5	70.211	0	323.31	1016100000	253	24.4985	25.3025	25.2491	25.4934	24.21	25.1514	25.5937	25.4142	24.2125	25.1513
P20029	BIP_MOUSE	Hspa5	Endoplasmic reticulum chaperone BiP		0.78109	-0.24186	22	20	20	40.2	36	36	72.421	0	323.31	1862500000	498	24.9815	24.7408	24.7827	24.506	25.3872	24.9851	25.1855	24.982	25.2552	25.1997
P20108	PRDX3_MOUSE	Prdx3	Thioredoxin-dependent peroxide reductase, mitochondrial		0	0.634605	6	6	6	30.4	30.4	30.4	28.127	0	41.641	37988000	19	22.3562	NaN	NaN	NaN	NaN	21.3452	NaN	NaN	22.098	NaN
P20918	PLMN_MOUSE	Plg	Plasminogen		0.036623	-0.0389133	20	20	20	35.1	35.1	35.1	90.807	0	323.31	1169200000	343	24.7019	25.2158	25.3978	25.509	24.1144	24.6916	25.7026	25.398	24.1902	25.1512
P21460	CYTC_MOUSE	Cst3	Cystatin-C		0.13309	0.0842892	8	8	8	49.3	49.3	49.3	15.531	0	323.31	2641200000	533	25.5506	25.7665	26.1894	26.2001	25.1987	25.4575	25.9598	25.9846	25.2464	25.8355
P21614	VTDB_MOUSE	Gc	Vitamin D-binding protein		0.152447	-0.10425	22	22	22	50.8	50.8	50.8	53.6	0	323.31	9386500000	1616	26.6116	27.3948	27.0851	27.307	26.3898	26.8281	27.346	27.4906	26.5096	27.1351
P21956	MFGM_MOUSE	Mfge8	Lactadherin		0.059733	0.0484898	18	18	18	41.7	41.7	41.7	51.24	0	323.31	8558400000	1134	27.4505	28.2059	28.5655	28.3399	27.6857	27.8633	28.6466	28.1737	27.4134	27.908
P22599	A1AT2_MOUSE	Serpina1b	Alpha-1-antitrypsin 1-2		0.206465	0.122842	21	10	10	52.8	25.7	25.7	45.974	0	323.31	10371000000	909	27.0398	27.9808	27.3543	27.5415	27.408	27.0885	27.4037	27.9146	26.8284	27.475
P22935	RABP2_MOUSE	Crabp2	Cellular retinoic acid-binding protein 2		0	NaN	2	2	2	21.7	21.7	21.7	15.746	0.0019531	11.366	19503000	14	NaN	NaN	NaN	NaN	NaN	NaN	NaN	NaN	NaN	NaN
Q543K9	Q543K9_MOUSE	Pnp	Purine nucleoside phosphorylase		0.0167485	0.0149189	8	8	8	35.6	35.6	35.6	32.263	0	31.373	139150000	61	22.8262	22.2059	22.1534	21.7747	22.9671	22.5455	NaN	21.8152	22.6833	22.4381
F6V9F1	F6V9F1_MOUSE	Pcmt1	Protein-L-isoaspartate(D-aspartate) O-methyltransferase (Fragment)		0	NaN	2	2	2	16.4	16.4	16.4	18.823	0.0029762	5.2228	15016000	5	NaN	NaN	NaN	NaN	NaN	NaN	NaN	NaN	NaN	NaN
P23591	FCL_MOUSE	Gfus	GDP-L-fucose synthase		0.464552	-0.393002	13	13	13	61.1	61.1	61.1	35.877	0	118.19	226190000	109	23.2268	22.3573	22.2987	22.345	23.3426	23.1178	22.2896	NaN	23.8542	23.1666
P23780	BGAL_MOUSE	Glb1	Beta-galactosidase		0	NaN	2	2	2	3.4	3.4	3.4	73.12	0.003003	5.2997	6154600	6	NaN	NaN	NaN	NaN	NaN	NaN	NaN	NaN	NaN	NaN
P23953	EST1C_MOUSE	Ces1c	Carboxylesterase 1C		0.161156	-0.0873013	24	24	15	50.7	50.7	38.8	61.055	0	323.31	12991000000	2033	27.7319	28.1671	28.1802	28.3265	27.6149	28.0732	28.1643	28.4731	27.5147	28.232
P24369	PPIB_MOUSE	Ppib	Peptidyl-prolyl cis-trans isomerase B		0	NaN	3	3	3	17.1	17.1	17.1	23.713	0.0017889	8.9547	20632000	18	19.9222	NaN	20.4235	20.656	19.4455	NaN	NaN	NaN	NaN	NaN
Q99LB4	Q99LB4_MOUSE	Capg	Capping protein (Actin filament), gelsolin-like		0	NaN	1	1	1	4	4	4	38.768	0.0040214	4.1281	1221300	2	NaN	NaN	NaN	NaN	NaN	NaN	NaN	NaN	NaN	NaN
P24527	LKHA4_MOUSE	Lta4h	Leukotriene A-4 hydrolase		0.464042	-0.545012	11	11	11	26	26	26	69.05	0	302.59	91163000	66	22.4419	NaN	22.2068	21.2346	22.8541	22.8033	21.6872	NaN	23.6573	22.7697
Q6PI17	Q6PI17_MOUSE	Timp2	Metalloproteinase inhibitor 2		0	NaN	2	2	2	6.8	6.8	6.8	24.356	0	204.21	52390000	25	21.4403	NaN	NaN	NaN	21.8026	NaN	NaN	NaN	NaN	NaN
P26262	KLKB1_MOUSE	Klkb1	Plasma kallikrein		0.43452	-0.315353	5	5	5	11.8	11.8	11.8	71.382	0.0019342	11.275	74887000	29	NaN	22.8939	NaN	22.5064	22.1991	22.3491	23.0809	23.4531	22.3549	23.0043
A0A087WP98	A0A087WP98_MOUSE	Ptma	Prothymosin alpha		0	NaN	1	1	1	24.1	24.1	24.1	6.4913	0	94.645	34230000	17	NaN	NaN	NaN	NaN	NaN	NaN	NaN	NaN	NaN	NaN
P26638	SYSC_MOUSE	Sars1	Serine--tRNA ligase, cytoplasmic		0.0280699	0.0182251	14	14	14	35.5	35.5	35.5	58.388	0	170.32	452790000	148	23.3877	22.8722	22.7074	22.5511	23.3381	23.1575	22.8598	22.4623	23.3484	22.9374
P26883	FKB1A_MOUSE	Fkbp1a	Peptidyl-prolyl cis-trans isomerase FKBP1A		0.795677	-0.283744	3	3	3	40.7	40.7	40.7	11.922	0	48.712	86679000	36	21.9332	21.6472	21.5254	21.6852	21.1874	22.0703	NaN	NaN	21.8127	21.7552
P27773	PDIA3_MOUSE	Pdia3	Protein disulfide-isomerase A3		0.413401	-0.387455	14	14	14	37	37	37	56.678	0	91.195	212920000	72	22.9244	22.3428	22.0935	21.2857	23.4311	22.4143	22.6547	22.36	23.4452	23.1405
P28271	ACOC_MOUSE	Aco1	Cytoplasmic aconitate hydratase		0.454518	-0.171026	21	21	21	33.5	33.5	33.5	98.124	0	323.31	551190000	209	25.0332	24.7873	24.7794	24.7673	25.4128	25.1982	25.222	24.7511	25.466	24.9978
P28474	ADHX_MOUSE	Adh5	Alcohol dehydrogenase class-3		0.605043	-0.481792	5	5	5	27.3	27.3	27.3	39.547	0	235.6	94148000	42	22.5404	21.5923	21.2426	NaN	22.2334	22.1053	NaN	NaN	22.5487	22.4979
P28665	MUG1_MOUSE	Mug1	Murinoglobulin-1		0.21293	-0.172871	30	30	30	31.5	31.5	31.5	165.3	0	323.31	1857900000	512	25.1943	26.302	25.9737	26.2653	25.1872	25.982	25.9988	26.6296	25.2842	25.8922
P29341	PABP1_MOUSE	Pabpc1	Polyadenylate-binding protein 1		0.16841	-0.109364	9	9	9	17.9	17.9	17.9	70.67	0.0022422	18.757	95790000	32	22.8736	NaN	NaN	NaN	23.2949	23.3909	NaN	NaN	23.2664	22.9235
A0A2I3BRG0	A0A2I3BRG0_MOUSE	Nedd8	NEDD8 (Fragment)		0	NaN	1	1	1	61.1	61.1	61.1	1.9311	0	21.009	21761000	30	NaN	NaN	NaN	NaN	NaN	NaN	NaN	NaN	NaN	NaN
P29699	FETUA_MOUSE	Ahsg	Alpha-2-HS-glycoprotein		0.256369	-0.174858	6	6	6	30.7	30.7	30.7	37.325	0	323.31	17056000000	1399	27.5745	28.2748	28.0324	28.2999	27.2719	27.9432	28.3731	28.5579	27.4067	28.0468
P29752	LALBA_MOUSE	Lalba	Alpha-lactalbumin		0.42795	-0.221082	5	5	5	22.4	22.4	22.4	16.26	0	323.31	14769000000	1598	27.5731	28.1016	28.1215	27.9992	27.3424	27.6453	28.2458	28.4372	27.6118	28.3032
P30115	GSTA3_MOUSE	Gsta3	Glutathione S-transferase A3		0	NaN	1	1	1	5.4	5.4	5.4	25.36	0.008794	3.5361	5605500	6	NaN	NaN	NaN	NaN	NaN	NaN	NaN	NaN	NaN	NaN
P30416	FKBP4_MOUSE	Fkbp4	Peptidyl-prolyl cis-trans isomerase FKBP4		0.849036	-0.374287	15	15	15	37.3	37.3	37.3	51.572	0	212.19	436310000	186	23.0923	22.5143	22.3262	22.3379	22.9961	22.9902	22.5505	22.9075	23.5354	23.1546
P31786	ACBP_MOUSE	Dbi	Acyl-CoA-binding protein		1.97413	-0.552486	3	3	3	41.4	41.4	41.4	10	0	323.31	2976100000	279	26.5836	25.9075	26.243	25.7937	25.7421	26.7418	26.4783	26.6554	26.6622	26.4947
P31938	MP2K1_MOUSE	Map2k1	Dual specificity mitogen-activated protein kinase kinase 1		0	0.0577393	4	4	4	14.5	14.5	14.5	43.474	0.0020619	13.838	18475000	13	NaN	NaN	NaN	NaN	21.4527	NaN	NaN	NaN	21.3949	NaN
P32261	ANT3_MOUSE	Serpinc1	Antithrombin-III		0.167697	-0.116717	21	21	21	50.1	50.1	50.1	52.003	0	323.31	10134000000	1259	27.1335	27.6055	27.8885	27.612	26.8653	27.4006	28.0075	27.8784	26.868	27.5339
P33622	APOC3_MOUSE	Apoc3	Apolipoprotein C-III		0	NaN	2	2	2	27.3	27.3	27.3	10.982	0.0020367	13.23	85262000	32	22.1119	NaN	22.3749	23.1836	22.6458	NaN	NaN	NaN	NaN	NaN
H7BX22	H7BX22_MOUSE	Ranbp1	Ran-specific GTPase-activating protein		0	NaN	2	2	2	22.2	22.2	22.2	17.887	0.0029197	5.0752	12220000	7	NaN	NaN	NaN	NaN	NaN	NaN	NaN	NaN	NaN	NaN
P34884	MIF_MOUSE	Mif	Macrophage migration inhibitory factor		0.663207	-0.376873	3	3	3	35.7	35.7	35.7	12.504	0	20.679	128960000	78	23.4082	23.4308	NaN	23.3914	24.2539	23.9638	23.6358	23.8083	24.6951	23.8868
P35293	RAB18_MOUSE	Rab18	Ras-related protein Rab-18		0.078978	-0.0246699	8	8	8	44.2	44.2	44.2	23.035	0	73.275	98677000	46	21.745	22.081	22.1238	22.1439	22.0285	22.0578	22.241	NaN	22.0847	21.8129
P35486	ODPA_MOUSE	Pdha1	Pyruvate dehydrogenase E1 component subunit alpha, somatic form, mitochondrial		0.0161067	0.0308695	4	4	4	11.8	11.8	11.8	43.231	0.0021142	15.367	44962000	24	21.2814	NaN	NaN	NaN	21.8098	20.977	NaN	NaN	22.0525	NaN
P35505	FAAA_MOUSE	Fah	Fumarylacetoacetase		0.0443417	-0.038763	15	15	15	60.6	60.6	60.6	46.175	0	323.31	1140100000	375	25.8114	25.4821	24.8842	24.8563	26.0008	25.5395	25.3029	24.8487	26.0881	25.4495
P35700	PRDX1_MOUSE	Prdx1	Peroxiredoxin-1		0.0386164	-0.0310776	14	14	13	62.8	62.8	62.8	22.176	0	323.31	3375800000	551	26.4576	25.7891	26.2713	26.0582	26.9196	26.5511	26.0806	25.7265	26.95	26.3429
P35846	FOLR1_MOUSE	Folr1	Folate receptor alpha		0.00259453	-0.00207481	7	7	7	25.9	25.9	25.9	29.449	0	62.806	1306800000	118	24.6449	25.1437	25.1946	24.8113	24.6959	25.0054	25.3103	25.2757	23.9681	24.9413
P36993	PPM1B_MOUSE	Ppm1b	Protein phosphatase 1B		0	NaN	2	2	2	8.5	8.5	8.5	42.795	0.0089172	3.6453	2450700	2	NaN	NaN	NaN	NaN	NaN	NaN	NaN	NaN	NaN	NaN
P38647	GRP75_MOUSE	Hspa9	Stress-70 protein, mitochondrial		0.0727346	0.0961456	10	10	10	20	20	20	73.46	0	63.843	106200000	49	22.1031	NaN	20.7336	NaN	21.9758	21.3143	NaN	NaN	21.8143	21.3956
P40124	CAP1_MOUSE	Cap1	Adenylyl cyclase-associated protein 1		0	NaN	5	5	5	16.2	16.2	16.2	51.564	0.0019569	11.653	16777000	12	NaN	NaN	NaN	NaN	NaN	NaN	NaN	NaN	NaN	NaN
P40142	TKT_MOUSE	Tkt	Transketolase		0.109028	-0.0667225	21	21	21	52.8	52.8	52.8	67.63	0	323.31	7676500000	1236	27.4529	27.0477	26.8797	27.0476	27.5038	27.7091	27.0443	26.7847	27.7152	27.012
D3Z041	D3Z041_MOUSE	Acsl1	Long-chain-fatty-acid--CoA ligase 1		0.407272	0.570637	17	17	17	30.2	30.2	30.2	78.034	0	51.919	213180000	78	22.6565	22.6108	21.2645	22.0661	24.823	22.6672	21.8281	21.78	22.6245	21.6679
A0A3Q4EC00	A0A3Q4EC00_MOUSE	Eci1	Enoyl-CoA delta isomerase 1, mitochondrial		0	0.20042	3	3	3	16.1	16.1	16.1	27.842	0.0017422	8.0691	19519000	8	22.439	NaN	NaN	NaN	NaN	NaN	NaN	NaN	22.2386	NaN
P42232	STA5B_MOUSE	Stat5b	Signal transducer and activator of transcription 5B		0	NaN	2	2	2	3.2	3.2	3.2	90.001	0.0099626	3.4787	1155900	3	NaN	NaN	NaN	NaN	NaN	NaN	NaN	NaN	NaN	NaN
P42703	LIFR_MOUSE	Lifr	Leukemia inhibitory factor receptor		0.570884	-0.395369	9	9	9	11.3	11.3	11.3	122.57	0	27.297	190800000	72	21.6023	22.6119	22.713	23.2184	22.2205	22.8629	22.9998	23.3358	22.156	22.9885
Q8CFZ6	Q8CFZ6_MOUSE	Clec3b	C-type lectin domain family 3, member b		0	NaN	2	2	2	12.9	12.9	12.9	22.255	0.0015723	6.2069	5436900	7	NaN	NaN	NaN	NaN	NaN	NaN	NaN	NaN	NaN	NaN
P43883	PLIN2_MOUSE	Plin2	Perilipin-2		0.391452	0.137831	14	14	14	41.9	41.9	41.9	46.646	0	323.31	437150000	255	22.7148	22.6315	23.1437	22.5951	23.0232	22.7935	23.0089	22.5216	22.3612	22.7338
P45376	ALDR_MOUSE	Akr1b1	Aldo-keto reductase family 1 member B1		0.202023	0.201227	5	5	5	25	25	25	35.732	0	75.792	160060000	58	23.0791	NaN	NaN	21.8995	23.0968	22.4383	22.0236	22.1543	23.15	22.6865
P45700	MA1A1_MOUSE	Man1a1	Mannosyl-oligosaccharide 1,2-alpha-mannosidase IA		0	NaN	2	2	2	3.7	3.7	3.7	73.275	0.0089974	3.7091	4045600	6	NaN	NaN	NaN	NaN	NaN	NaN	NaN	NaN	NaN	NaN
P45952	ACADM_MOUSE	Acadm	Medium-chain specific acyl-CoA dehydrogenase, mitochondrial		0	NaN	2	2	2	6.4	6.4	6.4	46.481	0.0077821	3.8159	1188100	4	NaN	NaN	NaN	NaN	NaN	NaN	NaN	NaN	NaN	NaN
P46412	GPX3_MOUSE	Gpx3	Glutathione peroxidase 3		1.1642	0.672908	5	5	5	29.2	29.2	29.2	25.424	0.0020704	13.916	85789000	55	22.9608	23.4029	23.1119	NaN	NaN	22.105	22.8905	22.6745	21.8458	22.9122
G3UZD3	G3UZD3_MOUSE	Rab11b	Ras-related protein Rab-11B		0	0.00132179	4	4	4	22.8	22.8	22.8	21.771	0.0018762	10.261	49476000	26	NaN	NaN	NaN	NaN	21.6437	NaN	NaN	NaN	21.6424	NaN
A0A0G2JEU1	A0A0G2JEU1_MOUSE	Aldh2	Aldehyde dehydrogenase, mitochondrial		0	NaN	7	7	7	22.7	22.7	22.7	51.349	0	29.239	33491000	21	22.3963	NaN	NaN	NaN	21.4004	NaN	NaN	NaN	NaN	NaN
P47753	CAZA1_MOUSE	Capza1	F-actin-capping protein subunit alpha-1		0.649453	-0.363198	7	5	5	39.9	30.4	30.4	32.939	0	26.109	35264000	16	22.2101	NaN	NaN	NaN	21.9628	22.618	NaN	NaN	22.2814	NaN
P47754	CAZA2_MOUSE	Capza2	F-actin-capping protein subunit alpha-2		0.210784	-0.186373	7	7	5	37.1	37.1	27.6	32.967	0.0022573	19.144	85896000	55	22.3558	21.5503	NaN	NaN	22.3623	22.6169	21.9813	21.756	22.944	22.081
P47757	CAPZB_MOUSE	Capzb	F-actin-capping protein subunit beta		0.781047	-0.38155	8	8	1	37.2	37.2	4.7	31.345	0	323.31	154510000	57	22.0496	21.7771	21.6366	21.847	22.3498	22.4159	21.81	21.8684	22.985	22.4884
P47791	GSHR_MOUSE	Gsr	Glutathione reductase, mitochondrial		0	NaN	3	3	3	8.4	8.4	8.4	53.662	0.0016129	6.5786	11520000	10	NaN	NaN	NaN	NaN	NaN	NaN	NaN	NaN	NaN	NaN
P47856	GFPT1_MOUSE	Gfpt1	Glutamine--fructose-6-phosphate aminotransferase [isomerizing] 1		0	NaN	5	5	5	7.9	7.9	7.9	78.538	0.001773	8.648	9681100	7	NaN	NaN	NaN	NaN	NaN	NaN	NaN	NaN	NaN	NaN
P47968	RPIA_MOUSE	Rpia	Ribose-5-phosphate isomerase		0	NaN	3	3	3	14.2	14.2	14.2	32.45	0	62.182	33899000	26	23.0135	NaN	NaN	NaN	23.1867	NaN	NaN	NaN	NaN	NaN
A0A1Y7VJ48	A0A1Y7VJ48_MOUSE	Tbca	Tubulin-specific chaperone A		0	NaN	1	1	1	19	19	19	9.9271	0	31.527	7877900	11	NaN	NaN	NaN	NaN	NaN	NaN	NaN	NaN	NaN	NaN
P48678	LMNA_MOUSE	Lmna	Prelamin-A/C		0	NaN	2	2	2	3	3	3	74.237	0.005298	4.0172	1735400	2	NaN	NaN	NaN	NaN	NaN	NaN	NaN	NaN	NaN	NaN
P48758	CBR1_MOUSE	Cbr1	Carbonyl reductase [NADPH] 1		0.633485	-0.577429	12	12	12	50.2	50.2	50.2	30.641	0	64.715	216250000	88	23.9953	22.6903	22.4906	22.4706	23.5801	23.8895	22.8531	NaN	24.2578	23.4909
P49182	HEP2_MOUSE	Serpind1	Heparin cofactor 2		0.194982	0.116165	11	11	11	33.7	33.7	33.7	54.496	0	323.31	1694300000	353	25.017	25.5087	25.437	25.3794	24.5902	25.0223	25.3367	25.4242	24.4838	25.0844
P50247	SAHH_MOUSE	Ahcy	Adenosylhomocysteinase		0	NaN	3	3	3	8.3	8.3	8.3	47.688	0.0030166	5.4156	10576000	9	NaN	NaN	NaN	NaN	NaN	NaN	NaN	NaN	NaN	NaN
P50404	SFTPD_MOUSE	Sftpd	Pulmonary surfactant-associated protein D		0	NaN	2	2	2	7.8	7.8	7.8	37.688	0.0028944	4.992	23985000	13	NaN	NaN	NaN	NaN	NaN	NaN	NaN	NaN	NaN	NaN
G3UZ26	G3UZ26_MOUSE	Shmt1	Serine hydroxymethyltransferase (Fragment)		0	-0.0807447	6	6	6	18.5	18.5	18.5	48.334	0.002193	17.061	14022000	17	NaN	NaN	NaN	NaN	20.2563	20.1088	NaN	NaN	20.5652	NaN
P50516	VATA_MOUSE	Atp6v1a	V-type proton ATPase catalytic subunit A		0.354135	0.271114	4	4	4	6.6	6.6	6.6	68.325	0.0018939	10.569	59401000	28	23.2133	22.3811	NaN	NaN	22.7004	22.1192	NaN	NaN	22.8315	22.5306
P50580	PA2G4_MOUSE	Pa2g4	Proliferation-associated protein 2G4		0	NaN	2	2	2	7.1	7.1	7.1	43.698	0.004065	4.251	3260500	4	NaN	NaN	NaN	NaN	NaN	NaN	NaN	NaN	NaN	NaN
P51150	RAB7A_MOUSE	Rab7a	Ras-related protein Rab-7a		0.272314	0.100484	4	4	4	23.2	23.2	23.2	23.489	0.0021786	16.887	29859000	30	NaN	20.9114	21.1223	20.7808	20.8301	20.9665	NaN	20.6549	NaN	NaN
A0A0R4J083	A0A0R4J083_MOUSE	Acadl	Long-chain specific acyl-CoA dehydrogenase, mitochondrial		0	NaN	3	3	3	8.1	8.1	8.1	47.896	0.0016051	6.4553	15211000	8	NaN	NaN	NaN	NaN	NaN	NaN	NaN	NaN	NaN	NaN
P51855	GSHB_MOUSE	Gss	Glutathione synthetase		0.14418	0.166462	5	5	5	9.3	9.3	9.3	52.246	0.0018622	10.115	41798000	15	21.6347	NaN	NaN	NaN	21.5831	21.0436	NaN	NaN	21.8413	NaN
P51885	LUM_MOUSE	Lum	Lumican		0.34433	0.145714	5	5	3	15.7	15.7	10.1	38.265	0	23.257	113420000	27	NaN	NaN	22.891	22.576	NaN	NaN	22.5872	NaN	NaN	22.5884
P51910	APOD_MOUSE	Apod	Apolipoprotein D		0	NaN	4	4	4	28.6	28.6	28.6	21.53	0.0018248	9.2755	24777000	14	20.197	20.9944	NaN	NaN	NaN	NaN	NaN	NaN	NaN	NaN
P52196	THTR_MOUSE	Tst	Thiosulfate sulfurtransferase		0	0.460091	2	2	2	12.5	12.5	12.5	33.466	0.0015898	6.3792	29147000	9	21.2629	NaN	NaN	NaN	NaN	20.8028	NaN	NaN	NaN	NaN
P52430	PON1_MOUSE	Pon1	Serum paraoxonase/arylesterase 1		0.312635	-0.200762	5	5	5	16.9	16.9	16.9	39.565	0	53.906	128720000	50	22.0736	22.5465	22.7523	22.2628	21.663	22.3658	22.7807	22.9772	21.818	22.3602
P52480	KPYM_MOUSE	Pkm	Pyruvate kinase PKM		0.122463	-0.0861454	28	28	28	69.3	69.3	69.3	57.844	0	323.31	12482000000	1673	26.9734	26.4465	26.438	26.0776	27.2895	26.8382	26.512	26.2938	27.2123	26.7993
J3QQ30	J3QQ30_MOUSE	Pitpna	Phosphatidylinositol transfer protein alpha isoform		0.070791	0.0513533	4	4	4	24.7	24.7	24.7	31.837	0	27.665	78816000	25	22.3912	NaN	NaN	NaN	21.6702	21.8155	21.7316	22.201	22.2431	21.9055
P53811	PIPNB_MOUSE	Pitpnb	Phosphatidylinositol transfer protein beta isoform		0	NaN	2	2	2	7.7	7.7	7.7	31.487	0.0040706	4.2947	6410600	7	NaN	NaN	NaN	NaN	NaN	NaN	NaN	NaN	NaN	NaN
P53994	RAB2A_MOUSE	Rab2a	Ras-related protein Rab-2A		0	NaN	3	3	3	19.3	19.3	19.3	23.547	0	24.488	15030000	14	NaN	NaN	NaN	NaN	NaN	NaN	21.6505	NaN	20.9836	NaN
P54071	IDHP_MOUSE	Idh2	Isocitrate dehydrogenase [NADP], mitochondrial		0	-0.649809	4	4	4	10.2	10.2	10.2	50.906	0.0017036	7.5119	16266000	11	NaN	NaN	NaN	NaN	21.3061	NaN	NaN	NaN	21.9559	NaN
P86547	OSTC2_MOUSE	Bglap2	Osteocalcin-2		0	NaN	1	1	1	16.8	16.8	16.8	10.459	0.0097324	3.3706	8409500	7	NaN	NaN	NaN	NaN	NaN	NaN	NaN	NaN	NaN	NaN
P54822	PUR8_MOUSE	Adsl	Adenylosuccinate lyase		0	NaN	2	2	2	10.1	10.1	10.1	54.866	0.0018797	10.41	5833600	4	NaN	NaN	NaN	NaN	NaN	NaN	NaN	NaN	NaN	NaN
A2A5K2	A2A5K2_MOUSE	Pltp	Phospholipid transfer protein		0	NaN	2	2	2	5.7	5.7	5.7	49.022	0.0040761	4.304	5498400	4	NaN	NaN	NaN	NaN	NaN	NaN	NaN	NaN	NaN	NaN
P55264	ADK_MOUSE	Adk	Adenosine kinase		0	NaN	6	6	6	24.4	24.4	24.4	40.148	0	75.334	18100000	7	NaN	NaN	NaN	NaN	NaN	NaN	NaN	NaN	NaN	NaN
P55302	AMRP_MOUSE	Lrpap1	Alpha-2-macroglobulin receptor-associated protein		0	NaN	2	2	2	7.5	7.5	7.5	42.215	0.0041725	4.5467	10584000	9	NaN	NaN	NaN	NaN	NaN	NaN	NaN	NaN	NaN	NaN
E9Q4B9	E9Q4B9_MOUSE	Arpp19	cAMP-regulated phosphoprotein 19		0	0.651802	2	2	2	43.7	43.7	43.7	7.6566	0.0042313	4.7375	27900000	13	20.837	NaN	NaN	NaN	NaN	NaN	NaN	NaN	NaN	20.1852
P56389	CDD_MOUSE	Cda	Cytidine deaminase		0	NaN	2	2	2	19.9	19.9	19.9	16.131	0.0042918	4.9055	13928000	12	NaN	NaN	NaN	NaN	NaN	NaN	NaN	NaN	NaN	NaN
Q3U4W8	Q3U4W8_MOUSE	Usp5	Ubiquitin carboxyl-terminal hydrolase		0.474265	-0.407309	6	6	6	9	9	9	93.354	0	50.991	52962000	33	21.3901	20.8939	NaN	NaN	21.7508	21.4622	NaN	NaN	22.307	21.4876
P56480	ATPB_MOUSE	Atp5f1b	ATP synthase subunit beta, mitochondrial		0.084638	-0.211777	9	9	9	25	25	25	56.3	0	27.831	123200000	52	24.0116	21.7919	21.74	20.9033	22.6325	NaN	22.0862	NaN	22.7691	NaN
P56677	ST14_MOUSE	St14	Suppressor of tumorigenicity 14 protein homolog		0.501423	0.17308	4	4	4	8.3	8.3	8.3	94.654	0.0019231	11.075	54733000	31	22.3208	22.3635	22.4379	22.4499	21.9528	22.1939	22.5224	22.0712	21.6924	22.1796
P56812	PDCD5_MOUSE	Pdcd5	Programmed cell death protein 5		0	NaN	2	2	2	17.5	17.5	17.5	14.275	0.0029455	5.1203	10422000	11	NaN	NaN	NaN	NaN	NaN	NaN	NaN	NaN	NaN	NaN
P57759	ERP29_MOUSE	Erp29	Endoplasmic reticulum resident protein 29		0	NaN	3	3	3	14.1	14.1	14.1	28.823	0.0015456	5.7567	4212600	3	NaN	NaN	NaN	NaN	NaN	NaN	NaN	NaN	NaN	NaN
Q80T06	Q80T06_MOUSE	Eef1d	Elongation factor 1-delta		0.108226	0.0330653	8	6	1	32	27.8	8.5	31.292	0	33.892	92323000	36	21.6139	21.6134	21.1819	21.4171	21.3974	21.5014	NaN	NaN	21.3345	21.3992
P57780	ACTN4_MOUSE	Actn4	Alpha-actinin-4		0.0250983	-0.0207655	20	20	19	29.4	29.4	28.2	104.98	0	132.71	166580000	91	22.4494	22.1632	22.144	22.1369	22.3534	22.9423	21.7314	NaN	22.6648	21.7421
P58044	IDI1_MOUSE	Idi1	Isopentenyl-diphosphate Delta-isomerase 1		0	NaN	2	2	2	9.3	9.3	9.3	26.289	0.0040431	4.1853	9778600	5	NaN	NaN	NaN	NaN	NaN	NaN	NaN	NaN	NaN	NaN
P58252	EF2_MOUSE	Eef2	Elongation factor 2		0.307714	-0.157244	37	37	37	43.8	43.8	43.8	95.313	0	323.31	6651700000	1305	26.3846	25.8089	25.981	25.8239	26.4129	26.1757	26.0289	25.8359	26.863	26.294
P60335	PCBP1_MOUSE	Pcbp1	Poly(rC)-binding protein 1		0.386587	-0.274201	8	8	6	40.7	40.7	32	37.497	0	323.31	141280000	74	23.2771	22.5621	22.4129	22.4303	23.3828	23.5273	22.6595	22.5439	23.722	22.9835
P60710	ACTB_MOUSE	Actb	Actin, cytoplasmic 1		0.239279	-0.0829628	18	18	1	62.1	62.1	4.5	41.736	0	323.31	7193000000	1139	28.0077	27.8316	28.1276	27.848	27.9728	28.4053	28.1402	27.6549	28.1618	27.8403
P60843	IF4A1_MOUSE	Eif4a1	Eukaryotic initiation factor 4A-I		0.0381643	-0.0399632	14	14	9	41.1	41.1	23.4	46.153	0	304.5	740500000	251	24.464	23.775	24.0027	23.6851	25.018	24.4205	23.4413	23.7841	24.9337	24.5651
A0A494BAN1	A0A494BAN1_MOUSE	Ube2d2a	Ubiquitin-conjugating enzyme E2D 2A (Fragment)		0	NaN	2	2	2	31.5	31.5	31.5	10.508	0.001626	6.7931	27098000	11	NaN	NaN	NaN	NaN	NaN	22.6001	NaN	NaN	22.8635	NaN
P61082	UBC12_MOUSE	Ube2m	NEDD8-conjugating enzyme Ubc12		0	NaN	2	2	2	10.9	10.9	10.9	20.9	0.0079156	3.9694	2708900	2	NaN	NaN	NaN	NaN	NaN	NaN	NaN	NaN	NaN	NaN
A0A0J9YUI1	A0A0J9YUI1_MOUSE	Ube2k	Ubiquitin-conjugating enzyme E2 K		0.337737	-0.316784	5	5	5	44.6	44.6	44.6	15.81	0	85.085	68610000	39	21.4481	20.7649	21.0728	21.4036	22.0376	21.336	NaN	NaN	21.9884	NaN
P61089	UBE2N_MOUSE	Ube2n	Ubiquitin-conjugating enzyme E2 N		0.293016	-0.258617	5	5	5	41.4	41.4	41.4	17.138	0	24.821	124010000	52	23.9817	22.9963	23.1236	22.6587	23.8944	23.715	NaN	NaN	23.8076	23.246
P61202	CSN2_MOUSE	Cops2	COP9 signalosome complex subunit 2		0	NaN	2	2	2	4.5	4.5	4.5	51.596	0.0088832	3.6206	4502400	3	NaN	NaN	NaN	NaN	NaN	NaN	NaN	NaN	NaN	NaN
P84078	ARF1_MOUSE	Arf1	ADP-ribosylation factor 1		0.0521321	0.063895	10	10	6	59.7	59.7	29.8	20.697	0	243.58	349570000	171	23.6003	23.609	23.374	22.994	23.6917	23.9091	21.805	23.4335	24.1847	23.6171
P61211	ARL1_MOUSE	Arl1	ADP-ribosylation factor-like protein 1		0	-0.0035305	3	3	3	20.4	20.4	20.4	20.411	0.0015823	6.3292	11846000	11	21.4866	NaN	NaN	NaN	NaN	NaN	NaN	NaN	NaN	21.4901
P61294	RAB6B_MOUSE	Rab6b	Ras-related protein Rab-6B		0	NaN	2	2	2	12	12	12	23.461	0	78.878	91985000	30	NaN	NaN	NaN	NaN	NaN	NaN	NaN	NaN	NaN	NaN
P61750	ARF4_MOUSE	Arf4	ADP-ribosylation factor 4		0	NaN	6	2	2	42.2	12.2	12.2	20.396	0.0021645	16.408	34797000	7	NaN	NaN	NaN	NaN	NaN	NaN	NaN	NaN	NaN	NaN
A0A2R8VJV3	A0A2R8VJV3_MOUSE	Copz1	Coatomer subunit zeta		0	NaN	2	2	2	17.9	17.9	17.9	9.5418	0.0041265	4.4482	7364700	5	NaN	NaN	NaN	NaN	NaN	NaN	NaN	NaN	NaN	NaN
G3UZX6	G3UZX6_MOUSE	Sumo3	Small ubiquitin-related modifier 3 (Fragment)		0	NaN	1	1	1	25.5	25.5	25.5	5.2631	0.0088272	3.5803	7254700	5	NaN	NaN	NaN	NaN	NaN	NaN	NaN	NaN	NaN	NaN
P61961	UFM1_MOUSE	Ufm1	Ubiquitin-fold modifier 1		0.627383	0.366097	3	3	3	58.8	58.8	58.8	9.1175	0	109.43	181360000	59	25.1563	NaN	24.5428	24.5498	25.4965	24.6307	24.1509	NaN	24.8408	24.6587
P61982	1433G_MOUSE	Ywhag	14-3-3 protein gamma		0	NaN	4	2	2	20.6	13.4	13.4	28.302	0	311.06	20721000	19	NaN	NaN	NaN	NaN	NaN	NaN	NaN	NaN	NaN	NaN
P62137	PP1A_MOUSE	Ppp1ca	Serine/threonine-protein phosphatase PP1-alpha catalytic subunit		0	NaN	3	3	3	12.4	12.4	12.4	37.54	0.0015625	6.0546	2189100	5	NaN	NaN	NaN	NaN	NaN	NaN	NaN	NaN	NaN	NaN
P62254	UB2G1_MOUSE	Ube2g1	Ubiquitin-conjugating enzyme E2 G1		0	NaN	2	2	2	12.9	12.9	12.9	19.509	0.0079051	3.958	0	2	NaN	NaN	NaN	NaN	NaN	NaN	NaN	NaN	NaN	NaN
P62259	1433E_MOUSE	Ywhae	14-3-3 protein epsilon		0.38175	-0.21704	7	5	5	34.9	27.8	27.8	29.174	0	259.8	359160000	142	23.0221	22.5769	22.744	22.4914	22.9024	23.235	22.4982	22.3096	23.3685	23.4107
P63330	PP2AA_MOUSE	Ppp2ca	Serine/threonine-protein phosphatase 2A catalytic subunit alpha isoform		0	NaN	3	3	3	16.2	16.2	16.2	35.608	0.0018727	10.218	5558600	7	NaN	NaN	NaN	NaN	NaN	NaN	NaN	NaN	NaN	NaN
A0A1Y7VMK3	A0A1Y7VMK3_MOUSE	Hpcal1	Hippocalcin-like protein 1 (Fragment)		0	NaN	1	1	1	17.3	17.3	17.3	19.661	0.0096618	3.304	54000000	2	NaN	NaN	NaN	NaN	NaN	NaN	NaN	NaN	NaN	NaN
P62774	MTPN_MOUSE	Mtpn	Myotrophin		1.23052	-0.819992	3	3	3	33.1	33.1	33.1	12.861	0	323.31	91245000	43	21.2016	NaN	NaN	20.5717	21.3719	21.4984	NaN	21.5788	22.495	21.9013
P62806	H4_MOUSE	H4c1	Histone H4		0	NaN	1	1	1	9.7	9.7	9.7	11.367	0.0019724	11.859	7261600	4	NaN	NaN	NaN	NaN	NaN	NaN	NaN	NaN	NaN	NaN
M0QWG9	M0QWG9_MOUSE	Wfdc18	WAP four-disulfide core domain protein 18 (Fragment)		0	NaN	3	3	3	47.9	47.9	47.9	7.5278	0.0021459	16.259	258500000	18	NaN	NaN	NaN	NaN	NaN	NaN	NaN	NaN	NaN	NaN
P62814	VATB2_MOUSE	Atp6v1b2	V-type proton ATPase subunit B, brain isoform		0	NaN	4	4	4	11.2	11.2	11.2	56.55	0	97.924	15277000	11	NaN	NaN	NaN	NaN	NaN	NaN	NaN	NaN	21.9151	21.9947
Q5SW88	Q5SW88_MOUSE	Rab1a	RAB1A, member RAS oncogene family		1.62727	-0.270303	6	6	3	46	46	27.2	22.372	0	27.653	169440000	64	22.8923	23.0323	22.6998	22.6931	22.5521	23.1158	22.8851	22.9846	23.1401	23.0956
P62827	RAN_MOUSE	Ran	GTP-binding nuclear protein Ran		0.970122	-0.908434	6	6	6	31.5	31.5	31.5	24.423	0	39.446	94221000	42	NaN	21.7631	NaN	NaN	22.666	23.2285	NaN	NaN	23.3423	22.798
P62869	ELOB_MOUSE	Elob	Elongin-B		0	0.743502	2	2	2	28.8	28.8	28.8	13.17	0.0020243	13.105	12932000	9	NaN	NaN	NaN	NaN	21.4628	NaN	NaN	NaN	20.7193	NaN
P62897	CYC_MOUSE	Cycs	Cytochrome c, somatic		0.0100902	-0.0133541	6	6	6	49.5	49.5	49.5	11.605	0	126.26	898870000	132	27.1352	25.93	24.9742	25.2998	26.7669	26.57	25.7011	26.3321	25.857	25.7126
P62960	YBOX1_MOUSE	Ybx1	Y-box-binding protein 1		0	-0.203223	4	4	4	18.9	18.9	18.9	35.73	0	75.584	90516000	27	22.1919	20.9302	NaN	NaN	21.8288	NaN	NaN	NaN	21.8535	NaN
P63001	RAC1_MOUSE	Rac1	Ras-related C3 botulinum toxin substrate 1		0	NaN	3	3	3	18.8	18.8	18.8	21.45	0.0030675	5.6668	25883000	8	NaN	NaN	NaN	NaN	NaN	NaN	NaN	NaN	NaN	NaN
P63005	LIS1_MOUSE	Pafah1b1	Platelet-activating factor acetylhydrolase IB subunit beta		0	NaN	5	5	5	15.4	15.4	15.4	46.67	0.0020921	14.823	17511000	13	NaN	NaN	NaN	NaN	NaN	NaN	NaN	NaN	NaN	NaN
P63017	HSP7C_MOUSE	Hspa8	Heat shock cognate 71 kDa protein		0.073082	-0.0346863	23	23	20	41.2	41.2	37.5	70.87	0	323.31	5791200000	1239	25.9851	25.8149	25.8565	25.9094	26.5795	26.1296	25.9687	25.7532	26.3532	26.1141
P63028	TCTP_MOUSE	Tpt1	Translationally-controlled tumor protein		0.0296976	0.0265877	4	4	4	24.4	24.4	24.4	19.462	0	323.31	1107900000	203	24.6028	25.0309	24.4376	24.6177	25.6329	24.5204	24.205	25.1666	25.4634	24.8334
P63038	CH60_MOUSE	Hspd1	60 kDa heat shock protein, mitochondrial		0.0943562	-0.100672	14	14	14	34.4	34.4	34.4	60.955	0	323.31	347720000	170	24.3794	22.9737	23.0313	23.2309	24.2464	23.7755	23.4265	23.3152	24.5963	23.2516
A0A0G2JH04	A0A0G2JH04_MOUSE	Eif4e	Eukaryotic translation initiation factor 4E		0	NaN	4	4	4	32.4	32.4	32.4	21.009	0.0018692	10.151	44050000	12	NaN	NaN	NaN	NaN	NaN	NaN	NaN	NaN	NaN	NaN
P63085	MK01_MOUSE	Mapk1	Mitogen-activated protein kinase 1		0	NaN	3	3	3	12.6	12.6	12.6	41.275	0.0030488	5.5554	8239400	7	NaN	NaN	NaN	NaN	NaN	NaN	NaN	NaN	NaN	NaN
P63101	1433Z_MOUSE	Ywhaz	14-3-3 protein zeta/delta		0.814601	-0.364144	8	8	6	42.9	42.9	35.5	27.771	0	323.31	1202800000	306	25.8035	25.2984	25.2099	25.2672	26.1116	26.0373	25.6897	25.5021	26.3529	25.9294
A0A0A0MQM0	A0A0A0MQM0_MOUSE	Eif5a	Eukaryotic translation initiation factor 5A (Fragment)		0.521773	-0.497132	8	8	8	61.7	61.7	61.7	16.302	0	86.244	510340000	108	24.784	22.8561	NaN	23.8467	24.4409	24.5492	24.2565	23.879	25.2034	24.5071
P63260	ACTG_MOUSE	Actg1	Actin, cytoplasmic 2		0	NaN	18	1	1	62.1	4.5	4.5	41.792	0	66.075	6058700	14	NaN	NaN	NaN	NaN	NaN	NaN	NaN	NaN	NaN	NaN
P68134	ACTS_MOUSE	Acta1	Actin, alpha skeletal muscle		0.432687	-0.203587	10	2	2	28.9	10.3	10.3	42.051	0	323.31	691710000	56	24.9966	24.8097	24.2332	24.3079	24.5731	24.7553	24.6113	NaN	25.228	24.5561
A0A338P702	A0A338P702_MOUSE	Ube2l3	Ubiquitin-conjugating enzyme E2 L3		0.569737	0.288495	2	2	2	28.9	28.9	28.9	13.173	0.0015552	5.8341	79955000	37	23.1456	NaN	NaN	22.586	23.3519	22.8702	22.7063	NaN	22.9409	22.4401
P68254	1433T_MOUSE	Ywhaq	14-3-3 protein theta		0.539398	0.448479	7	5	5	38	30.6	30.6	27.778	0	266.92	77256000	39	22.5977	21.1706	NaN	NaN	22.3651	21.5131	21.6066	NaN	21.7787	21.4855
P68368	TBA4A_MOUSE	Tuba4a	Tubulin alpha-4A chain		0	-0.453854	10	2	2	33.9	5.4	5.4	49.924	0.0030075	5.3139	27874000	14	20.822	NaN	NaN	NaN	NaN	21.2758	NaN	NaN	NaN	NaN
P68372	TBB4B_MOUSE	Tubb4b	Tubulin beta-4B chain		0.228554	-0.235031	19	19	4	56	56	16	49.83	0	218.63	446540000	206	24.5527	23.9271	23.8109	23.8761	23.4389	25.0985	24.5626	23.0386	24.5641	23.517
P68510	1433F_MOUSE	Ywhah	14-3-3 protein eta		0	NaN	4	2	2	17.9	10.6	10.6	28.211	0.0030817	5.7275	5432400	8	NaN	NaN	NaN	NaN	NaN	NaN	NaN	NaN	NaN	NaN
P70124	SPB5_MOUSE	Serpinb5	Serpin B5		0.507757	-0.232928	12	12	12	41.9	41.9	41.9	42.111	0	150.19	530810000	218	23.4762	22.7882	22.7801	22.6332	23.2544	23.578	22.9768	22.8541	23.5114	23.1763
P70158	ASM3A_MOUSE	Smpdl3a	Acid sphingomyelinase-like phosphodiesterase 3a		1.35173	0.926088	8	8	8	23.8	23.8	23.8	49.857	0	65.897	170900000	59	24.0683	24.3698	23.8332	23.2957	23.3477	NaN	22.9113	NaN	22.8024	NaN
P70168	IMB1_MOUSE	Kpnb1	Importin subunit beta-1		0	NaN	2	2	2	3.8	3.8	3.8	97.183	0.0029895	5.2622	3650700	2	NaN	NaN	NaN	NaN	NaN	NaN	NaN	NaN	NaN	NaN
P70202	LXN_MOUSE	Lxn	Latexin		0.370946	-0.361461	3	3	3	17.6	17.6	17.6	25.492	0.0017094	7.5765	32696000	20	20.7052	NaN	20.0824	NaN	NaN	NaN	NaN	NaN	20.9443	20.5663
P70227	ITPR3_MOUSE	Itpr3	Inositol 1,4,5-trisphosphate receptor type 3		0	NaN	2	2	2	1	1	1	304.27	0.0097561	3.3788	305400000	2	NaN	NaN	NaN	NaN	NaN	NaN	NaN	NaN	NaN	NaN
P70274	SEPP1_MOUSE	Selenop	Selenoprotein P		0.293891	0.143232	4	4	4	12.1	12.1	12.1	42.705	0	136.68	110450000	32	22.1564	22.259	22.2258	22.1742	21.9612	22.3967	NaN	22.129	21.5107	NaN
P70277	SIA7B_MOUSE	St6galnac2	Alpha-N-acetylgalactosaminide alpha-2,6-sialyltransferase 2		0	NaN	2	2	2	8.3	8.3	8.3	42.481	0.0041958	4.6873	5177500	4	NaN	NaN	NaN	NaN	NaN	NaN	NaN	NaN	NaN	NaN
P70296	PEBP1_MOUSE	Pebp1	Phosphatidylethanolamine-binding protein 1		0.244818	-0.172013	8	8	8	73.8	73.8	73.8	20.83	0	323.31	758440000	151	24.7457	24.4933	24.7058	24.1871	25.371	24.8431	24.3334	24.5135	25.5229	25.15
P70349	HINT1_MOUSE	Hint1	Histidine triad nucleotide-binding protein 1		0.00837342	-0.00652885	5	5	5	71.4	71.4	71.4	13.777	0	113.12	408260000	184	24.2166	23.8456	23.3483	23.7503	24.3878	23.6991	24.1794	23.3535	24.461	23.8881
A0A0R4J0S2	A0A0R4J0S2_MOUSE	Igfals	Insulin-like growth factor-binding protein complex acid labile subunit		0.0575077	-0.0468102	23	23	23	43	43	43	66.989	0	323.31	3617400000	739	26.2886	26.9348	27.1422	27.4342	26.5117	26.8635	27.4277	27.2273	26.2493	26.7778
P70441	NHRF1_MOUSE	Slc9a3r1	Na(+)/H(+) exchange regulatory cofactor NHE-RF1		1.71448	-0.48358	6	6	6	24.8	24.8	24.8	38.6	0	93.587	135890000	60	22.3219	22.1378	21.8919	21.7467	21.7389	22.7107	22.2391	NaN	22.3195	22.5348
Q60817	NACA_MOUSE	Naca	Nascent polypeptide-associated complex subunit alpha		0.440248	0.284032	2	2	2	13.5	13.5	13.5	23.384	0	234.32	75626000	35	21.0224	20.9469	20.4049	20.4228	21.5545	20.6043	NaN	20.6815	NaN	20.473
A0A140LHE6	A0A140LHE6_MOUSE	Irf3	Interferon regulatory factor 3 (Fragment)		0	NaN	2	2	2	13.1	13.1	13.1	17.941	0.0078844	3.9426	940180	4	NaN	NaN	NaN	NaN	NaN	NaN	NaN	NaN	NaN	NaN
P70677	CASP3_MOUSE	Casp3	Caspase-3		0.885664	-0.536695	5	5	5	21.3	21.3	21.3	31.474	0	28.693	102450000	50	22.4024	21.892	21.6963	21.8742	22.6881	22.1863	NaN	NaN	23.022	22.7336
P70699	LYAG_MOUSE	Gaa	Lysosomal alpha-glucosidase		0	NaN	2	2	2	2.5	2.5	2.5	106.25	0.0041322	4.4634	15603000	4	NaN	NaN	NaN	NaN	NaN	NaN	NaN	NaN	NaN	NaN
P81117	NUCB2_MOUSE	Nucb2	Nucleobindin-2		0.0233125	-0.0149647	21	21	21	46.7	46.7	46.7	50.304	0	323.31	6486700000	1006	26.0257	26.1499	26.6364	26.4462	25.713	26.0236	26.73	26.3696	25.9176	26.0052
D6RHA2	D6RHA2_MOUSE	Renbp	GlcNAc 2-epimerase		0	NaN	1	1	1	4.5	4.5	4.5	48.509	0.0053191	4.0383	2170900	3	NaN	NaN	NaN	NaN	NaN	NaN	NaN	NaN	NaN	NaN
P97290	IC1_MOUSE	Serping1	Plasma protease C1 inhibitor		0.00286246	-0.00191536	12	12	12	30.8	30.8	30.8	55.584	0	323.31	1634300000	320	24.965	25.7754	25.4337	25.4206	25.4991	25.2813	25.5404	26.0393	24.9195	25.3229
P97298	PEDF_MOUSE	Serpinf1	Pigment epithelium-derived factor		0.635877	0.421765	7	7	7	18	18	18	46.233	0	38.056	73147000	37	20.7522	21.7183	21.1626	21.5633	20.6757	NaN	NaN	20.9855	20.3423	20.9301
P97313	PRKDC_MOUSE	Prkdc	DNA-dependent protein kinase catalytic subunit		0	NaN	2	2	2	1.1	1.1	1.1	471.47	0.0098522	3.4278	240390000	2	NaN	NaN	NaN	NaN	NaN	NaN	NaN	NaN	NaN	NaN
G3UXY0	G3UXY0_MOUSE	Psme1	Proteasome activator complex subunit 1		0	0.711853	5	5	5	19.5	19.5	19.5	26.092	0.0018382	9.5276	29240000	14	NaN	NaN	NaN	NaN	22.9205	NaN	NaN	NaN	22.2086	NaN
P97372	PSME2_MOUSE	Psme2	Proteasome activator complex subunit 2		0	0.195203	3	3	3	18	18	18	27.057	0.0017007	7.4872	23989000	17	NaN	22.5348	NaN	NaN	22.2938	NaN	NaN	NaN	22.2191	NaN
P97807	FUMH_MOUSE	Fh	Fumarate hydratase, mitochondrial		0	0.192791	6	6	6	18.1	18.1	18.1	54.356	0	33.983	21713000	16	22.5078	NaN	NaN	NaN	21.838	NaN	NaN	NaN	21.9801	NaN
P97821	CATC_MOUSE	Ctsc	Dipeptidyl peptidase 1		0	0.739586	6	6	6	19.9	19.9	19.9	52.376	0	235.97	182880000	56	23.8935	23.5868	24.4877	22.8153	23.4763	NaN	22.9123	NaN	NaN	NaN
D3Z111	D3Z111_MOUSE	Lypla1	Acyl-protein thioesterase 1		0	NaN	2	2	2	18.9	18.9	18.9	21.151	0.0016807	7.2567	16102000	8	NaN	NaN	NaN	NaN	NaN	NaN	NaN	NaN	NaN	NaN
E9PX84	E9PX84_MOUSE	Dab2	Disabled homolog 2		0.646905	-0.497854	7	7	7	17.8	17.8	17.8	56.503	0	35.683	106160000	55	21.7014	21.7956	NaN	21.2411	22.3206	22.1529	21.3914	22.0759	23.0776	22.6149
P99027	RLA2_MOUSE	Rplp2	60S acidic ribosomal protein P2		0	NaN	3	3	3	25.2	25.2	25.2	11.651	0.0019084	10.807	31801000	16	20.6178	20.4512	20.1187	19.8385	20.4872	NaN	NaN	NaN	NaN	NaN
P99029	PRDX5_MOUSE	Prdx5	Peroxiredoxin-5, mitochondrial		0.750849	-0.395362	8	8	8	41	41	41	21.897	0	30.157	413440000	139	23.9197	22.7996	23.0492	22.9706	23.716	23.8743	23.6157	23.1845	24.085	23.6725
Q00519	XDH_MOUSE	Xdh	Xanthine dehydrogenase/oxidase		0.624595	0.19851	24	24	24	28.5	28.5	28.5	146.56	0	323.31	1123900000	370	24.9212	24.3296	24.8239	24.4988	25.0307	24.6533	24.4025	24.3798	24.3962	24.7798
Q00612	G6PD1_MOUSE	G6pdx	Glucose-6-phosphate 1-dehydrogenase X		0.290122	-0.174811	27	27	27	66	66	66	59.262	0	323.31	2594200000	551	26.0325	25.7761	25.5017	25.2428	26.2386	25.9257	25.6103	25.5263	26.5501	26.0533
Q00623	APOA1_MOUSE	Apoa1	Apolipoprotein A-I		0.0842661	-0.0624668	15	15	15	45.1	45.1	45.1	30.615	0	323.31	31924000000	1989	28.185	28.9248	28.8717	28.6172	27.8611	28.263	28.8164	29.1004	28.1431	28.4493
Q00724	RET4_MOUSE	Rbp4	Retinol-binding protein 4		0	0.0340939	3	3	3	18.9	18.9	18.9	23.206	0	135.36	62795000	28	NaN	23.7078	NaN	NaN	NaN	NaN	NaN	23.6737	NaN	NaN
Q00897	A1AT4_MOUSE	Serpina1d	Alpha-1-antitrypsin 1-4		0.192984	-0.126323	24	24	11	56.4	56.4	27.6	45.998	0	323.31	45616000000	3793	28.8089	29.4253	29.4571	29.4541	28.636	29.1111	29.0779	29.942	28.8475	29.4345
Q00898	A1AT5_MOUSE	Serpina1e	Alpha-1-antitrypsin 1-5		0.25742	-0.324327	15	9	9	36.6	23.2	23.2	45.891	0	323.31	1220300000	259	24.0499	25.3339	24.8431	25.2726	22.7195	24.4957	24.2185	24.8466	24.9729	25.307
Q9WVF5	Q9WVF5_MOUSE	Egfr	Receptor protein-tyrosine kinase		0.31867	-0.23859	6	6	6	9.3	9.3	9.3	72.906	0	45.494	149820000	101	23.3224	23.4183	23.8699	24.3651	23.6287	24.1467	23.1858	24.6886	23.5686	24.2075
Q01339	APOH_MOUSE	Apoh	Beta-2-glycoprotein 1		0.175992	0.19505	11	11	11	36.5	36.5	36.5	38.618	0	295.29	1296100000	287	23.9399	25.6897	25.3935	25.6145	24.1578	24.5252	24.8041	25.522	24.1777	24.7911
Q01853	TERA_MOUSE	Vcp	Transitional endoplasmic reticulum ATPase		0.0756059	-0.0517624	8	8	8	11.9	11.9	11.9	89.321	0	21.582	68811000	42	21.7043	21.6664	NaN	21.9527	22.5068	22.1727	NaN	NaN	22.024	21.8311
Q02053	UBA1_MOUSE	Uba1	Ubiquitin-like modifier-activating enzyme 1		0.0190026	0.0465855	16	16	16	21.7	21.7	21.7	117.81	0	323.31	227180000	128	22.751	21.7149	20.8908	21.8139	23.0406	22.9763	20.7693	19.7178	23.6611	22.8537
Q02596	GLCM1_MOUSE	Glycam1	Glycosylation-dependent cell adhesion molecule 1		0.638065	0.54417	10	10	3	77.5	77.5	36.4	16.209	0	323.31	381630000000	11366	31.6425	31.5753	32.5074	33.1267	32.1541	31.6223	32.7399	31.5885	30.8551	31.4794
A0A1C7CYU3	A0A1C7CYU3_MOUSE	Nucb1	Nucleobindin-1		0	NaN	3	3	3	9.9	9.9	9.9	52.997	0.0016667	7.1246	33993000	11	21.3502	NaN	21.5884	NaN	NaN	NaN	NaN	NaN	NaN	NaN
A0A0G2JGC6	A0A0G2JGC6_MOUSE	Csn1s2a	Alpha-S2-casein-like A		0.388612	0.240808	3	3	3	30.2	30.2	30.2	19.333	0	323.31	1602400000	162	25.5181	26.1674	26.0555	26.051	25.2692	25.4275	26.2644	25.1812	25.1484	25.8358
Q03265	ATPA_MOUSE	Atp5f1a	ATP synthase subunit alpha, mitochondrial		0.387661	0.505769	8	8	8	20.4	20.4	20.4	59.752	0	51.296	66584000	29	22.2084	NaN	NaN	NaN	21.089	21.0023	NaN	NaN	21.6324	20.7942
Q03734	SPA3M_MOUSE	Serpina3m	Serine protease inhibitor A3M		0	0.17672	12	3	3	32.5	10.3	10.3	47.064	0.0019646	11.754	31136000	21	22.3254	22.7884	NaN	NaN	21.3398	21.9745	NaN	NaN	NaN	NaN
A0A3Q4EBT3	A0A3Q4EBT3_MOUSE	Pfdn6	Prefoldin subunit 6		0	NaN	2	2	2	29.9	29.9	29.9	9.7743	0.0015773	6.3022	2414900	4	NaN	NaN	NaN	NaN	NaN	NaN	NaN	NaN	NaN	NaN
Q05816	FABP5_MOUSE	Fabp5	Fatty acid-binding protein 5		0.146298	0.109551	7	7	7	65.9	65.9	65.9	15.137	0	323.31	335060000	72	23.159	22.6045	23.0808	22.6052	23.452	23.108	22.7002	NaN	23.4063	22.2685
Q06770	CBG_MOUSE	Serpina6	Corticosteroid-binding globulin		0.860122	-0.517924	6	6	6	17.9	17.9	17.9	44.769	0	181.81	916080000	164	24.1949	25.0945	25.4358	24.9777	24.7606	25.5473	25.7777	25.8789	24.5482	25.3009
Q06890	CLUS_MOUSE	Clu	Clusterin		1.33123	0.442661	21	21	21	41.7	41.7	41.7	51.655	0	323.31	50380000000	2915	29.3484	29.6524	29.5713	29.3287	29.0263	29.2296	29.2577	29.0093	28.4344	28.7827
Q07456	AMBP_MOUSE	Ambp	Protein AMBP		0.0122782	0.00832901	6	6	6	17.5	17.5	17.5	39.029	0	174.61	216310000	69	23.4415	23.6637	24.0191	24.3262	23.4243	23.6798	24.0763	24.0858	23.2661	23.7253
A0A1B0GS13	A0A1B0GS13_MOUSE	Bax	Apoptosis regulator BAX (Fragment)		0	NaN	2	2	2	23.7	23.7	23.7	12.513	0.0041551	4.5271	4173800	4	NaN	NaN	NaN	NaN	NaN	NaN	NaN	NaN	NaN	NaN
Q11011	PSA_MOUSE	Npepps	Puromycin-sensitive aminopeptidase		0.221517	-0.396174	14	14	14	17.4	17.4	17.4	103.32	0	44.552	302700000	51	23.3541	23.0157	21.6323	NaN	24.0524	22.9185	NaN	NaN	24.3054	23.0056
Q14AE4	WFDC3_MOUSE	Wfdc3	WAP four-disulfide core domain protein 3		0.606988	0.22494	3	3	3	45.4	45.4	45.4	13.718	0	323.31	1544100000	138	28.2164	28.4141	27.7334	28.4946	27.7558	27.8691	27.9253	28.0792	27.6074	28.0087
Q19LI2	A1BG_MOUSE	A1bg	Alpha-1B-glycoprotein		0.0859967	0.147472	17	17	17	39.1	39.1	39.1	56.553	0	323.31	7497100000	564	25.4315	26.6488	28.1375	28.5653	27.3003	27.2021	27.3639	27.5524	25.9201	27.3077
A0A0U1RPV6	A0A0U1RPV6_MOUSE	Trpm1	Transient receptor potential cation channel subfamily M member 1		0	NaN	2	2	2	1.8	1.8	1.8	170.94	0.0016313	6.8226	288740000	17	NaN	NaN	NaN	NaN	NaN	NaN	NaN	NaN	NaN	NaN
Q32KG4	RTL9_MOUSE	Rtl9	Retrotransposon Gag-like protein 9		0	NaN	2	2	2	2.8	2.8	2.8	138.47	0.0041899	4.633	23025000	3	NaN	NaN	NaN	NaN	NaN	NaN	NaN	NaN	NaN	NaN
Q3TW96	UAP1L_MOUSE	Uap1l1	UDP-N-acetylhexosamine pyrophosphorylase-like protein 1		0.642755	-0.46366	9	9	8	20.7	20.7	18.1	56.613	0	44.22	102420000	52	22.1763	21.2548	21.1813	NaN	21.8505	21.9172	21.6426	NaN	22.7936	21.9642
Q3U5Q7	CMPK2_MOUSE	Cmpk2	UMP-CMP kinase 2, mitochondrial		0	NaN	3	3	3	9.2	9.2	9.2	50.036	0.0029155	5.0483	3524300	4	NaN	NaN	NaN	NaN	NaN	NaN	NaN	NaN	NaN	NaN
Q3UGR5	HDHD2_MOUSE	Hdhd2	Haloacid dehalogenase-like hydrolase domain-containing protein 2		0	NaN	2	2	2	18.5	18.5	18.5	28.73	0	38.183	12065000	8	NaN	NaN	NaN	NaN	NaN	22.2698	NaN	NaN	22.6778	NaN
Q3ULJ0	GPD1L_MOUSE	Gpd1l	Glycerol-3-phosphate dehydrogenase 1-like protein		1.00122	-0.408943	9	8	8	26.8	23.6	23.6	38.225	0	28.929	177600000	62	22.8332	21.9541	22.1092	22.2581	22.5209	22.9986	NaN	22.3414	22.8361	22.8001
Q3UM45	PP1R7_MOUSE	Ppp1r7	Protein phosphatase 1 regulatory subunit 7		0	-0.372477	6	6	6	14.1	14.1	14.1	41.291	0.0020202	12.851	22115000	20	NaN	NaN	NaN	NaN	20.7677	21.1402	NaN	NaN	NaN	NaN
Q3UPH1	PRRC1_MOUSE	Prrc1	Protein PRRC1		0	NaN	3	3	3	12.9	12.9	12.9	46.297	0.0019194	11.07	9653800	8	20.5068	NaN	NaN	NaN	20.5552	NaN	NaN	NaN	NaN	NaN
S4R2A9	S4R2A9_MOUSE	Sec31a	Protein transport protein Sec31A (Fragment)		0	-0.276421	6	6	6	8.6	8.6	8.6	100.98	0.002045	13.31	39534000	13	NaN	NaN	NaN	NaN	21.7363	NaN	NaN	NaN	22.0127	NaN
A0A1W2P7X0	A0A1W2P7X0_MOUSE	Abracl	Costars family protein ABRACL (Fragment)		0	-1.03979	2	2	2	43.9	43.9	43.9	6.4374	0	29.748	20039000	14	NaN	NaN	NaN	NaN	21.19	NaN	NaN	NaN	22.2298	NaN
F8WGL9	F8WGL9_MOUSE	Cdv3	Protein CDV3		0	NaN	1	1	1	21.1	21.1	21.1	11.85	0.0016584	7.0809	21176000	9	NaN	NaN	NaN	NaN	NaN	NaN	NaN	NaN	NaN	NaN
F8WHR6	F8WHR6_MOUSE	Ddx46	RNA helicase		0	NaN	2	2	2	2.5	2.5	2.5	117	0.0040928	4.3823	86732000	5	NaN	NaN	NaN	NaN	NaN	NaN	NaN	NaN	NaN	NaN
Q571E4	GALNS_MOUSE	Galns	N-acetylgalactosamine-6-sulfatase		0	NaN	6	6	6	15	15	15	57.673	0.0021368	16.136	42592000	27	NaN	21.7327	22.3711	NaN	21.5017	NaN	NaN	NaN	NaN	NaN
J3QNE8	J3QNE8_MOUSE	Slc38a10	Putative sodium-coupled neutral amino acid transporter 10		0	NaN	2	2	2	2.3	2.3	2.3	117.14	0.0053405	4.0959	5203500	8	NaN	NaN	NaN	NaN	NaN	NaN	NaN	NaN	NaN	NaN
Q5MJS3	FA20C_MOUSE	Fam20c	Extracellular serine/threonine protein kinase FAM20C		0	NaN	2	2	2	4.3	4.3	4.3	65.765	0.0042614	4.7988	38054000	15	21.3258	NaN	NaN	21.9359	NaN	NaN	NaN	NaN	NaN	NaN
Q5SWU9	ACACA_MOUSE	Acaca	Acetyl-CoA carboxylase 1		0.956222	1.00717	44	44	37	27.2	27.2	23	265.25	0	166.27	488330000	191	23.71	23.2348	22.9836	21.9363	24.0543	23.1129	21.1693	NaN	22.5328	21.8915
Q5XJY5	COPD_MOUSE	Arcn1	Coatomer subunit delta		0	NaN	5	5	5	11.4	11.4	11.4	57.229	0.0017762	8.6999	9007500	10	NaN	NaN	NaN	NaN	NaN	20.791	20.0763	NaN	NaN	NaN
Q60590	A1AG1_MOUSE	Orm1	Alpha-1-acid glycoprotein 1		0.258025	0.255464	12	12	7	36.2	36.2	19.3	23.895	0	323.31	6841200000	908	27.6287	27.4735	28.5311	29.1191	27.7169	27.7832	28.5008	28.1967	26.9281	27.7833
Q60648	SAP3_MOUSE	Gm2a	Ganglioside GM2 activator		1.07419	0.670539	9	9	9	42	42	42	20.824	0	286.03	908090000	229	24.908	24.9101	25.7971	25.3746	24.1722	24.1566	24.872	24.8417	23.9288	24.0102
F7BX26	F7BX26_MOUSE	Ppp5c	Serine/threonine-protein phosphatase (Fragment)		0	NaN	2	2	2	6.7	6.7	6.7	54.205	0.0053262	4.0543	13835000	4	NaN	NaN	NaN	NaN	NaN	NaN	NaN	NaN	NaN	NaN
Q60864	STIP1_MOUSE	Stip1	Stress-induced-phosphoprotein 1		0	-0.774022	6	6	6	16.4	16.4	16.4	62.581	0	23.762	55752000	24	21.1344	21.0144	21.0816	21.0655	21.8311	NaN	NaN	NaN	21.9994	NaN
A2AUR3	A2AUR3_MOUSE	Pter	Parathion hydrolase-related protein (Fragment)		0	NaN	2	2	2	8.7	8.7	8.7	35.855	0.0040595	4.2392	802590	3	NaN	NaN	NaN	NaN	NaN	NaN	NaN	NaN	NaN	NaN
Q60994	ADIPO_MOUSE	Adipoq	Adiponectin		0.53014	-0.386661	4	4	4	13.8	13.8	13.8	26.809	0.0022831	19.946	136200000	20	NaN	23.7249	23.8461	NaN	NaN	NaN	24.4405	23.9039	NaN	NaN
Q61024	ASNS_MOUSE	Asns	Asparagine synthetase [glutamine-hydrolyzing]		0.0630221	-0.139755	15	15	15	38.3	38.3	38.3	64.282	0	219.05	366900000	149	23.0883	21.8537	21.5518	21.3746	23.967	22.4063	22.1539	20.4643	24.1047	23.4048
Q61035	HARS1_MOUSE	Hars1	Histidine--tRNA ligase, cytoplasmic		0.392141	-0.157225	8	8	8	17.1	17.1	17.1	57.432	0.0022523	18.945	54808000	29	21.4731	20.9372	NaN	NaN	21.3061	21.3137	NaN	NaN	21.512	21.3624
Q61081	CDC37_MOUSE	Cdc37	Hsp90 co-chaperone Cdc37		0	NaN	2	2	2	10	10	10	44.593	0.0041494	4.5243	4498200	5	NaN	NaN	NaN	NaN	NaN	NaN	NaN	NaN	NaN	NaN
Q61112	CAB45_MOUSE	Sdf4	45 kDa calcium-binding protein		0.328599	0.26195	6	6	6	20.2	20.2	20.2	42.064	0	86.174	124530000	45	21.9399	22.0808	22.4078	22.3526	21.3814	NaN	NaN	NaN	21.5236	22.0175
Q61129	CFAI_MOUSE	Cfi	Complement factor I		0.169071	0.136184	9	9	9	21.4	21.4	21.4	67.26	0	188.5	892390000	206	25.1816	25.7682	25.8104	26.1388	24.9203	25.5585	25.9738	25.7948	24.8625	24.9486
G3X9T8	G3X9T8_MOUSE	Cp	Ceruloplasmin		0.31209	0.174738	40	40	40	46.2	46.2	46.2	121.08	0	323.31	6558600000	1308	26.271	26.9055	26.7627	26.7521	26.1497	26.5975	26.7345	26.5113	25.667	26.4571
Q61171	PRDX2_MOUSE	Prdx2	Peroxiredoxin-2		0.039036	-0.032299	7	7	7	57.1	57.1	57.1	21.778	0	323.31	1084200000	179	24.7276	24.1041	24.2045	24.1822	24.9093	24.5662	24.4336	23.631	25.123	24.5355
D3Z2X5	D3Z2X5_MOUSE	Pafah1b3	Platelet-activating factor acetylhydrolase IB subunit gamma (Fragment)		0.139861	0.0835902	5	5	5	62.9	62.9	62.9	15.893	0	25.515	57274000	31	22.4002	NaN	NaN	22.5202	23.0783	22.5537	NaN	NaN	22.7202	22.474
A0A1L1SVK0	A0A1L1SVK0_MOUSE	Pafah1b2	Platelet-activating factor acetylhydrolase IB subunit beta (Fragment)		1.69394	0.430532	3	3	3	28.9	28.9	28.9	22.056	0	74.16	65737000	30	24.0205	NaN	NaN	NaN	24.0122	23.6499	23.5399	NaN	23.7563	23.3972
E9PZ00	E9PZ00_MOUSE	Psap	Prosaposin		0	NaN	4	4	4	10.2	10.2	10.2	60.672	0.0018349	9.4647	140890000	33	23.4823	23.9406	22.9038	23.3781	23.0533	NaN	NaN	NaN	NaN	NaN
Q61233	PLSL_MOUSE	Lcp1	Plastin-2		0	NaN	6	6	6	12.4	12.4	12.4	70.148	0.002008	12.415	15050000	9	NaN	NaN	NaN	NaN	NaN	NaN	NaN	NaN	NaN	NaN
Q61247	A2AP_MOUSE	Serpinf2	Alpha-2-antiplasmin		0.02132	0.0122719	11	11	11	28.9	28.9	28.9	54.971	0	323.31	2370600000	338	26.4571	27.0509	26.7341	26.8554	26.5267	26.5466	26.717	27.1796	26.2013	26.9184
Q61316	HSP74_MOUSE	Hspa4	Heat shock 70 kDa protein 4		0.071775	-0.15099	20	20	19	33.8	33.8	32.1	94.132	0	114.94	185780000	123	22.1839	21.491	20.2895	20.7751	23.0173	22.0617	21.2069	19.8426	23.4105	21.9898
E9QLQ3	E9QLQ3_MOUSE	Pde3b	Phosphodiesterase		0	NaN	1	1	1	2.3	2.3	2.3	122.07	0.0017699	8.6007	0	1	NaN	NaN	NaN	NaN	NaN	NaN	NaN	NaN	NaN	NaN
Q61425	HCDH_MOUSE	Hadh	Hydroxyacyl-coenzyme A dehydrogenase, mitochondrial		0	NaN	1	1	1	8.3	8.3	8.3	34.463	0.0021277	15.75	3123600	2	NaN	NaN	NaN	NaN	NaN	NaN	NaN	NaN	NaN	NaN
D3Z0U9	D3Z0U9_MOUSE	Ecm1	Extracellular matrix protein 1 (Fragment)		1.11822	-0.567581	5	5	5	31.5	31.5	31.5	28.347	0.002079	14.383	58304000	25	NaN	21.707	21.7476	21.5794	20.9836	21.8663	22.4144	NaN	NaN	21.9352
Q61555	FBN2_MOUSE	Fbn2	Fibrillin-2		0	NaN	2	2	2	2	2	2	313.82	0.0053548	4.1078	24465000	5	NaN	NaN	NaN	NaN	NaN	NaN	NaN	NaN	NaN	NaN
Q61581	IBP7_MOUSE	Igfbp7	Insulin-like growth factor-binding protein 7		0	NaN	3	3	3	16.4	16.4	16.4	28.969	0.0020408	13.264	22077000	10	NaN	NaN	NaN	NaN	NaN	NaN	NaN	NaN	NaN	NaN
Q61585	G0S2_MOUSE	G0s2	G0/G1 switch protein 2		0	NaN	2	2	2	11.7	11.7	11.7	11.118	0.0016556	7.0496	74126000	26	21.5875	22.5011	22.5713	NaN	21.9362	NaN	NaN	NaN	NaN	NaN
Q61598	GDIB_MOUSE	Gdi2	Rab GDP dissociation inhibitor beta		0.619657	0.198894	24	24	21	62.7	62.7	51.9	50.537	0	323.31	1572100000	476	25.7924	25.5211	25.4948	25.5414	26.0912	25.6398	25.159	25.3236	25.7401	25.584
Q61646	HPT_MOUSE	Hp	Haptoglobin		0	NaN	4	4	4	13.3	13.3	13.3	38.752	0.0019417	11.297	6921100	6	NaN	NaN	NaN	NaN	NaN	NaN	NaN	NaN	NaN	NaN
E9Q0U7	E9Q0U7_MOUSE	Hsph1	Heat shock protein 105 kDa		0	0.955862	8	7	7	13.6	11.9	11.9	91.677	0	38.925	14323000	15	NaN	NaN	NaN	NaN	21.3597	NaN	NaN	NaN	20.4038	NaN
Q61702	ITIH1_MOUSE	Itih1	Inter-alpha-trypsin inhibitor heavy chain H1		0.831325	-0.522182	16	16	16	23.4	23.4	23.4	101.07	0	178.85	365950000	146	22.7875	23.3033	23.0971	23.5207	22.2497	23.525	23.9503	23.9055	22.6229	23.5656
Q61703	ITIH2_MOUSE	Itih2	Inter-alpha-trypsin inhibitor heavy chain H2		0.0954904	0.0565529	11	11	11	17.5	17.5	17.5	105.93	0	323.31	1217100000	301	24.4306	24.8975	24.8425	24.911	24.3757	24.4514	24.9555	25.0941	24.0614	24.6122
G3UY13	G3UY13_MOUSE	Il1rap	Interleukin-1 receptor accessory protein		0.0702368	-0.0283909	4	4	4	10.1	10.1	10.1	39.881	0.0018215	9.2338	69302000	27	21.4645	21.8092	21.8628	21.8269	21.8169	NaN	22.0954	21.705	21.4556	21.8819
Q61753	SERA_MOUSE	Phgdh	D-3-phosphoglycerate dehydrogenase		0.528804	-0.326329	14	14	14	29.6	29.6	29.6	56.585	0	323.31	1008600000	202	23.85	23.4794	23.1598	22.9622	24.117	23.726	23.4702	23.497	24.5589	23.948
Q61768	KINH_MOUSE	Kif5b	Kinesin-1 heavy chain		0	NaN	3	3	3	3.5	3.5	3.5	109.55	0.0020576	13.609	3226100	7	NaN	NaN	NaN	NaN	NaN	NaN	NaN	NaN	NaN	NaN
Q61805	LBP_MOUSE	Lbp	Lipopolysaccharide-binding protein		2.41515	0.943214	9	9	9	22	22	22	53.055	0	150.18	656520000	169	24.8423	25.0973	25.1087	25.2323	24.3543	24.1777	24.0605	24.1936	23.2918	24.1951
Q61838	PZP_MOUSE	Pzp	Pregnancy zone protein		0.106216	0.0926331	40	40	40	37.4	37.4	37.4	165.85	0	323.31	3153800000	812	24.8531	25.7218	25.3434	25.4059	24.7597	25.2925	25.4761	25.5095	24.0561	25.2867
Q61990	PCBP2_MOUSE	Pcbp2	Poly(rC)-binding protein 2		0	0.298383	4	2	2	16.6	8	8	38.221	0.0015601	5.8902	13981000	18	NaN	NaN	NaN	NaN	22.0788	21.8581	NaN	NaN	21.7028	NaN
Q62159	RHOC_MOUSE	Rhoc	Rho-related GTP-binding protein RhoC		0	NaN	4	4	4	22.8	22.8	22.8	22.006	0.0016367	6.9434	10024000	10	NaN	NaN	NaN	NaN	NaN	NaN	NaN	NaN	NaN	NaN
Q62165	DAG1_MOUSE	Dag1	Dystroglycan		0	NaN	4	4	4	6	6	6	96.904	0	51.011	23187000	16	NaN	NaN	NaN	21.7268	21.5742	NaN	NaN	NaN	NaN	NaN
Q62264	THRSP_MOUSE	Thrsp	Thyroid hormone-inducible hepatic protein		0.649898	-0.350988	3	3	3	32.7	32.7	32.7	17.093	0	323.31	947040000	195	24.9346	24.9593	24.5536	24.6078	25.224	25.3853	24.4126	24.9809	25.7771	25.4784
Q62348	TSN_MOUSE	Tsn	Translin		0.147119	-0.280565	7	7	7	37.3	37.3	37.3	26.201	0	26.279	47324000	26	21.5183	NaN	NaN	NaN	23.2426	22.3659	NaN	NaN	23.0439	22.5733
D3Z125	D3Z125_MOUSE	Tpd52	Tumor protein D52 (Fragment)		0.914626	-0.321779	3	3	3	30.7	30.7	30.7	19.417	0	21.341	160730000	51	22.4856	22.8829	22.3052	22.563	22.9947	23.247	22.5545	22.7745	23.2432	23.0212
Q62426	CYTB_MOUSE	Cstb	Cystatin-B		0.60942	-0.343232	3	3	3	42.9	42.9	42.9	11.045	0	20.655	205060000	76	23.585	23.9886	NaN	23.4634	24.2638	24.2201	23.6083	24.0403	24.8022	24.1713
Q62433	NDRG1_MOUSE	Ndrg1	Protein NDRG1		0.208386	-0.146784	10	10	10	42.1	42.1	42.1	43.008	0	323.31	1438400000	303	25.2207	24.6968	24.7129	24.3401	25.641	24.9607	24.9927	24.5807	25.6154	25.1958
Q62465	VAT1_MOUSE	Vat1	Synaptic vesicle membrane protein VAT-1 homolog		0	NaN	2	2	2	5.2	5.2	5.2	43.096	0.0041436	4.504	1001500	6	NaN	NaN	NaN	NaN	NaN	NaN	NaN	NaN	NaN	NaN
Q62556	BT1A1_MOUSE	Btn1a1	Butyrophilin subfamily 1 member A1		0.278882	0.218222	5	5	5	11.5	11.5	11.5	58.406	0	255.73	276570000	95	24.4801	24.8435	24.0736	23.4624	23.2134	23.5375	23.9512	24.1502	23.488	23.855
Q64010	CRK_MOUSE	Crk	Adapter molecule crk		0	NaN	5	5	5	25.7	25.7	25.7	33.814	0.0022727	19.757	28023000	26	NaN	NaN	NaN	NaN	NaN	21.7104	NaN	NaN	22.7003	NaN
G3UXX3	G3UXX3_MOUSE	Spr	Sepiapterin reductase		0	-0.808978	4	4	4	22.4	22.4	22.4	23.357	0.0017544	8.4204	12523000	13	20.0966	NaN	NaN	NaN	20.1563	NaN	NaN	NaN	20.9355	NaN
A0A087WNS9	A0A087WNS9_MOUSE	Ly6e	Lymphocyte antigen 6E (Fragment)		0	NaN	1	1	1	22.2	22.2	22.2	6.9541	0	38.255	2783300	4	NaN	NaN	NaN	NaN	NaN	NaN	NaN	NaN	NaN	NaN
Q64285	CEL_MOUSE	Cel	Bile salt-activated lipase		0.317193	0.285279	27	27	27	53.1	53.1	53.1	65.812	0	323.31	13951000000	1801	27.1592	27.8781	28.5325	28.6452	27.5376	27.7261	28.3192	28.14	27.0328	27.1081
Q64433	CH10_MOUSE	Hspe1	10 kDa heat shock protein, mitochondrial		0.0338443	0.0344047	4	4	4	40.2	40.2	40.2	10.963	0	53.637	234890000	88	24.0459	22.8079	NaN	22.9204	23.5124	23.4598	23.2751	22.6339	23.9645	23.103
Q64442	DHSO_MOUSE	Sord	Sorbitol dehydrogenase		0	NaN	4	4	4	16	16	16	38.249	0	32.969	48259000	16	NaN	NaN	NaN	NaN	NaN	NaN	NaN	NaN	NaN	NaN
Q05DJ9	Q05DJ9_MOUSE	Tpp2	Tpp2 protein		0	NaN	2	2	2	4.6	4.6	4.6	65.553	0.0097442	3.3757	0	2	NaN	NaN	NaN	NaN	NaN	NaN	NaN	NaN	NaN	NaN
B1ASZ3	B1ASZ3_MOUSE	Gk	Glycerol kinase		0.827224	-0.499694	16	16	16	40.9	40.9	40.9	59.832	0	323.31	533240000	225	23.3831	23.0641	22.7927	22.1988	23.383	23.4663	22.9876	23.1652	24.2785	23.4227
Q64674	SPEE_MOUSE	Srm	Spermidine synthase		0.197616	-0.133781	14	14	14	62.6	62.6	62.6	33.995	0	323.31	1129000000	278	26.4255	25.6387	25.5409	25.4128	26.0875	26.0444	25.6783	25.3949	26.5201	26.1368
Q64685	SIAT1_MOUSE	St6gal1	Beta-galactoside alpha-2,6-sialyltransferase 1		0.150713	0.15368	4	4	4	15.4	15.4	15.4	46.585	0	74.338	50113000	22	21.8129	21.5483	21.7301	22.1215	20.9552	NaN	21.0825	NaN	21.8773	NaN
Q64726	ZA2G_MOUSE	Azgp1	Zinc-alpha-2-glycoprotein		0.044891	0.0392075	10	10	10	39.1	39.1	39.1	35.332	0	269.57	489720000	180	23.062	23.8175	24.0046	23.7546	22.8142	23.2637	23.6292	24.0587	22.8371	23.4682
Q64727	VINC_MOUSE	Vcl	Vinculin		1.25094	-0.430818	6	6	6	5.8	5.8	5.8	116.72	0	23.944	17082000	15	19.6726	NaN	NaN	NaN	19.5169	20.0984	NaN	NaN	19.9528	NaN
Q64737	PUR2_MOUSE	Gart	Trifunctional purine biosynthetic protein adenosine-3		0	NaN	1	1	1	1.6	1.6	1.6	107.5	0.0077922	3.8335	4917900	5	NaN	NaN	NaN	NaN	NaN	NaN	NaN	NaN	NaN	NaN
Q5SXR6	Q5SXR6_MOUSE	Cltc	Clathrin heavy chain		0.152862	-0.234655	22	22	22	16.8	16.8	16.8	191.98	0	54.882	120530000	68	22.7039	21.6314	NaN	NaN	21.8603	21.4802	NaN	NaN	23.1136	22.3058
F8WGT1	F8WGT1_MOUSE	Ahcyl2	Putative adenosylhomocysteinase 3		0	NaN	2	2	2	5.2	5.2	5.2	66.771	0.0016287	6.8054	11425000	5	NaN	NaN	NaN	NaN	NaN	NaN	NaN	NaN	NaN	NaN
Q6JHY2	SMGC_MOUSE	Muc19	Submandibular gland protein C		0	NaN	9	9	9	34.8	34.8	34.8	74.382	0	108.74	49999000	19	NaN	NaN	NaN	NaN	NaN	NaN	21.5093	NaN	23.5739	22.1529
E9PVC6	E9PVC6_MOUSE	Eif4g1	Eukaryotic translation initiation factor 4 gamma 1		0	NaN	6	6	6	5.5	5.5	5.5	171.28	0.0020284	13.108	22573000	11	20.0992	NaN	NaN	NaN	20.9915	NaN	NaN	NaN	NaN	NaN
A0A0N4SW98	A0A0N4SW98_MOUSE	Tsen2	tRNA-splicing endonuclease subunit Sen2		0	NaN	1	1	1	12.6	12.6	12.6	11.797	0.0099133	3.459	178340000	17	NaN	NaN	NaN	NaN	NaN	NaN	NaN	NaN	NaN	NaN
Q6P9R2	OXSR1_MOUSE	Oxsr1	Serine/threonine-protein kinase OSR1		0	NaN	2	2	2	5.5	5.5	5.5	58.213	0.0029718	5.1868	2532100	3	NaN	NaN	NaN	NaN	NaN	NaN	NaN	NaN	NaN	NaN
Q6PGB6	NAA50_MOUSE	Naa50	N-alpha-acetyltransferase 50		0	NaN	3	3	3	20.1	20.1	20.1	19.414	0.0029985	5.2938	9042900	5	NaN	NaN	NaN	NaN	NaN	NaN	NaN	NaN	NaN	NaN
Q6PGH2	JUPI2_MOUSE	Jpt2	Jupiter microtubule associated homolog 2		0	NaN	2	2	2	14.7	14.7	14.7	20.02	0.0098888	3.4354	7284100	4	NaN	NaN	NaN	NaN	NaN	NaN	NaN	NaN	NaN	NaN
Q6PHU5	SORT_MOUSE	Sort1	Sortilin		0	NaN	2	2	2	3	3	3	91.199	0.0042674	4.8082	43342000	21	NaN	22.9992	NaN	22.6406	22.4919	NaN	NaN	NaN	NaN	NaN
Q6S5C2	GNPTG_MOUSE	Gnptg	N-acetylglucosamine-1-phosphotransferase subunit gamma		0	1.27458	2	2	2	8.5	8.5	8.5	34.168	0.0017241	7.7311	29865000	24	22.6047	22.7973	NaN	NaN	NaN	NaN	NaN	NaN	21.4264	NaN
Q6ZQ38	CAND1_MOUSE	Cand1	Cullin-associated NEDD8-dissociated protein 1		0	NaN	7	7	7	7.8	7.8	7.8	136.33	0.0022989	20.21	16130000	9	NaN	NaN	NaN	NaN	NaN	NaN	NaN	NaN	NaN	NaN
Q6ZWX6	IF2A_MOUSE	Eif2s1	Eukaryotic translation initiation factor 2 subunit 1		0	NaN	2	2	2	6.3	6.3	6.3	36.108	0.0098765	3.4353	683010	2	NaN	NaN	NaN	NaN	NaN	NaN	NaN	NaN	NaN	NaN
Q6ZWY8	TYB10_MOUSE	Tmsb10	Thymosin beta-10		0	NaN	1	1	1	31.8	31.8	31.8	5.0256	0	30.172	9908900	6	NaN	NaN	NaN	NaN	NaN	NaN	NaN	NaN	NaN	NaN
Q76MZ3	2AAA_MOUSE	Ppp2r1a	Serine/threonine-protein phosphatase 2A 65 kDa regulatory subunit A alpha isoform		0.200161	-0.256113	4	4	4	11	11	11	65.322	0.002	12.234	86190000	27	22.324	21.3273	NaN	21.1385	22.7451	21.8868	NaN	NaN	22.6209	21.9117
Q78ZA7	NP1L4_MOUSE	Nap1l4	Nucleosome assembly protein 1-like 4		0	NaN	6	6	6	18.1	18.1	18.1	42.679	0.0019268	11.144	10110000	11	NaN	NaN	NaN	NaN	NaN	NaN	NaN	NaN	NaN	NaN
Q7TMD7	DSG4_MOUSE	Dsg4	Desmoglein-4		0	NaN	1	1	1	1.2	1.2	1.2	114.45	0.001675	7.239	10186000000	212	NaN	NaN	NaN	NaN	NaN	NaN	NaN	NaN	NaN	NaN
G3UZ48	G3UZ48_MOUSE	Syncrip	Heterogeneous nuclear ribonucleoprotein Q		0	NaN	3	3	3	8.8	8.8	8.8	52.062	0.0030349	5.4692	5932400	4	NaN	NaN	NaN	NaN	NaN	NaN	NaN	NaN	NaN	NaN
Q7TQI3	OTUB1_MOUSE	Otub1	Ubiquitin thioesterase OTUB1		0.336532	-0.399362	3	3	3	17.7	17.7	17.7	31.27	0	21.447	54758000	22	22.8098	NaN	21.7845	NaN	21.6944	22.6346	NaN	NaN	22.3566	NaN
Q7TSG5	SH321_MOUSE	Sh3d21	SH3 domain-containing protein 21		0.401802	-0.298352	2	2	2	3.5	3.5	3.5	60.323	0	47.951	29355000000	601	28.1392	28.7489	29.1067	29.8549	29.4042	29.2512	28.7982	29.6007	29.3662	29.7294
Q7TSV4	PGM2_MOUSE	Pgm2	Phosphoglucomutase-2		0	-0.518642	5	5	5	8.2	8.2	8.2	68.747	0.0018868	10.459	40365000	14	NaN	NaN	NaN	NaN	21.2753	NaN	NaN	NaN	21.794	NaN
A0A494BAH3	A0A494BAH3_MOUSE	Sh3tc2	SH3 domain and tetratricopeptide repeat-containing protein 2 (Fragment)		0	NaN	2	2	2	3	3	3	111.82	0.0099875	3.499	283740000	7	NaN	NaN	NaN	NaN	NaN	27.4122	27.7038	NaN	NaN	NaN
G3X8R2	G3X8R2_MOUSE	Sra1	Steroid receptor RNA activator 1 (Fragment)		0	NaN	1	1	1	8.1	8.1	8.1	24.496	0.0087719	3.5269	9177000	5	NaN	NaN	NaN	NaN	NaN	NaN	NaN	NaN	NaN	NaN
Q80YC5	FA12_MOUSE	F12	Coagulation factor XII		0.509084	-0.302359	7	7	7	14.6	14.6	14.6	65.701	0	60.51	291480000	141	23.5157	24.1097	24.3636	24.242	23.6446	23.9822	24.4146	25.0078	23.6827	24.3001
E9QN14	E9QN14_MOUSE	Srgap3	SLIT-ROBO Rho GTPase-activating protein 3		0.323348	-0.651663	1	1	1	2	2	2	121.72	0.008872	3.613	25477000000	80	30.2618	29.7655	30.5986	30.9405	27.4421	29.973	30.9847	30.4023	NaN	NaN
Q8BFR2	FSTL5_MOUSE	Fstl5	Follistatin-related protein 5		0	NaN	2	2	2	2.7	2.7	2.7	95.815	0.00978	3.3821	816730000	4	NaN	NaN	NaN	NaN	NaN	NaN	NaN	NaN	NaN	NaN
Q8BFR4	GNS_MOUSE	Gns	N-acetylglucosamine-6-sulfatase		0	NaN	3	3	3	6.4	6.4	6.4	61.174	0.0043103	4.9254	31200000	4	NaN	NaN	NaN	NaN	NaN	NaN	NaN	NaN	NaN	NaN
Q8BFR5	EFTU_MOUSE	Tufm	Elongation factor Tu, mitochondrial		0	-0.271171	6	6	6	19.2	19.2	19.2	49.508	0	20.512	17424000	11	21.6591	NaN	NaN	NaN	20.8782	NaN	NaN	NaN	21.5398	NaN
D3Z7F7	D3Z7F7_MOUSE	Cpped1	Serine/threonine-protein phosphatase CPPED1 (Fragment)		0	-0.324281	2	2	2	9.2	9.2	9.2	27.215	0.001634	6.8997	33728000	16	21.0952	NaN	NaN	20.1144	20.85	21.0108	NaN	NaN	NaN	NaN
Q8BGQ7	SYAC_MOUSE	Aars1	Alanine--tRNA ligase, cytoplasmic		0.0069793	-0.00819817	10	10	10	13.8	13.8	13.8	106.91	0	53.073	73691000	58	20.8896	20.5293	20.0422	20.1116	21.2303	20.7087	19.8484	19.979	21.6849	20.6229
Q8BH35	CO8B_MOUSE	C8b	Complement component C8 beta chain		0	NaN	2	2	2	5.6	5.6	5.6	66.229	0.0041096	4.4407	8458400	11	NaN	NaN	NaN	NaN	NaN	NaN	NaN	NaN	NaN	NaN
Q8BH95	ECHM_MOUSE	Echs1	Enoyl-CoA hydratase, mitochondrial		0	-0.0848141	3	3	3	10.3	10.3	10.3	31.474	0.0016155	6.6006	16997000	9	22.1387	NaN	NaN	NaN	NaN	NaN	NaN	NaN	22.2235	NaN
Q8BHN3	GANAB_MOUSE	Ganab	Neutral alpha-glucosidase AB		0	NaN	3	3	3	2.9	2.9	2.9	106.91	0.0015748	6.218	12563000	7	NaN	NaN	NaN	NaN	NaN	NaN	NaN	NaN	NaN	NaN
A0A0R4J2D3	A0A0R4J2D3_MOUSE	Mia3	Transport and Golgi organization protein 1 homolog (Fragment)		0	NaN	2	2	2	3.7	3.7	3.7	111.3	0.0016	6.437	3561900	4	NaN	NaN	NaN	NaN	NaN	NaN	NaN	NaN	NaN	NaN
Q8BJU0	SGTA_MOUSE	Sgta	Small glutamine-rich tetratricopeptide repeat-containing protein alpha		0	NaN	3	3	3	12.7	12.7	12.7	34.322	0.0042493	4.7627	3806600	4	NaN	NaN	NaN	NaN	NaN	NaN	NaN	NaN	NaN	NaN
Q8BJY1	PSMD5_MOUSE	Psmd5	26S proteasome non-ATPase regulatory subunit 5		0	NaN	3	3	3	6.2	6.2	6.2	55.971	0.0019048	10.754	19364000	10	NaN	NaN	NaN	NaN	NaN	NaN	NaN	NaN	NaN	NaN
Q8BK64	AHSA1_MOUSE	Ahsa1	Activator of 90 kDa heat shock protein ATPase homolog 1		0	NaN	2	2	2	11.5	11.5	11.5	38.117	0.0020534	13.561	7924800	3	NaN	NaN	NaN	NaN	NaN	NaN	NaN	NaN	NaN	NaN
Q8BKC5	IPO5_MOUSE	Ipo5	Importin-5		0.0318043	-0.0207717	8	8	8	10.8	10.8	10.8	123.59	0.0022936	20.061	39580000	21	22.0551	NaN	NaN	21.8782	22.0799	21.6324	NaN	NaN	22.3545	22.0886
Q8BM75	ARI5B_MOUSE	Arid5b	AT-rich interactive domain-containing protein 5B		0	NaN	1	1	1	1.1	1.1	1.1	131.84	0.0078947	3.9512	16191000	18	NaN	NaN	NaN	NaN	NaN	NaN	NaN	NaN	NaN	NaN
D3Z158	D3Z158_MOUSE	Qars	Glutaminyl-tRNA synthetase		0.212678	0.138026	8	8	8	14.6	14.6	14.6	85.054	0.0022624	19.366	49969000	31	21.6723	NaN	NaN	NaN	21.9419	21.6736	21.5964	NaN	22.0868	21.3196
Q8BND5	QSOX1_MOUSE	Qsox1	Sulfhydryl oxidase 1		0.094652	-0.0404812	52	52	52	58.3	58.3	58.3	82.784	0	323.31	117440000000	7124	30.4478	30.5925	30.583	30.2142	29.9331	30.182	30.5421	30.5806	30.1403	30.528
A0A498WGK2	A0A498WGK2_MOUSE	Nars	Asparagine--tRNA ligase		0.0466922	-0.0717651	13	13	13	25.3	25.3	25.3	64.208	0	276.98	169110000	70	22.8481	21.9517	NaN	NaN	23.094	22.5199	21.7959	NaN	23.6068	22.8896
Q8BTZ7	GMPPB_MOUSE	Gmppb	Mannose-1-phosphate guanyltransferase beta		0.748689	-0.416522	6	6	6	23.3	23.3	23.3	39.916	0	32.915	67347000	45	NaN	22.0497	21.7785	21.1954	22.0418	21.8616	21.9764	NaN	22.7008	22.1927
Q8BUV3	GEPH_MOUSE	Gphn	Gephyrin		0	NaN	2	2	2	4.7	4.7	4.7	83.281	0.0041667	4.5449	1766200	2	NaN	NaN	NaN	NaN	NaN	NaN	NaN	NaN	NaN	NaN
D3YWR7	D3YWR7_MOUSE	Qdpr	Dihydropteridine reductase		1.43857	-0.370104	6	6	6	52.9	52.9	52.9	20.008	0	58.76	66376000	44	21.5386	NaN	NaN	NaN	21.7103	21.8744	NaN	NaN	22.0807	22.0286
Q8BVQ5	PPME1_MOUSE	Ppme1	Protein phosphatase methylesterase 1		0	-0.388043	3	3	3	11.4	11.4	11.4	42.256	0.0018282	9.3882	24117000	24	NaN	NaN	NaN	NaN	21.4175	NaN	NaN	NaN	22.013	21.5981
Q8BWT1	THIM_MOUSE	Acaa2	3-ketoacyl-CoA thiolase, mitochondrial		0	NaN	2	2	2	6	6	6	41.829	0.0040486	4.1905	8116100	4	NaN	NaN	NaN	NaN	NaN	NaN	NaN	NaN	NaN	NaN
A0A0R4IZY0	A0A0R4IZY0_MOUSE	Thop1	Thimet oligopeptidase		0	NaN	3	3	3	7	7	7	78.026	0.0015924	6.4031	1469400	3	NaN	NaN	NaN	NaN	NaN	NaN	NaN	NaN	NaN	NaN
Q8C6Z1	MUC15_MOUSE	Muc15	Mucin-15		0	NaN	2	2	2	3.6	3.6	3.6	36.382	0.0041152	4.442	73926000	8	NaN	22.0145	22.6639	22.555	NaN	NaN	NaN	NaN	NaN	NaN
Q8CAY6	THIC_MOUSE	Acat2	Acetyl-CoA acetyltransferase, cytosolic		0.10091	-0.0953125	8	8	8	40.6	40.6	40.6	41.297	0	170.11	384980000	209	24.0968	23.0794	23.4013	23.3184	24.517	23.8251	23.5163	23.162	24.5259	23.8599
Q8CCH2	NHLC3_MOUSE	Nhlrc3	NHL repeat-containing protein 3		0	NaN	2	2	2	7.5	7.5	7.5	38.195	0.009901	3.4453	11020000	4	NaN	NaN	NaN	NaN	NaN	NaN	NaN	NaN	NaN	NaN
G3UX74	G3UX74_MOUSE	Pabpn1	Polyadenylate-binding protein 2		0	NaN	1	1	1	21.9	21.9	21.9	6.5159	0	24.328	0	1	NaN	NaN	NaN	NaN	NaN	NaN	NaN	NaN	NaN	NaN
Q8CDN6	TXNL1_MOUSE	Txnl1	Thioredoxin-like protein 1		0	-0.237103	6	6	6	28	28	28	32.237	0.0022075	17.491	47781000	25	22.3105	22.0818	NaN	NaN	22.7567	NaN	NaN	NaN	22.6201	NaN
Q8CFT2	SET1B_MOUSE	Setd1b	Histone-lysine N-methyltransferase SETD1B		0	NaN	1	1	1	0.7	0.7	0.7	215.35	0.0042017	4.6967	81195000	6	NaN	NaN	NaN	NaN	NaN	NaN	NaN	NaN	NaN	NaN
Q8CFV9	RIFK_MOUSE	Rfk	Riboflavin kinase		0	NaN	3	3	3	18.1	18.1	18.1	17.437	0.0029586	5.1394	25375000	5	NaN	NaN	NaN	NaN	NaN	NaN	NaN	NaN	NaN	NaN
Q8CG14	CS1A_MOUSE	C1sa	Complement C1s-A subcomponent		0	NaN	2	2	2	3.1	3.1	3.1	76.857	0.0042373	4.7383	4323300	5	NaN	NaN	NaN	NaN	NaN	NaN	NaN	NaN	NaN	NaN
Q8CG76	ARK72_MOUSE	Akr7a2	Aflatoxin B1 aldehyde reductase member 2		0	NaN	3	3	3	14.2	14.2	14.2	40.612	0.0017452	8.1669	9549200	8	NaN	NaN	NaN	NaN	NaN	NaN	NaN	NaN	NaN	NaN
Q8CGC7	SYEP_MOUSE	Eprs1	Bifunctional glutamate/proline--tRNA ligase		0	NaN	3	3	3	2.1	2.1	2.1	170.08	0.0042135	4.7155	4656800	3	NaN	NaN	NaN	NaN	NaN	NaN	NaN	NaN	NaN	NaN
Q8CHP8	PGP_MOUSE	Pgp	Glycerol-3-phosphate phosphatase		0.334639	-0.226147	8	8	8	31.2	31.2	31.2	34.54	0	323.31	474430000	164	24.2373	23.8892	23.6726	23.2456	24.2962	24.4102	23.5368	23.6147	24.6465	24.2635
Q8CI94	PYGB_MOUSE	Pygb	Glycogen phosphorylase, brain form		0.191922	0.371861	15	15	14	22.2	22.2	20.8	96.729	0	55.566	105820000	54	22.4178	NaN	NaN	NaN	22.7123	22.1216	21.0936	21.4566	23.6171	22.677
Q8CIF4	BTD_MOUSE	Btd	Biotinidase		0	NaN	4	4	4	11.7	11.7	11.7	58.154	0.0018182	9.2242	10032000	12	NaN	NaN	NaN	NaN	NaN	NaN	21.8867	NaN	NaN	21.4221
Q8CIN4	PAK2_MOUSE	Pak2	Serine/threonine-protein kinase PAK 2		0	-0.202606	4	4	4	12	12	12	57.93	0.0018519	9.7852	9367300	6	NaN	NaN	NaN	NaN	21.156	NaN	NaN	NaN	21.3586	NaN
Q8JZN5	ACAD9_MOUSE	Acad9	Complex I assembly factor ACAD9, mitochondrial		0	NaN	8	8	8	15	15	15	68.721	0.0022779	19.818	30922000	12	NaN	NaN	NaN	NaN	NaN	NaN	NaN	NaN	NaN	NaN
Q8K010	OPLA_MOUSE	Oplah	5-oxoprolinase		0	NaN	3	3	3	2.8	2.8	2.8	137.61	0.0029412	5.1187	6585600	6	NaN	NaN	NaN	NaN	NaN	NaN	NaN	NaN	NaN	NaN
Q8K0C9	GMDS_MOUSE	Gmds	GDP-mannose 4,6 dehydratase		0.539491	-0.362309	4	4	4	14.5	14.5	14.5	41.984	0.0019881	11.937	52375000	19	21.5729	NaN	NaN	NaN	21.5901	21.6908	NaN	NaN	22.1969	NaN
Q8K0E8	FIBB_MOUSE	Fgb	Fibrinogen beta chain		0.0245757	0.0672983	15	15	14	38.7	38.7	36.6	54.752	0	323.31	591250000	137	23.9146	25.2538	25.9725	25.8823	24.3671	25.4246	26.1715	26.1829	NaN	22.2641
Q8K157	GALM_MOUSE	Galm	Galactose mutarotase		0	NaN	2	2	2	10.5	10.5	10.5	37.798	0.0099751	3.4914	2470200	2	NaN	NaN	NaN	NaN	NaN	NaN	NaN	NaN	NaN	NaN
Q8K183	PDXK_MOUSE	Pdxk	Pyridoxal kinase		0.147201	0.0916954	10	10	10	41.7	41.7	41.7	35.015	0	323.31	1385900000	307	26.1808	25.7165	25.7378	25.447	26.4599	25.9981	25.7505	25.5209	26.3284	25.4856
Q8K1M6	DNM1L_MOUSE	Dnm1l	Dynamin-1-like protein		0	NaN	2	2	2	3	3	3	82.657	0.0040984	4.417	2212500	2	NaN	NaN	NaN	NaN	NaN	NaN	NaN	NaN	NaN	NaN
Q8K2C7	OS9_MOUSE	Os9	Protein OS-9		0	NaN	2	2	2	4.6	4.6	4.6	76.107	0.0053333	4.0895	7002000	10	NaN	NaN	NaN	NaN	NaN	NaN	NaN	NaN	NaN	NaN
Q8K2Q9	SHOT1_MOUSE	Shtn1	Shootin-1		0	NaN	4	4	4	7.6	7.6	7.6	71.342	0.0018587	10.094	11609000	8	NaN	NaN	NaN	NaN	NaN	NaN	NaN	NaN	NaN	NaN
D3YYK0	D3YYK0_MOUSE	Abhd11	Protein ABHD11		0	NaN	2	2	2	11.5	11.5	11.5	24.881	0.0029326	5.1136	41318000	11	21.8988	20.2323	NaN	NaN	21.7543	NaN	NaN	NaN	NaN	NaN
Q8K5B2	MCFD2_MOUSE	Mcfd2	Multiple coagulation factor deficiency protein 2 homolog		0	NaN	3	3	3	35.9	35.9	35.9	16.168	0.0017483	8.1908	13322000	10	NaN	NaN	NaN	NaN	NaN	NaN	NaN	NaN	NaN	NaN
A0A2R8VHV7	A0A2R8VHV7_MOUSE	Gpt	Alanine aminotransferase 1 (Fragment)		0	NaN	2	2	2	11.6	11.6	11.6	25.828	0.0089629	3.675	3016200	4	NaN	NaN	NaN	NaN	NaN	NaN	NaN	NaN	NaN	NaN
Q8QZS1	HIBCH_MOUSE	Hibch	3-hydroxyisobutyryl-CoA hydrolase, mitochondrial		0.393368	-0.369957	4	4	4	14.8	14.8	14.8	43.037	0.0022472	18.808	55539000	20	21.3935	20.2716	NaN	NaN	20.626	20.8062	NaN	NaN	21.5498	21.0449
Q8QZT1	THIL_MOUSE	Acat1	Acetyl-CoA acetyltransferase, mitochondrial		0.368655	0.851413	7	7	7	23.6	23.6	23.6	44.816	0	179.76	48941000	24	22.7257	NaN	NaN	NaN	21.7629	NaN	20.6765	NaN	22.1093	NaN
Q8R050	ERF3A_MOUSE	Gspt1	Eukaryotic peptide chain release factor GTP-binding subunit ERF3A		0.450161	0.515602	5	5	5	9.9	9.9	9.9	68.625	0.0021598	16.353	30230000	18	22.594	NaN	NaN	NaN	22.3683	22.3821	NaN	NaN	21.549	NaN
Q8R059	GALE_MOUSE	Gale	UDP-glucose 4-epimerase		0.244801	-0.254557	9	9	9	39.8	39.8	39.8	38.224	0	323.31	412270000	106	24.2936	23.4846	22.8251	22.8998	24.4296	24.1116	23.4187	23.106	24.6153	23.9538
Q8R0Y6	AL1L1_MOUSE	Aldh1l1	Cytosolic 10-formyltetrahydrofolate dehydrogenase		0	NaN	7	7	7	10.3	10.3	10.3	98.708	0.0021322	15.966	28682000	19	NaN	NaN	NaN	NaN	NaN	NaN	NaN	NaN	NaN	NaN
Q8R121	ZPI_MOUSE	Serpina10	Protein Z-dependent protease inhibitor		0.0362349	-0.0893803	5	5	5	12.9	12.9	12.9	51.797	0.0019608	11.749	32411000	26	20.4147	NaN	21.1531	NaN	NaN	NaN	NaN	21.5683	20.1783	NaN
Q8R197	SAST_MOUSE	Olah	S-acyl fatty acid synthase thioesterase, medium chain		0.803566	-0.607053	14	14	14	56.2	56.2	56.2	30.25	0	323.31	2976600000	644	26.1079	25.285	25.1291	24.7926	26.4455	26.2795	25.5795	25.7009	26.8526	26.3829
Q8R317	UBQL1_MOUSE	Ubqln1	Ubiquilin-1		0.312018	-0.225774	3	3	3	8.1	8.1	8.1	61.976	0.0017123	7.6448	27877000	19	21.0518	20.7093	NaN	NaN	21.2027	20.9251	NaN	NaN	NaN	21.5023
E0CYD4	E0CYD4_MOUSE	Gtf2a1l	TFIIA-alpha and beta-like factor (Fragment)		0	NaN	1	1	1	11.6	11.6	11.6	26.715	0.0099379	3.4705	1775900	1	NaN	NaN	NaN	NaN	NaN	NaN	NaN	NaN	NaN	NaN
Q8VBT6	APOBR_MOUSE	Apobr	Apolipoprotein B receptor		0	NaN	2	2	2	3.5	3.5	3.5	102.7	0.0018484	9.7769	2967700	3	NaN	NaN	NaN	NaN	NaN	NaN	NaN	NaN	NaN	NaN
Q8VCM7	FIBG_MOUSE	Fgg	Fibrinogen gamma chain		0.31127	-0.655812	11	11	11	33.9	33.9	33.9	49.391	0	323.31	463200000	134	21.4329	23.9267	24.3339	24.223	22.9129	24.2883	24.9502	24.9949	NaN	21.8533
Q8VCS0	PGRP2_MOUSE	Pglyrp2	N-acetylmuramoyl-L-alanine amidase		0	NaN	4	4	4	7.5	7.5	7.5	57.706	0.0018149	9.1873	29727000	27	NaN	NaN	NaN	NaN	NaN	NaN	NaN	NaN	NaN	NaN
Q8VCT3	AMPB_MOUSE	Rnpep	Aminopeptidase B		0	NaN	4	4	4	9.8	9.8	9.8	72.415	0.0020877	14.429	9876600	8	NaN	NaN	NaN	NaN	NaN	NaN	NaN	NaN	NaN	NaN
Q8VDD5	MYH9_MOUSE	Myh9	Myosin-9		0	NaN	2	2	2	1.4	1.4	1.4	226.37	0.009768	3.3796	875850	2	NaN	NaN	NaN	NaN	NaN	NaN	NaN	NaN	NaN	NaN
Q8VE47	UBA5_MOUSE	Uba5	Ubiquitin-like modifier-activating enzyme 5		0.213581	0.147717	5	5	5	23.3	23.3	23.3	44.789	0	29.188	50454000	43	22.7262	NaN	NaN	NaN	22.7103	22.2276	NaN	NaN	22.9284	22.5556
Q8VEN2	PLET1_MOUSE	Plet1	Placenta-expressed transcript 1 protein		0.478635	0.236211	2	2	2	7.6	7.6	7.6	25.006	0	323.31	254640000	54	23.3644	23.1361	23.1838	22.8596	22.5284	23.0732	22.6343	22.1742	22.853	23.1565
Q8VHE6	DYH5_MOUSE	Dnah5	Dynein heavy chain 5, axonemal		0	NaN	1	1	1	0.2	0.2	0.2	527.55	0.0041783	4.5966	0	1	NaN	NaN	NaN	NaN	NaN	NaN	NaN	NaN	NaN	NaN
E0CYY1	E0CYY1_MOUSE	Ciapin1	Anamorsin (Fragment)		0	NaN	1	1	1	15.1	15.1	15.1	16.706	0.002886	4.9709	2150100	1	NaN	NaN	NaN	NaN	NaN	NaN	NaN	NaN	NaN	NaN
Q91UZ5	IMPA2_MOUSE	Impa2	Inositol monophosphatase 2		0	NaN	2	2	2	7.9	7.9	7.9	31.716	0.0015432	5.7377	21695000	15	NaN	NaN	NaN	NaN	NaN	21.1132	NaN	NaN	NaN	21.023
Q50HX3	Q50HX3_MOUSE	Rab14	RAB14 protein variant		0	NaN	1	1	1	7.1	7.1	7.1	21.888	0.009009	3.7266	1298000	1	NaN	NaN	NaN	NaN	NaN	NaN	NaN	NaN	NaN	NaN
Q91V64	ISOC1_MOUSE	Isoc1	Isochorismatase domain-containing protein 1		0.018898	0.0230834	5	5	5	23.6	23.6	23.6	32.032	0	24.041	55855000	28	22.008	NaN	NaN	NaN	22.0407	21.5567	NaN	NaN	22.5936	21.8535
A0A1L1SSF8	A0A1L1SSF8_MOUSE	4931406C07Rik	RIKEN cDNA 4931406C07 gene		0	NaN	3	3	3	19.1	19.1	19.1	31.334	0.0015848	6.3352	4061400	4	NaN	NaN	NaN	NaN	NaN	NaN	NaN	NaN	NaN	NaN
Q91VH6	MEMO1_MOUSE	Memo1	Protein MEMO1		0	NaN	2	2	2	9.1	9.1	9.1	33.692	0.007732	3.7603	870930	3	NaN	NaN	NaN	NaN	NaN	NaN	NaN	NaN	NaN	NaN
A0A1B0GSG5	A0A1B0GSG5_MOUSE	Rnh1	Ribonuclease inhibitor		0	NaN	2	2	2	5.1	5.1	5.1	53.926	0.0030722	5.6872	15044000	10	NaN	NaN	NaN	NaN	NaN	NaN	NaN	NaN	NaN	NaN
A0A0R4J1Y7	A0A0R4J1Y7_MOUSE	Txndc5	Thioredoxin domain-containing protein 5		0	NaN	3	3	3	13.9	13.9	13.9	36.083	0.0021692	16.555	20036000	14	NaN	NaN	NaN	NaN	NaN	NaN	NaN	NaN	NaN	NaN
A2A7S7	A2A7S7_MOUSE	Yars	Tyrosine--tRNA ligase		0.0385373	-0.027146	8	8	8	15.2	15.2	15.2	63.001	0.0022321	18.511	62622000	30	21.2416	NaN	21.1938	NaN	21.8942	21.3723	NaN	NaN	21.6252	21.4136
Q91WT8	RBM47_MOUSE	Rbm47	RNA-binding protein 47		0	NaN	2	2	2	4.2	4.2	4.2	64.061	0.0099502	3.4754	1518200	2	NaN	NaN	NaN	NaN	NaN	NaN	NaN	NaN	NaN	NaN
A2AC16	A2AC16_MOUSE	Dcxr	L-xylulose reductase		1.70648	-0.875099	4	4	4	20.8	20.8	20.8	24.99	0.0022371	18.514	61792000	42	21.0589	20.704	20.35	20.2161	21.1935	21.3632	NaN	NaN	21.8689	21.5067
Q91X72	HEMO_MOUSE	Hpx	Hemopexin		0.209324	0.152729	27	27	21	58.9	58.9	51.5	51.317	0	323.31	22520000000	2372	27.4356	28.6403	28.2753	28.6007	27.847	28.1855	27.896	28.524	27.4097	28.02
Q91XA2	GOLM1_MOUSE	Golm1	Golgi membrane protein 1		0.0691384	0.0380812	4	4	4	13.5	13.5	13.5	44.326	0	40.512	65498000	23	22.1842	22.1359	NaN	22.2883	22.3499	NaN	NaN	22.4924	21.9106	NaN
Q91XF0	PNPO_MOUSE	Pnpo	Pyridoxine-5-phosphate oxidase		0	NaN	2	2	2	13.8	13.8	13.8	30.114	0.0018416	9.6219	6952100	2	NaN	NaN	NaN	NaN	NaN	NaN	NaN	NaN	NaN	NaN
Q91YI0	ARLY_MOUSE	Asl	Argininosuccinate lyase		0	-0.0973695	5	5	5	14.2	14.2	14.2	51.739	0	25.029	56583000	20	21.6436	21.5289	NaN	NaN	21.7385	21.7344	NaN	NaN	NaN	NaN
A0A0R4J085	A0A0R4J085_MOUSE	Uap1	UDP-N-acetylhexosamine pyrophosphorylase		0	NaN	3	2	2	7.3	4.8	4.8	58.495	0.0053476	4.1067	2928500	3	NaN	NaN	NaN	NaN	NaN	NaN	NaN	NaN	NaN	NaN
Q91YP2	NEUL_MOUSE	Nln	Neurolysin, mitochondrial		0	NaN	3	3	3	6.2	6.2	6.2	80.428	0.0015649	6.0708	3611300	4	NaN	NaN	NaN	NaN	NaN	NaN	NaN	NaN	NaN	NaN
Q91YR1	TWF1_MOUSE	Twf1	Twinfilin-1		0	-0.27589	5	5	5	19.4	19.4	19.4	40.079	0	26.702	29945000	19	21.208	NaN	NaN	NaN	NaN	NaN	NaN	NaN	21.4839	NaN
Q91Z53	GRHPR_MOUSE	Grhpr	Glyoxylate reductase/hydroxypyruvate reductase		0.253114	-0.242546	6	6	6	24.4	24.4	24.4	35.328	0	23.263	118600000	51	23.1749	NaN	22.1548	22.1805	NaN	23.0097	22.0371	22.4705	23.3707	22.842
Q91Z83	MYH7_MOUSE	Myh7	Myosin-7		0	NaN	2	2	2	2	2	2	222.88	0.005284	4.0038	14298000	5	NaN	NaN	NaN	NaN	NaN	NaN	NaN	NaN	NaN	NaN
Q91ZJ5	UGPA_MOUSE	Ugp2	UTP--glucose-1-phosphate uridylyltransferase		0.103036	-0.0772353	6	6	6	15.2	15.2	15.2	56.979	0	157.1	209630000	70	22.6818	21.7078	21.5404	21.5253	22.2916	22.1945	21.8207	NaN	22.2291	21.8621
Q920A5	RISC_MOUSE	Scpep1	Retinoid-inducible serine carboxypeptidase		0	NaN	2	2	2	4.9	4.9	4.9	50.964	0.0040377	4.166	7173100	5	NaN	NaN	NaN	NaN	NaN	NaN	NaN	NaN	NaN	NaN
Q920E5	FPPS_MOUSE	Fdps	Farnesyl pyrophosphate synthase		0.0883029	-0.0954789	6	6	6	22.4	22.4	22.4	40.581	0	52.134	168990000	59	22.6936	22.8699	NaN	22.068	23.6187	22.8351	NaN	NaN	22.7581	23.1309
Q921I1	TRFE_MOUSE	Tf	Serotransferrin		1.32507	-0.416162	71	71	49	73.5	73.5	46.8	76.723	0	323.31	2378500000000	48830	33.0956	33.4735	33.696	33.3078	33.1287	33.6461	33.9681	34.0753	33.2866	33.8064
A0A2I3BQK1	A0A2I3BQK1_MOUSE	Cyrib	CYFIP-related Rac1 interactor B (Fragment)		0	NaN	1	1	1	17.1	17.1	17.1	8.6745	0.005305	4.0246	1216700	2	NaN	NaN	NaN	NaN	NaN	NaN	NaN	NaN	NaN	NaN
Q922B2	SYDC_MOUSE	Dars1	Aspartate--tRNA ligase, cytoplasmic		0	NaN	5	5	5	10.8	10.8	10.8	57.147	0.0017271	7.816	4123900	5	NaN	NaN	NaN	NaN	NaN	NaN	NaN	NaN	NaN	NaN
Q922D8	C1TC_MOUSE	Mthfd1	C-1-tetrahydrofolate synthase, cytoplasmic		0.370136	-0.611488	12	12	12	18.2	18.2	18.2	101.2	0	25.696	57288000	42	20.7057	20.7341	20.391	NaN	21.5905	21.2235	NaN	NaN	22.8921	20.2849
A2ABY3	A2ABY3_MOUSE	Pcyt2	Ethanolamine-phosphate cytidylyltransferase		0	NaN	2	2	2	7	7	7	43.446	0.0077519	3.7754	7500500	6	NaN	NaN	NaN	NaN	NaN	NaN	NaN	NaN	NaN	NaN
Q922F4	TBB6_MOUSE	Tubb6	Tubulin beta-6 chain		0	NaN	8	1	1	19.2	3.8	3.8	50.09	0	35.815	25813000	8	NaN	NaN	NaN	NaN	NaN	NaN	NaN	NaN	NaN	NaN
Q922H4	GMPPA_MOUSE	Gmppa	Mannose-1-phosphate guanyltransferase alpha		0	-0.347584	4	4	4	12.9	12.9	12.9	46.244	0.0018116	9.1803	20320000	17	21.4561	NaN	NaN	NaN	NaN	NaN	NaN	NaN	22.3189	21.2886
Q922R8	PDIA6_MOUSE	Pdia6	Protein disulfide-isomerase A6		0	NaN	5	5	5	17	17	17	48.1	0.0019157	10.919	9144200	16	NaN	NaN	NaN	NaN	NaN	NaN	NaN	NaN	NaN	NaN
H3BKQ5	H3BKQ5_MOUSE	Ggact	Gamma-glutamylaminecyclotransferase		0	NaN	2	2	2	33.8	33.8	33.8	7.5127	0	76.654	11904000	8	NaN	NaN	NaN	NaN	NaN	NaN	NaN	NaN	NaN	NaN
A0A0U1RPU7	A0A0U1RPU7_MOUSE	Blvrb	Flavin reductase (NADPH)		0.576107	-0.192455	4	4	4	40.5	40.5	40.5	12.868	0	68.272	67360000	26	22.4871	NaN	NaN	NaN	22.5053	22.771	NaN	NaN	22.8224	22.4727
Q924M7	MPI_MOUSE	Mpi	Mannose-6-phosphate isomerase		0.0744101	0.0658207	5	5	5	18.7	18.7	18.7	46.575	0	103.27	41971000	33	22.1586	21.281	NaN	NaN	21.9614	21.7861	NaN	NaN	21.9835	21.4341
Q93092	TALDO_MOUSE	Taldo1	Transaldolase		1.22463	-0.790507	11	11	11	30.6	30.6	30.6	37.387	0	38.172	310780000	99	22.4185	22.6425	22.3704	23.2568	22.6936	24.5908	23.2816	23.0355	23.7069	22.7195
Q99J77	SIAS_MOUSE	Nans	Sialic acid synthase		0.962539	-0.5211	9	9	9	37	37	37	40.024	0	323.31	1133100000	316	24.7386	23.9229	23.5636	23.6684	24.5934	24.9118	24.3545	24.177	25.0221	24.6269
Q99J83	ATG5_MOUSE	Atg5	Autophagy protein 5		0	NaN	2	2	2	13.1	13.1	13.1	32.402	0.0029542	5.1283	215420000	11	NaN	NaN	NaN	NaN	NaN	NaN	NaN	NaN	NaN	NaN
A0A338P748	A0A338P748_MOUSE	Klhl22	Kelch-like protein 22 (Fragment)		0	NaN	1	1	1	73	73	73	4.2426	0.0042735	4.8148	15097000	3	NaN	NaN	NaN	NaN	NaN	NaN	NaN	NaN	NaN	NaN
Q99JT9	MTND_MOUSE	Adi1	1,2-dihydroxy-3-keto-5-methylthiopentene dioxygenase		0	NaN	2	2	2	15.1	15.1	15.1	21.523	0.0040872	4.3343	9837900	2	NaN	NaN	NaN	NaN	NaN	NaN	NaN	NaN	NaN	NaN
A2ATI9	A2ATI9_MOUSE	Gorasp2	Golgi reassembly-stacking protein 2		0	NaN	1	1	1	3.7	3.7	3.7	45.026	0	23.558	12561000	8	NaN	NaN	NaN	NaN	NaN	NaN	NaN	NaN	NaN	NaN
Q99K01	PDXD1_MOUSE	Pdxdc1	Pyridoxal-dependent decarboxylase domain-containing protein 1		0	NaN	3	3	3	6.1	6.1	6.1	87.334	0.0015699	6.1961	5692200	4	NaN	NaN	NaN	NaN	NaN	NaN	NaN	NaN	NaN	NaN
Q99K30	ES8L2_MOUSE	Eps8l2	Epidermal growth factor receptor kinase substrate 8-like protein 2		0	NaN	2	2	2	2.9	2.9	2.9	82.228	0.0078329	3.879	28418000	3	NaN	NaN	NaN	NaN	NaN	NaN	NaN	NaN	NaN	NaN
Q99K85	SERC_MOUSE	Psat1	Phosphoserine aminotransferase		0	NaN	4	4	4	15.7	15.7	15.7	40.472	0.0021552	16.337	15431000	11	20.1626	NaN	20.09	NaN	21.1563	NaN	NaN	NaN	NaN	NaN
D3YWI0	D3YWI0_MOUSE	Hagh	Hydroxyacylglutathione hydrolase, mitochondrial (Fragment)		0	NaN	2	2	2	13.8	13.8	13.8	18.201	0.0040541	4.214	5059600	2	NaN	NaN	NaN	NaN	NaN	NaN	NaN	NaN	NaN	NaN
Q99KI0	ACON_MOUSE	Aco2	Aconitate hydratase, mitochondrial		0.370949	-0.384591	24	24	24	45.1	45.1	45.1	85.462	0	323.31	1126100000	347	24.3231	22.4218	22.7175	22.1226	23.7081	23.7878	23.3842	22.8906	23.9749	23.1785
Q99KK7	DPP3_MOUSE	Dpp3	Dipeptidyl peptidase 3		0.340449	-0.485664	11	11	11	23.6	23.6	23.6	82.897	0	124.67	94389000	52	21.4669	20.5052	NaN	NaN	22.3641	21.5516	NaN	NaN	22.3889	21.8528
Q99KQ4	NAMPT_MOUSE	Nampt	Nicotinamide phosphoribosyltransferase		0.0257094	-0.028698	11	11	11	30.5	30.5	30.5	55.446	0	268.67	391980000	136	23.2626	22.9443	22.1778	22.2314	22.888	23.0225	22.6281	21.6687	23.6503	22.6779
Q99KR3	LACB2_MOUSE	Lactb2	Endoribonuclease LACTB2		0.741147	-0.454912	2	2	2	9.4	9.4	9.4	32.754	0.0029499	5.1248	35008000	17	21.2317	21.0243	NaN	NaN	20.9843	21.2093	NaN	NaN	22.0729	21.3228
Q99L13	3HIDH_MOUSE	Hibadh	3-hydroxyisobutyrate dehydrogenase, mitochondrial		0	NaN	2	2	2	9	9	9	35.44	0.0042254	4.7366	8010000	4	NaN	NaN	NaN	NaN	NaN	NaN	NaN	NaN	NaN	NaN
F8WJK8	F8WJK8_MOUSE	St13	Hsc70-interacting protein		1.1641	-0.888489	5	5	5	17.1	17.1	17.1	40.538	0	41.756	105160000	31	22.0231	20.8198	NaN	21.5577	NaN	22.3883	NaN	NaN	22.4709	22.2069
Q99LC5	ETFA_MOUSE	Etfa	Electron transfer flavoprotein subunit alpha, mitochondrial		0.397706	0.333837	8	8	8	34.8	34.8	34.8	35.009	0	31.024	1445600000	103	26.081	24.3702	24.758	24.9421	25.7355	25.1434	25.0204	24.0896	25.1881	24.7761
Q99LN9	DOHH_MOUSE	Dohh	Deoxyhypusine hydroxylase		0	-0.0735092	4	4	4	18.9	18.9	18.9	32.905	0.0018018	9.0183	12573000	15	NaN	NaN	NaN	NaN	20.8085	20.882	NaN	NaN	NaN	NaN
A2A815	A2A815_MOUSE	Park7	Maillard deglycase (Fragment)		0.0266037	0.0245802	6	6	6	75.6	75.6	75.6	14.243	0	198.57	361710000	105	24.5787	23.8245	23.673	23.7948	24.3487	24.2353	NaN	23.2072	24.4964	24.1385
Q99NB1	ACS2L_MOUSE	Acss1	Acetyl-coenzyme A synthetase 2-like, mitochondrial		0.182716	-0.531168	13	13	13	29	29	29	74.622	0	128.34	206850000	79	24.3919	20.4319	19.9926	NaN	23.4316	22.5324	22.1305	NaN	23.5204	22.1893
Q99PT1	GDIR1_MOUSE	Arhgdia	Rho GDP-dissociation inhibitor 1		0.153908	0.108122	7	7	7	56.9	56.9	56.9	23.407	0	323.31	309150000	110	23.7296	22.919	23.157	22.9695	24.0496	23.4059	23.0524	22.794	23.702	23.3299
Q9CPT4	MYDGF_MOUSE	Mydgf	Myeloid-derived growth factor		0	NaN	2	2	2	12.7	12.7	12.7	17.982	0.0042796	4.8538	7692900	10	NaN	NaN	NaN	NaN	NaN	NaN	NaN	NaN	NaN	NaN
Q9CPU0	LGUL_MOUSE	Glo1	Lactoylglutathione lyase		0	NaN	4	4	4	34.2	34.2	34.2	20.809	0.0018553	9.9429	37935000	31	NaN	NaN	NaN	NaN	NaN	22.7309	22.1059	NaN	23.1586	22.6876
E9Q197	E9Q197_MOUSE	Glod4	Glyoxalase domain-containing protein 4		0	-0.191844	5	5	5	22.2	22.2	22.2	31.207	0	39.03	88690000	27	24.3563	23.0818	NaN	NaN	23.0917	NaN	NaN	NaN	23.7018	NaN
Q9CPX6	ATG3_MOUSE	Atg3	Ubiquitin-like-conjugating enzyme ATG3		0.0362916	-0.0455456	4	4	4	18.2	18.2	18.2	35.796	0	24.08	28008000	20	21.464	NaN	20.3579	NaN	21.0361	21.0329	NaN	NaN	20.9635	NaN
Q9CPY7	AMPL_MOUSE	Lap3	Cytosol aminopeptidase		0.0495626	-0.0655814	8	8	8	21.6	21.6	21.6	56.141	0.0022676	19.506	70247000	34	21.3319	21.7811	NaN	NaN	23.1702	22.0889	21.7053	21.9056	22.5324	22.5679
Q9CQ45	NENF_MOUSE	Nenf	Neudesin		0	NaN	4	4	4	31	31	31	18.904	0	28.206	4849000	6	NaN	NaN	NaN	NaN	NaN	NaN	NaN	NaN	NaN	NaN
Q9CQ60	6PGL_MOUSE	Pgls	6-phosphogluconolactonase		0.871275	-0.385959	9	9	9	58.8	58.8	58.8	27.254	0	97.657	418750000	136	23.4433	22.7449	22.8271	22.6968	23.4898	23.6605	23.2466	22.9859	23.8475	23.3914
Q9CQ65	MTAP_MOUSE	Mtap	S-methyl-5-thioadenosine phosphorylase		0	NaN	3	3	3	18.4	18.4	18.4	31.062	0.0016722	7.1854	8301800	7	NaN	NaN	NaN	NaN	NaN	NaN	NaN	NaN	NaN	NaN
Q9CQ86	MIEN1_MOUSE	Mien1	Migration and invasion enhancer 1		0	NaN	2	2	2	24.3	24.3	24.3	12.295	0.0028818	4.952	36042000	10	22.0436	22.0136	NaN	21.2246	NaN	NaN	NaN	NaN	NaN	NaN
Q9CQC9	SAR1B_MOUSE	Sar1b	GTP-binding protein SAR1b		0	-0.752413	2	2	2	11.1	11.1	11.1	22.382	0.0042433	4.7516	23104000	10	NaN	NaN	NaN	NaN	21.8426	22.595	NaN	NaN	NaN	NaN
A0A2I3BR94	A0A2I3BR94_MOUSE	Gmfb	Glia maturation factor beta (Fragment)		0	NaN	1	1	1	8	8	8	15.797	0.0087829	3.53	2116800	2	NaN	NaN	NaN	NaN	NaN	NaN	NaN	NaN	NaN	NaN
Q9CQM5	TXD17_MOUSE	Txndc17	Thioredoxin domain-containing protein 17		0	-0.811684	2	2	2	18.7	18.7	18.7	14.015	0.0022272	18.233	58849000	18	23.9517	NaN	23.0487	NaN	23.6209	NaN	NaN	NaN	24.3521	NaN
Q9CQM9	GLRX3_MOUSE	Glrx3	Glutaredoxin-3		0	NaN	5	5	5	25.2	25.2	25.2	37.778	0	22.947	50948000	22	21.6269	21.4866	NaN	NaN	22.2494	NaN	NaN	NaN	NaN	NaN
Q9CQT1	MTNA_MOUSE	Mri1	Methylthioribose-1-phosphate isomerase		0	-0.309551	2	2	2	8.4	8.4	8.4	39.41	0.0040816	4.3139	15286000	8	NaN	NaN	NaN	NaN	20.9211	NaN	NaN	NaN	21.2307	NaN
Q9CQV8	1433B_MOUSE	Ywhab	14-3-3 protein beta/alpha		0	NaN	4	2	2	22.8	15.4	15.4	28.086	0	101.9	4105000	4	NaN	NaN	NaN	NaN	NaN	NaN	NaN	NaN	NaN	NaN
Q9CQW1	YKT6_MOUSE	Ykt6	Synaptobrevin homolog YKT6		0	NaN	3	3	3	26.3	26.3	26.3	22.314	0	66.169	16945000	14	NaN	21.1788	NaN	NaN	21.3336	NaN	NaN	NaN	NaN	NaN
Q9CR09	UFC1_MOUSE	Ufc1	Ubiquitin-fold modifier-conjugating enzyme 1		0.499176	-0.493301	3	3	3	19.2	19.2	19.2	19.481	0.0016502	6.9959	103050000	31	NaN	23.5921	NaN	23.3059	24.3469	24.1157	NaN	NaN	24.3675	NaN
Q9CR16	PPID_MOUSE	Ppid	Peptidyl-prolyl cis-trans isomerase D		0	NaN	2	2	2	5.7	5.7	5.7	40.742	0.009697	3.3186	3602200	2	NaN	NaN	NaN	NaN	NaN	NaN	NaN	NaN	NaN	NaN
F6ZFT1	F6ZFT1_MOUSE	Ndufab1	Acyl carrier protein (Fragment)		0	NaN	1	1	1	11	11	11	14.309	0.0015949	6.4084	0	2	NaN	NaN	NaN	NaN	NaN	NaN	NaN	NaN	NaN	NaN
Q9CR51	VATG1_MOUSE	Atp6v1g1	V-type proton ATPase subunit G 1		0	NaN	1	1	1	9.3	9.3	9.3	13.724	0.008805	3.5774	7693300	6	NaN	NaN	NaN	NaN	NaN	NaN	NaN	NaN	NaN	NaN
Q9CRB3	HIUH_MOUSE	Urah	5-hydroxyisourate hydrolase		0	NaN	2	2	2	32.2	32.2	32.2	13.559	0	140.3	27344000	18	NaN	NaN	NaN	NaN	NaN	NaN	NaN	NaN	21.7098	21.1718
Q9CWJ9	PUR9_MOUSE	Atic	Bifunctional purine biosynthesis protein ATIC		0.038533	-0.0571476	20	20	20	44.8	44.8	44.8	64.217	0	93.035	242650000	129	23.0533	22.0447	21.5162	21.7477	22.9421	22.3776	21.3045	21.5045	23.5055	22.8976
Q9CWS0	DDAH1_MOUSE	Ddah1	N(G),N(G)-dimethylarginine dimethylaminohydrolase 1		0.198248	0.138432	7	7	7	30.9	30.9	30.9	31.381	0	107.8	465340000	92	24.3253	23.5793	23.5889	24.1148	24.4694	23.9728	24.3344	23.2687	24.2832	23.5265
Q9CY64	BIEA_MOUSE	Blvra	Biliverdin reductase A		0	NaN	3	3	3	14.2	14.2	14.2	33.524	0.0029283	5.1134	3995600	4	NaN	NaN	NaN	NaN	NaN	NaN	NaN	NaN	NaN	NaN
Q9CYN9	RENR_MOUSE	Atp6ap2	Renin receptor		0.140944	0.232552	3	3	3	15.7	15.7	15.7	39.091	0.0019011	10.633	56625000	29	23.2595	24.2145	NaN	NaN	22.6502	23.0017	23.2826	NaN	NaN	NaN
Q9CYW4	HDHD3_MOUSE	Hdhd3	Haloacid dehalogenase-like hydrolase domain-containing protein 3		0	-0.36562	2	2	2	11.6	11.6	11.6	28.027	0.0030581	5.6382	14218000	7	20.7247	NaN	NaN	NaN	NaN	NaN	NaN	NaN	21.0903	NaN
F6VQ81	F6VQ81_MOUSE	Tpd52l2	Tumor protein D54 (Fragment)		0	NaN	3	3	3	21.7	21.7	21.7	17.619	0.0017331	7.8756	4873600	5	NaN	NaN	NaN	NaN	NaN	NaN	NaN	NaN	NaN	NaN
Q9CZ30	OLA1_MOUSE	Ola1	Obg-like ATPase 1		0.996251	0.369545	6	6	6	24	24	24	44.729	0	44.435	77394000	37	23.7528	23.2035	23.7132	NaN	23.6675	23.4639	NaN	NaN	23.0997	23.0806
J3QN06	J3QN06_MOUSE	Naxd	ATP-dependent (S)-NAD(P)H-hydrate dehydratase		0.199987	-0.217323	4	4	4	21.3	21.3	21.3	29.133	0.0019305	11.249	37575000	15	22.1888	NaN	NaN	NaN	22.2556	NaN	NaN	NaN	22.8251	22.0539
Q9CZ44	NSF1C_MOUSE	Nsfl1c	NSFL1 cofactor p47		0.522146	-0.304908	6	6	6	20	20	20	40.709	0	24.598	51036000	41	21.0115	20.1308	21.104	21.0318	20.3865	21.1669	NaN	NaN	20.9358	21.0107
Q9CZD3	GARS_MOUSE	Gars1	Glycine--tRNA ligase		0.521923	-0.383723	7	7	7	12.6	12.6	12.6	81.877	0	48.619	73701000	38	21.2398	20.7455	NaN	20.3785	21.7191	21.2613	21.0437	NaN	21.8516	21.4611
Q9CZU6	CISY_MOUSE	Cs	Citrate synthase, mitochondrial		0.865515	-0.544553	11	11	11	22.6	22.6	22.6	51.736	0	37.295	365360000	111	24.2252	23.1221	22.6065	22.7687	22.6534	23.5335	24.0247	23.3137	23.8146	23.4122
Q9D051	ODPB_MOUSE	Pdhb	Pyruvate dehydrogenase E1 component subunit beta, mitochondrial		0.20574	0.209501	4	4	4	13.9	13.9	13.9	38.937	0.001938	11.284	33654000	18	21.0343	NaN	NaN	NaN	20.4723	NaN	NaN	NaN	20.7745	20.3131
Q9D0F9	PGM1_MOUSE	Pgm1	Phosphoglucomutase-1		1.48554	-0.612846	11	11	11	25.3	25.3	25.3	61.417	0	69.099	61036000	39	20.7668	NaN	20.6535	20.5315	20.7276	21.2572	NaN	NaN	21.7091	20.8817
Q9D0I9	SYRC_MOUSE	Rars1	Arginine--tRNA ligase, cytoplasmic		0.0216392	-0.0346155	12	12	12	21.7	21.7	21.7	75.673	0	137.31	155670000	103	23.5416	21.9143	22.4031	NaN	23.5908	23.0013	21.9612	22.36	24.0595	23.1034
Q3UJQ9	Q3UJQ9_MOUSE	Oxct1	Succinyl-CoA:3-ketoacid-coenzyme A transferase		0.164244	-0.21755	9	9	9	29.4	29.4	29.4	52.278	0	323.31	176800000	75	23.3809	21.736	22.2427	NaN	22.323	22.6897	22.4211	21.8703	24.0023	22.2073
Q9D0R2	SYTC_MOUSE	Tars1	Threonine--tRNA ligase 1, cytoplasmic		0	0.127494	4	4	4	6.6	6.6	6.6	83.355	0.0020121	12.533	29982000	20	22.7	NaN	NaN	NaN	NaN	NaN	NaN	NaN	22.7804	22.3647
Q9D0S9	HINT2_MOUSE	Hint2	Histidine triad nucleotide-binding protein 2, mitochondrial		0	NaN	2	2	2	17.2	17.2	17.2	17.32	0.0029806	5.2454	15979000	12	NaN	NaN	NaN	NaN	NaN	NaN	NaN	NaN	NaN	NaN
Q9D172	GAL3A_MOUSE	Gatd3a	Glutamine amidotransferase-like class 1 domain-containing protein 3A, mitochondrial		0	NaN	3	3	3	27.1	27.1	27.1	28.09	0	27.065	18055000	9	NaN	NaN	NaN	NaN	NaN	NaN	NaN	NaN	NaN	NaN
Q9D1A2	CNDP2_MOUSE	Cndp2	Cytosolic non-specific dipeptidase		1.04887	-0.479536	14	14	14	42.3	42.3	42.3	52.767	0	323.31	417890000	133	23.3935	22.4828	22.5104	22.8028	23.2974	23.202	23.2045	NaN	23.7287	23.3724
Q9D1E6	TBCB_MOUSE	Tbcb	Tubulin-folding cofactor B		0	NaN	2	2	2	7.8	7.8	7.8	27.385	0.0041841	4.617	7527100	3	NaN	NaN	NaN	NaN	NaN	NaN	NaN	NaN	NaN	NaN
A0A494BA38	A0A494BA38_MOUSE	Rab1b	Ras-related protein Rab-1B		0	NaN	4	1	1	32.4	11.5	11.5	20.186	0.0029851	5.2515	6979600	5	NaN	NaN	NaN	NaN	NaN	NaN	NaN	NaN	NaN	NaN
Q9D1L0	CHCH2_MOUSE	Chchd2	Coiled-coil-helix-coiled-coil-helix domain-containing protein 2		0	NaN	1	1	1	15.7	15.7	15.7	15.661	0.007772	3.8016	0	1	NaN	NaN	NaN	NaN	NaN	NaN	NaN	NaN	NaN	NaN
Q9D1M0	SEC13_MOUSE	Sec13	Protein SEC13 homolog		0	NaN	2	2	2	15.2	15.2	15.2	35.565	0	216.57	4257000	6	NaN	NaN	NaN	NaN	NaN	NaN	NaN	NaN	NaN	NaN
Q9D2M8	UB2V2_MOUSE	Ube2v2	Ubiquitin-conjugating enzyme E2 variant 2		0.457394	-0.242331	5	5	5	29	29	29	16.367	0	27.908	72659000	32	22.3741	21.836	22.0175	NaN	22.6618	22.3319	NaN	NaN	22.6681	22.394
Q9D2R0	AACS_MOUSE	Aacs	Acetoacetyl-CoA synthetase		0.25553	0.307245	7	7	7	17.9	17.9	17.9	75.199	0	82.132	77661000	28	23.3069	NaN	22.3313	NaN	23.1844	22.3339	NaN	NaN	23.3624	22.2045
Q9D358	PPAC_MOUSE	Acp1	Low molecular weight phosphotyrosine protein phosphatase		0	NaN	4	4	4	24.7	24.7	24.7	18.192	0.0017637	8.5594	54044000	20	NaN	NaN	NaN	NaN	NaN	22.5077	NaN	22.2881	22.7047	22.8146
Q9D3H2	OBP1A_MOUSE	Obp1a	Odorant-binding protein 1a		0	NaN	4	4	4	30.1	30.1	30.1	18.469	0.0018315	9.4035	10343000	6	NaN	NaN	NaN	NaN	NaN	NaN	NaN	NaN	NaN	NaN
Q9D6Y7	MSRA_MOUSE	Msra	Mitochondrial peptide methionine sulfoxide reductase		0	NaN	3	3	3	15.9	15.9	15.9	25.988	0.0030395	5.4713	4782900	5	NaN	NaN	NaN	NaN	NaN	NaN	NaN	NaN	NaN	NaN
Q9D6Y9	GLGB_MOUSE	Gbe1	1,4-alpha-glucan-branching enzyme		0	NaN	2	2	2	4	4	4	80.363	0.0016694	7.1795	10796000	8	NaN	NaN	NaN	NaN	NaN	NaN	NaN	NaN	NaN	NaN
Q9D7X8	GGCT_MOUSE	Ggct	Gamma-glutamylcyclotransferase		0	NaN	2	2	2	11.7	11.7	11.7	21.166	0.0021186	15.534	13592000	9	NaN	NaN	NaN	NaN	NaN	NaN	NaN	NaN	NaN	NaN
Q9D819	IPYR_MOUSE	Ppa1	Inorganic pyrophosphatase		0.391055	-0.215612	13	13	13	61.2	61.2	61.2	32.667	0	149.76	531600000	149	23.7654	23.4603	23.2771	23.1538	24.2083	23.8705	23.3915	23.5093	24.2795	23.892
Q9D8B3	CHM4B_MOUSE	Chmp4b	Charged multivesicular body protein 4b		0	NaN	1	1	1	6.2	6.2	6.2	24.936	0.0017794	8.7423	11590000	9	NaN	NaN	NaN	NaN	NaN	NaN	NaN	NaN	NaN	NaN
Q9D8N0	EF1G_MOUSE	Eef1g	Elongation factor 1-gamma		0.0147908	-0.00895195	14	14	14	35.9	35.9	35.9	50.06	0	323.31	828890000	264	24.7412	24.5431	24.426	24.4859	25.2374	24.8023	24.3314	24.425	25.1366	24.783
Q9D8S3	ARFG3_MOUSE	Arfgap3	ADP-ribosylation factor GTPase-activating protein 3		0	NaN	1	1	1	3.6	3.6	3.6	57.455	0.0078637	3.932	1962800	2	NaN	NaN	NaN	NaN	NaN	NaN	NaN	NaN	NaN	NaN
A0A1L1SS58	A0A1L1SS58_MOUSE	Rexo2	Oligoribonuclease, mitochondrial (Fragment)		0	NaN	1	1	1	13.6	13.6	13.6	15.433	0.001912	10.812	10462000	4	NaN	NaN	NaN	NaN	NaN	NaN	NaN	NaN	NaN	NaN
Q9D9V3	ECHD1_MOUSE	Echdc1	Ethylmalonyl-CoA decarboxylase		0.329183	-0.452222	14	14	14	50.3	50.3	50.3	35.467	0	323.31	401890000	137	25.2057	23.6359	23.3106	23.3049	25.4898	24.5042	24.1475	NaN	25.3887	24.5261
Q9DAK9	PHP14_MOUSE	Phpt1	14 kDa phosphohistidine phosphatase		0	NaN	2	2	2	18.5	18.5	18.5	13.996	0.0042553	4.7812	12495000	8	NaN	NaN	NaN	NaN	NaN	NaN	NaN	NaN	NaN	NaN
B0V2V1	B0V2V1_MOUSE	Cnpy3	Protein canopy homolog 3		0	NaN	1	1	1	11	11	11	12.888	0.0097919	3.3864	515810	1	NaN	NaN	NaN	NaN	NaN	NaN	NaN	NaN	NaN	NaN
Q9DBB9	CPN2_MOUSE	Cpn2	Carboxypeptidase N subunit 2		0.204369	-0.200347	10	10	10	25.6	25.6	25.6	60.478	0	180.52	287700000	117	22.9708	24.0017	23.6169	24.1726	23.2836	23.8537	24.1406	24.6829	22.7044	23.6658
Q9DBD0	ICA_MOUSE	Ica	Inhibitor of carbonic anhydrase		0.101251	0.0648369	20	19	19	42.7	41.6	41.6	76.765	0	323.31	1089900000	359	24.322	24.9171	24.8699	24.9406	24.1677	24.3909	24.7752	25.0379	24.0342	24.6549
Q9DBF1	AL7A1_MOUSE	Aldh7a1	Alpha-aminoadipic semialdehyde dehydrogenase		0.682208	-0.510563	8	8	8	21.5	21.5	21.5	58.861	0	72.132	102910000	53	23.0069	22.0277	21.5447	21.8946	22.8385	22.8812	22.3842	NaN	23.3087	22.518
Q9DBG5	PLIN3_MOUSE	Plin3	Perilipin-3		0	NaN	4	4	4	17.4	17.4	17.4	47.262	0	29.386	38794000	8	NaN	NaN	NaN	NaN	NaN	NaN	NaN	NaN	NaN	NaN
Q9DBJ1	PGAM1_MOUSE	Pgam1	Phosphoglycerate mutase 1		0.0498347	-0.048402	8	8	8	38.6	38.6	38.6	28.832	0	323.31	2423600000	326	26.9931	26.3667	26.0875	25.5966	27.0641	26.5819	26.1519	25.9861	27.166	26.4641
Q9DBL7	COASY_MOUSE	Coasy	Bifunctional coenzyme A synthase		0	NaN	3	3	3	9.1	9.1	9.1	62.022	0.0015576	5.8384	4678300	3	NaN	NaN	NaN	NaN	NaN	NaN	NaN	NaN	NaN	NaN
Q9DBL9	ABHD5_MOUSE	Abhd5	1-acylglycerol-3-phosphate O-acyltransferase ABHD5		0	NaN	3	3	3	12.8	12.8	12.8	39.154	0.0016077	6.504	9395200	7	NaN	NaN	NaN	NaN	NaN	NaN	NaN	NaN	NaN	NaN
Q9DBP0	NPT2B_MOUSE	Slc34a2	Sodium-dependent phosphate transport protein 2B		0.611478	-0.34885	3	3	3	3.4	3.4	3.4	76.244	0	48.045	246680000	72	NaN	22.5819	22.9721	23.1261	22.6499	NaN	NaN	23.4531	22.9096	NaN
Q9DBP5	KCY_MOUSE	Cmpk1	UMP-CMP kinase		1.3506	-0.620967	6	6	6	37.2	37.2	37.2	22.165	0	112.5	641040000	129	23.9505	23.4646	23.6428	23.3736	24.3516	24.4096	24.1434	23.845	24.9862	24.5038
Q9DCD0	6PGD_MOUSE	Pgd	6-phosphogluconate dehydrogenase, decarboxylating		0.0528328	0.0386353	24	24	24	56.9	56.9	56.9	53.247	0	323.31	5179000000	1013	26.6363	25.7993	26.2175	25.7902	26.6663	26.2387	26.0266	25.679	26.7603	26.2118
D3Z3A0	D3Z3A0_MOUSE	Ppp1r2	Protein phosphatase inhibitor 2		0	NaN	1	1	1	12.8	12.8	12.8	21.919	0.007874	3.9396	6623600	4	NaN	NaN	NaN	NaN	NaN	NaN	NaN	NaN	NaN	NaN
Q9DCN2	NB5R3_MOUSE	Cyb5r3	NADH-cytochrome b5 reductase 3		0	NaN	4	4	4	19.9	19.9	19.9	34.127	0.0021882	16.948	22568000	12	NaN	NaN	NaN	NaN	NaN	NaN	NaN	NaN	NaN	NaN
D3YZM4	D3YZM4_MOUSE	Mettl26	Methyltransferase-like 26		0	NaN	1	1	1	39.5	39.5	39.5	9.0151	0.0017212	7.726	1724100	1	NaN	NaN	NaN	NaN	NaN	NaN	NaN	NaN	NaN	NaN
Q8CEB6	Q8CEB6_MOUSE	Akr1e1	Aldo-keto reductase family 1, member E1		0	NaN	1	1	1	5.7	5.7	5.7	28.264	0.0096735	3.3106	1904000	1	NaN	NaN	NaN	NaN	NaN	NaN	NaN	NaN	NaN	NaN
Q9DCW4	ETFB_MOUSE	Etfb	Electron transfer flavoprotein subunit beta		0.242248	0.315506	6	6	6	31.8	31.8	31.8	27.623	0	90.56	92871000	45	23.5446	NaN	NaN	NaN	22.6491	22.8844	NaN	NaN	23.2204	22.2393
Q9EPB4	ASC_MOUSE	Pycard	Apoptosis-associated speck-like protein containing a CARD		0.845897	-0.418029	6	6	6	39.4	39.4	39.4	21.458	0	44.517	80907000	41	23.1039	22.96	NaN	22.5373	22.9226	23.2116	NaN	23.0463	23.9336	23.0043
A0A494B9H1	A0A494B9H1_MOUSE	Sil1	Nucleotide exchange factor SIL1		0.323822	-0.153905	4	4	4	11.5	11.5	11.5	46.779	0.0020325	13.166	88464000	39	23.1821	22.8843	23.3076	22.8441	22.9834	23.1174	23.6077	23.5925	22.6295	23.024
Q9EPL8	IPO7_MOUSE	Ipo7	Importin-7		0	-0.2733	4	4	4	4.8	4.8	4.8	119.49	0.0017575	8.4479	7622000	9	20.2656	NaN	NaN	NaN	NaN	NaN	NaN	NaN	20.5389	NaN
Q9EQ20	MMSA_MOUSE	Aldh6a1	Methylmalonate-semialdehyde dehydrogenase [acylating], mitochondrial		0	NaN	7	7	7	20.4	20.4	20.4	57.915	0	60.218	32068000	19	21.968	NaN	NaN	NaN	21.5182	NaN	NaN	NaN	NaN	NaN
Q9EQH2	ERAP1_MOUSE	Erap1	Endoplasmic reticulum aminopeptidase 1		0	NaN	2	2	2	2.4	2.4	2.4	106.6	0.0098644	3.4321	1685900	2	NaN	NaN	NaN	NaN	NaN	NaN	NaN	NaN	NaN	NaN
Q9ER41	TOR1B_MOUSE	Tor1b	Torsin-1B		0	NaN	3	3	3	10.4	10.4	10.4	37.817	0.0016181	6.658	10617000	13	NaN	NaN	NaN	NaN	NaN	NaN	NaN	NaN	NaN	NaN
Q9ER72	SYCC_MOUSE	Cars1	Cysteine--tRNA ligase, cytoplasmic		0.061079	-0.0258827	5	5	5	7.8	7.8	7.8	94.859	0	47.26	57505000	24	21.0832	NaN	NaN	NaN	21.2505	20.9939	NaN	NaN	21.3181	21.2661
Q9ERH8	S28A3_MOUSE	Slc28a3	Solute carrier family 28 member 3		0.338159	-0.437254	3	3	3	5.3	5.3	5.3	78.309	0	43.756	115700000	49	NaN	23.0584	23.6891	22.5079	21.3835	23.108	23.2146	23.6547	22.4107	NaN
Q9ESY9	GILT_MOUSE	Ifi30	Gamma-interferon-inducible lysosomal thiol reductase		1.79941	0.831738	2	2	2	12.9	12.9	12.9	27.784	0	48.496	177430000	124	24.2053	24.4283	24.0659	24.8214	23.6555	23.2876	23.9778	23.574	23.383	22.7952
Q9JHH6	CBPB2_MOUSE	Cpb2	Carboxypeptidase B2		0	-0.106913	4	4	3	10.9	10.9	9	48.87	0.001992	12.063	66726000	31	NaN	22.5681	22.1435	NaN	21.7925	22.2749	NaN	NaN	NaN	NaN
Q9JHI5	IVD_MOUSE	Ivd	Isovaleryl-CoA dehydrogenase, mitochondrial		0	-1.12169	3	3	3	10.4	10.4	10.4	46.325	0.0017153	7.685	27394000	14	NaN	NaN	NaN	NaN	20.0587	NaN	NaN	NaN	21.5654	20.7953
Q9JHK4	PGTA_MOUSE	Rabggta	Geranylgeranyl transferase type-2 subunit alpha		0	NaN	3	3	3	6.3	6.3	6.3	64.989	0.0029028	5.0065	4912300	4	NaN	NaN	NaN	NaN	NaN	NaN	NaN	NaN	NaN	NaN
E9Q9P1	E9Q9P1_MOUSE	Lztfl1	Leucine zipper transcription factor-like protein 1		0	NaN	2	2	2	16.4	16.4	16.4	15.518	0.0088608	3.5995	2017000	2	NaN	NaN	NaN	NaN	NaN	NaN	NaN	NaN	NaN	NaN
F6RPJ9	F6RPJ9_MOUSE	Ide	Insulin-degrading enzyme (Fragment)		0.136138	0.146448	5	5	5	6.4	6.4	6.4	114.15	0.0018657	10.134	76598000	22	23.963	24.4706	NaN	NaN	NaN	NaN	NaN	NaN	23.8003	24.3404
Q9JHW2	NIT2_MOUSE	Nit2	Omega-amidase NIT2		0	-0.629678	5	5	5	24.6	24.6	24.6	30.501	0.0022173	17.816	34116000	19	21.8041	NaN	NaN	NaN	21.0813	NaN	NaN	NaN	22.0724	NaN
Q9JII6	AK1A1_MOUSE	Akr1a1	Aldo-keto reductase family 1 member A1		0.976939	-0.339437	8	8	8	30.2	30.2	30.2	36.586	0	323.31	429010000	101	24.1746	23.7782	23.7396	23.7699	24.5694	24.5216	24.4483	24.0603	24.4986	24.2001
D6RFD9	D6RFD9_MOUSE	Abcb9	ATP-binding cassette sub-family B member 9		0	NaN	1	1	1	2.6	2.6	2.6	29.521	0	28.823	219700000	20	NaN	NaN	NaN	NaN	NaN	NaN	NaN	NaN	NaN	NaN
Q9JJN5	CBPN_MOUSE	Cpn1	Carboxypeptidase N catalytic chain		0.0773878	-0.0407133	4	4	4	11.2	11.2	11.2	51.845	0	22.045	51673000	29	NaN	23.1833	NaN	23.1021	22.5716	22.9046	23.1515	23.1089	NaN	22.8071
Q9JK38	GNA1_MOUSE	Gnpnat1	Glucosamine 6-phosphate N-acetyltransferase		0	NaN	3	3	3	35.3	35.3	35.3	20.791	0	62.529	6382900	6	NaN	NaN	NaN	NaN	NaN	NaN	NaN	NaN	NaN	NaN
Q9JKB1	UCHL3_MOUSE	Uchl3	Ubiquitin carboxyl-terminal hydrolase isozyme L3		0.16107	-0.109058	5	5	5	29.1	29.1	29.1	26.151	0.0019685	11.839	36295000	23	21.5581	NaN	20.9101	NaN	21.3651	21.4013	NaN	NaN	21.3724	NaN
Q9JKF1	IQGA1_MOUSE	Iqgap1	Ras GTPase-activating-like protein IQGAP1		0	NaN	3	3	3	2.1	2.1	2.1	188.74	0.0029369	5.1173	4350600	3	NaN	NaN	NaN	NaN	NaN	NaN	NaN	NaN	NaN	NaN
Q9JKR6	HYOU1_MOUSE	Hyou1	Hypoxia up-regulated protein 1		0	NaN	7	7	7	10.2	10.2	10.2	111.18	0.0021053	15.093	28339000	19	21.525	21.1983	NaN	NaN	21.9633	NaN	NaN	NaN	NaN	NaN
Q9JKX6	NUDT5_MOUSE	Nudt5	ADP-sugar pyrophosphatase		0	NaN	3	3	3	17	17	17	23.984	0.0015528	5.8272	16276000	11	NaN	NaN	NaN	NaN	NaN	NaN	NaN	NaN	NaN	NaN
Q9JLJ2	AL9A1_MOUSE	Aldh9a1	4-trimethylaminobutyraldehyde dehydrogenase		0.293025	-0.230799	12	12	12	32.4	32.4	32.4	53.514	0	275.73	436550000	122	24.8191	23.9758	24.2271	23.991	24.6559	24.7988	24.4004	23.5609	25.2679	24.7949
E9PYI8	E9PYI8_MOUSE	Usp14	Ubiquitin carboxyl-terminal hydrolase		0	0.211836	5	5	5	13.1	13.1	13.1	52.318	0.0021413	16.183	36379000	22	NaN	NaN	NaN	NaN	21.8488	21.6241	NaN	NaN	21.9006	21.3863
Q9JMH6	TRXR1_MOUSE	Txnrd1	Thioredoxin reductase 1, cytoplasmic		0.0406616	0.0372364	9	9	9	21	21	21	67.083	0	46.652	184440000	84	24.6085	24.175	23.8074	23.2487	24.3126	24.2343	23.3543	23.7139	24.6455	24.018
Q9JMK0	B4GT5_MOUSE	B4galt5	Beta-1,4-galactosyltransferase 5		0	NaN	1	1	1	2.1	2.1	2.1	44.814	0.0022124	17.762	1069300000	104	NaN	NaN	NaN	NaN	NaN	NaN	NaN	NaN	NaN	NaN
Q9QUH0	GLRX1_MOUSE	Glrx	Glutaredoxin-1		1.67968	-0.626815	4	4	4	49.5	49.5	49.5	11.871	0	323.31	246390000	105	24.2954	23.5821	NaN	23.6847	23.2187	24.1822	24.5015	24.2782	24.4666	24.1818
Q9QUR6	PPCE_MOUSE	Prep	Prolyl endopeptidase		0	NaN	3	3	3	5.9	5.9	5.9	80.751	0	21.477	9479700	15	NaN	NaN	NaN	NaN	NaN	20.8503	NaN	NaN	20.9654	NaN
Q9QUR8	SEM7A_MOUSE	Sema7a	Semaphorin-7A		0.1326	0.0788128	11	11	11	28.5	28.5	28.5	74.993	0	100.13	649610000	129	24.436	24.9809	24.782	24.3335	24.5122	24.5228	24.8449	24.9742	23.8679	24.4408
Q9QWR8	NAGAB_MOUSE	Naga	Alpha-N-acetylgalactosaminidase		0	NaN	3	3	3	8	8	8	47.234	0.0041379	4.4873	7422400	5	NaN	NaN	NaN	NaN	NaN	NaN	NaN	NaN	NaN	NaN
Q9QXC1	FETUB_MOUSE	Fetub	Fetuin-B		0.267541	-0.195075	10	10	10	36.1	36.1	36.1	42.712	0	323.31	1192800000	213	24.4463	25.1366	24.7569	24.5979	23.6489	24.5206	24.9372	25.029	24.0888	24.9865
Q9QXG4	ACSA_MOUSE	Acss2	Acetyl-coenzyme A synthetase, cytoplasmic		0.516752	0.270684	10	10	10	23.5	23.5	23.5	78.861	0	94.74	53230000	34	22.4287	NaN	NaN	NaN	22.1681	22.1763	NaN	NaN	21.8792	NaN
A0A0R4J218	A0A0R4J218_MOUSE	Plec	Plectin (Fragment)		0	NaN	1	1	1	1.2	1.2	1.2	111.66	0.0040323	4.1477	0	3	NaN	NaN	NaN	NaN	NaN	NaN	NaN	NaN	NaN	NaN
A0A1W2P729	A0A1W2P729_MOUSE	Cnpy2	Protein canopy homolog 2 (Fragment)		0	NaN	1	1	1	11.8	11.8	11.8	15.316	0.0021505	16.313	2950800	2	NaN	NaN	NaN	NaN	NaN	NaN	NaN	NaN	NaN	NaN
Q9QYB1	CLIC4_MOUSE	Clic4	Chloride intracellular channel protein 4		0	NaN	3	3	3	17	17	17	28.729	0.0016639	7.1185	23921000	9	NaN	NaN	21.9027	21.5607	NaN	NaN	NaN	NaN	NaN	NaN
D3YXG2	D3YXG2_MOUSE	Nagk	GlcNAc kinase		0	NaN	4	4	4	17.2	17.2	17.2	36.198	0.0017606	8.4872	17317000	5	NaN	NaN	NaN	NaN	NaN	NaN	NaN	NaN	NaN	NaN
Q9QZA0	CAH5B_MOUSE	Ca5b	Carbonic anhydrase 5B, mitochondrial		0	NaN	1	1	1	4.1	4.1	4.1	36.622	0.0030303	5.4667	32331000	11	NaN	NaN	NaN	NaN	NaN	NaN	NaN	NaN	NaN	NaN
A0A1B0GRV4	A0A1B0GRV4_MOUSE	Dkkl1	Dickkopf-like protein 1		0	NaN	4	4	4	25.1	25.1	25.1	21.372	0.0021231	15.54	33150000	19	21.0231	NaN	20.5763	NaN	NaN	NaN	NaN	NaN	NaN	NaN
Q9R0E1	PLOD3_MOUSE	Plod3	Multifunctional procollagen lysine hydroxylase and glycosyltransferase LH3		0.204562	-0.101937	4	4	4	5.5	5.5	5.5	84.921	0.0020161	12.588	38987000	26	20.4743	20.6579	20.9628	21.16	NaN	20.7458	20.9641	NaN	NaN	21.0372
Q9R0N0	GALK1_MOUSE	Galk1	Galactokinase		0	NaN	2	2	2	5.9	5.9	5.9	42.295	0.0042857	4.8955	2946000	5	NaN	NaN	NaN	NaN	NaN	NaN	NaN	NaN	NaN	NaN
Q9R0P3	ESTD_MOUSE	Esd	S-formylglutathione hydrolase		0.380199	-0.214862	6	6	6	35.8	35.8	35.8	31.319	0	110.42	166150000	62	22.8285	21.9817	22.3761	21.8525	22.5985	22.7081	22.1437	22.1348	22.9836	22.7414
Q9R0P5	DEST_MOUSE	Dstn	Destrin		0.138409	-0.0971226	4	4	4	29.7	29.7	29.7	18.521	0	323.31	136310000	62	21.8297	21.5612	21.7177	20.9657	22.1153	21.7126	21.4069	21.2549	22.2751	22.0258
Q9R0Q7	TEBP_MOUSE	Ptges3	Prostaglandin E synthase 3		0	NaN	2	2	2	15.6	15.6	15.6	18.721	0.0022883	19.982	27156000	13	23.0286	22.3133	NaN	NaN	NaN	NaN	NaN	NaN	NaN	NaN
Q9R111	GUAD_MOUSE	Gda	Guanine deaminase		0	0.138283	4	4	4	10.8	10.8	10.8	51.012	0.0018051	9.024	21116000	25	NaN	20.5701	NaN	NaN	21.1499	NaN	NaN	NaN	20.7217	NaN
Q3TKX1	Q3TKX1_MOUSE	Atp6ap1	ATPase, H+ transporting, lysosomal accessory protein		0.112291	0.0686604	5	5	5	18.8	18.8	18.8	45.534	0	119.96	231150000	86	23.9853	24.2016	24.0263	24.1773	23.2657	23.8537	24.4103	23.8908	23.5602	23.598
Q9WTL7	LYPA2_MOUSE	Lypla2	Acyl-protein thioesterase 2		0	NaN	2	2	2	19	19	19	24.794	0.0017953	9.0039	14759000	10	NaN	NaN	NaN	NaN	NaN	NaN	NaN	NaN	22.5863	22.3551
Q9WTP6	KAD2_MOUSE	Ak2	Adenylate kinase 2, mitochondrial		0.128894	-0.184208	9	9	9	43.9	43.9	43.9	26.468	0	55.607	217800000	87	22.8341	21.4211	21.3996	21.1875	22.5471	23.0794	21.7478	20.5942	22.5888	22.3002
Q9WTP7	KAD3_MOUSE	Ak3	GTP:AMP phosphotransferase AK3, mitochondrial		0	-0.8119	5	5	5	27.8	27.8	27.8	25.426	0	34.443	25212000	15	20.8444	NaN	NaN	NaN	20.885	NaN	NaN	NaN	21.6766	NaN
Q9WTX5	SKP1_MOUSE	Skp1	S-phase kinase-associated protein 1		0	NaN	1	1	1	8	8	8	18.672	0.0017301	7.8393	8509400	5	NaN	NaN	NaN	NaN	NaN	NaN	NaN	NaN	NaN	NaN
Q9WU78	PDC6I_MOUSE	Pdcd6ip	Programmed cell death 6-interacting protein		0.116602	-0.223734	10	10	10	15.8	15.8	15.8	96.023	0	45.17	84105000	40	21.4113	NaN	NaN	20.5285	21.3842	20.3674	NaN	NaN	22.5289	21.0989
Q9WUA2	SYFB_MOUSE	Farsb	Phenylalanine--tRNA ligase beta subunit		0	NaN	2	2	2	4.1	4.1	4.1	65.696	0.0089859	3.6981	4427900	2	NaN	NaN	NaN	NaN	NaN	NaN	NaN	NaN	NaN	NaN
Q9WUK2	IF4H_MOUSE	Eif4h	Eukaryotic translation initiation factor 4H		0.807675	-0.429341	4	4	4	24.2	24.2	24.2	27.341	0	23.647	60008000	41	21.8558	21.7153	NaN	22.0957	22.6036	22.5876	22.0357	22.0983	22.8944	22.8688
Q9WUM5	SUCA_MOUSE	Suclg1	Succinate--CoA ligase [ADP/GDP-forming] subunit alpha, mitochondrial		0	NaN	2	2	2	7.8	7.8	7.8	36.154	0.0029112	5.0171	5785900	6	NaN	NaN	NaN	NaN	NaN	NaN	NaN	NaN	NaN	NaN
Q9WUU7	CATZ_MOUSE	Ctsz	Cathepsin Z		1.04129	0.830793	8	8	8	28.1	28.1	28.1	33.996	0	66.744	397510000	111	21.5818	23.3339	23.5088	23.5262	23.488	21.8337	22.4382	22.9923	21.9523	22.0683
Q9WV54	ASAH1_MOUSE	Asah1	Acid ceramidase		0	1.30338	9	9	9	30.7	30.7	30.7	44.669	0	66.567	81860000	53	22.8709	23.1795	23.2565	22.3586	23.0088	NaN	NaN	NaN	21.6315	NaN
Q9WVJ3	CBPQ_MOUSE	Cpq	Carboxypeptidase Q		0.753191	0.664035	6	6	6	19.4	19.4	19.4	51.813	0.0020964	14.939	36663000	23	NaN	22.4171	NaN	22.6764	NaN	22.1791	NaN	NaN	NaN	21.5863
Q9Z0J0	NPC2_MOUSE	Npc2	NPC intracellular cholesterol transporter 2		0	NaN	4	4	4	30.9	30.9	30.9	16.442	0.0019455	11.333	146470000	30	22.6132	23.0898	22.9232	22.4559	22.4941	NaN	NaN	NaN	NaN	NaN
Q9Z0L8	GGH_MOUSE	Ggh	Gamma-glutamyl hydrolase		0	NaN	2	2	2	9.5	9.5	9.5	35.469	0.0030257	5.4522	30925000	17	NaN	NaN	NaN	NaN	NaN	NaN	NaN	NaN	NaN	NaN
Q9Z0M5	LICH_MOUSE	Lipa	Lysosomal acid lipase/cholesteryl ester hydrolase		1.87476	1.18674	7	7	7	28.2	28.2	28.2	45.325	0	36.778	262500000	82	23.9715	24.0017	24.391	23.736	23.2463	22.7558	22.6094	NaN	NaN	NaN
Q9Z0M9	I18BP_MOUSE	Il18bp	Interleukin-18-binding protein		0	NaN	2	2	2	15.5	15.5	15.5	21.257	0.0042194	4.7273	13537000	11	NaN	NaN	NaN	NaN	NaN	NaN	NaN	NaN	NaN	NaN
A2AAW9	A2AAW9_MOUSE	Eif2s3x	Eukaryotic translation initiation factor 2 subunit 3, X-linked		0	NaN	2	2	2	7.3	7.3	7.3	37.194	0.0078431	3.8944	7290200	7	NaN	NaN	NaN	NaN	NaN	NaN	NaN	NaN	NaN	NaN
Q9Z0S1	BPNT1_MOUSE	Bpnt1	3(2),5-bisphosphate nucleotidase 1		1.06827	-0.48733	13	13	13	55.5	55.5	55.5	33.196	0	62.139	226370000	103	21.9652	21.6944	21.7472	21.4667	22.5474	22.5017	21.924	22.0399	22.799	22.593
A0A3B2WBH9	A0A3B2WBH9_MOUSE	Tjp2	Tight junction protein ZO-2		0	NaN	1	1	1	1	1	1	131.1	0.0089744	3.6967	9119400000	583	NaN	NaN	NaN	NaN	NaN	NaN	NaN	NaN	NaN	NaN
Q9Z1Q5	CLIC1_MOUSE	Clic1	Chloride intracellular channel protein 1		0.551423	-0.381403	6	6	6	34	34	34	27.013	0	190.65	234400000	105	23.9278	NaN	23.2032	22.6075	23.7551	24.124	23.6907	23.2078	24.121	23.6306
Q9Z1Q9	SYVC_MOUSE	Vars1	Valine--tRNA ligase		0.393045	0.197854	12	12	12	13.6	13.6	13.6	140.21	0	75.616	54797000	39	21.8729	21.4427	21.3611	NaN	21.9796	21.6252	NaN	NaN	21.5908	21.1827
Q9Z1R3	APOM_MOUSE	Apom	Apolipoprotein M		0	NaN	1	1	1	3.7	3.7	3.7	21.273	0.0099256	3.4642	62623000	13	NaN	NaN	NaN	NaN	NaN	NaN	NaN	NaN	NaN	NaN
Q9Z1W9	STK39_MOUSE	Stk39	STE20/SPS1-related proline-alanine-rich protein kinase		0	NaN	2	2	2	4.7	4.7	4.7	60.319	0.0041209	4.4442	21356000	10	NaN	NaN	NaN	NaN	NaN	NaN	NaN	NaN	NaN	NaN
Q9Z1Z0	USO1_MOUSE	Uso1	General vesicular transport factor p115		0.33509	-0.129454	10	10	10	16.1	16.1	16.1	106.98	0	86.966	67320000	30	21.6433	NaN	NaN	NaN	21.7171	21.8985	21.9323	NaN	21.9131	21.4948
Q9Z1Z2	STRAP_MOUSE	Strap	Serine-threonine kinase receptor-associated protein		0.165116	0.100929	7	7	7	27.7	27.7	27.7	38.442	0.0021978	17.062	29259000	16	21.2849	NaN	NaN	NaN	20.9181	21.111	NaN	NaN	20.8902	NaN
Q9Z2I8	SUCB2_MOUSE	Suclg2	Succinate--CoA ligase [GDP-forming] subunit beta, mitochondrial		0.736954	-0.805401	6	6	6	16.9	16.9	16.9	46.839	0	127.57	81478000	40	21.5798	19.6908	19.6566	19.1839	21.2568	20.9411	21.2395	NaN	21.0469	21.0885
Q9Z2M7	PMM2_MOUSE	Pmm2	Phosphomannomutase 2		0	0.00208702	6	6	6	23.1	23.1	23.1	27.656	0	23.118	93617000	30	21.991	21.7039	21.8364	21.7197	22.2498	21.8981	NaN	NaN	NaN	NaN
A0A087WS31	A0A087WS31_MOUSE	Dnpep	Aspartyl aminopeptidase (Fragment)		0	0.0876999	3	3	3	16.2	16.2	16.2	24.834	0.003012	5.3707	10135000	5	NaN	NaN	NaN	NaN	21.2214	NaN	NaN	NaN	21.1337	NaN
Q9Z2Y8	PLPHP_MOUSE	Plpbp	Pyridoxal phosphate homeostasis protein		0.223662	0.193692	8	8	8	36.9	36.9	36.9	30.048	0	53.753	127330000	56	22.5137	21.9956	NaN	22.4389	23.442	22.6645	NaN	21.9786	22.6856	22.2867
A0A075B5K2	A0A075B5K2_MOUSE	Igkv9-124	Immunoglobulin kappa chain variable 9-124		0	NaN	2	2	2	41.1	41.1	41.1	10.419	0.0016779	7.2529	5099700	4	NaN	NaN	NaN	NaN	NaN	NaN	NaN	NaN	NaN	NaN
A0A075B5L7	A0A075B5L7_MOUSE	Igkv4-80	Immunoglobulin kappa variable 4-80 (Fragment)		0	NaN	1	1	1	13.8	13.8	13.8	12.562	0.0016949	7.437	1947400	2	NaN	NaN	NaN	NaN	NaN	NaN	NaN	NaN	NaN	NaN
A0A075B5M7	A0A075B5M7_MOUSE	Igkv5-39	Immunoglobulin kappa variable 5-39		0	NaN	3	3	2	47.4	47.4	34.7	10.345	0	79.799	90516000	35	NaN	NaN	NaN	NaN	NaN	NaN	NaN	NaN	NaN	NaN
A0A075B5N4	A0A075B5N4_MOUSE	Igkv8-27	Immunoglobulin kappa chain variable 8-27		0	NaN	3	3	2	42	42	33	10.976	0.0021097	15.194	70970000	38	NaN	NaN	NaN	NaN	NaN	NaN	NaN	23.8746	22.6719	24.6973
A0A075B5P3	A0A075B5P3_MOUSE	Ighg2b	Immunoglobulin heavy constant gamma 2B (Fragment)		0.958101	0.659055	16	16	14	54.8	54.8	49.1	36.568	0	323.31	2017000000	456	26.145	26.649	27.1141	27.5611	26.375	25.9353	26.8716	26.3515	25.2635	26.127
A0A075B5P4	A0A075B5P4_MOUSE	Ighg1	Ig gamma-1 chain C region secreted form (Fragment)		1.61428	-1.16101	10	10	10	54.9	54.9	54.9	35.633	0	323.31	1593300000	319	24.5285	23.3309	24.0208	24.9445	24.1913	25.1432	25.1419	25.9437	24.3958	26.1964
A0A075B5Q6	A0A075B5Q6_MOUSE	Ighv5-9-1	Immunoglobulin heavy variable 5-9-1		0	NaN	1	1	1	13.8	13.8	13.8	13.067	0.0078023	3.8609	3327200	3	NaN	NaN	NaN	NaN	NaN	NaN	NaN	NaN	NaN	NaN
A0A075B5R1	A0A075B5R1_MOUSE	Ighv5-17	Immunoglobulin heavy variable 5-17 (Fragment)		0	NaN	1	1	1	9.4	9.4	9.4	12.905	0.0097205	3.3304	2610100	7	NaN	NaN	NaN	NaN	NaN	NaN	NaN	NaN	NaN	NaN
A0A075B5Y4	A0A075B5Y4_MOUSE	Ighv1-81	Immunoglobulin heavy variable 1-81 (Fragment)		0	NaN	2	2	2	23.9	23.9	23.9	12.989	0	39.047	6860900	8	NaN	NaN	NaN	NaN	NaN	NaN	NaN	NaN	NaN	NaN
A0A140T8N3	A0A140T8N3_MOUSE	Igkv13-84	Immunoglobulin kappa chain variable 13-84 (Fragment)		0	NaN	1	1	1	13.9	13.9	13.9	12.617	0.0021739	16.795	1911500	4	NaN	NaN	NaN	NaN	NaN	NaN	NaN	NaN	NaN	NaN
A0A075B677	A0A075B677_MOUSE	Igkv4-53	Immunoglobulin kappa variable 4-53		0	NaN	1	1	1	22.7	22.7	22.7	10.366	0.0030441	5.5053	4966700	5	NaN	NaN	NaN	NaN	NaN	NaN	NaN	NaN	NaN	NaN
A0A075B680	A0A075B680_MOUSE	Ighv1-62-2	Immunoglobulin heavy variable 1-62-2		0	NaN	3	3	3	39	39	39	11.224	0.001642	6.9655	4551300	3	NaN	NaN	NaN	NaN	NaN	NaN	NaN	NaN	NaN	NaN
A0A075B6D5	A0A075B6D5_MOUSE	Igkv19-93	Immunoglobulin kappa chain variable 19-93		0	NaN	1	1	1	14	14	14	12.734	0	27.15	13332000	6	NaN	NaN	NaN	NaN	NaN	NaN	NaN	NaN	NaN	NaN
F6TQW2	F6TQW2_MOUSE	Ighg2c	Immunoglobulin heavy constant gamma 2C (Fragment)		0.133379	0.11762	8	6	6	22	17.3	17.3	44.095	0	100.62	109510000	48	22.4199	22.0457	22.6087	22.7532	21.7702	22.443	21.9608	NaN	NaN	NaN
A0A0A6YYE7	A0A0A6YYE7_MOUSE	Igkv4-57	Immunoglobulin kappa variable 4-57 (Fragment)		0	NaN	2	1	1	27.4	13.7	13.7	12.689	0.0043165	4.9405	0	1	NaN	NaN	NaN	NaN	NaN	NaN	NaN	NaN	NaN	NaN
A0A0B4J1E8	A0A0B4J1E8_MOUSE	Chrdl2	Chordin-like protein 2		0.376055	0.509912	3	3	3	14.1	14.1	14.1	47.712	0.0018904	10.543	43683000	26	NaN	NaN	22.4981	22.7437	21.3725	21.7706	NaN	NaN	NaN	21.6191
A0A0B4J1H8	A0A0B4J1H8_MOUSE	Igkv1-133	Immunoglobulin kappa variable 1-133 (Fragment)		0	NaN	2	2	2	17.5	17.5	17.5	13.237	0.0020661	13.842	8849600	4	NaN	NaN	NaN	NaN	NaN	NaN	NaN	NaN	NaN	NaN
A0A0B4J1I9	A0A0B4J1I9_MOUSE	Igkv4-55	Immunoglobulin kappa variable 4-55 (Fragment)		0	NaN	2	2	1	27.4	27.4	13.7	12.736	0	323.31	33586000	17	NaN	NaN	NaN	24.3001	21.274	NaN	NaN	NaN	NaN	NaN
A0A0B4J1J2	A0A0B4J1J2_MOUSE	Igkv5-43	Immunoglobulin kappa chain variable 5-43 (Fragment)		0	NaN	2	1	1	23.5	13	13	12.6	0.009828	3.42	12869000	1	NaN	NaN	NaN	NaN	NaN	NaN	NaN	NaN	NaN	NaN
A0A0B4J1J5	A0A0B4J1J5_MOUSE	Ighv9-3	Immunoglobulin heavy variable V9-3 (Fragment)		0	NaN	2	2	2	29.9	29.9	29.9	12.996	0.0042076	4.6984	2866000	4	NaN	NaN	NaN	NaN	NaN	NaN	NaN	NaN	NaN	NaN
A0A0G2JDP4	A0A0G2JDP4_MOUSE	Csn1s2b	Alpha-S2-casein-like B		0	NaN	6	1	1	62.9	14.4	14.4	15.593	0.0053121	4.0282	7608700	4	NaN	NaN	NaN	NaN	NaN	NaN	NaN	NaN	NaN	NaN
A0A0R4J0I1	A0A0R4J0I1_MOUSE	Serpina3k	Serine protease inhibitor A3K		0.515755	-0.336464	23	23	15	53.1	53.1	33.7	46.672	0	323.31	48383000000	5716	28.2169	28.7813	28.5358	29.3744	27.9546	28.8266	28.989	29.4148	28.2747	29.0401
A0A0R4J0X5	A0A0R4J0X5_MOUSE	Serpina1c	Alpha-1-antitrypsin 1-3		0.00909887	-0.00579109	21	10	3	58.8	36.3	14.3	45.854	0	323.31	22099000000	1753	29.6441	29.9238	29.3293	29.3885	29.18	29.2934	29.0692	30.02	29.3511	29.7611
A0A0R4J1L2	A0A0R4J1L2_MOUSE	Eef1d	Elongation factor 1-delta		0	NaN	8	1	1	33.9	8.2	8.2	28.728	0.004104	4.4388	12531000	6	NaN	NaN	NaN	NaN	NaN	NaN	NaN	NaN	NaN	NaN
D3YY70	D3YY70_MOUSE	Fbxl12	F-box/LRR-repeat protein 12 (Fragment)		0	NaN	1	1	1	8.3	8.3	8.3	15.056	0.0078125	3.871	315100000	13	NaN	NaN	NaN	NaN	NaN	NaN	NaN	NaN	NaN	NaN
A0A140T8M2	A0A140T8M2_MOUSE	Igkv12-44	Immunoglobulin kappa variable 12-44 (Fragment)		0	NaN	2	2	2	20	20	20	12.557	0.0020747	14.033	29197000	17	NaN	NaN	NaN	NaN	NaN	NaN	NaN	NaN	NaN	NaN
A0A140T8N5	A0A140T8N5_MOUSE	Igkv6-23	Immunoglobulin kappa variable 6-23 (Fragment)		0	NaN	2	1	1	26.1	18.3	18.3	12.787	0.0022222	17.929	4494500	4	NaN	NaN	NaN	NaN	NaN	NaN	NaN	NaN	NaN	NaN
A0A140T8N7	A0A140T8N7_MOUSE	Igkv6-25	Immunoglobulin kappa chain variable 6-25 (Fragment)		0	NaN	2	1	0	26.1	18.3	0	12.739	0.002963	5.1479	6294100	2	NaN	NaN	NaN	NaN	NaN	NaN	NaN	NaN	NaN	NaN
A0A140T8P1	A0A140T8P1_MOUSE	Igkv6-14	Immunoglobulin kappa variable 6-14 (Fragment)		0	NaN	2	2	2	20.9	20.9	20.9	12.848	0.0078534	3.915	5284400	3	NaN	NaN	NaN	NaN	NaN	NaN	NaN	NaN	NaN	NaN
A0A1B0GS57	A0A1B0GS57_MOUSE	Hpx	Hemopexin (Fragment)		0.951245	0.684654	9	3	3	35.8	17.9	17.9	21.329	0	188.07	587950000	150	22.9236	24.5215	24.4807	24.2004	23.372	23.3265	22.944	23.4702	NaN	23.1193
A0A2I3BPT0	A0A2I3BPT0_MOUSE	Glycam1	Glycosylation-dependent cell adhesion molecule 1		0.64644	0.745575	9	2	2	57	8.6	8.6	14.081	0	323.31	1049700000	346	24.1006	25.0414	26.0807	26.8338	25.5581	24.9473	25.7467	24.8907	23.7031	24.5989
A0A2I3BQE1	A0A2I3BQE1_MOUSE	AI182371	Expressed sequence AI182371		0.104706	-0.0845821	5	5	5	19.7	19.7	19.7	39.898	0	27.806	50314000	35	20.3971	20.7539	21.202	21.2299	20.295	20.5675	NaN	21.5242	20.5394	20.8095
Q3UTR7	Q3UTR7_MOUSE	Agt	Angiotensin 1-10		0.0119418	0.00682068	15	15	15	42.5	42.5	42.5	52.67	0	323.31	3226900000	701	27.0523	27.0921	27.0075	26.7903	26.2786	26.5866	26.965	27.0895	26.4981	27.0475
A2BIN1	A2BIN1_MOUSE	Mup10	Major urinary protein 10		0	NaN	4	4	4	27.2	27.2	27.2	20.681	0.0016978	7.4478	12611000	9	NaN	NaN	NaN	NaN	NaN	NaN	NaN	NaN	NaN	NaN
A8DUK4	A8DUK4_MOUSE	Hbb-bs	Beta-globin		0.470424	-0.943622	12	12	10	89.8	89.8	76.9	15.748	0	323.31	821290000	222	24.057	NaN	23.9097	21.2786	24.8573	25.4827	25.3044	22.8142	25.2069	23.538
B1ARV3	B1ARV3_MOUSE	Lao1	Amine oxidase		0.391922	0.379595	14	14	14	36.9	36.9	36.9	58.051	0	323.31	1009600000	301	23.9721	24.6016	25.2939	26.3086	24.2724	24.4376	24.7059	24.2901	24.276	24.8411
B8JJN0	B8JJN0_MOUSE	Gm20547	C3/C5 convertase		0.535878	-0.362497	15	15	15	14	14	14	142.32	0	50.296	585860000	172	22.3538	23.0075	23.2055	23.5465	22.547	23.1178	23.8156	23.858	22.635	23.0463
D3YVC0	D3YVC0_MOUSE	Gramd2	GRAM domain-containing 2 (Fragment)		0	NaN	1	1	1	10.2	10.2	10.2	27.439	0.009816	3.3939	145590000	15	NaN	NaN	NaN	NaN	NaN	NaN	NaN	NaN	NaN	NaN
D3Z494	D3Z494_MOUSE	Akr1b10	Aldo-keto reductase family 1, member B10 (aldose reductase)		0.354754	0.231408	3	3	1	14.9	14.9	6.6	32.745	0	42.845	53186000	26	23.458	NaN	NaN	NaN	23.6565	23.1038	NaN	NaN	23.5479	NaN
D3Z5G7	D3Z5G7_MOUSE	Ces1b	Carboxylic ester hydrolase		0.454631	-0.191422	15	6	6	28.2	16.4	16.4	62.196	0	115.44	106260000	37	22.9096	23.4777	23.1099	23.6694	23.0957	23.4481	23.68	23.6894	22.9497	23.4521
D3Z6I8	D3Z6I8_MOUSE	Tpm3	Tropomyosin alpha-3 chain		0.0490992	-0.0269306	7	7	7	27.1	27.1	27.1	28.723	0	51.727	113360000	44	21.5306	21.5331	21.7299	21.6547	21.5638	22.0427	NaN	NaN	21.6761	21.1693
E9PVD2	E9PVD2_MOUSE	Itih4	Inter alpha-trypsin inhibitor, heavy chain 4		0	NaN	24	1	1	36.6	2.2	2.2	104.59	0.0030628	5.6613	39788000	17	NaN	NaN	NaN	NaN	NaN	NaN	NaN	NaN	NaN	NaN
E9PX63	E9PX63_MOUSE	H2-Q1	Histocompatibility 2, Q region locus 1		0	NaN	3	1	1	11.1	4.1	4.1	38.616	0.01	3.5105	553410	1	NaN	NaN	NaN	NaN	NaN	NaN	NaN	NaN	NaN	NaN
E9PZF0	E9PZF0_MOUSE	Gm20390	Nucleoside diphosphate kinase		0.224735	-0.150241	14	14	5	76.8	76.8	25.1	30.2	0	323.31	6304100000	789	27.1285	26.4302	26.4256	26.24	27.1878	26.6462	26.672	26.3505	27.4274	27.0672
Q3TU36	Q3TU36_MOUSE	Rap1gds1	RAP1, GTP-GDP dissociation stimulator 1		0	NaN	4	4	4	9.4	9.4	9.4	66.005	0.0017513	8.3055	19044000	9	NaN	NaN	NaN	NaN	NaN	NaN	NaN	NaN	NaN	NaN
E9QN99	E9QN99_MOUSE	Abhd14b	Protein ABHD14B		1.12894	-0.472096	7	7	7	46.2	46.2	46.2	22.45	0	119.99	295030000	114	23.9463	23.1749	23.303	22.9894	23.6532	24.031	23.449	23.6498	24.3258	23.9716
G5E8R3	G5E8R3_MOUSE	Pcx	Pyruvate carboxylase		0.168303	0.376111	30	30	30	37.1	37.1	37.1	129.7	0	323.31	1075800000	294	25.2912	22.8301	23.3275	22.2883	24.1971	23.6843	23.4978	20.561	24.7054	23.6051
F7BAE9	F7BAE9_MOUSE	Trf	Transferrin (Fragment)		0	0.374836	23	2	2	80.6	13.3	13.3	30.473	0	323.31	36595000	20	NaN	21.9823	NaN	NaN	NaN	NaN	22.0264	NaN	NaN	21.1886
F7CVL0	F7CVL0_MOUSE	Dot1l	Histone-lysine N-methyltransferase, H3 lysine-79 specific (Fragment)		0.446204	0.497622	2	2	2	2.3	2.3	2.3	128.71	0.0041609	4.5436	989480000	27	NaN	26.2059	24.8217	NaN	25.3684	NaN	NaN	25.3327	24.4633	25.1073
G3UYJ7	G3UYJ7_MOUSE	Gm20441	Predicted gene 20441 (Fragment)		0.380794	-0.62005	6	6	2	30.2	30.2	6	28.523	0	75.66	54083000	33	21.8011	20.8994	NaN	NaN	22.3442	21.8258	NaN	NaN	23.3776	21.7015
G3X8T9	G3X8T9_MOUSE	Serpina3n	Serine protease inhibitor A3N		0.426429	-0.205472	14	12	2	39.2	35.6	6.7	46.766	0	323.31	912610000	234	23.9917	24.3762	24.5902	24.6784	23.8364	24.4733	24.7322	24.8412	24.0126	24.4411
V9GXA9	V9GXA9_MOUSE	Smim22	Small integral membrane protein 22		0	NaN	1	1	1	15.1	15.1	15.1	9.7303	0.0017065	7.5408	10106000	9	NaN	NaN	NaN	NaN	NaN	NaN	NaN	NaN	NaN	NaN
Q3UE92	Q3UE92_MOUSE	Xpnpep1	Xaa-Pro aminopeptidase 1		0	-0.114045	6	6	6	10.5	10.5	10.5	74.559	0.002004	12.254	24307000	13	NaN	NaN	NaN	NaN	21.543	NaN	NaN	NaN	21.9653	21.3488
Q3V117	Q3V117_MOUSE	Acly	ATP-citrate synthase		0.367797	0.232465	47	47	47	56.9	56.9	56.9	120.79	0	323.31	7993600000	1939	26.2838	25.7732	25.6754	25.6827	26.5359	25.7955	25.5949	25.1006	26.4363	25.8613
Q5SW46	Q5SW46_MOUSE	Lpo	Lactoperoxidase		0.056441	-0.0317497	13	13	13	22.7	22.7	22.7	80.123	0	83.215	243970000	83	23.2136	23.8507	24.05	24.1348	23.6699	23.6305	24.0025	24.1622	23.5473	23.7354
Q6S9I0	Q6S9I0_MOUSE	Kng2	Kininogen 2		0.0820025	-0.0624527	12	9	9	41.8	32.8	32.8	47.887	0	299.91	480430000	143	22.8273	23.557	23.2328	23.4748	22.8189	23.1863	23.656	23.7074	22.424	23.2493
Q6XLQ8	Q6XLQ8_MOUSE	Calu	Calumenin		0.548072	-0.339258	9	9	1	37.1	37.1	3.2	37.117	0	97.498	137960000	69	21.15	21.1125	20.9838	NaN	21.9723	21.4236	NaN	21.2678	22.033	21.8513
Q7M748	Q7M748_MOUSE	Wap	Whey acidic protein		1.04472	0.378426	8	8	3	73.1	73.1	26.1	14.422	0	323.31	1072700000000	8862	33.2353	33.9276	33.8237	33.6649	33.1292	33.1686	33.247	33.4995	32.7821	33.1915
Q8C845	Q8C845_MOUSE	Efhd2	EF-hand domain-containing protein D2		0.898392	-0.437391	7	7	7	27.9	27.9	27.9	26.8	0	131.57	218610000	49	22.7194	22.7271	22.6287	22.4867	23.227	23.0789	22.6063	NaN	23.7311	23.3644
Q8HWB2	Q8HWB2_MOUSE	H2-Q4	Histocompatibility 2, Q region locus 4		0	NaN	5	2	1	17.2	7.6	4	39.617	0.0018083	9.0657	3402800	4	NaN	NaN	NaN	NaN	NaN	NaN	NaN	NaN	NaN	NaN
Q8R5L1	Q8R5L1_MOUSE	C1qbp	Complement component 1 Q subcomponent-binding protein, mitochondrial		0	-0.116236	3	3	3	15.8	15.8	15.8	31.025	0	25.824	11804000	10	20.1586	NaN	NaN	NaN	NaN	NaN	NaN	NaN	20.2748	NaN
Q8VCU2	Q8VCU2_MOUSE	Gpld1	Glycosyl-phosphatidylinositol-specific phospholipase D		0.549242	-0.40333	10	10	10	17.2	17.2	17.2	93.622	0	48.438	86255000	61	20.904	22.3448	22.0925	22.1529	21.4334	21.9509	22.4668	22.7436	21.4514	22.3316
Q91VB8	Q91VB8_MOUSE	Hba-a1	Alpha globin 1		0.0984737	-0.205811	7	7	6	83.8	83.8	77.5	15.112	0	101.87	477780000	87	23.5085	NaN	NaN	NaN	24.6693	25.0581	25.1329	23.203	24.6857	23.3936
Q91VV1	Q91VV1_MOUSE	Csn1s1	Alpha-S1-casein		1.62839	0.904461	8	8	8	39.1	39.1	39.1	33.244	0	323.31	15684000000	1279	28.113	29.3717	29.1278	29.4693	28.1682	27.8881	28.2794	27.8946	27.5034	28.1622
Q924B0	Q924B0_MOUSE	Impa1	Inositol-1-monophosphatase		0.106865	0.266076	10	10	10	39.7	39.7	39.7	30.429	0	154.35	96970000	44	21.6878	20.2595	21.0255	NaN	23.3153	21.0777	NaN	NaN	22.4089	20.4314
Q9CPN9	Q9CPN9_MOUSE	2210010C04Rik	RIKEN cDNA 2210010C04 gene		0	NaN	2	2	2	21.1	21.1	21.1	26.422	0	20.531	126640000	33	NaN	NaN	NaN	NaN	NaN	NaN	NaN	NaN	NaN	NaN
Q9CQB8	Q9CQB8_MOUSE	Pate6	Prostate and testis-expressed 6		2.11425	-0.731793	2	2	2	16	16	16	12.189	0	323.31	310220000	85	22.7671	22.6411	22.6163	NaN	NaN	23.3811	23.3973	23.8196	22.9591	23.4762
Q9EQR4	Q9EQR4_MOUSE	Clca3a2	Chloride channel accessory 3A2		1.88454	1.92646	22	22	22	38	38	38	99.855	0	323.31	860650000	334	25.4382	25.6876	25.5791	24.8999	24.9369	24.6482	23.7176	21.6456	NaN	23.5161
Q9R0T7	Q9R0T7_MOUSE	Try4	Pancreatic trypsin		0	NaN	1	1	1	8.1	8.1	8.1	26.274	0.0015504	5.7899	42698000	23	NaN	NaN	NaN	NaN	NaN	NaN	NaN	NaN	NaN	NaN
Q9Z1A1	Q9Z1A1_MOUSE	Tfg	TFG protein		0	NaN	2	2	2	6.8	6.8	6.8	43.02	0	42.707	17703000	13	NaN	NaN	NaN	NaN	NaN	NaN	NaN	NaN	NaN	NaN
Q9Z1R9	Q9Z1R9_MOUSE	Prss1	Protease, serine 1 (trypsin 1)		0	NaN	1	1	1	8.1	8.1	8.1	26.134	0.0097087	3.3295	7905200000	6	NaN	NaN	NaN	NaN	NaN	NaN	NaN	NaN	NaN	NaN

## Sheet: Tab 2 Imputed Data
Accession	ID	Gene Name	Descriptions	Significant	.=-LOG(P-value)	Difference	Majority protein IDs	Peptides	Razor + unique peptides	Unique peptides	Sequence coverage [%]	Unique + razor sequence coverage [%]	Unique sequence coverage [%]	Mol. weight [kDa]	Q-value	Score	Intensity	MS/MS count	117 KO	171 KO	156 KO	166 KO	157 KO	199 WT	158 WT	193 WT	196 WT	197 WT	Accession	ID	Gene Name	Descriptions
O88668	CREG1_MOUSE	Creg1	Protein CREG1	+	3.37483	2.09616	sp|O88668|CREG1_MOUSE;tr|J3QP41|J3QP41_MOUSE	3	3	3	14.5	14.5	14.5	24.452	0.0016447	6.9856	22346000	22	22.7908	22.5437	22.0402	22.3604	21.8955	19.6096	19.7081	20.553	21.3522	19.9268	O88668	CREG1_MOUSE	Creg1	Protein CREG1
O89023	TPP1_MOUSE	Tpp1	Tripeptidyl-peptidase 1	+	2.43014	2.35469	sp|O89023|TPP1_MOUSE	3	3	3	11.9	11.9	11.9	61.341	0.0020492	13.543	39981000	17	23.0149	23.4371	20.952	22.7779	22.9506	20.078	19.556	20.0309	21.7879	19.9062	O89023	TPP1_MOUSE	Tpp1	Tripeptidyl-peptidase 1
P01631	KV2A7_MOUSE		Ig kappa chain V-II region 26-10	+	4.95737	-3.74237	sp|P01631|KV2A7_MOUSE;tr|A0A140T8M0|A0A140T8M0_MOUSE;tr|A0A0B4J1I0|A0A0B4J1I0_MOUSE;tr|A0A075B5K8|A0A075B5K8_MOUSE;tr|F6XWB2|F6XWB2_MOUSE;tr|A0A140T8N1|A0A140T8N1_MOUSE;tr|A0A140T8M9|A0A140T8M9_MOUSE;tr|A0A075B5N0|A0A075B5N0_MOUSE;tr|A0A0G2JDE5|A0A0G2JDE5_MOUSE	2	2	2	17.7	17.7	17.7	12.273	0	92.241	145110000	61	19.7173	19.7949	21.0169	19.3423	20.1625	23.6617	23.4451	23.8438	23.111	24.6842	P01631	KV2A7_MOUSE		Ig kappa chain V-II region 26-10
P02664	CS2LB_MOUSE	Csn1s2b	Alpha-S2-casein-like B	+	5.52742	3.97901	sp|P02664|CS2LB_MOUSE;tr|Q3TP31|Q3TP31_MOUSE	6	6	0	65.7	65.7	0	16.911	0	323.31	12712000000	561	30.1353	31.7908	30.973	31.5347	30.7101	27.3497	27.3355	27.0886	26.3582	27.1168	P02664	CS2LB_MOUSE	Csn1s2b	Alpha-S2-casein-like B
P04117	FABP4_MOUSE	Fabp4	Fatty acid-binding protein, adipocyte	+	6.03573	5.23384	sp|P04117|FABP4_MOUSE	3	3	3	17.4	17.4	17.4	14.65	0.001692	7.3757	859640000	48	25.654	25.2505	25.828	24.6671	25.6063	21.2318	19.8564	20.1743	19.2028	20.3712	P04117	FABP4_MOUSE	Fabp4	Fatty acid-binding protein, adipocyte
P06330	HVM51_MOUSE		Ig heavy chain V region AC38 205.12	+	1.98508	-3.57344	sp|P06330|HVM51_MOUSE;tr|A0A075B5V6|A0A075B5V6_MOUSE;tr|A0A075B5V1|A0A075B5V1_MOUSE;tr|A0A075B5V0|A0A075B5V0_MOUSE;sp|P01757|HVM13_MOUSE;sp|P01756|HVM12_MOUSE	4	4	4	40.7	40.7	40.7	12.934	0	180.01	298040000	65	19.635	19.6373	18.2362	22.3709	19.714	24.9737	24.5479	23.3195	20.3326	24.2869	P06330	HVM51_MOUSE		Ig heavy chain V region AC38 205.12
P06797	CATL1_MOUSE	Ctsl	Procathepsin L	+	4.09002	1.26895	sp|P06797|CATL1_MOUSE;tr|A0A1Y7VNM3|A0A1Y7VNM3_MOUSE;tr|A0A1Y7VNQ4|A0A1Y7VNQ4_MOUSE	11	11	11	31.1	31.1	31.1	37.547	0	323.31	671290000	164	24.5221	24.4691	24.8679	24.1156	24.1825	23.1711	23.2828	23.4608	22.8034	23.0944	P06797	CATL1_MOUSE	Ctsl	Procathepsin L
D6RGQ0	D6RGQ0_MOUSE	Cfh	Complement factor H	+	2.74129	-1.90988	tr|D6RGQ0|D6RGQ0_MOUSE;sp|P06909|CFAH_MOUSE;tr|E9Q8I0|E9Q8I0_MOUSE;tr|E9Q8H9|E9Q8H9_MOUSE;tr|A0A0A6YWP4|A0A0A6YWP4_MOUSE	5	5	5	7.5	7.5	7.5	125.05	0.0019802	11.868	26641000	21	20.0293	19.8406	19.0058	18.5092	20.5104	21.3339	21.2128	21.9701	20.9439	21.9841	D6RGQ0	D6RGQ0_MOUSE	Cfh	Complement factor H
A0A0G2JF04	A0A0G2JF04_MOUSE	Csn2	Beta-casein	+	4.11741	1.99569	tr|A0A0G2JF04|A0A0G2JF04_MOUSE;tr|A0A0G2JE86|A0A0G2JE86_MOUSE;tr|Q8BGL0|Q8BGL0_MOUSE;sp|P10598|CASB_MOUSE	3	3	3	14	14	14	23.636	0	323.31	15433000000	1251	28.5268	29.3318	28.7553	29.0745	28.241	26.8948	27.3929	26.602	26.2438	26.8174	A0A0G2JF04	A0A0G2JF04_MOUSE	Csn2	Beta-casein
P10605	CATB_MOUSE	Ctsb	Cathepsin B	+	3.37649	0.959124	sp|P10605|CATB_MOUSE	15	15	15	48.4	48.4	48.4	37.279	0	323.31	3990900000	732	26.4845	26.6283	26.9109	26.3729	26.4076	25.9833	25.7462	25.6844	25.3337	25.2609	P10605	CATB_MOUSE	Ctsb	Cathepsin B
P10639	THIO_MOUSE	Txn	Thioredoxin	+	3.11582	-0.724865	sp|P10639|THIO_MOUSE	4	4	4	46.7	46.7	46.7	11.675	0	323.31	780970000	176	24.693	24.1771	24.3742	24.1963	24.712	25.0014	25.0221	25.13	25.4083	25.215	P10639	THIO_MOUSE	Txn	Thioredoxin
P10923	OSTP_MOUSE	Spp1	Osteopontin	+	2.58394	5.05281	sp|P10923|OSTP_MOUSE;tr|F8WIP8|F8WIP8_MOUSE	7	7	7	37.8	37.8	37.8	32.459	0	323.31	899810000	121	23.0564	25.042	26.5295	29.1917	25.7705	23.0197	20.4847	20.7718	20.8329	19.2169	P10923	OSTP_MOUSE	Spp1	Osteopontin
P16675	PPGB_MOUSE	Ctsa	Lysosomal protective protein	+	6.10615	4.38664	sp|P16675|PPGB_MOUSE;tr|G3X8T3|G3X8T3_MOUSE	3	3	3	6.3	6.3	6.3	53.844	0	63.673	262520000	39	24.2324	24.6139	24.5023	24.2604	23.8168	20.9477	19.4084	19.8506	19.9615	19.3244	P16675	PPGB_MOUSE	Ctsa	Lysosomal protective protein
F8WIR1	F8WIR1_MOUSE	Ctsd	Cathepsin D	+	2.59355	3.65678	tr|F8WIR1|F8WIR1_MOUSE;sp|P18242|CATD_MOUSE;tr|F6Y6L6|F6Y6L6_MOUSE	13	13	13	45.8	45.8	45.8	44.215	0	323.31	963220000	152	25.269	25.4996	25.0255	24.6973	25.0167	23.4832	22.9037	20.2824	21.6217	18.9332	F8WIR1	F8WIR1_MOUSE	Ctsd	Cathepsin D
P29788	VTNC_MOUSE	Vtn	Vitronectin	+	2.75978	1.11003	sp|P29788|VTNC_MOUSE	5	5	5	15.3	15.3	15.3	54.848	0	53.367	107460000	56	22.6343	23.547	23.4907	23.142	22.8955	21.8629	22.3257	22.3919	21.4774	22.1016	P29788	VTNC_MOUSE	Vtn	Vitronectin
P70158	ASM3A_MOUSE	Smpdl3a	Acid sphingomyelinase-like phosphodiesterase 3a	+	2.02787	2.9947	sp|P70158|ASM3A_MOUSE	8	8	8	23.8	23.8	23.8	49.857	0	65.897	170900000	59	24.0683	24.3698	23.8332	23.2957	23.3477	18.9322	22.9113	19.472	22.8024	19.8232	P70158	ASM3A_MOUSE	Smpdl3a	Acid sphingomyelinase-like phosphodiesterase 3a
P97821	CATC_MOUSE	Ctsc	Dipeptidyl peptidase 1	+	2.67313	3.20194	sp|P97821|CATC_MOUSE;tr|D3Z220|D3Z220_MOUSE	6	6	6	19.9	19.9	19.9	52.376	0	235.97	182880000	56	23.8935	23.5868	24.4877	22.8153	23.4763	19.1551	22.9123	20.4238	20.3502	19.4084	P97821	CATC_MOUSE	Ctsc	Dipeptidyl peptidase 1
E9PZ00	E9PZ00_MOUSE	Psap	Prosaposin	+	3.66488	3.02099	tr|E9PZ00|E9PZ00_MOUSE;tr|Q8BFQ1|Q8BFQ1_MOUSE;tr|K3W4L3|K3W4L3_MOUSE;tr|J3QPG5|J3QPG5_MOUSE;sp|Q61207|SAP_MOUSE	4	4	4	10.2	10.2	10.2	60.672	0.0018349	9.4647	140890000	33	23.4823	23.9406	22.9038	23.3781	23.0533	19.4282	21.494	20.5896	20.9299	19.2114	E9PZ00	E9PZ00_MOUSE	Psap	Prosaposin
Q9WV54	ASAH1_MOUSE	Asah1	Acid ceramidase	+	3.22384	3.06177	sp|Q9WV54|ASAH1_MOUSE	9	9	9	30.7	30.7	30.7	44.669	0	66.567	81860000	53	22.8709	23.1795	23.2565	22.3586	23.0088	19.2079	20.5879	19.1816	21.6315	18.7565	Q9WV54	ASAH1_MOUSE	Asah1	Acid ceramidase
Q9Z0J0	NPC2_MOUSE	Npc2	NPC intracellular cholesterol transporter 2	+	3.66538	2.68835	sp|Q9Z0J0|NPC2_MOUSE	4	4	4	30.9	30.9	30.9	16.442	0.0019455	11.333	146470000	30	22.6132	23.0898	22.9232	22.4559	22.4941	18.6243	20.2491	19.763	20.9976	20.5004	Q9Z0J0	NPC2_MOUSE	Npc2	NPC intracellular cholesterol transporter 2
Q9Z0M5	LICH_MOUSE	Lipa	Lysosomal acid lipase/cholesteryl ester hydrolase	+	2.20768	2.63253	sp|Q9Z0M5|LICH_MOUSE	7	7	7	28.2	28.2	28.2	45.325	0	36.778	262500000	82	23.9715	24.0017	24.391	23.736	23.2463	22.7558	22.6094	19.3115	21.5124	19.9949	Q9Z0M5	LICH_MOUSE	Lipa	Lysosomal acid lipase/cholesteryl ester hydrolase
Q9Z2M7	PMM2_MOUSE	Pmm2	Phosphomannomutase 2	+	2.34488	1.88311	sp|Q9Z2M7|PMM2_MOUSE	6	6	6	23.1	23.1	23.1	27.656	0	23.118	93617000	30	21.991	21.7039	21.8364	21.7197	22.2498	21.8981	19.5944	19.6488	19.4468	19.4972	Q9Z2M7	PMM2_MOUSE	Pmm2	Phosphomannomutase 2
A0A0A6YXW6	A0A0A6YXW6_MOUSE	Igha	Immunoglobulin heavy constant alpha (Fragment)	+	3.23949	-1.26599	tr|A0A0A6YXW6|A0A0A6YXW6_MOUSE;tr|A0A075B6A3|A0A075B6A3_MOUSE;sp|P01878|IGHA_MOUSE	13	13	13	59.1	59.1	59.1	41.958	0	323.31	5230500000	687	27.0057	27.3171	26.5256	26.6968	26.7621	27.9633	28.3254	28.126	27.5562	28.6663	A0A0A6YXW6	A0A0A6YXW6_MOUSE	Igha	Immunoglobulin heavy constant alpha (Fragment)
Q91XL1	Q91XL1_MOUSE	Lrg1	Leucine-rich HEV glycoprotein	+	2.86507	1.24077	tr|Q91XL1|Q91XL1_MOUSE	4	4	4	15.8	15.8	15.8	37.431	0	323.31	767790000	220	25.8924	26.1921	26.5444	25.9823	25.925	25.2741	24.6357	25.3929	24.1262	24.9033	Q91XL1	Q91XL1_MOUSE	Lrg1	Leucine-rich HEV glycoprotein
Q9EQR4	Q9EQR4_MOUSE	Clca3a2	Chloride channel accessory 3A2	+	2.0826	2.37313	tr|Q9EQR4|Q9EQR4_MOUSE;sp|Q9QX15|CA3A1_MOUSE	22	22	22	38	38	38	99.855	0	323.31	860650000	334	25.4382	25.6876	25.5791	24.8999	24.9369	24.6482	23.7176	21.6456	21.1485	23.5161	Q9EQR4	Q9EQR4_MOUSE	Clca3a2	Chloride channel accessory 3A2
A6X935	ITIH4_MOUSE	Itih4	Inter alpha-trypsin inhibitor, heavy chain 4		0.183262	-0.135183	sp|A6X935|ITIH4_MOUSE;tr|E9Q5L2|E9Q5L2_MOUSE	24	24	1	36.6	36.6	2.3	104.66	0	323.31	1950300000	572	26.14	26.7257	26.8474	27.1452	26.4148	26.9016	27.1755	27.2364	25.9344	26.7012	A6X935	ITIH4_MOUSE	Itih4	Inter alpha-trypsin inhibitor, heavy chain 4
C0HKG6	RNT2B_MOUSE	Rnaset2b	Ribonuclease T2-B		1.19934	0.478578	sp|C0HKG6|RNT2B_MOUSE;sp|C0HKG5|RNT2A_MOUSE;tr|A0A338P7E3|A0A338P7E3_MOUSE;tr|A0A338P711|A0A338P711_MOUSE	6	6	6	33.6	33.6	33.6	29.608	0	21.401	345980000	77	25.5498	25.8782	26.0032	25.3626	25.0231	24.9176	24.8266	25.5627	24.924	25.1931	C0HKG6	RNT2B_MOUSE	Rnaset2b	Ribonuclease T2-B
E9PV24	FIBA_MOUSE	Fga	Fibrinogen alpha chain		0.151822	0.258172	sp|E9PV24|FIBA_MOUSE	16	16	16	22.7	22.7	22.7	87.428	0	323.31	1475500000	311	24.0256	24.9936	25.3189	25.4122	23.9476	24.9968	25.5735	25.5424	22.6366	23.6575	E9PV24	FIBA_MOUSE	Fga	Fibrinogen alpha chain
D3YTY9	D3YTY9_MOUSE	Kng1	Kininogen-1		0.00442922	0.00337067	tr|D3YTY9|D3YTY9_MOUSE;tr|A0A0R4J038|A0A0R4J038_MOUSE;sp|O08677|KNG1_MOUSE	19	19	16	43.8	43.8	35.6	53.204	0	323.31	16649000000	1788	27.5032	28.0716	28.2695	28.1135	27.4215	27.7469	27.9908	28.3963	27.2352	27.9932	D3YTY9	D3YTY9_MOUSE	Kng1	Kininogen-1
Q6GT24	Q6GT24_MOUSE	Prdx6	Peroxiredoxin-6		0.306721	-0.186094	tr|Q6GT24|Q6GT24_MOUSE;sp|O08709|PRDX6_MOUSE;tr|D3Z0Y2|D3Z0Y2_MOUSE	15	15	15	69.2	69.2	69.2	24.826	0	323.31	901660000	302	24.8756	24.1563	24.2487	24.0403	24.7978	24.5467	24.3037	24.1423	25.2353	24.8211	Q6GT24	Q6GT24_MOUSE	Prdx6	Peroxiredoxin-6
O08749	DLDH_MOUSE	Dld	Dihydrolipoyl dehydrogenase, mitochondrial		0.00982981	-0.024073	sp|O08749|DLDH_MOUSE	5	5	5	12.4	12.4	12.4	54.272	0.0020833	14.422	77347000	29	23.2265	22.1995	22.4006	19.7736	22.9786	22.7121	22.5697	19.982	23.1916	22.2437	O08749	DLDH_MOUSE	Dld	Dihydrolipoyl dehydrogenase, mitochondrial
O08807	PRDX4_MOUSE	Prdx4	Peroxiredoxin-4		0.689126	-0.209103	sp|O08807|PRDX4_MOUSE;tr|B1AZS9|B1AZS9_MOUSE	10	9	9	42.3	42.3	42.3	31.052	0	238.23	666800000	156	24.5135	24.7996	24.7678	24.3153	25.0684	24.7816	25.049	24.6987	25.1181	24.8627	O08807	PRDX4_MOUSE	Prdx4	Peroxiredoxin-4
O08997	ATOX1_MOUSE	Atox1	Copper transport protein ATOX1		1.10745	-0.380427	sp|O08997|ATOX1_MOUSE	5	5	5	73.5	73.5	73.5	7.3384	0	98.395	291460000	106	22.6916	22.2482	22.3433	22.4921	22.9813	23.1103	22.9443	22.5446	23.3171	22.7423	O08997	ATOX1_MOUSE	Atox1	Copper transport protein ATOX1
O09131	GSTO1_MOUSE	Gsto1	Glutathione S-transferase omega-1		0.152624	0.668062	sp|O09131|GSTO1_MOUSE;tr|A0A494BAB1|A0A494BAB1_MOUSE;tr|A0A494B9X6|A0A494B9X6_MOUSE	7	7	7	24.2	24.2	24.2	27.497	0	128.2	304940000	53	25.1797	23.5392	19.3609	23.4343	23.9701	18.9831	24.308	19.1652	25.2519	24.4357	O09131	GSTO1_MOUSE	Gsto1	Glutathione S-transferase omega-1
A0A1B0GX27	A0A1B0GX27_MOUSE	Bcat2	Branched-chain-amino-acid aminotransferase		0.200347	-0.495827	tr|A0A1B0GX27|A0A1B0GX27_MOUSE;sp|O35855|BCAT2_MOUSE;tr|O88374|O88374_MOUSE	8	8	8	29.1	29.1	29.1	43.493	0	53.36	124410000	57	23.4869	22.0907	19.6333	19.9916	23.1279	22.5136	22.7197	19.8702	23.3259	22.3803	A0A1B0GX27	A0A1B0GX27_MOUSE	Bcat2	Branched-chain-amino-acid aminotransferase
O55137	ACOT1_MOUSE	Acot1	Acyl-coenzyme A thioesterase 1		0.152414	-0.242505	sp|O55137|ACOT1_MOUSE;sp|Q9QYR9|ACOT2_MOUSE	9	9	9	28.2	28.2	28.2	46.135	0	50.053	133980000	57	21.667	21.7568	20.6296	21.0574	22.1246	21.7602	19.7105	21.5329	22.925	22.5193	O55137	ACOT1_MOUSE	Acot1	Acyl-coenzyme A thioesterase 1
O70251	EF1B_MOUSE	Eef1b	Elongation factor 1-beta		0.845811	0.826031	sp|O70251|EF1B_MOUSE;tr|A0A087WS46|A0A087WS46_MOUSE	8	8	6	52	52	46.7	24.693	0	323.31	259370000	106	22.4182	22.2888	22.198	22.3532	23.1783	21.8702	21.7481	19.854	22.6161	22.2179	O70251	EF1B_MOUSE	Eef1b	Elongation factor 1-beta
O70570	PIGR_MOUSE	Pigr	Polymeric immunoglobulin receptor		1.07142	0.458876	sp|O70570|PIGR_MOUSE	22	22	22	29.7	29.7	29.7	84.998	0	323.31	9105800000	1067	27.5858	27.7705	27.557	27.5626	26.9317	26.5858	26.8564	26.9987	26.9724	27.7	O70570	PIGR_MOUSE	Pigr	Polymeric immunoglobulin receptor
O88322	NID2_MOUSE	Nid2	Nidogen-2		0.497027	-1.13324	sp|O88322|NID2_MOUSE;tr|A0A286YCQ5|A0A286YCQ5_MOUSE	9	9	9	10.9	10.9	10.9	153.91	0	44.385	77967000	55	22.696	19.3584	23.3024	23.5271	19.8096	23.64	24.1069	22.9716	20.7237	22.9175	O88322	NID2_MOUSE	Nid2	Nidogen-2
O88342	WDR1_MOUSE	Wdr1	WD repeat-containing protein 1		0.661878	-0.518703	sp|O88342|WDR1_MOUSE;tr|A0A0J9YU05|A0A0J9YU05_MOUSE	12	12	12	39.6	39.6	39.6	66.406	0	188.25	481010000	141	23.4453	22.7844	21.7778	22.4995	23.5362	23.5464	22.9418	22.769	23.9577	23.4219	O88342	WDR1_MOUSE	Wdr1	WD repeat-containing protein 1
O88531	PPT1_MOUSE	Ppt1	Palmitoyl-protein thioesterase 1		1.4567	1.55761	sp|O88531|PPT1_MOUSE;tr|B1B0P8|B1B0P8_MOUSE;tr|B1B0P9|B1B0P9_MOUSE	4	4	4	19.3	19.3	19.3	34.49	0	40.776	46061000	32	20.5856	22.0025	22.2709	21.926	21.631	19.3659	19.4524	21.6197	21.228	18.9619	O88531	PPT1_MOUSE	Ppt1	Palmitoyl-protein thioesterase 1
O88968	TCO2_MOUSE	Tcn2	Transcobalamin-2		0.40731	-0.190351	sp|O88968|TCO2_MOUSE	15	15	15	47.9	47.9	47.9	47.585	0	323.31	2050100000	485	26.5309	26.1619	26.6006	26.4188	25.8101	26.3624	26.9492	26.5422	26.017	26.6034	O88968	TCO2_MOUSE	Tcn2	Transcobalamin-2
O89020	AFAM_MOUSE	Afm	Afamin		0.479062	-0.286165	sp|O89020|AFAM_MOUSE	10	10	10	20.4	20.4	20.4	69.378	0	316.69	1654800000	368	24.7461	25.2173	25.181	25.0132	24.1467	24.9111	25.2421	25.7832	24.6103	25.1884	O89020	AFAM_MOUSE	Afm	Afamin
P00687	AMY1_MOUSE	Amy1	Alpha-amylase 1		0.303937	0.156197	sp|P00687|AMY1_MOUSE;tr|D3YYQ5|D3YYQ5_MOUSE	6	6	4	19.2	19.2	13.5	57.643	0	197.73	73366000	45	22.3858	23.0319	22.7046	23.1438	22.2563	22.367	22.6367	23.029	22.2743	22.4344	P00687	AMY1_MOUSE	Amy1	Alpha-amylase 1
P00920	CAH2_MOUSE	Ca2	Carbonic anhydrase 2		0.105914	-0.296591	sp|P00920|CAH2_MOUSE	8	8	8	56.9	56.9	56.9	29.032	0	64.568	148960000	63	23.4532	22.7133	23.669	19.5099	23.5023	23.3846	23.2828	20.1309	23.8626	23.6699	P00920	CAH2_MOUSE	Ca2	Carbonic anhydrase 2
P01027	CO3_MOUSE	C3	Complement C3		0.21705	-0.146147	sp|P01027|CO3_MOUSE	79	79	79	53.9	53.9	53.9	186.48	0	323.31	18795000000	3662	26.0456	26.8492	26.9925	27.1054	26.2836	26.8627	26.9012	27.2316	26.1518	26.8598	P01027	CO3_MOUSE	C3	Complement C3
P01029	CO4B_MOUSE	C4b	Complement C4-B		1.02672	0.416213	sp|P01029|CO4B_MOUSE	27	27	27	23.5	23.5	23.5	192.91	0	323.31	777040000	274	25.2768	25.3234	25.6263	25.7079	25.2634	25.0561	25.4029	25.2443	24.2664	25.147	P01029	CO4B_MOUSE	C4b	Complement C4-B
P01132	EGF_MOUSE	Egf	Pro-epidermal growth factor		0.979369	-0.436873	sp|P01132|EGF_MOUSE	10	10	10	11.2	11.2	11.2	133.07	0	45.977	337620000	110	24.4383	24.231	24.7776	24.4959	23.8993	24.5576	25.2376	25.1043	24.2033	24.9237	P01132	EGF_MOUSE	Egf	Pro-epidermal growth factor
P01837	IGKC_MOUSE	Igkc	Immunoglobulin kappa constant		1.62858	-0.688802	sp|P01837|IGKC_MOUSE;tr|A0A5H1ZRK8|A0A5H1ZRK8_MOUSE	4	4	4	63.6	63.6	63.6	11.934	0	323.31	781160000	158	23.9842	24.2023	23.9241	24.3322	23.5053	24.5269	25.0703	24.8063	23.9671	25.0214	P01837	IGKC_MOUSE	Igkc	Immunoglobulin kappa constant
P01843	LAC1_MOUSE		Ig lambda-1 chain C region		0.659515	-1.11773	sp|P01843|LAC1_MOUSE;tr|A0A0G2JE99|A0A0G2JE99_MOUSE	4	4	4	64.8	64.8	64.8	11.575	0	267.34	159260000	58	21.6784	20.1429	19.6578	21.9391	21.8496	23.2843	19.989	22.6843	21.2161	23.6827	P01843	LAC1_MOUSE		Ig lambda-1 chain C region
P01887	B2MG_MOUSE	B2m	Beta-2-microglobulin		0.123756	-0.361317	sp|P01887|B2MG_MOUSE	3	3	3	40.3	40.3	40.3	13.779	0	62.213	184990000	136	22.2846	23.9855	20.8237	23.7761	19.0572	20.1188	22.9066	23.6786	22.305	22.7245	P01887	B2MG_MOUSE	B2m	Beta-2-microglobulin
P01898	HA10_MOUSE	H2-Q10	H-2 class I histocompatibility antigen, Q10 alpha chain		0.042453	-0.0288441	sp|P01898|HA10_MOUSE	13	13	9	50.8	50.8	36.9	37.251	0	100.09	615390000	162	24.1451	25.2071	24.8456	24.6668	24.0954	24.6847	24.6189	24.8965	24.2178	24.6863	P01898	HA10_MOUSE	H2-Q10	H-2 class I histocompatibility antigen, Q10 alpha chain
P03953	CFAD_MOUSE	Cfd	Complement factor D		0.0270858	0.0212257	sp|P03953|CFAD_MOUSE	7	7	7	39.4	39.4	39.4	28.057	0	311.69	1411300000	234	25.3893	25.9481	25.265	25.5796	24.5013	25.1481	25.1946	25.341	25.0898	25.8035	P03953	CFAD_MOUSE	Cfd	Complement factor D
P03958	ADA_MOUSE	Ada	Adenosine deaminase		0.193854	-0.175421	sp|P03958|ADA_MOUSE	4	4	4	16.5	16.5	16.5	39.991	0	22.109	37274000	20	20.2549	19.4432	19.9055	19.6675	20.4011	19.9929	19.2212	19.849	20.3575	21.1288	P03958	ADA_MOUSE	Ada	Adenosine deaminase
P05063	ALDOC_MOUSE	Aldoc	Fructose-bisphosphate aldolase C		0.2949	0.165268	sp|P05063|ALDOC_MOUSE	28	28	25	84.3	84.3	74.7	39.394	0	323.31	3539300000	836	26.3267	26.0678	25.4897	25.957	26.2786	25.7668	25.5016	25.4898	26.4654	26.0698	P05063	ALDOC_MOUSE	Aldoc	Fructose-bisphosphate aldolase C
P05064	ALDOA_MOUSE	Aldoa	Fructose-bisphosphate aldolase A		0.393238	-0.21867	sp|P05064|ALDOA_MOUSE;tr|A6ZI44|A6ZI44_MOUSE;tr|D3Z510|D3Z510_MOUSE;tr|A0A0U1RPN8|A0A0U1RPN8_MOUSE;tr|Q9CPQ9|Q9CPQ9_MOUSE;tr|A6ZI46|A6ZI46_MOUSE	17	14	5	66.2	56.6	22.3	39.355	0	323.31	737970000	238	24.7077	24.1349	23.9248	24.2151	24.9612	24.5208	24.3598	24.257	25.1352	24.7642	P05064	ALDOA_MOUSE	Aldoa	Fructose-bisphosphate aldolase A
P05201	AATC_MOUSE	Got1	Aspartate aminotransferase, cytoplasmic		0.0586585	-0.192112	sp|P05201|AATC_MOUSE;tr|F7ALS6|F7ALS6_MOUSE	12	12	12	42.9	42.9	42.9	46.247	0	163.84	108370000	57	22.959	22.0852	20.5791	18.0104	22.8909	22.2631	20.7124	19.1252	23.1701	22.2143	P05201	AATC_MOUSE	Got1	Aspartate aminotransferase, cytoplasmic
P05202	AATM_MOUSE	Got2	Aspartate aminotransferase, mitochondrial		0.296333	-0.326511	sp|P05202|AATM_MOUSE	9	9	9	26.3	26.3	26.3	47.411	0	323.31	304250000	105	24.9176	23.7378	23.2295	23.2056	24.7519	24.5121	23.9066	23.8954	25.3453	23.8155	P05202	AATM_MOUSE	Got2	Aspartate aminotransferase, mitochondrial
P05213	TBA1B_MOUSE	Tuba1b	Tubulin alpha-1B chain		0.219298	0.282456	sp|P05213|TBA1B_MOUSE;tr|A0A2R8VHF3|A0A2R8VHF3_MOUSE	12	12	0	40.4	40.4	0	50.151	0	323.31	373680000	205	24.2768	23.4656	23.3408	23.4466	23.2911	24.3849	23.7061	21.5991	23.8906	22.8279	P05213	TBA1B_MOUSE	Tuba1b	Tubulin alpha-1B chain
P06151	LDHA_MOUSE	Ldha	L-lactate dehydrogenase A chain		0.0709411	0.0427132	sp|P06151|LDHA_MOUSE;tr|A0A1B0GSX0|A0A1B0GSX0_MOUSE;tr|A0A1B0GSR9|A0A1B0GSR9_MOUSE;tr|D3YZQ9|D3YZQ9_MOUSE	23	23	22	69.6	69.6	66	36.498	0	323.31	10238000000	1190	28.2299	28.076	27.8618	27.6915	28.554	28.1641	27.899	27.5343	28.4937	28.1085	P06151	LDHA_MOUSE	Ldha	L-lactate dehydrogenase A chain
P06728	APOA4_MOUSE	Apoa4	Apolipoprotein A-IV		0.16995	0.108778	sp|P06728|APOA4_MOUSE	22	22	22	68.9	68.9	68.9	45.029	0	323.31	33648000000	3087	28.29	28.6625	28.7854	28.8161	27.8021	28.061	28.6127	28.8051	27.9442	28.3892	P06728	APOA4_MOUSE	Apoa4	Apolipoprotein A-IV
P06745	G6PI_MOUSE	Gpi	Glucose-6-phosphate isomerase		0.373475	-0.956201	sp|P06745|G6PI_MOUSE	13	13	13	37.6	37.6	37.6	62.766	0	323.31	308540000	128	24.3	24.0138	18.8124	23.7834	24.8444	24.3421	23.7827	23.2242	24.8195	24.3666	P06745	G6PI_MOUSE	Gpi	Glucose-6-phosphate isomerase
P06796	CASK_MOUSE	Csn3	Kappa-casein		0.193548	-0.10825	sp|P06796|CASK_MOUSE	8	8	8	34.3	34.3	34.3	20.03	0	323.31	56018000000	2341	31.5717	31.8833	31.4519	31.1391	31.0996	31.4487	30.9496	31.9574	31.7435	31.5875	P06796	CASK_MOUSE	Csn3	Kappa-casein
P06801	MAOX_MOUSE	Me1	NADP-dependent malic enzyme		0.38347	-0.201897	sp|P06801|MAOX_MOUSE;tr|Q3TQP6|Q3TQP6_MOUSE	29	29	29	69.1	69.1	69.1	63.953	0	323.31	9151400000	1755	27.4349	26.8545	26.8589	26.7406	27.5556	27.3386	27.106	26.8124	27.7917	27.4053	P06801	MAOX_MOUSE	Me1	NADP-dependent malic enzyme
P07141	CSF1_MOUSE	Csf1	Macrophage colony-stimulating factor 1		0.680387	1.71392	sp|P07141|CSF1_MOUSE;tr|D3Z090|D3Z090_MOUSE;tr|F6RNW8|F6RNW8_MOUSE	4	4	4	9.4	9.4	9.4	60.648	0.0019763	11.863	104560000	49	23.2901	23.8471	22.932	18.3189	23.5513	23.3851	20.4092	19.6238	20.6017	19.35	P07141	CSF1_MOUSE	Csf1	Macrophage colony-stimulating factor 1
Q5NCU4	Q5NCU4_MOUSE	Sparc	Osteonectin		0.552321	-0.439425	tr|Q5NCU4|Q5NCU4_MOUSE;sp|P07214|SPRC_MOUSE;tr|A0A1L1SSH9|A0A1L1SSH9_MOUSE	5	5	5	25.2	25.2	25.2	34.322	0	20.541	64005000	33	21.0435	21.0059	19.5882	21.0206	20.1748	21.1188	21.473	21.4588	20.1942	20.7852	Q5NCU4	Q5NCU4_MOUSE	Sparc	Osteonectin
P07309	TTHY_MOUSE	Ttr	Transthyretin		0.19683	0.752657	sp|P07309|TTHY_MOUSE	10	10	10	73.5	73.5	73.5	15.776	0	323.31	1047700000	184	27.8438	24.6022	21.4179	21.5378	25.6526	23.935	20.1912	23.0581	25.353	24.7537	P07309	TTHY_MOUSE	Ttr	Transthyretin
P07724	ALBU_MOUSE	Alb	Albumin		0.220426	-0.12065	sp|P07724|ALBU_MOUSE	63	63	60	74.2	74.2	73.4	68.692	0	323.31	1554400000000	38500	32.6727	33.2392	33.2243	33.1767	32.4739	33.0056	33.2457	33.4418	32.53	33.167	P07724	ALBU_MOUSE	Alb	Albumin
A0A0A0MQA3	A0A0A0MQA3_MOUSE	Serpina1a	Alpha-1-antitrypsin 1-1		0.680928	1.55849	tr|A0A0A0MQA3|A0A0A0MQA3_MOUSE;sp|P07758|A1AT1_MOUSE	20	2	2	54.1	11.9	11.9	48.795	0	84.141	196730000	62	23.9954	25.4506	25.0652	24.143	24.2493	20.1374	24.0561	25.3755	20.6187	24.9234	A0A0A0MQA3	A0A0A0MQA3_MOUSE	Serpina1a	Alpha-1-antitrypsin 1-1
P07901	HS90A_MOUSE	Hsp90aa1	Heat shock protein HSP 90-alpha		0.072588	-0.0464977	sp|P07901|HS90A_MOUSE	27	16	16	35.7	22	22	84.787	0	323.31	981610000	289	24.6787	24.5352	24.3602	24.3103	24.8831	24.8199	24.2045	24.0416	25.1518	24.7822	P07901	HS90A_MOUSE	Hsp90aa1	Heat shock protein HSP 90-alpha
P08030	APT_MOUSE	Aprt	Adenine phosphoribosyltransferase		0.180753	0.4207	sp|P08030|APT_MOUSE;tr|A0A1D5RLR6|A0A1D5RLR6_MOUSE	3	3	3	20	20	20	19.724	0.0016863	7.2943	34487000	21	22.2092	20.1904	19.5438	22.0541	22.4401	21.9345	18.925	19.3996	22.2663	21.8087	P08030	APT_MOUSE	Aprt	Adenine phosphoribosyltransferase
P08071	TRFL_MOUSE	Ltf	Lactotransferrin		1.92227	1.79103	sp|P08071|TRFL_MOUSE	37	37	37	62.1	62.1	62.1	77.837	0	323.31	1989300000	442	23.8846	24.7056	25.6381	26.4108	24.8048	24.3922	23.4684	22.2998	22.8964	23.432	P08071	TRFL_MOUSE	Ltf	Lactotransferrin
P08113	ENPL_MOUSE	Hsp90b1	Endoplasmin		0.576236	-0.317724	sp|P08113|ENPL_MOUSE;tr|F7C312|F7C312_MOUSE	13	11	11	20.6	18.8	18.8	92.475	0	323.31	268180000	114	23.8389	23.2323	22.7353	22.781	23.8517	23.4448	23.5373	23.3558	23.7641	23.9258	P08113	ENPL_MOUSE	Hsp90b1	Endoplasmin
P08226	APOE_MOUSE	Apoe	Apolipoprotein E		0.753217	-0.313444	sp|P08226|APOE_MOUSE;tr|A0A1B0GX15|A0A1B0GX15_MOUSE;tr|G3UWN5|G3UWN5_MOUSE;tr|G3UZM8|G3UZM8_MOUSE	9	9	9	30.9	30.9	30.9	35.866	0	323.31	634580000	246	22.9308	23.1416	23.5901	23.0557	22.9146	23.2132	23.4086	24.0586	23.0468	23.473	P08226	APOE_MOUSE	Apoe	Apolipoprotein E
P08228	SODC_MOUSE	Sod1	Superoxide dismutase [Cu-Zn]		0.141307	-0.109432	sp|P08228|SODC_MOUSE	10	10	10	56.5	56.5	56.5	15.942	0	323.31	4576700000	484	28.4119	27.7889	27.5577	27.4892	28.2944	28.3054	27.495	27.4731	28.6245	28.1914	P08228	SODC_MOUSE	Sod1	Superoxide dismutase [Cu-Zn]
P08249	MDHM_MOUSE	Mdh2	Malate dehydrogenase, mitochondrial		0.0334647	-0.0331718	sp|P08249|MDHM_MOUSE	13	13	13	52.7	52.7	52.7	35.611	0	323.31	753610000	253	25.3795	23.9212	24.27	23.8237	24.4409	24.6931	24.5416	23.8069	24.916	24.0435	P08249	MDHM_MOUSE	Mdh2	Malate dehydrogenase, mitochondrial
P09103	PDIA1_MOUSE	P4hb	Protein disulfide-isomerase		0.93034	-0.526269	sp|P09103|PDIA1_MOUSE	26	26	26	50.1	50.1	50.1	57.058	0	323.31	2684900000	659	25.343	24.483	24.2834	24.4243	25.4788	25.002	25.2493	25.0046	25.8525	25.5353	P09103	PDIA1_MOUSE	P4hb	Protein disulfide-isomerase
P09411	PGK1_MOUSE	Pgk1	Phosphoglycerate kinase 1		0.769674	-0.437307	sp|P09411|PGK1_MOUSE	19	19	19	64.5	64.5	64.5	44.55	0	323.31	4652300000	744	26.8452	25.9217	25.7426	25.9261	26.8153	26.9083	26.7314	26.0868	27.0421	26.6688	P09411	PGK1_MOUSE	Pgk1	Phosphoglycerate kinase 1
P09470	ACE_MOUSE	Ace	Angiotensin-converting enzyme		0.581461	0.383924	sp|P09470|ACE_MOUSE;tr|F6QCP8|F6QCP8_MOUSE	10	10	10	10.5	10.5	10.5	150.92	0	21.46	65858000	55	21.728	22.006	21.5216	21.1188	21.2041	21.2514	20.1597	21.851	21.2052	21.1916	P09470	ACE_MOUSE	Ace	Angiotensin-converting enzyme
P09813	APOA2_MOUSE	Apoa2	Apolipoprotein A-II		0.0337073	0.0921696	sp|P09813|APOA2_MOUSE	1	1	1	9.8	9.8	9.8	11.309	0	130.27	192550000	68	22.4886	22.4261	22.2161	24.2174	19.4135	21.1925	20.3932	23.492	22.6878	22.5353	P09813	APOA2_MOUSE	Apoa2	Apolipoprotein A-II
A0A0A6YW67	A0A0A6YW67_MOUSE	Gm8797	Predicted pseudogene 8797		0.0446798	-0.109398	tr|A0A0A6YW67|A0A0A6YW67_MOUSE;tr|E9Q9J0|E9Q9J0_MOUSE;sp|P62984|RL40_MOUSE;sp|P62983|RS27A_MOUSE;tr|E9Q4P0|E9Q4P0_MOUSE;tr|E9Q5F6|E9Q5F6_MOUSE;tr|E9QNP0|E9QNP0_MOUSE;tr|Q5SX22|Q5SX22_MOUSE;sp|P0CG49|UBB_MOUSE;sp|P0CG50|UBC_MOUSE	2	2	2	32.5	32.5	32.5	8.7279	0	320.42	175330000	56	20.9209	23.314	22.7633	23.1691	24.0948	23.4404	20.2899	23.3813	24.1462	23.5515	A0A0A6YW67	A0A0A6YW67_MOUSE	Gm8797	Predicted pseudogene 8797
P0DP28	CALM3_MOUSE	Calm3	Calmodulin-3		1.64786	1.93372	sp|P0DP28|CALM3_MOUSE;sp|P0DP27|CALM2_MOUSE;sp|P0DP26|CALM1_MOUSE;sp|Q9D6P8|CALL3_MOUSE	4	4	4	28.2	28.2	28.2	16.837	0	323.31	161140000	39	22.4398	22.712	22.2225	22.2003	22.4204	19.1403	20.8468	21.3086	22.3343	18.6965	P0DP28	CALM3_MOUSE	Calm3	Calmodulin-3
P10126	EF1A1_MOUSE	Eef1a1	Elongation factor 1-alpha 1		0.253327	-0.154185	sp|P10126|EF1A1_MOUSE;tr|D3YZ68|D3YZ68_MOUSE;sp|P62631|EF1A2_MOUSE	15	15	15	51.7	51.7	51.7	50.113	0	323.31	9354200000	1111	27.8102	27.4048	27.2482	27.2381	28.266	27.9853	27.5691	27.2775	28.1752	27.7312	P10126	EF1A1_MOUSE	Eef1a1	Elongation factor 1-alpha 1
P10404	ENV1_MOUSE		MLV-related proviral Env polyprotein		0.229803	-0.238232	sp|P10404|ENV1_MOUSE	10	10	10	17.2	17.2	17.2	69.612	0	323.31	2237300000	384	25.653	26.2342	26.4426	25.6434	25.404	26.4797	26.9336	26.4624	24.7528	25.9399	P10404	ENV1_MOUSE		MLV-related proviral Env polyprotein
P10810	CD14_MOUSE	Cd14	Monocyte differentiation antigen CD14		2.22835	1.47461	sp|P10810|CD14_MOUSE	11	11	11	40.7	40.7	40.7	39.203	0	323.31	505680000	128	25.449	25.4982	25.34	24.351	24.1868	24.4767	23.3794	23.5326	22.8071	23.2562	P10810	CD14_MOUSE	Cd14	Monocyte differentiation antigen CD14
P11152	LIPL_MOUSE	Lpl	Lipoprotein lipase		2.28001	1.33744	sp|P11152|LIPL_MOUSE	10	10	10	31.4	31.4	31.4	53.109	0	323.31	1194500000	296	25.2711	25.7797	25.7429	25.7653	24.6232	24.3336	24.8021	24.1772	23.1442	24.038	P11152	LIPL_MOUSE	Lpl	Lipoprotein lipase
B7ZNJ1	B7ZNJ1_MOUSE	Fn1	Fibronectin		0.347858	-0.462901	tr|B7ZNJ1|B7ZNJ1_MOUSE;tr|A0A087WS56|A0A087WS56_MOUSE;tr|B9EHT6|B9EHT6_MOUSE;tr|A0A087WSN6|A0A087WSN6_MOUSE;tr|Q3UHL6|Q3UHL6_MOUSE;tr|A0A087WR50|A0A087WR50_MOUSE;sp|P11276|FINC_MOUSE	10	10	10	7.4	7.4	7.4	239.72	0	45.616	54916000	44	20.5433	22.3871	19.4051	21.5468	21.2375	21.0262	21.917	22.1977	20.6001	21.6933	B7ZNJ1	B7ZNJ1_MOUSE	Fn1	Fibronectin
P11352	GPX1_MOUSE	Gpx1	Glutathione peroxidase 1		0.555827	-0.777866	sp|P11352|GPX1_MOUSE;tr|A0A0A6YVV2|A0A0A6YVV2_MOUSE;tr|A0A0A6YY34|A0A0A6YY34_MOUSE	13	13	13	70.1	70.1	70.1	22.329	0	293.56	418890000	194	24.8232	24.0358	21.4496	23.8311	24.9367	24.7208	24.2576	24.2557	25.4255	24.3062	P11352	GPX1_MOUSE	Gpx1	Glutathione peroxidase 1
P11404	FABPH_MOUSE	Fabp3	Fatty acid-binding protein, heart		0.0113759	-0.00573921	sp|P11404|FABPH_MOUSE	10	10	10	66.9	66.9	66.9	14.819	0	323.31	102800000000	3946	32.0314	31.5522	31.7033	31.7218	32.4894	31.9972	31.8076	31.9495	31.9653	31.8073	P11404	FABPH_MOUSE	Fabp3	Fatty acid-binding protein, heart
D3Z2T9	D3Z2T9_MOUSE	Cdk1	Cyclin-dependent kinase 1 (Fragment)		0.250138	-0.151976	tr|D3Z2T9|D3Z2T9_MOUSE;sp|P11440|CDK1_MOUSE	1	1	1	4.5	4.5	4.5	22.893	0.0022026	17.221	6989400000	149	27.3828	26.7068	26.5976	27.071	26.9345	26.8982	26.4382	27.5868	27.0311	27.4982	D3Z2T9	D3Z2T9_MOUSE	Cdk1	Cyclin-dependent kinase 1 (Fragment)
P11499	HS90B_MOUSE	Hsp90ab1	Heat shock protein HSP 90-beta		0.32373	-0.165419	sp|P11499|HS90B_MOUSE	31	31	18	45.7	45.7	29.8	83.28	0	323.31	5977000000	1178	26.3233	26.0245	25.6892	25.7016	26.4379	26.2668	25.8109	25.8707	26.6192	26.4359	P11499	HS90B_MOUSE	Hsp90ab1	Heat shock protein HSP 90-beta
P11672	NGAL_MOUSE	Lcn2	Neutrophil gelatinase-associated lipocalin		2.32761	0.822507	sp|P11672|NGAL_MOUSE;tr|A0A0A6YW77|A0A0A6YW77_MOUSE	11	11	11	40	40	40	22.875	0	323.31	5699100000	1131	27.8714	28.3872	28.864	28.0673	28.0111	27.7012	27.4056	27.3908	27.0122	27.5786	P11672	NGAL_MOUSE	Lcn2	Neutrophil gelatinase-associated lipocalin
P12032	TIMP1_MOUSE	Timp1	Metalloproteinase inhibitor 1		0.22828	-0.353274	sp|P12032|TIMP1_MOUSE	2	2	2	12.2	12.2	12.2	22.628	0.002907	5.0078	55118000	23	19.17	19.95	21.9012	21.7051	21.6284	21.2721	22.0572	21.7097	20.6788	20.4034	P12032	TIMP1_MOUSE	Timp1	Metalloproteinase inhibitor 1
P12382	PFKAL_MOUSE	Pfkl	ATP-dependent 6-phosphofructokinase, liver type		0.118724	0.0902699	sp|P12382|PFKAL_MOUSE	13	13	13	21.5	21.5	21.5	85.359	0	68.11	182710000	112	23.4194	22.6557	22.7583	22.5188	23.3629	23.1722	23.067	22.0216	23.1738	22.8291	P12382	PFKAL_MOUSE	Pfkl	ATP-dependent 6-phosphofructokinase, liver type
P13020	GELS_MOUSE	Gsn	Gelsolin		0.324328	-0.133702	sp|P13020|GELS_MOUSE;tr|A0A0J9YUQ8|A0A0J9YUQ8_MOUSE	15	15	10	29	29	19.9	85.941	0	323.31	2103800000	365	25.0535	25.3458	25.5078	25.645	24.8322	25.3596	25.6259	25.5965	25.0822	25.3886	P13020	GELS_MOUSE	Gsn	Gelsolin
P13707	GPDA_MOUSE	Gpd1	Glycerol-3-phosphate dehydrogenase [NAD(+)], cytoplasmic		0.193733	-0.144758	sp|P13707|GPDA_MOUSE;tr|E0CXN5|E0CXN5_MOUSE	14	14	13	59.3	59.3	56.2	37.572	0	323.31	1514100000	368	25.0223	23.9412	23.9959	24.1864	24.8786	24.6969	24.4088	23.9128	25.082	24.6477	P13707	GPDA_MOUSE	Gpd1	Glycerol-3-phosphate dehydrogenase [NAD(+)], cytoplasmic
P14152	MDHC_MOUSE	Mdh1	Malate dehydrogenase, cytoplasmic		0.073512	-0.0433521	sp|P14152|MDHC_MOUSE;tr|A0A5F8MPN8|A0A5F8MPN8_MOUSE	8	8	8	29.9	29.9	29.9	36.511	0	323.31	4740600000	846	26.6638	26.2643	25.8652	26.2225	26.4664	26.5177	26.1458	25.8952	26.8733	26.267	P14152	MDHC_MOUSE	Mdh1	Malate dehydrogenase, cytoplasmic
P14211	CALR_MOUSE	Calr	Calreticulin		0.581466	-0.476699	sp|P14211|CALR_MOUSE	9	9	9	34.9	34.9	34.9	47.994	0	147.72	625460000	160	23.4654	22.7318	22.6088	22.1578	24.0551	23.1447	22.8993	23.5447	24.0495	23.7641	P14211	CALR_MOUSE	Calr	Calreticulin
P15535	B4GT1_MOUSE	B4galt1	Beta-1,4-galactosyltransferase 1		1.68093	-0.502919	sp|P15535|B4GT1_MOUSE;tr|B1AXY5|B1AXY5_MOUSE	8	8	8	26.1	26.1	26.1	44.411	0	323.31	609680000	228	25.1376	25.1017	25.1819	24.5967	25.3484	25.098	25.7023	25.6942	25.76	25.6265	P15535	B4GT1_MOUSE	B4galt1	Beta-1,4-galactosyltransferase 1
P16125	LDHB_MOUSE	Ldhb	L-lactate dehydrogenase B chain		0.37006	0.529779	sp|P16125|LDHB_MOUSE;tr|A0A6I8MX27|A0A6I8MX27_MOUSE;tr|D3Z7F0|D3Z7F0_MOUSE	8	7	7	28.4	24.9	24.9	36.572	0	53.337	86569000	39	22.4227	21.5025	21.753	22.1259	22.5508	22.3215	20.4492	19.9126	23.1755	21.8471	P16125	LDHB_MOUSE	Ldhb	L-lactate dehydrogenase B chain
P16858	G3P_MOUSE	Gapdh	Glyceraldehyde-3-phosphate dehydrogenase		0.147319	0.108162	sp|P16858|G3P_MOUSE;tr|A0A0A0MQF6|A0A0A0MQF6_MOUSE;tr|S4R257|S4R257_MOUSE;tr|S4R1W1|S4R1W1_MOUSE;tr|A0A1D5RLD8|A0A1D5RLD8_MOUSE	17	17	15	55.9	55.9	51.7	35.81	0	323.31	9094700000	1253	27.8209	27.3493	27.2447	27.2309	28.3487	27.7371	27.2285	26.9949	28.0309	27.4623	P16858	G3P_MOUSE	Gapdh	Glyceraldehyde-3-phosphate dehydrogenase
P17182	ENOA_MOUSE	Eno1	Alpha-enolase		0.200562	-0.106351	sp|P17182|ENOA_MOUSE;tr|Q6PHC1|Q6PHC1_MOUSE	24	24	24	69.4	69.4	69.4	47.14	0	323.31	9289100000	1333	27.1293	26.5886	26.4554	26.4627	27.1613	26.7502	26.6176	26.6668	27.3941	26.9002	P17182	ENOA_MOUSE	Eno1	Alpha-enolase
P17563	SBP1_MOUSE	Selenbp1	Methanethiol oxidase		0.280737	-0.647018	sp|P17563|SBP1_MOUSE;sp|Q63836|SBP2_MOUSE;tr|A0A0R4J135|A0A0R4J135_MOUSE;tr|G3UYY2|G3UYY2_MOUSE	7	7	7	22.5	22.5	22.5	52.513	0	24.018	57153000	28	22.8571	19.6611	19.7966	20.4988	22.9689	22.7378	20.2811	20.2167	23.0991	22.6828	P17563	SBP1_MOUSE	Selenbp1	Methanethiol oxidase
P17742	PPIA_MOUSE	Ppia	Peptidyl-prolyl cis-trans isomerase A		1.37603	-0.377019	sp|P17742|PPIA_MOUSE;tr|A0A1L1SST0|A0A1L1SST0_MOUSE	8	8	8	61.6	61.6	61.6	17.971	0	323.31	4172400000	765	26.7862	26.4314	26.3997	26.4575	27.0536	27.12	26.843	26.7516	27.2372	27.0616	P17742	PPIA_MOUSE	Ppia	Peptidyl-prolyl cis-trans isomerase A
P17751	TPIS_MOUSE	Tpi1	Triosephosphate isomerase		0.100805	-0.0648045	sp|P17751|TPIS_MOUSE;tr|H7BXC3|H7BXC3_MOUSE	10	10	10	51	51	51	26.712	0	323.31	1906800000	513	25.3001	24.8895	24.8567	24.9083	25.4649	25.3307	24.6477	24.7177	25.7185	25.3289	P17751	TPIS_MOUSE	Tpi1	Triosephosphate isomerase
P18760	COF1_MOUSE	Cfl1	Cofilin-1		0.123985	0.0514759	sp|P18760|COF1_MOUSE;tr|F8WGL3|F8WGL3_MOUSE;tr|A0A494B9A7|A0A494B9A7_MOUSE	7	7	7	48.8	48.8	48.8	18.559	0	262.51	328400000	113	23.1384	22.8775	22.7158	22.6988	23.4165	23.171	22.9845	22.7051	22.8625	22.8666	P18760	COF1_MOUSE	Cfl1	Cofilin-1
P19096	FAS_MOUSE	Fasn	Fatty acid synthase		0.008148	0.00764656	sp|P19096|FAS_MOUSE;tr|A0A0U1RNJ1|A0A0U1RNJ1_MOUSE	120	120	120	66.3	66.3	66.3	272.43	0	323.31	79739000000	9517	29.2068	28.9033	28.6153	28.6051	29.809	28.9931	28.6634	28.4743	29.7672	29.2032	P19096	FAS_MOUSE	Fasn	Fatty acid synthase
P19157	GSTP1_MOUSE	Gstp1	Glutathione S-transferase P 1		2.44637	-0.75856	sp|P19157|GSTP1_MOUSE;tr|A0A494B908|A0A494B908_MOUSE;tr|A0A494BAW2|A0A494BAW2_MOUSE;sp|P46425|GSTP2_MOUSE	7	7	7	48.1	48.1	48.1	23.609	0	323.31	466840000	151	23.99	24.4884	24.1127	24.291	24.9655	25.2322	24.8775	25.0809	25.3093	25.1404	P19157	GSTP1_MOUSE	Gstp1	Glutathione S-transferase P 1
H7BX99	H7BX99_MOUSE	F2	Prothrombin		0.174979	-0.153887	tr|H7BX99|H7BX99_MOUSE;sp|P19221|THRB_MOUSE	18	18	18	36.5	36.5	36.5	70.211	0	323.31	1016100000	253	24.4985	25.3025	25.2491	25.4934	24.21	25.1514	25.5937	25.4142	24.2125	25.1513	H7BX99	H7BX99_MOUSE	F2	Prothrombin
P20029	BIP_MOUSE	Hspa5	Endoplasmic reticulum chaperone BiP		0.78109	-0.24186	sp|P20029|BIP_MOUSE	22	20	20	40.2	36	36	72.421	0	323.31	1862500000	498	24.9815	24.7408	24.7827	24.506	25.3872	24.9851	25.1855	24.982	25.2552	25.1997	P20029	BIP_MOUSE	Hspa5	Endoplasmic reticulum chaperone BiP
P20918	PLMN_MOUSE	Plg	Plasminogen		0.036623	-0.0389133	sp|P20918|PLMN_MOUSE	20	20	20	35.1	35.1	35.1	90.807	0	323.31	1169200000	343	24.7019	25.2158	25.3978	25.509	24.1144	24.6916	25.7026	25.398	24.1902	25.1512	P20918	PLMN_MOUSE	Plg	Plasminogen
P21460	CYTC_MOUSE	Cst3	Cystatin-C		0.13309	0.0842892	sp|P21460|CYTC_MOUSE;tr|A2APX3|A2APX3_MOUSE	8	8	8	49.3	49.3	49.3	15.531	0	323.31	2641200000	533	25.5506	25.7665	26.1894	26.2001	25.1987	25.4575	25.9598	25.9846	25.2464	25.8355	P21460	CYTC_MOUSE	Cst3	Cystatin-C
P21614	VTDB_MOUSE	Gc	Vitamin D-binding protein		0.152447	-0.10425	sp|P21614|VTDB_MOUSE	22	22	22	50.8	50.8	50.8	53.6	0	323.31	9386500000	1616	26.6116	27.3948	27.0851	27.307	26.3898	26.8281	27.346	27.4906	26.5096	27.1351	P21614	VTDB_MOUSE	Gc	Vitamin D-binding protein
P21956	MFGM_MOUSE	Mfge8	Lactadherin		0.059733	0.0484898	sp|P21956|MFGM_MOUSE	18	18	18	41.7	41.7	41.7	51.24	0	323.31	8558400000	1134	27.4505	28.2059	28.5655	28.3399	27.6857	27.8633	28.6466	28.1737	27.4134	27.908	P21956	MFGM_MOUSE	Mfge8	Lactadherin
P22599	A1AT2_MOUSE	Serpina1b	Alpha-1-antitrypsin 1-2		0.206465	0.122842	sp|P22599|A1AT2_MOUSE	21	10	10	52.8	25.7	25.7	45.974	0	323.31	10371000000	909	27.0398	27.9808	27.3543	27.5415	27.408	27.0885	27.4037	27.9146	26.8284	27.475	P22599	A1AT2_MOUSE	Serpina1b	Alpha-1-antitrypsin 1-2
Q543K9	Q543K9_MOUSE	Pnp	Purine nucleoside phosphorylase		0.427034	0.64071	tr|Q543K9|Q543K9_MOUSE;sp|P23492|PNPH_MOUSE;tr|A0A2I3BQH2|A0A2I3BQH2_MOUSE;tr|Q9D8C9|Q9D8C9_MOUSE	8	8	8	35.6	35.6	35.6	32.263	0	31.373	139150000	61	22.8262	22.2059	22.1534	21.7747	22.9671	22.5455	19.2416	21.8152	22.6833	22.4381	Q543K9	Q543K9_MOUSE	Pnp	Purine nucleoside phosphorylase
P23591	FCL_MOUSE	Gfus	GDP-L-fucose synthase		0.127894	-0.14249	sp|P23591|FCL_MOUSE;tr|A0A2R8W6P6|A0A2R8W6P6_MOUSE;tr|A0A2R8VI39|A0A2R8VI39_MOUSE;tr|A0A2R8VHD0|A0A2R8VHD0_MOUSE	13	13	13	61.1	61.1	61.1	35.877	0	118.19	226190000	109	23.2268	22.3573	22.2987	22.345	23.3426	23.1178	22.2896	21.8545	23.8542	23.1666	P23591	FCL_MOUSE	Gfus	GDP-L-fucose synthase
P23953	EST1C_MOUSE	Ces1c	Carboxylesterase 1C		0.161156	-0.0873013	sp|P23953|EST1C_MOUSE	24	24	15	50.7	50.7	38.8	61.055	0	323.31	12991000000	2033	27.7319	28.1671	28.1802	28.3265	27.6149	28.0732	28.1643	28.4731	27.5147	28.232	P23953	EST1C_MOUSE	Ces1c	Carboxylesterase 1C
P24369	PPIB_MOUSE	Ppib	Peptidyl-prolyl cis-trans isomerase B		0.0366865	0.0588486	sp|P24369|PPIB_MOUSE	3	3	3	17.1	17.1	17.1	23.713	0.0017889	8.9547	20632000	18	19.9222	19.97	20.4235	20.656	19.4455	19.3242	21.3134	20.7936	20.2769	18.4147	P24369	PPIB_MOUSE	Ppib	Peptidyl-prolyl cis-trans isomerase B
P24527	LKHA4_MOUSE	Lta4h	Leukotriene A-4 hydrolase		0.170557	-0.306185	sp|P24527|LKHA4_MOUSE	11	11	11	26	26	26	69.05	0	302.59	91163000	66	22.4419	20.8487	22.2068	21.2346	22.8541	22.8033	21.6872	20.1995	23.6573	22.7697	P24527	LKHA4_MOUSE	Lta4h	Leukotriene A-4 hydrolase
P26262	KLKB1_MOUSE	Klkb1	Plasma kallikrein		1.0183	-1.57607	sp|P26262|KLKB1_MOUSE	5	5	5	11.8	11.8	11.8	71.382	0.0019342	11.275	74887000	29	20.0343	22.8939	18.7283	22.5064	22.1991	22.3491	23.0809	23.4531	22.3549	23.0043	P26262	KLKB1_MOUSE	Klkb1	Plasma kallikrein
P26638	SYSC_MOUSE	Sars1	Serine--tRNA ligase, cytoplasmic		0.0280699	0.0182251	sp|P26638|SYSC_MOUSE;tr|Q8C483|Q8C483_MOUSE;tr|A2AFS0|A2AFS0_MOUSE	14	14	14	35.5	35.5	35.5	58.388	0	170.32	452790000	148	23.3877	22.8722	22.7074	22.5511	23.3381	23.1575	22.8598	22.4623	23.3484	22.9374	P26638	SYSC_MOUSE	Sars1	Serine--tRNA ligase, cytoplasmic
P26883	FKB1A_MOUSE	Fkbp1a	Peptidyl-prolyl cis-trans isomerase FKBP1A		0.399746	0.383433	sp|P26883|FKB1A_MOUSE	3	3	3	40.7	40.7	40.7	11.922	0	48.712	86679000	36	21.9332	21.6472	21.5254	21.6852	21.1874	22.0703	20.1718	20.2512	21.8127	21.7552	P26883	FKB1A_MOUSE	Fkbp1a	Peptidyl-prolyl cis-trans isomerase FKBP1A
P27773	PDIA3_MOUSE	Pdia3	Protein disulfide-isomerase A3		0.413401	-0.387455	sp|P27773|PDIA3_MOUSE	14	14	14	37	37	37	56.678	0	91.195	212920000	72	22.9244	22.3428	22.0935	21.2857	23.4311	22.4143	22.6547	22.36	23.4452	23.1405	P27773	PDIA3_MOUSE	Pdia3	Protein disulfide-isomerase A3
P28271	ACOC_MOUSE	Aco1	Cytoplasmic aconitate hydratase		0.454518	-0.171026	sp|P28271|ACOC_MOUSE	21	21	21	33.5	33.5	33.5	98.124	0	323.31	551190000	209	25.0332	24.7873	24.7794	24.7673	25.4128	25.1982	25.222	24.7511	25.466	24.9978	P28271	ACOC_MOUSE	Aco1	Cytoplasmic aconitate hydratase
P28474	ADHX_MOUSE	Adh5	Alcohol dehydrogenase class-3		0.0946524	0.182327	sp|P28474|ADHX_MOUSE	5	5	5	27.3	27.3	27.3	39.547	0	235.6	94148000	42	22.5404	21.5923	21.2426	20.5143	22.2334	22.1053	19.4127	20.6468	22.5487	22.4979	P28474	ADHX_MOUSE	Adh5	Alcohol dehydrogenase class-3
P28665	MUG1_MOUSE	Mug1	Murinoglobulin-1		0.21293	-0.172871	sp|P28665|MUG1_MOUSE	30	30	30	31.5	31.5	31.5	165.3	0	323.31	1857900000	512	25.1943	26.302	25.9737	26.2653	25.1872	25.982	25.9988	26.6296	25.2842	25.8922	P28665	MUG1_MOUSE	Mug1	Murinoglobulin-1
P29341	PABP1_MOUSE	Pabpc1	Polyadenylate-binding protein 1		0.539034	-1.29607	sp|P29341|PABP1_MOUSE;tr|Q9D4E6|Q9D4E6_MOUSE	9	9	9	17.9	17.9	17.9	70.67	0.0022422	18.757	95790000	32	22.8736	19.3863	19.9758	18.7211	23.2949	23.3909	20.8951	20.2561	23.2664	22.9235	P29341	PABP1_MOUSE	Pabpc1	Polyadenylate-binding protein 1
P29699	FETUA_MOUSE	Ahsg	Alpha-2-HS-glycoprotein		0.256369	-0.174858	sp|P29699|FETUA_MOUSE;tr|A0A338P703|A0A338P703_MOUSE;tr|A0A338P7G1|A0A338P7G1_MOUSE;tr|A0A338P7H5|A0A338P7H5_MOUSE	6	6	6	30.7	30.7	30.7	37.325	0	323.31	17056000000	1399	27.5745	28.2748	28.0324	28.2999	27.2719	27.9432	28.3731	28.5579	27.4067	28.0468	P29699	FETUA_MOUSE	Ahsg	Alpha-2-HS-glycoprotein
P29752	LALBA_MOUSE	Lalba	Alpha-lactalbumin		0.42795	-0.221082	sp|P29752|LALBA_MOUSE	5	5	5	22.4	22.4	22.4	16.26	0	323.31	14769000000	1598	27.5731	28.1016	28.1215	27.9992	27.3424	27.6453	28.2458	28.4372	27.6118	28.3032	P29752	LALBA_MOUSE	Lalba	Alpha-lactalbumin
P30416	FKBP4_MOUSE	Fkbp4	Peptidyl-prolyl cis-trans isomerase FKBP4		0.849036	-0.374287	sp|P30416|FKBP4_MOUSE;tr|F6S2D5|F6S2D5_MOUSE;tr|F7CAT1|F7CAT1_MOUSE	15	15	15	37.3	37.3	37.3	51.572	0	212.19	436310000	186	23.0923	22.5143	22.3262	22.3379	22.9961	22.9902	22.5505	22.9075	23.5354	23.1546	P30416	FKBP4_MOUSE	Fkbp4	Peptidyl-prolyl cis-trans isomerase FKBP4
P31786	ACBP_MOUSE	Dbi	Acyl-CoA-binding protein		1.97413	-0.552486	sp|P31786|ACBP_MOUSE;tr|Q4VWZ5|Q4VWZ5_MOUSE;tr|D3Z563|D3Z563_MOUSE	3	3	3	41.4	41.4	41.4	10	0	323.31	2976100000	279	26.5836	25.9075	26.243	25.7937	25.7421	26.7418	26.4783	26.6554	26.6622	26.4947	P31786	ACBP_MOUSE	Dbi	Acyl-CoA-binding protein
P32261	ANT3_MOUSE	Serpinc1	Antithrombin-III		0.167697	-0.116717	sp|P32261|ANT3_MOUSE	21	21	21	50.1	50.1	50.1	52.003	0	323.31	10134000000	1259	27.1335	27.6055	27.8885	27.612	26.8653	27.4006	28.0075	27.8784	26.868	27.5339	P32261	ANT3_MOUSE	Serpinc1	Antithrombin-III
P33622	APOC3_MOUSE	Apoc3	Apolipoprotein C-III		1.43073	1.50748	sp|P33622|APOC3_MOUSE;tr|A0A0R4J1N3|A0A0R4J1N3_MOUSE;tr|E9QP56|E9QP56_MOUSE	2	2	2	27.3	27.3	27.3	10.982	0.0020367	13.23	85262000	32	22.1119	19.767	22.3749	23.1836	22.6458	20.396	20.1253	20.8119	20.7803	20.4322	P33622	APOC3_MOUSE	Apoc3	Apolipoprotein C-III
P34884	MIF_MOUSE	Mif	Macrophage migration inhibitory factor		0.817582	-0.86659	sp|P34884|MIF_MOUSE	3	3	3	35.7	35.7	35.7	12.504	0	20.679	128960000	78	23.4082	23.4308	21.1725	23.3914	24.2539	23.9638	23.6358	23.8083	24.6951	23.8868	P34884	MIF_MOUSE	Mif	Macrophage migration inhibitory factor
P35293	RAB18_MOUSE	Rab18	Ras-related protein Rab-18		0.406689	0.356538	sp|P35293|RAB18_MOUSE;tr|A0A3Q4EI12|A0A3Q4EI12_MOUSE;tr|A0A452J8C1|A0A452J8C1_MOUSE	8	8	8	44.2	44.2	44.2	23.035	0	73.275	98677000	46	21.745	22.081	22.1238	22.1439	22.0285	22.0578	22.241	20.1431	22.0847	21.8129	P35293	RAB18_MOUSE	Rab18	Ras-related protein Rab-18
P35505	FAAA_MOUSE	Fah	Fumarylacetoacetase		0.0443417	-0.038763	sp|P35505|FAAA_MOUSE	15	15	15	60.6	60.6	60.6	46.175	0	323.31	1140100000	375	25.8114	25.4821	24.8842	24.8563	26.0008	25.5395	25.3029	24.8487	26.0881	25.4495	P35505	FAAA_MOUSE	Fah	Fumarylacetoacetase
P35700	PRDX1_MOUSE	Prdx1	Peroxiredoxin-1		0.0386164	-0.0310776	sp|P35700|PRDX1_MOUSE;tr|B1AXW5|B1AXW5_MOUSE;tr|B1AXW6|B1AXW6_MOUSE;tr|B1AXW4|B1AXW4_MOUSE	14	14	13	62.8	62.8	62.8	22.176	0	323.31	3375800000	551	26.4576	25.7891	26.2713	26.0582	26.9196	26.5511	26.0806	25.7265	26.95	26.3429	P35700	PRDX1_MOUSE	Prdx1	Peroxiredoxin-1
P35846	FOLR1_MOUSE	Folr1	Folate receptor alpha		0.00259453	-0.00207481	sp|P35846|FOLR1_MOUSE;tr|E9PYD9|E9PYD9_MOUSE;tr|E9Q543|E9Q543_MOUSE;tr|E9PXL5|E9PXL5_MOUSE;tr|E9PXB5|E9PXB5_MOUSE	7	7	7	25.9	25.9	25.9	29.449	0	62.806	1306800000	118	24.6449	25.1437	25.1946	24.8113	24.6959	25.0054	25.3103	25.2757	23.9681	24.9413	P35846	FOLR1_MOUSE	Folr1	Folate receptor alpha
P38647	GRP75_MOUSE	Hspa9	Stress-70 protein, mitochondrial		0.0550276	-0.101801	sp|P38647|GRP75_MOUSE	10	10	10	20	20	20	73.46	0	63.843	106200000	49	22.1031	19.9074	20.7336	19.3923	21.9758	21.3143	20.2882	19.809	21.8143	21.3956	P38647	GRP75_MOUSE	Hspa9	Stress-70 protein, mitochondrial
P40142	TKT_MOUSE	Tkt	Transketolase		0.109028	-0.0667225	sp|P40142|TKT_MOUSE;tr|A0A286YE28|A0A286YE28_MOUSE	21	21	21	52.8	52.8	52.8	67.63	0	323.31	7676500000	1236	27.4529	27.0477	26.8797	27.0476	27.5038	27.7091	27.0443	26.7847	27.7152	27.012	P40142	TKT_MOUSE	Tkt	Transketolase
D3Z041	D3Z041_MOUSE	Acsl1	Long-chain-fatty-acid--CoA ligase 1		0.407272	0.570637	tr|D3Z041|D3Z041_MOUSE;sp|P41216|ACSL1_MOUSE	17	17	17	30.2	30.2	30.2	78.034	0	51.919	213180000	78	22.6565	22.6108	21.2645	22.0661	24.823	22.6672	21.8281	21.78	22.6245	21.6679	D3Z041	D3Z041_MOUSE	Acsl1	Long-chain-fatty-acid--CoA ligase 1
P42703	LIFR_MOUSE	Lifr	Leukemia inhibitory factor receptor		0.570884	-0.395369	sp|P42703|LIFR_MOUSE	9	9	9	11.3	11.3	11.3	122.57	0	27.297	190800000	72	21.6023	22.6119	22.713	23.2184	22.2205	22.8629	22.9998	23.3358	22.156	22.9885	P42703	LIFR_MOUSE	Lifr	Leukemia inhibitory factor receptor
P43883	PLIN2_MOUSE	Plin2	Perilipin-2		0.391452	0.137831	sp|P43883|PLIN2_MOUSE;tr|B1AXR5|B1AXR5_MOUSE	14	14	14	41.9	41.9	41.9	46.646	0	323.31	437150000	255	22.7148	22.6315	23.1437	22.5951	23.0232	22.7935	23.0089	22.5216	22.3612	22.7338	P43883	PLIN2_MOUSE	Plin2	Perilipin-2
P45376	ALDR_MOUSE	Akr1b1	Aldo-keto reductase family 1 member B1		0.580038	-0.926858	sp|P45376|ALDR_MOUSE	5	5	5	25	25	25	35.732	0	75.792	160060000	58	23.0791	19.3428	20.4003	21.8995	23.0968	22.4383	22.0236	22.1543	23.15	22.6865	P45376	ALDR_MOUSE	Akr1b1	Aldo-keto reductase family 1 member B1
P46412	GPX3_MOUSE	Gpx3	Glutathione peroxidase 3		0.397485	-0.857602	sp|P46412|GPX3_MOUSE;tr|A0A1C7ZMZ5|A0A1C7ZMZ5_MOUSE;tr|A0A1C7ZMZ7|A0A1C7ZMZ7_MOUSE	5	5	5	29.2	29.2	29.2	25.424	0.0020704	13.916	85789000	55	22.9608	23.4029	23.1119	19.18	19.4845	22.105	22.8905	22.6745	21.8458	22.9122	P46412	GPX3_MOUSE	Gpx3	Glutathione peroxidase 3
P47754	CAZA2_MOUSE	Capza2	F-actin-capping protein subunit alpha-2		0.909525	-1.06813	sp|P47754|CAZA2_MOUSE;tr|A0A0N4SVM0|A0A0N4SVM0_MOUSE;tr|D6RCW7|D6RCW7_MOUSE	7	7	5	37.1	37.1	27.6	32.967	0.0022573	19.144	85896000	55	22.3558	21.5503	20.3647	19.4055	22.3623	22.6169	21.9813	21.756	22.944	22.081	P47754	CAZA2_MOUSE	Capza2	F-actin-capping protein subunit alpha-2
P47757	CAPZB_MOUSE	Capzb	F-actin-capping protein subunit beta		0.781047	-0.38155	sp|P47757|CAPZB_MOUSE;tr|F7CAZ6|F7CAZ6_MOUSE;tr|A0A0A0MQI9|A0A0A0MQI9_MOUSE;tr|F6YHZ8|F6YHZ8_MOUSE	8	8	1	37.2	37.2	4.7	31.345	0	323.31	154510000	57	22.0496	21.7771	21.6366	21.847	22.3498	22.4159	21.81	21.8684	22.985	22.4884	P47757	CAPZB_MOUSE	Capzb	F-actin-capping protein subunit beta
P48758	CBR1_MOUSE	Cbr1	Carbonyl reductase [NADPH] 1		0.126405	-0.184455	sp|P48758|CBR1_MOUSE	12	12	12	50.2	50.2	50.2	30.641	0	64.715	216250000	88	23.9953	22.6903	22.4906	22.4706	23.5801	23.8895	22.8531	21.658	24.2578	23.4909	P48758	CBR1_MOUSE	Cbr1	Carbonyl reductase [NADPH] 1
P49182	HEP2_MOUSE	Serpind1	Heparin cofactor 2		0.194982	0.116165	sp|P49182|HEP2_MOUSE	11	11	11	33.7	33.7	33.7	54.496	0	323.31	1694300000	353	25.017	25.5087	25.437	25.3794	24.5902	25.0223	25.3367	25.4242	24.4838	25.0844	P49182	HEP2_MOUSE	Serpind1	Heparin cofactor 2
P50516	VATA_MOUSE	Atp6v1a	V-type proton ATPase catalytic subunit A		0.087136	0.253087	sp|P50516|VATA_MOUSE;tr|D3Z1B9|D3Z1B9_MOUSE	4	4	4	6.6	6.6	6.6	68.325	0.0018939	10.569	59401000	28	23.2133	22.3811	20.2408	19.534	22.7004	22.1192	18.5931	20.7297	22.8315	22.5306	P50516	VATA_MOUSE	Atp6v1a	V-type proton ATPase catalytic subunit A
P51150	RAB7A_MOUSE	Rab7a	Ras-related protein Rab-7a		0.567948	0.312203	sp|P51150|RAB7A_MOUSE	4	4	4	23.2	23.2	23.2	23.489	0.0021786	16.887	29859000	30	20.0308	20.9114	21.1223	20.7808	20.8301	20.9665	19.9331	20.6549	20.0897	20.4703	P51150	RAB7A_MOUSE	Rab7a	Ras-related protein Rab-7a
P52430	PON1_MOUSE	Pon1	Serum paraoxonase/arylesterase 1		0.312635	-0.200762	sp|P52430|PON1_MOUSE;tr|H3BK03|H3BK03_MOUSE	5	5	5	16.9	16.9	16.9	39.565	0	53.906	128720000	50	22.0736	22.5465	22.7523	22.2628	21.663	22.3658	22.7807	22.9772	21.818	22.3602	P52430	PON1_MOUSE	Pon1	Serum paraoxonase/arylesterase 1
P52480	KPYM_MOUSE	Pkm	Pyruvate kinase PKM		0.122463	-0.0861454	sp|P52480|KPYM_MOUSE	28	28	28	69.3	69.3	69.3	57.844	0	323.31	12482000000	1673	26.9734	26.4465	26.438	26.0776	27.2895	26.8382	26.512	26.2938	27.2123	26.7993	P52480	KPYM_MOUSE	Pkm	Pyruvate kinase PKM
J3QQ30	J3QQ30_MOUSE	Pitpna	Phosphatidylinositol transfer protein alpha isoform		1.19836	-1.33583	tr|J3QQ30|J3QQ30_MOUSE;sp|P53810|PIPNA_MOUSE;tr|J3QPW1|J3QPW1_MOUSE;tr|F8WGG5|F8WGG5_MOUSE	4	4	4	24.7	24.7	24.7	31.837	0	27.665	78816000	25	22.3912	19.9542	20.2006	19.0014	21.6702	21.8155	21.7316	22.201	22.2431	21.9055	J3QQ30	J3QQ30_MOUSE	Pitpna	Phosphatidylinositol transfer protein alpha isoform
Q3U4W8	Q3U4W8_MOUSE	Usp5	Ubiquitin carboxyl-terminal hydrolase		0.556204	-0.697651	tr|Q3U4W8|Q3U4W8_MOUSE;sp|P56399|UBP5_MOUSE	6	6	6	9	9	9	93.354	0	50.991	52962000	33	21.3901	20.8939	19.5364	20.1563	21.7508	21.4622	22.151	19.808	22.307	21.4876	Q3U4W8	Q3U4W8_MOUSE	Usp5	Ubiquitin carboxyl-terminal hydrolase
P56480	ATPB_MOUSE	Atp5f1b	ATP synthase subunit beta, mitochondrial		0.834263	1.33324	sp|P56480|ATPB_MOUSE	9	9	9	25	25	25	56.3	0	27.831	123200000	52	24.0116	21.7919	21.74	20.9033	22.6325	19.8071	22.0862	19.7621	22.7691	19.9886	P56480	ATPB_MOUSE	Atp5f1b	ATP synthase subunit beta, mitochondrial
P56677	ST14_MOUSE	St14	Suppressor of tumorigenicity 14 protein homolog		0.501423	0.17308	sp|P56677|ST14_MOUSE	4	4	4	8.3	8.3	8.3	94.654	0.0019231	11.075	54733000	31	22.3208	22.3635	22.4379	22.4499	21.9528	22.1939	22.5224	22.0712	21.6924	22.1796	P56677	ST14_MOUSE	St14	Suppressor of tumorigenicity 14 protein homolog
Q80T06	Q80T06_MOUSE	Eef1d	Elongation factor 1-delta		0.834536	0.752037	tr|Q80T06|Q80T06_MOUSE;sp|P57776|EF1D_MOUSE;tr|Q91VK2|Q91VK2_MOUSE;tr|A0A0R4J1E2|A0A0R4J1E2_MOUSE;tr|D3YY68|D3YY68_MOUSE;tr|E9QN08|E9QN08_MOUSE;tr|D3YUQ9|D3YUQ9_MOUSE	8	6	1	32	27.8	8.5	31.292	0	33.892	92323000	36	21.6139	21.6134	21.1819	21.4171	21.3974	21.5014	19.1952	20.0333	21.3345	21.3992	Q80T06	Q80T06_MOUSE	Eef1d	Elongation factor 1-delta
P57780	ACTN4_MOUSE	Actn4	Alpha-actinin-4		0.346039	0.364419	sp|P57780|ACTN4_MOUSE;tr|A0A1L1SV25|A0A1L1SV25_MOUSE;tr|E9Q2W9|E9Q2W9_MOUSE	20	20	19	29.4	29.4	28.2	104.98	0	132.71	166580000	91	22.4494	22.1632	22.144	22.1369	22.3534	22.9423	21.7314	20.3442	22.6648	21.7421	P57780	ACTN4_MOUSE	Actn4	Alpha-actinin-4
P58252	EF2_MOUSE	Eef2	Elongation factor 2		0.307714	-0.157244	sp|P58252|EF2_MOUSE	37	37	37	43.8	43.8	43.8	95.313	0	323.31	6651700000	1305	26.3846	25.8089	25.981	25.8239	26.4129	26.1757	26.0289	25.8359	26.863	26.294	P58252	EF2_MOUSE	Eef2	Elongation factor 2
P60335	PCBP1_MOUSE	Pcbp1	Poly(rC)-binding protein 1		0.386587	-0.274201	sp|P60335|PCBP1_MOUSE	8	8	6	40.7	40.7	32	37.497	0	323.31	141280000	74	23.2771	22.5621	22.4129	22.4303	23.3828	23.5273	22.6595	22.5439	23.722	22.9835	P60335	PCBP1_MOUSE	Pcbp1	Poly(rC)-binding protein 1
P60710	ACTB_MOUSE	Actb	Actin, cytoplasmic 1		0.239279	-0.0829628	sp|P60710|ACTB_MOUSE;tr|E9Q1F2|E9Q1F2_MOUSE;tr|E9Q5F4|E9Q5F4_MOUSE;tr|G3UZ07|G3UZ07_MOUSE	18	18	1	62.1	62.1	4.5	41.736	0	323.31	7193000000	1139	28.0077	27.8316	28.1276	27.848	27.9728	28.4053	28.1402	27.6549	28.1618	27.8403	P60710	ACTB_MOUSE	Actb	Actin, cytoplasmic 1
P60843	IF4A1_MOUSE	Eif4a1	Eukaryotic initiation factor 4A-I		0.0381643	-0.0399632	sp|P60843|IF4A1_MOUSE	14	14	9	41.1	41.1	23.4	46.153	0	304.5	740500000	251	24.464	23.775	24.0027	23.6851	25.018	24.4205	23.4413	23.7841	24.9337	24.5651	P60843	IF4A1_MOUSE	Eif4a1	Eukaryotic initiation factor 4A-I
A0A0J9YUI1	A0A0J9YUI1_MOUSE	Ube2k	Ubiquitin-conjugating enzyme E2 K		0.619682	0.540734	tr|A0A0J9YUI1|A0A0J9YUI1_MOUSE;sp|P61087|UBE2K_MOUSE;tr|D3Z4U3|D3Z4U3_MOUSE	5	5	5	44.6	44.6	44.6	15.81	0	85.085	68610000	39	21.4481	20.7649	21.0728	21.4036	22.0376	21.336	20.0554	20.408	21.9884	20.2356	A0A0J9YUI1	A0A0J9YUI1_MOUSE	Ube2k	Ubiquitin-conjugating enzyme E2 K
P61089	UBE2N_MOUSE	Ube2n	Ubiquitin-conjugating enzyme E2 N		0.612868	1.14722	sp|P61089|UBE2N_MOUSE;tr|A0A1W2P7Z3|A0A1W2P7Z3_MOUSE	5	5	5	41.4	41.4	41.4	17.138	0	24.821	124010000	52	23.9817	22.9963	23.1236	22.6587	23.8944	23.715	19.701	20.4489	23.8076	23.246	P61089	UBE2N_MOUSE	Ube2n	Ubiquitin-conjugating enzyme E2 N
P84078	ARF1_MOUSE	Arf1	ADP-ribosylation factor 1		0.0521321	0.063895	sp|P84078|ARF1_MOUSE;sp|P61205|ARF3_MOUSE;sp|Q8BSL7|ARF2_MOUSE;sp|P84084|ARF5_MOUSE	10	10	6	59.7	59.7	29.8	20.697	0	243.58	349570000	171	23.6003	23.609	23.374	22.994	23.6917	23.9091	21.805	23.4335	24.1847	23.6171	P84078	ARF1_MOUSE	Arf1	ADP-ribosylation factor 1
P61961	UFM1_MOUSE	Ufm1	Ubiquitin-fold modifier 1		0.0229759	-0.0805443	sp|P61961|UFM1_MOUSE	3	3	3	58.8	58.8	58.8	9.1175	0	109.43	181360000	59	25.1563	19.7687	24.5428	24.5498	25.4965	24.6307	24.1509	21.6358	24.8408	24.6587	P61961	UFM1_MOUSE	Ufm1	Ubiquitin-fold modifier 1
P62259	1433E_MOUSE	Ywhae	14-3-3 protein epsilon		0.38175	-0.21704	sp|P62259|1433E_MOUSE	7	5	5	34.9	27.8	27.8	29.174	0	259.8	359160000	142	23.0221	22.5769	22.744	22.4914	22.9024	23.235	22.4982	22.3096	23.3685	23.4107	P62259	1433E_MOUSE	Ywhae	14-3-3 protein epsilon
P62774	MTPN_MOUSE	Mtpn	Myotrophin		0.946611	-0.830976	sp|P62774|MTPN_MOUSE	3	3	3	33.1	33.1	33.1	12.861	0	323.31	91245000	43	21.2016	20.4988	19.8563	20.5717	21.3719	21.4984	20.1816	21.5788	22.495	21.9013	P62774	MTPN_MOUSE	Mtpn	Myotrophin
Q5SW88	Q5SW88_MOUSE	Rab1a	RAB1A, member RAS oncogene family		1.62727	-0.270303	tr|Q5SW88|Q5SW88_MOUSE;sp|P62821|RAB1A_MOUSE;tr|Q5SW87|Q5SW87_MOUSE;tr|Q5SW86|Q5SW86_MOUSE	6	6	3	46	46	27.2	22.372	0	27.653	169440000	64	22.8923	23.0323	22.6998	22.6931	22.5521	23.1158	22.8851	22.9846	23.1401	23.0956	Q5SW88	Q5SW88_MOUSE	Rab1a	RAB1A, member RAS oncogene family
P62827	RAN_MOUSE	Ran	GTP-binding nuclear protein Ran		0.754612	-1.5305	sp|P62827|RAN_MOUSE;sp|Q61820|RANT_MOUSE	6	6	6	31.5	31.5	31.5	24.423	0	39.446	94221000	42	20.4364	21.7631	18.7024	18.9556	22.666	23.2285	20.0099	20.7973	23.3423	22.798	P62827	RAN_MOUSE	Ran	GTP-binding nuclear protein Ran
P62897	CYC_MOUSE	Cycs	Cytochrome c, somatic		0.0100902	-0.0133541	sp|P62897|CYC_MOUSE	6	6	6	49.5	49.5	49.5	11.605	0	126.26	898870000	132	27.1352	25.93	24.9742	25.2998	26.7669	26.57	25.7011	26.3321	25.857	25.7126	P62897	CYC_MOUSE	Cycs	Cytochrome c, somatic
P62960	YBOX1_MOUSE	Ybx1	Y-box-binding protein 1		0.158565	0.339354	sp|P62960|YBOX1_MOUSE;tr|A2BGG7|A2BGG7_MOUSE;sp|Q9JKB3|YBOX3_MOUSE	4	4	4	18.9	18.9	18.9	35.73	0	75.584	90516000	27	22.1919	20.9302	18.8846	18.8176	21.8288	19.8387	19.4814	20.0149	21.8535	19.7678	P62960	YBOX1_MOUSE	Ybx1	Y-box-binding protein 1
P63017	HSP7C_MOUSE	Hspa8	Heat shock cognate 71 kDa protein		0.073082	-0.0346863	sp|P63017|HSP7C_MOUSE;tr|Q504P4|Q504P4_MOUSE	23	23	20	41.2	41.2	37.5	70.87	0	323.31	5791200000	1239	25.9851	25.8149	25.8565	25.9094	26.5795	26.1296	25.9687	25.7532	26.3532	26.1141	P63017	HSP7C_MOUSE	Hspa8	Heat shock cognate 71 kDa protein
P63028	TCTP_MOUSE	Tpt1	Translationally-controlled tumor protein		0.0296976	0.0265877	sp|P63028|TCTP_MOUSE	4	4	4	24.4	24.4	24.4	19.462	0	323.31	1107900000	203	24.6028	25.0309	24.4376	24.6177	25.6329	24.5204	24.205	25.1666	25.4634	24.8334	P63028	TCTP_MOUSE	Tpt1	Translationally-controlled tumor protein
P63038	CH60_MOUSE	Hspd1	60 kDa heat shock protein, mitochondrial		0.0943562	-0.100672	sp|P63038|CH60_MOUSE	14	14	14	34.4	34.4	34.4	60.955	0	323.31	347720000	170	24.3794	22.9737	23.0313	23.2309	24.2464	23.7755	23.4265	23.3152	24.5963	23.2516	P63038	CH60_MOUSE	Hspd1	60 kDa heat shock protein, mitochondrial
P63101	1433Z_MOUSE	Ywhaz	14-3-3 protein zeta/delta		0.814601	-0.364144	sp|P63101|1433Z_MOUSE;tr|A0A2I3BQ03|A0A2I3BQ03_MOUSE	8	8	6	42.9	42.9	35.5	27.771	0	323.31	1202800000	306	25.8035	25.2984	25.2099	25.2672	26.1116	26.0373	25.6897	25.5021	26.3529	25.9294	P63101	1433Z_MOUSE	Ywhaz	14-3-3 protein zeta/delta
A0A0A0MQM0	A0A0A0MQM0_MOUSE	Eif5a	Eukaryotic translation initiation factor 5A (Fragment)		0.754104	-1.21853	tr|A0A0A0MQM0|A0A0A0MQM0_MOUSE;sp|P63242|IF5A1_MOUSE;sp|Q8BGY2|IF5A2_MOUSE	8	8	8	61.7	61.7	61.7	16.302	0	86.244	510340000	108	24.784	22.8561	20.3749	23.8467	24.4409	24.5492	24.2565	23.879	25.2034	24.5071	A0A0A0MQM0	A0A0A0MQM0_MOUSE	Eif5a	Eukaryotic translation initiation factor 5A (Fragment)
P68134	ACTS_MOUSE	Acta1	Actin, alpha skeletal muscle		0.34243	0.810444	sp|P68134|ACTS_MOUSE;sp|P68033|ACTC_MOUSE;sp|P63268|ACTH_MOUSE;sp|P62737|ACTA_MOUSE;tr|D3Z2K3|D3Z2K3_MOUSE;tr|A0A494B9T3|A0A494B9T3_MOUSE;tr|D3YZY0|D3YZY0_MOUSE;tr|A0A1D5RM20|A0A1D5RM20_MOUSE	10	2	2	28.9	10.3	10.3	42.051	0	323.31	691710000	56	24.9966	24.8097	24.2332	24.3079	24.5731	24.7553	24.6113	19.7175	25.228	24.5561	P68134	ACTS_MOUSE	Acta1	Actin, alpha skeletal muscle
A0A338P702	A0A338P702_MOUSE	Ube2l3	Ubiquitin-conjugating enzyme E2 L3		0.183143	-0.469864	tr|A0A338P702|A0A338P702_MOUSE;tr|A0A338P7E5|A0A338P7E5_MOUSE;tr|A0A338P786|A0A338P786_MOUSE;sp|P68037|UB2L3_MOUSE	2	2	2	28.9	28.9	28.9	13.173	0.0015552	5.8341	79955000	37	23.1456	19.8611	19.5096	22.586	23.3519	22.8702	22.7063	19.8462	22.9409	22.4401	A0A338P702	A0A338P702_MOUSE	Ube2l3	Ubiquitin-conjugating enzyme E2 L3
P68254	1433T_MOUSE	Ywhaq	14-3-3 protein theta		0.106679	-0.201219	sp|P68254|1433T_MOUSE	7	5	5	38	30.6	30.6	27.778	0	266.92	77256000	39	22.5977	21.1706	20.3167	19.1368	22.3651	21.5131	21.6066	20.2091	21.7787	21.4855	P68254	1433T_MOUSE	Ywhaq	14-3-3 protein theta
P68372	TBB4B_MOUSE	Tubb4b	Tubulin beta-4B chain		0.228554	-0.235031	sp|P68372|TBB4B_MOUSE;sp|Q9D6F9|TBB4A_MOUSE;sp|Q9CWF2|TBB2B_MOUSE;sp|Q7TMM9|TBB2A_MOUSE;sp|Q9ERD7|TBB3_MOUSE	19	19	4	56	56	16	49.83	0	218.63	446540000	206	24.5527	23.9271	23.8109	23.8761	23.4389	25.0985	24.5626	23.0386	24.5641	23.517	P68372	TBB4B_MOUSE	Tubb4b	Tubulin beta-4B chain
P70124	SPB5_MOUSE	Serpinb5	Serpin B5		0.507757	-0.232928	sp|P70124|SPB5_MOUSE	12	12	12	41.9	41.9	41.9	42.111	0	150.19	530810000	218	23.4762	22.7882	22.7801	22.6332	23.2544	23.578	22.9768	22.8541	23.5114	23.1763	P70124	SPB5_MOUSE	Serpinb5	Serpin B5
P70274	SEPP1_MOUSE	Selenop	Selenoprotein P		0.948285	1.40465	sp|P70274|SEPP1_MOUSE;tr|E0CX80|E0CX80_MOUSE;tr|E0CZ76|E0CZ76_MOUSE	4	4	4	12.1	12.1	12.1	42.705	0	136.68	110450000	32	22.1564	22.259	22.2258	22.1742	21.9612	22.3967	18.7377	22.129	21.5107	18.9794	P70274	SEPP1_MOUSE	Selenop	Selenoprotein P
P70296	PEBP1_MOUSE	Pebp1	Phosphatidylethanolamine-binding protein 1		0.244818	-0.172013	sp|P70296|PEBP1_MOUSE;tr|D3Z1V4|D3Z1V4_MOUSE;tr|D6RHS6|D6RHS6_MOUSE	8	8	8	73.8	73.8	73.8	20.83	0	323.31	758440000	151	24.7457	24.4933	24.7058	24.1871	25.371	24.8431	24.3334	24.5135	25.5229	25.15	P70296	PEBP1_MOUSE	Pebp1	Phosphatidylethanolamine-binding protein 1
P70349	HINT1_MOUSE	Hint1	Histidine triad nucleotide-binding protein 1		0.00837342	-0.00652885	sp|P70349|HINT1_MOUSE;tr|B0R1E3|B0R1E3_MOUSE	5	5	5	71.4	71.4	71.4	13.777	0	113.12	408260000	184	24.2166	23.8456	23.3483	23.7503	24.3878	23.6991	24.1794	23.3535	24.461	23.8881	P70349	HINT1_MOUSE	Hint1	Histidine triad nucleotide-binding protein 1
A0A0R4J0S2	A0A0R4J0S2_MOUSE	Igfals	Insulin-like growth factor-binding protein complex acid labile subunit		0.0575077	-0.0468102	tr|A0A0R4J0S2|A0A0R4J0S2_MOUSE;sp|P70389|ALS_MOUSE	23	23	23	43	43	43	66.989	0	323.31	3617400000	739	26.2886	26.9348	27.1422	27.4342	26.5117	26.8635	27.4277	27.2273	26.2493	26.7778	A0A0R4J0S2	A0A0R4J0S2_MOUSE	Igfals	Insulin-like growth factor-binding protein complex acid labile subunit
P70441	NHRF1_MOUSE	Slc9a3r1	Na(+)/H(+) exchange regulatory cofactor NHE-RF1		0.735355	-0.317222	sp|P70441|NHRF1_MOUSE	6	6	6	24.8	24.8	24.8	38.6	0	93.587	135890000	60	22.3219	22.1378	21.8919	21.7467	21.7389	22.7107	22.2391	21.6192	22.3195	22.5348	P70441	NHRF1_MOUSE	Slc9a3r1	Na(+)/H(+) exchange regulatory cofactor NHE-RF1
Q60817	NACA_MOUSE	Naca	Nascent polypeptide-associated complex subunit alpha		0.0627389	-0.0542053	sp|Q60817|NACA_MOUSE;sp|P70670|NACAM_MOUSE	2	2	2	13.5	13.5	13.5	23.384	0	234.32	75626000	35	21.0224	20.9469	20.4049	20.4228	21.5545	20.6043	21.1806	20.6815	21.6831	20.473	Q60817	NACA_MOUSE	Naca	Nascent polypeptide-associated complex subunit alpha
P70677	CASP3_MOUSE	Casp3	Caspase-3		0.230945	0.32539	sp|P70677|CASP3_MOUSE	5	5	5	21.3	21.3	21.3	31.474	0	28.693	102450000	50	22.4024	21.892	21.6963	21.8742	22.6881	22.1863	20.4406	20.5436	23.022	22.7336	P70677	CASP3_MOUSE	Casp3	Caspase-3
P81117	NUCB2_MOUSE	Nucb2	Nucleobindin-2		0.0233125	-0.0149647	sp|P81117|NUCB2_MOUSE;tr|Q3UKN6|Q3UKN6_MOUSE	21	21	21	46.7	46.7	46.7	50.304	0	323.31	6486700000	1006	26.0257	26.1499	26.6364	26.4462	25.713	26.0236	26.73	26.3696	25.9176	26.0052	P81117	NUCB2_MOUSE	Nucb2	Nucleobindin-2
P97290	IC1_MOUSE	Serping1	Plasma protease C1 inhibitor		0.00286246	-0.00191536	sp|P97290|IC1_MOUSE;tr|A2ATR8|A2ATR8_MOUSE	12	12	12	30.8	30.8	30.8	55.584	0	323.31	1634300000	320	24.965	25.7754	25.4337	25.4206	25.4991	25.2813	25.5404	26.0393	24.9195	25.3229	P97290	IC1_MOUSE	Serping1	Plasma protease C1 inhibitor
P97298	PEDF_MOUSE	Serpinf1	Pigment epithelium-derived factor		1.30778	0.648642	sp|P97298|PEDF_MOUSE	7	7	7	18	18	18	46.233	0	38.056	73147000	37	20.7522	21.7183	21.1626	21.5633	20.6757	20.0203	20.3507	20.9855	20.3423	20.9301	P97298	PEDF_MOUSE	Serpinf1	Pigment epithelium-derived factor
E9PX84	E9PX84_MOUSE	Dab2	Disabled homolog 2		0.889159	-0.956652	tr|E9PX84|E9PX84_MOUSE;tr|Q3TRE6|Q3TRE6_MOUSE;tr|E9QL31|E9QL31_MOUSE;tr|A0A0R4J104|A0A0R4J104_MOUSE;sp|P98078|DAB2_MOUSE;tr|Q9DCE6|Q9DCE6_MOUSE;tr|E0CXT5|E0CXT5_MOUSE;tr|F6TQN9|F6TQN9_MOUSE	7	7	7	17.8	17.8	17.8	56.503	0	35.683	106160000	55	21.7014	21.7956	19.4707	21.2411	22.3206	22.1529	21.3914	22.0759	23.0776	22.6149	E9PX84	E9PX84_MOUSE	Dab2	Disabled homolog 2
P99027	RLA2_MOUSE	Rplp2	60S acidic ribosomal protein P2		1.13002	0.457894	sp|P99027|RLA2_MOUSE	3	3	3	25.2	25.2	25.2	11.651	0.0019084	10.807	31801000	16	20.6178	20.4512	20.1187	19.8385	20.4872	19.7438	20.2084	19.2895	19.7716	20.2105	P99027	RLA2_MOUSE	Rplp2	60S acidic ribosomal protein P2
P99029	PRDX5_MOUSE	Prdx5	Peroxiredoxin-5, mitochondrial		0.750849	-0.395362	sp|P99029|PRDX5_MOUSE;tr|G3UZJ4|G3UZJ4_MOUSE;tr|A0A494BAZ4|A0A494BAZ4_MOUSE;tr|H3BJQ7|H3BJQ7_MOUSE	8	8	8	41	41	41	21.897	0	30.157	413440000	139	23.9197	22.7996	23.0492	22.9706	23.716	23.8743	23.6157	23.1845	24.085	23.6725	P99029	PRDX5_MOUSE	Prdx5	Peroxiredoxin-5, mitochondrial
Q00519	XDH_MOUSE	Xdh	Xanthine dehydrogenase/oxidase		0.624595	0.19851	sp|Q00519|XDH_MOUSE	24	24	24	28.5	28.5	28.5	146.56	0	323.31	1123900000	370	24.9212	24.3296	24.8239	24.4988	25.0307	24.6533	24.4025	24.3798	24.3962	24.7798	Q00519	XDH_MOUSE	Xdh	Xanthine dehydrogenase/oxidase
Q00612	G6PD1_MOUSE	G6pdx	Glucose-6-phosphate 1-dehydrogenase X		0.290122	-0.174811	sp|Q00612|G6PD1_MOUSE;tr|A3KG36|A3KG36_MOUSE	27	27	27	66	66	66	59.262	0	323.31	2594200000	551	26.0325	25.7761	25.5017	25.2428	26.2386	25.9257	25.6103	25.5263	26.5501	26.0533	Q00612	G6PD1_MOUSE	G6pdx	Glucose-6-phosphate 1-dehydrogenase X
Q00623	APOA1_MOUSE	Apoa1	Apolipoprotein A-I		0.0842661	-0.0624668	sp|Q00623|APOA1_MOUSE	15	15	15	45.1	45.1	45.1	30.615	0	323.31	31924000000	1989	28.185	28.9248	28.8717	28.6172	27.8611	28.263	28.8164	29.1004	28.1431	28.4493	Q00623	APOA1_MOUSE	Apoa1	Apolipoprotein A-I
Q00897	A1AT4_MOUSE	Serpina1d	Alpha-1-antitrypsin 1-4		0.192984	-0.126323	sp|Q00897|A1AT4_MOUSE	24	24	11	56.4	56.4	27.6	45.998	0	323.31	45616000000	3793	28.8089	29.4253	29.4571	29.4541	28.636	29.1111	29.0779	29.942	28.8475	29.4345	Q00897	A1AT4_MOUSE	Serpina1d	Alpha-1-antitrypsin 1-4
Q00898	A1AT5_MOUSE	Serpina1e	Alpha-1-antitrypsin 1-5		0.25742	-0.324327	sp|Q00898|A1AT5_MOUSE	15	9	9	36.6	23.2	23.2	45.891	0	323.31	1220300000	259	24.0499	25.3339	24.8431	25.2726	22.7195	24.4957	24.2185	24.8466	24.9729	25.307	Q00898	A1AT5_MOUSE	Serpina1e	Alpha-1-antitrypsin 1-5
Q9WVF5	Q9WVF5_MOUSE	Egfr	Receptor protein-tyrosine kinase		0.31867	-0.23859	tr|Q9WVF5|Q9WVF5_MOUSE;sp|Q01279|EGFR_MOUSE	6	6	6	9.3	9.3	9.3	72.906	0	45.494	149820000	101	23.3224	23.4183	23.8699	24.3651	23.6287	24.1467	23.1858	24.6886	23.5686	24.2075	Q9WVF5	Q9WVF5_MOUSE	Egfr	Receptor protein-tyrosine kinase
Q01339	APOH_MOUSE	Apoh	Beta-2-glycoprotein 1		0.175992	0.19505	sp|Q01339|APOH_MOUSE;tr|I7HJR3|I7HJR3_MOUSE	11	11	11	36.5	36.5	36.5	38.618	0	295.29	1296100000	287	23.9399	25.6897	25.3935	25.6145	24.1578	24.5252	24.8041	25.522	24.1777	24.7911	Q01339	APOH_MOUSE	Apoh	Beta-2-glycoprotein 1
Q01853	TERA_MOUSE	Vcp	Transitional endoplasmic reticulum ATPase		0.217673	-0.371831	sp|Q01853|TERA_MOUSE	8	8	8	11.9	11.9	11.9	89.321	0	21.582	68811000	42	21.7043	21.6664	18.8121	21.9527	22.5068	22.1727	20.7654	21.7081	22.024	21.8311	Q01853	TERA_MOUSE	Vcp	Transitional endoplasmic reticulum ATPase
Q02053	UBA1_MOUSE	Uba1	Ubiquitin-like modifier-activating enzyme 1		0.0190026	0.0465855	sp|Q02053|UBA1_MOUSE	16	16	16	21.7	21.7	21.7	117.81	0	323.31	227180000	128	22.751	21.7149	20.8908	21.8139	23.0406	22.9763	20.7693	19.7178	23.6611	22.8537	Q02053	UBA1_MOUSE	Uba1	Ubiquitin-like modifier-activating enzyme 1
Q02596	GLCM1_MOUSE	Glycam1	Glycosylation-dependent cell adhesion molecule 1		0.638065	0.54417	sp|Q02596|GLCM1_MOUSE;tr|B7ZNZ9|B7ZNZ9_MOUSE	10	10	3	77.5	77.5	36.4	16.209	0	323.31	381630000000	11366	31.6425	31.5753	32.5074	33.1267	32.1541	31.6223	32.7399	31.5885	30.8551	31.4794	Q02596	GLCM1_MOUSE	Glycam1	Glycosylation-dependent cell adhesion molecule 1
A0A0G2JGC6	A0A0G2JGC6_MOUSE	Csn1s2a	Alpha-S2-casein-like A		0.388612	0.240808	tr|A0A0G2JGC6|A0A0G2JGC6_MOUSE;tr|A0A0G2JET6|A0A0G2JET6_MOUSE;tr|Q3TP41|Q3TP41_MOUSE;sp|Q02862|CS2LA_MOUSE	3	3	3	30.2	30.2	30.2	19.333	0	323.31	1602400000	162	25.5181	26.1674	26.0555	26.051	25.2692	25.4275	26.2644	25.1812	25.1484	25.8358	A0A0G2JGC6	A0A0G2JGC6_MOUSE	Csn1s2a	Alpha-S2-casein-like A
Q03265	ATPA_MOUSE	Atp5f1a	ATP synthase subunit alpha, mitochondrial		0.115618	-0.240179	sp|Q03265|ATPA_MOUSE;tr|D3Z6F5|D3Z6F5_MOUSE	8	8	8	20.4	20.4	20.4	59.752	0	51.296	66584000	29	22.2084	18.8941	20.137	19.5413	21.089	21.0023	21.0257	18.6163	21.6324	20.7942	Q03265	ATPA_MOUSE	Atp5f1a	ATP synthase subunit alpha, mitochondrial
Q03734	SPA3M_MOUSE	Serpina3m	Serine protease inhibitor A3M		0.279401	0.580634	sp|Q03734|SPA3M_MOUSE	12	3	3	32.5	10.3	10.3	47.064	0.0019646	11.754	31136000	21	22.3254	22.7884	19.3114	19.4049	21.3398	21.9745	19.8153	19.0533	20.8376	20.5861	Q03734	SPA3M_MOUSE	Serpina3m	Serine protease inhibitor A3M
Q05816	FABP5_MOUSE	Fabp5	Fatty acid-binding protein 5		0.491062	0.431647	sp|Q05816|FABP5_MOUSE	7	7	7	65.9	65.9	65.9	15.137	0	323.31	335060000	72	23.159	22.6045	23.0808	22.6052	23.452	23.108	22.7002	21.2603	23.4063	22.2685	Q05816	FABP5_MOUSE	Fabp5	Fatty acid-binding protein 5
Q06770	CBG_MOUSE	Serpina6	Corticosteroid-binding globulin		0.860122	-0.517924	sp|Q06770|CBG_MOUSE	6	6	6	17.9	17.9	17.9	44.769	0	181.81	916080000	164	24.1949	25.0945	25.4358	24.9777	24.7606	25.5473	25.7777	25.8789	24.5482	25.3009	Q06770	CBG_MOUSE	Serpina6	Corticosteroid-binding globulin
Q06890	CLUS_MOUSE	Clu	Clusterin		1.33123	0.442661	sp|Q06890|CLUS_MOUSE;tr|E9PUU2|E9PUU2_MOUSE;tr|E9PXG5|E9PXG5_MOUSE;tr|E9Q8Y5|E9Q8Y5_MOUSE	21	21	21	41.7	41.7	41.7	51.655	0	323.31	50380000000	2915	29.3484	29.6524	29.5713	29.3287	29.0263	29.2296	29.2577	29.0093	28.4344	28.7827	Q06890	CLUS_MOUSE	Clu	Clusterin
Q07456	AMBP_MOUSE	Ambp	Protein AMBP		0.0122782	0.00832901	sp|Q07456|AMBP_MOUSE	6	6	6	17.5	17.5	17.5	39.029	0	174.61	216310000	69	23.4415	23.6637	24.0191	24.3262	23.4243	23.6798	24.0763	24.0858	23.2661	23.7253	Q07456	AMBP_MOUSE	Ambp	Protein AMBP
Q11011	PSA_MOUSE	Npepps	Puromycin-sensitive aminopeptidase		0.076792	0.246567	sp|Q11011|PSA_MOUSE;tr|F6QYF8|F6QYF8_MOUSE;tr|E9Q039|E9Q039_MOUSE;tr|E9Q6F4|E9Q6F4_MOUSE	14	14	14	17.4	17.4	17.4	103.32	0	44.552	302700000	51	23.3541	23.0157	21.6323	19.6544	24.0524	22.9185	20.8063	19.4404	24.3054	23.0056	Q11011	PSA_MOUSE	Npepps	Puromycin-sensitive aminopeptidase
Q14AE4	WFDC3_MOUSE	Wfdc3	WAP four-disulfide core domain protein 3		0.606988	0.22494	sp|Q14AE4|WFDC3_MOUSE	3	3	3	45.4	45.4	45.4	13.718	0	323.31	1544100000	138	28.2164	28.4141	27.7334	28.4946	27.7558	27.8691	27.9253	28.0792	27.6074	28.0087	Q14AE4	WFDC3_MOUSE	Wfdc3	WAP four-disulfide core domain protein 3
Q19LI2	A1BG_MOUSE	A1bg	Alpha-1B-glycoprotein		0.0859967	0.147472	sp|Q19LI2|A1BG_MOUSE	17	17	17	39.1	39.1	39.1	56.553	0	323.31	7497100000	564	25.4315	26.6488	28.1375	28.5653	27.3003	27.2021	27.3639	27.5524	25.9201	27.3077	Q19LI2	A1BG_MOUSE	A1bg	Alpha-1B-glycoprotein
Q3TW96	UAP1L_MOUSE	Uap1l1	UDP-N-acetylhexosamine pyrophosphorylase-like protein 1		0.333063	-0.491383	sp|Q3TW96|UAP1L_MOUSE	9	9	8	20.7	20.7	18.1	56.613	0	44.22	102420000	52	22.1763	21.2548	21.1813	19.4929	21.8505	21.9172	21.6426	20.0952	22.7936	21.9642	Q3TW96	UAP1L_MOUSE	Uap1l1	UDP-N-acetylhexosamine pyrophosphorylase-like protein 1
Q3ULJ0	GPD1L_MOUSE	Gpd1l	Glycerol-3-phosphate dehydrogenase 1-like protein		0.0636215	0.0955547	sp|Q3ULJ0|GPD1L_MOUSE	9	8	8	26.8	23.6	23.6	38.225	0	28.929	177600000	62	22.8332	21.9541	22.1092	22.2581	22.5209	22.9986	20.2216	22.3414	22.8361	22.8001	Q3ULJ0	GPD1L_MOUSE	Gpd1l	Glycerol-3-phosphate dehydrogenase 1-like protein
Q571E4	GALNS_MOUSE	Galns	N-acetylgalactosamine-6-sulfatase		0.0980224	0.170139	sp|Q571E4|GALNS_MOUSE;tr|Q8CC47|Q8CC47_MOUSE	6	6	6	15	15	15	57.673	0.0021368	16.136	42592000	27	19.8647	21.7327	22.3711	18.9774	21.5017	20.3319	21.0748	20.7467	20.7216	20.7221	Q571E4	GALNS_MOUSE	Galns	N-acetylgalactosamine-6-sulfatase
Q5SWU9	ACACA_MOUSE	Acaca	Acetyl-CoA carboxylase 1		1.29062	1.29641	sp|Q5SWU9|ACACA_MOUSE	44	44	37	27.2	27.2	23	265.25	0	166.27	488330000	191	23.71	23.2348	22.9836	21.9363	24.0543	23.1129	21.1693	20.7304	22.5328	21.8915	Q5SWU9	ACACA_MOUSE	Acaca	Acetyl-CoA carboxylase 1
Q60590	A1AG1_MOUSE	Orm1	Alpha-1-acid glycoprotein 1		0.258025	0.255464	sp|Q60590|A1AG1_MOUSE	12	12	7	36.2	36.2	19.3	23.895	0	323.31	6841200000	908	27.6287	27.4735	28.5311	29.1191	27.7169	27.7832	28.5008	28.1967	26.9281	27.7833	Q60590	A1AG1_MOUSE	Orm1	Alpha-1-acid glycoprotein 1
Q60648	SAP3_MOUSE	Gm2a	Ganglioside GM2 activator		1.07419	0.670539	sp|Q60648|SAP3_MOUSE	9	9	9	42	42	42	20.824	0	286.03	908090000	229	24.908	24.9101	25.7971	25.3746	24.1722	24.1566	24.872	24.8417	23.9288	24.0102	Q60648	SAP3_MOUSE	Gm2a	Ganglioside GM2 activator
Q60864	STIP1_MOUSE	Stip1	Stress-induced-phosphoprotein 1		0.653757	0.766392	sp|Q60864|STIP1_MOUSE	6	6	6	16.4	16.4	16.4	62.581	0	23.762	55752000	24	21.1344	21.0144	21.0816	21.0655	21.8311	19.3465	21.5306	19.2922	21.9994	20.1262	Q60864	STIP1_MOUSE	Stip1	Stress-induced-phosphoprotein 1
Q61024	ASNS_MOUSE	Asns	Asparagine synthetase [glutamine-hydrolyzing]		0.0630221	-0.139755	sp|Q61024|ASNS_MOUSE	15	15	15	38.3	38.3	38.3	64.282	0	219.05	366900000	149	23.0883	21.8537	21.5518	21.3746	23.967	22.4063	22.1539	20.4643	24.1047	23.4048	Q61024	ASNS_MOUSE	Asns	Asparagine synthetase [glutamine-hydrolyzing]
Q61035	HARS1_MOUSE	Hars1	Histidine--tRNA ligase, cytoplasmic		0.18067	-0.281351	sp|Q61035|HARS1_MOUSE	8	8	8	17.1	17.1	17.1	57.432	0.0022523	18.945	54808000	29	21.4731	20.9372	19.3487	19.3208	21.3061	21.3137	19.8373	19.7673	21.512	21.3624	Q61035	HARS1_MOUSE	Hars1	Histidine--tRNA ligase, cytoplasmic
Q61112	CAB45_MOUSE	Sdf4	45 kDa calcium-binding protein		1.35985	1.20778	sp|Q61112|CAB45_MOUSE	6	6	6	20.2	20.2	20.2	42.064	0	86.174	124530000	45	21.9399	22.0808	22.4078	22.3526	21.3814	19.6676	21.1274	19.7875	21.5236	22.0175	Q61112	CAB45_MOUSE	Sdf4	45 kDa calcium-binding protein
Q61129	CFAI_MOUSE	Cfi	Complement factor I		0.169071	0.136184	sp|Q61129|CFAI_MOUSE	9	9	9	21.4	21.4	21.4	67.26	0	188.5	892390000	206	25.1816	25.7682	25.8104	26.1388	24.9203	25.5585	25.9738	25.7948	24.8625	24.9486	Q61129	CFAI_MOUSE	Cfi	Complement factor I
G3X9T8	G3X9T8_MOUSE	Cp	Ceruloplasmin		0.31209	0.174738	tr|G3X9T8|G3X9T8_MOUSE;sp|Q61147|CERU_MOUSE;tr|G3X8Q5|G3X8Q5_MOUSE;tr|E9PZD8|E9PZD8_MOUSE	40	40	40	46.2	46.2	46.2	121.08	0	323.31	6558600000	1308	26.271	26.9055	26.7627	26.7521	26.1497	26.5975	26.7345	26.5113	25.667	26.4571	G3X9T8	G3X9T8_MOUSE	Cp	Ceruloplasmin
Q61171	PRDX2_MOUSE	Prdx2	Peroxiredoxin-2		0.039036	-0.032299	sp|Q61171|PRDX2_MOUSE;tr|D3Z4A4|D3Z4A4_MOUSE	7	7	7	57.1	57.1	57.1	21.778	0	323.31	1084200000	179	24.7276	24.1041	24.2045	24.1822	24.9093	24.5662	24.4336	23.631	25.123	24.5355	Q61171	PRDX2_MOUSE	Prdx2	Peroxiredoxin-2
D3Z2X5	D3Z2X5_MOUSE	Pafah1b3	Platelet-activating factor acetylhydrolase IB subunit gamma (Fragment)		0.0850691	0.237359	tr|D3Z2X5|D3Z2X5_MOUSE;sp|Q61205|PA1B3_MOUSE;tr|Q8CA83|Q8CA83_MOUSE;tr|D3Z7E6|D3Z7E6_MOUSE	5	5	5	62.9	62.9	62.9	15.893	0	25.515	57274000	31	22.4002	20.0095	19.8922	22.5202	23.0783	22.5537	19.7958	19.1699	22.7202	22.474	D3Z2X5	D3Z2X5_MOUSE	Pafah1b3	Platelet-activating factor acetylhydrolase IB subunit gamma (Fragment)
A0A1L1SVK0	A0A1L1SVK0_MOUSE	Pafah1b2	Platelet-activating factor acetylhydrolase IB subunit beta (Fragment)		0.672468	-1.93064	tr|A0A1L1SVK0|A0A1L1SVK0_MOUSE;sp|Q61206|PA1B2_MOUSE;tr|A0A1L1SQ76|A0A1L1SQ76_MOUSE;tr|A0A1L1SRD0|A0A1L1SRD0_MOUSE;tr|A0A1L1SQV7|A0A1L1SQV7_MOUSE	3	3	3	28.9	28.9	28.9	22.056	0	74.16	65737000	30	24.0205	18.6681	19.6763	18.5304	24.0122	23.6499	23.5399	20.2174	23.7563	23.3972	A0A1L1SVK0	A0A1L1SVK0_MOUSE	Pafah1b2	Platelet-activating factor acetylhydrolase IB subunit beta (Fragment)
Q61247	A2AP_MOUSE	Serpinf2	Alpha-2-antiplasmin		0.02132	0.0122719	sp|Q61247|A2AP_MOUSE;tr|Q5ND35|Q5ND35_MOUSE	11	11	11	28.9	28.9	28.9	54.971	0	323.31	2370600000	338	26.4571	27.0509	26.7341	26.8554	26.5267	26.5466	26.717	27.1796	26.2013	26.9184	Q61247	A2AP_MOUSE	Serpinf2	Alpha-2-antiplasmin
Q61316	HSP74_MOUSE	Hspa4	Heat shock 70 kDa protein 4		0.071775	-0.15099	sp|Q61316|HSP74_MOUSE;tr|Q3U2G2|Q3U2G2_MOUSE	20	20	19	33.8	33.8	32.1	94.132	0	114.94	185780000	123	22.1839	21.491	20.2895	20.7751	23.0173	22.0617	21.2069	19.8426	23.4105	21.9898	Q61316	HSP74_MOUSE	Hspa4	Heat shock 70 kDa protein 4
D3Z0U9	D3Z0U9_MOUSE	Ecm1	Extracellular matrix protein 1 (Fragment)		0.0491733	-0.103537	tr|D3Z0U9|D3Z0U9_MOUSE;sp|Q61508|ECM1_MOUSE;tr|D3YV22|D3YV22_MOUSE;tr|D3Z038|D3Z038_MOUSE;tr|D3YV64|D3YV64_MOUSE;tr|F8WI14|F8WI14_MOUSE	5	5	5	31.5	31.5	31.5	28.347	0.002079	14.383	58304000	25	19.2515	21.707	21.7476	21.5794	20.9836	21.8663	22.4144	19.4537	20.1171	21.9352	D3Z0U9	D3Z0U9_MOUSE	Ecm1	Extracellular matrix protein 1 (Fragment)
Q61585	G0S2_MOUSE	G0s2	G0/G1 switch protein 2		1.52346	1.36077	sp|Q61585|G0S2_MOUSE	2	2	2	11.7	11.7	11.7	11.118	0.0016556	7.0496	74126000	26	21.5875	22.5011	22.5713	20.8036	21.9362	19.9082	19.9594	19.7591	21.7034	21.2658	Q61585	G0S2_MOUSE	G0s2	G0/G1 switch protein 2
Q61598	GDIB_MOUSE	Gdi2	Rab GDP dissociation inhibitor beta		0.619657	0.198894	sp|Q61598|GDIB_MOUSE	24	24	21	62.7	62.7	51.9	50.537	0	323.31	1572100000	476	25.7924	25.5211	25.4948	25.5414	26.0912	25.6398	25.159	25.3236	25.7401	25.584	Q61598	GDIB_MOUSE	Gdi2	Rab GDP dissociation inhibitor beta
Q61702	ITIH1_MOUSE	Itih1	Inter-alpha-trypsin inhibitor heavy chain H1		0.831325	-0.522182	sp|Q61702|ITIH1_MOUSE;tr|F8WJ05|F8WJ05_MOUSE	16	16	16	23.4	23.4	23.4	101.07	0	178.85	365950000	146	22.7875	23.3033	23.0971	23.5207	22.2497	23.525	23.9503	23.9055	22.6229	23.5656	Q61702	ITIH1_MOUSE	Itih1	Inter-alpha-trypsin inhibitor heavy chain H1
Q61703	ITIH2_MOUSE	Itih2	Inter-alpha-trypsin inhibitor heavy chain H2		0.0954904	0.0565529	sp|Q61703|ITIH2_MOUSE;tr|G3X977|G3X977_MOUSE;tr|Q3UEG7|Q3UEG7_MOUSE	11	11	11	17.5	17.5	17.5	105.93	0	323.31	1217100000	301	24.4306	24.8975	24.8425	24.911	24.3757	24.4514	24.9555	25.0941	24.0614	24.6122	Q61703	ITIH2_MOUSE	Itih2	Inter-alpha-trypsin inhibitor heavy chain H2
G3UY13	G3UY13_MOUSE	Il1rap	Interleukin-1 receptor accessory protein		0.345028	0.223573	tr|G3UY13|G3UY13_MOUSE;sp|Q61730|IL1AP_MOUSE;tr|E9Q6I2|E9Q6I2_MOUSE	4	4	4	10.1	10.1	10.1	39.881	0.0018215	9.2338	69302000	27	21.4645	21.8092	21.8628	21.8269	21.8169	20.5246	22.0954	21.705	21.4556	21.8819	G3UY13	G3UY13_MOUSE	Il1rap	Interleukin-1 receptor accessory protein
Q61753	SERA_MOUSE	Phgdh	D-3-phosphoglycerate dehydrogenase		0.528804	-0.326329	sp|Q61753|SERA_MOUSE	14	14	14	29.6	29.6	29.6	56.585	0	323.31	1008600000	202	23.85	23.4794	23.1598	22.9622	24.117	23.726	23.4702	23.497	24.5589	23.948	Q61753	SERA_MOUSE	Phgdh	D-3-phosphoglycerate dehydrogenase
Q61805	LBP_MOUSE	Lbp	Lipopolysaccharide-binding protein		2.41515	0.943214	sp|Q61805|LBP_MOUSE	9	9	9	22	22	22	53.055	0	150.18	656520000	169	24.8423	25.0973	25.1087	25.2323	24.3543	24.1777	24.0605	24.1936	23.2918	24.1951	Q61805	LBP_MOUSE	Lbp	Lipopolysaccharide-binding protein
Q61838	PZP_MOUSE	Pzp	Pregnancy zone protein		0.106216	0.0926331	sp|Q61838|PZP_MOUSE	40	40	40	37.4	37.4	37.4	165.85	0	323.31	3153800000	812	24.8531	25.7218	25.3434	25.4059	24.7597	25.2925	25.4761	25.5095	24.0561	25.2867	Q61838	PZP_MOUSE	Pzp	Pregnancy zone protein
Q62264	THRSP_MOUSE	Thrsp	Thyroid hormone-inducible hepatic protein		0.649898	-0.350988	sp|Q62264|THRSP_MOUSE	3	3	3	32.7	32.7	32.7	17.093	0	323.31	947040000	195	24.9346	24.9593	24.5536	24.6078	25.224	25.3853	24.4126	24.9809	25.7771	25.4784	Q62264	THRSP_MOUSE	Thrsp	Thyroid hormone-inducible hepatic protein
Q62348	TSN_MOUSE	Tsn	Translin		0.0921894	-0.256416	sp|Q62348|TSN_MOUSE	7	7	7	37.3	37.3	37.3	26.201	0	26.279	47324000	26	21.5183	20.5213	19.6511	20.4687	23.2426	22.3659	19.4437	19.2572	23.0439	22.5733	Q62348	TSN_MOUSE	Tsn	Translin
D3Z125	D3Z125_MOUSE	Tpd52	Tumor protein D52 (Fragment)		0.914626	-0.321779	tr|D3Z125|D3Z125_MOUSE;tr|E9PUA7|E9PUA7_MOUSE;tr|D3Z7X7|D3Z7X7_MOUSE;sp|Q62393|TPD52_MOUSE;tr|F8WHQ1|F8WHQ1_MOUSE;tr|D3Z637|D3Z637_MOUSE	3	3	3	30.7	30.7	30.7	19.417	0	21.341	160730000	51	22.4856	22.8829	22.3052	22.563	22.9947	23.247	22.5545	22.7745	23.2432	23.0212	D3Z125	D3Z125_MOUSE	Tpd52	Tumor protein D52 (Fragment)
Q62426	CYTB_MOUSE	Cstb	Cystatin-B		0.688532	-1.11472	sp|Q62426|CYTB_MOUSE	3	3	3	42.9	42.9	42.9	11.045	0	20.655	205060000	76	23.585	23.9886	19.9677	23.4634	24.2638	24.2201	23.6083	24.0403	24.8022	24.1713	Q62426	CYTB_MOUSE	Cstb	Cystatin-B
Q62433	NDRG1_MOUSE	Ndrg1	Protein NDRG1		0.208386	-0.146784	sp|Q62433|NDRG1_MOUSE	10	10	10	42.1	42.1	42.1	43.008	0	323.31	1438400000	303	25.2207	24.6968	24.7129	24.3401	25.641	24.9607	24.9927	24.5807	25.6154	25.1958	Q62433	NDRG1_MOUSE	Ndrg1	Protein NDRG1
Q62556	BT1A1_MOUSE	Btn1a1	Butyrophilin subfamily 1 member A1		0.278882	0.218222	sp|Q62556|BT1A1_MOUSE;tr|Q921X1|Q921X1_MOUSE	5	5	5	11.5	11.5	11.5	58.406	0	255.73	276570000	95	24.4801	24.8435	24.0736	23.4624	23.2134	23.5375	23.9512	24.1502	23.488	23.855	Q62556	BT1A1_MOUSE	Btn1a1	Butyrophilin subfamily 1 member A1
Q64285	CEL_MOUSE	Cel	Bile salt-activated lipase		0.317193	0.285279	sp|Q64285|CEL_MOUSE	27	27	27	53.1	53.1	53.1	65.812	0	323.31	13951000000	1801	27.1592	27.8781	28.5325	28.6452	27.5376	27.7261	28.3192	28.14	27.0328	27.1081	Q64285	CEL_MOUSE	Cel	Bile salt-activated lipase
Q64433	CH10_MOUSE	Hspe1	10 kDa heat shock protein, mitochondrial		0.382506	-0.636366	sp|Q64433|CH10_MOUSE;tr|Q9JI95|Q9JI95_MOUSE	4	4	4	40.2	40.2	40.2	10.963	0	53.637	234890000	88	24.0459	22.8079	19.9678	22.9204	23.5124	23.4598	23.2751	22.6339	23.9645	23.103	Q64433	CH10_MOUSE	Hspe1	10 kDa heat shock protein, mitochondrial
B1ASZ3	B1ASZ3_MOUSE	Gk	Glycerol kinase		0.827224	-0.499694	tr|B1ASZ3|B1ASZ3_MOUSE;sp|Q64516|GLPK_MOUSE	16	16	16	40.9	40.9	40.9	59.832	0	323.31	533240000	225	23.3831	23.0641	22.7927	22.1988	23.383	23.4663	22.9876	23.1652	24.2785	23.4227	B1ASZ3	B1ASZ3_MOUSE	Gk	Glycerol kinase
Q64674	SPEE_MOUSE	Srm	Spermidine synthase		0.197616	-0.133781	sp|Q64674|SPEE_MOUSE	14	14	14	62.6	62.6	62.6	33.995	0	323.31	1129000000	278	26.4255	25.6387	25.5409	25.4128	26.0875	26.0444	25.6783	25.3949	26.5201	26.1368	Q64674	SPEE_MOUSE	Srm	Spermidine synthase
Q64685	SIAT1_MOUSE	St6gal1	Beta-galactoside alpha-2,6-sialyltransferase 1		1.02282	1.06257	sp|Q64685|SIAT1_MOUSE	4	4	4	15.4	15.4	15.4	46.585	0	74.338	50113000	22	21.8129	21.5483	21.7301	22.1215	20.9552	21.0142	21.0825	18.7966	21.8773	20.0846	Q64685	SIAT1_MOUSE	St6gal1	Beta-galactoside alpha-2,6-sialyltransferase 1
Q64726	ZA2G_MOUSE	Azgp1	Zinc-alpha-2-glycoprotein		0.044891	0.0392075	sp|Q64726|ZA2G_MOUSE	10	10	10	39.1	39.1	39.1	35.332	0	269.57	489720000	180	23.062	23.8175	24.0046	23.7546	22.8142	23.2637	23.6292	24.0587	22.8371	23.4682	Q64726	ZA2G_MOUSE	Azgp1	Zinc-alpha-2-glycoprotein
Q5SXR6	Q5SXR6_MOUSE	Cltc	Clathrin heavy chain		0.385717	-0.74001	tr|Q5SXR6|Q5SXR6_MOUSE;sp|Q68FD5|CLH1_MOUSE	22	22	22	16.8	16.8	16.8	191.98	0	54.882	120530000	68	22.7039	21.6314	19.1095	19.5132	21.8603	21.4802	21.4278	20.1909	23.1136	22.3058	Q5SXR6	Q5SXR6_MOUSE	Cltc	Clathrin heavy chain
Q6JHY2	SMGC_MOUSE	Muc19	Submandibular gland protein C		2.08946	-2.2182	sp|Q6JHY2|SMGC_MOUSE;tr|F6VRN1|F6VRN1_MOUSE	9	9	9	34.8	34.8	34.8	74.382	0	108.74	49999000	19	19.8294	18.786	19.532	19.2812	19.8288	21.2371	21.5093	19.8752	23.5739	22.1529	Q6JHY2	SMGC_MOUSE	Muc19	Submandibular gland protein C
Q6PHU5	SORT_MOUSE	Sort1	Sortilin		1.10744	1.56068	sp|Q6PHU5|SORT_MOUSE	2	2	2	3	3	3	91.199	0.0042674	4.8082	43342000	21	19.7575	22.9992	19.7729	22.6406	22.4919	19.9132	19.2827	19.8977	20.9182	19.847	Q6PHU5	SORT_MOUSE	Sort1	Sortilin
Q76MZ3	2AAA_MOUSE	Ppp2r1a	Serine/threonine-protein phosphatase 2A 65 kDa regulatory subunit A alpha isoform		0.082682	0.167843	sp|Q76MZ3|2AAA_MOUSE;tr|H3BLQ0|H3BLQ0_MOUSE;sp|Q7TNP2|2AAB_MOUSE;tr|Q3TTF6|Q3TTF6_MOUSE;tr|H3BKU1|H3BKU1_MOUSE;tr|G3UWS4|G3UWS4_MOUSE	4	4	4	11	11	11	65.322	0.002	12.234	86190000	27	22.324	21.3273	19.8356	21.1385	22.7451	21.8868	19.6776	20.4342	22.6209	21.9117	Q76MZ3	2AAA_MOUSE	Ppp2r1a	Serine/threonine-protein phosphatase 2A 65 kDa regulatory subunit A alpha isoform
Q7TQI3	OTUB1_MOUSE	Otub1	Ubiquitin thioesterase OTUB1		0.262055	-0.583219	sp|Q7TQI3|OTUB1_MOUSE;tr|D3YWF6|D3YWF6_MOUSE;tr|D3Z7K0|D3Z7K0_MOUSE	3	3	3	17.7	17.7	17.7	31.27	0	21.447	54758000	22	22.8098	19.527	21.7845	18.6031	21.6944	22.6346	21.1369	21.3858	22.3566	19.821	Q7TQI3	OTUB1_MOUSE	Otub1	Ubiquitin thioesterase OTUB1
Q7TSG5	SH321_MOUSE	Sh3d21	SH3 domain-containing protein 21		0.401802	-0.298352	sp|Q7TSG5|SH321_MOUSE;tr|Z4YK11|Z4YK11_MOUSE	2	2	2	3.5	3.5	3.5	60.323	0	47.951	29355000000	601	28.1392	28.7489	29.1067	29.8549	29.4042	29.2512	28.7982	29.6007	29.3662	29.7294	Q7TSG5	SH321_MOUSE	Sh3d21	SH3 domain-containing protein 21
Q80YC5	FA12_MOUSE	F12	Coagulation factor XII		0.509084	-0.302359	sp|Q80YC5|FA12_MOUSE	7	7	7	14.6	14.6	14.6	65.701	0	60.51	291480000	141	23.5157	24.1097	24.3636	24.242	23.6446	23.9822	24.4146	25.0078	23.6827	24.3001	Q80YC5	FA12_MOUSE	F12	Coagulation factor XII
E9QN14	E9QN14_MOUSE	Srgap3	SLIT-ROBO Rho GTPase-activating protein 3		0.671143	3.73584	tr|E9QN14|E9QN14_MOUSE;tr|F8VPQ4|F8VPQ4_MOUSE;sp|Q812A2|SRGP3_MOUSE	1	1	1	2	2	2	121.72	0.008872	3.613	25477000000	80	30.2618	29.7655	30.5986	30.9405	27.4421	29.973	30.9847	30.4023	19.4063	19.5629	E9QN14	E9QN14_MOUSE	Srgap3	SLIT-ROBO Rho GTPase-activating protein 3
D3Z7F7	D3Z7F7_MOUSE	Cpped1	Serine/threonine-protein phosphatase CPPED1 (Fragment)		0.457525	-0.519748	tr|D3Z7F7|D3Z7F7_MOUSE;sp|Q8BFS6|CPPED_MOUSE	2	2	2	9.2	9.2	9.2	27.215	0.001634	6.8997	33728000	16	21.0952	19.1576	18.6719	20.1144	20.85	21.0108	20.1958	19.9272	21.0663	20.2876	D3Z7F7	D3Z7F7_MOUSE	Cpped1	Serine/threonine-protein phosphatase CPPED1 (Fragment)
Q8BGQ7	SYAC_MOUSE	Aars1	Alanine--tRNA ligase, cytoplasmic		0.0069793	-0.00819817	sp|Q8BGQ7|SYAC_MOUSE	10	10	10	13.8	13.8	13.8	106.91	0	53.073	73691000	58	20.8896	20.5293	20.0422	20.1116	21.2303	20.7087	19.8484	19.979	21.6849	20.6229	Q8BGQ7	SYAC_MOUSE	Aars1	Alanine--tRNA ligase, cytoplasmic
Q8BKC5	IPO5_MOUSE	Ipo5	Importin-5		0.428288	-0.643641	sp|Q8BKC5|IPO5_MOUSE	8	8	8	10.8	10.8	10.8	123.59	0.0022936	20.061	39580000	21	22.0551	20.2045	19.0327	21.8782	22.0799	21.6324	20.6161	21.777	22.3545	22.0886	Q8BKC5	IPO5_MOUSE	Ipo5	Importin-5
D3Z158	D3Z158_MOUSE	Qars	Glutaminyl-tRNA synthetase		0.256163	-0.435603	tr|D3Z158|D3Z158_MOUSE;sp|Q8BML9|SYQ_MOUSE	8	8	8	14.6	14.6	14.6	85.054	0.0022624	19.366	49969000	31	21.6723	20.9861	19.7603	19.4145	21.9419	21.6736	21.5964	19.2768	22.0868	21.3196	D3Z158	D3Z158_MOUSE	Qars	Glutaminyl-tRNA synthetase
Q8BND5	QSOX1_MOUSE	Qsox1	Sulfhydryl oxidase 1		0.094652	-0.0404812	sp|Q8BND5|QSOX1_MOUSE	52	52	52	58.3	58.3	58.3	82.784	0	323.31	117440000000	7124	30.4478	30.5925	30.583	30.2142	29.9331	30.182	30.5421	30.5806	30.1403	30.528	Q8BND5	QSOX1_MOUSE	Qsox1	Sulfhydryl oxidase 1
A0A498WGK2	A0A498WGK2_MOUSE	Nars	Asparagine--tRNA ligase		0.468541	-0.854094	tr|A0A498WGK2|A0A498WGK2_MOUSE;sp|Q8BP47|SYNC_MOUSE;tr|A0A494BB89|A0A494BB89_MOUSE;tr|A0A494BAX5|A0A494BAX5_MOUSE	13	13	13	25.3	25.3	25.3	64.208	0	276.98	169110000	70	22.8481	21.9517	19.481	20.2179	23.094	22.5199	21.7959	21.0511	23.6068	22.8896	A0A498WGK2	A0A498WGK2_MOUSE	Nars	Asparagine--tRNA ligase
Q8BTZ7	GMPPB_MOUSE	Gmppb	Mannose-1-phosphate guanyltransferase beta		0.375246	-0.364602	sp|Q8BTZ7|GMPPB_MOUSE	6	6	6	23.3	23.3	23.3	39.916	0	32.915	67347000	45	20.578	22.0497	21.7785	21.1954	22.0418	21.8616	21.9764	20.7349	22.7008	22.1927	Q8BTZ7	GMPPB_MOUSE	Gmppb	Mannose-1-phosphate guanyltransferase beta
D3YWR7	D3YWR7_MOUSE	Qdpr	Dihydropteridine reductase		0.326271	-0.545957	tr|D3YWR7|D3YWR7_MOUSE;sp|Q8BVI4|DHPR_MOUSE;tr|A0A0G2JGJ1|A0A0G2JGJ1_MOUSE;tr|A0A0G2JGY0|A0A0G2JGY0_MOUSE;tr|D3Z1A1|D3Z1A1_MOUSE	6	6	6	52.9	52.9	52.9	20.008	0	58.76	66376000	44	21.5386	20.2523	20.539	18.9428	21.7103	21.8744	19.8768	19.8523	22.0807	22.0286	D3YWR7	D3YWR7_MOUSE	Qdpr	Dihydropteridine reductase
Q8C6Z1	MUC15_MOUSE	Muc15	Mucin-15		0.213124	0.410012	sp|Q8C6Z1|MUC15_MOUSE	2	2	2	3.6	3.6	3.6	36.382	0.0041152	4.442	73926000	8	19.5269	22.0145	22.6639	22.555	19.771	20.5154	21.2565	21.9656	20.9588	19.785	Q8C6Z1	MUC15_MOUSE	Muc15	Mucin-15
Q8CAY6	THIC_MOUSE	Acat2	Acetyl-CoA acetyltransferase, cytosolic		0.10091	-0.0953125	sp|Q8CAY6|THIC_MOUSE;tr|A0A3B2WAL8|A0A3B2WAL8_MOUSE;tr|G3XA25|G3XA25_MOUSE;tr|Q80X81|Q80X81_MOUSE	8	8	8	40.6	40.6	40.6	41.297	0	170.11	384980000	209	24.0968	23.0794	23.4013	23.3184	24.517	23.8251	23.5163	23.162	24.5259	23.8599	Q8CAY6	THIC_MOUSE	Acat2	Acetyl-CoA acetyltransferase, cytosolic
Q8CDN6	TXNL1_MOUSE	Txnl1	Thioredoxin-like protein 1		0.0242535	0.0649178	sp|Q8CDN6|TXNL1_MOUSE;tr|A0A498WGD8|A0A498WGD8_MOUSE;tr|A0A494BBI1|A0A494BBI1_MOUSE;tr|A0A494B955|A0A494B955_MOUSE	6	6	6	28	28	28	32.237	0.0022075	17.491	47781000	25	22.3105	22.0818	19.2023	19.4824	22.7567	20.1723	21.5963	21.4789	22.6201	19.6416	Q8CDN6	TXNL1_MOUSE	Txnl1	Thioredoxin-like protein 1
Q8CHP8	PGP_MOUSE	Pgp	Glycerol-3-phosphate phosphatase		0.334639	-0.226147	sp|Q8CHP8|PGP_MOUSE	8	8	8	31.2	31.2	31.2	34.54	0	323.31	474430000	164	24.2373	23.8892	23.6726	23.2456	24.2962	24.4102	23.5368	23.6147	24.6465	24.2635	Q8CHP8	PGP_MOUSE	Pgp	Glycerol-3-phosphate phosphatase
Q8CI94	PYGB_MOUSE	Pygb	Glycogen phosphorylase, brain form		0.866593	-1.49156	sp|Q8CI94|PYGB_MOUSE	15	15	14	22.2	22.2	20.8	96.729	0	55.566	105820000	54	22.4178	18.8646	19.6456	19.8679	22.7123	22.1216	21.0936	21.4566	23.6171	22.677	Q8CI94	PYGB_MOUSE	Pygb	Glycogen phosphorylase, brain form
Q8K0E8	FIBB_MOUSE	Fgb	Fibrinogen beta chain		0.312306	0.812156	sp|Q8K0E8|FIBB_MOUSE	15	15	14	38.7	38.7	36.6	54.752	0	323.31	591250000	137	23.9146	25.2538	25.9725	25.8823	24.3671	25.4246	26.1715	26.1829	21.2865	22.2641	Q8K0E8	FIBB_MOUSE	Fgb	Fibrinogen beta chain
Q8K183	PDXK_MOUSE	Pdxk	Pyridoxal kinase		0.147201	0.0916954	sp|Q8K183|PDXK_MOUSE	10	10	10	41.7	41.7	41.7	35.015	0	323.31	1385900000	307	26.1808	25.7165	25.7378	25.447	26.4599	25.9981	25.7505	25.5209	26.3284	25.4856	Q8K183	PDXK_MOUSE	Pdxk	Pyridoxal kinase
D3YYK0	D3YYK0_MOUSE	Abhd11	Protein ABHD11		0.0697443	-0.13957	tr|D3YYK0|D3YYK0_MOUSE;sp|Q8K4F5|ABHDB_MOUSE	2	2	2	11.5	11.5	11.5	24.881	0.0029326	5.1136	41318000	11	21.8988	20.2323	20.3987	19.0009	21.7543	20.3599	20.7424	22.4851	20.8844	19.5111	D3YYK0	D3YYK0_MOUSE	Abhd11	Protein ABHD11
Q8QZS1	HIBCH_MOUSE	Hibch	3-hydroxyisobutyryl-CoA hydrolase, mitochondrial		0.270671	-0.253646	sp|Q8QZS1|HIBCH_MOUSE;tr|E0CX19|E0CX19_MOUSE	4	4	4	14.8	14.8	14.8	43.037	0.0022472	18.808	55539000	20	21.3935	20.2716	20.2916	19.9415	20.626	20.8062	19.6881	20.7034	21.5498	21.0449	Q8QZS1	HIBCH_MOUSE	Hibch	3-hydroxyisobutyryl-CoA hydrolase, mitochondrial
Q8R059	GALE_MOUSE	Gale	UDP-glucose 4-epimerase		0.244801	-0.254557	sp|Q8R059|GALE_MOUSE	9	9	9	39.8	39.8	39.8	38.224	0	323.31	412270000	106	24.2936	23.4846	22.8251	22.8998	24.4296	24.1116	23.4187	23.106	24.6153	23.9538	Q8R059	GALE_MOUSE	Gale	UDP-glucose 4-epimerase
Q8R197	SAST_MOUSE	Olah	S-acyl fatty acid synthase thioesterase, medium chain		0.803566	-0.607053	sp|Q8R197|SAST_MOUSE	14	14	14	56.2	56.2	56.2	30.25	0	323.31	2976600000	644	26.1079	25.285	25.1291	24.7926	26.4455	26.2795	25.5795	25.7009	26.8526	26.3829	Q8R197	SAST_MOUSE	Olah	S-acyl fatty acid synthase thioesterase, medium chain
Q8R317	UBQL1_MOUSE	Ubqln1	Ubiquilin-1		0.00460522	-0.00933418	sp|Q8R317|UBQL1_MOUSE	3	3	3	8.1	8.1	8.1	61.976	0.0017123	7.6448	27877000	19	21.0518	20.7093	20.1433	18.387	21.2027	20.9251	20.044	18.8056	20.2637	21.5023	Q8R317	UBQL1_MOUSE	Ubqln1	Ubiquilin-1
Q8VCM7	FIBG_MOUSE	Fgg	Fibrinogen gamma chain		0.0139695	0.0432148	sp|Q8VCM7|FIBG_MOUSE;tr|Q3UER8|Q3UER8_MOUSE	11	11	11	33.9	33.9	33.9	49.391	0	323.31	463200000	134	21.4329	23.9267	24.3339	24.223	22.9129	24.2883	24.9502	24.9949	20.5265	21.8533	Q8VCM7	FIBG_MOUSE	Fgg	Fibrinogen gamma chain
Q8VE47	UBA5_MOUSE	Uba5	Ubiquitin-like modifier-activating enzyme 5		0.100858	-0.255408	sp|Q8VE47|UBA5_MOUSE	5	5	5	23.3	23.3	23.3	44.789	0	29.188	50454000	43	22.7262	19.4753	21.0864	20.3403	22.7103	22.2276	19.2847	20.6192	22.9284	22.5556	Q8VE47	UBA5_MOUSE	Uba5	Ubiquitin-like modifier-activating enzyme 5
Q8VEN2	PLET1_MOUSE	Plet1	Placenta-expressed transcript 1 protein		0.478635	0.236211	sp|Q8VEN2|PLET1_MOUSE	2	2	2	7.6	7.6	7.6	25.006	0	323.31	254640000	54	23.3644	23.1361	23.1838	22.8596	22.5284	23.0732	22.6343	22.1742	22.853	23.1565	Q8VEN2	PLET1_MOUSE	Plet1	Placenta-expressed transcript 1 protein
Q91V64	ISOC1_MOUSE	Isoc1	Isochorismatase domain-containing protein 1		0.248761	-0.44962	sp|Q91V64|ISOC1_MOUSE;tr|A0A494B952|A0A494B952_MOUSE	5	5	5	23.6	23.6	23.6	32.032	0	24.041	55855000	28	22.008	19.4399	20.3125	20.4338	22.0407	21.5567	19.3287	21.1505	22.5936	21.8535	Q91V64	ISOC1_MOUSE	Isoc1	Isochorismatase domain-containing protein 1
A2A7S7	A2A7S7_MOUSE	Yars	Tyrosine--tRNA ligase		0.0714753	-0.137677	tr|A2A7S7|A2A7S7_MOUSE;sp|Q91WQ3|SYYC_MOUSE	8	8	8	15.2	15.2	15.2	63.001	0.0022321	18.511	62622000	30	21.2416	20.3257	21.1938	18.6526	21.8942	21.3723	19.8236	19.7616	21.6252	21.4136	A2A7S7	A2A7S7_MOUSE	Yars	Tyrosine--tRNA ligase
A2AC16	A2AC16_MOUSE	Dcxr	L-xylulose reductase		0.0982639	-0.137809	tr|A2AC16|A2AC16_MOUSE;sp|Q91X52|DCXR_MOUSE	4	4	4	20.8	20.8	20.8	24.99	0.0022371	18.514	61792000	42	21.0589	20.704	20.35	20.2161	21.1935	21.3632	19.2589	20.2139	21.8689	21.5067	A2AC16	A2AC16_MOUSE	Dcxr	L-xylulose reductase
Q91X72	HEMO_MOUSE	Hpx	Hemopexin		0.209324	0.152729	sp|Q91X72|HEMO_MOUSE	27	27	21	58.9	58.9	51.5	51.317	0	323.31	22520000000	2372	27.4356	28.6403	28.2753	28.6007	27.847	28.1855	27.896	28.524	27.4097	28.02	Q91X72	HEMO_MOUSE	Hpx	Hemopexin
Q91XA2	GOLM1_MOUSE	Golm1	Golgi membrane protein 1		0.408227	0.757778	sp|Q91XA2|GOLM1_MOUSE	4	4	4	13.5	13.5	13.5	44.326	0	40.512	65498000	23	22.1842	22.1359	19.4286	22.2883	22.3499	20.5785	18.9274	22.4924	21.9106	20.6891	Q91XA2	GOLM1_MOUSE	Golm1	Golgi membrane protein 1
Q91YI0	ARLY_MOUSE	Asl	Argininosuccinate lyase		0.206982	-0.53558	sp|Q91YI0|ARLY_MOUSE;tr|E0CY49|E0CY49_MOUSE	5	5	5	14.2	14.2	14.2	51.739	0	25.029	56583000	20	21.6436	21.5289	17.6614	18.2462	21.7385	21.7344	21.1292	20.2233	21.4775	18.9322	Q91YI0	ARLY_MOUSE	Asl	Argininosuccinate lyase
Q91Z53	GRHPR_MOUSE	Grhpr	Glyoxylate reductase/hydroxypyruvate reductase		0.945923	-1.46229	sp|Q91Z53|GRHPR_MOUSE;tr|D6REG4|D6REG4_MOUSE;tr|B1AXQ0|B1AXQ0_MOUSE	6	6	6	24.4	24.4	24.4	35.328	0	23.263	118600000	51	23.1749	18.8873	22.1548	22.1805	20.0208	23.0097	22.0371	22.4705	23.3707	22.842	Q91Z53	GRHPR_MOUSE	Grhpr	Glyoxylate reductase/hydroxypyruvate reductase
Q91ZJ5	UGPA_MOUSE	Ugp2	UTP--glucose-1-phosphate uridylyltransferase		0.197069	0.172335	sp|Q91ZJ5|UGPA_MOUSE	6	6	6	15.2	15.2	15.2	56.979	0	157.1	209630000	70	22.6818	21.7078	21.5404	21.5253	22.2916	22.1945	21.8207	20.7788	22.2291	21.8621	Q91ZJ5	UGPA_MOUSE	Ugp2	UTP--glucose-1-phosphate uridylyltransferase
Q920E5	FPPS_MOUSE	Fdps	Farnesyl pyrophosphate synthase		0.135883	0.364014	sp|Q920E5|FPPS_MOUSE;tr|A0A0G2JEA5|A0A0G2JEA5_MOUSE;tr|A0A0G2JDJ5|A0A0G2JDJ5_MOUSE;tr|A0A0G2JEB3|A0A0G2JEB3_MOUSE	6	6	6	22.4	22.4	22.4	40.581	0	52.134	168990000	59	22.6936	22.8699	19.594	22.068	23.6187	22.8351	21.2091	19.0909	22.7581	23.1309	Q920E5	FPPS_MOUSE	Fdps	Farnesyl pyrophosphate synthase
Q921I1	TRFE_MOUSE	Tf	Serotransferrin		1.32507	-0.416162	sp|Q921I1|TRFE_MOUSE	71	71	49	73.5	73.5	46.8	76.723	0	323.31	2378500000000	48830	33.0956	33.4735	33.696	33.3078	33.1287	33.6461	33.9681	34.0753	33.2866	33.8064	Q921I1	TRFE_MOUSE	Tf	Serotransferrin
Q922D8	C1TC_MOUSE	Mthfd1	C-1-tetrahydrofolate synthase, cytoplasmic		0.678789	-1.07582	sp|Q922D8|C1TC_MOUSE;tr|A0A1W2P733|A0A1W2P733_MOUSE	12	12	12	18.2	18.2	18.2	101.2	0	25.696	57288000	42	20.7057	20.7341	20.391	17.7074	21.5905	21.2235	20.961	21.1465	22.8921	20.2849	Q922D8	C1TC_MOUSE	Mthfd1	C-1-tetrahydrofolate synthase, cytoplasmic
A0A0U1RPU7	A0A0U1RPU7_MOUSE	Blvrb	Flavin reductase (NADPH)		0.457242	-1.13614	tr|A0A0U1RPU7|A0A0U1RPU7_MOUSE;sp|Q923D2|BLVRB_MOUSE;tr|E9PZC3|E9PZC3_MOUSE	4	4	4	40.5	40.5	40.5	12.868	0	68.272	67360000	26	22.4871	18.4277	19.1346	19.3066	22.5053	22.771	19.9543	19.5216	22.8224	22.4727	A0A0U1RPU7	A0A0U1RPU7_MOUSE	Blvrb	Flavin reductase (NADPH)
Q924M7	MPI_MOUSE	Mpi	Mannose-6-phosphate isomerase		0.104796	-0.153381	sp|Q924M7|MPI_MOUSE	5	5	5	18.7	18.7	18.7	46.575	0	103.27	41971000	33	22.1586	21.281	20.105	20.0092	21.9614	21.7861	20.5212	20.5574	21.9835	21.4341	Q924M7	MPI_MOUSE	Mpi	Mannose-6-phosphate isomerase
Q93092	TALDO_MOUSE	Taldo1	Transaldolase		1.22463	-0.790507	sp|Q93092|TALDO_MOUSE;tr|A0A1B0GR11|A0A1B0GR11_MOUSE	11	11	11	30.6	30.6	30.6	37.387	0	38.172	310780000	99	22.4185	22.6425	22.3704	23.2568	22.6936	24.5908	23.2816	23.0355	23.7069	22.7195	Q93092	TALDO_MOUSE	Taldo1	Transaldolase
Q99J77	SIAS_MOUSE	Nans	Sialic acid synthase		0.962539	-0.5211	sp|Q99J77|SIAS_MOUSE	9	9	9	37	37	37	40.024	0	323.31	1133100000	316	24.7386	23.9229	23.5636	23.6684	24.5934	24.9118	24.3545	24.177	25.0221	24.6269	Q99J77	SIAS_MOUSE	Nans	Sialic acid synthase
Q99K85	SERC_MOUSE	Psat1	Phosphoserine aminotransferase		0.0102595	-0.0155449	sp|Q99K85|SERC_MOUSE;tr|Q3U6K9|Q3U6K9_MOUSE;tr|E9Q6P1|E9Q6P1_MOUSE	4	4	4	15.7	15.7	15.7	40.472	0.0021552	16.337	15431000	11	20.1626	19.1529	20.09	19.6274	21.1563	19.2583	20.7292	19.1431	21.1308	20.0057	Q99K85	SERC_MOUSE	Psat1	Phosphoserine aminotransferase
Q99KI0	ACON_MOUSE	Aco2	Aconitate hydratase, mitochondrial		0.370949	-0.384591	sp|Q99KI0|ACON_MOUSE	24	24	24	45.1	45.1	45.1	85.462	0	323.31	1126100000	347	24.3231	22.4218	22.7175	22.1226	23.7081	23.7878	23.3842	22.8906	23.9749	23.1785	Q99KI0	ACON_MOUSE	Aco2	Aconitate hydratase, mitochondrial
Q99KK7	DPP3_MOUSE	Dpp3	Dipeptidyl peptidase 3		0.135462	-0.27245	sp|Q99KK7|DPP3_MOUSE;tr|A0A494BBC1|A0A494BBC1_MOUSE	11	11	11	23.6	23.6	23.6	82.897	0	124.67	94389000	52	21.4669	20.5052	19.7377	19.9063	22.3641	21.5516	20.4677	19.0816	22.3889	21.8528	Q99KK7	DPP3_MOUSE	Dpp3	Dipeptidyl peptidase 3
Q99KQ4	NAMPT_MOUSE	Nampt	Nicotinamide phosphoribosyltransferase		0.0257094	-0.028698	sp|Q99KQ4|NAMPT_MOUSE	11	11	11	30.5	30.5	30.5	55.446	0	268.67	391980000	136	23.2626	22.9443	22.1778	22.2314	22.888	23.0225	22.6281	21.6687	23.6503	22.6779	Q99KQ4	NAMPT_MOUSE	Nampt	Nicotinamide phosphoribosyltransferase
Q99KR3	LACB2_MOUSE	Lactb2	Endoribonuclease LACTB2		0.110391	-0.133043	sp|Q99KR3|LACB2_MOUSE	2	2	2	9.4	9.4	9.4	32.754	0.0029499	5.1248	35008000	17	21.2317	21.0243	20.4484	20.2197	20.9843	21.2093	20.0689	19.8997	22.0729	21.3228	Q99KR3	LACB2_MOUSE	Lactb2	Endoribonuclease LACTB2
F8WJK8	F8WJK8_MOUSE	St13	Hsc70-interacting protein		0.436102	-0.728497	tr|F8WJK8|F8WJK8_MOUSE;sp|Q99L47|F10A1_MOUSE	5	5	5	17.1	17.1	17.1	40.538	0	41.756	105160000	31	22.0231	20.8198	19.5197	21.5577	19.6033	22.3883	20.2323	19.8677	22.4709	22.2069	F8WJK8	F8WJK8_MOUSE	St13	Hsc70-interacting protein
Q99LC5	ETFA_MOUSE	Etfa	Electron transfer flavoprotein subunit alpha, mitochondrial		0.397706	0.333837	sp|Q99LC5|ETFA_MOUSE	8	8	8	34.8	34.8	34.8	35.009	0	31.024	1445600000	103	26.081	24.3702	24.758	24.9421	25.7355	25.1434	25.0204	24.0896	25.1881	24.7761	Q99LC5	ETFA_MOUSE	Etfa	Electron transfer flavoprotein subunit alpha, mitochondrial
A2A815	A2A815_MOUSE	Park7	Maillard deglycase (Fragment)		0.42933	0.636198	tr|A2A815|A2A815_MOUSE;tr|A2A813|A2A813_MOUSE;sp|Q99LX0|PARK7_MOUSE;tr|A2A817|A2A817_MOUSE;tr|A2A816|A2A816_MOUSE	6	6	6	75.6	75.6	75.6	14.243	0	198.57	361710000	105	24.5787	23.8245	23.673	23.7948	24.3487	24.2353	20.9613	23.2072	24.4964	24.1385	A2A815	A2A815_MOUSE	Park7	Maillard deglycase (Fragment)
Q99NB1	ACS2L_MOUSE	Acss1	Acetyl-coenzyme A synthetase 2-like, mitochondrial		0.276134	-0.758401	sp|Q99NB1|ACS2L_MOUSE	13	13	13	29	29	29	74.622	0	128.34	206850000	79	24.3919	20.4319	19.9926	18.9161	23.4316	22.5324	22.1305	20.5834	23.5204	22.1893	Q99NB1	ACS2L_MOUSE	Acss1	Acetyl-coenzyme A synthetase 2-like, mitochondrial
Q99PT1	GDIR1_MOUSE	Arhgdia	Rho GDP-dissociation inhibitor 1		0.153908	0.108122	sp|Q99PT1|GDIR1_MOUSE	7	7	7	56.9	56.9	56.9	23.407	0	323.31	309150000	110	23.7296	22.919	23.157	22.9695	24.0496	23.4059	23.0524	22.794	23.702	23.3299	Q99PT1	GDIR1_MOUSE	Arhgdia	Rho GDP-dissociation inhibitor 1
Q9CPU0	LGUL_MOUSE	Glo1	Lactoylglutathione lyase		1.59123	-2.0024	sp|Q9CPU0|LGUL_MOUSE;tr|A0A494BAF7|A0A494BAF7_MOUSE;tr|A0A494BBE7|A0A494BBE7_MOUSE	4	4	4	34.2	34.2	34.2	20.809	0.0018553	9.9429	37935000	31	20.6622	18.7916	21.3243	20.7213	19.2238	22.7309	22.1059	20.0521	23.1586	22.6876	Q9CPU0	LGUL_MOUSE	Glo1	Lactoylglutathione lyase
E9Q197	E9Q197_MOUSE	Glod4	Glyoxalase domain-containing protein 4		0.314875	1.10876	tr|E9Q197|E9Q197_MOUSE;sp|Q9CPV4|GLOD4_MOUSE;tr|F6ZTG3|F6ZTG3_MOUSE	5	5	5	22.2	22.2	22.2	31.207	0	39.03	88690000	27	24.3563	23.0818	19.5557	18.4856	23.0917	18.6854	21.5845	20.8197	23.7018	18.2359	E9Q197	E9Q197_MOUSE	Glod4	Glyoxalase domain-containing protein 4
Q9CPX6	ATG3_MOUSE	Atg3	Ubiquitin-like-conjugating enzyme ATG3		0.474649	0.494726	sp|Q9CPX6|ATG3_MOUSE	4	4	4	18.2	18.2	18.2	35.796	0	24.08	28008000	20	21.464	20.2987	20.3579	21.2819	21.0361	21.0329	19.7909	19.0312	20.9635	21.1464	Q9CPX6	ATG3_MOUSE	Atg3	Ubiquitin-like-conjugating enzyme ATG3
Q9CPY7	AMPL_MOUSE	Lap3	Cytosol aminopeptidase		0.67428	-0.806862	sp|Q9CPY7|AMPL_MOUSE	8	8	8	21.6	21.6	21.6	56.141	0.0022676	19.506	70247000	34	21.3319	21.7811	20.7544	19.728	23.1702	22.0889	21.7053	21.9056	22.5324	22.5679	Q9CPY7	AMPL_MOUSE	Lap3	Cytosol aminopeptidase
Q9CQ60	6PGL_MOUSE	Pgls	6-phosphogluconolactonase		0.871275	-0.385959	sp|Q9CQ60|6PGL_MOUSE;tr|Q8CBG6|Q8CBG6_MOUSE;tr|F6X8L5|F6X8L5_MOUSE	9	9	9	58.8	58.8	58.8	27.254	0	97.657	418750000	136	23.4433	22.7449	22.8271	22.6968	23.4898	23.6605	23.2466	22.9859	23.8475	23.3914	Q9CQ60	6PGL_MOUSE	Pgls	6-phosphogluconolactonase
Q9CQ86	MIEN1_MOUSE	Mien1	Migration and invasion enhancer 1		0.343492	0.531642	sp|Q9CQ86|MIEN1_MOUSE	2	2	2	24.3	24.3	24.3	12.295	0.0028818	4.952	36042000	10	22.0436	22.0136	18.9365	21.2246	20.9169	19.4931	20.3457	20.9346	21.6271	20.0765	Q9CQ86	MIEN1_MOUSE	Mien1	Migration and invasion enhancer 1
Q9CQM5	TXD17_MOUSE	Txndc17	Thioredoxin domain-containing protein 17		0.510034	1.55697	sp|Q9CQM5|TXD17_MOUSE	2	2	2	18.7	18.7	18.7	14.015	0.0022272	18.233	58849000	18	23.9517	19.5745	23.0487	19.4474	23.6209	19.7258	18.6083	19.0504	24.3521	20.1218	Q9CQM5	TXD17_MOUSE	Txndc17	Thioredoxin domain-containing protein 17
Q9CQM9	GLRX3_MOUSE	Glrx3	Glutaredoxin-3		0.883501	0.994143	sp|Q9CQM9|GLRX3_MOUSE;tr|A0A1B0GS58|A0A1B0GS58_MOUSE;tr|A0A1B0GT04|A0A1B0GT04_MOUSE	5	5	5	25.2	25.2	25.2	37.778	0	22.947	50948000	22	21.6269	21.4866	20.6497	19.7556	22.2494	19.5845	20.4961	20.6757	21.1343	18.9068	Q9CQM9	GLRX3_MOUSE	Glrx3	Glutaredoxin-3
Q9CR09	UFC1_MOUSE	Ufc1	Ubiquitin-fold modifier-conjugating enzyme 1		0.00555795	0.0226349	sp|Q9CR09|UFC1_MOUSE;tr|M0QWS4|M0QWS4_MOUSE	3	3	3	19.2	19.2	19.2	19.481	0.0016502	6.9959	103050000	31	20.2152	23.5921	19.0517	23.3059	24.3469	24.1157	19.9768	21.1415	24.3675	20.7971	Q9CR09	UFC1_MOUSE	Ufc1	Ubiquitin-fold modifier-conjugating enzyme 1
Q9CWJ9	PUR9_MOUSE	Atic	Bifunctional purine biosynthesis protein ATIC		0.038533	-0.0571476	sp|Q9CWJ9|PUR9_MOUSE	20	20	20	44.8	44.8	44.8	64.217	0	93.035	242650000	129	23.0533	22.0447	21.5162	21.7477	22.9421	22.3776	21.3045	21.5045	23.5055	22.8976	Q9CWJ9	PUR9_MOUSE	Atic	Bifunctional purine biosynthesis protein ATIC
Q9CWS0	DDAH1_MOUSE	Ddah1	N(G),N(G)-dimethylarginine dimethylaminohydrolase 1		0.198248	0.138432	sp|Q9CWS0|DDAH1_MOUSE;tr|D3YU15|D3YU15_MOUSE	7	7	7	30.9	30.9	30.9	31.381	0	107.8	465340000	92	24.3253	23.5793	23.5889	24.1148	24.4694	23.9728	24.3344	23.2687	24.2832	23.5265	Q9CWS0	DDAH1_MOUSE	Ddah1	N(G),N(G)-dimethylarginine dimethylaminohydrolase 1
Q9CYN9	RENR_MOUSE	Atp6ap2	Renin receptor		0.214238	0.622041	sp|Q9CYN9|RENR_MOUSE	3	3	3	15.7	15.7	15.7	39.091	0.0019011	10.633	56625000	29	23.2595	24.2145	20.035	19.6666	22.6502	23.0017	23.2826	19.5542	20.4801	20.3969	Q9CYN9	RENR_MOUSE	Atp6ap2	Renin receptor
Q9CZ30	OLA1_MOUSE	Ola1	Obg-like ATPase 1		0.123479	0.374794	sp|Q9CZ30|OLA1_MOUSE;tr|B1AYJ9|B1AYJ9_MOUSE	6	6	6	24	24	24	44.729	0	44.435	77394000	37	23.7528	23.2035	23.7132	18.7239	23.6675	23.4639	20.8813	20.6615	23.0997	23.0806	Q9CZ30	OLA1_MOUSE	Ola1	Obg-like ATPase 1
Q9CZ44	NSF1C_MOUSE	Nsfl1c	NSFL1 cofactor p47		0.443491	-0.229309	sp|Q9CZ44|NSF1C_MOUSE;tr|A2AT02|A2AT02_MOUSE	6	6	6	20	20	20	40.709	0	24.598	51036000	41	21.0115	20.1308	21.104	21.0318	20.3865	21.1669	20.4893	21.2083	20.9358	21.0107	Q9CZ44	NSF1C_MOUSE	Nsfl1c	NSFL1 cofactor p47
Q9CZD3	GARS_MOUSE	Gars1	Glycine--tRNA ligase		0.466886	-0.583445	sp|Q9CZD3|GARS_MOUSE	7	7	7	12.6	12.6	12.6	81.877	0	48.619	73701000	38	21.2398	20.7455	18.776	20.3785	21.7191	21.2613	21.0437	20.1583	21.8516	21.4611	Q9CZD3	GARS_MOUSE	Gars1	Glycine--tRNA ligase
Q9CZU6	CISY_MOUSE	Cs	Citrate synthase, mitochondrial		0.865515	-0.544553	sp|Q9CZU6|CISY_MOUSE	11	11	11	22.6	22.6	22.6	51.736	0	37.295	365360000	111	24.2252	23.1221	22.6065	22.7687	22.6534	23.5335	24.0247	23.3137	23.8146	23.4122	Q9CZU6	CISY_MOUSE	Cs	Citrate synthase, mitochondrial
Q9D0F9	PGM1_MOUSE	Pgm1	Phosphoglucomutase-1		0.735713	-0.7282	sp|Q9D0F9|PGM1_MOUSE;tr|A2CEK3|A2CEK3_MOUSE	11	11	11	25.3	25.3	25.3	61.417	0	69.099	61036000	39	20.7668	18.6087	20.6535	20.5315	20.7276	21.2572	21.0767	20.0043	21.7091	20.8817	Q9D0F9	PGM1_MOUSE	Pgm1	Phosphoglucomutase-1
Q9D0I9	SYRC_MOUSE	Rars1	Arginine--tRNA ligase, cytoplasmic		0.406728	-0.885086	sp|Q9D0I9|SYRC_MOUSE	12	12	12	21.7	21.7	21.7	75.673	0	137.31	155670000	103	23.5416	21.9143	22.4031	18.6101	23.5908	23.0013	21.9612	22.36	24.0595	23.1034	Q9D0I9	SYRC_MOUSE	Rars1	Arginine--tRNA ligase, cytoplasmic
Q3UJQ9	Q3UJQ9_MOUSE	Oxct1	Succinyl-CoA:3-ketoacid-coenzyme A transferase		0.513926	-0.856368	tr|Q3UJQ9|Q3UJQ9_MOUSE;sp|Q9D0K2|SCOT1_MOUSE	9	9	9	29.4	29.4	29.4	52.278	0	323.31	176800000	75	23.3809	21.736	22.2427	19.2265	22.323	22.6897	22.4211	21.8703	24.0023	22.2073	Q3UJQ9	Q3UJQ9_MOUSE	Oxct1	Succinyl-CoA:3-ketoacid-coenzyme A transferase
Q9D1A2	CNDP2_MOUSE	Cndp2	Cytosolic non-specific dipeptidase		0.000480107	0.000751495	sp|Q9D1A2|CNDP2_MOUSE	14	14	14	42.3	42.3	42.3	52.767	0	323.31	417890000	133	23.3935	22.4828	22.5104	22.8028	23.2974	23.202	23.2045	20.9755	23.7287	23.3724	Q9D1A2	CNDP2_MOUSE	Cndp2	Cytosolic non-specific dipeptidase
Q9D2M8	UB2V2_MOUSE	Ube2v2	Ubiquitin-conjugating enzyme E2 variant 2		0.0284336	-0.0627644	sp|Q9D2M8|UB2V2_MOUSE;tr|A6X925|A6X925_MOUSE;sp|Q9CZY3|UB2V1_MOUSE;tr|B7ZBY7|B7ZBY7_MOUSE;tr|E9PY39|E9PY39_MOUSE;tr|B7ZBY6|B7ZBY6_MOUSE	5	5	5	29	29	29	16.367	0	27.908	72659000	32	22.3741	21.836	22.0175	19.2967	22.6618	22.3319	20.5473	20.5586	22.6681	22.394	Q9D2M8	UB2V2_MOUSE	Ube2v2	Ubiquitin-conjugating enzyme E2 variant 2
Q9D2R0	AACS_MOUSE	Aacs	Acetoacetyl-CoA synthetase		0.0755837	-0.232064	sp|Q9D2R0|AACS_MOUSE	7	7	7	17.9	17.9	17.9	75.199	0	82.132	77661000	28	23.3069	19.8735	22.3313	19.1919	23.1844	22.3339	22.0248	19.1226	23.3624	22.2045	Q9D2R0	AACS_MOUSE	Aacs	Acetoacetyl-CoA synthetase
Q9D358	PPAC_MOUSE	Acp1	Low molecular weight phosphotyrosine protein phosphatase		1.96277	-2.11094	sp|Q9D358|PPAC_MOUSE;tr|A0A1W2P7X3|A0A1W2P7X3_MOUSE;tr|Q561M1|Q561M1_MOUSE	4	4	4	24.7	24.7	24.7	18.192	0.0017637	8.5594	54044000	20	21.0208	18.3543	19.9131	20.5543	20.2925	22.5077	20.3745	22.2881	22.7047	22.8146	Q9D358	PPAC_MOUSE	Acp1	Low molecular weight phosphotyrosine protein phosphatase
Q9D819	IPYR_MOUSE	Ppa1	Inorganic pyrophosphatase		0.391055	-0.215612	sp|Q9D819|IPYR_MOUSE	13	13	13	61.2	61.2	61.2	32.667	0	149.76	531600000	149	23.7654	23.4603	23.2771	23.1538	24.2083	23.8705	23.3915	23.5093	24.2795	23.892	Q9D819	IPYR_MOUSE	Ppa1	Inorganic pyrophosphatase
Q9D8N0	EF1G_MOUSE	Eef1g	Elongation factor 1-gamma		0.0147908	-0.00895195	sp|Q9D8N0|EF1G_MOUSE	14	14	14	35.9	35.9	35.9	50.06	0	323.31	828890000	264	24.7412	24.5431	24.426	24.4859	25.2374	24.8023	24.3314	24.425	25.1366	24.783	Q9D8N0	EF1G_MOUSE	Eef1g	Elongation factor 1-gamma
Q9D9V3	ECHD1_MOUSE	Echdc1	Ethylmalonyl-CoA decarboxylase		0.233002	0.741226	sp|Q9D9V3|ECHD1_MOUSE;tr|E0CXS3|E0CXS3_MOUSE	14	14	14	50.3	50.3	50.3	35.467	0	323.31	401890000	137	25.2057	23.6359	23.3106	23.3049	25.4898	24.5042	24.1475	18.6744	25.3887	24.5261	Q9D9V3	ECHD1_MOUSE	Echdc1	Ethylmalonyl-CoA decarboxylase
Q9DBB9	CPN2_MOUSE	Cpn2	Carboxypeptidase N subunit 2		0.204369	-0.200347	sp|Q9DBB9|CPN2_MOUSE	10	10	10	25.6	25.6	25.6	60.478	0	180.52	287700000	117	22.9708	24.0017	23.6169	24.1726	23.2836	23.8537	24.1406	24.6829	22.7044	23.6658	Q9DBB9	CPN2_MOUSE	Cpn2	Carboxypeptidase N subunit 2
Q9DBD0	ICA_MOUSE	Ica	Inhibitor of carbonic anhydrase		0.101251	0.0648369	sp|Q9DBD0|ICA_MOUSE;tr|D3YY36|D3YY36_MOUSE	20	19	19	42.7	41.6	41.6	76.765	0	323.31	1089900000	359	24.322	24.9171	24.8699	24.9406	24.1677	24.3909	24.7752	25.0379	24.0342	24.6549	Q9DBD0	ICA_MOUSE	Ica	Inhibitor of carbonic anhydrase
Q9DBF1	AL7A1_MOUSE	Aldh7a1	Alpha-aminoadipic semialdehyde dehydrogenase		0.0495218	-0.0758675	sp|Q9DBF1|AL7A1_MOUSE;tr|G3UYR8|G3UYR8_MOUSE;tr|G3UY72|G3UY72_MOUSE	8	8	8	21.5	21.5	21.5	58.861	0	72.132	102910000	53	23.0069	22.0277	21.5447	21.8946	22.8385	22.8812	22.3842	20.5996	23.3087	22.518	Q9DBF1	AL7A1_MOUSE	Aldh7a1	Alpha-aminoadipic semialdehyde dehydrogenase
Q9DBJ1	PGAM1_MOUSE	Pgam1	Phosphoglycerate mutase 1		0.0498347	-0.048402	sp|Q9DBJ1|PGAM1_MOUSE	8	8	8	38.6	38.6	38.6	28.832	0	323.31	2423600000	326	26.9931	26.3667	26.0875	25.5966	27.0641	26.5819	26.1519	25.9861	27.166	26.4641	Q9DBJ1	PGAM1_MOUSE	Pgam1	Phosphoglycerate mutase 1
Q9DBP0	NPT2B_MOUSE	Slc34a2	Sodium-dependent phosphate transport protein 2B		0.268261	0.59115	sp|Q9DBP0|NPT2B_MOUSE;tr|E9QAX5|E9QAX5_MOUSE	3	3	3	3.4	3.4	3.4	76.244	0	48.045	246680000	72	19.864	22.5819	22.9721	23.1261	22.6499	19.804	21.6427	23.4531	22.9096	20.4289	Q9DBP0	NPT2B_MOUSE	Slc34a2	Sodium-dependent phosphate transport protein 2B
Q9DBP5	KCY_MOUSE	Cmpk1	UMP-CMP kinase		1.3506	-0.620967	sp|Q9DBP5|KCY_MOUSE;tr|A0A0R4J093|A0A0R4J093_MOUSE	6	6	6	37.2	37.2	37.2	22.165	0	112.5	641040000	129	23.9505	23.4646	23.6428	23.3736	24.3516	24.4096	24.1434	23.845	24.9862	24.5038	Q9DBP5	KCY_MOUSE	Cmpk1	UMP-CMP kinase
Q9DCD0	6PGD_MOUSE	Pgd	6-phosphogluconate dehydrogenase, decarboxylating		0.0528328	0.0386353	sp|Q9DCD0|6PGD_MOUSE	24	24	24	56.9	56.9	56.9	53.247	0	323.31	5179000000	1013	26.6363	25.7993	26.2175	25.7902	26.6663	26.2387	26.0266	25.679	26.7603	26.2118	Q9DCD0	6PGD_MOUSE	Pgd	6-phosphogluconate dehydrogenase, decarboxylating
Q9DCW4	ETFB_MOUSE	Etfb	Electron transfer flavoprotein subunit beta		0.00610007	-0.0232647	sp|Q9DCW4|ETFB_MOUSE;tr|A0A0U1RNP5|A0A0U1RNP5_MOUSE;tr|A0A0N4SVE0|A0A0N4SVE0_MOUSE;tr|A0A0U1RNR3|A0A0U1RNR3_MOUSE;tr|A0A0U1RNK9|A0A0U1RNK9_MOUSE	6	6	6	31.8	31.8	31.8	27.623	0	90.56	92871000	45	23.5446	19.9423	20.2841	20.8423	22.6491	22.8844	21.7724	17.2623	23.2204	22.2393	Q9DCW4	ETFB_MOUSE	Etfb	Electron transfer flavoprotein subunit beta
Q9EPB4	ASC_MOUSE	Pycard	Apoptosis-associated speck-like protein containing a CARD		0.0580926	-0.159362	sp|Q9EPB4|ASC_MOUSE;tr|A0A0U1RQ20|A0A0U1RQ20_MOUSE	6	6	6	39.4	39.4	39.4	21.458	0	44.517	80907000	41	23.1039	22.96	20.1936	22.5373	22.9226	23.2116	19.3183	23.0463	23.9336	23.0043	Q9EPB4	ASC_MOUSE	Pycard	Apoptosis-associated speck-like protein containing a CARD
A0A494B9H1	A0A494B9H1_MOUSE	Sil1	Nucleotide exchange factor SIL1		0.323822	-0.153905	tr|A0A494B9H1|A0A494B9H1_MOUSE;sp|Q9EPK6|SIL1_MOUSE;tr|A0A494B9B2|A0A494B9B2_MOUSE	4	4	4	11.5	11.5	11.5	46.779	0.0020325	13.166	88464000	39	23.1821	22.8843	23.3076	22.8441	22.9834	23.1174	23.6077	23.5925	22.6295	23.024	A0A494B9H1	A0A494B9H1_MOUSE	Sil1	Nucleotide exchange factor SIL1
Q9ER72	SYCC_MOUSE	Cars1	Cysteine--tRNA ligase, cytoplasmic		0.116952	0.137765	sp|Q9ER72|SYCC_MOUSE	5	5	5	7.8	7.8	7.8	94.859	0	47.26	57505000	24	21.0832	20.6661	19.727	21.6088	21.2505	20.9939	20.3304	19.7382	21.3181	21.2661	Q9ER72	SYCC_MOUSE	Cars1	Cysteine--tRNA ligase, cytoplasmic
Q9ERH8	S28A3_MOUSE	Slc28a3	Solute carrier family 28 member 3		0.116475	-0.360948	sp|Q9ERH8|S28A3_MOUSE	3	3	3	5.3	5.3	5.3	78.309	0	43.756	115700000	49	19.0217	23.0584	23.6891	22.5079	21.3835	23.108	23.2146	23.6547	22.4107	19.0774	Q9ERH8	S28A3_MOUSE	Slc28a3	Solute carrier family 28 member 3
Q9ESY9	GILT_MOUSE	Ifi30	Gamma-interferon-inducible lysosomal thiol reductase		1.79941	0.831738	sp|Q9ESY9|GILT_MOUSE	2	2	2	12.9	12.9	12.9	27.784	0	48.496	177430000	124	24.2053	24.4283	24.0659	24.8214	23.6555	23.2876	23.9778	23.574	23.383	22.7952	Q9ESY9	GILT_MOUSE	Ifi30	Gamma-interferon-inducible lysosomal thiol reductase
Q9JHH6	CBPB2_MOUSE	Cpb2	Carboxypeptidase B2		0.627037	1.18504	sp|Q9JHH6|CBPB2_MOUSE	4	4	3	10.9	10.9	9	48.87	0.001992	12.063	66726000	31	19.6906	22.5681	22.1435	19.2659	21.7925	22.2749	19.5438	18.9495	18.7377	20.0294	Q9JHH6	CBPB2_MOUSE	Cpb2	Carboxypeptidase B2
Q9JII6	AK1A1_MOUSE	Akr1a1	Aldo-keto reductase family 1 member A1		0.976939	-0.339437	sp|Q9JII6|AK1A1_MOUSE;tr|B1AXW3|B1AXW3_MOUSE	8	8	8	30.2	30.2	30.2	36.586	0	323.31	429010000	101	24.1746	23.7782	23.7396	23.7699	24.5694	24.5216	24.4483	24.0603	24.4986	24.2001	Q9JII6	AK1A1_MOUSE	Akr1a1	Aldo-keto reductase family 1 member A1
Q9JJN5	CBPN_MOUSE	Cpn1	Carboxypeptidase N catalytic chain		0.177108	-0.448775	sp|Q9JJN5|CBPN_MOUSE	4	4	4	11.2	11.2	11.2	51.845	0	22.045	51673000	29	19.8683	23.1833	20.4432	23.1021	22.5716	22.9046	23.1515	23.1089	19.4403	22.8071	Q9JJN5	CBPN_MOUSE	Cpn1	Carboxypeptidase N catalytic chain
Q9JKB1	UCHL3_MOUSE	Uchl3	Ubiquitin carboxyl-terminal hydrolase isozyme L3		0.17139	-0.275473	sp|Q9JKB1|UCHL3_MOUSE;tr|A0A2I3BQ39|A0A2I3BQ39_MOUSE	5	5	5	29.1	29.1	29.1	26.151	0.0019685	11.839	36295000	23	21.5581	18.6183	20.9101	19.8139	21.3651	21.4013	19.8088	20.273	21.3724	20.7874	Q9JKB1	UCHL3_MOUSE	Uchl3	Ubiquitin carboxyl-terminal hydrolase isozyme L3
Q9JKR6	HYOU1_MOUSE	Hyou1	Hypoxia up-regulated protein 1		0.126544	0.196599	sp|Q9JKR6|HYOU1_MOUSE	7	7	7	10.2	10.2	10.2	111.18	0.0021053	15.093	28339000	19	21.525	21.1983	19.4092	19.5772	21.9633	19.9816	21.016	19.769	20.8901	21.0333	Q9JKR6	HYOU1_MOUSE	Hyou1	Hypoxia up-regulated protein 1
Q9JLJ2	AL9A1_MOUSE	Aldh9a1	4-trimethylaminobutyraldehyde dehydrogenase		0.293025	-0.230799	sp|Q9JLJ2|AL9A1_MOUSE;tr|Q3U367|Q3U367_MOUSE	12	12	12	32.4	32.4	32.4	53.514	0	275.73	436550000	122	24.8191	23.9758	24.2271	23.991	24.6559	24.7988	24.4004	23.5609	25.2679	24.7949	Q9JLJ2	AL9A1_MOUSE	Aldh9a1	4-trimethylaminobutyraldehyde dehydrogenase
E9PYI8	E9PYI8_MOUSE	Usp14	Ubiquitin carboxyl-terminal hydrolase		0.323682	-0.603293	tr|E9PYI8|E9PYI8_MOUSE;sp|Q9JMA1|UBP14_MOUSE	5	5	5	13.1	13.1	13.1	52.318	0.0021413	16.183	36379000	22	21.1752	18.502	20.0816	20.0513	21.8488	21.6241	21.0228	18.7415	21.9006	21.3863	E9PYI8	E9PYI8_MOUSE	Usp14	Ubiquitin carboxyl-terminal hydrolase
Q9JMH6	TRXR1_MOUSE	Txnrd1	Thioredoxin reductase 1, cytoplasmic		0.0406616	0.0372364	sp|Q9JMH6|TRXR1_MOUSE	9	9	9	21	21	21	67.083	0	46.652	184440000	84	24.6085	24.175	23.8074	23.2487	24.3126	24.2343	23.3543	23.7139	24.6455	24.018	Q9JMH6	TRXR1_MOUSE	Txnrd1	Thioredoxin reductase 1, cytoplasmic
Q9QUH0	GLRX1_MOUSE	Glrx	Glutaredoxin-1		0.875903	-1.51133	sp|Q9QUH0|GLRX1_MOUSE;tr|A0A1Y7VM65|A0A1Y7VM65_MOUSE	4	4	4	49.5	49.5	49.5	11.871	0	323.31	246390000	105	24.2954	23.5821	19.2727	23.6847	23.2187	24.1822	24.5015	24.2782	24.4666	24.1818	Q9QUH0	GLRX1_MOUSE	Glrx	Glutaredoxin-1
Q9QUR8	SEM7A_MOUSE	Sema7a	Semaphorin-7A		0.1326	0.0788128	sp|Q9QUR8|SEM7A_MOUSE	11	11	11	28.5	28.5	28.5	74.993	0	100.13	649610000	129	24.436	24.9809	24.782	24.3335	24.5122	24.5228	24.8449	24.9742	23.8679	24.4408	Q9QUR8	SEM7A_MOUSE	Sema7a	Semaphorin-7A
Q9QXC1	FETUB_MOUSE	Fetub	Fetuin-B		0.267541	-0.195075	sp|Q9QXC1|FETUB_MOUSE;tr|Q6YJU1|Q6YJU1_MOUSE;tr|A0A338P7B8|A0A338P7B8_MOUSE	10	10	10	36.1	36.1	36.1	42.712	0	323.31	1192800000	213	24.4463	25.1366	24.7569	24.5979	23.6489	24.5206	24.9372	25.029	24.0888	24.9865	Q9QXC1	FETUB_MOUSE	Fetub	Fetuin-B
Q9R0E1	PLOD3_MOUSE	Plod3	Multifunctional procollagen lysine hydroxylase and glycosyltransferase LH3		0.212767	-0.26013	sp|Q9R0E1|PLOD3_MOUSE	4	4	4	5.5	5.5	5.5	84.921	0.0020161	12.588	38987000	26	20.4743	20.6579	20.9628	21.16	18.5951	20.7458	20.9641	20.1779	20.2258	21.0372	Q9R0E1	PLOD3_MOUSE	Plod3	Multifunctional procollagen lysine hydroxylase and glycosyltransferase LH3
Q9R0P3	ESTD_MOUSE	Esd	S-formylglutathione hydrolase		0.380199	-0.214862	sp|Q9R0P3|ESTD_MOUSE;tr|H3BKH6|H3BKH6_MOUSE;tr|H3BJP2|H3BJP2_MOUSE;tr|H3BLJ9|H3BLJ9_MOUSE;tr|H3BJL6|H3BJL6_MOUSE;tr|H3BK43|H3BK43_MOUSE	6	6	6	35.8	35.8	35.8	31.319	0	110.42	166150000	62	22.8285	21.9817	22.3761	21.8525	22.5985	22.7081	22.1437	22.1348	22.9836	22.7414	Q9R0P3	ESTD_MOUSE	Esd	S-formylglutathione hydrolase
Q9R0P5	DEST_MOUSE	Dstn	Destrin		0.138409	-0.0971226	sp|Q9R0P5|DEST_MOUSE	4	4	4	29.7	29.7	29.7	18.521	0	323.31	136310000	62	21.8297	21.5612	21.7177	20.9657	22.1153	21.7126	21.4069	21.2549	22.2751	22.0258	Q9R0P5	DEST_MOUSE	Dstn	Destrin
Q3TKX1	Q3TKX1_MOUSE	Atp6ap1	ATPase, H+ transporting, lysosomal accessory protein		0.112291	0.0686604	tr|Q3TKX1|Q3TKX1_MOUSE;sp|Q9R1Q9|VAS1_MOUSE;tr|B7FAU3|B7FAU3_MOUSE	5	5	5	18.8	18.8	18.8	45.534	0	119.96	231150000	86	23.9853	24.2016	24.0263	24.1773	23.2657	23.8537	24.4103	23.8908	23.5602	23.598	Q3TKX1	Q3TKX1_MOUSE	Atp6ap1	ATPase, H+ transporting, lysosomal accessory protein
Q9WTP6	KAD2_MOUSE	Ak2	Adenylate kinase 2, mitochondrial		0.128894	-0.184208	sp|Q9WTP6|KAD2_MOUSE	9	9	9	43.9	43.9	43.9	26.468	0	55.607	217800000	87	22.8341	21.4211	21.3996	21.1875	22.5471	23.0794	21.7478	20.5942	22.5888	22.3002	Q9WTP6	KAD2_MOUSE	Ak2	Adenylate kinase 2, mitochondrial
Q9WU78	PDC6I_MOUSE	Pdcd6ip	Programmed cell death 6-interacting protein		0.464526	-0.587674	sp|Q9WU78|PDC6I_MOUSE	10	10	10	15.8	15.8	15.8	96.023	0	45.17	84105000	40	21.4113	19.529	19.4464	20.5285	21.3842	20.3674	20.3736	20.869	22.5289	21.0989	Q9WU78	PDC6I_MOUSE	Pdcd6ip	Programmed cell death 6-interacting protein
Q9WUK2	IF4H_MOUSE	Eif4h	Eukaryotic translation initiation factor 4H		0.838123	-1.00403	sp|Q9WUK2|IF4H_MOUSE	4	4	4	24.2	24.2	24.2	27.341	0	23.647	60008000	41	21.8558	21.7153	19.1942	22.0957	22.6036	22.5876	22.0357	22.0983	22.8944	22.8688	Q9WUK2	IF4H_MOUSE	Eif4h	Eukaryotic translation initiation factor 4H
Q9WUU7	CATZ_MOUSE	Ctsz	Cathepsin Z		1.04129	0.830793	sp|Q9WUU7|CATZ_MOUSE	8	8	8	28.1	28.1	28.1	33.996	0	66.744	397510000	111	21.5818	23.3339	23.5088	23.5262	23.488	21.8337	22.4382	22.9923	21.9523	22.0683	Q9WUU7	CATZ_MOUSE	Ctsz	Cathepsin Z
Q9Z0S1	BPNT1_MOUSE	Bpnt1	3(2),5-bisphosphate nucleotidase 1		1.06827	-0.48733	sp|Q9Z0S1|BPNT1_MOUSE;tr|A0A1B0GRV0|A0A1B0GRV0_MOUSE;tr|D3Z0E6|D3Z0E6_MOUSE	13	13	13	55.5	55.5	55.5	33.196	0	62.139	226370000	103	21.9652	21.6944	21.7472	21.4667	22.5474	22.5017	21.924	22.0399	22.799	22.593	Q9Z0S1	BPNT1_MOUSE	Bpnt1	3(2),5-bisphosphate nucleotidase 1
Q9Z1Q5	CLIC1_MOUSE	Clic1	Chloride intracellular channel protein 1		0.720494	-1.07627	sp|Q9Z1Q5|CLIC1_MOUSE	6	6	6	34	34	34	27.013	0	190.65	234400000	105	23.9278	19.8991	23.2032	22.6075	23.7551	24.124	23.6907	23.2078	24.121	23.6306	Q9Z1Q5	CLIC1_MOUSE	Clic1	Chloride intracellular channel protein 1
Q9Z1Q9	SYVC_MOUSE	Vars1	Valine--tRNA ligase		0.419882	0.492052	sp|Q9Z1Q9|SYVC_MOUSE;tr|G3UY93|G3UY93_MOUSE	12	12	12	13.6	13.6	13.6	140.21	0	75.616	54797000	39	21.8729	21.4427	21.3611	20.2259	21.9796	21.6252	20.7249	19.2984	21.5908	21.1827	Q9Z1Q9	SYVC_MOUSE	Vars1	Valine--tRNA ligase
Q9Z1Z0	USO1_MOUSE	Uso1	General vesicular transport factor p115		0.702101	-1.16434	sp|Q9Z1Z0|USO1_MOUSE	10	10	10	16.1	16.1	16.1	106.98	0	86.966	67320000	30	21.6433	19.3279	20.7776	17.8802	21.7171	21.8985	21.9323	19.9292	21.9131	21.4948	Q9Z1Z0	USO1_MOUSE	Uso1	General vesicular transport factor p115
Q9Z2I8	SUCB2_MOUSE	Suclg2	Succinate--CoA ligase [GDP-forming] subunit beta, mitochondrial		0.350441	-0.46981	sp|Q9Z2I8|SUCB2_MOUSE	6	6	6	16.9	16.9	16.9	46.839	0	127.57	81478000	40	21.5798	19.6908	19.6566	19.1839	21.2568	20.9411	21.2395	19.401	21.0469	21.0885	Q9Z2I8	SUCB2_MOUSE	Suclg2	Succinate--CoA ligase [GDP-forming] subunit beta, mitochondrial
Q9Z2Y8	PLPHP_MOUSE	Plpbp	Pyridoxal phosphate homeostasis protein		0.000205715	-0.000436783	sp|Q9Z2Y8|PLPHP_MOUSE;tr|A0A1B0GRP7|A0A1B0GRP7_MOUSE;tr|Q6P8V7|Q6P8V7_MOUSE;tr|A0A1B0GRR5|A0A1B0GRR5_MOUSE;tr|Q80ZV3|Q80ZV3_MOUSE;tr|A0A1B0GSP5|A0A1B0GSP5_MOUSE;tr|A0A1B0GQY5|A0A1B0GQY5_MOUSE	8	8	8	36.9	36.9	36.9	30.048	0	53.753	127330000	56	22.5137	21.9956	19.8277	22.4389	23.442	22.6645	20.6047	21.9786	22.6856	22.2867	Q9Z2Y8	PLPHP_MOUSE	Plpbp	Pyridoxal phosphate homeostasis protein
A0A075B5N4	A0A075B5N4_MOUSE	Igkv8-27	Immunoglobulin kappa chain variable 8-27		1.15933	-2.32517	tr|A0A075B5N4|A0A075B5N4_MOUSE;tr|A0A140T8P7|A0A140T8P7_MOUSE;tr|A0A0G2JF28|A0A0G2JF28_MOUSE;tr|A0A140T8M3|A0A140T8M3_MOUSE	3	3	2	42	42	33	10.976	0.0021097	15.194	70970000	38	19.8124	19.5539	18.9165	20.7292	20.3212	18.7609	20.9545	23.8746	22.6719	24.6973	A0A075B5N4	A0A075B5N4_MOUSE	Igkv8-27	Immunoglobulin kappa chain variable 8-27
A0A075B5P3	A0A075B5P3_MOUSE	Ighg2b	Immunoglobulin heavy constant gamma 2B (Fragment)		0.958101	0.659055	tr|A0A075B5P3|A0A075B5P3_MOUSE;tr|A0A0A6YVP0|A0A0A6YVP0_MOUSE;sp|P01867|IGG2B_MOUSE	16	16	14	54.8	54.8	49.1	36.568	0	323.31	2017000000	456	26.145	26.649	27.1141	27.5611	26.375	25.9353	26.8716	26.3515	25.2635	26.127	A0A075B5P3	A0A075B5P3_MOUSE	Ighg2b	Immunoglobulin heavy constant gamma 2B (Fragment)
A0A075B5P4	A0A075B5P4_MOUSE	Ighg1	Ig gamma-1 chain C region secreted form (Fragment)		1.61428	-1.16101	tr|A0A075B5P4|A0A075B5P4_MOUSE;tr|A0A0A6YWR2|A0A0A6YWR2_MOUSE;sp|P01868|IGHG1_MOUSE;sp|P01869|IGH1M_MOUSE	10	10	10	54.9	54.9	54.9	35.633	0	323.31	1593300000	319	24.5285	23.3309	24.0208	24.9445	24.1913	25.1432	25.1419	25.9437	24.3958	26.1964	A0A075B5P4	A0A075B5P4_MOUSE	Ighg1	Ig gamma-1 chain C region secreted form (Fragment)
F6TQW2	F6TQW2_MOUSE	Ighg2c	Immunoglobulin heavy constant gamma 2C (Fragment)		1.10992	1.06906	tr|F6TQW2|F6TQW2_MOUSE;tr|A0A0A6YY53|A0A0A6YY53_MOUSE;sp|P01864|GCAB_MOUSE	8	6	6	22	17.3	17.3	44.095	0	100.62	109510000	48	22.4199	22.0457	22.6087	22.7532	21.7702	22.443	21.9608	19.8108	21.6582	20.3796	F6TQW2	F6TQW2_MOUSE	Ighg2c	Immunoglobulin heavy constant gamma 2C (Fragment)
A0A0B4J1E8	A0A0B4J1E8_MOUSE	Chrdl2	Chordin-like protein 2		0.085969	0.185349	tr|A0A0B4J1E8|A0A0B4J1E8_MOUSE;tr|D3YV59|D3YV59_MOUSE;sp|Q8VEA6|CRDL2_MOUSE	3	3	3	14.1	14.1	14.1	47.712	0.0018904	10.543	43683000	26	19.4083	19.8423	22.4981	22.7437	21.3725	21.7706	19.5868	20.5554	21.4062	21.6191	A0A0B4J1E8	A0A0B4J1E8_MOUSE	Chrdl2	Chordin-like protein 2
A0A0R4J0I1	A0A0R4J0I1_MOUSE	Serpina3k	Serine protease inhibitor A3K		0.515755	-0.336464	tr|A0A0R4J0I1|A0A0R4J0I1_MOUSE;sp|P07759|SPA3K_MOUSE	23	23	15	53.1	53.1	33.7	46.672	0	323.31	48383000000	5716	28.2169	28.7813	28.5358	29.3744	27.9546	28.8266	28.989	29.4148	28.2747	29.0401	A0A0R4J0I1	A0A0R4J0I1_MOUSE	Serpina3k	Serine protease inhibitor A3K
A0A0R4J0X5	A0A0R4J0X5_MOUSE	Serpina1c	Alpha-1-antitrypsin 1-3		0.00909887	-0.00579109	tr|A0A0R4J0X5|A0A0R4J0X5_MOUSE;sp|Q00896|A1AT3_MOUSE	21	10	3	58.8	36.3	14.3	45.854	0	323.31	22099000000	1753	29.6441	29.9238	29.3293	29.3885	29.18	29.2934	29.0692	30.02	29.3511	29.7611	A0A0R4J0X5	A0A0R4J0X5_MOUSE	Serpina1c	Alpha-1-antitrypsin 1-3
A0A1B0GS57	A0A1B0GS57_MOUSE	Hpx	Hemopexin (Fragment)		0.956707	1.37548	tr|A0A1B0GS57|A0A1B0GS57_MOUSE	9	3	3	35.8	17.9	17.9	21.329	0	188.07	587950000	150	22.9236	24.5215	24.4807	24.2004	23.372	23.3265	22.944	23.4702	19.7609	23.1193	A0A1B0GS57	A0A1B0GS57_MOUSE	Hpx	Hemopexin (Fragment)
A0A2I3BPT0	A0A2I3BPT0_MOUSE	Glycam1	Glycosylation-dependent cell adhesion molecule 1		0.64644	0.745575	tr|A0A2I3BPT0|A0A2I3BPT0_MOUSE	9	2	2	57	8.6	8.6	14.081	0	323.31	1049700000	346	24.1006	25.0414	26.0807	26.8338	25.5581	24.9473	25.7467	24.8907	23.7031	24.5989	A0A2I3BPT0	A0A2I3BPT0_MOUSE	Glycam1	Glycosylation-dependent cell adhesion molecule 1
A0A2I3BQE1	A0A2I3BQE1_MOUSE	AI182371	Expressed sequence AI182371		0.123202	0.106094	tr|A0A2I3BQE1|A0A2I3BQE1_MOUSE;tr|A0A2I3BRQ1|A0A2I3BRQ1_MOUSE;tr|A2AS37|A2AS37_MOUSE	5	5	5	19.7	19.7	19.7	39.898	0	27.806	50314000	35	20.3971	20.7539	21.202	21.2299	20.295	20.5675	19.9068	21.5242	20.5394	20.8095	A0A2I3BQE1	A0A2I3BQE1_MOUSE	AI182371	Expressed sequence AI182371
Q3UTR7	Q3UTR7_MOUSE	Agt	Angiotensin 1-10		0.0119418	0.00682068	tr|Q3UTR7|Q3UTR7_MOUSE;tr|A0A5F8MPW1|A0A5F8MPW1_MOUSE;sp|P11859|ANGT_MOUSE	15	15	15	42.5	42.5	42.5	52.67	0	323.31	3226900000	701	27.0523	27.0921	27.0075	26.7903	26.2786	26.5866	26.965	27.0895	26.4981	27.0475	Q3UTR7	Q3UTR7_MOUSE	Agt	Angiotensin 1-10
A8DUK4	A8DUK4_MOUSE	Hbb-bs	Beta-globin		0.78384	-1.76043	tr|A8DUK4|A8DUK4_MOUSE;sp|P02088|HBB1_MOUSE;tr|E9Q223|E9Q223_MOUSE	12	12	10	89.8	89.8	76.9	15.748	0	323.31	821290000	222	24.057	19.4416	23.9097	21.2786	24.8573	25.4827	25.3044	22.8142	25.2069	23.538	A8DUK4	A8DUK4_MOUSE	Hbb-bs	Beta-globin
B1ARV3	B1ARV3_MOUSE	Lao1	Amine oxidase		0.391922	0.379595	tr|B1ARV3|B1ARV3_MOUSE	14	14	14	36.9	36.9	36.9	58.051	0	323.31	1009600000	301	23.9721	24.6016	25.2939	26.3086	24.2724	24.4376	24.7059	24.2901	24.276	24.8411	B1ARV3	B1ARV3_MOUSE	Lao1	Amine oxidase
B8JJN0	B8JJN0_MOUSE	Gm20547	C3/C5 convertase		0.535878	-0.362497	tr|B8JJN0|B8JJN0_MOUSE;tr|F6XQ00|F6XQ00_MOUSE;tr|B8JJM6|B8JJM6_MOUSE;sp|P04186|CFAB_MOUSE;tr|B8JJM5|B8JJM5_MOUSE;tr|F6VQX8|F6VQX8_MOUSE;tr|F6W2T4|F6W2T4_MOUSE	15	15	15	14	14	14	142.32	0	50.296	585860000	172	22.3538	23.0075	23.2055	23.5465	22.547	23.1178	23.8156	23.858	22.635	23.0463	B8JJN0	B8JJN0_MOUSE	Gm20547	C3/C5 convertase
D3Z5G7	D3Z5G7_MOUSE	Ces1b	Carboxylic ester hydrolase		0.454631	-0.191422	tr|D3Z5G7|D3Z5G7_MOUSE	15	6	6	28.2	16.4	16.4	62.196	0	115.44	106260000	37	22.9096	23.4777	23.1099	23.6694	23.0957	23.4481	23.68	23.6894	22.9497	23.4521	D3Z5G7	D3Z5G7_MOUSE	Ces1b	Carboxylic ester hydrolase
D3Z6I8	D3Z6I8_MOUSE	Tpm3	Tropomyosin alpha-3 chain		0.74718	0.626083	tr|D3Z6I8|D3Z6I8_MOUSE;tr|E9Q7Q3|E9Q7Q3_MOUSE;tr|D3Z2H9|D3Z2H9_MOUSE	7	7	7	27.1	27.1	27.1	28.723	0	51.727	113360000	44	21.5306	21.5331	21.7299	21.6547	21.5638	22.0427	19.9915	20.0021	21.6761	21.1693	D3Z6I8	D3Z6I8_MOUSE	Tpm3	Tropomyosin alpha-3 chain
E9PZF0	E9PZF0_MOUSE	Gm20390	Nucleoside diphosphate kinase		0.224735	-0.150241	tr|E9PZF0|E9PZF0_MOUSE;tr|Q5NC80|Q5NC80_MOUSE;sp|Q01768|NDKB_MOUSE	14	14	5	76.8	76.8	25.1	30.2	0	323.31	6304100000	789	27.1285	26.4302	26.4256	26.24	27.1878	26.6462	26.672	26.3505	27.4274	27.0672	E9PZF0	E9PZF0_MOUSE	Gm20390	Nucleoside diphosphate kinase
E9QN99	E9QN99_MOUSE	Abhd14b	Protein ABHD14B		1.12894	-0.472096	tr|E9QN99|E9QN99_MOUSE;tr|A0A087WPF8|A0A087WPF8_MOUSE;tr|A0A087WSR2|A0A087WSR2_MOUSE;sp|Q8VCR7|ABHEB_MOUSE;tr|A0A087WRJ2|A0A087WRJ2_MOUSE;tr|A0A087WP24|A0A087WP24_MOUSE	7	7	7	46.2	46.2	46.2	22.45	0	119.99	295030000	114	23.9463	23.1749	23.303	22.9894	23.6532	24.031	23.449	23.6498	24.3258	23.9716	E9QN99	E9QN99_MOUSE	Abhd14b	Protein ABHD14B
G5E8R3	G5E8R3_MOUSE	Pcx	Pyruvate carboxylase		0.168303	0.376111	tr|G5E8R3|G5E8R3_MOUSE;tr|E9QPD7|E9QPD7_MOUSE;sp|Q05920|PYC_MOUSE	30	30	30	37.1	37.1	37.1	129.7	0	323.31	1075800000	294	25.2912	22.8301	23.3275	22.2883	24.1971	23.6843	23.4978	20.561	24.7054	23.6051	G5E8R3	G5E8R3_MOUSE	Pcx	Pyruvate carboxylase
F7CVL0	F7CVL0_MOUSE	Dot1l	Histone-lysine N-methyltransferase, H3 lysine-79 specific (Fragment)		0.0860342	0.441323	tr|F7CVL0|F7CVL0_MOUSE;tr|Q6XZL8|Q6XZL8_MOUSE	2	2	2	2.3	2.3	2.3	128.71	0.0041609	4.5436	989480000	27	20.6164	26.2059	24.8217	19.5323	25.3684	19.1033	20.3316	25.3327	24.4633	25.1073	F7CVL0	F7CVL0_MOUSE	Dot1l	Histone-lysine N-methyltransferase, H3 lysine-79 specific (Fragment)
G3UYJ7	G3UYJ7_MOUSE	Gm20441	Predicted gene 20441 (Fragment)		0.109444	-0.2724	tr|G3UYJ7|G3UYJ7_MOUSE	6	6	2	30.2	30.2	6	28.523	0	75.66	54083000	33	21.8011	20.8994	19.8091	19.5857	22.3442	21.8258	19.4357	19.4609	23.3776	21.7015	G3UYJ7	G3UYJ7_MOUSE	Gm20441	Predicted gene 20441 (Fragment)
G3X8T9	G3X8T9_MOUSE	Serpina3n	Serine protease inhibitor A3N		0.426429	-0.205472	tr|G3X8T9|G3X8T9_MOUSE	14	12	2	39.2	35.6	6.7	46.766	0	323.31	912610000	234	23.9917	24.3762	24.5902	24.6784	23.8364	24.4733	24.7322	24.8412	24.0126	24.4411	G3X8T9	G3X8T9_MOUSE	Serpina3n	Serine protease inhibitor A3N
Q3V117	Q3V117_MOUSE	Acly	ATP-citrate synthase		0.367797	0.232465	tr|Q3V117|Q3V117_MOUSE;sp|Q91V92|ACLY_MOUSE	47	47	47	56.9	56.9	56.9	120.79	0	323.31	7993600000	1939	26.2838	25.7732	25.6754	25.6827	26.5359	25.7955	25.5949	25.1006	26.4363	25.8613	Q3V117	Q3V117_MOUSE	Acly	ATP-citrate synthase
Q5SW46	Q5SW46_MOUSE	Lpo	Lactoperoxidase		0.056441	-0.0317497	tr|Q5SW46|Q5SW46_MOUSE	13	13	13	22.7	22.7	22.7	80.123	0	83.215	243970000	83	23.2136	23.8507	24.05	24.1348	23.6699	23.6305	24.0025	24.1622	23.5473	23.7354	Q5SW46	Q5SW46_MOUSE	Lpo	Lactoperoxidase
Q6S9I0	Q6S9I0_MOUSE	Kng2	Kininogen 2		0.0820025	-0.0624527	tr|Q6S9I0|Q6S9I0_MOUSE;tr|Q6S9I2|Q6S9I2_MOUSE;tr|Q6S9I3|Q6S9I3_MOUSE;tr|E0CYI5|E0CYI5_MOUSE	12	9	9	41.8	32.8	32.8	47.887	0	299.91	480430000	143	22.8273	23.557	23.2328	23.4748	22.8189	23.1863	23.656	23.7074	22.424	23.2493	Q6S9I0	Q6S9I0_MOUSE	Kng2	Kininogen 2
Q6XLQ8	Q6XLQ8_MOUSE	Calu	Calumenin		0.738923	-0.477454	tr|Q6XLQ8|Q6XLQ8_MOUSE	9	9	1	37.1	37.1	3.2	37.117	0	97.498	137960000	69	21.15	21.1125	20.9838	20.187	21.9723	21.4236	21.2172	21.2678	22.033	21.8513	Q6XLQ8	Q6XLQ8_MOUSE	Calu	Calumenin
Q7M748	Q7M748_MOUSE	Wap	Whey acidic protein		1.04472	0.378426	tr|Q7M748|Q7M748_MOUSE	8	8	3	73.1	73.1	26.1	14.422	0	323.31	1072700000000	8862	33.2353	33.9276	33.8237	33.6649	33.1292	33.1686	33.247	33.4995	32.7821	33.1915	Q7M748	Q7M748_MOUSE	Wap	Whey acidic protein
Q8C845	Q8C845_MOUSE	Efhd2	EF-hand domain-containing protein D2		0.156012	0.315633	tr|Q8C845|Q8C845_MOUSE;sp|Q9D8Y0|EFHD2_MOUSE	7	7	7	27.9	27.9	27.9	26.8	0	131.57	218610000	49	22.7194	22.7271	22.6287	22.4867	23.227	23.0789	22.6063	19.43	23.7311	23.3644	Q8C845	Q8C845_MOUSE	Efhd2	EF-hand domain-containing protein D2
Q8VCU2	Q8VCU2_MOUSE	Gpld1	Glycosyl-phosphatidylinositol-specific phospholipase D		0.549242	-0.40333	tr|Q8VCU2|Q8VCU2_MOUSE;sp|O70362|PHLD_MOUSE	10	10	10	17.2	17.2	17.2	93.622	0	48.438	86255000	61	20.904	22.3448	22.0925	22.1529	21.4334	21.9509	22.4668	22.7436	21.4514	22.3316	Q8VCU2	Q8VCU2_MOUSE	Gpld1	Glycosyl-phosphatidylinositol-specific phospholipase D
Q91VB8	Q91VB8_MOUSE	Hba-a1	Alpha globin 1		1.39853	-3.48959	tr|Q91VB8|Q91VB8_MOUSE;sp|P01942|HBA_MOUSE	7	7	6	83.8	83.8	77.5	15.112	0	101.87	477780000	87	23.5085	18.7604	18.0499	19.0373	24.6693	25.0581	25.1329	23.203	24.6857	23.3936	Q91VB8	Q91VB8_MOUSE	Hba-a1	Alpha globin 1
Q91VV1	Q91VV1_MOUSE	Csn1s1	Alpha-S1-casein		1.62839	0.904461	tr|Q91VV1|Q91VV1_MOUSE;sp|P19228|CASA1_MOUSE	8	8	8	39.1	39.1	39.1	33.244	0	323.31	15684000000	1279	28.113	29.3717	29.1278	29.4693	28.1682	27.8881	28.2794	27.8946	27.5034	28.1622	Q91VV1	Q91VV1_MOUSE	Csn1s1	Alpha-S1-casein
Q924B0	Q924B0_MOUSE	Impa1	Inositol-1-monophosphatase		0.0528554	0.135638	tr|Q924B0|Q924B0_MOUSE;sp|O55023|IMPA1_MOUSE;tr|Q80ZJ2|Q80ZJ2_MOUSE;tr|A0A0A6YW07|A0A0A6YW07_MOUSE	10	10	10	39.7	39.7	39.7	30.429	0	154.35	96970000	44	21.6878	20.2595	21.0255	18.5426	23.3153	21.0777	19.6285	20.6062	22.4089	20.4314	Q924B0	Q924B0_MOUSE	Impa1	Inositol-1-monophosphatase
Q9CQB8	Q9CQB8_MOUSE	Pate6	Prostate and testis-expressed 6		1.4516	-1.99739	tr|Q9CQB8|Q9CQB8_MOUSE	2	2	2	16	16	16	12.189	0	323.31	310220000	85	22.7671	22.6411	22.6163	19.3105	19.7112	23.3811	23.3973	23.8196	22.9591	23.4762	Q9CQB8	Q9CQB8_MOUSE	Pate6	Prostate and testis-expressed 6

## Sheet: Tab 3 MQ parameters
Parameter	Value
Version	1.6.17.0
User name	John.Lippolis
Machine name	ARSIAAME4VPJLIP
Date of writing	2021-04-17 02:09:40
Include contaminants	TRUE
PSM FDR	0.01
PSM FDR Crosslink	0.01
Protein FDR	0.01
Site FDR	0.01
Use Normalized Ratios For Occupancy	TRUE
Min. peptide Length	7
Min. score for unmodified peptides	0
Min. score for modified peptides	40
Min. delta score for unmodified peptides	0
Min. delta score for modified peptides	6
Min. unique peptides	0
Min. razor peptides	1
Min. peptides	1
Use only unmodified peptides and	TRUE
Modifications included in protein quantification	Oxidation (M);Acetyl (Protein N-term)
Peptides used for protein quantification	Razor
Discard unmodified counterpart peptides	TRUE
Label min. ratio count	2
Use delta score	FALSE
iBAQ	FALSE
iBAQ log fit	FALSE
Match between runs	FALSE
Find dependent peptides	FALSE
Fasta file	D:\Protein Databases\210202_UP_MusMusculus.fasta
Decoy mode	revert
Include contaminants	TRUE
Advanced ratios	TRUE
Fixed andromeda index folder
Combined folder location
Second peptides	TRUE
Stabilize large LFQ ratios	TRUE
Separate LFQ in parameter groups	FALSE
Require MS/MS for LFQ comparisons	TRUE
Calculate peak properties	FALSE
Main search max. combinations	200
Advanced site intensities	TRUE
Write msScans table	FALSE
Write msmsScans table	TRUE
Write ms3Scans table	TRUE
Write allPeptides table	TRUE
Write mzRange table	TRUE
Write DIA fragments table	FALSE
Write pasefMsmsScans table	TRUE
Write accumulatedPasefMsmsScans table	FALSE
Max. peptide mass [Da]	4600
Min. peptide length for unspecific search	8
Max. peptide length for unspecific search	25
Razor protein FDR	TRUE
Disable MD5	FALSE
Max mods in site table	3
Match unidentified features	FALSE
Epsilon score for mutations
Evaluate variant peptides separately	TRUE
Variation mode	None
MS/MS tol. (FTMS)	20 ppm
Top MS/MS peaks per Da interval. (FTMS)	12
Da interval. (FTMS)	100
MS/MS deisotoping (FTMS)	TRUE
MS/MS deisotoping tolerance (FTMS)	7
MS/MS deisotoping tolerance unit (FTMS)	ppm
MS/MS higher charges (FTMS)	TRUE
MS/MS water loss (FTMS)	TRUE
MS/MS ammonia loss (FTMS)	TRUE
MS/MS dependent losses (FTMS)	TRUE
MS/MS recalibration (FTMS)	FALSE
MS/MS tol. (ITMS)	0.5 Da
Top MS/MS peaks per Da interval. (ITMS)	8
Da interval. (ITMS)	100
MS/MS deisotoping (ITMS)	FALSE
MS/MS deisotoping tolerance (ITMS)	0.15
MS/MS deisotoping tolerance unit (ITMS)	Da
MS/MS higher charges (ITMS)	TRUE
MS/MS water loss (ITMS)	TRUE
MS/MS ammonia loss (ITMS)	TRUE
MS/MS dependent losses (ITMS)	TRUE
MS/MS recalibration (ITMS)	FALSE
MS/MS tol. (TOF)	40 ppm
Top MS/MS peaks per Da interval. (TOF)	10
Da interval. (TOF)	100
MS/MS deisotoping (TOF)	TRUE
MS/MS deisotoping tolerance (TOF)	0.01
MS/MS deisotoping tolerance unit (TOF)	Da
MS/MS higher charges (TOF)	TRUE
MS/MS water loss (TOF)	TRUE
MS/MS ammonia loss (TOF)	TRUE
MS/MS dependent losses (TOF)	TRUE
MS/MS recalibration (TOF)	FALSE
MS/MS tol. (Unknown)	20 ppm
Top MS/MS peaks per Da interval. (Unknown)	12
Da interval. (Unknown)	100
MS/MS deisotoping (Unknown)	TRUE
MS/MS deisotoping tolerance (Unknown)	7
MS/MS deisotoping tolerance unit (Unknown)	ppm
MS/MS higher charges (Unknown)	TRUE
MS/MS water loss (Unknown)	TRUE
MS/MS ammonia loss (Unknown)	TRUE
MS/MS dependent losses (Unknown)	TRUE
MS/MS recalibration (Unknown)	FALSE
Site tables	Oxidation (M)Sites.txt

## Sheet: Tab 4 Perseus Processing
Process	Description
Processing -- Filter rows based on categorical column	Remove Only identified by site
Processing -- Filter rows based on categorical column	Remove Reverse
Processing -- Filter rows based on categorical column	Remove Potential contaminant
Remove empty columns
Rename columns	A-> 117, B-> 171 etc
Categorical annotation rows	Name= Genotype, KO or WT (A-E= KO)
Processing -- Transform	log2(x)
Analysis -- Volcano Plot	Group-Genotype, First Group KO
This is the processing for the Differential expression dataset
Continued processing for imputed data
Processing -- Filter rows based on valid values	Min=3, In at least one group
Processing -- Replace missing values from normal distribution
Analysis -- Volcano Plot	Group-Genotype, First Group KO
This is the processing for the Imputed dataset
